## The endosome is a master regulator of plasma membrane collagen fibril assembly

<sup>1</sup>Joan Chang\*, <sup>1</sup>Adam Pickard, <sup>1</sup>Richa Garva, <sup>1</sup>Yinhui Lu, <sup>2</sup>Donald Gullberg and <sup>1</sup>Karl E. Kadler\*

<sup>1</sup>Wellcome Centre for Cell-Matrix Research, Faculty of Biology, Medical and Health, University of Manchester, Michael Smith Building, Oxford Road, Manchester M13 9PT UK,

<sup>2</sup>Department of Biomedicine and Center for Cancer Biomarkers, Norwegian Center of Excellence, University of Bergen, Norway.

\* Co-corresponding authors: JC email: [joan.chang@manchester.ac.uk](mailto:joan.chang@manchester.ac.uk) (orcid.org/0000-0002-7283-9759); KEK email: [karl.kadler@manchester.ac.uk](mailto:karl.kadler@manchester.ac.uk) (orcid.org/0000-0003-4977-4683)

Keywords: collagen-I, endocytosis, extracellular matrix, fibril, fibrillogenesis, integrin- $\alpha$ 11, trafficking, VPS33b,

[abstract] [149 word max]

**Collagen fibrils are the principal supporting elements in vertebrate tissues. They account for 25% of total protein mass, exhibit a broad range of size and organisation depending on tissue and stage of development, and can be under circadian clock control. Here we show that the remarkable dynamic pleomorphism of collagen fibrils is underpinned by a mechanism that distinguishes between collagen secretion and initiation of fibril assembly, at the plasma membrane. Collagen fibrillogenesis occurring at the plasma membrane requires vacuolar protein sorting (VPS) 33b (which is under circadian clock control), collagen-binding integrin- $\alpha$ 11 subunit, and is reduced when endocytosis is inhibited. Fibroblasts lacking VPS33b secrete soluble collagen without assembling fibrils, whereas constitutive over-expression of VPS33b increases fibril number with loss of fibril rhythmicity. In conclusion, our study has identified the mechanism that switches secretion of collagen (without forming new fibrils) to new collagen fibril assembly, at the plasma membrane.**

A primary function of vertebrate cells is to synthesise the matrisome, which is an ensemble of 1000+ genes encoding extracellular matrix (ECM) and ECM-associated proteins <sup>1</sup>. The ECM, which can account for up to 70% of the mass of vertebrates, is essential for metazoan development because it provides attachment sites for cell migration and provides biomechanical support and protection against crushing and tensile forces. However, synthesis of the matrisome is, in itself, insufficient to generate a functional ECM; scaffolding proteins, such as collagens, are assembled into defined numbers of elongated fibrils that are organised into precise three-dimensional architectures <sup>2-4</sup> to give tissues and organs their physical form, polarity, mechanical properties, and adaptability to environmental stimuli. Collagen fibrils are the largest (up to centimetres in length<sup>5</sup>) protein polymers in vertebrates and account for ~25% of total body protein mass <sup>6</sup>. They exhibit a characteristic *D*-periodic axial banding pattern (where *D* = 67 nm) <sup>7</sup>, are roughly circular in cross section, range in diameter from ~12 nm to ~500 nm <sup>8</sup>, and grow in length from their two pointed tips <sup>9,10</sup>. Studies in tendon and cartilage have shown that collagen fibrils are synthesised during development <sup>4</sup> and persist throughout life without turnover (in humans <sup>11</sup> and mice <sup>12</sup>). Therefore, having the right number, length and organisation of collagen fibrils is critical for normal cell behaviour and tissue health.

Collagen can be purified from tissues and reconstituted in neutral buffers to generate fibrils with the same *D*-periodicity as those that occur *in vivo* <sup>7</sup>. However, the fibrils lack a preferred orientation and the control of fibril number and diameter distribution is lost. Collagen fibril length is difficult to ascertain, either *in vivo* or *in vitro*; therefore, it is unknown if the centimetre lengths that are attained *in vivo* are reproduced *in vitro*. Considering that collagen can self-assemble into fibrils, but that higher-order assemblies are lost *in vitro*, implies that cells exert control over the fibril assembly process to

produce tissue-specific matrices. We hypothesised that the endosomal system, with its complex collection of vesicles trafficking between the Golgi and the plasma membrane, could contribute to such a mechanism.

Support for this hypothesis comes from a previous report that the assembly of collagen fibrils is under the control of the circadian clock<sup>13</sup> and that vacuolar protein sorting (VPS) 33b (a regulator of SNARE-dependent membrane fusion in the endocytic pathway) is circadian clock regulated. VPS33b forms a distinct complex with VIPAS39 (also known as VIPAR)<sup>14</sup>, and mutations in the *VPS33B* gene cause arthrogyrosis-renal dysfunction-cholestasis (ARC) syndrome<sup>15</sup>, with death usually occurring within the first year of birth with renal insufficiency, jaundice, multiple congenital anomalies, predisposition to infection, and failure to thrive<sup>16</sup>. One proposed disease-causing mechanism is abnormal post-Golgi trafficking of lysyl hydroxylase 3 (LH3, PLOD3), which is essential for collagen homeostasis during development<sup>17</sup>. Additional support for tight cellular control of collagen fibril formation comes from electron microscope observations of collagen fibrils at the plasma membrane of embryonic avian and rodent tendon fibroblasts<sup>18,19</sup>. Here, one of the two tips of newly-formed collagen fibrils is enclosed within a plasma membrane invagination termed a fibripositor<sup>20</sup>. The second tip protrudes into the extracellular matrix. One way in which cells could exert control over collagen fibrillogenesis is by separating initiation of fibril formation (nucleation at the plasma membrane) from longitudinal growth. Nucleation at the plasma membrane would give precise control of fibril number whereas propagation (involving either the proximal or distal tip) would contribute to tissue expansion. However, despite ultrastructural observations, direct mechanistic support for these observations was lacking.

Here, we showed that cells lacking VPS33b did not exhibit fibripositors and could not assemble collagen fibrils, which was in contrast to control cells that exhibited fibripositors and assembled fibrils at their plasma membrane. Instead, VPS33B knockout cells secreted soluble collagen and accumulated collagen in intracellular puncta. Using a split-GFP approach, we showed that collagen-I and VPS33b were contained in vesicles below the plasma membrane. We showed using biotin-surface labelling that col5a1 (a critical chain of collagen-V) and integrin- $\alpha$ 11 subunit (a collagen-binding integrin involved in collagen reorganisation<sup>21</sup>) are absent from the surface of VPS33b knockout cells. Together, these results provide insights into the importance of the endosomal system in orchestrating and regulating the assembly of collagen fibrils at the plasma membrane.

## Results

### Collagen-I is endocytosed and reassembled into fibrils

As a first experiment, we made Cy3 labelled collagen-I (Cy3-coll) using previously described methods<sup>22</sup> and incubated it with freshly isolated tail tendons for 3 days, then imaged the mid-section of the tendon (Figure 1A). Cells in tendon (nuclei marked with Hoechst stain) show a clear uptake of Cy3-coll within the cytoplasm (Figure 1A, yellow box and indicated by yellow arrowheads). Additionally, fibrillar Cy3 fluorescence signals that transverse between cells were also observed (Figure 1A, grey box and indicated by white arrows). Pulse-chase experiments were performed, where Cy3-coll was added to the tendons for 3 days, followed by 5FAM-coll for a further 2 days (Supplementary Figure 1A). The results confirmed that collagen-I can be taken up by cells regardless of the fluorophore used; additionally, there are distinct areas where only Cy3-positivity was observed (Supplementary 1A, yellow box). The persistence of Cy3-coll indicated that not all collagen endocytosed by cells is directed to degradation. 5FAM-positive fibril-like structures were also observed, suggesting that collagen-I taken up by cells is recycled to the matrix (Supplementary 1A, grey box). Next, we added Cy3-coll to

cultured tendon fibroblasts. Immunofluorescence staining indicated co-localisation of endogenous collagen-I with Cy3-labelled collagen-I (Figure 1B). Therefore, endocytosed collagen can be repurposed into fibrils without being targeted for degradation. Taken together, these results demonstrated that exogenous collagen-I can be taken up by cells both *in vitro* and in tendon tissues *ex vivo*.

We considered the possibility that the fluorescent fibril-like structures were the result of Cy3-coll attachment to pre-existing fibres in the extracellular matrix, or to spontaneous cell-free fibrillogenesis. Therefore, we incubated Cy3-coll at concentrations that spanned the 0.4  $\mu\text{g}/\text{mL}$  critical concentration for cell-free *in vitro* fibril formation<sup>23</sup>, in the presence and absence of cells (Figure 1C). In the absence of cells, Cy3-positive fibrils were observed at 1  $\mu\text{g}/\text{mL}$  and 5  $\mu\text{g}/\text{mL}$  with no discernible Cy3-positive fibrils at 0.1  $\mu\text{g}/\text{mL}$  Cy3-coll (Figure 1C, left panel). However, in the presence of cells, Cy3-positive fibrillar structures were observed at the surfaces of cells at all concentrations of Cy3-coll examined, including 0.1  $\mu\text{g}/\text{mL}$  (Figure 1C, right panel and Figure 1D). These results indicated that the cells actively recycled Cy3-coll into fibrils. As a next experiment, we incubated cells with Cy3-coll or Cy5-coll for 1 hr and released the cells from the cell culture plastic. Flow cytometry imaging revealed that tagged collagen-I is endocytosed by the cells into distinct vesicles (Figure 1E). After overnight incubation, flow cytometry analysis revealed ~ 80% of the fibroblasts had taken up Cy3-coll (Figure 1F). Further time course analyses revealed a time-dependent, as well as concentration-dependent, increase of collagen-I uptake (Figure 1G). Similar results were obtained using Cy5-coll, indicating that soluble monomeric collagen-I can be taken up by cells regardless of the fluorophore attached (Supplementary Figure 1B, C).

### **The endocytic pathway controls collagen-I secretion and fibril assembly**

Having shown that cells can take up and recycle collagen-I to extracellular fibrils, we asked if the endocytic process is *required* for collagen deposition or fibril formation. To address this, we first used Dyngo4a (Dyng) to inhibit clathrin-mediated endocytosis. We confirmed that Dyng treatment at 20  $\mu\text{M}$  leads to ~ 60% reduction in Cy3-coll uptake (Figure 2A) and does not affect cell viability even after long periods in culture (Supplementary Figure 2A).

We then investigated the effects of Dyng treatment on the ability of fibroblasts to assemble collagen fibrils. Murine tendon fibroblasts (which are prolific at secreting collagen-I and assembling fibrils) were treated with Dyng for 48 hrs and conditioned media (CM) collected to assess levels of secreted collagen-I. The results showed that the amount of soluble collagen-I secreted was greatly reduced in Dyng-treated cells (Figure 2B). Moreover, this was coupled with a reduction in the number of collagen-I fibres in the cell-derived matrix, as indicated by immunofluorescence (Figure 2C). qPCR analyses revealed that *col1a1* transcripts were significantly reduced in cells treated with Dyng (Figure 2D), suggesting the possible existence of a feedback mechanism between endocytosis and collagen-I secretion. Taken together, these results suggest that inhibiting endocytosis in fibroblasts does not lead to accumulation of soluble collagen-I monomers in the extracellular space. Rather, endocytosis is directly involved in collagen fibrillogenesis, which in turn regulates collagen transcript levels through an unidentified negative feedback loop.

### **Collagen-I endocytosis is circadian clock regulated**

Previously, we have demonstrated that circadian clock-synchronised fibroblasts synthesise collagen fibrils in a circadian clock rhythmic manner<sup>13</sup>; the results here thus far indicate an involvement of endocytosis in collagen fibrillogenesis. Therefore, we tested the hypothesis that collagen-I endocytosis may also be circadian clock regulated. Time-series flow cytometry analyses on fibroblasts

incubated with Cy3-coll revealed that the level of Cy3-coll endocytosed by the cells is rhythmic, with a periodicity of 23.8 hrs as determined by MetaCycle analysis (Figure 2E, left). When corrected to the running average, the rhythmic nature of Cy3-coll uptake is accentuated (Figure 2E, right). We noted that, when compared to the number of fibrils produced over time, the peak time of uptake has an inverse correlation with fibril numbers (Supplementary Figure 2B). This suggested to us that the cells may be endocytosing exogenous collagen and holding it in the endosomal compartment under circadian clock control, then trafficking the collagen to the plasma membrane for fibril formation. A possible function of this delay could be to increase the concentration of collagen-I in readiness for fibril initiation, which is supported by our findings above where fibroblasts can take a starting concentration of Cy3-coll of 0.1  $\mu\text{g}/\text{mL}$  (which is lower than the 0.4  $\mu\text{g}/\text{mL}$  critical concentration for fibril formation, Figure 1C, D) and concentrate it sufficiently to assemble fibrils.

### **VPS33b controls collagen fibril homeostasis**

VPS33b is situated in the post-Golgi space where it is involved in endosomal trafficking with multiple functions including extracellular vesicle formation<sup>24</sup>, modulation of P53 signalling<sup>25</sup>, and maintenance of cell polarity<sup>26</sup>, dependent on cell type. We previously identified VPS33b to be a circadian-controlled component of the collagen-I secretory pathway in fibroblasts<sup>13</sup>. As a result, we decided to interrogate further its role in endosomal recycling of collagen-I.

We first confirmed our previous finding that CRISPR-knockout of VPS33b (VPSko, as verified by Western blot analysis and qPCR analysis, Supplementary Figure 3A and B) in tendon fibroblasts led to fewer collagen fibrils, as evidenced by both electron microscopy (Figure 3A) and immunofluorescence microscopy (Figure 3B). The impact on matrix deposition was verified by analysis of the decellularized matrices. The results showed that VPSko fibroblasts produced less matrix (by mass) than control cells (Figure 3C, left), which was mirrored by a reduction in hydroxyproline content (Figure 3C, right). This decrease in matrix deposition was not due to changes in cell proliferation (Supplementary Figure 3C).

To further investigate the role of VPS33b in collagen-I homeostasis, we stably overexpressed VPS33b in fibroblasts (VPSoe). Overexpression was confirmed by western blot, qPCR analyses, and flow cytometry of transfected cells (Supplementary Figure 3D, E, F). The mean total matrix and mean total hydroxyproline were higher in VPSoe cultures but not significant (Figure 3D). Immunofluorescence staining of cells after 3 days in culture indicated a greater number of collagen-I fibrils in VPSoe cells (Figure 3E). Vps33b overexpressing cell lines showed equivalent proliferation to controls over the time course of these experiments (Supplementary Figure 3G), suggesting VPSoe enhanced the assembly of collagen fibrils. We then synchronised control and VPSoe fibroblasts and performed time-series immunofluorescence to quantify the number of collagen fibres formed. Similar to our previous finding in primary lung fibroblasts<sup>13</sup>, murine tendon fibroblasts exhibited a ~ 24 hrs rhythmic increase and decrease in collagen-I fibre numbers; however, VPSoe cells continuously deposited collagen-I fibres over the 55-hr period (Figure 3F). MetaCycle analyses indicated that the increase and decrease in fibre numbers in control and VPSoe cultures occurred at a periodicity of 22.7 hrs and 28.0 hrs, respectively (Supplementary Figure 3H). This indicates that continuous expression of VPS33b leads to loss of collagen-I fibre circadian homeostasis. Interestingly, when assessing the levels of soluble collagen-I monomers present in the culture medium from control and VPSoe cells, VPSoe cells have lower levels of soluble collagen-I (Figure 3G). In addition, when VPS33b is knocked-down using siRNA, there is an elevation of soluble collagen-I secreted into the CM; siVPS33b on VPSoe cells also increased the levels of collagen-I in CM similar to the level seen in control cells (Supplementary Figure 3I). These findings strongly indicate that VPS33b is not involved in collagen-I secretion per se, but specifically

collagen-I fibre-assembly. The reduction of secreted soluble collagen-I in VPSoe cells suggests that in fibroblasts, VPS33b is directing collagen-I towards fibril assembly.

### **VPS33b containing vesicles carry collagen-I**

To understand the mechanism of VPS33b-directed fibril-assembly, we utilised the split-GFP system<sup>27,28</sup>, where the 214-residue N-terminal fragment (GFP1-10) was cloned onto VPS33b, and the 17-residue C-terminal peptide (GFP11) was cloned onto the pro $\alpha$ 1(I) chain of collagen-I (coll-GFP11, Figure 4A). Using this system, a GFP signal will only be present when VPS33b interacts with collagen-I. We, and others, have previously demonstrated that insertion of tags at the N-terminal of pro $\alpha$ 2(I) or pro $\alpha$ 1(I) chain does not interfere with collagen-I folding or secretion<sup>29,30</sup>. To determine which terminus of the VPS33b protein GFP1-10 should be added, we inserted BFP on either the N-terminal (VPSnBFP) and C-terminal (VPScBFP) ends of VPS33b and imaged the cells. In cells with VPSnBFP, the fluorescence signal is diffuse throughout the cell, and in most instances completely excluded from vesicular structures (Supplementary Figure 4A, left). In contrast, VPScBFP-expressing cells have punctate, vesicular-like blue fluorescence signals (Supplementary Figure 4A, right). Further, previous studies investigating VPS33b interactions have also tagged VPS33b at its C-terminal end<sup>14</sup>. Thus, we cloned GFP1-10 into the C-terminus of VPS33b (VPSbarrel). Notably, when VPScBFP was overexpressed in Dendra2-collagen expressing 3T3 cells<sup>31</sup>, the number of Dendra2-positive fibrils synthesised by VPScBFP cells significantly increased, again verifying the effects of VPS33b overexpression in fibroblast collagen-I deposition (Supplementary Figure 4B). We noted that the average length of the fibril was not significantly different between control and VPScBFP fibroblasts, suggesting that VPS33b is important in initiating fibrillogenesis and not fibril elongation (Supplementary Figure 4C).

Fibroblasts stably expressing VPSbarrel and Coll-GFP11 were imaged to identify the location of the GFP fluorescence. The results showed puncta throughout the cytoplasm (Figure 4B). Intriguingly, GFP fluorescence was also observed at the cell periphery, sometimes aligned with fibrous elements (Figure 4B, zoom). This distribution was similar to the alignment of collagen fibrils seen in Dendra2-collagen expressing cells (Supplementary figure 4D, yellow arrows), suggesting that VPS33b delivers collagen-I to sites of fibrillogenesis. Immunofluorescence staining of endogenous VIPAS39 (a known VPS33b-interacting partner<sup>14</sup>) also revealed co-localisation of VIPAS39 with collagen-I in vesicular structures (Figure 4C); in particular, in some of the co-localised vesicles, the signal of VIPAS39 is strongest surrounding collagen-I (Figure 4C, zoom), suggesting that VIPAS39 is encasing collagen-I.

We then asked if VPS33b is responsible for the endocytosis of collagen-I. Incubation of cells expressing only the VPSBarrel with culture medium collected from cells expressing only Coll-GFP11 revealed that the GFP signal was detected within cells and mostly in vesicle-like structures. However, no GFP signal was detected along the periphery of the cells, presumably where endocytosis would take place (Figure 4D). In addition, flow cytometry analyses of Cy5-coll endocytosed by control, VPSko, and VPSoe fibroblasts showed that there is no consistent change in uptake by VPSko or VPSoe cells (Figure 4E). This was verified in Cy3-coll uptake analysis of cells over-expressing VPScBFP (Supplementary figure 4E). Taken together, these results suggest that VPS33b is involved in the *delivery* of collagen-I to the extracellular space, and not *endocytosis* per se. VPSko cells replated after Cy3- or Cy5-coll uptake have conspicuously fewer fibrils when compared to control. In contrast, VPSoe cells have shorter and more Cy5-coll fibrils, as well as Cy3-coll fibrils (Figure 4F, Supplementary Figure 4F), highlighting the role of VPS33b in recycling endocytosed collagen-I to fibril assembly sites.

### **Integrin- $\alpha$ 11 mediates VPS33b fibrillogenesis**



To help identify other molecules involved in collagen-I fibril formation, we turned to biotin cell surface labelling coupled with mass spectrometry protein identification (LC-MS/MS). Control, VPSko and VPSoe cells were cultured for 3 days prior to biotin-labelling of intact cells in culture, followed by cell lysis, streptavidin-pulldown of biotinylated proteins, and mass spectrometry analysis. We used a “shot-gun” approach to create an overview of protein profiles in control and VPSko and VPSoe cells and visualised the results in a semi-quantitative manner using spectrum counting. In total, 2666 proteins were identified. Comparison between total lysates and biotin-enriched samples demonstrated an enrichment of 742 proteins in the biotin-enriched samples (Supplementary table 1). Gene Ontology (GO) Functional Annotation analysis<sup>32,33</sup> identified the top 25 enriched terms (based on p-values) with the top 5 terms all associated with “extracellular” or “cell surface” (Figure 5A). We took this to indicate that the biotin-labelling procedure had successfully identified proteins at the cell-ECM interface.

We then interrogated the differences between VPSko and control cells. Conspicuously, collagen  $\alpha 1(I)$  and  $\alpha 1(V)$  chains were not detected at the surface of VPSko cells (Figure 5B). The absence of  $\alpha 1(V)$  and  $\alpha 2(V)$  chains (which constitute type V collagen) from the cell surface supports the long-standing view that collagen-V nucleates collagen-I containing fibrils. Gene ontology pointed to integral components of the plasma membrane, these included multiple integrins. Whilst many integrins were detected in all samples there was an absence of integrin- $\alpha 1$  chain and integrin- $\alpha 11$  chain in VPSko cultures. It is well established that integrins are cell-surface molecules that interact extensively with the ECM<sup>34</sup>, with integrin- $\alpha 11$  (partnered with integrin- $\beta 1$ ) being a major collagen receptor<sup>35</sup>. Interestingly, whilst the level of integrin- $\beta 1$  chain detected was also reduced in VPSko cultures, it was not as drastic as the reduction observed for integrin- $\alpha 11$  chain. This is likely due to the promiscuous nature of integrin- $\beta 1$  subunit, being able to partner with other  $\alpha$  subunits for functions other than collagen-I interaction. The absence of integrin- $\alpha 11$  from VPSko cells suggested that VPS33b-mediated collagen fibrillogenesis is mediated through integrin- $\alpha 11\beta 1$ .

VPS33b was conspicuous by its absence from control cell samples (Figure 5B and Supplementary Figure 5A). We have previously struggled to detect VPS33b protein using mass spectrometry<sup>13</sup>; therefore, its absence could be due to low abundance. Noteworthy, we detected VPS33b using split-GFP approaches (Figure 4A and B). VPS33b was detected at the cell surface in VPSoe samples (which over-express VPS33b) along with PLOD3 (Supplementary figure 5A), which was previously identified to be delivered by VPS33b<sup>17</sup>. Using a complementary approach, we showed by western blot analysis of total cell lysate that integrin- $\alpha 11$  expression is significantly reduced in VPSko cells and is maintained, and possibly elevated, in VPSoe cells (Figure 5D and Supplementary Figure 5B). This correlation between VPS33b and integrin- $\alpha 11$  expression levels was confirmed at mRNA level (Figure 5E). These findings suggest that the over-abundance of collagen fibrils in VPSoe fibroblasts requires integrin- $\alpha 11$ . To confirm this, we performed siRNA against *Itga11* on control and VPSoe fibroblasts, and knock-down efficiency was confirmed with qPCR (Supplementary Figure 5C, D). *siltga11* in both control and VPSoe cells reduced the level of collagen-I fibrils in culture after 3 days (Figure 5F), confirming that integrin- $\alpha 11$  is required for collagen-I fibrillogenesis, even in the presence of elevated levels of VPS33b. Interestingly, knocking-down integrin- $\alpha 11$  increases exogenous collagen-I uptake as demonstrated by flow cytometry (Supplementary Figure 5E), suggesting that integrin- $\alpha 11$ , like VPS33b, is not involved in collagen-I endocytosis; instead, we propose that both VPS33b and integrin- $\alpha 11$  chain are involved in directing collagen-I monomers (endogenous or exogenous) to the formation of collagen-I fibrils.

## Discussion

In this study we have identified a molecular mechanism for collagen fibril assembly at the plasma membrane. The major protagonists are collagen-I (the major component of the fibrils), VPS33b (an

endosomal tethering molecule), and integrin- $\alpha$ 11 subunit (a collagen-binding transmembrane receptor when partnered with integrin- $\beta$ 1 subunit). VPS33b is under circadian clock regulation and interacts directly with collagen-I in a VIPAS-dependent endosomal compartment (shown schematically in Figure 6). The requirement of VPS33b for fibril assembly explains the previously-observed rhythmicity of collagen fibril formation by fibroblasts, *in vivo* and *in vitro*. A detail of the mechanism is that VPS33b and integrin- $\alpha$ 11 subunit are essential for targeting collagen-I to sites of fibril assembly at the plasma membrane but are not needed for collagen uptake.

Whilst collagen fibrils have been located within fibripositors at the plasma membrane by electron microscopy, and cell culture studies have highlighted the importance of extrinsic mechanical forces (e.g. see <sup>36-39</sup>), cell-derived forces <sup>40,41</sup>, combined mechanical anchoring and TGF $\beta$ 1 cell activation <sup>42</sup>, and fluid flow <sup>43</sup> in generating an aligned network of collagen fibrils, mechanistic insights into how cells assemble collagen fibrils at the plasma membrane were lacking. Throughout the current study, collagen fibrils and Cy3-coll labelled fibrils were only seen in close proximity to the plasma membrane; fibrils unattached to cells and at distances from cells were not observed. In cells over expressing VPS33b (e.g. see Figure 3E, 4F), in which large numbers of fibrils were generated, all the fibrils were associated with the plasma membrane. Also, in cells in which levels of integrin- $\alpha$ 11 subunit had been reduced, the fewer fibrils generated were associated with the plasma membrane (Figure 5F). The results demonstrate that cells exert control over collagen fibril assembly by anchoring one end of the fibril to the plasma membrane, and uses VPS33b to direct collagen-I to fibrogenic sites at the plasma membrane involving integrin- $\alpha$ 11 subunit. The critical importance of VPS33b in the fibril assembly process was demonstrated in knockdown and knockout experiments in which its absence led to soluble collagen-I being secreted without new fibril formation.

Previous research on endocytosis of collagen-I in fibroblasts has focussed on degradation or signalling as being the endpoint (e.g., <sup>44-48</sup>). However, our results show that collagen-I endocytosis can also contribute towards fibril formation (Figures 1, 2; Supplementary figure 1). This is highlighted when endocytosis is inhibited and fibroblasts can no longer efficiently assemble collagen-I fibrils (Figure 2C). The decision to flip the endocytosed collagen from degradation to recycling may depend on cell type and on the environment in which the cell finds itself. In complex environments such the site of wound healing, for example, both degradation (of denatured collagen molecules) and recycling (of structurally sound collagen molecules to generate new fibrils) could be beneficial. Nevertheless, we suggest that fibroblasts can either assemble fibrils by a canonical 'inside-out' route using collagen that has been synthesised in the ER and trafficked to the plasma membrane via the Golgi apparatus, or, by an 'outside-in-out' route involving the endocytic pathway.

These results highlight decision-making processes in the endosomal pathway, where endocytosed collagen-I can be switched between degradation to fibril assembly and involves VPS33b and integrin- $\alpha$ 11 subunit. We have previously reported that collagen homeostasis is circadian clock controlled. Here, we confirmed that fibroblasts produce collagen-I fibrils in a rhythmic manner *in vitro* (Supplementary Figure 2B, Figure 3F) and went on to show that endocytosis of exogenous collagen-I also fluctuates with time (Figure 2E). Collagen can spontaneously form fibrils in the absence of cells *in vitro*; however, the concentration of collagen must exceed 0.4  $\mu$ g/mL, which is the critical concentration of fibril formation at 37 °C <sup>23</sup>. Here, we showed that fluorescently-tagged collagen-I can spontaneously assemble into fibril-like structures at concentrations greater than 0.4  $\mu$ g/mL but the aggregates formed at lower concentrations are short. In contrast, when cells are present, fluorescently-tagged collagen-I assembles into fibrils even at concentrations where spontaneous aggregation does not occur (Figure 1C, D). Further, overlaying the endocytosis profile with fibril numbers profile indicates

a peak of endocytosis prior to a spike in fibril numbers (Supplementary figure 2B); thus, we propose that endocytosis concentrates the collagen-I to facilitate fibrillogenesis.

Our results showed a direct correlation between VPS33b levels and collagen-I fibrils (Figure 3) and that VPS33b delivers collagen-I directly to cell surface fibrillogenic sites (Figure 4). Importantly, secretion of soluble collagen-I and assembly of collagen-I into fibrils are regulated differently; it is possible for cells to secrete soluble collagen without assembling fibrils. Thus, the abundance of collagen-I secretion into the media is not correlated with the level of VPS33b or the number of fibrils. Instead, VPS33b is responsible for directing collagen-I (either endogenous or captured) to fibre assembly sites. The rhythmicity of VPS33b expression in normal fibroblasts determines the rhythmicity of collagen-I fibres, as highlighted by the loss of fibril rhythmicity in VPS<sub>oe</sub> fibroblast cultures. Conversely, VPS<sub>ko</sub> fibroblasts lack the capacity to recycle labelled collagen-I to assemble fibres, despite still being able to endocytose collagen-I. In turn, VPS33b requires the presence of the collagen-I binding integrin- $\alpha 11\beta 1$  to produce a fibrous collagen-I matrix. Thus, the distinction between secretion of soluble collagen and fibril assembly is important in studies of disease, in which simple measurement of collagen expression or secretion does not equate to fibrogenesis. This distinction between collagen secretion and assembly was also suggested in a recent study on *Pten*-knockout mammary fibroblasts, where SPARC affects collagen fibrillogenesis and not secretion, acting through fibronectin<sup>49</sup>. Of note, whilst SPARC and fibronectin were detected in our previously-reported time-series mass spectrometry analyses (in the SLDOC soluble fraction and high-salt insoluble fractions respectively), they were not circadian clock rhythmic<sup>13</sup>.

Finally, whilst previous research has demonstrated that collagen-I can be secreted in a matter of minutes<sup>20</sup>, other studies have demonstrated a relatively slow emergence of collagen-I fibres over days<sup>31</sup>. This difference may be due in part to the requirement to concentrate the collagen in the endocytic pathway to a level that supports fibril formation, as discussed above. In addition, nucleation of a fibril is expected to involve collagen-V, a minor fibril-forming collagen that is necessary for the appearance of fibrils containing collagen-I *in vivo*<sup>50</sup>. Another long-standing view is that fibronectin may tether collagen to a fibronectin-binding integrin and thereby function as a proteolytically cleavable anchor (see ref<sup>51</sup> and reviewed by<sup>52</sup>). Whilst this study did not focus on the role of fibronectin, biotin-surface labelling mass spectrometry results indicate that the levels of the major fibronectin-binding integrins (integrin- $\alpha 5\beta 1$  and  $\alpha V\beta 3$ ) were not altered between control, VPS<sub>ko</sub>, and VPS<sub>oe</sub> fibroblasts (Supplementary table 2), suggesting that the mechanism by which VPS33b modulates collagen fibrillogenesis does not act directly via fibronectin. Interestingly, it was previously demonstrated that in fibronectin knock-out liver cells, exogenous collagen-V could be added to initiate collagen-I fibrillogenesis<sup>53</sup>. Further, whilst collagen  $\alpha 1(V)$  could only be detected in surface biotin-labelled control and not VPS<sub>ko</sub> or VPS<sub>oe</sub> cells, collagen  $\alpha 2(V)$  was only detected in VPS<sub>oe</sub> cells (Figure 5B). Of note, we have previously shown that collagen  $\alpha 2(V)$  protein was rhythmic and in phase with collagen  $\alpha 1(I)$  and collagen  $\alpha 2(I)$ . Whether collagen-V co-traffics with collagen-I in VPS33b vesicles to fibrillogenic sites at the cell periphery, or collagen-V is directed to the nucleation site by another mechanism, is an important question to address in future studies.

## Materials and Methods

### Cell culture

Unless otherwise stated, all cell culture reagents were obtained from Gibco, and all cells were maintained at 37°C, 5% CO<sub>2</sub> in a humidified incubator. Immortalised mouse tail tendon fibroblasts (iTTF<sup>13</sup>), and NIH3T3 cells with Dendra2-tagged collagen-I expression (Dendra2-3T3<sup>31</sup>) were cultured



at in DMEM/F12 with sodium bicarbonate and L-glutamine (supplemented with 10% fetal calf serum (FCS), 200  $\mu$ M L-ascorbate-2-phosphate (Sigma), and 10,000 U/mL penicillin/streptomycin), and DMEM with sodium bicarbonate and L-glutamine (supplemented with 10% new born calf serum, 200  $\mu$ M L-ascorbate-2-phosphate, and 10,000 U/mL penicillin/streptomycin) media respectively. HEK293T cells were cultured in DMEM with sodium bicarbonate and L-glutamine, supplemented with 10% FCS. Prior to imaging, media was changed to FluoroBrite media with the appropriate supplements.

### **CRISPR-Cas9-Mediated Knockout**

iTTFs were treated with CRISPR-Cas9 to delete *VPS33b* gene as previously described<sup>13</sup>. Gene knockout was confirmed by western blotting and qPCR.

### **Transfection and stable infection of over-expression vectors in cells**

Three different vectors were used to stably over-express *VPS33b* protein in iTTF and 3T3 cells – untagged *VPS33b* overexpression (with red fluorescent protein expression as selection), N-terminus BFP-tagged *VPS33b* overexpression, and C-terminus BFP-tagged *VPS33b* overexpression. All vectors were cloned onto a pLV vector backbone using Gibson Assembly® (NEB). For split-GFP experiments, vectors expressing GFP11-tagged collagen-I and GFP1-10-tagged *VPS33b* were ordered from VectorBuilder. Lentiviral particles were generated in HEK293T cells, and cells were infected in the presence of 8  $\mu$ g/mL polybrene (Millipore). Cells were then sorted using Flow Cytometry to isolate RFP-positive or BFP-positive cells. Alternatively, cells were treated with puromycin (Sigma) or G418 (Sigma) depending on selection marker on the vectors.

### **Fluorescence labelling of collagen-I**

Cy3 or Cy5 NHS-ester dyes (Sigma) were used to fluorescently label rat tail collagen-I (Corning), using a previously described method<sup>22</sup>. Briefly, 3 mg/mL collagen-I gels were made, incubated with 50mM borate buffer (pH 9) for 15 min, followed with incubation with either Cy3-ester or Cy5-ester (Sigma) dissolved in borate buffer in dark overnight at 4°C, gently rocking. Dyes were then aspirated and 50 mM Tris (pH 7.5) were added to quench the dye reaction, and incubated in the dark rocking for 10 min. Gels were washed with PBS (with calcium and magnesium) 6x, incubating for at least 30 min each wash. The gels were then resolubilized using 500 mM acetic acid, and dialyzed in 20 mM acetic acid.

### **RNA isolation and Quantitative Real-Time PCR**

RNA was isolated using TRIzol Reagent (Thermo Fisher Scientific) following manufacturer's protocol, and concentration was measured using a NanoDrop OneC (Thermo Fisher Scientific). Complementary DNA was synthesized from 1  $\mu$ g RNA using TaqMan™ Reverse Transcription kit (Applied Biosystems) according to manufacturer's instructions.

SensiFAST SYBR kit reagents were used in qPCR reactions. Primer sequences used were as followed:

*Col1a1* AGAGCATGACCGATGGAT and AGGCCTCGGTGGACATTA

*Itga11* AGATGTCGCAGACTGGCTTT and CCCTAGGTATGCTGCATGGT,

*Rplp0* ACTGGTCTAGGACCCGAGAAG and CTCCACCTTGCTCCAGTC

*Gapdh* CAGCCTCGTCCCGTAGACAA and CAATCTCCACTTTGCCACTGC

*Vps33b* GCATTCACAGACACGGCTAAG and ACACCACCAAGATGAGGCG

### **Protein extraction and Western blotting**

For lysate experiments, proteins were extracted using urea buffer (8M urea, 50mM Tris-HCl pH7.5, supplemented with protease inhibitors and 0.1%  $\beta$ -mercaptoethanol). For conditioned media (CM) media, cells were plated out at 200,000 cells per 6-well plate, and left for 48-72 hrs before 250  $\mu$ l was

sampled. Samples were mixed with 4xSDS loading buffer with 0.1%  $\beta$ -mercaptoethanol and boiled at 95°C for 5 minutes. The proteins were separated on either NuPAGE Novex 10% polyacrylamide Bis-Tris gels with 1XNuPAGE MOPS SDS buffer or 6% Tris-glycine gels with 1XTris-glycine running buffer (all Thermo Fisher Scientific), and transferred onto polyvinylidene difluoride (PVDF) membranes (GE Healthcare). The membranes were blocked in 5% skimmed milk powder in PBS containing 0.01% Tween 20. Antibodies were diluted in 2.5% skimmed milk powder in PBS containing 0.01% Tween 20. The primary antibodies used were: rabbit polyclonal antibody (pAb) to collagen-I (1:1,000; Gentaur), mouse mAb to vinculin (1:1000; Millipore), rabbit pAb to integrin- $\alpha$ 11 (1:1000; from Donald Gulberg) and mouse mAb to VPS33B (1:500; Proteintech). Horseradish-peroxidase-conjugated antibodies and Pierce ECL western blotting substrate (both from Thermo Fisher Scientific) were used and reactivity was detected on GelDoc imager (Biorad). Alternatively, Licor rabbit-anti-mouse 680, mouse-anti-rabbit 800 were used and reactivity detected on an Odyssey Clx imager.

### **Flow cytometry and imaging**

Cy3- or Cy5-tagged collagen was added to cells and incubated at 37°C, 5% CO<sub>2</sub> in a humidified incubator for predetermined lengths of times before washing in PBS, trypsinised, spun down at 2500 rpm for 3 min at 4 °C, and resuspended in PBS on ice. Cells were analysed for Cy3- or Cy5-collagen uptake using LSRFortessa (BD Biosciences). For imaging, cells were prepared as described, and analysed on Amnis® ImageStream®X Mk II (Luminex).

### **Imaging and immunofluorescence**

For fixed immunofluorescence imaging, cells plated on coverslips were fixed with 100% methanol at -20°C and then permeabilized with 0.5% Triton-X in PBS. Primary antibodies used were as follows: rabbit pAb collagen-I (1:400, Gentaur OARA02579), rabbit pAb VIPAS (1:50, Proteintech 20771-1-AP), mouse mAb FN1 (1:400, Sigma F6140 or Abcam ab6328). Secondary antibodies conjugated to Alexa-488, Cy3, and Cy5 were used (ThermoScientific), and nucleus were counterstained with DAPI (Sigma). Coverslips were mounted using Fluoromount G (Southern Biotech). Images were collected using a Leica SP8 inverted confocal microscope (Leica) using an x63/0.50 Plan Fluotar objective. The confocal settings were as follows: pinhole, 1 Airy unit; scan speed, 400 Hz bidirectional; format 1024 x 1024 or 512 x 512. Images were collected using photomultiplier tube detectors with the following detection mirror settings: DAPI, 410-483; Alexa-488, 498-545 nm; Cy3, 565-623 nm; Cy5, 638-750 nm using the 405 nm, 488 nm, 540 nm, 640 nm laser lines. Images were collected in a sequential manner to minimize bleed-through between channels. When acquiring three-dimensional optical stacks, the confocal software was used to determine the optimal number of Z sections.

For fluorescence live-imaging, cells were plated onto Ibidi  $\mu$ -plates and imaged using Zeiss LSM880 NLO (Zeiss). For split-GFP experiment, cells were seeded for 24h onto Ibidi  $\mu$ -plates before imaging with an Olympus IXplore SpinSR (Olympus) with 100x oil magnification.

### **Decellularisation of cells to obtain extracellular matrix**

Cells were seeded out at 50,000 in a 6-well plate and cultured for 7 days before decellularization. Extraction buffer (20mM NH<sub>4</sub>OH, 0.5% Triton X-100 in PBS) was gently added to cells and incubated for 2 minutes. Lysates were aspirated and the matrix remaining in the dish were washed gently twice with PBS, before being scrapped off into ddH<sub>2</sub>O for further processing.

### **Hydroxyproline Assay**

Samples were incubated overnight in 6 M HCl (diluted in ddH<sub>2</sub>O (Fluka); approximately 1 mL per 20 mg of sample) in screw-top tubes (StarLab) in a sand-filled heating block at 100 °C covered with aluminium foil. The tubes were then allowed to cool down and centrifuged at 12,000 xg for 3 min.

Hydroxyproline standards were prepared (starting at 0.25 mg/mL; diluted in ddH<sub>2</sub>O) and serially diluted with 6 M HCl. Each sample and standard (50  $\mu$ L) were transferred into fresh Eppendorf tubes, and 450  $\mu$ L chloramine T reagent (0.127 g chloramine T in 50% N-propanol diluted with ddH<sub>2</sub>O; brought up to 10 mL with acetate citrate buffer (120 g sodium acetate trihydrate, 46 g citric acid, 12 mL glacial acetic acid, 34 g sodium hydroxide) adjusted to pH 6.5 and then made to 1 litre with dH<sub>2</sub>O; all reagents from Sigma) was added to each tube and incubated at room temperature for 25 min. Ehrlich's reagent (500  $\mu$ L; 1.5 g 4-dimethylaminobenzaldehyde diluted in 10 mL N-propanol:perchloric acid (2:1)) was added to each reaction tube and incubated at 65 °C for 10 min and then the absorbance at 558 nm was measured for 100  $\mu$ L of each sample in a 96-well plate format.

### **Electron Microscopy**

Unless otherwise stated, incubation and washes were done at room temperature. Cells were plated on top of ACLAR films and allowed to deposit matrix for 7 days. The ACLAR was then fixed in 2% glutaraldehyde/100mM phosphate buffer (pH 7.2) for at least 2 hrs and washed in ddH<sub>2</sub>O 3 x 5 min. The samples were then transferred to 2% osmium (v/v)/1.5% potassium ferrocyanide (w/v) in cacodylate buffer (100 mM, pH 7.2) and further fixed for 1 hr, followed by extensive washing in ddH<sub>2</sub>O. This was followed by 40 minutes of incubation in 1% tannic acid (w/v) in 100 mM cacodylate buffer, and then extensive washes in ddH<sub>2</sub>O. and placed in 2% osmium tetroxide for 40 min. This was followed by extensive washes in ddH<sub>2</sub>O. Samples were incubated with 1% uranyl acetate (aqueous) at 4 °C for at least 16 hrs, and then washed again in ddH<sub>2</sub>O. Samples were then dehydrated in graded ethanol in the following regime: 30%, 50%, 70%, 90% (all v/v in ddH<sub>2</sub>O) for 8 min at each step. Samples were then washed 4 x 8 min each in 100% ethanol, and transferred to pure acetone for 10 min. The samples were then infiltrated in graded series of Agar100Hard in acetone (all v/v) in the following regime: 30% for 1 hr, 50% for 1 hr, 75% for overnight (16 hrs), 100% for 5 hrs. Samples were then transferred to fresh 100% Agar100Hard in labelled moulds and allowed to cure at 60 °C for 72 hrs. Sections (80 nm) were cut and examined using a Tecnai 12 BioTwin electron microscope.

### **Surface biotinylation-pulldown Mass Spectrometry**

Cells were grown in 6 well plates for 72 hrs prior to biotinylation protocol. Briefly, cells around 90% confluence were kept on ice and washed in ice-cold PBS, following with incubation with ice-cold biotinylation reagent (prepared fresh, 200  $\mu$ g/mL in PBS, pH 7.8) for 30min at 4°C gently shaking. Cells were then washed twice in ice-cold TBS (50 mM Tris, 100 mM NaCl, pH 7.5), and incubated in TBS for 10 min at 4 °C. Cells were then lysed in ice-cold 1% TritonX (in PBS, with protease inhibitors) and lysates cleared by centrifugation at 13,000 xg for 10 min at 4 °C. Supernatant was then transferred to a fresh tube and 1/5 of the lysates were kept as a reference sample. Streptavidin-sepharose beads are then aliquoted into each sample and incubated for 30min at 4°C rotating. Beads were then washed 3x in ice cold PBS supplemented with 1% TritonX, followed by one final wash in ice cold PBS and boiled at 95°C for 10min in 2x sample loading buffer, followed by centrifugation at top speed for 5min followed by sample preparation for Mass Spectrometry analysis. The protocol used for sample preparation was as described previously<sup>54</sup>. All MS/MS samples were analyzed using Mascot (Matrix Science, London, UK; version 2.5.1). Mascot was set up to search the SwissProt\_2018\_01.fasta; Trembl\_2018\_01 database (selected for *Mus musculus*, 84416 entries) assuming the digestion enzyme to be non-specific. Mascot was searched with a fragment ion mass tolerance of 0.020 Da and a parent ion tolerance of 10.0 PPM. Carbamidomethyl of cysteine was specified in Mascot as a fixed modification. Oxidation of methionine was specified in Mascot as a variable modification. Scaffold (version Scaffold\_4.10.0, Proteome Software Inc., Portland, OR) was used to validate MS/MS based peptide and protein identifications. Peptide identifications were accepted if they could be established at

greater than 50.0% probability by the Peptide Prophet algorithm<sup>55</sup> with Scaffold delta-mass correction. Protein identifications were accepted if they could be established at greater than 95.0% probability and contained at least 2 identified peptides. Protein probabilities were assigned by the Protein Prophet algorithm<sup>56</sup>. Proteins that contained similar peptides and could not be differentiated based on MS/MS analysis alone were grouped to satisfy the principles of parsimony.

### Statistics and reproducibility

Data are presented as the mean  $\pm$  s.e.m. unless otherwise indicated in the figure legends. The sample number (N) indicates the number of independent biological samples in each experiment, and are indicated in the figure legends. Data were analyzed as described in the legends. The data analysis was not blinded, and differences were considered statistically significant at  $P < 0.05$ , using Student's t-test or One-way Anova, unless otherwise stated. Analyses were performed using Graphpad Prism 8 software. Significance levels are: \*  $P < 0.05$ ; \*\*  $P < 0.01$ ; \*\*\*  $P < 0.005$ ; \*\*\*\*  $P < 0.0001$ . For periodicity, analysis was performed using the MetaCycle package<sup>57</sup> in the R computing environment<sup>58</sup> with the default parameters.

### Acknowledgements

The research was generously funded by Wellcome in the form of a Senior Investigator Award (110126/Z/15/Z) and Centre Award (203128/Z/16/Z) to KEK, and a Norwegian Centre of Excellence grant (grants 2233250) and a grant from Nasjonalföreningen for folkehelsen (Project 16216) to DG. The proteomics was performed at the Biological Mass Spectrometry Facility in the Faculty of Biology, Medicine and Health (University of Manchester) with the assistance of Stacey Warwood and Ronan O'Cualain. Imaging was performed at the Bioimaging Facility in the Faculty of Biology, Medicine and Health (University of Manchester). Some of the illustrations were created with Biorender.com.

### Author contributions

JC and KEK conceived the project. JC performed experiments and interpreted data. AP and RG performed experiments, and YL performed electron microscopy analyses. DG provided reagents and data interpretation. All authors co-wrote the manuscript.

### Competing interests

The authors declare no competing interests.

### Figure legends

#### Figure 1

- A. Fluorescent images of tail tendon incubated with Cy3-coll for 5 days, showing presence of collagen-I within the cells, and fibril-like fluorescence signals outside of cells. Hoescht stain was used to locate cells within the tendon. Area surrounded by yellow box expanded on the right, and cells with Cy3-coll present intracellularly pointed out by yellow triangles. Area surrounded by grey box expanded on the right, and fibril-like fluorescence signals indicated with white arrows. Scale bar = 50  $\mu$ m. Representative of N=3.
- B. Fluorescent image series of fibroblasts incubated with 5  $\mu$ g/mL Cy3-coll for 1 hr, trypsinised and replated in fresh media, and incubated for 72 hrs. Labels on top denotes the fluorescence channel corresponding to proteins detected. Representative of N>3. Scale bar = 20  $\mu$ m.
- C. Fluorescent image series of Cy3-coll incubated at different concentrations for 72 hrs, either cell-free (left panel), or with fibroblasts (right panel).

- D. Zoom-in (red box in Figure 1C) of Cy3-positive fibrils assembled by fibroblasts when incubated with 0.1  $\mu\text{g}/\text{mL}$  Cy3-coll.
- E. Flow cytometry imaging of fibroblasts incubated with 5  $\mu\text{g}/\text{mL}$  Cy3-labelled (left) or Cy5-labelled (right) collagen-I for 1 hr, showing that collagen-I is taken up by cells and held in vesicular structures. Images acquired using ImageStream at 40x magnification. Scale bar = 10  $\mu\text{m}$  BF – brightfield channel, Cy3 – Cy3 channel, Cy5 – Cy5 channel, BF/Cy3 or BF/Cy5 – merged image of BF and Cy3 or BF and Cy5 respectively. Representative of >500 cells images collected per condition.
- F. Representative dot plots from flow cytometry analysis representing Cy3 gates used in control and fibroblasts incubated with 1  $\mu\text{g}/\text{mL}$  Cy3-labelled collagen (Cy3-coll) for 18 hrs. Representative of N>3.
- G. Bar chart showing a progressive increase of percentage of fluorescent cells incubated with 1.5  $\mu\text{g}/\text{mL}$  Cy3-coll over time (left), and an increase of percentage fluorescent cells incubated with increasing concentration of Cy3-coll for 1 hr (right), suggesting a non-linear time-dependent and dose-dependent uptake pattern. N=3.

## Figure 2

- A. Scatter plot showing Dyngo4a (Dyng), an endocytosis inhibitor, treatment for 1 hr inhibits over 50% of Cy3-coll uptake in fibroblasts. Bars show mean  $\pm$  s.e.m of N=6. \*\*\*\* $p$ <0.0001.
- B. Western blot analysis of conditioned media taken from fibroblasts treated with DMSO (ctrl) or Dyng (Dyng) for 72 h, showing a decrease in collagen-I secretion. Top: probed with collagen-I antibody (Col-I), bottom: counterstained with Ponceau (Pon) as control. Representative of N=3.
- C. Fluorescent images of collagen-I (red) counterstained with DAPI (blue) in fibroblasts treated with DMSO (top) or Dyng (bottom) for 72 hrs. Scale bar = 20  $\mu\text{m}$ .
- D. qPCR analysis comparing col1a1 mRNA levels in control fibroblasts (DMSO) and Dyng-treated fibroblasts (Dyng), showing a decrease in collagen-I transcripts. Bars showing mean  $\pm$  s.e.m of N=4. \*\*\* $p$ =0.003.
- E. Percentage Cy3-coll taken up by synchronised fibroblasts over 48 hrs. Left: raw values of % Cy3-positive over time. Meta2d analysis indicates a circadian rhythm of periodicity of 23.8 hrs. Right: fluctuation of Cy3-positive cells corrected to running average (average of 12 hrs). Meta2d analysis indicates a circadian rhythm of periodicity of 23.8 hrs. Bars show mean  $\pm$  s.e.m of N=3 per time point.

## Figure 3

- A. Electron microscopy images of fibroblasts plated on Aclar and grown for a week before fixation and imaging. Ctrl culture has numerous collagen-I fibrils, as pointed out by arrows. Yellow arrow points to a fibrilipositor, and green box is expanded to the left bottom corner, showing the distinct D-banding pattern of collagen-I fibril when observed with electron microscopy. VPSko clones all have fewer and thinner fibrils present in the culture (pointed out by red arrows). Representative of N=3. Scale bar = 0.5  $\mu\text{m}$ .



- B. Fluorescence images of collagen-I (red) and DAPI counterstain in ctrl and VPSko fibroblasts. Yellow arrows indicating collagen fibres, and white arrows pointing to collagen-I presence in intracellular vesicles. Representative of N>6. Scale bar = 25  $\mu$ m.
- C. Matrix deposition by ctrl or VPSko cells, after one week of culture. Left: decellularized matrix mass. N>5, \*  $p=0.03$ . Right: hydroxyproline content presented as a ratio between ctrl and VPSko cells. N=5, \*\*\* $p=0.0004$ .
- D. Matrix deposition by ctrl or VPSoe cells, after one week of culture. Left: decellularized matrix mass. N=5. Right: hydroxyproline content presented as a ratio between ctrl and VPSoe cells. N=4.
- E. Fluorescence images of collagen-I (red) and DAPI counterstain in ctrl and VPSoe fibroblasts. Representative of N>6. Scale bar = 20  $\mu$ m.
- F. Relative collagen fibre count in synchronised ctrl (black) and VPSoe (pink) fibroblasts, corrected to the number of fibres in ctrl cultures at start of time course. Fibres scored by two independent investigators. Bars show mean  $\pm$  s.e.m. of N=2 with 6 technical repeats at each time point.
- G. Western blot analysis of conditioned media taken from ctrl and VPSoe after 72 hrs in culture. Top: probed with collagen-I antibody, bottom: counterstained with Ponceau as control. Representative of N=3.

#### Figure 4

- A. Schematic of the split-GFP detection system. GFP1-10 barrel is introduced into VPS33b (VPS-barrel), and GFP11 to Col1a1 (Col1a1-GFP11). If the two tagged proteins co-localize (e.g. in a vesicle), a GFP signal will be emitted.
- B. Brightfield (top) and fluorescence (middle) images of fibroblasts expressing both VPS-barrel and Col1a1-GFP11 constructs. Green box is expanded to the bottom, to highlight the punctate fluorescence signals indicating co-localization within intracellular vesicles, as well as fibril-like structures suggestive of fibril assembly sites. Scale bar = 20  $\mu$ m
- C. Fluorescence images of VIPAS (green), collagen-I (red) and DAPI counterstain in fibroblasts. Representative of N=3. Green box is expanded to the right (flipped 90°) to show VIPAS co-localization with collagen-I. Scale bar = 25  $\mu$ m
- D. Fluorescence (left) and merged (right) images of fibroblasts expressing VPS-barrel incubated with conditioned media containing Col1a1-GFP11 for 24hr. Scale bar = 25  $\mu$ m.
- E. Bar chart comparing the percentage of cells that have taken up 5  $\mu$ g/mL Cy5-coll after 1 hr incubation between control (ctrl), VPS33b-knockout (VPSko) and VPS33b-overexpressing (VPSoe) cells, corrected to control. N>10.
- F. Fluorescence images of cells of different levels of VPS33b expression, fed with Cy5-coll and cultured for 72 hrs. Cultures were counterstained with DAPI. Bottom panel are zoomed-in images of the fibrils produced by the fibroblasts. Representative of N=2.

#### Figure 5

- A. Top 25 Functional Annotation of proteins detected in biotin-enriched samples when compared to non-enriched samples based on p-values. Y-axis denotes the GO term, X-axis denotes  $-\log(P \text{ value})$ .

- B. Heatmap representation of spectral counting of collagens detected in biotin-enriched surface proteins from control (ctrl), VPS33b-knockout (VPSko), and VPS33b-overexpressing (VPSoe) fibroblasts. Scale denotes quantitative value as normalized to total spectra, as determined by Scaffold analyses.
- C. Heatmap representation of spectral counting of integrins detected in biotin-enriched surface proteins from control (ctrl), VPS33b-knockout (VPSko), and VPS33b-overexpressing (VPSoe) fibroblasts. Scale denotes quantitative value as normalized to total spectra, as determined by Scaffold analyses.
- D. Western blot analysis of integrin- $\alpha$ 11 levels in control (ctrl), VPS33b-overexpressing (VPSoe), VPS33b-knockout (VPSko) cells. Top: probed with integrin- $\alpha$ 11 antibody, bottom: re-probed with GAPDH antibody. Representative of N=3.
- E. qPCR analysis of *Itga11* transcript levels in ctrl compared to VPSko fibroblasts (left), and ctrl compared to VPSoe fibroblasts (right). N>3, \*\*\*\* $p$ <0.0001, \* $p$ = 0.0226
- F. Immunofluorescence images of ctrl and VPSoe fibroblasts treated either with control siRNA (scr) or siRNA against *Itga11* (siltga11), after 72 hrs incubation; collagen-I (red) and DAPI (blue) counterstained. Representative of N=3. Scale bar = 25  $\mu$ m.

### Figure 6

Schematic showing how the endosomal system might direct collagen from different sources (endogenous and exogenous) to a site on the plasma membrane for fibril assembly. Grey, de novo synthesised collagen. Red, collagen that has been captured at the plasma membrane. Procollagen is shown with N- and C-propeptides (circle and hexagon, respectively).

### Supplementary Figure 1

- A. Fluorescent images of tail tendon incubated with fluorescently-tagged collagen-I for 5 days – Cy3-coll was added for the first 3 days, with 5FAM-labelled collange-I (FAM-coll) added in the last two days. Images show presence of collagen-I within the cells, and fibril-like fluorescence signals outside of cells. Hoescht stain was used to locate cells within the tendon. Area surrounded by yellow box expanded on the right highlighting a cell with only Cy3-coll present intracellularly. Area surrounded by grey boxes expanded on the right, highlighting fibril-like fluorescence signals that are either FAM-coll positive only, or have co-localization of both Cy3-coll and FAM-coll. Representative of N=2.
- B. Representative dot plots from flow cytometry analysis representing Cy5 gates used in control and fibroblasts incubated with 1  $\mu$ g/mL Cy5-labelled collagen (Cy5-coll) for 18 hrs. Representative of N>3.
- C. Bar chart showing a progressive increase of % of fluorescent cells incubated with 1.5  $\mu$ g/mL Cy5-coll over time (left), and an increase of % fluorescent cells incubated with increasing concentration of Cy5-coll for 1 hr (right), suggesting a non-linear time-dependent and dose-dependent uptake pattern. N=3.

### Supplementary Figure 2

- A. Alamar Blue assay showing that prolonged treatment of 20  $\mu$ M Dyngo4a (Dyng) does not inhibit fibroblast proliferation.

- B. Percentage of Cy3-coll taken up by synchronised cells, corrected to the maximum percentage uptake of the time course (pink, bars show mean  $\pm$  s.e.m of N=3 per time point), compared to the percentage collagen fibre count over time, corrected to the maximum percentage fibril count of the time course (black, fibres scored by two independent investigators. Bars show mean  $\pm$  s.e.m. of N=2 with 6 technical repeats at each time point). Data presented here in maximum percentage fibril count over time (black) are taken from the control as in Figure 5F, presented in a different way.

### Supplementary Figure 3

- A. Western blot analysis of VPS33b knock-out (VPSko) clones compared to control (ctrl) fibroblasts. Top: probed with VPS33b antibody, bottom: probed with GAPDH antibody. Representative of N=3.
- B. qPCR analysis of VPS33b expression in the 3 selected clones. \*\*\*  $p=0.0002$ , \*\*  $p=0.0039$ , \*  $p=0.0163$
- C. Alamar blue analysis of proliferation rates of ctrl fibroblasts and VPSko fibroblasts. Representative of N=3.
- D. Western blot analysis of VPS33b protein levels in control (ctrl) and VPS33b over-expressing (VPSoe) cells. Top panel probed with VPS33b antibody, bottom panel re-probed with vinculin antibody. Representative of N=4.
- E. qPCR analysis of VPS33b expression in ctrl and VPSoe cells. N=4, \*\*\*\*  $p<0.0001$ .
- F. Single parameter histograms of Flow cytometry analysis on ctrl (left) and VPSoe (right) fibroblasts, showing a shift in increase of Cy3 fluorescence and thus expression of VPSoe vector. Representative of N>4.
- G. Alamar blue analysis of proliferation rates of ctrl fibroblasts and VPSoe fibroblasts. Representative of N=3.
- H. MetaCycle analyses of the fibril counts showed a rhythmicity of circa 23 h in ctrl fibroblasts compared with circa 28 hrs in VPSoe fibroblasts.
- I. Western blot analysis of conditioned media taken from ctrl and VPSoe treated either with siRNA scrambled control (scr) or siRNA against *Vps33b* (siVPS), and cultured for 72 hrs. Top: probed with collagen-I antibody, bottom: counterstained with Ponceau as control. Representative of N=2.

### Supplementary Figure 4

- A. Fibroblasts expressing BFP-tagged VPS33b. Left: BFP tagged on the N-terminal end of VPS33b (VPSnBFP), Right: BFP tagged on the C-terminal end (VPScBFP). Images taken in Airy mode. Representative of N>4. Scale bar = 10  $\mu$ m.
- B. Quantification of average number of fibrils per cell in control Dendra-coll expressing 3T3 cells (ctrl) and Dendra-coll expressing 3T3 overexpressing VPScBFP (VPScBFP). >500 cells quantified per condition. N=12. \* $p=0.048$ .
- C. Measurement of average fibril length in arbitrary units (A.U.) in control Dendra-coll expressing 3T3 cells (ctrl) and Dendra-coll expressing 3T3 overexpressing VPScBFP (VPScBFP). >500 cells quantified per condition. N=12.

- D. Image of Dendra-coll in 3T3 fibroblasts. Image taken in Airy mode. Yellow arrows highlighting fibril structures at cell periphery. Representative of N>5. Scale bar = 10  $\mu$ m.
- E. Bar chart comparing the percentage of cells that have taken up 5  $\mu$ g/mL Cy3-coll after 1 hr incubation between control (ctrl), VPS33b-knockout (VPSko) and VPScBFP overexpressing (VPSoe) cells, corrected to control. N>10
- F. Cy3-fed ctrl or VPSoe fibroblasts after 72 hrs incubation. Scale bar = 20  $\mu$ m.

### Supplementary Figure 5

- A. Spectral counts of Plod3 and VPS33b as detected by Mass Spectrometry, scale bar represents quantitative value as normalized to total spectra. Gene names of proteins detected shown here.
- B. Western blot analysis of total lysates taking from control (ctrl), VPS33b-overexpressing (VPSoe), VPScBFP-overexpressing (VPScBFP), VPS33b-knockout (VPSko), probed with ITGA11 and reprobed with  $\beta$ -tubulin or vinculin as a loading control.
- C. qPCR analysis of *Itga11* mRNA expression in ctrl fibroblasts treated either with scrambled control (scr) or siRNA against ITGA11 (siITGa11), collected after 96 hrs. N=3, \*\*P=0.0091.
- D. qPCR analysis of *Itga11* mRNA expression in VPSoe fibroblasts treated either with scrambled control (scr) or siRNA against ITGA11 (siITGa11), collected after 96 hrs. N=3, \*\*\*\*P<0.0001.
- E. Bar chart comparing the percentage of cells that have taken up 5  $\mu$ g/mL Cy5-coll after 1 hr incubation between fibroblasts treated with scrambled control (ctrl) or siRNA against ITGA11 (siITGa11), corrected to scr. N=3. \*\*p=0.0062.

### Supplementary Table 1

Report from Scaffold Viewer on the Quantitative Value (Normalized Total Spectra) detected of each protein in each sample.

### Supplementary Table 2

Specific spectral counts of various proteins as detected by Mass Spectrometry, presented in quantitative value as normalized to total spectra. Gene names of proteins detected shown here.

### References

- 1 Naba, A. et al. The matrisome: in silico definition and in vivo characterization by proteomics of normal and tumor extracellular matrices. *Mol Cell Proteomics* **11**, M111 014647, doi:10.1074/mcp.M111.014647 (2012).
- 2 Young, R. D. et al. Three-dimensional aspects of matrix assembly by cells in the developing cornea. *Proc Natl Acad Sci U S A* **111**, 687-692, doi:10.1073/pnas.1313561110 (2014).
- 3 Starborg, T. et al. Using transmission electron microscopy and 3View to determine collagen fibril size and three-dimensional organization. *Nat Protoc* **8**, 1433-1448, doi:10.1038/nprot.2013.086 (2013).
- 4 Kalson, N. S. et al. A structure-based extracellular matrix expansion mechanism of fibrous tissue growth. *Elife* **4**, doi:10.7554/eLife.05958 (2015).
- 5 Craig, A. S., Birtles, M. J., Conway, J. F. & Parry, D. A. An estimate of the mean length of collagen fibrils in rat tail-tendon as a function of age. *Connect Tissue Res* **19**, 51-62 (1989).
- 6 Smejkal, G. B. & Fitzgerald, C. Revised estimate of total collagen in the human body. *International Journal of Proteomics & Bioinformatics* **2**, 001-002 (2017).

- 7 Kadler, K. E., Holmes, D. F., Trotter, J. A. & Chapman, J. A. Collagen fibril formation. *Biochem J* **316** ( Pt 1), 1-11, doi:10.1042/bj3160001 (1996).
- 8 Parry, D. A., Barnes, G. R. & Craig, A. S. A comparison of the size distribution of collagen fibrils in connective tissues as a function of age and a possible relation between fibril size distribution and mechanical properties. *Proc R Soc Lond B Biol Sci* **203**, 305-321 (1978).
- 9 Holmes, D. F., Chapman, J. A., Prockop, D. J. & Kadler, K. E. Growing tips of type I collagen fibrils formed in vitro are near-paraboloidal in shape, implying a reciprocal relationship between accretion and diameter. *Proc Natl Acad Sci U S A* **89**, 9855-9859, doi:10.1073/pnas.89.20.9855 (1992).
- 10 Kadler, K. E., Hojima, Y. & Prockop, D. J. Collagen fibrils in vitro grow from pointed tips in the C- to N-terminal direction. *Biochem J* **268**, 339-343, doi:10.1042/bj2680339 (1990).
- 11 Heinemeier, K. M., Schjerling, P., Heinemeier, J., Magnusson, S. P. & Kjaer, M. Lack of tissue renewal in human adult Achilles tendon is revealed by nuclear bomb (14)C. *FASEB J* **27**, 2074-2079, doi:10.1096/fj.12-225599 (2013).
- 12 Ariosa-Morejon, Y. et al. Age-dependent changes in protein incorporation into collagen-rich tissues of mice by in vivo pulsed SILAC labelling. *bioRxiv*, doi:doi.org/10.1101/2021.01.13.426496
- 13 Chang, J. et al. Circadian control of the secretory pathway maintains collagen homeostasis. *Nat Cell Biol* **22**, 74-86, doi:10.1038/s41556-019-0441-z (2020).
- 14 Hunter, M. R., Hesketh, G. G., Benedyk, T. H., Gingras, A. C. & Graham, S. C. Proteomic and Biochemical Comparison of the Cellular Interaction Partners of Human VPS33A and VPS33B. *J Mol Biol* **430**, 2153-2163, doi:10.1016/j.jmb.2018.05.019 (2018).
- 15 Gissen, P. et al. Mutations in VPS33B, encoding a regulator of SNARE-dependent membrane fusion, cause arthrogyposis-renal dysfunction-cholestasis (ARC) syndrome. *Nat Genet* **36**, 400-404, doi:10.1038/ng1325 (2004).
- 16 Nezelof, C., Dupart, M. C., Jaubert, F. & Eliachar, E. A lethal familial syndrome associating arthrogyposis multiplex congenita, renal dysfunction, and a cholestatic and pigmentary liver disease. *J Pediatr* **94**, 258-260, doi:10.1016/s0022-3476(79)80839-2 (1979).
- 17 Banushi, B. et al. Regulation of post-Golgi LH3 trafficking is essential for collagen homeostasis. *Nat Commun* **7**, 12111, doi:10.1038/ncomms12111 (2016).
- 18 Trelstad, R. L. & Hayashi, K. Tendon collagen fibrillogenesis: intracellular subassemblies and cell surface changes associated with fibril growth. *Dev Biol* **71**, 228-242, doi:10.1016/0012-1606(79)90166-0 (1979).
- 19 Birk, D. E. & Trelstad, R. L. Extracellular compartments in tendon morphogenesis: collagen fibril, bundle, and macroaggregate formation. *J Cell Biol* **103**, 231-240, doi:10.1083/jcb.103.1.231 (1986).
- 20 Canty, E. G. et al. Coalignment of plasma membrane channels and protrusions (fibripositors) specifies the parallelism of tendon. *J Cell Biol* **165**, 553-563, doi:10.1083/jcb.200312071 (2004).
- 21 Tiger, C. F., Fougousse, F., Grundstrom, G., Velling, T. & Gullberg, D. alpha11beta1 integrin is a receptor for interstitial collagens involved in cell migration and collagen reorganization on mesenchymal nonmuscle cells. *Dev Biol* **237**, 116-129, doi:10.1006/dbio.2001.0363 (2001).
- 22 Doyle, A. D. Fluorescent Labeling of Rat-tail Collagen for 3D Fluorescence Imaging. *Bio Protoc* **8**, doi:10.21769/BioProtoc.2919 (2018).
- 23 Kadler, K. E., Hojima, Y. & Prockop, D. J. Assembly of collagen fibrils de novo by cleavage of the type I pC-collagen with procollagen C-proteinase. Assay of critical concentration demonstrates that collagen self-assembly is a classical example of an entropy-driven process. *J Biol Chem* **262**, 15696-15701 (1987).
- 24 Huang, D. et al. ANGPTL2-containing small extracellular vesicles from vascular endothelial cells accelerate leukemia progression. *J Clin Invest* **131**, doi:10.1172/JCI138986 (2021).
- 25 Liang, Z. et al. VPS33B interacts with NESG1 to modulate EGFR/PI3K/AKT/c-Myc/P53/miR-133a-3p signaling and induce 5-fluorouracil sensitivity in nasopharyngeal carcinoma. *Cell Death Dis* **10**, 305, doi:10.1038/s41419-019-1457-9 (2019).



- 26 Wang, C. *et al.* Vacuolar Protein Sorting 33B Is a Tumor Suppressor in Hepatocarcinogenesis. *Hepatology* **68**, 2239-2253, doi:10.1002/hep.30077 (2018).
- 27 Magliery, T. J. *et al.* Detecting protein-protein interactions with a green fluorescent protein fragment reassembly trap: scope and mechanism. *J Am Chem Soc* **127**, 146-157, doi:10.1021/ja046699g (2005).
- 28 Cabantous, S., Terwilliger, T. C. & Waldo, G. S. Protein tagging and detection with engineered self-assembling fragments of green fluorescent protein. *Nat Biotechnol* **23**, 102-107, doi:10.1038/nbt1044 (2005).
- 29 McCaughey, J., Stevenson, N. L., Cross, S. & Stephens, D. J. ER-to-Golgi trafficking of procollagen in the absence of large carriers. *J Cell Biol* **218**, 929-948, doi:10.1083/jcb.201806035 (2019).
- 30 Calverley, B. C., Kadler, K. E. & Pickard, A. Dynamic High-Sensitivity Quantitation of Procollagen-I by Endogenous CRISPR-Cas9 NanoLuciferase Tagging. *Cells* **9**, doi:10.3390/cells9092070 (2020).
- 31 Pickard, A. *et al.* Collagen assembly and turnover imaged with a CRISPR-Cas9 engineered Dendra2 tag. *bioRxiv*, doi:<https://doi.org/10.1101/331496> (2018).
- 32 Huang da, W., Sherman, B. T. & Lempicki, R. A. Systematic and integrative analysis of large gene lists using DAVID bioinformatics resources. *Nat Protoc* **4**, 44-57, doi:10.1038/nprot.2008.211 (2009).
- 33 Huang da, W., Sherman, B. T. & Lempicki, R. A. Bioinformatics enrichment tools: paths toward the comprehensive functional analysis of large gene lists. *Nucleic Acids Res* **37**, 1-13, doi:10.1093/nar/gkn923 (2009).
- 34 Humphries, J. D., Byron, A. & Humphries, M. J. Integrin ligands at a glance. *J Cell Sci* **119**, 3901-3903, doi:10.1242/jcs.03098 (2006).
- 35 Zeltz, C. & Gullberg, D. The integrin-collagen connection--a glue for tissue repair? *J Cell Sci* **129**, 653-664, doi:10.1242/jcs.180992 (2016).
- 36 Kapacee, Z. *et al.* Tension is required for fibroblast formation. *Matrix Biol* **27**, 371-375, doi:10.1016/j.matbio.2007.11.006 (2008).
- 37 Eastwood, M., McGrouther, D. A. & Brown, R. A. A culture force monitor for measurement of contraction forces generated in human dermal fibroblast cultures: evidence for cell-matrix mechanical signalling. *Biochim Biophys Acta* **1201**, 186-192, doi:10.1016/0304-4165(94)90040-x (1994).
- 38 Grekas, G. *et al.* Cells exploit a phase transition to mechanically remodel the fibrous extracellular matrix. *J R Soc Interface* **18**, 20200823, doi:10.1098/rsif.2020.0823 (2021).
- 39 Holmes, D. F. *et al.* Synchronized mechanical oscillations at the cell-matrix interface in the formation of tensile tissue. *Proc Natl Acad Sci U S A* **115**, E9288-E9297, doi:10.1073/pnas.1801759115 (2018).
- 40 Hinz, B., McCulloch, C. A. & Coelho, N. M. Mechanical regulation of myofibroblast phenotypic conversion and collagen contraction. *Exp Cell Res* **379**, 119-128, doi:10.1016/j.yexcr.2019.03.027 (2019).
- 41 Pakshir, P. *et al.* Dynamic fibroblast contractions attract remote macrophages in fibrillar collagen matrix. *Nat Commun* **10**, 1850, doi:10.1038/s41467-019-09709-6 (2019).
- 42 Kim, J., Boys, A. J., Estroff, L. A. & Bonassar, L. J. Combining TGF-beta1 and Mechanical Anchoring to Enhance Collagen Fiber Formation and Alignment in Tissue-Engineered Menisci. *ACS Biomater Sci Eng*, doi:10.1021/acsbomaterials.0c01791 (2021).
- 43 Nerger, B. A., Brun, P. T. & Nelson, C. M. Marangoni flows drive the alignment of fibrillar cell-laden hydrogels. *Sci Adv* **6**, eaaz7748, doi:10.1126/sciadv.aaz7748 (2020).
- 44 Knowles, G. C., McKeown, M., Sodek, J. & McCulloch, C. A. Mechanism of collagen phagocytosis by human gingival fibroblasts: importance of collagen structure in cell recognition and internalization. *J Cell Sci* **98 ( Pt 4)**, 551-558 (1991).
- 45 Everts, V., Aronson, D. C. & Beertsen, W. Phagocytosis of bone collagen by osteoclasts in two cases of pycnodysostosis. *Calcif Tissue Int* **37**, 25-31, doi:10.1007/BF02557674 (1985).

- 46 Arora, P. D. et al. Collagen remodeling by phagocytosis is determined by collagen substrate topology and calcium-dependent interactions of gelsolin with nonmuscle myosin IIA in cell adhesions. *Mol Biol Cell* **24**, 734-747, doi:10.1091/mbc.E12-10-0754 (2013).
- 47 Vijayan, R. S., Arnold, E. & Das, K. Molecular dynamics study of HIV-1 RT-DNA-nevirapine complexes explains NNRTI inhibition and resistance by connection mutations. *Proteins* **82**, 815-829, doi:10.1002/prot.24460 (2014).
- 48 Madsen, D. H. et al. Extracellular collagenases and the endocytic receptor, urokinase plasminogen activator receptor-associated protein/Endo180, cooperate in fibroblast-mediated collagen degradation. *J Biol Chem* **282**, 27037-27045, doi:10.1074/jbc.M701088200 (2007).
- 49 Jones, C. E. et al. Pten regulates collagen fibrillogenesis by fibroblasts through SPARC. *PLoS One* **16**, e0245653, doi:10.1371/journal.pone.0245653 (2021).
- 50 Wenstrup, R. J. et al. Regulation of collagen fibril nucleation and initial fibril assembly involves coordinate interactions with collagens V and XI in developing tendon. *J Biol Chem* **286**, 20455-20465, doi:10.1074/jbc.M111.223693 (2011).
- 51 Taylor, S. H. et al. Matrix metalloproteinase 14 is required for fibrous tissue expansion. *Elife* **4**, e09345, doi:10.7554/eLife.09345 (2015).
- 52 Moses, M. et al. Collagen assemble at the cell surface: Dogmas revisited. *Cells in press*. (2021).
- 53 Moriya, K. et al. A fibronectin-independent mechanism of collagen fibrillogenesis in adult liver remodeling. *Gastroenterology* **140**, 1653-1663, doi:10.1053/j.gastro.2011.02.005 (2011).
- 54 Herrera, J. A. et al. Laser capture microdissection coupled mass spectrometry (LCM-MS) for spatially resolved analysis of formalin-fixed and stained human lung tissues. *Clin Proteomics* **17**, 24, doi:10.1186/s12014-020-09287-6 (2020).
- 55 Keller, A., Nesvizhskii, A. I., Kolker, E. & Aebersold, R. Empirical statistical model to estimate the accuracy of peptide identifications made by MS/MS and database search. *Anal Chem* **74**, 5383-5392, doi:10.1021/ac025747h (2002).
- 56 Nesvizhskii, A. I., Keller, A., Kolker, E. & Aebersold, R. A statistical model for identifying proteins by tandem mass spectrometry. *Anal Chem* **75**, 4646-4658, doi:10.1021/ac0341261 (2003).
- 57 Wu, G., Anafi, R. C., Hughes, M. E., Kornacker, K. & Hogenesch, J. B. MetaCycle: an integrated R package to evaluate periodicity in large scale data. *Bioinformatics* **32**, 3351-3353, doi:10.1093/bioinformatics/btw405 (2016).
- 58 Ihaka, R. & Gentleman, R. R: A Language for Data Analysis and Graphics. *Journal of Computational and Graphical Statistics* **5**, 299-314, doi:10.1080/10618600.1996.10474713 (1996).

Chang et al. Figure 1

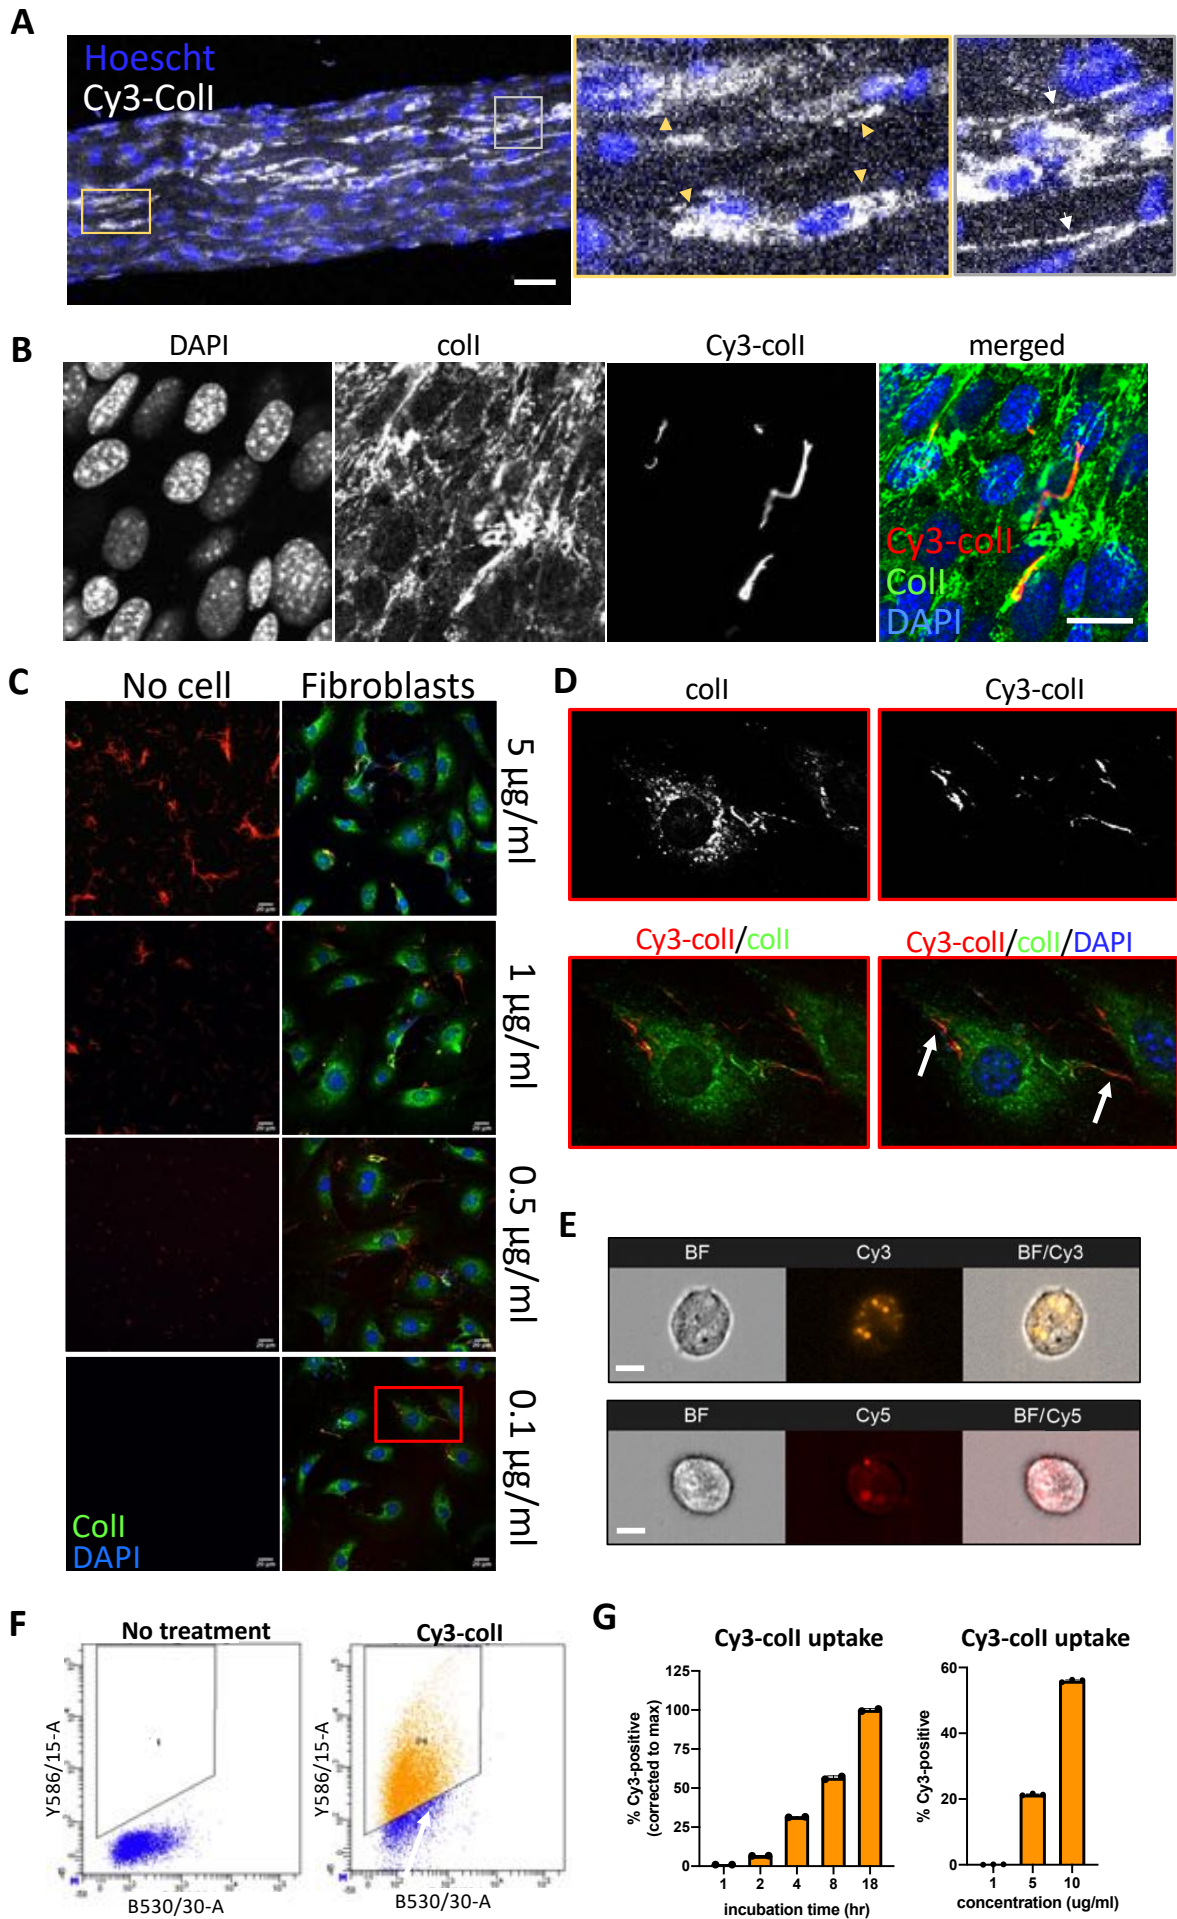

## Chang et al. Figure 2

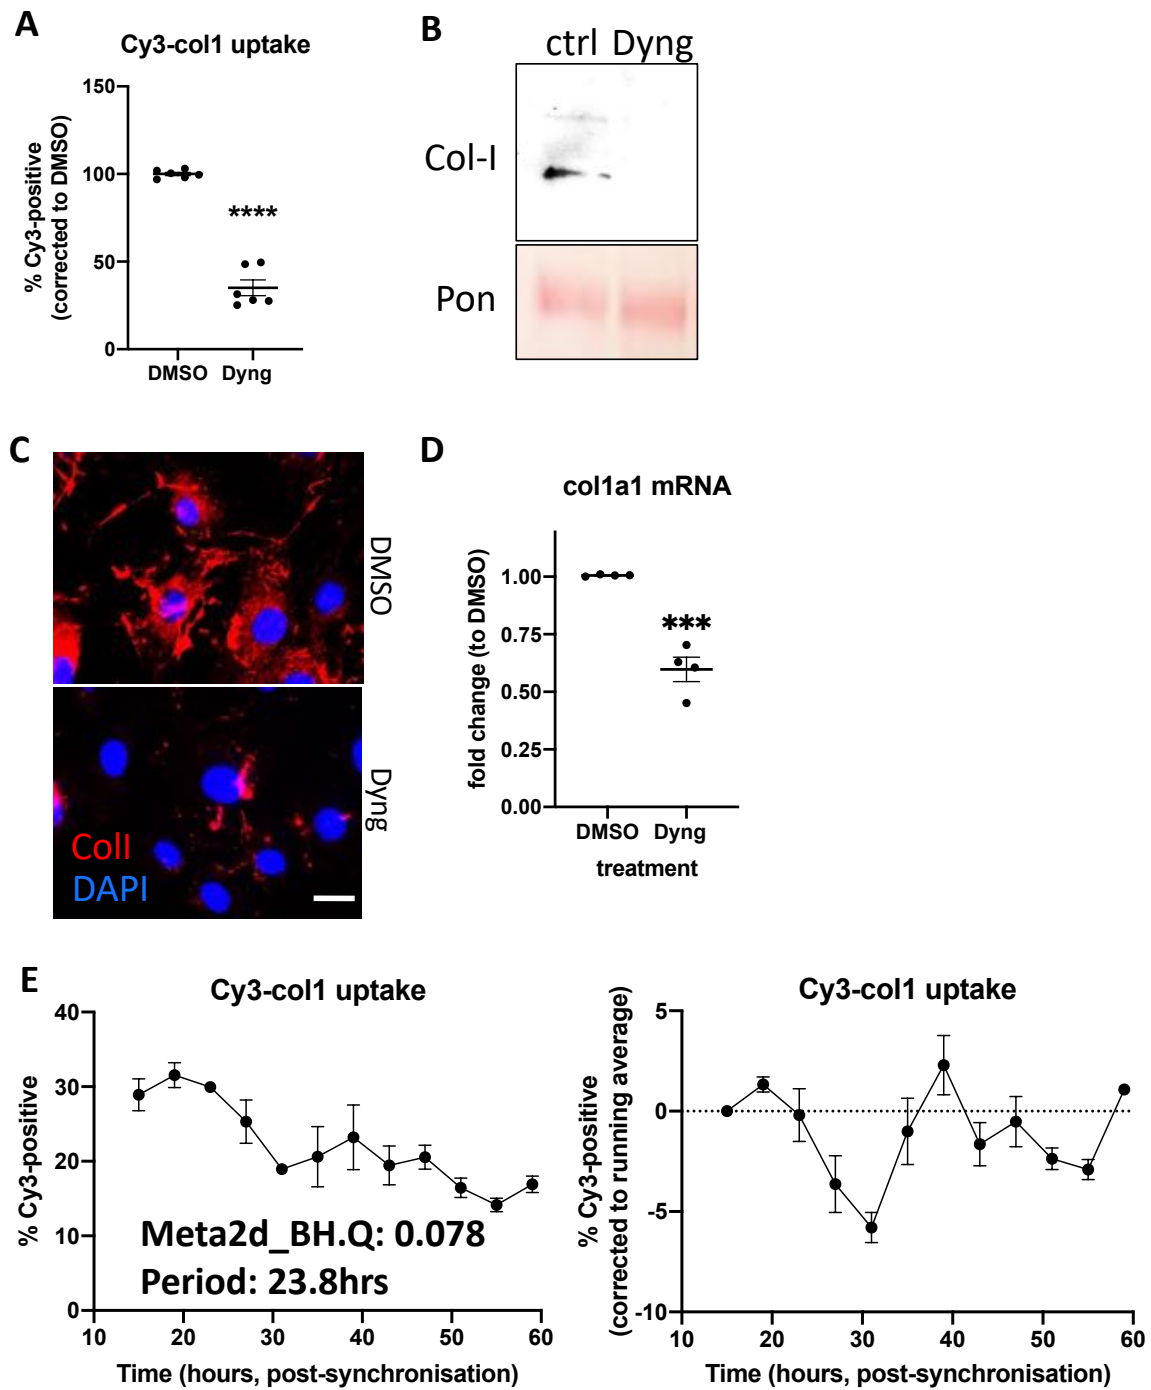



### Chang et al. Figure 3

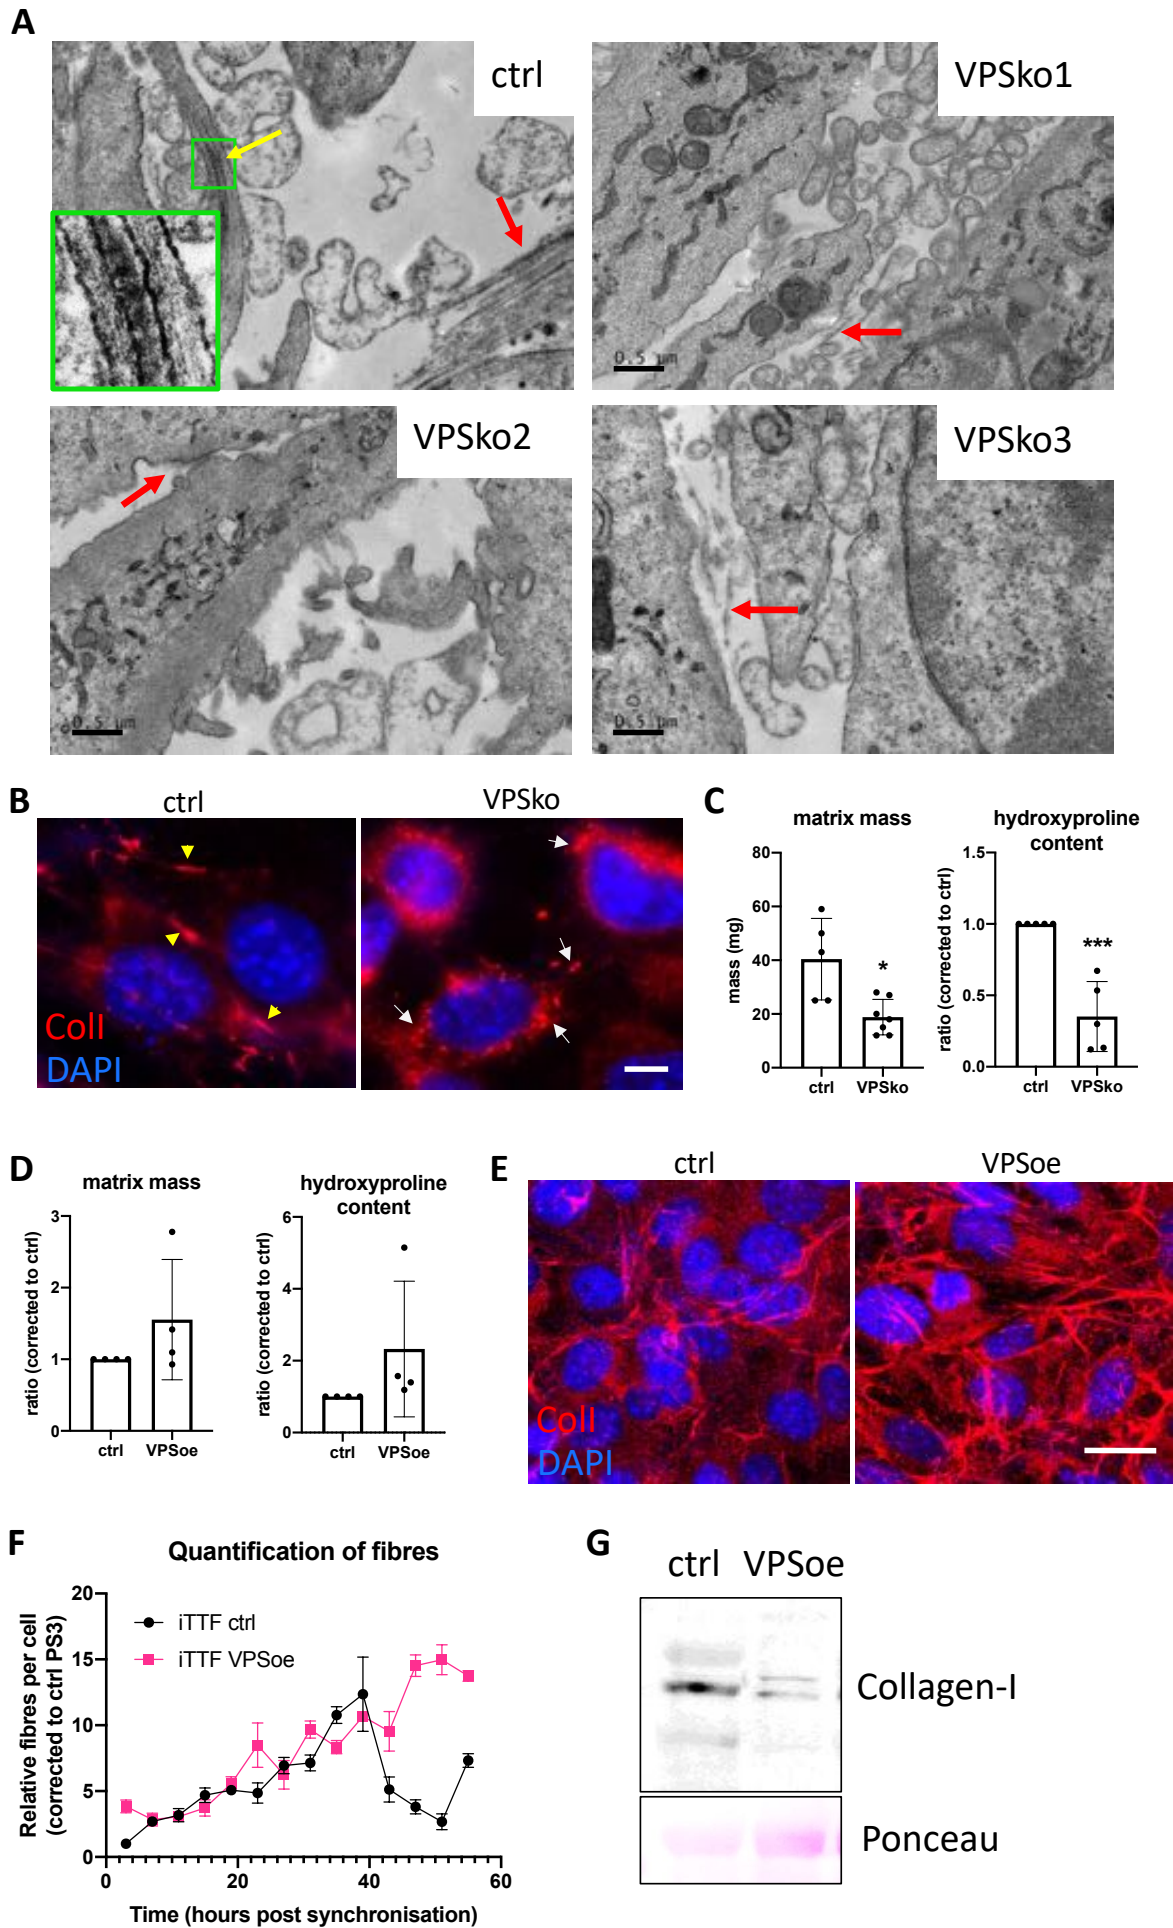



## Chang et al. Figure 4

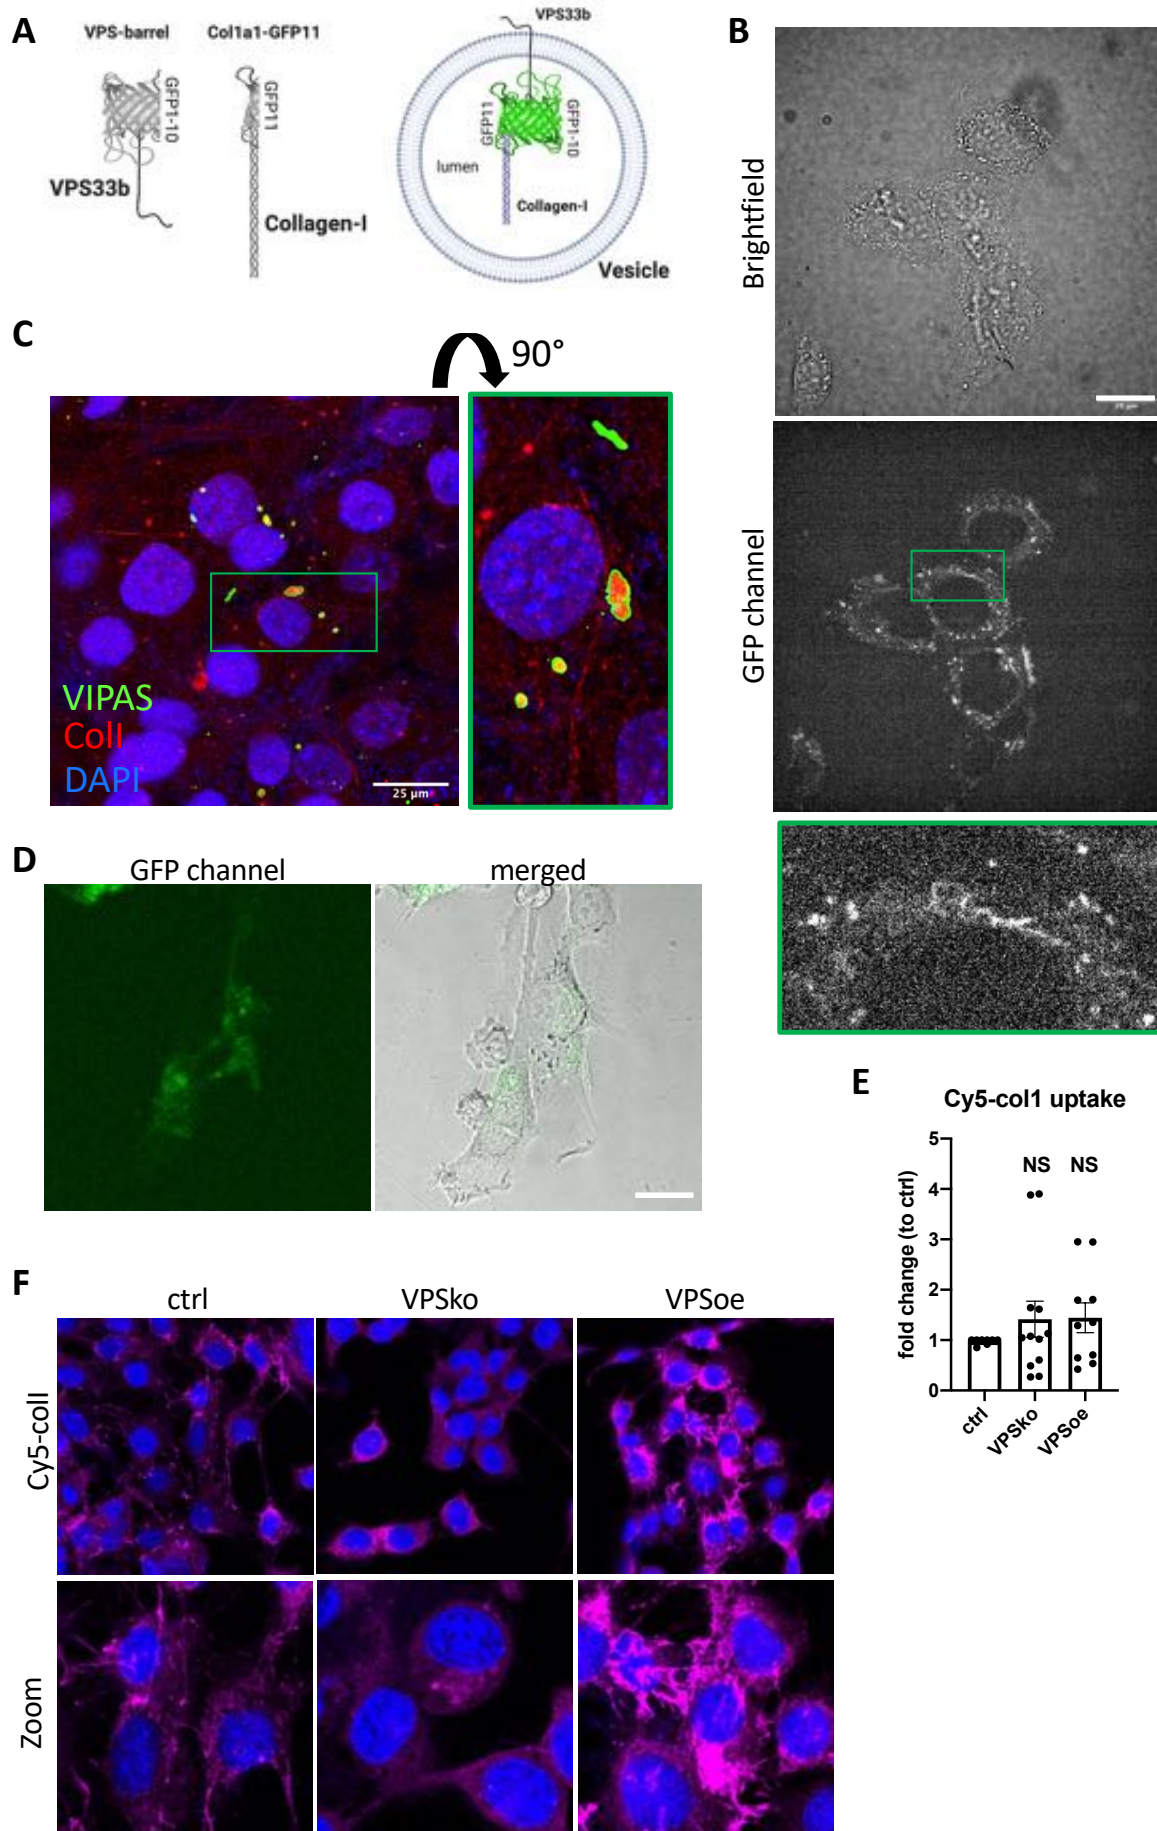

## Chang et al. Figure 5

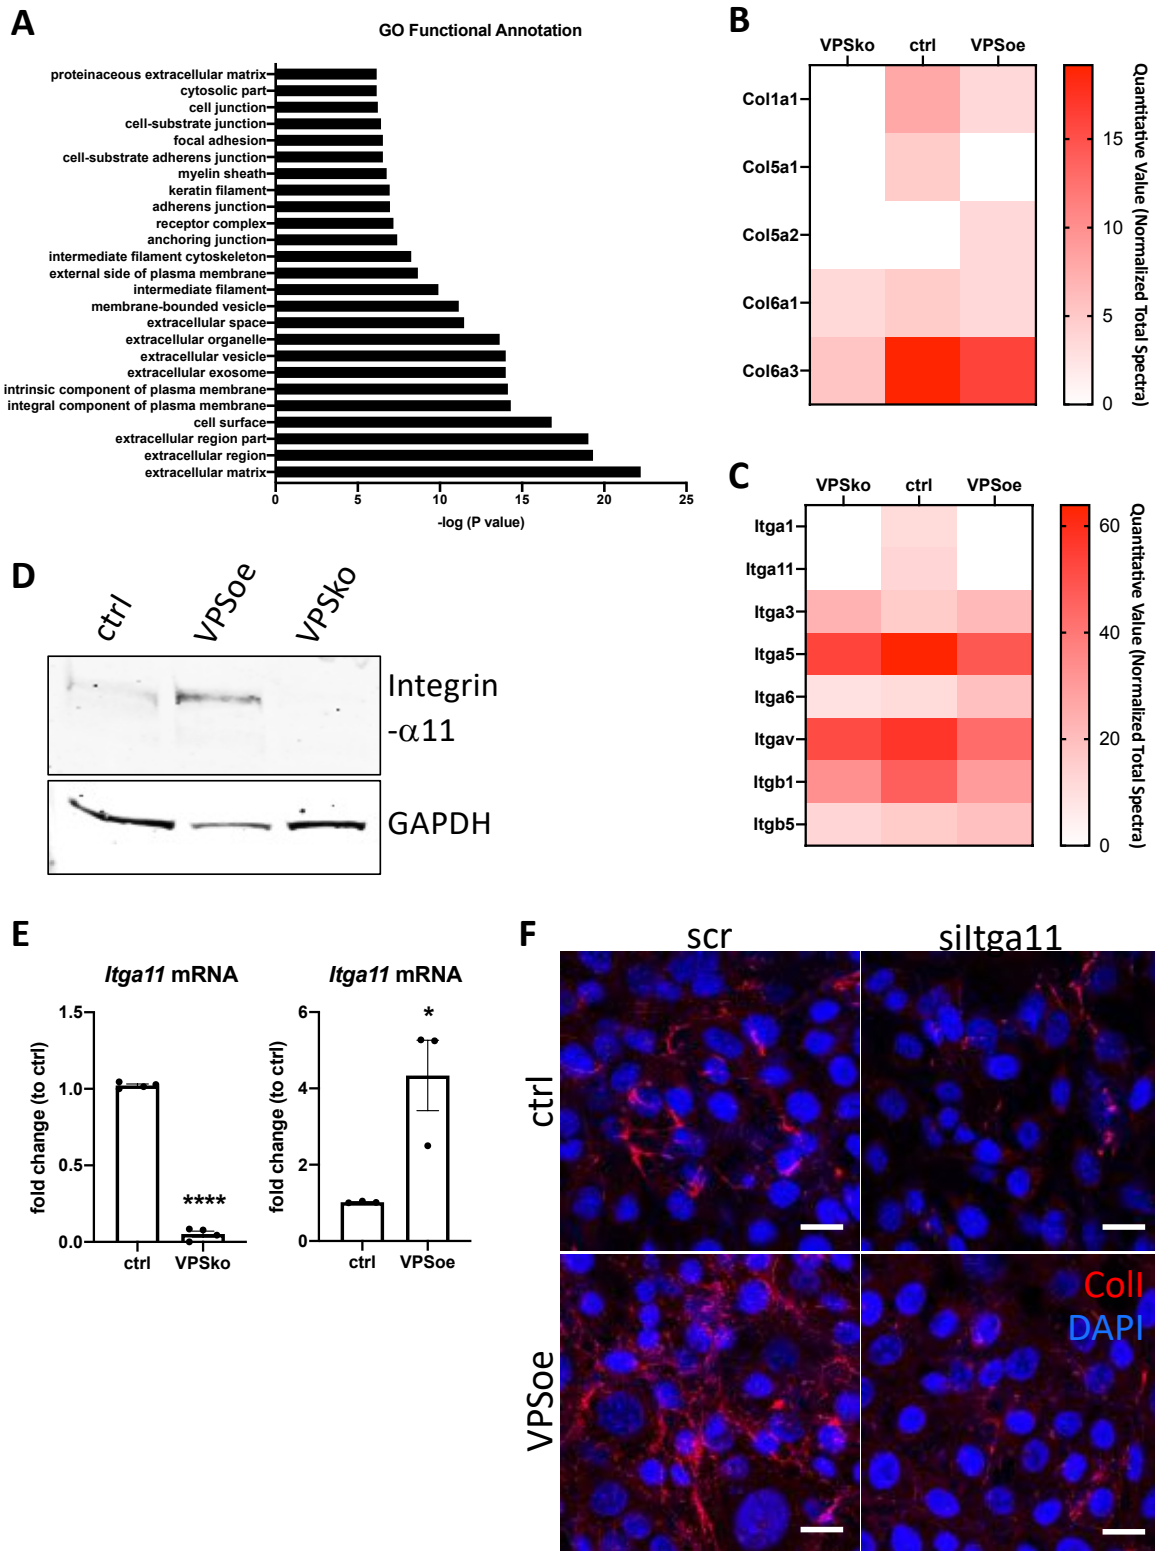

Chang et al. Figure 6

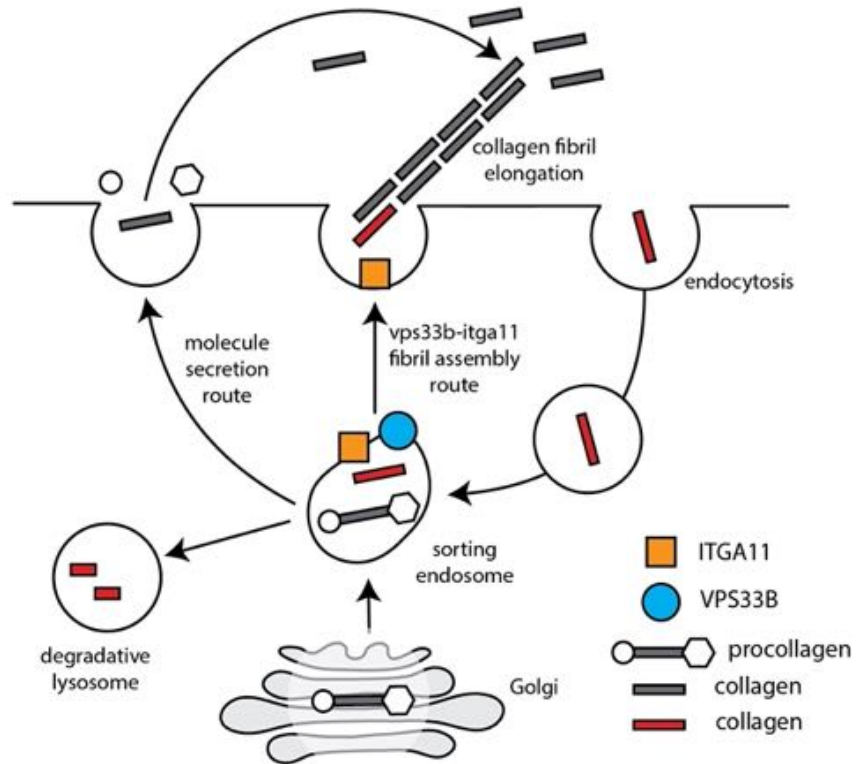

A

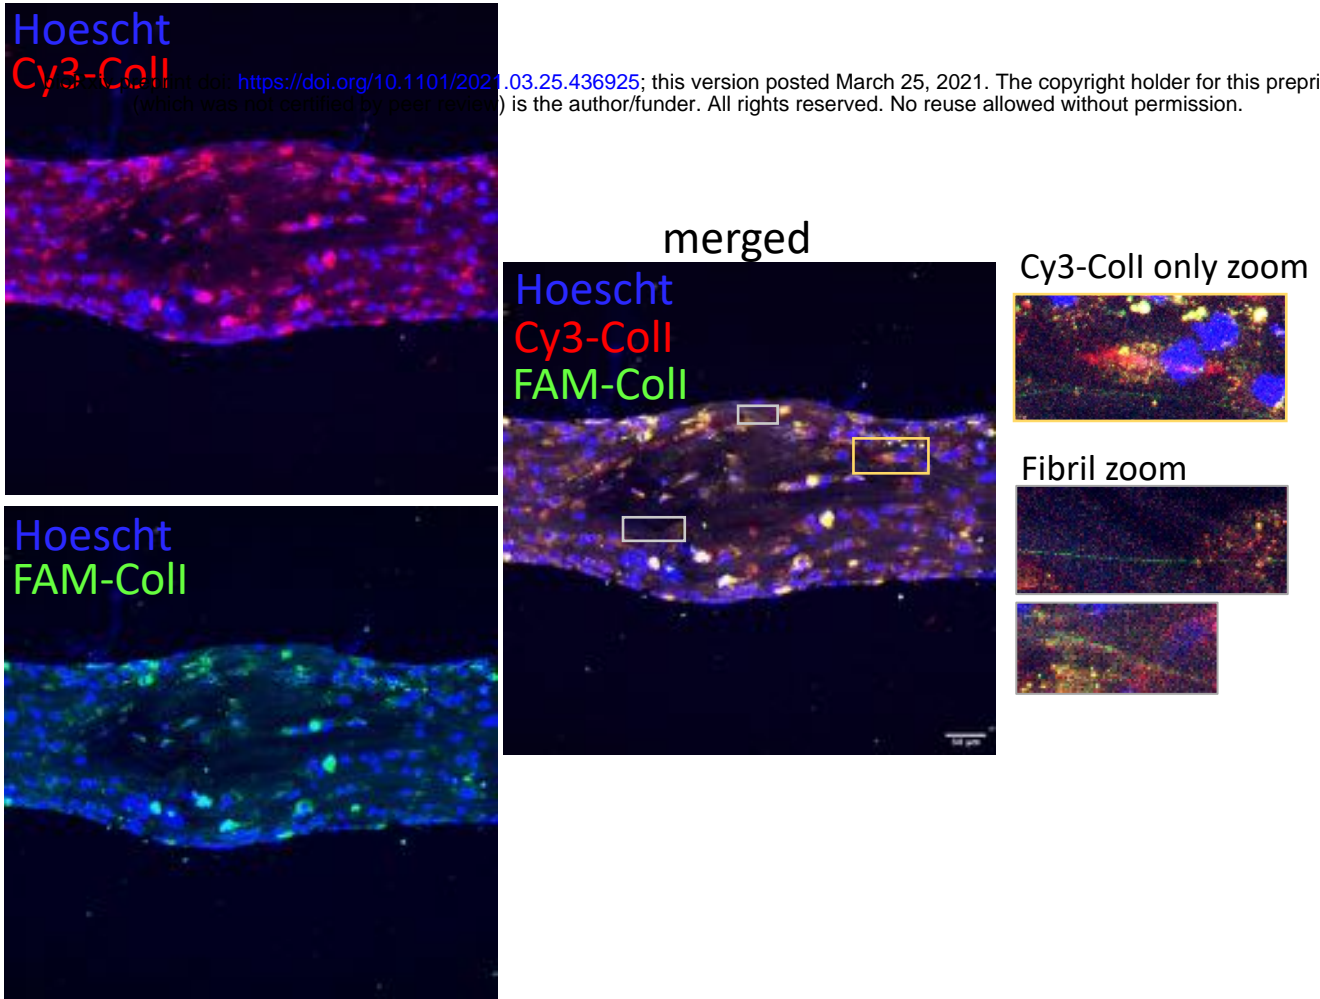

B

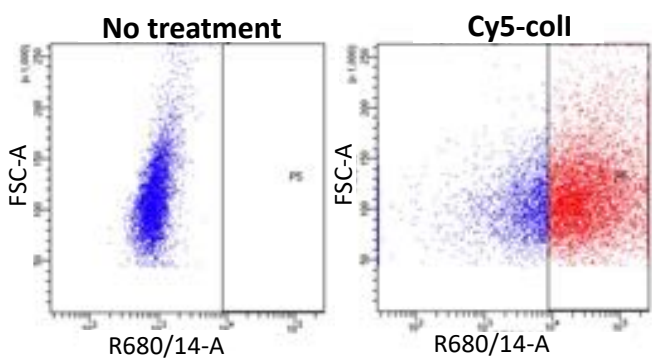

C

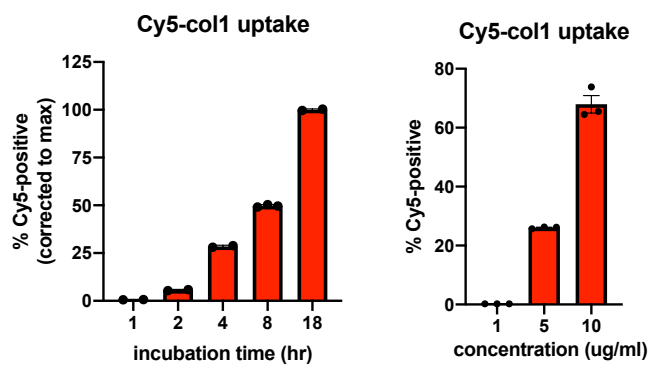

A

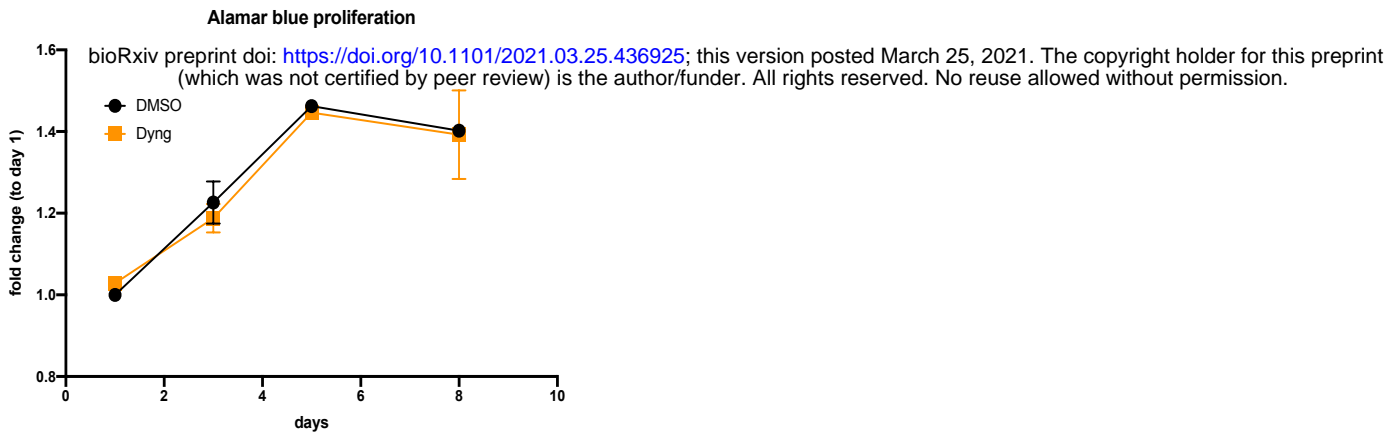B **Fibril count v.s. uptake**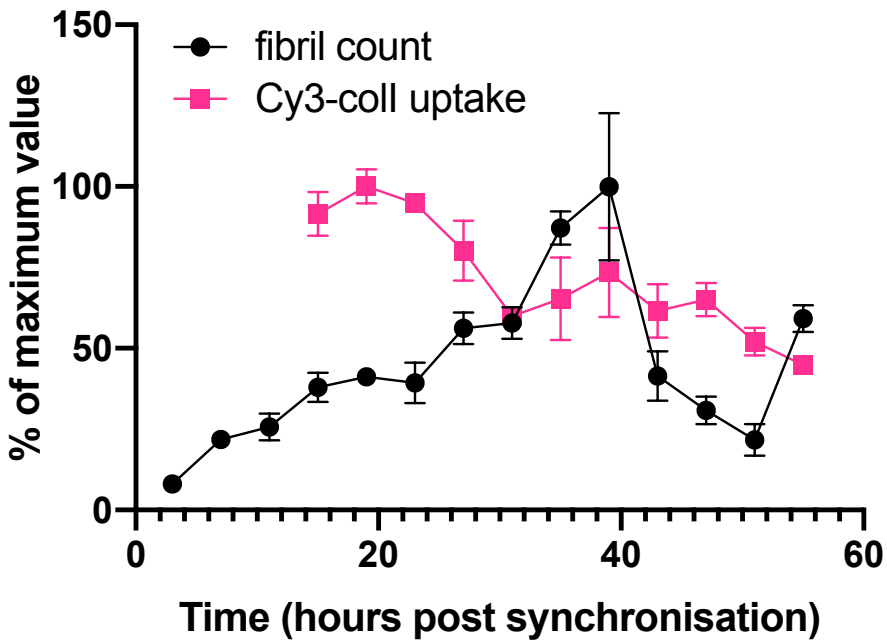



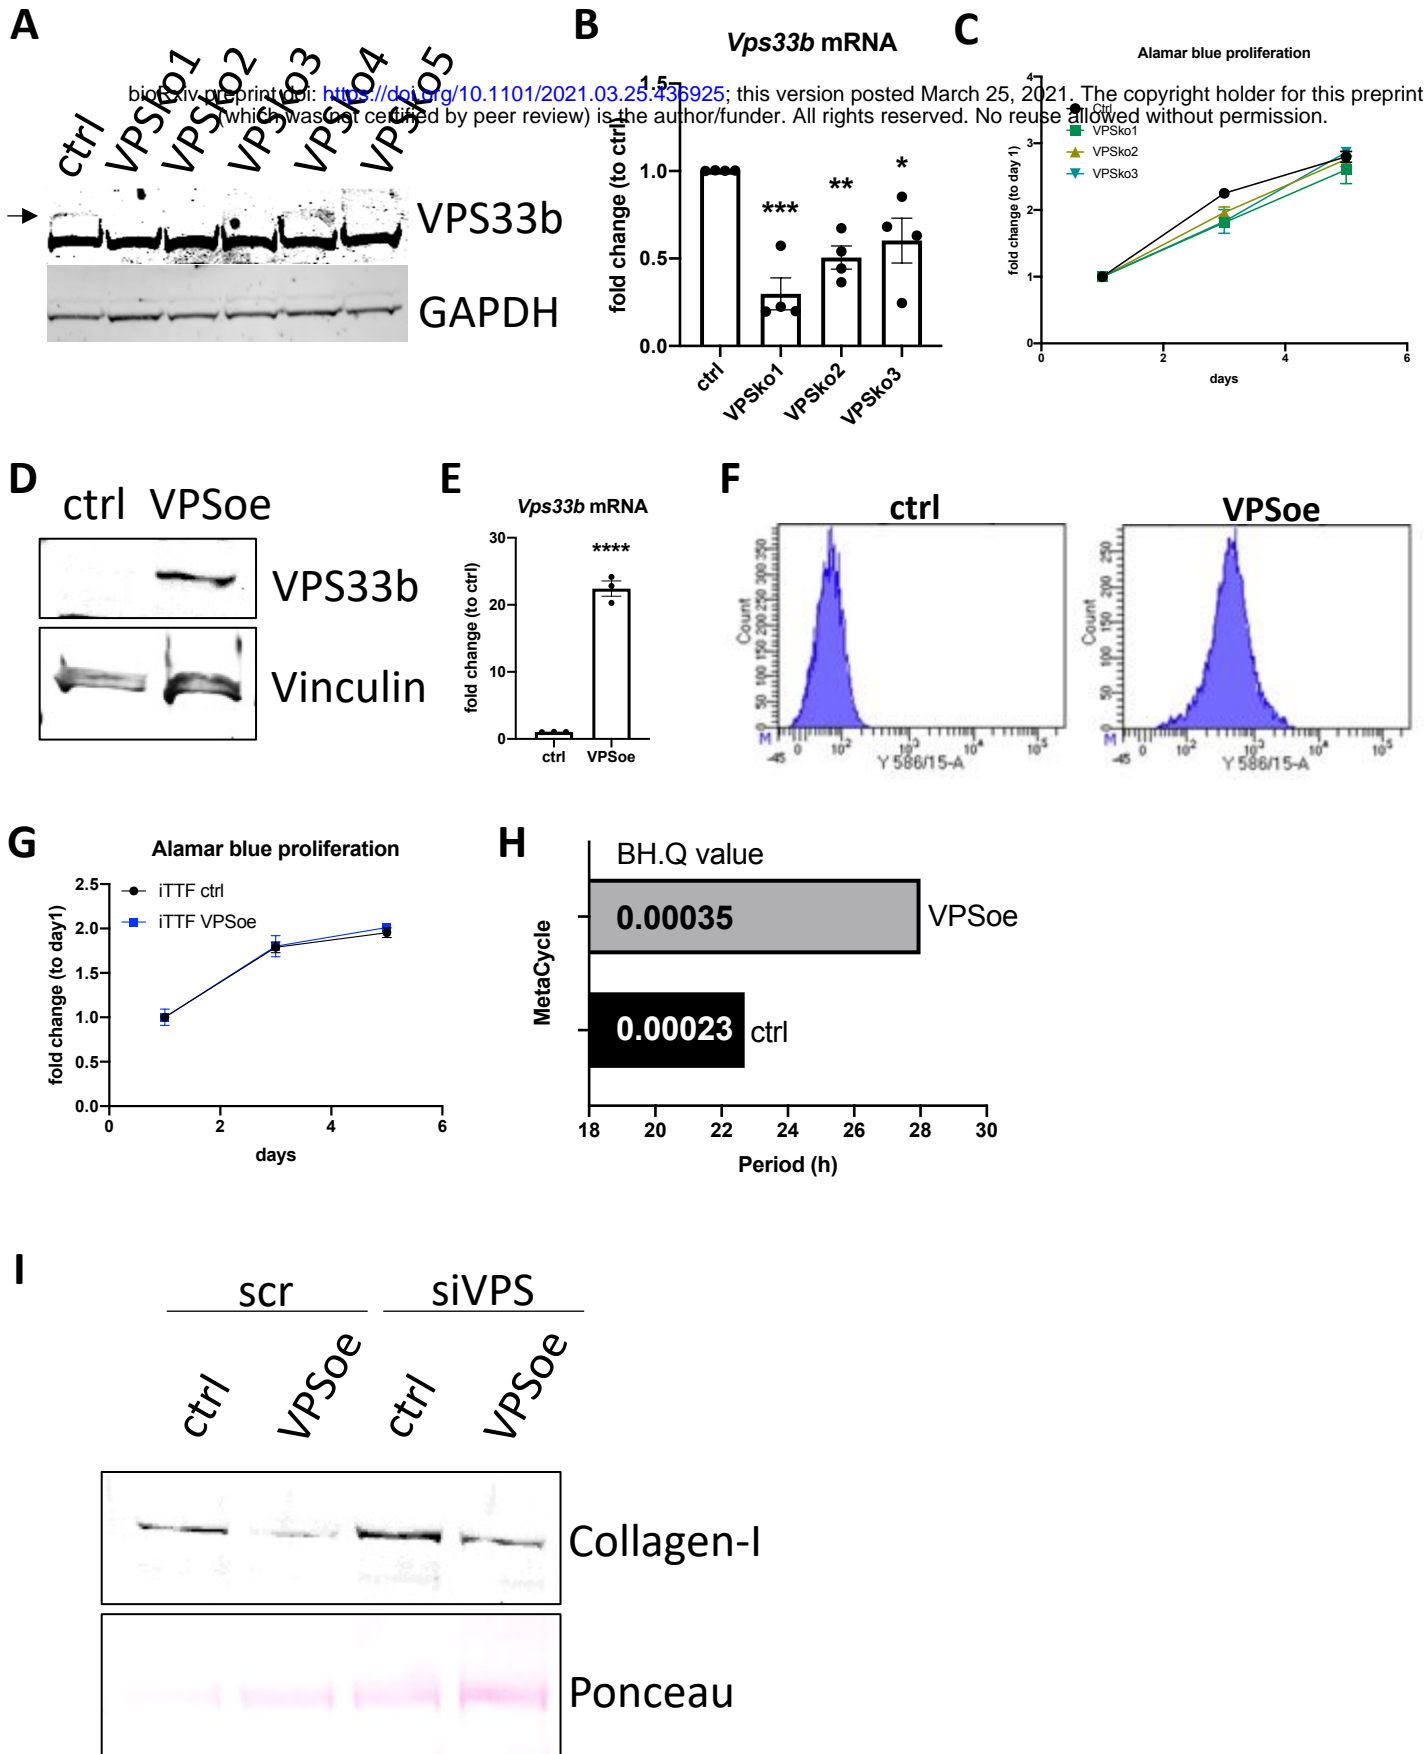

**A**

VPSnBFP

VPScBFP

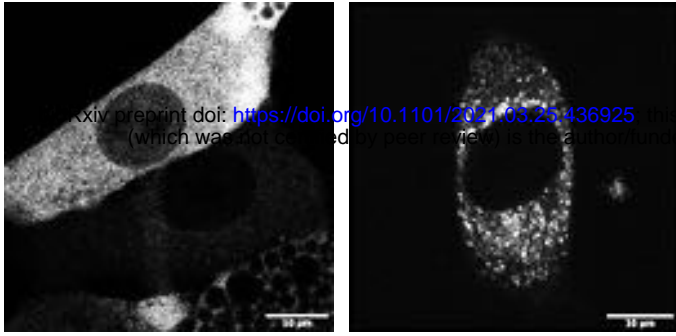

bioRxiv preprint doi: <https://doi.org/10.1101/2021.03.25.436925>; this version posted March 25, 2021. The copyright holder for this preprint (which was not certified by peer review) is the author/funder. All rights reserved. No reuse allowed without permission.

**B**

fibril count

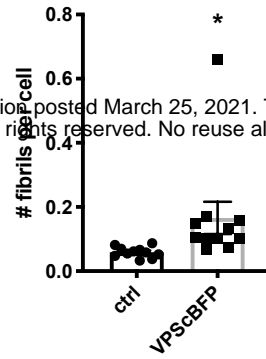

**C**

average fibril length

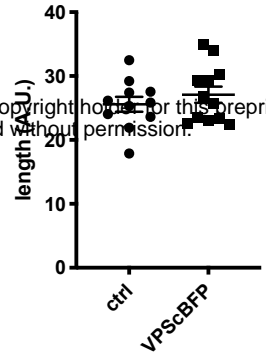

**D**

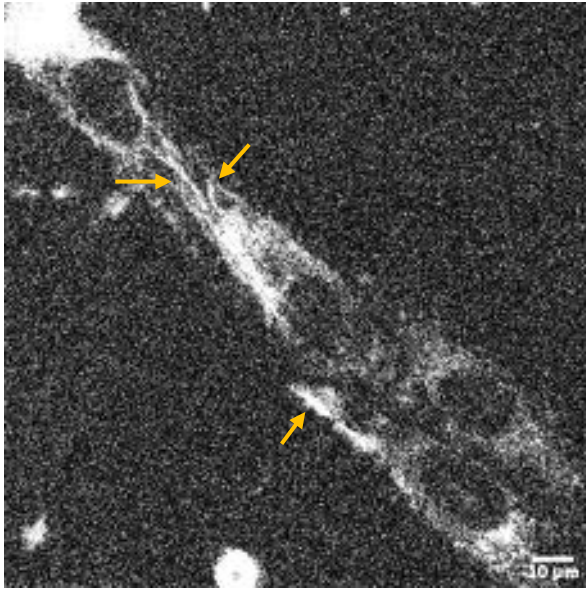

**E**

Cy3-col1 uptake

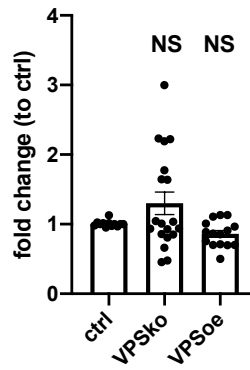

**F**

ctrl

VPSoe

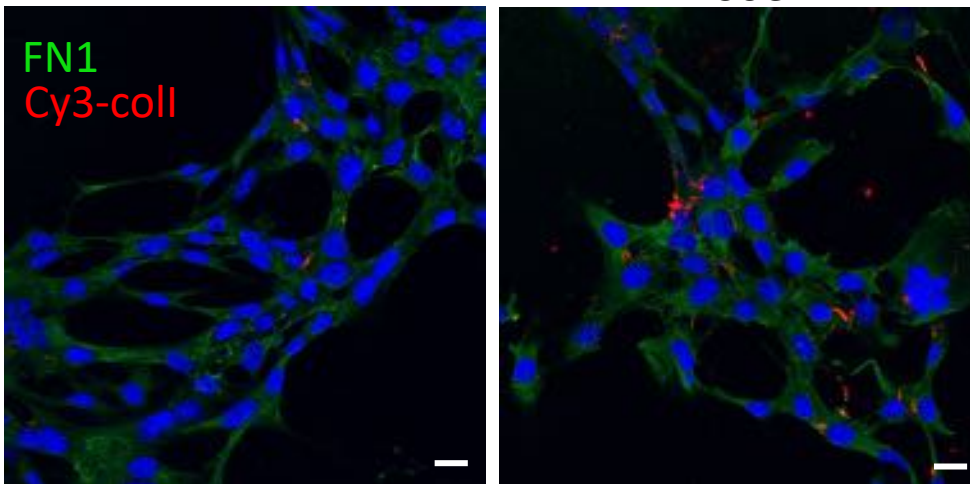

**A**

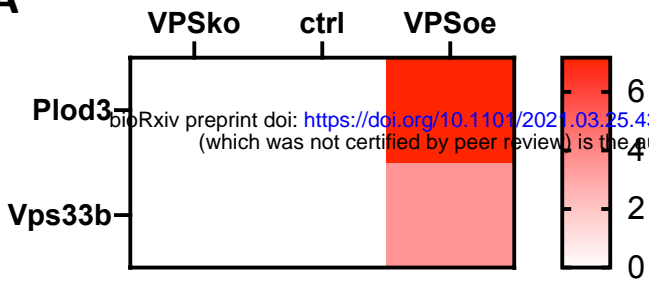

bioRxiv preprint doi: <https://doi.org/10.1101/2021.03.25.436925>; this version posted March 25, 2021. The copyright holder for this preprint (which was not certified by peer review) is the author/funder. All rights reserved. No reuse allowed without permission.

**B**

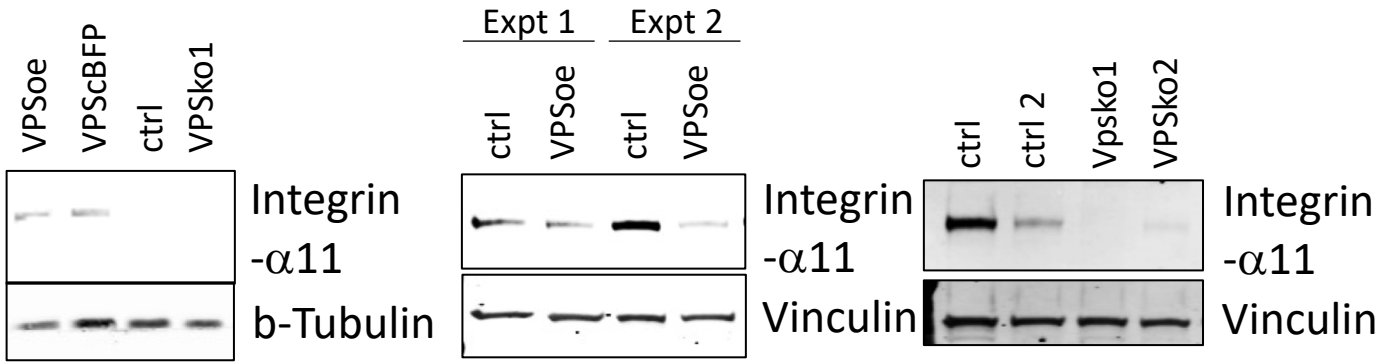

**C**

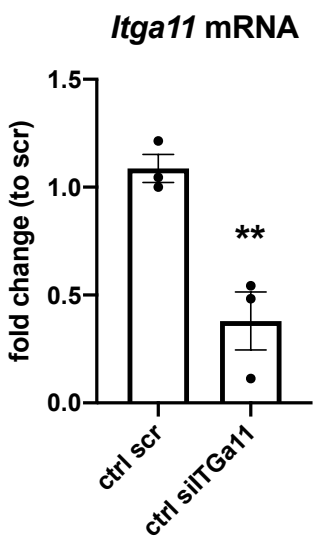

**D**

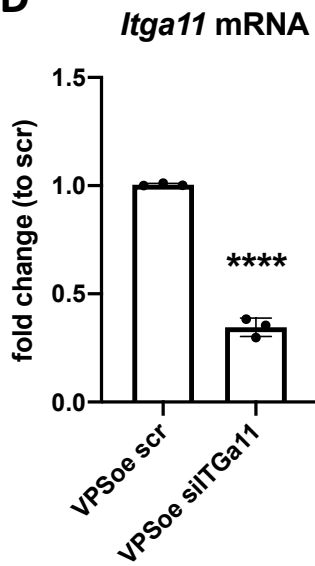

**E**

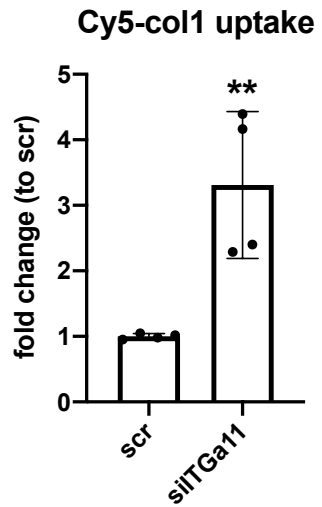

bioRxiv preprint doi: <https://doi.org/10.1101/2021.03.23.436925>; this version posted March 25, 2021. The copyright holder for this preprint (which was not certified by peer review) is the author/funder. All rights reserved. No reuse allowed without permission.

|        | VPSko  | ctrl   | VPSoe  |
|--------|--------|--------|--------|
| Col1a1 | 0      | 0      | 7.1579 |
| Vps33b | 0      | 0      | 3.5789 |
| Col1a1 | 0      | 7.9893 | 3.5789 |
| Col5a1 | 0      | 4.7936 | 0      |
| Col5a2 | 0      | 0      | 3.5789 |
| Col6a1 | 3.6831 | 4.7936 | 3.5789 |
| Col6a3 | 5.5246 | 19.174 | 16.105 |
| Itga1  | 0      | 11.185 | 0      |
| Itga11 | 0      | 12.783 | 0      |
| Itga3  | 23.94  | 15.979 | 21.474 |
| Itga5  | 53.405 | 63.914 | 48.316 |
| Itga6  | 9.2077 | 11.185 | 19.684 |
| Itgav  | 51.563 | 57.523 | 42.947 |
| Itgb1  | 33.148 | 46.338 | 30.421 |
| Itgb5  | 12.891 | 15.979 | 19.684 |

| Identified Proteins (2666)                                                           | Accession Number | Alternate ID | MW      | VPSko-biotin | ctrl-biotin | VPSoe-biotin | ctrl lysate | VPSoe lysate | enriched? |
|--------------------------------------------------------------------------------------|------------------|--------------|---------|--------------|-------------|--------------|-------------|--------------|-----------|
| 1200007D18Rik protein OS=Mus musculus GN=Ergic1 PE=1 SV=1                            | Q4FK22 (+2)      | Ergic1       | 33 kDa  | 5.5246       | 4.7936      | 7.1579       | 0.81665     | 3.8675       | TRUE      |
| 14-3-3 protein epsilon OS=Mus musculus GN=Ywhae PE=1 SV=1                            | P62259 (+1)      | Ywhae        | 29 kDa  | 9.2077       | 4.7936      | 3.5789       | 6.9416      | 6.8755       | TRUE      |
| 14-3-3 protein gamma subtype OS=Mus musculus GN=Ywhag PE=1 SV=1                      | A8IP69 (+1)      | Ywhag        | 28 kDa  | 9.2077       | 0           | 7.1579       | 0           | 3.4377       | TRUE      |
| 14-3-3 protein zeta/delta OS=Mus musculus GN=Ywhaz PE=1 SV=1                         | P63101           | Ywhaz        | 28 kDa  | 9.2077       | 9.5872      | 8.9474       | 4.8999      | 6.0161       | TRUE      |
| 2-oxoglutarate dehydrogenase, mitochondrial OS=Mus musculus GN=Ogdh PE=1 SV=3        | Q60597           | Ogdh         | 116 kDa | 0            | 3.1957      | 8.9474       | 7.7582      | 8.1647       | TRUE      |
| 26S proteasome non-ATPase regulatory subunit 5 OS=Mus musculus GN=Psmd5 PE=1 SV=4    | Q8BJY1           | Psmd5        | 56 kDa  | 3.6831       | 3.1957      | 3.5789       | 3.6749      | 3.4377       | TRUE      |
| 26S proteasome non-ATPase regulatory subunit 9 OS=Mus musculus GN=Psmd9 PE=1 SV=1    | Q9CR00 (+1)      | Psmd9        | 25 kDa  | 5.5246       | 4.7936      | 7.1579       | 2.45        | 2.5783       | TRUE      |
| 26S proteasome regulatory subunit 10B OS=Mus musculus GN=Psmc6 PE=1 SV=1             | P62334 (+1)      | Psmc6        | 44 kDa  | 5.5246       | 3.1957      | 5.3684       | 4.8999      | 3.8675       | TRUE      |
| 26S proteasome regulatory subunit 6A OS=Mus musculus GN=Psmc3 PE=1 SV=1              | B7ZCF1           | Psmc3        | 50 kDa  | 7.3662       | 4.7936      | 7.1579       | 5.7166      | 4.7269       | TRUE      |
| 26S proteasome regulatory subunit 7 OS=Mus musculus GN=Psmc2 PE=1 SV=1               | Q8BVQ9           | Psmc2        | 53 kDa  | 3.6831       | 3.1957      | 5.3684       | 4.8999      | 4.2972       | TRUE      |
| 40S ribosomal protein S12 OS=Mus musculus GN=Rps12-ps3 PE=1 SV=1                     | Q6ZWZ6           | Rps12-ps3    | 15 kDa  | 3.6831       | 6.3914      | 5.3684       | 4.4916      | 3.4377       | TRUE      |
| 40S ribosomal protein S13 OS=Mus musculus GN=Rps13 PE=1 SV=2                         | P62301 (+2)      | Rps13        | 17 kDa  | 14.732       | 14.381      | 16.105       | 6.5332      | 3.008        | TRUE      |
| 40S ribosomal protein S15a OS=Mus musculus GN=Rps15a PE=1 SV=2                       | P62245 (+1)      | Rps15a       | 15 kDa  | 9.2077       | 4.7936      | 7.1579       | 4.0833      | 4.2972       | TRUE      |
| 40S ribosomal protein S17 OS=Mus musculus GN=Rps17 PE=1 SV=2                         | P63276 (+2)      | Rps17        | 16 kDa  | 5.5246       | 0           | 0            | 3.6749      | 4.7269       | TRUE      |
| 40S ribosomal protein S20 OS=Mus musculus GN=Rps20 PE=1 SV=1                         | P60867 (+1)      | Rps20        | 13 kDa  | 3.6831       | 0           | 5.3684       | 2.0416      | 2.5783       | TRUE      |
| 40S ribosomal protein S21 OS=Mus musculus GN=mCG_6739 PE=2 SV=1                      | Q8C1L7 (+1)      | mCG_6739     | 9 kDa   | 5.5246       | 4.7936      | 0            | 1.225       | 0            | TRUE      |
| 40S ribosomal protein S25 OS=Mus musculus GN=Rps25 PE=1 SV=1                         | A0A1L1SQA8 (+2)  | Rps25        | 10 kDa  | 9.2077       | 7.9893      | 10.737       | 1.6333      | 2.5783       | TRUE      |
| 40S ribosomal protein S27 OS=Mus musculus GN=Rps27 PE=1 SV=3                         | Q6ZWU9           | Rps27        | 9 kDa   | 14.732       | 11.185      | 8.9474       | 2.45        | 2.5783       | TRUE      |
| 40S ribosomal protein S27-like OS=Mus musculus GN=Rps27I PE=1 SV=3                   | Q6ZWY3           | Rps27I       | 9 kDa   | 0            | 7.9893      | 0            | 0           | 0            | TRUE      |
| 40S ribosomal protein S28 (Fragment) OS=Mus musculus GN=Rps28 PE=1 SV=1              | G3UYV7 (+2)      | Rps28        | 6 kDa   | 5.5246       | 4.7936      | 5.3684       | 1.6333      | 2.1486       | TRUE      |
| 40S ribosomal protein S3 OS=Mus musculus GN=Rps3 PE=1 SV=1                           | P62908 (+1)      | Rps3         | 27 kDa  | 25.782       | 15.979      | 28.632       | 12.25       | 12.892       | TRUE      |
| 40S ribosomal protein S3a OS=Mus musculus GN=Rps3a1 PE=2 SV=1                        | Q9D1S3           | Rps3a1       | 30 kDa  | 18.415       | 14.381      | 17.895       | 6.9416      | 9.0241       | TRUE      |
| 40S ribosomal protein S4, X isoform OS=Mus musculus GN=Rps4x PE=1 SV=2               | P62702 (+2)      | Rps4x        | 30 kDa  | 12.891       | 12.783      | 12.526       | 7.7582      | 8.1647       | TRUE      |
| 40S ribosomal protein S5 OS=Mus musculus GN=Rps5 PE=1 SV=1                           | Q91V55           | Rps5         | 23 kDa  | 3.6831       | 6.3914      | 5.3684       | 3.6749      | 3.4377       | TRUE      |
| 40S ribosomal protein S7 OS=Mus musculus GN=Gm9493 PE=3 SV=1                         | F6SVV1 (+2)      | Gm9493       | 22 kDa  | 11.049       | 4.7936      | 7.1579       | 3.2666      | 3.4377       | TRUE      |
| 40S ribosomal protein S8 OS=Mus musculus GN=Rps8 PE=1 SV=2                           | P62242 (+1)      | Rps8         | 24 kDa  | 9.2077       | 4.7936      | 8.9474       | 6.9416      | 8.1647       | TRUE      |
| 45 kDa calcium-binding protein OS=Mus musculus GN=Sdf4 PE=1 SV=1                     | Q61112           | Sdf4         | 42 kDa  | 5.5246       | 6.3914      | 3.5789       | 0           | 0            | TRUE      |
| 4F2 cell-surface antigen heavy chain OS=Mus musculus GN=Slc3a2 PE=1 SV=1             | P10852           | Slc3a2       | 58 kDa  | 36.831       | 31.957      | 28.632       | 6.9416      | 4.2972       | TRUE      |
| 5'-3' exoribonuclease 2 OS=Mus musculus GN=Xrn2 PE=1 SV=1                            | Q9DBR1           | Xrn2         | 109 kDa | 3.6831       | 0           | 3.5789       | 3.6749      | 3.008        | TRUE      |
| 5'-nucleotidase domain-containing 2 OS=Mus musculus GN=Nt5dc2 PE=1 SV=1              | Q91X76           | Nt5dc2       | 46 kDa  | 0            | 0           | 3.5789       | 3.6749      | 3.4377       | TRUE      |
| 60 kDa heat shock protein, mitochondrial OS=Mus musculus GN=Hspd1 PE=1 SV=1          | P63038           | Hspd1        | 61 kDa  | 42.356       | 41.544      | 50.105       | 17.558      | 19.337       | TRUE      |
| 60S acidic ribosomal protein P0 OS=Mus musculus GN=Rplp0 PE=1 SV=3                   | P14869 (+1)      | Rplp0        | 34 kDa  | 18.415       | 17.576      | 14.316       | 6.1249      | 7.3052       | TRUE      |
| 60S acidic ribosomal protein P2 OS=Mus musculus GN=Rplp2 PE=1 SV=3                   | P99027           | Rplp2        | 12 kDa  | 9.2077       | 7.9893      | 8.9474       | 3.6749      | 3.008        | TRUE      |
| 60S ribosomal protein L12 OS=Mus musculus GN=Rpl12 PE=1 SV=2                         | P35979 (+1)      | Rpl12        | 18 kDa  | 5.5246       | 7.9893      | 7.1579       | 3.6749      | 5.1566       | TRUE      |
| 60S ribosomal protein L17 OS=Mus musculus GN=Rpl17 PE=1 SV=1                         | Q6ZWZ7 (+2)      | Rpl17        | 21 kDa  | 9.2077       | 7.9893      | 8.9474       | 2.45        | 3.008        | TRUE      |
| 60S ribosomal protein L21 OS=Mus musculus GN=Rpl21 PE=1 SV=3                         | O09167 (+1)      | Rpl21        | 19 kDa  | 7.3662       | 3.1957      | 0            | 2.0416      | 2.5783       | TRUE      |
| 60S ribosomal protein L22 OS=Mus musculus GN=Rpl22 PE=1 SV=2                         | P67984 (+1)      | Rpl22        | 15 kDa  | 5.5246       | 3.1957      | 5.3684       | 3.2666      | 3.8675       | TRUE      |
| 60S ribosomal protein L23 OS=Mus musculus GN=Rpl23 PE=1 SV=1                         | P62830           | Rpl23        | 15 kDa  | 5.5246       | 3.1957      | 0            | 2.45        | 2.5783       | TRUE      |
| 60S ribosomal protein L26 OS=Mus musculus GN=Rpl26 PE=1 SV=1                         | P61255 (+1)      | Rpl26        | 17 kDa  | 3.6831       | 3.1957      | 5.3684       | 2.8583      | 3.4377       | TRUE      |
| 60S ribosomal protein L27 OS=Mus musculus GN=Rpl27 PE=1 SV=2                         | P61358 (+1)      | Rpl27        | 16 kDa  | 3.6831       | 4.7936      | 5.3684       | 2.0416      | 2.1486       | TRUE      |
| 60S ribosomal protein L30 OS=Mus musculus GN=Rpl30 PE=1 SV=2                         | P62889 (+1)      | Rpl30        | 13 kDa  | 11.049       | 4.7936      | 3.5789       | 2.45        | 3.008        | TRUE      |
| 60S ribosomal protein L34 OS=Mus musculus GN=Rpl34 PE=1 SV=2                         | Q9D1R9           | Rpl34        | 13 kDa  | 3.6831       | 0           | 0            | 0.81665     | 0            | TRUE      |
| 60S ribosomal protein L35a OS=Mus musculus GN=Rpl35a PE=1 SV=2                       | O55142 (+3)      | Rpl35a       | 13 kDa  | 5.5246       | 3.1957      | 5.3684       | 1.6333      | 0.85944      | TRUE      |
| 60S ribosomal protein L5 OS=Mus musculus GN=Rpl5 PE=1 SV=3                           | P47962 (+1)      | Rpl5         | 34 kDa  | 12.891       | 9.5872      | 12.526       | 11.841      | 14.181       | TRUE      |
| 60S ribosomal protein L9 (Fragment) OS=Mus musculus GN=Rpl9 PE=1 SV=1                | A0A0G2JES3 (+2)  | Rpl9         | 22 kDa  | 3.6831       | 0           | 3.5789       | 3.2666      | 3.4377       | TRUE      |
| 78 kDa glucose-regulated protein OS=Mus musculus GN=Hspa5 PE=1 SV=3                  | P20029 (+1)      | Hspa5        | 72 kDa  | 51.563       | 57.523      | 53.684       | 28.175      | 29.651       | TRUE      |
| A kinase (PRKA) anchor protein 8 OS=Mus musculus GN=Akap8 PE=1 SV=1                  | Q059U9 (+1)      | Akap8        | 76 kDa  | 9.2077       | 4.7936      | 5.3684       | 1.225       | 1.2892       | TRUE      |
| Abl interactor 1 OS=Mus musculus GN=Abi1 PE=1 SV=1                                   | B7ZCU0 (+2)      | Abi1         | 52 kDa  | 5.5246       | 4.7936      | 0            | 1.6333      | 0.85944      | TRUE      |
| Acetyl-CoA acetyltransferase, mitochondrial OS=Mus musculus GN=Acat1 PE=1 SV=1       | Q8QZT1           | Acat1        | 45 kDa  | 5.5246       | 0           | 5.3684       | 4.0833      | 5.5863       | TRUE      |
| Acetyl-CoA carboxylase 1 OS=Mus musculus GN=Acaca PE=1 SV=1                          | Q5SWU9           | Acaca        | 265 kDa | 167.58       | 135.82      | 166.42       | 7.7582      | 6.0161       | TRUE      |
| Acid sphingomyelinase-like phosphodiesterase 3b OS=Mus musculus GN=Smpdl3b PE=1 SV=1 | P58242 (+1)      | Smpdl3b      | 52 kDa  | 0            | 4.7936      | 0            | 1.225       | 0            | TRUE      |



| Identified Proteins (2666)                                                                    | Accession Number | Alternate ID | MW      | VPSko-biotin | ctrl-biotin | VPSoe-biotin | ctrl lysate | VPSoe lysate | enriched? |
|-----------------------------------------------------------------------------------------------|------------------|--------------|---------|--------------|-------------|--------------|-------------|--------------|-----------|
| Aconitate hydratase, mitochondrial OS=Mus musculus GN=Aco2 PE=1 SV=1                          | Q99KI0           | Aco2         | 85 kDa  | 9.2077       | 12.783      | 14.316       | 10.208      | 12.462       | TRUE      |
| Actin-related protein 2/3 complex subunit 5 OS=Mus musculus GN=Arpc5 PE=2 SV=1                | Q3TKM9 (+1)      | Arpc5        | 16 kDa  | 0            | 3.1957      | 0            | 1.6333      | 0            | TRUE      |
| Actin-related protein 2/3 complex subunit OS=Mus musculus GN=Arpc1b PE=2 SV=1                 | Q3TCE7 (+3)      | Arpc1b       | 41 kDa  | 7.3662       | 4.7936      | 5.3684       | 6.1249      | 4.7269       | TRUE      |
| Actin, alpha cardiac muscle 1 OS=Mus musculus GN=Actc1 PE=1 SV=1                              | P68033 (+2)      | Actc1        | 42 kDa  | 40.514       | 44.74       | 50.105       | 45.324      | 38.245       | TRUE      |
| Actin, beta OS=Mus musculus GN=Actb PE=2 SV=1                                                 | B2RRX1 (+5)      | Actb         | 42 kDa  | 51.563       | 63.914      | 69.789       | 67.782      | 67.896       | TRUE      |
| Acyl-coenzyme A thioesterase 9, mitochondrial OS=Mus musculus GN=Acot9 PE=1 SV=1              | Q9R0X4           | Acot9        | 51 kDa  | 0            | 3.1957      | 3.5789       | 2.8583      | 4.2972       | TRUE      |
| Adenosylhomocysteinase OS=Mus musculus GN=Ahcy PE=1 SV=3                                      | P50247 (+2)      | Ahcy         | 48 kDa  | 5.5246       | 4.7936      | 10.737       | 9.3915      | 9.8835       | TRUE      |
| Adenylyl cyclase-associated protein 1 OS=Mus musculus GN=Cap1 PE=1 SV=4                       | P40124 (+1)      | Cap1         | 52 kDa  | 0            | 11.185      | 5.3684       | 10.208      | 9.0241       | TRUE      |
| ADP-ribosylation factor 3 OS=Mus musculus GN=Arf3 PE=2 SV=2                                   | P61205 (+2)      | Arf3         | 21 kDa  | 0            | 4.7936      | 3.5789       | 4.8999      | 4.7269       | TRUE      |
| ADP-ribosylation factor 4 OS=Mus musculus GN=Arf4 PE=1 SV=2                                   | P61750 (+1)      | Arf4         | 20 kDa  | 5.5246       | 3.1957      | 3.5789       | 5.3082      | 5.1566       | TRUE      |
| ADP-ribosylation factor GTPase-activating protein 3 OS=Mus musculus GN=Arfgap3 PE=1 SV=1      | A0A0R4J0T8 (+1)  | Arfgap3      | 58 kDa  | 0            | 0           | 3.5789       | 3.2666      | 4.2972       | TRUE      |
| ADP-ribosylation factor-like protein 1 (Fragment) OS=Mus musculus GN=Arl1 PE=1 SV=1           | F8WIB1 (+2)      | Arl1         | 16 kDa  | 0            | 3.1957      | 0            | 2.45        | 1.7189       | TRUE      |
| ADP/ATP translocase 1 OS=Mus musculus GN=Slc25a4 PE=1 SV=4                                    | P48962 (+1)      | Slc25a4      | 33 kDa  | 40.514       | 31.957      | 39.368       | 10.616      | 12.892       | TRUE      |
| ADP/ATP translocase 2 OS=Mus musculus GN=Slc25a5 PE=1 SV=3                                    | P51881 (+1)      | Slc25a5      | 33 kDa  | 53.405       | 39.947      | 46.526       | 11.025      | 12.892       | TRUE      |
| AHNAK nucleoprotein (desmoyokin) OS=Mus musculus GN=Ahnak PE=1 SV=1                           | E9Q616           | Ahnak        | 604 kDa | 44.197       | 39.947      | 37.579       | 39.199      | 36.526       | TRUE      |
| Aldehyde dehydrogenase, mitochondrial OS=Mus musculus GN=Aldh2 PE=1 SV=1                      | P47738 (+3)      | Aldh2        | 57 kDa  | 7.3662       | 4.7936      | 8.9474       | 8.1665      | 8.1647       | TRUE      |
| Alkaline phosphatase OS=Mus musculus GN=Alpl PE=2 SV=1                                        | B7XGA6 (+1)      | Alpl         | 57 kDa  | 0            | 6.3914      | 0            | 0           | 0            | TRUE      |
| Alpha glucosidase 2 alpha neutral subunit OS=Mus musculus GN=Ganab PE=2 SV=1                  | A1A4T2           | Ganab        | 109 kDa | 0            | 15.979      | 17.895       | 15.108      | 16.759       | TRUE      |
| Alpha v integrin OS=Mus musculus GN=Itgav PE=2 SV=1                                           | A0A0F7IQ06 (+1)  | Itgav        | 115 kDa | 51.563       | 57.523      | 42.947       | 7.3499      | 6.4458       | TRUE      |
| Alpha-1,3/1,6-mannosyltransferase ALG2 OS=Mus musculus GN=Alg2 PE=1 SV=2                      | Q9DBE8           | Alg2         | 47 kDa  | 0            | 0           | 3.5789       | 0           | 0            | TRUE      |
| Alpha-actinin-1 OS=Mus musculus GN=Actn1 PE=1 SV=1                                            | Q7TPR4           | Actn1        | 103 kDa | 0            | 17.576      | 0            | 17.15       | 13.321       | TRUE      |
| Alpha-actinin-4 OS=Mus musculus GN=Actn4 PE=1 SV=1                                            | P57780 (+1)      | Actn4        | 105 kDa | 0            | 15.979      | 5.3684       | 14.7        | 10.743       | TRUE      |
| Alpha-crystallin B chain OS=Mus musculus GN=Cryab PE=1 SV=2                                   | P23927 (+1)      | Cryab        | 20 kDa  | 3.6831       | 0           | 0            | 0           | 0            | TRUE      |
| Alpha-globin OS=Mus musculus GN=Hbat1 PE=3 SV=1                                               | A8DUV3 (+6)      | Hbat1        | 15 kDa  | 5.5246       | 0           | 5.3684       | 0           | 0            | TRUE      |
| Amine oxidase (Fragment) OS=Mus musculus GN=Maoa PE=2 SV=1                                    | Q3TPD9 (+3)      | Maoa         | 59 kDa  | 0            | 3.1957      | 5.3684       | 4.0833      | 6.8755       | TRUE      |
| Aminoacyl tRNA synthase complex-interacting multifunctional protein 1 OS=Mus musculus GN=A    | P31230 (+1)      | Aimp1        | 34 kDa  | 9.2077       | 4.7936      | 3.5789       | 5.7166      | 6.4458       | TRUE      |
| Aminoacyl tRNA synthase complex-interacting multifunctional protein 2 OS=Mus musculus GN=A    | Q8R010           | Aimp2        | 35 kDa  | 0            | 3.1957      | 0            | 1.225       | 1.2892       | TRUE      |
| Angiopoietin-related protein 2 OS=Mus musculus GN=Angptl2 PE=2 SV=2                           | Q9R045           | Angptl2      | 57 kDa  | 12.891       | 6.3914      | 8.9474       | 1.225       | 0            | TRUE      |
| Ankyrin repeat domain-containing protein 17 OS=Mus musculus GN=Ankrd17 PE=1 SV=1              | A0A0G2JDZ9 (+1)  | Ankrd17      | 264 kDa | 23.94        | 22.37       | 25.053       | 2.0416      | 2.1486       | TRUE      |
| Annexin A2 OS=Mus musculus GN=Anxa2 PE=1 SV=2                                                 | P07356 (+1)      | Anxa2        | 39 kDa  | 34.989       | 39.947      | 44.737       | 11.433      | 13.321       | TRUE      |
| Annexin A3 OS=Mus musculus GN=Anxa3 PE=1 SV=4                                                 | Q35639 (+2)      | Anxa3        | 36 kDa  | 0            | 0           | 8.9474       | 11.025      | 8.5944       | TRUE      |
| Annexin A5 OS=Mus musculus GN=Anxa5 PE=1 SV=1                                                 | P48036           | Anxa5        | 36 kDa  | 11.049       | 14.381      | 23.263       | 10.616      | 12.032       | TRUE      |
| Annexin OS=Mus musculus GN=Anxa1 PE=2 SV=1                                                    | B7STB7 (+2)      | Anxa1        | 39 kDa  | 14.732       | 15.979      | 25.053       | 14.7        | 12.032       | TRUE      |
| Anthrax toxin receptor 1 OS=Mus musculus GN=Antxr1 PE=1 SV=2                                  | Q9CZ52           | Antxr1       | 62 kDa  | 0            | 9.5872      | 0            | 0           | 0            | TRUE      |
| Antigen peptide transporter 2 OS=Mus musculus GN=Tap2 PE=1 SV=1                               | P36371 (+4)      | Tap2         | 77 kDa  | 0            | 3.1957      | 0            | 2.45        | 0            | TRUE      |
| Antigen-presenting glycoprotein CD1d1 OS=Mus musculus GN=Cd1d1 PE=1 SV=1                      | A0A0R4J090 (+2)  | Cd1d1        | 39 kDa  | 0            | 3.1957      | 3.5789       | 0           | 0            | TRUE      |
| Apoa1 protein OS=Mus musculus GN=Apoa1 PE=2 SV=1                                              | Q58EV2           | Apoa1        | 23 kDa  | 3.6831       | 0           | 0            | 0           | 0            | TRUE      |
| Apolipoprotein B-100 OS=Mus musculus GN=ApoB PE=1 SV=1                                        | E9Q414           | ApoB         | 509 kDa | 5.5246       | 0           | 0            | 0           | 0            | TRUE      |
| Arf-GAP domain and FG repeat-containing protein 1 OS=Mus musculus GN=Agfg1 PE=1 SV=1          | A0A087WNV1 (+3)  | Agfg1        | 54 kDa  | 3.6831       | 3.1957      | 3.5789       | 1.6333      | 2.1486       | TRUE      |
| Arginine-tRNA ligase, cytoplasmic OS=Mus musculus GN=Rars PE=1 SV=2                           | Q9D0I9           | Rars         | 76 kDa  | 16.574       | 11.185      | 7.1579       | 7.7582      | 9.8835       | TRUE      |
| Aspartate aminotransferase, mitochondrial OS=Mus musculus GN=Got2 PE=1 SV=1                   | P05202           | Got2         | 47 kDa  | 20.257       | 14.381      | 16.105       | 11.433      | 13.321       | TRUE      |
| Aspartyl aminopeptidase OS=Mus musculus GN=Dnpep PE=1 SV=1                                    | Q3TVK3 (+3)      | Dnpep        | 52 kDa  | 9.2077       | 12.783      | 10.737       | 4.8999      | 4.2972       | TRUE      |
| Ataxin-10 OS=Mus musculus GN=Atxn10 PE=1 SV=2                                                 | P28658 (+1)      | Atxn10       | 54 kDa  | 7.3662       | 4.7936      | 8.9474       | 5.3082      | 4.2972       | TRUE      |
| Ataxin-2-like protein OS=Mus musculus GN=Atxn2l PE=1 SV=1                                     | Q3TGG2           | Atxn2l       | 105 kDa | 3.6831       | 3.1957      | 3.5789       | 3.6749      | 1.7189       | TRUE      |
| ATP synthase subunit alpha, mitochondrial OS=Mus musculus GN=Atp5a1 PE=1 SV=1                 | Q03265           | Atp5a1       | 60 kDa  | 23.94        | 25.566      | 39.368       | 18.375      | 16.329       | TRUE      |
| ATP synthase subunit beta, mitochondrial OS=Mus musculus GN=Atp5b PE=1 SV=2                   | P56480           | Atp5b        | 56 kDa  | 22.099       | 35.153      | 35.789       | 15.925      | 17.618       | TRUE      |
| ATP synthase subunit d, mitochondrial (Fragment) OS=Mus musculus GN=Atp5h PE=1 SV=1           | B1ASE2 (+2)      | Atp5h        | 16 kDa  | 0            | 4.7936      | 0            | 0.81665     | 1.2892       | TRUE      |
| ATP synthase subunit epsilon, mitochondrial OS=Mus musculus GN=Atp5e PE=1 SV=2                | P56382 (+2)      | Atp5e        | 6 kDa   | 0            | 3.1957      | 3.5789       | 0           | 0            | TRUE      |
| ATP synthase subunit gamma OS=Mus musculus GN=Atp5c1 PE=1 SV=1                                | A2AKU9 (+3)      | Atp5c1       | 33 kDa  | 7.3662       | 7.9893      | 12.526       | 3.2666      | 3.8675       | TRUE      |
| ATP synthase, H+ transporting, mitochondrial F0 complex, subunit b, isoform 1 OS=Mus musculus | Q5I0W0 (+1)      | Atp5f1       | 29 kDa  | 0            | 3.1957      | 3.5789       | 0.81665     | 1.2892       | TRUE      |
| ATP synthase, H+ transporting, mitochondrial F1 complex, delta subunit, isoform CRA_c OS=Mus  | Q4FK74 (+2)      | Atp5d        | 18 kDa  | 3.6831       | 4.7936      | 5.3684       | 1.6333      | 2.1486       | TRUE      |

| Identified Proteins (2666)                                                                   | Accession Number | Alternate ID | MW      | VPSko-biotin | ctrl-biotin | VPSoe-biotin | ctrl lysate | VPSoe lysate | enriched? |
|----------------------------------------------------------------------------------------------|------------------|--------------|---------|--------------|-------------|--------------|-------------|--------------|-----------|
| ATP-binding cassette sub-family F member 2 OS=Mus musculus GN=Abcf2 PE=1 SV=1                | Q99LE6           | Abcf2        | 72 kDa  | 5.5246       | 0           | 0            | 4.4916      | 5.5863       | TRUE      |
| ATP-binding cassette, sub-family C (CFTR/MRP), member 1 OS=Mus musculus GN=Abcc1 PE=1 SV=1   | A5D6P3 (+1)      | Abcc1        | 171 kDa | 7.3662       | 12.783      | 19.684       | 2.45        | 4.2972       | TRUE      |
| ATP-dependent RNA helicase DDX1 OS=Mus musculus GN=Ddx1 PE=1 SV=1                            | Q91VR5           | Ddx1         | 83 kDa  | 5.5246       | 12.783      | 14.316       | 6.9416      | 5.5863       | TRUE      |
| ATPase family AAA domain-containing protein 3 OS=Mus musculus GN=Atad3 PE=1 SV=1             | Q925I1           | Atad3        | 67 kDa  | 0            | 0           | 3.5789       | 0.81665     | 1.2892       | TRUE      |
| B-cell CLL/lymphoma 9-like protein OS=Mus musculus GN=Bcl9l PE=1 SV=1                        | Q67FY2           | Bcl9l        | 157 kDa | 0            | 0           | 3.5789       | 0           | 0            | TRUE      |
| Basic leucine zipper and W2 domain-containing protein 2 OS=Mus musculus molossinus GN=Bzw2   | Q2L4X1 (+1)      | Bzw2         | 48 kDa  | 0            | 0           | 3.5789       | 2.45        | 2.5783       | TRUE      |
| Basigin (Fragment) OS=Mus musculus GN=Bsg PE=2 SV=1                                          | O55107           | Bsg          | 30 kDa  | 14.732       | 14.381      | 16.105       | 2.8583      | 3.8675       | TRUE      |
| BCL2-associated athanogene 3 OS=Mus musculus GN=Bag3 PE=2 SV=1                               | A6H663 (+2)      | Bag3         | 62 kDa  | 9.2077       | 0           | 12.526       | 1.6333      | 1.2892       | TRUE      |
| BCL2/adenovirus E1B 19 kDa protein-interacting protein 3 OS=Mus musculus GN=Bnip3 PE=1 SV=1  | A0A1B0GT26 (+1)  | Bnip3        | 19 kDa  | 3.6831       | 0           | 3.5789       | 0           | 0            | TRUE      |
| Beta-2-microglobulin OS=Mus musculus GN=B2m PE=2 SV=1                                        | Q9D239           | B2m          | 14 kDa  | 7.3662       | 7.9893      | 5.3684       | 0.81665     | 0            | TRUE      |
| Beta-globin OS=Mus musculus GN=Hbbt1 PE=3 SV=1                                               | A8DUN2           | Hbbt1        | 16 kDa  | 3.6831       | 3.1957      | 3.5789       | 0           | 0            | TRUE      |
| Bifunctional glutamate/proline-tRNA ligase OS=Mus musculus GN=Eprs PE=1 SV=4                 | Q8CGC7           | Eprs         | 170 kDa | 20.257       | 15.979      | 19.684       | 22.458      | 18.478       | TRUE      |
| Biglycan OS=Mus musculus GN=Bgn PE=1 SV=1                                                    | P28653 (+1)      | Bgn          | 42 kDa  | 0            | 3.1957      | 0            | 2.45        | 2.1486       | TRUE      |
| Bone marrow stromal antigen 2 OS=Mus musculus GN=Bst2 PE=1 SV=1                              | Q8R2Q8           | Bst2         | 19 kDa  | 3.6831       | 6.3914      | 0            | 1.225       | 0            | TRUE      |
| Bone morphogenetic protein receptor type-2 OS=Mus musculus GN=Bmpr2 PE=1 SV=1                | O35607           | Bmpr2        | 115 kDa | 0            | 0           | 3.5789       | 0           | 0            | TRUE      |
| Brain acid soluble protein 1 OS=Mus musculus GN=Basp1 PE=1 SV=3                              | Q91XV3           | Basp1        | 22 kDa  | 3.6831       | 0           | 3.5789       | 3.2666      | 2.5783       | TRUE      |
| Branched-chain-amino-acid aminotransferase, cytosolic OS=Mus musculus GN=Bcat1 PE=1 SV=2     | P24288 (+2)      | Bcat1        | 43 kDa  | 3.6831       | 0           | 0            | 3.2666      | 3.008        | TRUE      |
| CAD protein OS=Mus musculus GN=Cad PE=1 SV=1                                                 | B2RQC6 (+1)      | Cad          | 243 kDa | 16.574       | 6.3914      | 7.1579       | 13.475      | 16.329       | TRUE      |
| Cadherin-11 OS=Mus musculus GN=Cdh11 PE=1 SV=1                                               | P55288 (+1)      | Cdh11        | 88 kDa  | 3.6831       | 25.566      | 8.9474       | 1.225       | 0            | TRUE      |
| Cadherin-2 OS=Mus musculus GN=Cdh2 PE=1 SV=1                                                 | D3YYT0 (+3)      | Cdh2         | 94 kDa  | 0            | 7.9893      | 0            | 0.81665     | 0            | TRUE      |
| Calcium homeostasis modulator protein 2 OS=Mus musculus GN=Calhm2 PE=1 SV=1                  | D3Z2E8 (+2)      | Calhm2       | 36 kDa  | 0            | 3.1957      | 0            | 0           | 0            | TRUE      |
| Calcium-binding mitochondrial carrier protein Aralar1 OS=Mus musculus GN=Slc25a12 PE=1 SV=1  | Q8BH59           | Slc25a12     | 75 kDa  | 14.732       | 12.783      | 16.105       | 4.8999      | 6.0161       | TRUE      |
| Calcium-binding mitochondrial carrier protein ScaMC-1 OS=Mus musculus GN=Slc25a24 PE=1 SV=1  | Q8BMD8           | Slc25a24     | 53 kDa  | 12.891       | 7.9893      | 10.737       | 2.0416      | 3.4377       | TRUE      |
| Caldesmon 1 OS=Mus musculus GN=Cald1 PE=1 SV=1                                               | Q8VCO8           | Cald1        | 60 kDa  | 0            | 14.381      | 10.737       | 17.15       | 13.321       | TRUE      |
| Calmodulin-1 OS=Mus musculus GN=Calm1 PE=1 SV=1                                              | Q3UKW2           | Calm1        | 22 kDa  | 3.6831       | 3.1957      | 3.5789       | 2.45        | 2.1486       | TRUE      |
| Calnexin OS=Mus musculus GN=Canx PE=1 SV=1                                                   | P35564 (+1)      | Canx         | 67 kDa  | 5.5246       | 11.185      | 12.526       | 12.25       | 13.751       | TRUE      |
| cAMP-dependent protein kinase catalytic subunit alpha OS=Mus musculus GN=Prkaca PE=1 SV=1    | P05132           | Prkaca       | 41 kDa  | 3.6831       | 0           | 7.1579       | 2.0416      | 3.4377       | TRUE      |
| Cancer-related nucleoside-triphosphatase homolog OS=Mus musculus GN=Ntpcr PE=1 SV=1          | D3Z2W9           | Ntpcr        | 17 kDa  | 3.6831       | 0           | 0            | 0           | 0            | TRUE      |
| Capping protein (Actin filament) muscle Z-line, beta, isoform CRA_a OS=Mus musculus GN=Capzb | A2AMW0 (+1)      | Capzb        | 29 kDa  | 5.5246       | 9.5872      | 16.105       | 8.9832      | 10.743       | TRUE      |
| Caprin-1 OS=Mus musculus GN=Caprin1 PE=1 SV=2                                                | Q60865           | Caprin1      | 78 kDa  | 7.3662       | 4.7936      | 5.3684       | 2.0416      | 2.1486       | TRUE      |
| Carboxylic ester hydrolase OS=Mus musculus GN=Ces1g PE=1 SV=1                                | Q3UW56 (+1)      | Ces1g        | 63 kDa  | 0            | 7.9893      | 3.5789       | 4.0833      | 2.1486       | TRUE      |
| Carnitine O-palmitoyltransferase 1, liver isoform OS=Mus musculus GN=Cpt1a PE=1 SV=4         | P97742 (+2)      | Cpt1a        | 88 kDa  | 0            | 0           | 3.5789       | 0           | 2.1486       | TRUE      |
| Casein kinase II subunit alpha OS=Mus musculus GN=Csnk2a1 PE=1 SV=2                          | Q60737 (+1)      | Csnk2a1      | 45 kDa  | 3.6831       | 3.1957      | 3.5789       | 3.2666      | 2.1486       | TRUE      |
| Catenin alpha-1 OS=Mus musculus GN=Ctnna1 PE=1 SV=1                                          | P26231 (+1)      | Ctnna1       | 100 kDa | 23.94        | 46.338      | 28.632       | 4.4916      | 3.008        | TRUE      |
| Catenin beta-1 OS=Mus musculus GN=Ctnnb1 PE=1 SV=1                                           | Q02248 (+1)      | Ctnnb1       | 85 kDa  | 23.94        | 31.957      | 17.895       | 4.4916      | 2.1486       | TRUE      |
| Catenin delta-1 OS=Mus musculus GN=Ctnnd1 PE=1 SV=2                                          | P30999           | Ctnnd1       | 105 kDa | 29.465       | 43.142      | 39.368       | 9.7998      | 5.5863       | TRUE      |
| Caveolae-associated protein 1 OS=Mus musculus GN=Cavin1 PE=1 SV=1                            | O54724           | Cavin1       | 44 kDa  | 0            | 7.9893      | 0            | 5.7166      | 5.1566       | TRUE      |
| Caveolin-1 OS=Mus musculus GN=Cav1 PE=1 SV=1                                                 | P49817           | Cav1         | 21 kDa  | 0            | 3.1957      | 0            | 0.81665     | 1.2892       | TRUE      |
| CCR4-NOT transcription complex subunit 4 OS=Mus musculus GN=Cnot4 PE=1 SV=1                  | E9QA19 (+1)      | Cnot4        | 71 kDa  | 7.3662       | 7.9893      | 3.5789       | 0           | 0            | TRUE      |
| CD109 antigen OS=Mus musculus GN=Cd109 PE=1 SV=1                                             | A6MDD3 (+1)      | Cd109        | 162 kDa | 18.415       | 11.185      | 17.895       | 0           | 2.1486       | TRUE      |
| CD166 antigen OS=Mus musculus GN=Alcam PE=1 SV=1                                             | E9Q3Q6 (+3)      | Alcam        | 64 kDa  | 20.257       | 0           | 10.737       | 0           | 0            | TRUE      |
| CD34 antigen, isoform CRA_b OS=Mus musculus GN=Cd34 PE=2 SV=1                                | Q543B6 (+1)      | Cd34         | 41 kDa  | 5.5246       | 4.7936      | 3.5789       | 1.225       | 0.85944      | TRUE      |
| CD44 antigen OS=Mus musculus GN=Cd44 PE=1 SV=1                                               | A2APM1 (+3)      | Cd44         | 72 kDa  | 12.891       | 15.979      | 7.1579       | 3.2666      | 3.008        | TRUE      |
| CD63 antigen OS=Mus musculus GN=Cd63 PE=1 SV=2                                               | P41731 (+3)      | Cd63         | 26 kDa  | 0            | 4.7936      | 0            | 1.6333      | 1.7189       | TRUE      |
| CD97 antigen OS=Mus musculus GN=Cd97 PE=1 SV=2                                               | Q9Z0M6           | Cd97         | 90 kDa  | 0            | 7.9893      | 3.5789       | 1.225       | 0.85944      | TRUE      |
| Cdc42 effector protein 1 OS=Mus musculus GN=Cdc42ep1 PE=1 SV=1                               | Q91W92           | Cdc42ep1     | 43 kDa  | 5.5246       | 7.9893      | 8.9474       | 1.6333      | 1.7189       | TRUE      |
| Cell surface glycoprotein MUC18 OS=Mus musculus GN=Mcam PE=1 SV=1                            | Q8R2Y2           | Mcam         | 72 kDa  | 3.6831       | 0           | 0            | 0           | 0            | TRUE      |
| Cell surface hyaluronidase OS=Mus musculus GN=Tmem2 PE=1 SV=1                                | Q5FWI3           | Tmem2        | 154 kDa | 7.3662       | 14.381      | 3.5789       | 0           | 0            | TRUE      |
| Charged multivesicular body protein 1a OS=Mus musculus GN=Chmp1a PE=1 SV=1                   | Q921W0           | Chmp1a       | 22 kDa  | 3.6831       | 0           | 3.5789       | 0           | 0            | TRUE      |
| Choline transporter-like protein 2 OS=Mus musculus GN=Slc44a2 PE=1 SV=2                      | Q8BY89           | Slc44a2      | 80 kDa  | 0            | 6.3914      | 3.5789       | 1.6333      | 1.2892       | TRUE      |
| Chondroitin sulfate proteoglycan 4 OS=Mus musculus GN=Cspg4 PE=1 SV=3                        | Q8VHY0           | Cspg4        | 252 kDa | 51.563       | 60.719      | 17.895       | 1.225       | 0            | TRUE      |

| Identified Proteins (2666)                                                                                                                          | Accession Number | Alternate ID | MW      | VPSko-biotin | ctrl-biotin | VPSoe-biotin | ctrl lysate | VPSoe lysate | enriched? |
|-----------------------------------------------------------------------------------------------------------------------------------------------------|------------------|--------------|---------|--------------|-------------|--------------|-------------|--------------|-----------|
| Citrate synthase, mitochondrial OS=Mus musculus GN=Cs PE=1 SV=1                                                                                     | Q9CZU6           | Cs           | 52 kDa  | 9.2077       | 12.783      | 16.105       | 2.8583      | 3.008        | TRUE      |
| Clathrin interactor 1 OS=Mus musculus GN=Clint1 PE=1 SV=1                                                                                           | Q5SUH6 (+1)      | Clint1       | 70 kDa  | 11.049       | 11.185      | 12.526       | 3.6749      | 3.8675       | TRUE      |
| Collagen alpha-1(I) chain OS=Mus musculus GN=Col1a1 PE=1 SV=4                                                                                       | P11087           | Col1a1       | 138 kDa | 0            | 7.9893      | 3.5789       | 10.616      | 3.8675       | TRUE      |
| Collagen alpha-1(VI) chain OS=Mus musculus GN=Col6a1 PE=1 SV=1                                                                                      | Q04857           | Col6a1       | 108 kDa | 3.6831       | 4.7936      | 3.5789       | 4.4916      | 3.4377       | TRUE      |
| Collagen alpha-2(V) chain OS=Mus musculus GN=Col5a2 PE=1 SV=1                                                                                       | Q3U962           | Col5a2       | 145 kDa | 0            | 0           | 3.5789       | 2.0416      | 1.2892       | TRUE      |
| Collagen, type V, alpha 1 OS=Mus musculus GN=Col5a1 PE=1 SV=1                                                                                       | B1AWB9 (+1)      | Col5a1       | 184 kDa | 0            | 4.7936      | 0            | 4.0833      | 0            | TRUE      |
| Collagen, type VI, alpha 3 OS=Mus musculus GN=Col6a3 PE=1 SV=2                                                                                      | E9PWQ3           | Col6a3       | 354 kDa | 5.5246       | 19.174      | 16.105       | 11.841      | 12.032       | TRUE      |
| Complement C3 OS=Mus musculus GN=C3 PE=1 SV=3                                                                                                       | P01027           | C3           | 186 kDa | 7.3662       | 6.3914      | 7.1579       | 1.6333      | 3.4377       | TRUE      |
| Complement component 1 Q subcomponent-binding protein, mitochondrial OS=Mus musculus GN=Q8R5L1                                                      | Q8R5L1           | C1qbp        | 31 kDa  | 3.6831       | 0           | 0            | 1.6333      | 2.1486       | TRUE      |
| Complement component 4B (Chido blood group) OS=Mus musculus GN=C4b PE=2 SV=1                                                                        | B2RWX2 (+2)      | C4b          | 193 kDa | 3.6831       | 0           | 0            | 0           | 0            | TRUE      |
| Constitutive coactivator of PPAR-gamma-like protein 1 OS=Mus musculus GN=FAM120A PE=1 SV=1                                                          | Q6A0A9           | FAM120A      | 122 kDa | 7.3662       | 7.9893      | 8.9474       | 5.7166      | 6.4458       | TRUE      |
| COP9 signalosome complex subunit 5 OS=Mus musculus GN=Cops5 PE=1 SV=3                                                                               | Q35864           | Cops5        | 38 kDa  | 3.6831       | 3.1957      | 3.5789       | 2.0416      | 1.7189       | TRUE      |
| CTP synthase 1 OS=Mus musculus GN=Ctps1 PE=1 SV=2                                                                                                   | P70698           | Ctps1        | 67 kDa  | 14.732       | 14.381      | 10.737       | 6.9416      | 7.3052       | TRUE      |
| CUB and Sushi multiple domains 2 OS=Mus musculus GN=Csmd2 PE=1 SV=2                                                                                 | V9GX34           | Csmd2        | 392 kDa | 3.6831       | 0           | 0            | 0           | 0            | TRUE      |
| Cullin-associated NEDD8-dissociated protein 1 OS=Mus musculus GN=Cand1 PE=1 SV=2                                                                    | Q6ZQ38           | Cand1        | 136 kDa | 11.049       | 22.37       | 21.474       | 15.108      | 12.892       | TRUE      |
| Cyclin-dependent kinase 1 OS=Mus musculus GN=Cdk1 PE=1 SV=3                                                                                         | P11440 (+1)      | Cdk1         | 34 kDa  | 9.2077       | 19.174      | 17.895       | 9.3915      | 8.5944       | TRUE      |
| Cystatin-B OS=Mus musculus GN=Cstb PE=1 SV=1                                                                                                        | Q62426           | Cstb         | 11 kDa  | 5.5246       | 0           | 7.1579       | 1.225       | 1.2892       | TRUE      |
| Cytochrome b-c1 complex subunit 2, mitochondrial OS=Mus musculus GN=Uqcr2 PE=1 SV=1                                                                 | Q9DB77           | Uqcr2        | 48 kDa  | 11.049       | 12.783      | 14.316       | 5.3082      | 7.3052       | TRUE      |
| Cytochrome c oxidase subunit 5A, mitochondrial OS=Mus musculus GN=Cox5a PE=1 SV=2                                                                   | P12787           | Cox5a        | 16 kDa  | 0            | 4.7936      | 3.5789       | 2.0416      | 0.85944      | TRUE      |
| Cytochrome c oxidase subunit IV isoform 1 OS=Mus musculus GN=Cox4i1 PE=1 SV=1                                                                       | A2RSV8 (+1)      | Cox4i1       | 20 kDa  | 0            | 3.1957      | 3.5789       | 2.8583      | 2.1486       | TRUE      |
| Cytochrome c, somatic OS=Mus musculus GN=Cycs PE=1 SV=2                                                                                             | P62897 (+1)      | Cycs         | 12 kDa  | 3.6831       | 6.3914      | 3.5789       | 4.8999      | 1.7189       | TRUE      |
| Cytochrome c1, heme protein, mitochondrial OS=Mus musculus GN=Cyc1 PE=1 SV=1                                                                        | Q9D0M3           | Cyc1         | 35 kDa  | 3.6831       | 6.3914      | 8.9474       | 1.225       | 3.008        | TRUE      |
| Cytokine receptor-like factor 1 OS=Mus musculus GN=Crlf1 PE=1 SV=1                                                                                  | Q9JM58           | Crlf1        | 47 kDa  | 0            | 3.1957      | 0            | 0           | 0            | TRUE      |
| Cytoplasmic FMR1-interacting protein 1 OS=Mus musculus GN=Cyfp1 PE=1 SV=1                                                                           | Q7TMB8           | Cyfp1        | 145 kDa | 3.6831       | 4.7936      | 3.5789       | 4.4916      | 3.4377       | TRUE      |
| Cytoskeleton-associated protein 4 OS=Mus musculus GN=Ckap4 PE=1 SV=2                                                                                | Q8BMK4           | Ckap4        | 64 kDa  | 22.099       | 27.164      | 28.632       | 8.9832      | 6.4458       | TRUE      |
| Cytoskeleton-associated protein 5 OS=Mus musculus GN=Ckap5 PE=1 SV=1                                                                                | Z4YL78           | Ckap5        | 219 kDa | 0            | 0           | 3.5789       | 5.3082      | 3.4377       | TRUE      |
| Cytosolic phospholipase A2 OS=Mus musculus GN=Pla2g4a PE=1 SV=1                                                                                     | P47713 (+2)      | Pla2g4a      | 85 kDa  | 0            | 4.7936      | 0            | 8.1665      | 3.8675       | TRUE      |
| D-3-phosphoglycerate dehydrogenase OS=Mus musculus GN=Phgdh PE=1 SV=3                                                                               | Q61753           | Phgdh        | 57 kDa  | 16.574       | 11.185      | 10.737       | 10.208      | 10.743       | TRUE      |
| Ddx3x protein OS=Mus musculus GN=Ddx3x PE=2 SV=1                                                                                                    | B7ZWF1 (+3)      | Ddx3x        | 73 kDa  | 14.732       | 12.783      | 12.526       | 9.3915      | 9.4538       | TRUE      |
| DEAD (Asp-Glu-Ala-Asp) box polypeptide 17, isoform CRA_a OS=Mus musculus GN=Ddx17 PE=1 SV=1                                                         | Q3U741 (+1)      | Ddx17        | 73 kDa  | 9.2077       | 6.3914      | 0            | 6.1249      | 6.4458       | TRUE      |
| DEAD (Asp-Glu-Ala-Asp) box polypeptide 5 OS=Mus musculus GN=Ddx5 PE=2 SV=1                                                                          | A1L333 (+4)      | Ddx5         | 69 kDa  | 12.891       | 9.5872      | 10.737       | 7.7582      | 7.3052       | TRUE      |
| Death domain-containing membrane protein NRADD OS=Mus musculus GN=Nradd PE=1 SV=1                                                                   | Q8CJ26           | Nradd        | 25 kDa  | 7.3662       | 4.7936      | 3.5789       | 0           | 0            | TRUE      |
| Desmoglein 1 beta OS=Mus musculus GN=Dsg1b PE=2 SV=1                                                                                                | B2RQH0 (+1)      | Dsg1b        | 114 kDa | 9.2077       | 7.9893      | 0            | 0           | 0            | TRUE      |
| Desmoplakin OS=Mus musculus GN=Dsp PE=1 SV=1                                                                                                        | E9Q557           | Dsp          | 333 kDa | 49.722       | 36.751      | 19.684       | 0           | 0            | TRUE      |
| Destrin OS=Mus musculus GN=Dstn PE=1 SV=1                                                                                                           | Q4FK36 (+1)      | Dstn         | 19 kDa  | 5.5246       | 9.5872      | 7.1579       | 6.5332      | 5.5863       | TRUE      |
| Dihydropyridyl dehydrogenase, mitochondrial OS=Mus musculus GN=Did PE=1 SV=2                                                                        | Q08749           | Did          | 54 kDa  | 3.6831       | 3.1957      | 7.1579       | 4.4916      | 5.5863       | TRUE      |
| Dihydropyridyllysine-residue acetyltransferase component of pyruvate dehydrogenase complex, mitochondrial OS=Mus musculus GN=Dlat PE=1 SV=1         | Q8BMF4           | Dlat         | 68 kDa  | 0            | 7.9893      | 5.3684       | 3.6749      | 3.8675       | TRUE      |
| Dihydropyridyllysine-residue succinyltransferase component of 2-oxoglutarate dehydrogenase complex, mitochondrial OS=Mus musculus GN=Dlst PE=1 SV=1 | Q9D2G2           | Dlst         | 49 kDa  | 0            | 4.7936      | 7.1579       | 2.0416      | 2.5783       | TRUE      |
| Disabled homolog 2 OS=Mus musculus GN=Dab2 PE=1 SV=1                                                                                                | A0A0R4J104 (+2)  | Dab2         | 82 kDa  | 0            | 0           | 3.5789       | 3.2666      | 5.1566       | TRUE      |
| Discoidin domain-containing receptor 2 OS=Mus musculus GN=Ddr2 PE=1 SV=2                                                                            | Q62371           | Ddr2         | 96 kDa  | 0            | 3.1957      | 0            | 1.225       | 0            | TRUE      |
| Discoidin, CUB and LCCL domain-containing protein 2 OS=Mus musculus GN=Dcbld2 PE=1 SV=1                                                             | Q91ZV3           | Dcbld2       | 84 kDa  | 3.6831       | 6.3914      | 10.737       | 0           | 0            | TRUE      |
| Disintegrin and metalloproteinase domain-containing protein 10 OS=Mus musculus GN=Adam10 PE=1 SV=1                                                  | O35598           | Adam10       | 84 kDa  | 0            | 0           | 3.5789       | 0           | 2.1486       | TRUE      |
| Disintegrin and metalloproteinase domain-containing protein 9 OS=Mus musculus GN=Adam9 PE=1 SV=1                                                    | A0A140LHU0 (+2)  | Adam9        | 94 kDa  | 0            | 3.1957      | 0            | 2.0416      | 1.7189       | TRUE      |
| DNA helicase OS=Mus musculus GN=Mcm3 PE=2 SV=1                                                                                                      | Q3ULD6           | Mcm3         | 92 kDa  | 12.891       | 6.3914      | 5.3684       | 6.1249      | 7.7349       | TRUE      |
| DnaJ homolog subfamily A member 1 OS=Mus musculus GN=Dnaja1 PE=1 SV=1                                                                               | P63037 (+1)      | Dnaja1       | 45 kDa  | 11.049       | 4.7936      | 10.737       | 7.3499      | 3.4377       | TRUE      |
| DnaJ homolog subfamily A member 3, mitochondrial OS=Mus musculus GN=Dnaja3 PE=1 SV=1                                                                | Q99M87           | Dnaja3       | 52 kDa  | 0            | 4.7936      | 0            | 0           | 0            | TRUE      |
| DnaJ homolog subfamily B member 11 OS=Mus musculus GN=Dnajb11 PE=1 SV=1                                                                             | Q99KV1           | Dnajb11      | 41 kDa  | 5.5246       | 7.9893      | 8.9474       | 1.225       | 1.2892       | TRUE      |
| DnaJ homolog subfamily B member 2 OS=Mus musculus GN=Dnajb2 PE=1 SV=3                                                                               | Q9QYI5           | Dnajb2       | 36 kDa  | 5.5246       | 0           | 0            | 0           | 0            | TRUE      |
| DnaJ homolog subfamily B member 6 OS=Mus musculus GN=Dnajb6 PE=1 SV=4                                                                               | O54946           | Dnajb6       | 40 kDa  | 12.891       | 9.5872      | 16.105       | 0           | 1.2892       | TRUE      |
| DnaJ homolog subfamily C member 7 OS=Mus musculus GN=Dnajc7 PE=1 SV=2                                                                               | Q9QYI3           | Dnajc7       | 56 kDa  | 0            | 0           | 3.5789       | 2.0416      | 2.5783       | TRUE      |
| Dolichol-phosphate mannosyltransferase subunit 1 OS=Mus musculus GN=Dpm1 PE=1 SV=1                                                                  | O70152           | Dpm1         | 29 kDa  | 7.3662       | 4.7936      | 8.9474       | 1.225       | 0.85944      | TRUE      |

| Identified Proteins (2666)                                                                      | Accession Number | Alternate ID | MW      | VPSko-biotin | ctrl-biotin | VPSoe-biotin | ctrl lysate | VPSoe lysate | enriched? |
|-------------------------------------------------------------------------------------------------|------------------|--------------|---------|--------------|-------------|--------------|-------------|--------------|-----------|
| Dolichyl-diphosphooligosaccharide-protein glycosyltransferase 48 kDa subunit OS=Mus musculus    | O54734 (+2)      | Ddost        | 49 kDa  | 0            | 3.1957      | 0            | 2.45        | 2.1486       | TRUE      |
| Dolichyl-diphosphooligosaccharide-protein glycosyltransferase subunit 1 OS=Mus musculus GN=     | Q3U900 (+3)      | Rpn1         | 69 kDa  | 5.5246       | 15.979      | 10.737       | 13.066      | 11.602       | TRUE      |
| Dolichyl-diphosphooligosaccharide-protein glycosyltransferase subunit STT3A OS=Mus musculus     | P46978 (+5)      | Stt3a        | 81 kDa  | 0            | 4.7936      | 3.5789       | 3.2666      | 2.1486       | TRUE      |
| Dynamin-2 OS=Mus musculus GN=Dnm2 PE=1 SV=2                                                     | F8WIV5 (+4)      | Dnm2         | 98 kDa  | 0            | 4.7936      | 0            | 2.8583      | 3.008        | TRUE      |
| Dystroglycan 1 OS=Mus musculus GN=Dag1 PE=1 SV=1                                                | Q54465 (+2)      | Dag1         | 97 kDa  | 9.2077       | 6.3914      | 5.3684       | 0           | 0            | TRUE      |
| E3 SUMO-protein ligase RanBP2 OS=Mus musculus GN=Ranbp2 PE=1 SV=2                               | Q9ERU9           | Ranbp2       | 341 kDa | 5.5246       | 0           | 0            | 1.6333      | 0            | TRUE      |
| E3 ubiquitin-protein ligase DTX3L OS=Mus musculus GN=Dtx3l PE=1 SV=1                            | Q3UIR3           | Dtx3l        | 83 kDa  | 0            | 3.1957      | 0            | 2.8583      | 0            | TRUE      |
| E3 ubiquitin-protein ligase RNF213 OS=Mus musculus GN=Rnf213 PE=1 SV=1                          | AOA171EBL2 (+1)  | Rnf213       | 585 kDa | 0            | 22.37       | 0            | 31.441      | 1.2892       | TRUE      |
| E3 ubiquitin-protein ligase XIAP OS=Mus musculus GN=Xiap PE=1 SV=2                              | Q60989           | Xiap         | 56 kDa  | 0            | 4.7936      | 3.5789       | 0           | 0            | TRUE      |
| Ectonucleotide pyrophosphatase/phosphodiesterase 1, isoform CRA_a OS=Mus musculus GN=Enp        | AOA0R4J1Q7 (+2)  | Enpp1        | 103 kDa | 5.5246       | 4.7936      | 7.1579       | 0           | 0            | TRUE      |
| eIF-2-alpha kinase activator GCN1 OS=Mus musculus GN=Gcn1 PE=1 SV=1                             | E9PVA8           | Gcn1         | 293 kDa | 14.732       | 7.9893      | 16.105       | 7.7582      | 6.4458       | TRUE      |
| ELAV-like protein 1 OS=Mus musculus GN=Elavl1 PE=1 SV=2                                         | P70372 (+2)      | Elavl1       | 36 kDa  | 3.6831       | 4.7936      | 3.5789       | 1.6333      | 2.1486       | TRUE      |
| Elongation factor 1-alpha 1 OS=Mus musculus GN=Eef1a1 PE=1 SV=3                                 | P10126 (+2)      | Eef1a1       | 50 kDa  | 75.503       | 51.132      | 84.105       | 50.224      | 65.317       | TRUE      |
| Elongation factor 1-delta OS=Mus musculus GN=Eef1d PE=1 SV=1                                    | AOA0R4J1E2       | Eef1d        | 73 kDa  | 12.891       | 11.185      | 19.684       | 5.3082      | 4.7269       | TRUE      |
| Elongation factor Tu, mitochondrial OS=Mus musculus GN=Tufm PE=1 SV=1                           | Q8BFR5           | Tufm         | 50 kDa  | 0            | 3.1957      | 7.1579       | 5.7166      | 8.1647       | TRUE      |
| Elongin-B OS=Mus musculus GN=Elob PE=1 SV=1                                                     | P62869           | Elob         | 13 kDa  | 12.891       | 9.5872      | 8.9474       | 3.2666      | 2.1486       | TRUE      |
| Embigin OS=Mus musculus GN=Emb PE=1 SV=2                                                        | P21995 (+3)      | Emb          | 37 kDa  | 5.5246       | 3.1957      | 5.3684       | 0           | 0            | TRUE      |
| Emerin OS=Mus musculus GN=Emd PE=4 SV=1                                                         | A2AM95 (+1)      | Emd          | 29 kDa  | 7.3662       | 4.7936      | 12.526       | 3.6749      | 3.4377       | TRUE      |
| Endoglin OS=Mus musculus GN=Eng PE=1 SV=1                                                       | Q3UAM9 (+1)      | Eng          | 70 kDa  | 0            | 6.3914      | 0            | 0           | 0            | TRUE      |
| Endoplasmic reticulum protein OS=Mus musculus GN=Hsp90b1 PE=1 SV=2                              | P08113 (+3)      | Hsp90b1      | 92 kDa  | 18.415       | 33.555      | 39.368       | 28.175      | 28.361       | TRUE      |
| Endosialin (Fragment) OS=Mus musculus GN=Cd248 PE=2 SV=1                                        | AOA172Q386 (+1)  | Cd248        | 72 kDa  | 3.6831       | 3.1957      | 3.5789       | 0           | 0            | TRUE      |
| Enoyl-CoA delta isomerase 1, mitochondrial OS=Mus musculus GN=Eci1 PE=1 SV=2                    | P42125 (+1)      | Eci1         | 32 kDa  | 0            | 0           | 3.5789       | 0.81665     | 2.5783       | TRUE      |
| Envelope protein OS=Mus musculus PE=4 SV=1                                                      | AOA0A0U6W1       |              | 70 kDa  | 34.989       | 30.359      | 0            | 0           | 0            | TRUE      |
| Ephrin type-A receptor 2 OS=Mus musculus GN=Epha2 PE=1 SV=3                                     | Q03145           | Epha2        | 109 kDa | 12.891       | 11.185      | 17.895       | 2.0416      | 2.1486       | TRUE      |
| Ephrin type-B receptor 4 OS=Mus musculus GN=Ephb4 PE=1 SV=2                                     | P54761 (+2)      | Ephb4        | 109 kDa | 9.2077       | 9.5872      | 7.1579       | 0           | 0            | TRUE      |
| Ephrin-B1 OS=Mus musculus GN=Efnb1 PE=1 SV=1                                                    | P52795 (+1)      | Efnb1        | 38 kDa  | 7.3662       | 3.1957      | 7.1579       | 0           | 0            | TRUE      |
| Epidermal growth factor receptor OS=Mus musculus GN=Egfr PE=1 SV=1                              | Q01279 (+1)      | Egfr         | 135 kDa | 0            | 17.576      | 7.1579       | 0           | 0            | TRUE      |
| Equilibrative nucleoside transporter 1 OS=Mus musculus GN=Slc29a1 PE=1 SV=3                     | Q9JIM1           | Slc29a1      | 50 kDa  | 3.6831       | 0           | 0            | 0           | 0            | TRUE      |
| Erythrocyte band 7 integral membrane protein OS=Mus musculus GN=Stom PE=1 SV=3                  | P54116           | Stom         | 31 kDa  | 0            | 0           | 3.5789       | 2.0416      | 2.1486       | TRUE      |
| Eukaryotic translation elongation factor 1 gamma OS=Mus musculus GN=Eef1g PE=1 SV=1             | Q4FZK2 (+1)      | Eef1g        | 50 kDa  | 12.891       | 14.381      | 17.895       | 11.841      | 14.61        | TRUE      |
| Eukaryotic translation initiation factor 2, subunit 3, structural gene X-linked OS=Mus musculus | Q3TML6 (+2)      | Eif2s3x      | 51 kDa  | 7.3662       | 4.7936      | 5.3684       | 7.3499      | 6.8755       | TRUE      |
| Eukaryotic translation initiation factor 3 subunit A OS=Mus musculus GN=Eif3a PE=1 SV=5         | P23116           | Eif3a        | 162 kDa | 5.5246       | 6.3914      | 8.9474       | 8.9832      | 7.7349       | TRUE      |
| Eukaryotic translation initiation factor 3 subunit E OS=Mus musculus GN=Eif3e PE=1 SV=1         | P60229 (+1)      | Eif3e        | 52 kDa  | 3.6831       | 6.3914      | 5.3684       | 4.4916      | 3.8675       | TRUE      |
| Eukaryotic translation initiation factor 3 subunit L OS=Mus musculus GN=Eif3l PE=1 SV=1         | Q8QZY1           | Eif3l        | 67 kDa  | 0            | 4.7936      | 7.1579       | 4.4916      | 4.7269       | TRUE      |
| Eukaryotic translation initiation factor 4, gamma 2 OS=Mus musculus GN=Eif4g2 PE=2 SV=1         | AOJNY7 (+2)      | Eif4g2       | 102 kDa | 11.049       | 7.9893      | 12.526       | 2.45        | 2.5783       | TRUE      |
| Eukaryotic translation initiation factor 4E member 2 OS=Mus musculus GN=Eif4e2 PE=1 SV=1        | Q0P688 (+1)      | Eif4e2       | 28 kDa  | 7.3662       | 4.7936      | 10.737       | 0.81665     | 1.2892       | TRUE      |
| Exportin-1 OS=Mus musculus GN=Xpo1 PE=1 SV=1                                                    | Q6P5F9           | Xpo1         | 123 kDa | 3.6831       | 3.1957      | 5.3684       | 4.8999      | 7.3052       | TRUE      |
| Exportin-2 OS=Mus musculus GN=Cse1l PE=1 SV=1                                                   | Q9ERK4           | Cse1l        | 110 kDa | 9.2077       | 6.3914      | 3.5789       | 7.7582      | 6.8755       | TRUE      |
| F-actin-capping protein subunit alpha-1 OS=Mus musculus GN=Capza1 PE=1 SV=4                     | P47753 (+2)      | Capza1       | 33 kDa  | 0            | 4.7936      | 5.3684       | 3.2666      | 2.5783       | TRUE      |
| F-actin-capping protein subunit alpha-2 OS=Mus musculus GN=Capza2 PE=1 SV=3                     | P47754 (+2)      | Capza2       | 33 kDa  | 5.5246       | 4.7936      | 5.3684       | 4.4916      | 2.1486       | TRUE      |
| F-box-like/WD repeat-containing protein TBL1X OS=Mus musculus GN=Tbl1x PE=1 SV=2                | Q9QXE7           | Tbl1x        | 57 kDa  | 7.3662       | 3.1957      | 7.1579       | 0           | 3.4377       | TRUE      |
| Family with sequence similarity 171, member A1 OS=Mus musculus GN=Fam171a1 PE=1 SV=1            | A2ATK9           | Fam171a1     | 98 kDa  | 14.732       | 7.9893      | 7.1579       | 0           | 0            | TRUE      |
| Fascin OS=Mus musculus GN=Fscn1 PE=1 SV=4                                                       | Q61553           | Fscn1        | 55 kDa  | 9.2077       | 9.5872      | 10.737       | 10.616      | 14.61        | TRUE      |
| FAT atypical cadherin 1 OS=Mus musculus GN=Fat1 PE=1 SV=1                                       | F2Z4A3           | Fat1         | 506 kDa | 47.88        | 67.11       | 42.947       | 0           | 0            | TRUE      |
| Fatty acid synthase OS=Mus musculus GN=Fasn PE=1 SV=2                                           | P19096           | Fasn         | 272 kDa | 14.732       | 17.576      | 30.421       | 23.275      | 30.51        | TRUE      |
| Fatty acyl-CoA reductase 1 OS=Mus musculus GN=Far1 PE=1 SV=1                                    | Q922J9           | Far1         | 59 kDa  | 3.6831       | 4.7936      | 5.3684       | 1.6333      | 2.5783       | TRUE      |
| FERM domain-containing protein 4A OS=Mus musculus GN=Frmd4a PE=1 SV=1                           | H3BIZ7 (+1)      | Frmd4a       | 115 kDa | 5.5246       | 0           | 0            | 0           | 0            | TRUE      |
| FERM, ARHGEF and pleckstrin domain-containing protein 1 OS=Mus musculus GN=Farp1 PE=1 SV=1      | F8VPU2           | Farp1        | 119 kDa | 9.2077       | 7.9893      | 14.316       | 5.3082      | 6.0161       | TRUE      |
| Ferritin heavy chain OS=Mus musculus GN=Fth1 PE=1 SV=2                                          | P09528           | Fth1         | 21 kDa  | 3.6831       | 3.1957      | 5.3684       | 0           | 0.85944      | TRUE      |
| Fibroblast growth factor receptor OS=Mus musculus GN=Fgfr2 PE=2 SV=1                            | A1YYN6 (+2)      | Fgfr2        | 92 kDa  | 0            | 4.7936      | 0            | 0           | 0            | TRUE      |
| Fibronectin OS=Mus musculus GN=Fn1 PE=1 SV=1                                                    | Q3UHL6           | Fn1          | 260 kDa | 3.6831       | 11.185      | 5.3684       | 3.6749      | 1.7189       | TRUE      |

| Identified Proteins (2666)                                                                 | Accession Number | Alternate ID | MW      | VPSko-biotin | ctrl-biotin | VPSoe-biotin | ctrl lysate | VPSoe lysate | enriched? |
|--------------------------------------------------------------------------------------------|------------------|--------------|---------|--------------|-------------|--------------|-------------|--------------|-----------|
| Fibulin-1 OS=Mus musculus GN=Fbln1 PE=2 SV=1                                               | Q3TWK8           | Fbln1        | 78 kDa  | 0            | 3.1957      | 0            | 0           | 0            | TRUE      |
| Fibulin-2 OS=Mus musculus GN=Fbln2 PE=1 SV=2                                               | P37889 (+1)      | Fbln2        | 132 kDa | 12.891       | 17.576      | 17.895       | 2.8583      | 4.2972       | TRUE      |
| Filamin A-interacting protein 1-like OS=Mus musculus GN=Filip1l PE=1 SV=2                  | Q6P6L0           | Filip1l      | 130 kDa | 0            | 0           | 3.5789       | 2.8583      | 2.5783       | TRUE      |
| Filamin-A OS=Mus musculus GN=Flna PE=1 SV=5                                                | Q8BTM8           | Flna         | 281 kDa | 82.87        | 116.64      | 105.58       | 84.932      | 83.795       | TRUE      |
| Filamin-B OS=Mus musculus GN=Flnb PE=1 SV=3                                                | Q80X90           | Flnb         | 278 kDa | 46.039       | 49.534      | 51.895       | 51.449      | 64.028       | TRUE      |
| Fractalkine OS=Mus musculus GN=Cx3cd1 PE=1 SV=3                                            | O35188 (+1)      | Cx3cd1       | 42 kDa  | 0            | 4.7936      | 7.1579       | 1.6333      | 1.7189       | TRUE      |
| Fragile X mental retardation syndrome-related protein 1 OS=Mus musculus GN=Fxr1 PE=1 SV=2  | Q61584           | Fxr1         | 76 kDa  | 7.3662       | 3.1957      | 5.3684       | 2.8583      | 2.5783       | TRUE      |
| Galectin (Fragment) OS=Mus musculus GN=Lgals3 PE=2 SV=1                                    | Q3V471 (+1)      | Lgals3       | 20 kDa  | 3.6831       | 4.7936      | 5.3684       | 2.8583      | 3.8675       | TRUE      |
| Galectin OS=Mus musculus GN=Lgals8 PE=1 SV=1                                               | Q542M5 (+1)      | Lgals8       | 36 kDa  | 0            | 3.1957      | 0            | 0.81665     | 0            | TRUE      |
| Galectin OS=Mus musculus GN=Lgals9 PE=1 SV=1                                               | B1AQR8 (+1)      | Lgals9       | 40 kDa  | 11.049       | 17.576      | 7.1579       | 2.8583      | 0.85944      | TRUE      |
| Galectin-1 OS=Mus musculus GN=Lgals1 PE=1 SV=3                                             | P16045           | Lgals1       | 15 kDa  | 22.099       | 15.979      | 12.526       | 20.416      | 24.064       | TRUE      |
| General transcription factor II-I OS=Mus musculus GN=Gtf2i PE=1 SV=1                       | G3UYD0 (+1)      | Gtf2i        | 103 kDa | 7.3662       | 0           | 8.9474       | 1.6333      | 2.1486       | TRUE      |
| GLI-Kruppel family member GLI3 OS=Mus musculus GN=Gli3 PE=2 SV=1                           | B2RUG4 (+1)      | Gli3         | 172 kDa | 7.3662       | 3.1957      | 5.3684       | 0           | 0.85944      | TRUE      |
| Glucosidase 2 subunit beta OS=Mus musculus GN=Prkcsh PE=1 SV=1                             | O08795 (+1)      | Prkcsh       | 59 kDa  | 0            | 9.5872      | 14.316       | 5.3082      | 6.8755       | TRUE      |
| Glutamate dehydrogenase 1, mitochondrial OS=Mus musculus GN=Glud1 PE=1 SV=1                | P26443           | Glud1        | 61 kDa  | 11.049       | 14.381      | 26.842       | 10.616      | 13.321       | TRUE      |
| Glutamate-cysteine ligase regulatory subunit OS=Mus musculus GN=Gclm PE=1 SV=1             | O09172 (+2)      | Gclm         | 31 kDa  | 0            | 0           | 5.3684       | 2.0416      | 1.2892       | TRUE      |
| Glutamine-tRNA ligase OS=Mus musculus GN=Qars PE=1 SV=2                                    | D3Z158 (+1)      | Qars         | 85 kDa  | 0            | 4.7936      | 3.5789       | 4.0833      | 5.1566       | TRUE      |
| Glutathione S-transferase P 1 OS=Mus musculus GN=Gstp1 PE=1 SV=2                           | P19157           | Gstp1        | 24 kDa  | 3.6831       | 0           | 7.1579       | 4.8999      | 5.5863       | TRUE      |
| Glycerol-3-phosphate dehydrogenase OS=Mus musculus GN=Gpd2 PE=1 SV=1                       | A2AQR0 (+1)      | Gpd2         | 83 kDa  | 7.3662       | 4.7936      | 3.5789       | 4.4916      | 3.8675       | TRUE      |
| Glypican 1, isoform CRA_c OS=Mus musculus GN=Gpc1 PE=1 SV=1                                | Q3U379 (+1)      | Gpc1         | 61 kDa  | 0            | 0           | 5.3684       | 0           | 0            | TRUE      |
| Glypican-4 OS=Mus musculus GN=Gpc4 PE=1 SV=2                                               | P51655           | Gpc4         | 63 kDa  | 9.2077       | 12.783      | 7.1579       | 0.81665     | 0            | TRUE      |
| GRB10-interacting GYF protein 1 OS=Mus musculus GN=Gigyf1 PE=1 SV=2                        | Q99MR1           | Gigyf1       | 116 kDa | 14.732       | 7.9893      | 14.316       | 0           | 0            | TRUE      |
| GRB10-interacting GYF protein 2 OS=Mus musculus GN=Gigyf2 PE=1 SV=1                        | Q3UYG6 (+1)      | Gigyf2       | 149 kDa | 18.415       | 12.783      | 19.684       | 2.0416      | 1.7189       | TRUE      |
| GTP-binding nuclear protein Ran OS=Mus musculus GN=Ran PE=2 SV=1                           | Q3ULW0           | Ran          | 24 kDa  | 7.3662       | 4.7936      | 10.737       | 7.7582      | 8.5944       | TRUE      |
| GTP-binding protein SAR1a OS=Mus musculus GN=Sar1a PE=1 SV=1                               | Q99JZ4           | Sar1a        | 22 kDa  | 0            | 3.1957      | 3.5789       | 1.6333      | 1.7189       | TRUE      |
| Guanine nucleotide-binding protein G(i) subunit alpha-2 OS=Mus musculus GN=Gnai2 PE=1 SV=5 | P08752           | Gnai2        | 40 kDa  | 0            | 4.7936      | 0            | 3.2666      | 3.008        | TRUE      |
| H-2 class I histocompatibility antigen, D-B alpha chain OS=Mus musculus GN=H2-D1 PE=1 SV=2 | P01899 (+2)      | H2-D1        | 41 kDa  | 38.672       | 51.132      | 10.737       | 8.1665      | 2.1486       | TRUE      |
| Heat shock protein 1 (Chaperonin 10) OS=Mus musculus GN=Hspe1 PE=1 SV=1                    | Q4KL76 (+1)      | Hspe1        | 11 kDa  | 7.3662       | 6.3914      | 14.316       | 3.6749      | 2.5783       | TRUE      |
| Heat shock protein beta-1 OS=Mus musculus GN=Hspb1 PE=1 SV=3                               | P14602 (+1)      | Hspb1        | 23 kDa  | 0            | 3.1957      | 3.5789       | 0           | 0            | TRUE      |
| Heat shock protein beta-6 OS=Mus musculus GN=Hspb6 PE=1 SV=1                               | Q5EBG6           | Hspb6        | 18 kDa  | 0            | 3.1957      | 0            | 0           | 0            | TRUE      |
| Heat shock protein HSP 90-alpha OS=Mus musculus GN=Hsp90aa1 PE=1 SV=4                      | P07901 (+1)      | Hsp90aa1     | 85 kDa  | 33.148       | 30.359      | 41.158       | 36.749      | 49.847       | TRUE      |
| Heat shock protein HSP 90-beta OS=Mus musculus GN=Hsp90ab1 PE=1 SV=3                       | P11499 (+1)      | Hsp90ab1     | 83 kDa  | 53.405       | 46.338      | 62.632       | 54.716      | 69.185       | TRUE      |
| Helicase-like transcription factor OS=Mus musculus GN=Hltf PE=1 SV=1                       | Q6PCN7           | Hltf         | 113 kDa | 0            | 0           | 5.3684       | 0           | 0            | TRUE      |
| Hepatocyte growth factor OS=Mus musculus GN=Hgf PE=1 SV=1                                  | Q08048 (+1)      | Hgf          | 83 kDa  | 0            | 3.1957      | 0            | 0           | 0            | TRUE      |
| Heterogeneous nuclear ribonucleoprotein A/B OS=Mus musculus GN=Hnrnpab PE=1 SV=1           | Q20BD0 (+2)      | Hnrnpab      | 36 kDa  | 7.3662       | 7.9893      | 10.737       | 3.6749      | 3.8675       | TRUE      |
| Heterogeneous nuclear ribonucleoprotein A0 OS=Mus musculus GN=Hnrnpa0 PE=1 SV=1            | Q9CX86           | Hnrnpa0      | 31 kDa  | 0            | 0           | 3.5789       | 2.0416      | 1.7189       | TRUE      |
| Heterogeneous nuclear ribonucleoprotein F OS=Mus musculus GN=Hnrnpf PE=1 SV=3              | Q9Z2X1           | Hnrnpf       | 46 kDa  | 9.2077       | 4.7936      | 3.5789       | 4.4916      | 6.4458       | TRUE      |
| Heterogeneous nuclear ribonucleoprotein H OS=Mus musculus GN=HnrnpH1 PE=1 SV=3             | O35737 (+2)      | HnrnpH1      | 49 kDa  | 9.2077       | 9.5872      | 8.9474       | 2.45        | 4.2972       | TRUE      |
| Heterogeneous nuclear ribonucleoprotein Q OS=Mus musculus GN=Syncrip PE=1 SV=1             | A0A0R4J259       | Syncrip      | 63 kDa  | 5.5246       | 6.3914      | 3.5789       | 6.1249      | 4.7269       | TRUE      |
| Heterogeneous nuclear ribonucleoproteins A2/B1 OS=Mus musculus GN=Hnrnpa2b1 PE=1 SV=2      | O88569           | Hnrnpa2b1    | 37 kDa  | 5.5246       | 3.1957      | 3.5789       | 3.2666      | 3.008        | TRUE      |
| Hexokinase-2 OS=Mus musculus GN=Hk2 PE=1 SV=1                                              | O08528           | Hk2          | 103 kDa | 5.5246       | 0           | 0            | 4.8999      | 6.0161       | TRUE      |
| High affinity copper uptake protein 1 OS=Mus musculus GN=Slc31a1 PE=1 SV=1                 | A8Y5P1 (+2)      | Slc31a1      | 14 kDa  | 0            | 3.1957      | 0            | 0           | 0            | TRUE      |
| High mobility group protein B1 OS=Mus musculus GN=Hmgb1 PE=1 SV=2                          | P63158 (+1)      | Hmgb1        | 25 kDa  | 9.2077       | 6.3914      | 17.895       | 16.741      | 21.056       | TRUE      |
| High mobility group protein B2 OS=Mus musculus GN=Hmgb2 PE=1 SV=3                          | P30681           | Hmgb2        | 24 kDa  | 12.891       | 0           | 8.9474       | 12.25       | 16.329       | TRUE      |
| Histidine ammonia-lyase OS=Mus musculus GN=Hal PE=1 SV=1                                   | B2RXW1 (+2)      | Hal          | 72 kDa  | 0            | 3.1957      | 0            | 0           | 0            | TRUE      |
| Histidine triad nucleotide-binding protein 1 OS=Mus musculus GN=Hint1 PE=1 SV=3            | P70349           | Hint1        | 14 kDa  | 0            | 0           | 3.5789       | 2.0416      | 1.2892       | TRUE      |
| Histone acetyltransferase p300 OS=Mus musculus GN=Ep300 PE=1 SV=2                          | B2RWS6           | Ep300        | 263 kDa | 3.6831       | 3.1957      | 3.5789       | 0           | 0            | TRUE      |
| Histone deacetylase 1 OS=Mus musculus GN=Hdac1 PE=1 SV=1                                   | O09106 (+1)      | Hdac1        | 55 kDa  | 3.6831       | 3.1957      | 0            | 1.6333      | 2.5783       | TRUE      |
| Histone deacetylase 6 (Fragment) OS=Mus musculus GN=Hdac6 PE=1 SV=1                        | A0A1B0GX25 (+3)  | Hdac6        | 110 kDa | 3.6831       | 0           | 3.5789       | 2.0416      | 2.1486       | TRUE      |
| Histone H2A OS=Mus musculus GN=Hist2h2aa1 PE=2 SV=1                                        | B2RWH3 (+4)      | Hist2h2aa1   | 14 kDa  | 5.5246       | 3.1957      | 5.3684       | 0           | 0            | TRUE      |
| Histone H2B type 2-B OS=Mus musculus GN=Hist2h2bb PE=1 SV=3                                | Q64525           | Hist2h2bb    | 14 kDa  | 5.5246       | 4.7936      | 7.1579       | 0           | 0            | TRUE      |



| Identified Proteins (2666)                                                                     | Accession Number | Alternate ID | MW      | VPSko-biotin | ctrl-biotin | VPSoe-biotin | ctrl lysate | VPSoe lysate | enriched? |
|------------------------------------------------------------------------------------------------|------------------|--------------|---------|--------------|-------------|--------------|-------------|--------------|-----------|
| Histone H4 OS=Mus musculus GN=Hist2h4 PE=1 SV=1                                                | B2RTM0 (+1)      | Hist2h4      | 11 kDa  | 5.5246       | 0           | 3.5789       | 0           | 0.85944      | TRUE      |
| Histone-binding protein RBBP7 OS=Mus musculus GN=Rbbp7 PE=1 SV=1                               | A2AFJ1 (+1)      | Rbbp7        | 47 kDa  | 7.3662       | 7.9893      | 5.3684       | 4.0833      | 4.7269       | TRUE      |
| Hsc70-interacting protein OS=Mus musculus GN=St13 PE=1 SV=1                                    | F8WJK8 (+2)      | St13         | 41 kDa  | 9.2077       | 7.9893      | 8.9474       | 4.4916      | 5.5863       | TRUE      |
| Hypoxanthine-guanine phosphoribosyltransferase OS=Mus musculus GN=Hprt1 PE=1 SV=3              | P00493 (+1)      | Hprt1        | 25 kDa  | 0            | 3.1957      | 5.3684       | 3.2666      | 3.8675       | TRUE      |
| Immunoglobulin superfamily member 3 OS=Mus musculus GN=Igsf3 PE=1 SV=1                         | A0A0A6YX40 (+1)  | Igsf3        | 137 kDa | 3.6831       | 4.7936      | 8.9474       | 0           | 0            | TRUE      |
| Immunoglobulin superfamily member 8 OS=Mus musculus GN=Igsf8 PE=1 SV=1                         | A0A0R4J117 (+1)  | Igsf8        | 65 kDa  | 7.3662       | 7.9893      | 3.5789       | 1.225       | 0            | TRUE      |
| Importin subunit alpha-1 OS=Mus musculus GN=Kpna2 PE=1 SV=2                                    | P52293 (+1)      | Kpna2        | 58 kDa  | 0            | 7.9893      | 3.5789       | 4.0833      | 3.4377       | TRUE      |
| Importin subunit beta-1 OS=Mus musculus GN=Kpnb1 PE=1 SV=2                                     | P70168 (+2)      | Kpnb1        | 97 kDa  | 5.5246       | 9.5872      | 7.1579       | 10.208      | 6.8755       | TRUE      |
| Importin-4 OS=Mus musculus GN=Ipo4 PE=1 SV=1                                                   | Q8VI75           | Ipo4         | 119 kDa | 0            | 3.1957      | 5.3684       | 2.8583      | 2.5783       | TRUE      |
| Importin-5 OS=Mus musculus GN=Ipo5 PE=1 SV=3                                                   | Q8BKC5           | Ipo5         | 124 kDa | 14.732       | 14.381      | 21.474       | 14.7        | 15.9         | TRUE      |
| Inactive tyrosine-protein kinase 7 OS=Mus musculus GN=Ptk7 PE=1 SV=1                           | Q8BK63           | Ptk7         | 118 kDa | 62.613       | 54.327      | 46.526       | 3.6749      | 3.8675       | TRUE      |
| Inositol-1-monophosphatase OS=Mus musculus GN=Impa1 PE=2 SV=1                                  | Q3U5R8 (+2)      | Impa1        | 30 kDa  | 9.2077       | 6.3914      | 7.1579       | 1.225       | 2.5783       | TRUE      |
| Insulin receptor-related protein OS=Mus musculus GN=Insrr PE=1 SV=2                            | Q9WTL4           | Insrr        | 145 kDa | 3.6831       | 0           | 0            | 0           | 0            | TRUE      |
| Insulin-like growth factor 1 receptor OS=Mus musculus GN=Igf1r PE=1 SV=3                       | Q60751           | Igf1r        | 156 kDa | 5.5246       | 15.979      | 8.9474       | 0           | 0            | TRUE      |
| Insulin-like growth factor 2 mRNA-binding protein 2 OS=Mus musculus GN=Igf2bp2 PE=1 SV=1       | Q5SF07           | Igf2bp2      | 66 kDa  | 0            | 3.1957      | 0            | 2.0416      | 2.5783       | TRUE      |
| Insulin-like growth factor 2 mRNA-binding protein 3 OS=Mus musculus GN=Igf2bp3 PE=1 SV=1       | Q9CPN8           | Igf2bp3      | 64 kDa  | 7.3662       | 4.7936      | 3.5789       | 4.8999      | 5.5863       | TRUE      |
| Insulin-like growth factor 2 receptor OS=Mus musculus GN=Igf2r PE=2 SV=1                       | B9EKB8 (+1)      | Igf2r        | 274 kDa | 9.2077       | 4.7936      | 3.5789       | 5.3082      | 6.0161       | TRUE      |
| Integrin alpha-1 OS=Mus musculus GN=Itga1 PE=1 SV=2                                            | Q3V3R4           | Itga1        | 131 kDa | 0            | 11.185      | 0            | 0.81665     | 0            | TRUE      |
| Integrin alpha-11 OS=Mus musculus GN=Itga11 PE=1 SV=1                                          | A0A0B4J1F0 (+1)  | Itga11       | 133 kDa | 0            | 12.783      | 0            | 0           | 0            | TRUE      |
| Integrin alpha-3 OS=Mus musculus GN=Itga3 PE=1 SV=1                                            | Q62470           | Itga3        | 117 kDa | 23.94        | 15.979      | 21.474       | 2.45        | 3.8675       | TRUE      |
| Integrin alpha-5 OS=Mus musculus GN=Itga5 PE=1 SV=3                                            | P11688 (+1)      | Itga5        | 115 kDa | 53.405       | 63.914      | 48.316       | 5.3082      | 5.1566       | TRUE      |
| Integrin beta OS=Mus musculus GN=Itgb5 PE=1 SV=1                                               | Q6PE70           | Itgb5        | 88 kDa  | 12.891       | 15.979      | 19.684       | 1.6333      | 2.5783       | TRUE      |
| Integrin beta-1 OS=Mus musculus GN=Itgb1 PE=1 SV=1                                             | P09055           | Itgb1        | 88 kDa  | 33.148       | 46.338      | 30.421       | 8.5749      | 9.8835       | TRUE      |
| Inter alpha-trypsin inhibitor, heavy chain 4 OS=Mus musculus GN=Itih4 PE=1 SV=2                | A6X935 (+2)      | Itih4        | 105 kDa | 5.5246       | 0           | 0            | 0           | 0            | TRUE      |
| Inter-alpha trypsin inhibitor, heavy chain 2 OS=Mus musculus GN=Itih2 PE=1 SV=1                | G3X977 (+2)      | Itih2        | 106 kDa | 7.3662       | 4.7936      | 7.1579       | 0           | 0            | TRUE      |
| Interferon-activable protein 204 OS=Mus musculus GN=Ifi204 PE=1 SV=1                           | E9QKL6 (+1)      | Ifi204       | 69 kDa  | 3.6831       | 4.7936      | 0            | 7.3499      | 4.2972       | TRUE      |
| Interferon-activable protein 205-B OS=Mus musculus GN=Mnda PE=1 SV=1                           | P0DOV1           | Mnda         | 47 kDa  | 7.3662       | 11.185      | 7.1579       | 6.5332      | 4.7269       | TRUE      |
| Interferon-induced protein with tetratricopeptide repeats 1 OS=Mus musculus GN=Ifit1 PE=1 SV=1 | Q64282 (+1)      | Ifit1        | 54 kDa  | 0            | 6.3914      | 0            | 4.8999      | 0            | TRUE      |
| Interferon-induced transmembrane protein 3 OS=Mus musculus GN=Ifitm3 PE=1 SV=1                 | Q9CQW9           | Ifitm3       | 15 kDa  | 3.6831       | 6.3914      | 0            | 2.0416      | 1.7189       | TRUE      |
| Interferon-stimulated gene 20 kDa protein OS=Mus musculus GN=Isg20 PE=1 SV=1                   | Q9JL16           | Isg20        | 33 kDa  | 0            | 6.3914      | 0            | 0           | 0            | TRUE      |
| Interleukin-1 receptor accessory protein OS=Mus musculus GN=Il1rap PE=1 SV=1                   | Q61730           | Il1rap       | 66 kDa  | 3.6831       | 9.5872      | 5.3684       | 0           | 0            | TRUE      |
| Interleukin-6 receptor subunit beta OS=Mus musculus GN=Il6st PE=1 SV=1                         | V9GX00           | Il6st        | 95 kDa  | 0            | 6.3914      | 0            | 0.81665     | 0.85944      | TRUE      |
| Irgm1 OS=Mus musculus GN=OTTMUSPWKG00059374 PE=4 SV=1                                          | A0A1G5SJJ3 (+5)  | OTTMUSPWKG   | 47 kDa  | 0            | 3.1957      | 0            | 1.6333      | 0            | TRUE      |
| Isochorismatase domain-containing protein 1 OS=Mus musculus GN=Isoc1 PE=1 SV=1                 | Q91V64           | Isoc1        | 32 kDa  | 3.6831       | 0           | 3.5789       | 0.81665     | 0            | TRUE      |
| Isocitrate dehydrogenase [NAD] subunit, mitochondrial OS=Mus musculus GN=Ihd3b PE=1 SV=1       | Q91VA7           | Ihd3b        | 42 kDa  | 0            | 4.7936      | 5.3684       | 4.4916      | 3.8675       | TRUE      |
| Isoleucine-tRNA ligase, cytoplasmic OS=Mus musculus GN=lars PE=1 SV=2                          | Q8BU30           | lars         | 144 kDa | 20.257       | 19.174      | 16.105       | 14.7        | 14.181       | TRUE      |
| Junction plakoglobin OS=Mus musculus GN=Jup PE=1 SV=3                                          | Q02257           | Jup          | 82 kDa  | 22.099       | 23.968      | 16.105       | 2.0416      | 2.1486       | TRUE      |
| Keratin 16 OS=Mus musculus GN=Krt16 PE=1 SV=1                                                  | Q3SYP5 (+4)      | Krt16        | 52 kDa  | 75.503       | 33.555      | 44.737       | 2.45        | 2.1486       | TRUE      |
| Keratin 19 OS=Mus musculus GN=Krt19 PE=1 SV=1                                                  | B1AQ78 (+1)      | Krt19        | 45 kDa  | 33.148       | 17.576      | 0            | 0           | 0            | TRUE      |
| Keratin 5 OS=Mus musculus GN=Krt5 PE=1 SV=2                                                    | Q32P04 (+1)      | Krt5         | 62 kDa  | 73.662       | 60.719      | 41.158       | 2.8583      | 3.8675       | TRUE      |
| Keratin 77 OS=Mus musculus GN=Krt77 PE=2 SV=1                                                  | Q08EK4 (+2)      | Krt77        | 61 kDa  | 49.722       | 62.317      | 17.895       | 0           | 0            | TRUE      |
| Keratin 83 OS=Mus musculus GN=Krt83 PE=1 SV=1                                                  | E9Q1Y9           | Krt83        | 53 kDa  | 23.94        | 0           | 0            | 0           | 0            | TRUE      |
| Keratin 90 OS=Mus musculus GN=Krt90 PE=1 SV=1                                                  | E9QLZ0 (+1)      | Krt90        | 58 kDa  | 36.831       | 31.957      | 23.263       | 0           | 0            | TRUE      |
| Keratin Kb40 OS=Mus musculus GN=Krt78 PE=2 SV=1                                                | Q6IFT3           | Krt78        | 85 kDa  | 14.732       | 12.783      | 12.526       | 1.6333      | 2.5783       | TRUE      |
| Keratin, type I cuticular Ha3-II OS=Mus musculus GN=Krt33b PE=1 SV=2                           | Q61897           | Krt33b       | 46 kDa  | 27.623       | 0           | 0            | 0           | 0            | TRUE      |
| Keratin, type I cuticular Ha5 OS=Mus musculus GN=Krt35 PE=1 SV=1                               | Q49714           | Krt35        | 51 kDa  | 14.732       | 0           | 0            | 0           | 0            | TRUE      |
| Keratin, type I cytoskeletal 10 OS=Mus musculus GN=Krt10 PE=1 SV=1                             | A2A513           | Krt10        | 57 kDa  | 134.43       | 145.41      | 82.316       | 3.2666      | 6.4458       | TRUE      |
| Keratin, type I cytoskeletal 14 OS=Mus musculus GN=Krt14 PE=1 SV=2                             | Q61781           | Krt14        | 53 kDa  | 93.919       | 46.338      | 51.895       | 4.0833      | 4.2972       | TRUE      |
| Keratin, type I cytoskeletal 17 OS=Mus musculus GN=Krt17 PE=1 SV=3                             | Q9QWL7           | Krt17        | 48 kDa  | 77.345       | 35.153      | 51.895       | 3.6749      | 5.5863       | TRUE      |
| Keratin, type I cytoskeletal 42 OS=Mus musculus GN=Krt42 PE=1 SV=1                             | Q6IFX2           | Krt42        | 50 kDa  | 77.345       | 39.947      | 41.158       | 0           | 0            | TRUE      |
| Keratin, type II cuticular Hb2 OS=Mus musculus GN=Krt82 PE=1 SV=2                              | Q99M74           | Krt82        | 57 kDa  | 11.049       | 0           | 0            | 0           | 0            | TRUE      |

| Identified Proteins (2666)                                                                                                         | Accession Number | Alternate ID | MW      | VPSko-biotin | ctrl-biotin | VPSoe-biotin | ctrl lysate | VPSoe lysate | enriched? |
|------------------------------------------------------------------------------------------------------------------------------------|------------------|--------------|---------|--------------|-------------|--------------|-------------|--------------|-----------|
| Keratin, type II cuticular Hb5 OS=Mus musculus GN=Krt85 PE=1 SV=2                                                                  | Q9Z2T6           | Krt85        | 56 kDa  | 34.989       | 12.783      | 0            | 0           | 0            | TRUE      |
| Keratin, type II cytoskeletal 1 OS=Mus musculus GN=Krt1 PE=1 SV=4                                                                  | P04104           | Krt1         | 66 kDa  | 55.246       | 68.708      | 23.263       | 2.8583      | 3.4377       | TRUE      |
| Keratin, type II cytoskeletal 2 epidermal OS=Mus musculus GN=Krt2 PE=1 SV=1                                                        | Q3TTY5           | Krt2         | 71 kDa  | 49.722       | 55.925      | 44.737       | 2.45        | 3.008        | TRUE      |
| Keratin, type II cytoskeletal 2 oral OS=Mus musculus GN=Krt76 PE=1 SV=1                                                            | Q3UV17           | Krt76        | 63 kDa  | 36.831       | 28.762      | 0            | 0           | 0            | TRUE      |
| Keratin, type II cytoskeletal 6A OS=Mus musculus GN=Krt6a PE=1 SV=3                                                                | P50446           | Krt6a        | 59 kDa  | 77.345       | 59.121      | 46.526       | 2.0416      | 5.5863       | TRUE      |
| Keratin, type II cytoskeletal 73 OS=Mus musculus GN=Krt73 PE=1 SV=1                                                                | Q6NXH9           | Krt73        | 59 kDa  | 51.563       | 60.719      | 0            | 0           | 0            | TRUE      |
| Kin of IRRE-like protein 1 OS=Mus musculus GN=Kirrel1 PE=1 SV=1                                                                    | Q80W68           | Kirrel1      | 87 kDa  | 3.6831       | 3.1957      | 3.5789       | 0.81665     | 0.85944      | TRUE      |
| KN motif and ankyrin repeat domain-containing protein 2 OS=Mus musculus GN=Kank2 PE=1 SV=1                                         | Q8BX02           | Kank2        | 90 kDa  | 9.2077       | 7.9893      | 5.3684       | 1.6333      | 2.1486       | TRUE      |
| L-lactate dehydrogenase OS=Mus musculus GN=Ldha PE=1 SV=1                                                                          | A0A1B0GSX0 (+2)  | Ldha         | 40 kDa  | 22.099       | 25.566      | 25.053       | 18.783      | 21.056       | TRUE      |
| La-related protein 4 OS=Mus musculus GN=Larp4 PE=1 SV=1                                                                            | E9Q066 (+3)      | Larp4        | 80 kDa  | 3.6831       | 0           | 0            | 1.225       | 1.2892       | TRUE      |
| Laminin receptor (Fragment) OS=Mus musculus GN=Rpsa PE=2 SV=1                                                                      | B2CY77 (+1)      | Rpsa         | 33 kDa  | 11.049       | 11.185      | 14.316       | 6.5332      | 5.5863       | TRUE      |
| Large proline-rich protein BAG6 OS=Mus musculus GN=Bag6 PE=1 SV=1                                                                  | Q9Z1R2           | Bag6         | 121 kDa | 3.6831       | 0           | 3.5789       | 3.6749      | 2.1486       | TRUE      |
| Latent-transforming growth factor beta-binding protein 1 OS=Mus musculus GN=Ltbp1 PE=1 SV=1                                        | Q8CG19           | Ltbp1        | 187 kDa | 5.5246       | 4.7936      | 3.5789       | 1.225       | 2.1486       | TRUE      |
| Leucine-rich repeats and immunoglobulin-like domains protein 1 OS=Mus musculus GN=Lrig1 PE=1 SV=1                                  | P70193           | Lrig1        | 119 kDa | 12.891       | 6.3914      | 7.1579       | 0           | 0            | TRUE      |
| Leucyl-cystinyl aminopeptidase OS=Mus musculus GN=Lnppe PE=1 SV=1                                                                  | Q8C129           | Lnppe        | 117 kDa | 9.2077       | 3.1957      | 3.5789       | 2.8583      | 3.008        | TRUE      |
| LIM domain only 7 OS=Mus musculus GN=Lmo7 PE=1 SV=1                                                                                | E9PYF4           | Lmo7         | 193 kDa | 31.306       | 15.979      | 21.474       | 1.225       | 0.85944      | TRUE      |
| Lipoamide acyltransferase component of branched-chain alpha-keto acid dehydrogenase complex OS=Mus musculus GN=Lipoamide PE=1 SV=1 | P53395 (+1)      | Dbt          | 53 kDa  | 0            | 9.5872      | 3.5789       | 0           | 0            | TRUE      |
| Liprin-beta-1 OS=Mus musculus GN=Ppfbp1 PE=1 SV=3                                                                                  | Q8C8U0           | Ppfbp1       | 109 kDa | 5.5246       | 7.9893      | 10.737       | 6.1249      | 3.8675       | TRUE      |
| Long-chain-specific acyl-CoA dehydrogenase, mitochondrial OS=Mus musculus GN=Acadl PE=1 SV=1                                       | A0A0R4J083       | Acadl        | 48 kDa  | 0            | 4.7936      | 0            | 3.6749      | 3.008        | TRUE      |
| Low density lipoprotein receptor-related protein 1 OS=Mus musculus GN=Lrp1 PE=1 SV=1                                               | A0A0R4J0I9 (+1)  | Lrp1         | 505 kDa | 16.574       | 39.947      | 34           | 22.458      | 29.221       | TRUE      |
| Low-density lipoprotein receptor OS=Mus musculus GN=Ldlr PE=1 SV=2                                                                 | P35951 (+2)      | Ldlr         | 95 kDa  | 0            | 3.1957      | 0            | 0           | 1.2892       | TRUE      |
| Low-density lipoprotein receptor-related protein 6 OS=Mus musculus GN=Lrp6 PE=1 SV=1                                               | O88572           | Lrp6         | 180 kDa | 0            | 3.1957      | 0            | 0           | 0            | TRUE      |
| Lymphocyte antigen 75 OS=Mus musculus GN=Ly75 PE=1 SV=2                                                                            | Q60767           | Ly75         | 197 kDa | 29.465       | 25.566      | 34           | 2.45        | 3.8675       | TRUE      |
| Lysine-tRNA ligase OS=Mus musculus GN=Kars PE=1 SV=1                                                                               | Q3TIV6 (+2)      | Kars         | 68 kDa  | 9.2077       | 9.5872      | 12.526       | 6.5332      | 6.4458       | TRUE      |
| Macrophage colony-stimulating factor 1 OS=Mus musculus GN=Csf1 PE=1 SV=2                                                           | P07141 (+1)      | Csf1         | 61 kDa  | 0            | 4.7936      | 0            | 0           | 1.2892       | TRUE      |
| Macrophage migration inhibitory factor OS=Mus musculus GN=Mif PE=1 SV=2                                                            | P34884 (+1)      | Mif          | 13 kDa  | 3.6831       | 11.185      | 14.316       | 4.8999      | 2.5783       | TRUE      |
| Malate dehydrogenase, cytoplasmic OS=Mus musculus GN=Mdh1 PE=1 SV=3                                                                | P14152           | Mdh1         | 37 kDa  | 3.6831       | 0           | 3.5789       | 3.2666      | 3.4377       | TRUE      |
| Malate dehydrogenase, mitochondrial OS=Mus musculus GN=Mdh2 PE=1 SV=3                                                              | P08249           | Mdh2         | 36 kDa  | 5.5246       | 9.5872      | 10.737       | 10.208      | 11.173       | TRUE      |
| Mannose receptor, C type 2 OS=Mus musculus GN=Mrc2 PE=2 SV=1                                                                       | Q14AX9 (+1)      | Mrc2         | 167 kDa | 16.574       | 25.566      | 23.263       | 4.8999      | 4.7269       | TRUE      |
| Matrix remodeling-associated protein 8 OS=Mus musculus GN=Mxra8 PE=1 SV=1                                                          | Q9DBV4           | Mxra8        | 50 kDa  | 11.049       | 11.185      | 14.316       | 0           | 1.2892       | TRUE      |
| MCG1050220 OS=Mus musculus GN=Raver1 PE=2 SV=1                                                                                     | A0A158RFV1 (+1)  | Raver1       | 79 kDa  | 7.3662       | 7.9893      | 10.737       | 0.81665     | 0            | TRUE      |
| MCG116671 OS=Mus musculus GN=Gm11361 PE=3 SV=1                                                                                     | A0A1Y7VKY1 (+3)  | Gm11361      | 18 kDa  | 11.049       | 7.9893      | 10.737       | 2.8583      | 3.4377       | TRUE      |
| MCG123443 OS=Mus musculus GN=Rps16 PE=1 SV=1                                                                                       | A4FUS1 (+3)      | Rps16        | 16 kDa  | 16.574       | 9.5872      | 16.105       | 4.0833      | 4.2972       | TRUE      |
| MCG124046 OS=Mus musculus GN=Prss1 PE=1 SV=1                                                                                       | Q9Z1R9           | Prss1        | 26 kDa  | 5.5246       | 6.3914      | 3.5789       | 0           | 0            | TRUE      |
| MCG133388, isoform CRA_n OS=Mus musculus GN=Pcdhgb6 PE=1 SV=1                                                                      | Q91XX4           | Pcdhgb6      | 101 kDa | 5.5246       | 9.5872      | 3.5789       | 0           | 0            | TRUE      |
| MCG13615, isoform CRA_a OS=Mus musculus GN=Rpl38 PE=1 SV=1                                                                         | Q52KP0 (+1)      | Rpl38        | 8 kDa   | 3.6831       | 4.7936      | 3.5789       | 0.81665     | 0.85944      | TRUE      |
| MCG16669, isoform CRA_b OS=Mus musculus GN=Tardbp PE=1 SV=1                                                                        | Q544R5 (+1)      | Tardbp       | 45 kDa  | 0            | 3.1957      | 3.5789       | 2.8583      | 2.5783       | TRUE      |
| MCG16976, isoform CRA_c OS=Mus musculus GN=Rpl22l1 PE=2 SV=1                                                                       | Q0VBA4 (+1)      | Rpl22l1      | 14 kDa  | 5.5246       | 0           | 0            | 0           | 0            | TRUE      |
| MCG17786, isoform CRA_a OS=Mus musculus GN=Rfc3 PE=1 SV=1                                                                          | Q3TKD1 (+1)      | Rfc3         | 41 kDa  | 0            | 0           | 3.5789       | 0.81665     | 0            | TRUE      |
| MCG2244 OS=Mus musculus GN=Zfp703 PE=2 SV=1                                                                                        | F6M3K1 (+1)      | Zfp703       | 59 kDa  | 3.6831       | 0           | 3.5789       | 0           | 0            | TRUE      |
| MCG2960, isoform CRA_b OS=Mus musculus GN=Steap2 PE=1 SV=1                                                                         | B2RX33 (+1)      | Steap2       | 56 kDa  | 12.891       | 9.5872      | 7.1579       | 0.81665     | 0            | TRUE      |
| MCG5400 OS=Mus musculus GN=Myl12a PE=1 SV=1                                                                                        | Q6ZWQ9           | Myl12a       | 20 kDa  | 11.049       | 15.979      | 12.526       | 4.8999      | 6.8755       | TRUE      |
| MCG68069 OS=Mus musculus GN=Npm1 PE=1 SV=1                                                                                         | Q5SQB7 (+1)      | Npm1         | 33 kDa  | 0            | 3.1957      | 5.3684       | 4.8999      | 3.8675       | TRUE      |
| Medium-chain specific acyl-CoA dehydrogenase, mitochondrial OS=Mus musculus GN=Acadm PE=1 SV=1                                     | P45952 (+1)      | Acadm        | 46 kDa  | 0            | 0           | 3.5789       | 1.225       | 2.1486       | TRUE      |
| Membrane-associated progesterone receptor component 1 OS=Mus musculus GN=Pgrmc1 PE=1 SV=1                                          | O55022 (+2)      | Pgrmc1       | 22 kDa  | 0            | 4.7936      | 0            | 0.81665     | 1.2892       | TRUE      |
| Metal transporter CNNM4 OS=Mus musculus GN=Cnm4 PE=1 SV=2                                                                          | Q69ZF7           | Cnm4         | 87 kDa  | 0            | 4.7936      | 5.3684       | 0           | 0            | TRUE      |
| Metalloreductase STEAP4 OS=Mus musculus GN=Steap4 PE=1 SV=1                                                                        | Q923B6           | Steap4       | 53 kDa  | 5.5246       | 4.7936      | 3.5789       | 0           | 0            | TRUE      |
| Methylcrotonoyl-CoA carboxylase subunit alpha, mitochondrial OS=Mus musculus GN=Mccc1 PE=1 SV=1                                    | Q99MR8           | Mccc1        | 79 kDa  | 57.088       | 44.74       | 39.368       | 0           | 0            | TRUE      |
| Methylcrotonoyl-Coenzyme A carboxylase 2 (Beta) OS=Mus musculus GN=Mccc2 PE=1 SV=1                                                 | B2RUK5 (+1)      | Mccc2        | 61 kDa  | 29.465       | 20.772      | 25.053       | 0           | 1.7189       | TRUE      |
| MICOS complex subunit MIC13 OS=Mus musculus GN=Mic13 PE=1 SV=1                                                                     | Q8R404           | Mic13        | 13 kDa  | 3.6831       | 0           | 0            | 0           | 0            | TRUE      |
| Microtubule-associated protein 1B OS=Mus musculus GN=Map1b PE=2 SV=1                                                               | B2RQQ5 (+1)      | Map1b        | 270 kDa | 7.3662       | 3.1957      | 0            | 5.3082      | 9.8835       | TRUE      |

| Identified Proteins (2666)                                                                                      | Accession Number | Alternate ID | MW      | VPSko-biotin | ctrl-biotin | VPSoe-biotin | ctrl lysate | VPSoe lysate | enriched? |
|-----------------------------------------------------------------------------------------------------------------|------------------|--------------|---------|--------------|-------------|--------------|-------------|--------------|-----------|
| Mitochondrial carrier homolog 2 OS=Mus musculus GN=Mtch2 PE=1 SV=1                                              | Q791V5           | Mtch2        | 33 kDa  | 5.5246       | 7.9893      | 7.1579       | 2.45        | 2.1486       | TRUE      |
| Mitochondrial dicarboxylate carrier OS=Mus musculus GN=Slc25a10 PE=1 SV=2                                       | Q9QZD8           | Slc25a10     | 32 kDa  | 3.6831       | 6.3914      | 7.1579       | 1.225       | 0            | TRUE      |
| Mitochondrial fission regulator 1-like OS=Mus musculus GN=Mtfr1l PE=1 SV=1                                      | Q9CWE0           | Mtfr1l       | 32 kDa  | 3.6831       | 3.1957      | 0            | 0           | 0            | TRUE      |
| Mitochondrial import inner membrane translocase subunit Tim23 OS=Mus musculus GN=Timm23 PE=1 SV=1               | Q9WTK8           | Timm23       | 22 kDa  | 7.3662       | 6.3914      | 3.5789       | 1.225       | 1.2892       | TRUE      |
| MKIAA0051 protein (Fragment) OS=Mus musculus GN=Iqgap1 PE=2 SV=1                                                | Q6ZQK2 (+1)      | Iqgap1       | 191 kDa | 7.3662       | 17.576      | 7.1579       | 17.966      | 14.181       | TRUE      |
| MKIAA0106 protein (Fragment) OS=Mus musculus GN=Prdx6 PE=2 SV=1                                                 | Q6A0D0 (+1)      | Prdx6        | 25 kDa  | 0            | 0           | 7.1579       | 6.1249      | 5.5863       | TRUE      |
| MKIAA0791 protein (Fragment) OS=Mus musculus GN=Nup155 PE=2 SV=1                                                | Q6ZQ45           | Nup155       | 159 kDa | 0            | 0           | 3.5789       | 3.6749      | 3.008        | TRUE      |
| MKIAA4115 protein (Fragment) OS=Mus musculus GN=G3bp1 PE=2 SV=1                                                 | Q571F9           | G3bp1        | 56 kDa  | 7.3662       | 6.3914      | 10.737       | 6.5332      | 6.0161       | TRUE      |
| Moesin OS=Mus musculus GN=Msn PE=1 SV=3                                                                         | P26041           | Msn          | 68 kDa  | 12.891       | 25.566      | 32.211       | 23.683      | 20.197       | TRUE      |
| Monocarboxylate transporter 1 OS=Mus musculus GN=Slc16a1 PE=1 SV=1                                              | P53986 (+2)      | Slc16a1      | 53 kDa  | 12.891       | 11.185      | 10.737       | 2.0416      | 3.008        | TRUE      |
| Monocarboxylate transporter 4 OS=Mus musculus GN=Slc16a3 PE=1 SV=1                                              | P57787 (+2)      | Slc16a3      | 50 kDa  | 20.257       | 22.37       | 14.316       | 1.6333      | 1.7189       | TRUE      |
| Mutant fibrillin-1 OS=Mus musculus GN=Fbn1 PE=2 SV=1                                                            | O88840 (+1)      | Fbn1         | 418 kDa | 3.6831       | 0           | 3.5789       | 0           | 1.7189       | TRUE      |
| Myoferlin OS=Mus musculus GN=Myof PE=1 SV=2                                                                     | Q69ZN7           | Myof         | 233 kDa | 3.6831       | 17.576      | 25.053       | 21.641      | 22.345       | TRUE      |
| Myosin light polypeptide 6 OS=Mus musculus GN=Myl6 PE=1 SV=1                                                    | A0A1W2P6F6 (+3)  | Myl6         | 17 kDa  | 14.732       | 12.783      | 8.9474       | 4.8999      | 4.7269       | TRUE      |
| Myosin-9 OS=Mus musculus GN=Myh9 PE=1 SV=4                                                                      | Q8VDD5           | Myh9         | 226 kDa | 51.563       | 89.48       | 75.158       | 77.582      | 62.309       | TRUE      |
| N-acetylated alpha-linked acidic dipeptidase 2 OS=Mus musculus GN=Naalad2 PE=2 SV=1                             | Q32MS9 (+2)      | Naalad2      | 83 kDa  | 49.722       | 49.534      | 50.105       | 6.5332      | 3.8675       | TRUE      |
| N-myc downstream regulated gene 1 OS=Mus musculus GN=Ndrgr1 PE=2 SV=1                                           | B7ZWC0 (+3)      | Ndrgr1       | 43 kDa  | 0            | 0           | 5.3684       | 1.6333      | 5.1566       | TRUE      |
| NADH dehydrogenase [ubiquinone] 1 alpha subcomplex subunit 13 OS=Mus musculus GN=Ndufa13 PE=1 SV=1              | Q9ERS2           | Ndufa13      | 17 kDa  | 3.6831       | 3.1957      | 3.5789       | 1.225       | 0.85944      | TRUE      |
| NADH dehydrogenase [ubiquinone] 1 alpha subcomplex subunit 9, mitochondrial OS=Mus musculus GN=Ndufa9 PE=1 SV=1 | A0A0R3P9C8 (+1)  | Ndufa9       | 42 kDa  | 3.6831       | 3.1957      | 0            | 1.6333      | 1.2892       | TRUE      |
| NADH dehydrogenase [ubiquinone] iron-sulfur protein 3, mitochondrial OS=Mus musculus GN=Ndufs3 PE=1 SV=1        | Q9DCT2           | Ndufs3       | 30 kDa  | 0            | 6.3914      | 0            | 0           | 0            | TRUE      |
| Nascent polypeptide-associated complex subunit alpha, muscle-specific form OS=Mus musculus GN=Naca PE=1 SV=1    | P70670           | Naca         | 220 kDa | 0            | 3.1957      | 3.5789       | 3.2666      | 4.7269       | TRUE      |
| Natriuretic peptide receptor 3 OS=Mus musculus GN=Npr3 PE=2 SV=1                                                | Q7TMG7           | Npr3         | 60 kDa  | 14.732       | 14.381      | 8.9474       | 1.225       | 0            | TRUE      |
| Nckap1 protein (Fragment) OS=Mus musculus GN=Nckap1 PE=2 SV=1                                                   | A110U6 (+2)      | Nckap1       | 129 kDa | 3.6831       | 3.1957      | 3.5789       | 2.8583      | 0.85944      | TRUE      |
| Neural cell adhesion molecule 1 OS=Mus musculus GN=Ncam1 PE=1 SV=3                                              | P13595           | Ncam1        | 119 kDa | 51.563       | 65.512      | 44.737       | 3.6749      | 3.4377       | TRUE      |
| Neurogenic locus notch homolog protein 2 OS=Mus musculus GN=Notch2 PE=1 SV=1                                    | G5E8J0           | Notch2       | 266 kDa | 36.831       | 39.947      | 48.316       | 3.2666      | 3.8675       | TRUE      |
| Neuropilin-2 OS=Mus musculus GN=Nrp2 PE=1 SV=2                                                                  | O35375 (+1)      | Nrp2         | 105 kDa | 12.891       | 4.7936      | 8.9474       | 0           | 0            | TRUE      |
| NIN1/RPN12 binding protein 1 homolog (S. cerevisiae) OS=Mus musculus GN=Nob1 PE=2 SV=1                          | Q148S3 (+1)      | Nob1         | 45 kDa  | 0            | 0           | 5.3684       | 1.225       | 0.85944      | TRUE      |
| Nuclear factor 1 (Fragment) OS=Mus musculus GN=Nfix PE=1 SV=1                                                   | D3Y200 (+3)      | Nfix         | 53 kDa  | 3.6831       | 3.1957      | 3.5789       | 0.81665     | 0            | TRUE      |
| Nuclear migration protein nudC OS=Mus musculus GN=Nudc PE=1 SV=1                                                | O35685           | Nudc         | 38 kDa  | 3.6831       | 3.1957      | 3.5789       | 3.6749      | 3.8675       | TRUE      |
| Nuclear pore complex protein Nup214 OS=Mus musculus GN=Nup214 PE=1 SV=2                                         | Q80U93           | Nup214       | 213 kDa | 23.94        | 4.7936      | 5.3684       | 0           | 0            | TRUE      |
| Nuclear pore complex protein Nup93 OS=Mus musculus GN=Nup93 PE=1 SV=1                                           | Q8BJ71           | Nup93        | 93 kDa  | 11.049       | 0           | 0            | 2.0416      | 2.1486       | TRUE      |
| Nuclear pore complex protein Nup98-Nup96 OS=Mus musculus GN=Nup98 PE=1 SV=2                                     | Q6PFD9           | Nup98        | 197 kDa | 12.891       | 6.3914      | 0            | 0           | 0            | TRUE      |
| Nuclear receptor corepressor 2 OS=Mus musculus GN=Ncor2 PE=1 SV=1                                               | F8VQL9           | Ncor2        | 273 kDa | 0            | 0           | 3.5789       | 0           | 0            | TRUE      |
| Nuclease-sensitive element-binding protein 1 OS=Mus musculus GN=Ybx1 PE=1 SV=3                                  | P62960 (+3)      | Ybx1         | 36 kDa  | 11.049       | 9.5872      | 10.737       | 8.1665      | 6.4458       | TRUE      |
| Nucleoporin 88, isoform CRA_b OS=Mus musculus GN=Nup88 PE=2 SV=1                                                | Q5QNU0 (+1)      | Nup88        | 84 kDa  | 0            | 0           | 5.3684       | 0           | 0            | TRUE      |
| Nucleoside diphosphate kinase OS=Mus musculus GN=Gm20390 PE=3 SV=1                                              | E9PZF0           | Gm20390      | 30 kDa  | 9.2077       | 12.783      | 17.895       | 11.841      | 13.751       | TRUE      |
| Oncostatin-M-specific receptor subunit beta OS=Mus musculus GN=Osmr PE=1 SV=1                                   | O70458           | Osmr         | 110 kDa | 5.5246       | 9.5872      | 10.737       | 1.225       | 0            | TRUE      |
| Ornithine aminotransferase, mitochondrial OS=Mus musculus GN=Oat PE=1 SV=1                                      | P29758 (+1)      | Oat          | 48 kDa  | 3.6831       | 12.783      | 17.895       | 8.1665      | 7.7349       | TRUE      |
| OTU domain-containing protein 4 OS=Mus musculus GN=Otud4 PE=1 SV=1                                              | A0A0R4J260 (+1)  | Otud4        | 123 kDa | 5.5246       | 0           | 3.5789       | 0           | 0            | TRUE      |
| Palladin isoform OS=Mus musculus GN=Palld PE=2 SV=1                                                             | K0BWC3           | Palld        | 108 kDa | 16.574       | 12.783      | 16.105       | 8.1665      | 6.8755       | TRUE      |
| Pdk3 protein OS=Mus musculus GN=Pdk3 PE=1 SV=1                                                                  | Q4FJR4 (+1)      | Pdk3         | 48 kDa  | 3.6831       | 0           | 3.5789       | 1.225       | 1.7189       | TRUE      |
| Pentraxin-related protein PTX3 OS=Mus musculus GN=Ptx3 PE=1 SV=2                                                | P48759           | Ptx3         | 42 kDa  | 5.5246       | 3.1957      | 3.5789       | 0           | 0            | TRUE      |
| Peptidyl-prolyl cis-trans isomerase B OS=Mus musculus GN=Ppib PE=1 SV=2                                         | P24369 (+1)      | Ppib         | 24 kDa  | 12.891       | 7.9893      | 10.737       | 6.9416      | 6.0161       | TRUE      |
| Peptidyl-prolyl cis-trans isomerase C OS=Mus musculus GN=Ppic PE=1 SV=1                                         | P30412 (+1)      | Ppic         | 23 kDa  | 7.3662       | 3.1957      | 3.5789       | 2.45        | 2.5783       | TRUE      |
| Peptidyl-prolyl cis-trans isomerase FKBP1A OS=Mus musculus GN=Fkbp1a PE=1 SV=2                                  | P26883           | Fkbp1a       | 12 kDa  | 3.6831       | 3.1957      | 5.3684       | 4.8999      | 4.7269       | TRUE      |
| Peroxidasin homolog OS=Mus musculus GN=Pxdn PE=1 SV=1                                                           | A0A1W2P6L9 (+1)  | Pxdn         | 144 kDa | 0            | 6.3914      | 0            | 1.6333      | 2.1486       | TRUE      |
| Peroxiredoxin-1 OS=Mus musculus GN=Prdx1 PE=1 SV=1                                                              | P35700           | Prdx1        | 22 kDa  | 16.574       | 20.772      | 23.263       | 7.7582      | 10.743       | TRUE      |
| Peroxiredoxin-2 OS=Mus musculus GN=Prdx2 PE=1 SV=3                                                              | Q61171           | Prdx2        | 22 kDa  | 7.3662       | 6.3914      | 7.1579       | 5.7166      | 6.0161       | TRUE      |
| Peroxiredoxin-4 OS=Mus musculus GN=Prdx4 PE=1 SV=1                                                              | O08807           | Prdx4        | 31 kDa  | 12.891       | 15.979      | 14.316       | 7.7582      | 9.4538       | TRUE      |
| Peroxisomal targeting signal 1 receptor OS=Mus musculus GN=Pex5 PE=1 SV=1                                       | D3Z600 (+1)      | Pex5         | 70 kDa  | 0            | 0           | 3.5789       | 0.81665     | 0.85944      | TRUE      |
| PH domain leucine-rich repeat-containing protein phosphatase 1 OS=Mus musculus GN=Phlpp1 PE=1 SV=1              | Q8CHE4           | Phlpp1       | 182 kDa | 0            | 0           | 3.5789       | 0           | 0            | TRUE      |

| Identified Proteins (2666)                                                                     | Accession Number | Alternate ID | MW      | VPSko-biotin | ctrl-biotin | VPSoe-biotin | ctrl lysate | VPSoe lysate | enriched? |
|------------------------------------------------------------------------------------------------|------------------|--------------|---------|--------------|-------------|--------------|-------------|--------------|-----------|
| Phenylalanine-tRNA ligase alpha subunit OS=Mus musculus GN=Farsa PE=1 SV=1                     | E9PWY9 (+1)      | Farsa        | 57 kDa  | 12.891       | 0           | 10.737       | 2.0416      | 2.5783       | TRUE      |
| Phosphatidate cytidyltransferase, mitochondrial OS=Mus musculus GN=Tamm41 PE=1 SV=1            | G5E881 (+1)      | Tamm41       | 38 kDa  | 11.049       | 4.7936      | 5.3684       | 0           | 0            | TRUE      |
| Phosphatidylethanolamine-binding protein 1 OS=Mus musculus GN=Pebsp1 PE=1 SV=3                 | P70296 (+2)      | Pebsp1       | 21 kDa  | 3.6831       | 4.7936      | 5.3684       | 5.3082      | 6.4458       | TRUE      |
| Phosphatidylinositol phosphatase SAC1 OS=Mus musculus GN=Sacm1l PE=1 SV=1                      | Q9EP69           | Sacm1l       | 67 kDa  | 0            | 3.1957      | 0            | 2.8583      | 3.4377       | TRUE      |
| Phosphoenolpyruvate carboxykinase [GTP], mitochondrial OS=Mus musculus GN=Pck2 PE=1 SV=1       | A0A0R4J0G0 (+1)  | Pck2         | 73 kDa  | 7.3662       | 11.185      | 14.316       | 7.7582      | 7.3052       | TRUE      |
| Phosphoglycerate mutase OS=Mus musculus GN=Pgam1 PE=1 SV=1                                     | Q3U7Z6 (+1)      | Pgam1        | 29 kDa  | 5.5246       | 9.5872      | 16.105       | 12.25       | 9.8835       | TRUE      |
| Phosphomevalonate kinase OS=Mus musculus GN=Pmvk PE=1 SV=1                                     | D3YXP6 (+2)      | Pmvk         | 18 kDa  | 3.6831       | 0           | 0            | 1.225       | 1.2892       | TRUE      |
| Phosphoribosyl pyrophosphate synthetase 1-like 3 OS=Mus musculus GN=Prps1l3 PE=3 SV=1          | G3UXL2 (+2)      | Prps1l3      | 35 kDa  | 5.5246       | 0           | 3.5789       | 4.0833      | 5.5863       | TRUE      |
| Plakophilin-1 OS=Mus musculus GN=Pkp1 PE=1 SV=1                                                | P97350           | Pkp1         | 81 kDa  | 11.049       | 4.7936      | 7.1579       | 0           | 0            | TRUE      |
| Plasminogen activator inhibitor 1 OS=Mus musculus GN=Serpine1 PE=1 SV=1                        | G5E899           | Serpine1     | 45 kDa  | 23.94        | 25.566      | 17.895       | 0.81665     | 1.2892       | TRUE      |
| Plasminogen activator inhibitor 1 RNA-binding protein OS=Mus musculus GN=Serbp1 PE=1 SV=2      | Q9CY58           | Serbp1       | 45 kDa  | 0            | 9.5872      | 0            | 10.208      | 7.7349       | TRUE      |
| Plasminogen activator inhibitor 2, macrophage OS=Mus musculus GN=Serpinb2 PE=1 SV=1            | P12388 (+1)      | Serpinb2     | 46 kDa  | 0            | 3.1957      | 0            | 3.2666      | 0.85944      | TRUE      |
| Plastin-3 (Fragment) OS=Mus musculus GN=Pls3 PE=1 SV=1                                         | A0A1C7CYV0 (+2)  | Pls3         | 71 kDa  | 11.049       | 15.979      | 19.684       | 13.883      | 9.4538       | TRUE      |
| Platelet-derived growth factor receptor beta OS=Mus musculus GN=Pdgfrb PE=1 SV=1               | E9QN12 (+2)      | Pdgfrb       | 123 kDa | 7.3662       | 14.381      | 8.9474       | 2.45        | 1.7189       | TRUE      |
| Pleckstrin homology-like domain family B member 1 OS=Mus musculus GN=Phldb1 PE=1 SV=1          | Q6PDHO           | Phldb1       | 150 kDa | 5.5246       | 3.1957      | 8.9474       | 1.6333      | 0.85944      | TRUE      |
| Pleckstrin homology-like domain family B member 2 OS=Mus musculus GN=Phldb2 PE=1 SV=2          | Q8K1N2           | Phldb2       | 141 kDa | 7.3662       | 9.5872      | 3.5789       | 1.225       | 0.85944      | TRUE      |
| Plectin OS=Mus musculus GN=Plec PE=1 SV=3                                                      | Q9QXS1           | Plec         | 534 kDa | 0            | 7.9893      | 8.9474       | 2.8583      | 2.1486       | TRUE      |
| Plexin-A1 OS=Mus musculus GN=Plxn1 PE=1 SV=1                                                   | P70206           | Plxn1        | 211 kDa | 29.465       | 31.957      | 34           | 1.225       | 1.2892       | TRUE      |
| Plexin-B2 OS=Mus musculus GN=Plxb2 PE=1 SV=1                                                   | B2RXS4           | Plxb2        | 206 kDa | 44.197       | 51.132      | 50.105       | 5.3082      | 5.5863       | TRUE      |
| Poly [ADP-ribose] polymerase 2 OS=Mus musculus GN=Parp2 PE=1 SV=3                              | O88554           | Parp2        | 63 kDa  | 0            | 4.7936      | 5.3684       | 0.81665     | 1.2892       | TRUE      |
| Poly [ADP-ribose] polymerase OS=Mus musculus GN=Parp1 PE=2 SV=1                                | Q3TM68 (+2)      | Parp1        | 113 kDa | 0            | 0           | 3.5789       | 2.45        | 2.5783       | TRUE      |
| Poly(rC)-binding protein 1 OS=Mus musculus GN=Pcbp1 PE=1 SV=1                                  | P60335           | Pcbp1        | 37 kDa  | 11.049       | 6.3914      | 5.3684       | 6.5332      | 8.5944       | TRUE      |
| Poly(rC)-binding protein 2 OS=Mus musculus GN=Pcbp2 PE=1 SV=1                                  | Q61990           | Pcbp2        | 38 kDa  | 7.3662       | 7.9893      | 10.737       | 5.3082      | 7.7349       | TRUE      |
| Polyadenylate-binding protein 1 OS=Mus musculus GN=Pabpc1 PE=1 SV=2                            | P29341 (+1)      | Pabpc1       | 71 kDa  | 31.306       | 30.359      | 35.789       | 11.841      | 12.032       | TRUE      |
| Prelamin-A/C OS=Mus musculus GN=Lmna PE=1 SV=2                                                 | P48678           | Lmna         | 74 kDa  | 14.732       | 11.185      | 16.105       | 15.108      | 13.321       | TRUE      |
| Presequence protease, mitochondrial OS=Mus musculus GN=Pitrm1 PE=1 SV=1                        | Q8K411           | Pitrm1       | 117 kDa | 0            | 6.3914      | 8.9474       | 8.1665      | 6.8755       | TRUE      |
| Procollagen C-endopeptidase enhancer protein OS=Mus musculus GN=Pcolce PE=1 SV=1               | Q3UIP2 (+1)      | Pcolce       | 50 kDa  | 5.5246       | 6.3914      | 0            | 3.2666      | 3.4377       | TRUE      |
| Procollagen-lysine,2-oxoglutarate 5-dioxygenase 3 OS=Mus musculus GN=Plod3 PE=1 SV=1           | Q9R0E1           | Plod3        | 85 kDa  | 0            | 0           | 7.1579       | 4.0833      | 4.7269       | TRUE      |
| Profilin-2 OS=Mus musculus GN=Pfn2 PE=1 SV=3                                                   | Q9JJV2           | Pfn2         | 15 kDa  | 3.6831       | 0           | 5.3684       | 0.81665     | 0            | TRUE      |
| Prohibitin OS=Mus musculus GN=Phb PE=1 SV=1                                                    | P67778           | Phb          | 30 kDa  | 11.049       | 9.5872      | 10.737       | 3.6749      | 3.8675       | TRUE      |
| Prohibitin-2 OS=Mus musculus GN=Phb2 PE=1 SV=1                                                 | O35129 (+1)      | Phb2         | 33 kDa  | 12.891       | 15.979      | 17.895       | 4.4916      | 5.5863       | TRUE      |
| Prolyl 4-hydroxylase subunit alpha-1 OS=Mus musculus GN=P4ha1 PE=1 SV=2                        | Q60715           | P4ha1        | 61 kDa  | 5.5246       | 14.381      | 12.526       | 9.3915      | 9.8835       | TRUE      |
| Propionyl-CoA carboxylase beta chain, mitochondrial OS=Mus musculus GN=Pccb PE=1 SV=2          | Q99MN9           | Pccb         | 58 kDa  | 18.415       | 19.174      | 21.474       | 0           | 0            | TRUE      |
| Propionyl-Coenzyme A carboxylase, alpha polypeptide, isoform CRA_b OS=Mus musculus GN=Pcca     | Q3UGC8 (+1)      | Pcca         | 80 kDa  | 66.296       | 52.729      | 51.895       | 1.225       | 2.1486       | TRUE      |
| Prostacyclin synthase OS=Mus musculus GN=Ptgis PE=1 SV=1                                       | O35074           | Ptgis        | 57 kDa  | 0            | 7.9893      | 5.3684       | 6.9416      | 4.7269       | TRUE      |
| Prostaglandin F2 receptor negative regulator OS=Mus musculus GN=Ptgfrn PE=1 SV=2               | Q9WV91           | Ptgfrn       | 99 kDa  | 16.574       | 15.979      | 10.737       | 0           | 0.85944      | TRUE      |
| Proteasome (Prosome, macropain) 26S subunit, non-ATPase, 13 OS=Mus musculus GN=Psm13 PE=1 SV=1 | B2RT97 (+1)      | Psm13        | 43 kDa  | 5.5246       | 6.3914      | 5.3684       | 5.3082      | 6.4458       | TRUE      |
| Proteasome activator complex subunit 1 (Fragment) OS=Mus musculus GN=Psme1 PE=1 SV=1           | G3UXZ5 (+2)      | Psme1        | 27 kDa  | 0            | 3.1957      | 5.3684       | 3.2666      | 0            | TRUE      |
| Proteasome subunit alpha type (Fragment) OS=Mus musculus GN=Psma4 PE=2 SV=1                    | Q3TL95 (+1)      | Psma4        | 28 kDa  | 5.5246       | 4.7936      | 8.9474       | 3.6749      | 3.4377       | TRUE      |
| Proteasome subunit alpha type OS=Mus musculus GN=Psma1 PE=1 SV=1                               | Q3TS44 (+1)      | Psma1        | 30 kDa  | 3.6831       | 6.3914      | 5.3684       | 4.0833      | 5.1566       | TRUE      |
| Proteasome subunit alpha type OS=Mus musculus GN=Psma3 PE=2 SV=1                               | Q9DCD8           | Psma3        | 28 kDa  | 5.5246       | 4.7936      | 3.5789       | 2.0416      | 2.5783       | TRUE      |
| Proteasome subunit alpha type OS=Mus musculus GN=Psma7 PE=2 SV=1                               | Q3TN31 (+2)      | Psma7        | 28 kDa  | 11.049       | 9.5872      | 7.1579       | 4.8999      | 5.1566       | TRUE      |
| Proteasome subunit alpha type-6 OS=Mus musculus GN=Psma6 PE=1 SV=1                             | Q9QUJ9           | Psma6        | 27 kDa  | 3.6831       | 6.3914      | 5.3684       | 4.0833      | 4.7269       | TRUE      |
| Proteasome subunit beta type-2 OS=Mus musculus GN=Psmb2 PE=1 SV=1                              | Q9R1P3           | Psmb2        | 23 kDa  | 0            | 4.7936      | 0            | 2.0416      | 1.7189       | TRUE      |
| Proteasome subunit beta type-4 OS=Mus musculus GN=Psmb4 PE=1 SV=1                              | P99026           | Psmb4        | 29 kDa  | 0            | 0           | 5.3684       | 2.8583      | 4.2972       | TRUE      |
| Proteasome subunit beta type-5 OS=Mus musculus GN=Psmb5 PE=1 SV=3                              | O55234           | Psmb5        | 29 kDa  | 0            | 9.5872      | 5.3684       | 2.8583      | 6.4458       | TRUE      |
| Proteasome subunit beta type-6 OS=Mus musculus GN=Psmb6 PE=1 SV=3                              | Q60692           | Psmb6        | 25 kDa  | 3.6831       | 3.1957      | 3.5789       | 2.0416      | 1.7189       | TRUE      |
| Proteasome subunit beta type-7 OS=Mus musculus GN=Psmb7 PE=1 SV=1                              | P70195 (+1)      | Psmb7        | 30 kDa  | 0            | 4.7936      | 0            | 4.0833      | 3.8675       | TRUE      |
| Protein argonaute-2 OS=Mus musculus GN=Ago2 PE=1 SV=3                                          | Q8CJG0           | Ago2         | 97 kDa  | 11.049       | 12.783      | 10.737       | 3.2666      | 3.8675       | TRUE      |
| Protein CIP2A OS=Mus musculus GN=Kiaa1524 PE=1 SV=3                                            | Q8BWW9           | Kiaa1524     | 102 kDa | 0            | 0           | 7.1579       | 0           | 0            | TRUE      |
| Protein CYR61 OS=Mus musculus GN=Cyr61 PE=1 SV=1                                               | P18406 (+1)      | Cyr61        | 42 kDa  | 31.306       | 9.5872      | 12.526       | 2.8583      | 2.1486       | TRUE      |

| Identified Proteins (2666)                                                                     | Accession Number | Alternate ID | MW      | VPSko-biotin | ctrl-biotin | VPSoe-biotin | ctrl lysate | VPSoe lysate | enriched? |
|------------------------------------------------------------------------------------------------|------------------|--------------|---------|--------------|-------------|--------------|-------------|--------------|-----------|
| Protein diaphanous homolog 1 OS=Mus musculus GN=Diaph1 PE=1 SV=1                               | E9PV41 (+1)      | Diaph1       | 140 kDa | 12.891       | 11.185      | 5.3684       | 0           | 0            | TRUE      |
| Protein disulfide-isomerase A3 OS=Mus musculus GN=Pdia3 PE=1 SV=2                              | P27773           | Pdia3        | 57 kDa  | 29.465       | 39.947      | 37.579       | 28.991      | 24.924       | TRUE      |
| Protein disulfide-isomerase OS=Mus musculus GN=P4hb PE=2 SV=1                                  | Q3UBY9           | P4hb         | 57 kDa  | 27.623       | 33.555      | 41.158       | 22.458      | 20.197       | TRUE      |
| Protein FAM171A2 OS=Mus musculus GN=Fam171a2 PE=1 SV=1                                         | A2A699           | Fam171a2     | 87 kDa  | 0            | 6.3914      | 8.9474       | 0           | 0            | TRUE      |
| Protein FAM234A OS=Mus musculus GN=Fam234a PE=1 SV=1                                           | Q8COZ1           | Fam234a      | 61 kDa  | 0            | 7.9893      | 5.3684       | 0           | 0            | TRUE      |
| Protein FAM83H OS=Mus musculus GN=Fam83h PE=1 SV=1                                             | Q148V8           | Fam83h       | 131 kDa | 12.891       | 0           | 14.316       | 0           | 0            | TRUE      |
| Protein FAM98A OS=Mus musculus GN=Fam98a PE=1 SV=1                                             | Q3TJZ6           | Fam98a       | 55 kDa  | 0            | 3.1957      | 0            | 1.6333      | 1.2892       | TRUE      |
| Protein furry homolog OS=Mus musculus GN=Fry PE=1 SV=1                                         | E9Q8I9           | Fry          | 339 kDa | 3.6831       | 0           | 3.5789       | 0           | 0            | TRUE      |
| Protein lin-7 homolog C OS=Mus musculus GN=Lin7c PE=1 SV=2                                     | O88952 (+2)      | Lin7c        | 22 kDa  | 0            | 3.1957      | 0            | 0           | 0.85944      | TRUE      |
| Protein misato homolog 1 OS=Mus musculus GN=Msto1 PE=1 SV=1                                    | Q2YDW2           | Msto1        | 61 kDa  | 0            | 0           | 3.5789       | 2.45        | 1.2892       | TRUE      |
| Protein MON2 homolog OS=Mus musculus GN=Mon2 PE=1 SV=2                                         | Q8OTL7           | Mon2         | 189 kDa | 0            | 3.1957      | 0            | 2.0416      | 0            | TRUE      |
| Protein PRRC2B OS=Mus musculus GN=Prrc2b PE=1 SV=1                                             | F8WHT3           | Prrc2b       | 243 kDa | 18.415       | 7.9893      | 3.5789       | 1.225       | 0.85944      | TRUE      |
| Protein PRRC2C OS=Mus musculus GN=Prrc2c PE=1 SV=1                                             | A0A0A0MQ79 (+2)  | Prrc2c       | 311 kDa | 5.5246       | 6.3914      | 0            | 3.6749      | 3.008        | TRUE      |
| Protein quaking OS=Mus musculus GN=Qki PE=1 SV=1                                               | Q9QYS9           | Qki          | 38 kDa  | 3.6831       | 0           | 0            | 0           | 0            | TRUE      |
| Protein RCC2 OS=Mus musculus GN=Rcc2 PE=1 SV=1                                                 | Q8BK67           | Rcc2         | 56 kDa  | 9.2077       | 7.9893      | 14.316       | 8.1665      | 10.313       | TRUE      |
| Protein S100-A14 OS=Mus musculus GN=S100a14 PE=1 SV=1                                          | Q9D2Q8           | S100a14      | 12 kDa  | 3.6831       | 3.1957      | 3.5789       | 0           | 0            | TRUE      |
| Protein S100-A6 OS=Mus musculus GN=S100a6 PE=1 SV=3                                            | P14069 (+1)      | S100a6       | 10 kDa  | 0            | 0           | 3.5789       | 0           | 0            | TRUE      |
| Protein SMG7 OS=Mus musculus GN=Smg7 PE=2 SV=1                                                 | Q5RJH6           | Smg7         | 127 kDa | 3.6831       | 7.9893      | 5.3684       | 0           | 0            | TRUE      |
| Protein transport protein sec16 OS=Mus musculus GN=Sec16a PE=1 SV=1                            | A2AIX1 (+1)      | Sec16a       | 256 kDa | 7.3662       | 3.1957      | 7.1579       | 2.0416      | 0.85944      | TRUE      |
| Protein transport protein Sec61 subunit alpha isoform 1 OS=Mus musculus GN=Sec61a1 PE=1 SV=1   | P61620 (+1)      | Sec61a1      | 52 kDa  | 3.6831       | 4.7936      | 7.1579       | 3.2666      | 3.4377       | TRUE      |
| Protein transport protein Sec61 subunit beta OS=Mus musculus GN=Sec61b PE=1 SV=3               | Q9CQ58           | Sec61b       | 10 kDa  | 3.6831       | 3.1957      | 3.5789       | 1.225       | 1.2892       | TRUE      |
| Protein-glutamine gamma-glutamyltransferase K OS=Mus musculus GN=Tgm1 PE=1 SV=1                | A0A0R4J293 (+1)  | Tgm1         | 90 kDa  | 0            | 4.7936      | 0            | 0           | 0            | TRUE      |
| Protein-lysine 6-oxidase OS=Mus musculus GN=Lox PE=1 SV=1                                      | P28301 (+3)      | Lox          | 47 kDa  | 7.3662       | 6.3914      | 8.9474       | 2.45        | 2.5783       | TRUE      |
| Protein/nucleic acid deglycase DJ-1 OS=Mus musculus GN=Park7 PE=1 SV=1                         | Q99LX0           | Park7        | 20 kDa  | 12.891       | 11.185      | 21.474       | 4.4916      | 2.5783       | TRUE      |
| Prothymosin alpha OS=Mus musculus GN=Ptma PE=1 SV=2                                            | P26350 (+5)      | Ptma         | 12 kDa  | 5.5246       | 4.7936      | 7.1579       | 5.3082      | 4.7269       | TRUE      |
| Protocadherin 7 OS=Mus musculus GN=Pcdh7 PE=1 SV=2                                             | E9Q2S0           | Pcdh7        | 136 kDa | 7.3662       | 9.5872      | 0            | 0           | 0            | TRUE      |
| Protocadherin Fat 4 OS=Mus musculus GN=Fat4 PE=1 SV=2                                          | Q2PZL6           | Fat4         | 540 kDa | 18.415       | 35.153      | 12.526       | 0           | 0            | TRUE      |
| Protocadherin gamma C3 OS=Mus musculus GN=Pcdhgc3 PE=1 SV=1                                    | Q91XX1           | Pcdhgc3      | 101 kDa | 7.3662       | 7.9893      | 0            | 0           | 0            | TRUE      |
| Pumilio homolog 2 OS=Mus musculus GN=Pum2 PE=1 SV=1                                            | Q3UR91           | Pum2         | 114 kDa | 9.2077       | 0           | 10.737       | 0           | 0            | TRUE      |
| Puromycin-sensitive aminopeptidase OS=Mus musculus GN=Npepps PE=1 SV=2                         | Q11011           | Npepps       | 103 kDa | 14.732       | 3.1957      | 0            | 4.8999      | 6.4458       | TRUE      |
| Putative envelope protein OS=Mus musculus GN=env PE=4 SV=1                                     | G4V4Z0           | env          | 70 kDa  | 31.306       | 28.762      | 25.053       | 2.0416      | 1.2892       | TRUE      |
| Pyruvate carboxylase OS=Mus musculus GN=Pcx PE=1 SV=1                                          | E9QPD7 (+3)      | Pcx          | 130 kDa | 27.623       | 36.751      | 37.579       | 0           | 0            | TRUE      |
| Pyruvate dehydrogenase E1 component subunit beta, mitochondrial OS=Mus musculus GN=Pdhb        | Q9D051           | Pdhb         | 39 kDa  | 3.6831       | 4.7936      | 8.9474       | 3.6749      | 5.5863       | TRUE      |
| Pyruvate dehydrogenase protein X component, mitochondrial OS=Mus musculus GN=Pdhx PE=1 SV=1    | Q8BKZ9           | Pdhx         | 54 kDa  | 0            | 3.1957      | 0            | 1.6333      | 0            | TRUE      |
| Ran GTPase-activating protein 1 OS=Mus musculus GN=Rangap1 PE=1 SV=2                           | P46061 (+2)      | Rangap1      | 64 kDa  | 3.6831       | 0           | 0            | 2.45        | 2.1486       | TRUE      |
| Ran-specific GTPase-activating protein OS=Mus musculus GN=Ranbp1 PE=1 SV=2                     | P34022           | Ranbp1       | 24 kDa  | 0            | 3.1957      | 3.5789       | 2.45        | 2.1486       | TRUE      |
| Ras-related protein Rab-11B OS=Mus musculus GN=Rab11b PE=1 SV=3                                | P46638 (+1)      | Rab11b       | 24 kDa  | 3.6831       | 0           | 0            | 2.45        | 3.008        | TRUE      |
| Ras-related protein Rab-2A OS=Mus musculus GN=Rab2a PE=1 SV=1                                  | P53994 (+1)      | Rab2a        | 24 kDa  | 0            | 4.7936      | 0            | 4.4916      | 6.0161       | TRUE      |
| Ras-related protein Rab-5C OS=Mus musculus GN=Rab5c PE=1 SV=2                                  | P35278 (+2)      | Rab5c        | 23 kDa  | 0            | 3.1957      | 0            | 1.225       | 1.7189       | TRUE      |
| Receptor of activated protein C kinase 1 OS=Mus musculus GN=Rack1 PE=1 SV=3                    | P68040           | Rack1        | 35 kDa  | 12.891       | 14.381      | 17.895       | 9.7998      | 13.321       | TRUE      |
| Receptor tyrosine-protein kinase erbB-2 OS=Mus musculus GN=ErbB2 PE=1 SV=3                     | P70424           | ErbB2        | 139 kDa | 3.6831       | 4.7936      | 5.3684       | 0           | 0            | TRUE      |
| Receptor-interacting serine/threonine-protein kinase 1 OS=Mus musculus GN=Ripk1 PE=1 SV=1      | Q60855           | Ripk1        | 75 kDa  | 0            | 3.1957      | 5.3684       | 1.6333      | 1.7189       | TRUE      |
| Receptor-type tyrosine-protein phosphatase kappa OS=Mus musculus GN=Ptpkr PE=1 SV=1            | A0A1W2P7Y1 (+1)  | Ptpkr        | 166 kDa | 14.732       | 44.74       | 30.421       | 3.2666      | 3.4377       | TRUE      |
| Receptor-type tyrosine-protein phosphatase mu OS=Mus musculus GN=Ptpm PE=1 SV=2                | P28828 (+1)      | Ptpm         | 164 kDa | 5.5246       | 12.783      | 5.3684       | 0           | 0            | TRUE      |
| Receptor-type tyrosine-protein phosphatase S OS=Mus musculus GN=Ptpsr PE=1 SV=1                | B0V2N1           | Ptpsr        | 212 kDa | 9.2077       | 3.1957      | 12.526       | 0           | 1.2892       | TRUE      |
| Recombining binding protein suppressor of hairless (Drosophila), isoform CRA_b OS=Mus musculus | A0A0J9YTV5 (+4)  | Rbpj         | 57 kDa  | 3.6831       | 3.1957      | 5.3684       | 3.2666      | 3.4377       | TRUE      |
| Replication protein A subunit OS=Mus musculus GN=Rpa1 PE=2 SV=1                                | Q3U8B3 (+2)      | Rpa1         | 71 kDa  | 0            | 0           | 5.3684       | 3.6749      | 5.5863       | TRUE      |
| Reticulocalbin-1 OS=Mus musculus GN=Rcn1 PE=1 SV=1                                             | Q05186           | Rcn1         | 38 kDa  | 3.6831       | 9.5872      | 3.5789       | 3.2666      | 1.7189       | TRUE      |
| Reticulocalbin-3 OS=Mus musculus GN=Rcn3 PE=1 SV=1                                             | Q8BH97           | Rcn3         | 38 kDa  | 5.5246       | 12.783      | 7.1579       | 3.2666      | 3.4377       | TRUE      |
| Retinol dehydrogenase 13 OS=Mus musculus GN=Rdh13 PE=1 SV=1                                    | Q8CEE7           | Rdh13        | 36 kDa  | 0            | 4.7936      | 0            | 0           | 0            | TRUE      |
| Rho guanine nucleotide exchange factor 2 OS=Mus musculus GN=Arhgef2 PE=1 SV=1                  | H3BJ40 (+2)      | Arhgef2      | 110 kDa | 0            | 0           | 5.3684       | 5.3082      | 4.2972       | TRUE      |



| Identified Proteins (2666)                                                                          | Accession Number | Alternate ID | MW      | VPSko-biotin | ctrl-biotin | VPSoe-biotin | ctrl lysate | VPSoe lysate | enriched? |
|-----------------------------------------------------------------------------------------------------|------------------|--------------|---------|--------------|-------------|--------------|-------------|--------------|-----------|
| Ribosomal protein 10 OS=Mus musculus GN=RP23-436K3.4-001 PE=4 SV=1                                  | A2AM97 (+1)      | RP23-436K3   | 25 kDa  | 7.3662       | 4.7936      | 5.3684       | 8.1665      | 7.3052       | TRUE      |
| Ribosomal protein L23A, pseudogene 3 OS=Mus musculus GN=Rpl23a-ps3 PE=3 SV=1                        | A0A140T8M7 (+4)  | Rpl23a-ps3   | 18 kDa  | 3.6831       | 0           | 3.5789       | 1.6333      | 2.1486       | TRUE      |
| Ribosomal protein OS=Mus musculus GN=Rpl10a PE=2 SV=1                                               | Q3U561 (+1)      | Rpl10a       | 25 kDa  | 11.049       | 11.185      | 7.1579       | 2.8583      | 2.1486       | TRUE      |
| Ribosomal protein S14 OS=Mus musculus GN=rps14 PE=3 SV=1                                            | O70569 (+1)      | rps14        | 16 kDa  | 9.2077       | 7.9893      | 10.737       | 6.5332      | 7.7349       | TRUE      |
| Ribosome-binding protein 1 OS=Mus musculus GN=Rrbp1 PE=1 SV=1                                       | A2AV17 (+1)      | Rrbp1        | 158 kDa | 7.3662       | 11.185      | 12.526       | 9.7998      | 6.0161       | TRUE      |
| RIKEN cDNA 2610206B13, isoform CRA_b OS=Mus musculus GN=Rnf219 PE=1 SV=1                            | G3X8V5 (+1)      | Rnf219       | 80 kDa  | 5.5246       | 4.7936      | 5.3684       | 0           | 0            | TRUE      |
| RNA binding protein fox-1 homolog 2 OS=Mus musculus GN=Rbfox2 PE=1 SV=2                             | Q8BP71           | Rbfox2       | 47 kDa  | 7.3662       | 6.3914      | 8.9474       | 0           | 0            | TRUE      |
| RNA-binding protein 14 OS=Mus musculus GN=Rbm14 PE=1 SV=1                                           | Q8C2Q3           | Rbm14        | 69 kDa  | 0            | 3.1957      | 0            | 0           | 0            | TRUE      |
| RNA-binding protein 3 OS=Mus musculus GN=Rbm3 PE=1 SV=1                                             | O89086 (+1)      | Rbm3         | 17 kDa  | 3.6831       | 0           | 0            | 2.8583      | 5.5863       | TRUE      |
| Rpl11 protein OS=Mus musculus GN=Rpl11 PE=2 SV=1                                                    | Q8VC94 (+1)      | Rpl11        | 19 kDa  | 3.6831       | 6.3914      | 7.1579       | 2.45        | 2.5783       | TRUE      |
| Rps19 protein (Fragment) OS=Mus musculus GN=Rps19 PE=2 SV=1                                         | Q5M9P3 (+1)      | Rps19        | 17 kDa  | 9.2077       | 12.783      | 10.737       | 4.0833      | 3.8675       | TRUE      |
| S-adenosylhomocysteine hydrolase-like protein 1 OS=Mus musculus GN=Ahcy1 PE=1 SV=1                  | Q805W1           | Ahcy1        | 59 kDa  | 0            | 3.1957      | 7.1579       | 6.9416      | 7.3052       | TRUE      |
| S-methyl-5'-thioadenosine phosphorylase OS=Mus musculus GN=Mtap PE=1 SV=1                           | Q9CQ65           | Mtap         | 31 kDa  | 9.2077       | 7.9893      | 10.737       | 4.0833      | 3.4377       | TRUE      |
| Sarcoglycan, delta (Dystrophin-associated glycoprotein), isoform CRA_b OS=Mus musculus GN=Sgcd      | Q8C8D9           | Sgcd         | 18 kDa  | 0            | 3.1957      | 3.5789       | 0           | 0            | TRUE      |
| Sarcoplasmic/endoplasmic reticulum calcium ATPase 2 OS=Mus musculus GN=Atp2a2 PE=1 SV=2             | O55143 (+1)      | Atp2a2       | 115 kDa | 7.3662       | 11.185      | 5.3684       | 11.841      | 9.8835       | TRUE      |
| Scr3 OS=Mus musculus GN=Rbms2 PE=2 SV=1                                                             | Q9WTS9           | Rbms2        | 38 kDa  | 0            | 3.1957      | 0            | 0.81665     | 1.2892       | TRUE      |
| Semaphorin-3A OS=Mus musculus GN=Sema3a PE=1 SV=2                                                   | O08665           | Sema3a       | 89 kDa  | 16.574       | 11.185      | 3.5789       | 0           | 0            | TRUE      |
| Semaphorin-3C OS=Mus musculus GN=Sema3c PE=1 SV=2                                                   | Q62181           | Sema3c       | 85 kDa  | 12.891       | 6.3914      | 0            | 0           | 0            | TRUE      |
| Septin-11 OS=Mus musculus GN=Sept11 PE=1 SV=1                                                       | A0A0J9TY0 (+2)   | Sept11       | 49 kDa  | 5.5246       | 17.576      | 14.316       | 7.3499      | 7.7349       | TRUE      |
| Septin-2 OS=Mus musculus GN=Sept2 PE=1 SV=2                                                         | P42208           | Sept2        | 42 kDa  | 0            | 6.3914      | 5.3684       | 4.8999      | 4.7269       | TRUE      |
| Serine (or cysteine) peptidase inhibitor, clade B, member 6a OS=Mus musculus GN=Serpinb6a PE=1 SV=1 | F8WIV2 (+3)      | Serpinb6a    | 45 kDa  | 25.782       | 22.37       | 26.842       | 9.7998      | 9.8835       | TRUE      |
| Serine hydroxymethyltransferase OS=Mus musculus GN=Shmt2 PE=1 SV=1                                  | Q9CZN7           | Shmt2        | 56 kDa  | 11.049       | 17.576      | 23.263       | 10.208      | 12.462       | TRUE      |
| Serine/threonine kinase receptor associated protein OS=Mus musculus GN=Strap PE=1 SV=1              | B2RUC7 (+1)      | Strap        | 38 kDa  | 5.5246       | 6.3914      | 8.9474       | 4.8999      | 6.0161       | TRUE      |
| Serine/threonine-protein kinase Nek6 OS=Mus musculus GN=Nek6 PE=1 SV=1                              | Q9ES70           | Nek6         | 36 kDa  | 7.3662       | 6.3914      | 5.3684       | 1.6333      | 1.2892       | TRUE      |
| Serine/threonine-protein kinase SIK3 OS=Mus musculus GN=Sik3 PE=1 SV=1                              | E9PU87           | Sik3         | 151 kDa | 12.891       | 6.3914      | 12.526       | 0           | 0            | TRUE      |
| Serine/threonine-protein phosphatase 2A 56 kDa regulatory subunit OS=Mus musculus GN=Ppp2r5d        | Q99PC9           | Ppp2r5d      | 69 kDa  | 0            | 0           | 3.5789       | 2.0416      | 1.2892       | TRUE      |
| Serum albumin OS=Mus musculus GN=Alb PE=1 SV=3                                                      | P07724 (+1)      | Alb          | 69 kDa  | 3.6831       | 4.7936      | 5.3684       | 0           | 0.85944      | TRUE      |
| SH3 and PX domains 2B OS=Mus musculus GN=Sh3pxd2b PE=2 SV=1                                         | B9EJ37           | Sh3pxd2b     | 102 kDa | 0            | 0           | 3.5789       | 1.6333      | 2.1486       | TRUE      |
| SH3 domain-binding protein 4 OS=Mus musculus GN=Sh3bp4 PE=1 SV=1                                    | Q921I6           | Sh3bp4       | 108 kDa | 0            | 0           | 3.5789       | 0           | 0            | TRUE      |
| SHC-transforming protein 1 OS=Mus musculus GN=Shc1 PE=1 SV=3                                        | P98083           | Shc1         | 63 kDa  | 0            | 3.1957      | 0            | 2.8583      | 2.5783       | TRUE      |
| Sideroflexin-1 OS=Mus musculus GN=Sfxn1 PE=1 SV=3                                                   | Q99JR1           | Sfxn1        | 36 kDa  | 5.5246       | 0           | 5.3684       | 1.6333      | 3.008        | TRUE      |
| Sideroflexin-3 OS=Mus musculus GN=Sfxn3 PE=1 SV=1                                                   | Q91V61           | Sfxn3        | 35 kDa  | 5.5246       | 6.3914      | 8.9474       | 1.225       | 1.7189       | TRUE      |
| Signal peptidase complex subunit 2 OS=Mus musculus GN=Spes2 PE=1 SV=1                               | A0A140LHG8 (+2)  | Spes2        | 28 kDa  | 0            | 3.1957      | 3.5789       | 2.0416      | 0.85944      | TRUE      |
| Signal transducer and activator of transcription OS=Mus musculus GN=Stat1 PE=1 SV=1                 | A0A087WSP5 (+3)  | Stat1        | 88 kDa  | 0            | 3.1957      | 0            | 7.3499      | 0            | TRUE      |
| Signal-induced proliferation-associated 1-like protein 2 OS=Mus musculus GN=Sipa1l2 PE=1 SV=1       | A0A1D5RLY9 (+2)  | Sipa1l2      | 187 kDa | 5.5246       | 0           | 0            | 0           | 0            | TRUE      |
| Smooth muscle LIM protein OS=Mus musculus GN=Csrp2 PE=2 SV=1                                        | Q71V27           | Csrp2        | 21 kDa  | 0            | 3.1957      | 3.5789       | 4.0833      | 3.4377       | TRUE      |
| Sodium channel beta2 subunit OS=Mus musculus GN=Scn2b PE=1 SV=1                                     | Q1MXF8 (+1)      | Scn2b        | 24 kDa  | 3.6831       | 0           | 0            | 0           | 0            | TRUE      |
| Sodium-coupled neutral amino acid transporter 4 OS=Mus musculus GN=Slc38a4 PE=1 SV=1                | Q8R1S9           | Slc38a4      | 60 kDa  | 3.6831       | 0           | 0            | 0           | 0            | TRUE      |
| Sodium/potassium-transporting ATPase subunit alpha-1 OS=Mus musculus GN=Atp1a1 PE=1 SV=1            | Q8VDN2           | Atp1a1       | 113 kDa | 66.296       | 63.914      | 53.684       | 9.7998      | 9.8835       | TRUE      |
| Sodium/potassium-transporting ATPase subunit beta-3 OS=Mus musculus GN=Atp1b3 PE=1 SV=1             | P97370 (+1)      | Atp1b3       | 32 kDa  | 12.891       | 9.5872      | 7.1579       | 1.6333      | 2.5783       | TRUE      |
| Sorting nexin OS=Mus musculus GN=Snx9 PE=2 SV=1                                                     | Q3U1P2 (+1)      | Snx9         | 67 kDa  | 0            | 0           | 3.5789       | 2.8583      | 3.8675       | TRUE      |
| Spermatogenesis-associated protein 5 OS=Mus musculus GN=Spata5 PE=1 SV=1                            | A0A0G2JFY0 (+2)  | Spata5       | 91 kDa  | 7.3662       | 6.3914      | 10.737       | 0.81665     | 0            | TRUE      |
| Spermatogenesis-associated serine-rich protein 2 OS=Mus musculus GN=Spats2 PE=1 SV=1                | Q8K1N4           | Spats2       | 59 kDa  | 3.6831       | 3.1957      | 0            | 1.6333      | 2.5783       | TRUE      |
| Splicing factor, proline- and glutamine-rich OS=Mus musculus GN=Sfpq PE=1 SV=1                      | Q8VIJ6           | Sfpq         | 75 kDa  | 5.5246       | 4.7936      | 8.9474       | 3.2666      | 2.1486       | TRUE      |
| Sterol O-acyltransferase 1 OS=Mus musculus GN=Soat1 PE=1 SV=2                                       | Q61263           | Soat1        | 64 kDa  | 0            | 0           | 3.5789       | 2.0416      | 1.2892       | TRUE      |
| Stress-70 protein, mitochondrial OS=Mus musculus GN=Hspa9 PE=1 SV=3                                 | P38647           | Hspa9        | 73 kDa  | 20.257       | 19.174      | 21.474       | 20.416      | 19.767       | TRUE      |
| Stress-induced-phosphoprotein 1 OS=Mus musculus GN=Stip1 PE=1 SV=1                                  | Q60864           | Stip1        | 63 kDa  | 7.3662       | 11.185      | 12.526       | 15.108      | 12.462       | TRUE      |
| Succinyl-CoA:3-ketoacid coenzyme A transferase 1, mitochondrial OS=Mus musculus GN=Oxct1 PE=1 SV=1  | Q9D0K2           | Oxct1        | 56 kDa  | 0            | 0           | 5.3684       | 5.7166      | 4.7269       | TRUE      |
| Syndecan-associated protein 47 OS=Mus musculus GN=Snap47 PE=1 SV=1                                  | Q8R570           | Snap47       | 47 kDa  | 5.5246       | 9.5872      | 7.1579       | 0.81665     | 0            | TRUE      |
| Syndecan-1 OS=Mus musculus GN=Sdc1 PE=1 SV=1                                                        | P18828 (+1)      | Sdc1         | 33 kDa  | 3.6831       | 0           | 0            | 0.81665     | 0.85944      | TRUE      |
| T-complex protein 1 subunit alpha OS=Mus musculus GN=Tcp1 PE=1 SV=3                                 | P11983           | Tcp1         | 60 kDa  | 23.94        | 11.185      | 14.316       | 11.433      | 11.173       | TRUE      |

| Identified Proteins (2666)                                                                                                  | Accession Number | Alternate ID | MW      | VPSko-biotin | ctrl-biotin | VPSoe-biotin | ctrl lysate | VPSoe lysate | enriched? |
|-----------------------------------------------------------------------------------------------------------------------------|------------------|--------------|---------|--------------|-------------|--------------|-------------|--------------|-----------|
| T-complex protein 1 subunit beta OS=Mus musculus GN=Cct2 PE=1 SV=4                                                          | P80314 (+1)      | Cct2         | 57 kDa  | 11.049       | 11.185      | 12.526       | 8.5749      | 9.8835       | TRUE      |
| T-complex protein 1 subunit delta OS=Mus musculus GN=Cct4 PE=1 SV=3                                                         | P80315 (+2)      | Cct4         | 58 kDa  | 12.891       | 7.9893      | 16.105       | 11.841      | 15.47        | TRUE      |
| T-complex protein 1 subunit epsilon OS=Mus musculus GN=Cct5 PE=1 SV=1                                                       | P80316           | Cct5         | 60 kDa  | 16.574       | 19.174      | 17.895       | 13.475      | 12.462       | TRUE      |
| T-complex protein 1 subunit eta OS=Mus musculus GN=Cct7 PE=1 SV=1                                                           | P80313 (+3)      | Cct7         | 60 kDa  | 11.049       | 9.5872      | 7.1579       | 8.1665      | 10.743       | TRUE      |
| T-complex protein 1 subunit gamma OS=Mus musculus GN=Cct3 PE=1 SV=1                                                         | P80318 (+1)      | Cct3         | 61 kDa  | 16.574       | 17.576      | 17.895       | 11.841      | 14.61        | TRUE      |
| T-complex protein 1 subunit theta OS=Mus musculus GN=Cct8 PE=1 SV=3                                                         | P42932 (+2)      | Cct8         | 60 kDa  | 20.257       | 19.174      | 19.684       | 20.825      | 17.618       | TRUE      |
| T-complex protein 1 subunit zeta OS=Mus musculus GN=Cct6a PE=1 SV=3                                                         | P80317 (+2)      | Cct6a        | 58 kDa  | 18.415       | 12.783      | 17.895       | 8.5749      | 9.0241       | TRUE      |
| Tenascin OS=Mus musculus GN=Tnc PE=1 SV=1                                                                                   | Q80YX1           | Tnc          | 232 kDa | 14.732       | 11.185      | 12.526       | 0           | 0            | TRUE      |
| Thimet oligopeptidase OS=Mus musculus GN=Thop1 PE=1 SV=1                                                                    | A0A0R4IZY0 (+1)  | Thop1        | 78 kDa  | 0            | 3.1957      | 3.5789       | 4.8999      | 2.5783       | TRUE      |
| Thioredoxin domain-containing protein 12 OS=Mus musculus GN=Txndc12 PE=1 SV=1                                               | Q9CQU0           | Txndc12      | 19 kDa  | 11.049       | 9.5872      | 12.526       | 0           | 0            | TRUE      |
| Thioredoxin OS=Mus musculus GN=Txn PE=1 SV=3                                                                                | P10639           | Txn          | 12 kDa  | 5.5246       | 4.7936      | 7.1579       | 3.2666      | 6.8755       | TRUE      |
| Thioredoxin-dependent peroxide reductase, mitochondrial OS=Mus musculus GN=Prdx3 PE=1 SV=1                                  | P20108 (+1)      | Prdx3        | 28 kDa  | 0            | 0           | 3.5789       | 2.0416      | 2.1486       | TRUE      |
| Thrombospondin-1 OS=Mus musculus GN=Thbs1 PE=1 SV=1                                                                         | P35441 (+1)      | Thbs1        | 130 kDa | 12.891       | 23.968      | 8.9474       | 8.1665      | 6.0161       | TRUE      |
| Tissue factor OS=Mus musculus GN=F3 PE=1 SV=1                                                                               | A0A0R4J088 (+1)  | F3           | 33 kDa  | 0            | 4.7936      | 0            | 1.6333      | 0            | TRUE      |
| Toll-like receptor 2 OS=Mus musculus GN=Tlr2 PE=1 SV=1                                                                      | G3X8Y8 (+1)      | Tlr2         | 89 kDa  | 3.6831       | 11.185      | 3.5789       | 0           | 0            | TRUE      |
| Tpm2 protein OS=Mus musculus GN=Tpm2 PE=2 SV=1                                                                              | Q6PJ18           | Tpm2         | 33 kDa  | 0            | 17.576      | 0            | 4.8999      | 4.2972       | TRUE      |
| Tpm3 protein OS=Mus musculus GN=Tpm3 PE=2 SV=1                                                                              | Q58E70           | Tpm3         | 29 kDa  | 0            | 0           | 8.9474       | 6.9416      | 6.0161       | TRUE      |
| Transcription factor 12 (Fragment) OS=Mus musculus GN=Tcf12 PE=1 SV=1                                                       | V9GXC3           | Tcf12        | 55 kDa  | 7.3662       | 4.7936      | 0            | 0           | 0            | TRUE      |
| Transcriptional activator protein Pur-beta OS=Mus musculus GN=Purb PE=1 SV=3                                                | O35295           | Purb         | 34 kDa  | 0            | 0           | 3.5789       | 2.0416      | 2.5783       | TRUE      |
| Transferrin receptor, isoform CRA_a OS=Mus musculus GN=Tfrc PE=1 SV=1                                                       | Q542D9 (+1)      | Tfrc         | 86 kDa  | 29.465       | 22.37       | 25.053       | 2.45        | 4.2972       | TRUE      |
| Transforming growth factor beta receptor type 3 OS=Mus musculus GN=Tgfb3 PE=1 SV=1                                          | A0A0R4J097       | Tgfb3        | 94 kDa  | 11.049       | 17.576      | 12.526       | 0.81665     | 0            | TRUE      |
| Transgelin OS=Mus musculus GN=Tagln PE=1 SV=3                                                                               | P37804           | Tagln        | 23 kDa  | 0            | 11.185      | 3.5789       | 5.7166      | 3.4377       | TRUE      |
| Transgelin-2 OS=Mus musculus GN=Tagln2 PE=1 SV=4                                                                            | Q9WVA4           | Tagln2       | 22 kDa  | 16.574       | 6.3914      | 12.526       | 6.9416      | 7.3052       | TRUE      |
| Transitional endoplasmic reticulum ATPase OS=Mus musculus GN=Vcp PE=1 SV=4                                                  | Q01853           | Vcp          | 89 kDa  | 14.732       | 11.185      | 21.474       | 17.966      | 18.478       | TRUE      |
| Translationally-controlled tumor protein OS=Mus musculus GN=Tpt1 PE=1 SV=1                                                  | P63028           | Tpt1         | 19 kDa  | 0            | 0           | 7.1579       | 3.6749      | 6.0161       | TRUE      |
| Transmembrane protein 33 OS=Mus musculus GN=Tmem33 PE=1 SV=1                                                                | A0A0R4J1Z3 (+1)  | Tmem33       | 28 kDa  | 3.6831       | 4.7936      | 3.5789       | 1.225       | 0.85944      | TRUE      |
| Tricarboxylate transport protein, mitochondrial OS=Mus musculus GN=Slc25a1 PE=1 SV=1                                        | Q8JZU2           | Slc25a1      | 34 kDa  | 3.6831       | 0           | 5.3684       | 1.6333      | 0.85944      | TRUE      |
| Trifunctional enzyme subunit alpha, mitochondrial OS=Mus musculus GN=Hadha PE=1 SV=1                                        | Q8BMS1           | Hadha        | 83 kDa  | 11.049       | 12.783      | 14.316       | 2.8583      | 3.8675       | TRUE      |
| Trifunctional enzyme subunit beta, mitochondrial OS=Mus musculus GN=Hadhb PE=1 SV=1                                         | Q99JY0           | Hadhb        | 51 kDa  | 12.891       | 11.185      | 8.9474       | 1.225       | 2.5783       | TRUE      |
| Trinucleotide repeat-containing gene 6B protein OS=Mus musculus GN=Tnrc6b PE=1 SV=2                                         | Q8BK12           | Tnrc6b       | 192 kDa | 9.2077       | 3.1957      | 12.526       | 0           | 0            | TRUE      |
| Triosephosphate isomerase OS=Mus musculus GN=Tpi1 PE=1 SV=4                                                                 | P17751           | Tpi1         | 32 kDa  | 31.306       | 23.968      | 30.421       | 20.008      | 18.908       | TRUE      |
| tRNA-splicing ligase RtcB homolog OS=Mus musculus GN=Rtcb PE=2 SV=1                                                         | Q3TJ01 (+1)      | Rtcb         | 55 kDa  | 3.6831       | 11.185      | 7.1579       | 6.9416      | 4.2972       | TRUE      |
| Trophoblast glycoprotein OS=Mus musculus GN=Tpbg PE=1 SV=3                                                                  | Q9Z0L0           | Tpbg         | 46 kDa  | 3.6831       | 4.7936      | 3.5789       | 0           | 0.85944      | TRUE      |
| Tropomyosin 1, alpha OS=Mus musculus GN=Tpm1 PE=2 SV=1                                                                      | Q564G1           | Tpm1         | 33 kDa  | 5.5246       | 23.968      | 10.737       | 6.1249      | 5.1566       | TRUE      |
| Tropomyosin alpha-4 chain OS=Mus musculus GN=Tpm4 PE=1 SV=3                                                                 | Q6IRU2           | Tpm4         | 28 kDa  | 11.049       | 11.185      | 10.737       | 3.2666      | 4.2972       | TRUE      |
| Try10-like trypsinogen OS=Mus musculus GN=Gm5409 PE=2 SV=1                                                                  | Q7M754           | Gm5409       | 27 kDa  | 9.2077       | 4.7936      | 5.3684       | 0           | 0            | TRUE      |
| Tubulin alpha chain (Fragment) OS=Mus musculus GN=Tuba4a PE=1 SV=1                                                          | A0A0A0MQA5 (+1)  | Tuba4a       | 53 kDa  | 64.454       | 0           | 0            | 37.158      | 36.956       | TRUE      |
| Tubulin alpha-1B chain OS=Mus musculus GN=Tuba1b PE=1 SV=2                                                                  | P05213           | Tuba1b       | 50 kDa  | 71.82        | 0           | 0            | 0           | 0            | TRUE      |
| Tubulin alpha-1C chain OS=Mus musculus GN=Tuba1c PE=1 SV=1                                                                  | P68373 (+1)      | Tuba1c       | 50 kDa  | 66.296       | 60.719      | 71.579       | 36.341      | 35.237       | TRUE      |
| Tubulin beta chain OS=Mus musculus GN=Tubb6 PE=1 SV=1                                                                       | Q3UMM1 (+1)      | Tubb6        | 50 kDa  | 73.662       | 51.132      | 57.263       | 23.275      | 22.345       | TRUE      |
| Tubulin beta-2A chain OS=Mus musculus GN=Tubb2a PE=1 SV=1                                                                   | Q7TMM9           | Tubb2a       | 50 kDa  | 97.602       | 70.306      | 94.842       | 37.158      | 39.964       | TRUE      |
| Tubulin beta-4B chain OS=Mus musculus GN=Tubb4b PE=1 SV=1                                                                   | P68372           | Tubb4b       | 50 kDa  | 101.29       | 71.904      | 107.37       | 38.791      | 43.831       | TRUE      |
| Tubulin beta-5 chain OS=Mus musculus GN=Tubb5 PE=1 SV=1                                                                     | P99024           | Tubb5        | 50 kDa  | 112.33       | 83.089      | 119.89       | 43.691      | 45.98        | TRUE      |
| Tyrosine 3-monooxygenase/tryptophan 5-monooxygenase activation protein, beta polypeptide OS=Mus musculus GN=Ywhab PE=1 SV=1 | A2A5N2 (+1)      | Ywhab        | 28 kDa  | 7.3662       | 7.9893      | 5.3684       | 4.4916      | 5.1566       | TRUE      |
| Tyrosine-protein kinase receptor OS=Mus musculus GN=Insr PE=2 SV=1                                                          | M4TKR7 (+1)      | Insr         | 157 kDa | 0            | 0           | 7.1579       | 0           | 0            | TRUE      |
| Tyrosine-protein kinase receptor UFO OS=Mus musculus GN=Axl PE=1 SV=2                                                       | Q00993 (+1)      | Axl          | 98 kDa  | 5.5246       | 7.9893      | 5.3684       | 1.225       | 0            | TRUE      |
| Tyrosine-protein kinase transmembrane receptor ROR2 OS=Mus musculus GN=Ror2 PE=1 SV=1                                       | E9PUN5 (+1)      | Ror2         | 104 kDa | 3.6831       | 7.9893      | 7.1579       | 0           | 0            | TRUE      |
| Ubiquitin carboxyl-terminal hydrolase 4 OS=Mus musculus GN=Usp4 PE=1 SV=1                                                   | A0A0A6YW28 (+3)  | Usp4         | 104 kDa | 5.5246       | 6.3914      | 14.316       | 3.6749      | 2.1486       | TRUE      |
| Ubiquitin-40S ribosomal protein S27a OS=Mus musculus GN=Rps27a PE=1 SV=2                                                    | P62983 (+1)      | Rps27a       | 18 kDa  | 22.099       | 20.772      | 10.737       | 12.658      | 14.61        | TRUE      |
| Ubiquitin-associated protein 2 OS=Mus musculus GN=Ubp2 PE=1 SV=1                                                            | A2AMY5 (+1)      | Ubp2         | 118 kDa | 11.049       | 12.783      | 8.9474       | 3.2666      | 3.8675       | TRUE      |
| Ubiquitin-associated protein 2-like OS=Mus musculus GN=Ubp2l PE=1 SV=1                                                      | Q80X50           | Ubp2l        | 117 kDa | 38.672       | 41.544      | 39.368       | 8.5749      | 6.8755       | TRUE      |

| Identified Proteins (2666)                                                    | Accession Number | Alternate ID  | MW      | VPSko-biotin | ctrl-biotin | VPSoe-biotin | ctrl lysate | VPSoe lysate | enriched? |
|-------------------------------------------------------------------------------|------------------|---------------|---------|--------------|-------------|--------------|-------------|--------------|-----------|
| Ubiquitin-like modifier-activating enzyme 6 OS=Mus musculus GN=Uba6 PE=1 SV=1 | Q8C7R4           | Uba6          | 118 kDa | 0            | 0           | 5.3684       | 5.7166      | 4.2972       | TRUE      |
| Ubiquitin-protein ligase E3C OS=Mus musculus GN=Ube3c PE=1 SV=2               | Q80U95           | Ube3c         | 124 kDa | 11.049       | 3.1957      | 5.3684       | 0.81665     | 0            | TRUE      |
| UDP-glucose 6-dehydrogenase OS=Mus musculus GN=Ugdh PE=1 SV=1                 | O70475 (+2)      | Ugdh          | 55 kDa  | 11.049       | 3.1957      | 8.9474       | 9.3915      | 9.0241       | TRUE      |
| Uncharacterized protein (Fragment) OS=Mus musculus GN=Anp32b PE=2 SV=1        | Q3UW32 (+1)      | Anp32b        | 28 kDa  | 3.6831       | 3.1957      | 0            | 3.2666      | 2.5783       | TRUE      |
| Uncharacterized protein (Fragment) OS=Mus musculus GN=Cbfb PE=2 SV=1          | Q3UYR3           | Cbfb          | 16 kDa  | 3.6831       | 0           | 0            | 0.81665     | 0            | TRUE      |
| Uncharacterized protein (Fragment) OS=Mus musculus GN=Farsb PE=2 SV=1         | Q3TG12 (+1)      | Farsb         | 66 kDa  | 7.3662       | 4.7936      | 3.5789       | 4.8999      | 2.5783       | TRUE      |
| Uncharacterized protein (Fragment) OS=Mus musculus GN=Slc25a11 PE=2 SV=1      | Q9CTC7           | Slc25a11      | 28 kDa  | 0            | 3.1957      | 0            | 2.0416      | 1.7189       | TRUE      |
| Uncharacterized protein OS=Mus musculus GN=2210010C04Rik PE=2 SV=1            | Q9D7Y7           | 2210010C04Rik | 26 kDa  | 9.2077       | 4.7936      | 8.9474       | 0           | 1.2892       | TRUE      |
| Uncharacterized protein OS=Mus musculus GN=Ahsa1 PE=2 SV=1                    | Q3TL79 (+1)      | Ahsa1         | 38 kDa  | 5.5246       | 0           | 0            | 2.8583      | 3.8675       | TRUE      |
| Uncharacterized protein OS=Mus musculus GN=Atp5o PE=2 SV=1                    | Q3TF25 (+1)      | Atp5o         | 23 kDa  | 3.6831       | 9.5872      | 7.1579       | 2.0416      | 2.1486       | TRUE      |
| Uncharacterized protein OS=Mus musculus GN=Csde1 PE=1 SV=1                    | Q3U156 (+1)      | Csde1         | 89 kDa  | 9.2077       | 4.7936      | 5.3684       | 8.5749      | 10.743       | TRUE      |
| Uncharacterized protein OS=Mus musculus GN=Dars PE=2 SV=1                     | Q3TF87 (+1)      | Dars          | 57 kDa  | 9.2077       | 11.185      | 5.3684       | 6.9416      | 4.7269       | TRUE      |
| Uncharacterized protein OS=Mus musculus GN=Dnaja2 PE=2 SV=1                   | Q3TFF0 (+1)      | Dnaja2        | 46 kDa  | 9.2077       | 7.9893      | 7.1579       | 5.3082      | 4.7269       | TRUE      |
| Uncharacterized protein OS=Mus musculus GN=Eif4enif1 PE=2 SV=1                | Q8BY82           | Eif4enif1     | 105 kDa | 0            | 6.3914      | 8.9474       | 0           | 0            | TRUE      |
| Uncharacterized protein OS=Mus musculus GN=Emilin1 PE=2 SV=1                  | Q3U254 (+1)      | Emilin1       | 108 kDa | 16.574       | 11.185      | 12.526       | 0           | 0            | TRUE      |
| Uncharacterized protein OS=Mus musculus GN=Emilin2 PE=2 SV=1                  | Q3TBC8 (+5)      | Emilin2       | 117 kDa | 7.3662       | 0           | 3.5789       | 0           | 0            | TRUE      |
| Uncharacterized protein OS=Mus musculus GN=G3bp2 PE=2 SV=1                    | Q3U931 (+1)      | G3bp2         | 51 kDa  | 0            | 3.1957      | 5.3684       | 2.0416      | 3.008        | TRUE      |
| Uncharacterized protein OS=Mus musculus GN=H2-K1 PE=2 SV=1                    | Q3TV19           | H2-K1         | 41 kDa  | 18.415       | 23.968      | 5.3684       | 4.4916      | 1.7189       | TRUE      |
| Uncharacterized protein OS=Mus musculus GN=Hars PE=2 SV=1                     | Q3UDH1           | Hars          | 57 kDa  | 5.5246       | 0           | 3.5789       | 5.7166      | 3.8675       | TRUE      |
| Uncharacterized protein OS=Mus musculus GN=Hnrnpa1 PE=2 SV=1                  | Q3TIK8           | Hnrnpa1       | 34 kDa  | 7.3662       | 6.3914      | 3.5789       | 3.2666      | 4.2972       | TRUE      |
| Uncharacterized protein OS=Mus musculus GN=Hnrnpm PE=2 SV=1                   | A0A156GWJ8 (+3)  | Hnrnpm        | 86 kDa  | 62.613       | 51.132      | 76.947       | 9.3915      | 10.313       | TRUE      |
| Uncharacterized protein OS=Mus musculus GN=Hnrnpu PE=2 SV=1                   | Q3TVV6 (+4)      | Hnrnpu        | 88 kDa  | 5.5246       | 0           | 5.3684       | 5.3082      | 6.0161       | TRUE      |
| Uncharacterized protein OS=Mus musculus GN=Hspa8 PE=2 SV=1                    | Q3UBA6           | Hspa8         | 71 kDa  | 104.97       | 63.914      | 93.053       | 35.524      | 36.096       | TRUE      |
| Uncharacterized protein OS=Mus musculus GN=Itga6 PE=2 SV=1                    | Q8CC06           | Itga6         | 120 kDa | 9.2077       | 11.185      | 19.684       | 0           | 3.008        | TRUE      |
| Uncharacterized protein OS=Mus musculus GN=Lrpap1 PE=2 SV=1                   | A0A156GW19 (+6)  | Lrpap1        | 44 kDa  | 0            | 7.9893      | 7.1579       | 0.81665     | 0.85944      | TRUE      |
| Uncharacterized protein OS=Mus musculus GN=Maged1 PE=2 SV=1                   | Q3UIL5 (+2)      | Maged1        | 86 kDa  | 9.2077       | 7.9893      | 12.526       | 1.6333      | 3.008        | TRUE      |
| Uncharacterized protein OS=Mus musculus GN=Mmp14 PE=2 SV=1                    | Q3U270           | Mmp14         | 66 kDa  | 9.2077       | 9.5872      | 10.737       | 0           | 0            | TRUE      |
| Uncharacterized protein OS=Mus musculus GN=Ncl PE=2 SV=1                      | Q8CD23           | Ncl           | 77 kDa  | 20.257       | 15.979      | 17.895       | 14.291      | 14.61        | TRUE      |
| Uncharacterized protein OS=Mus musculus GN=Ncoa2 PE=2 SV=1                    | Q8BN74           | Ncoa2         | 95 kDa  | 5.5246       | 0           | 0            | 0           | 0            | TRUE      |
| Uncharacterized protein OS=Mus musculus GN=Ndufs1 PE=2 SV=1                   | Q3TIU7 (+1)      | Ndufs1        | 80 kDa  | 0            | 6.3914      | 0            | 3.6749      | 2.5783       | TRUE      |
| Uncharacterized protein OS=Mus musculus GN=Nono PE=2 SV=1                     | Q3UM20 (+2)      | Nono          | 55 kDa  | 9.2077       | 7.9893      | 12.526       | 3.6749      | 6.4458       | TRUE      |
| Uncharacterized protein OS=Mus musculus GN=P4ha2 PE=2 SV=1                    | Q5SX74           | P4ha2         | 61 kDa  | 5.5246       | 11.185      | 12.526       | 7.7582      | 6.4458       | TRUE      |
| Uncharacterized protein OS=Mus musculus GN=Pdia6 PE=2 SV=1                    | Q3TJL8 (+1)      | Pdia6         | 49 kDa  | 22.099       | 15.979      | 25.053       | 8.5749      | 8.5944       | TRUE      |
| Uncharacterized protein OS=Mus musculus GN=Ppp1r13l PE=1 SV=1                 | Q3TCU2 (+1)      | Ppp1r13l      | 89 kDa  | 7.3662       | 6.3914      | 7.1579       | 0           | 0            | TRUE      |
| Uncharacterized protein OS=Mus musculus GN=Ppp2r1a PE=2 SV=1                  | Q8C2E1           | Ppp2r1a       | 65 kDa  | 9.2077       | 6.3914      | 8.9474       | 6.1249      | 7.7349       | TRUE      |
| Uncharacterized protein OS=Mus musculus GN=Prkar1a PE=2 SV=1                  | Q3TYK4 (+1)      | Prkar1a       | 57 kDa  | 5.5246       | 0           | 7.1579       | 3.2666      | 3.8675       | TRUE      |
| Uncharacterized protein OS=Mus musculus GN=Prmt1 PE=1 SV=1                    | Q3UIG8 (+4)      | Prmt1         | 41 kDa  | 11.049       | 7.9893      | 7.1579       | 6.5332      | 8.5944       | TRUE      |
| Uncharacterized protein OS=Mus musculus GN=Psm11 PE=2 SV=1                    | Q3UWW9 (+3)      | Psm11         | 47 kDa  | 0            | 0           | 5.3684       | 3.6749      | 4.2972       | TRUE      |
| Uncharacterized protein OS=Mus musculus GN=Pum1 PE=2 SV=1                     | Q3TQ21 (+1)      | Pum1          | 127 kDa | 14.732       | 17.576      | 17.895       | 1.6333      | 2.1486       | TRUE      |
| Uncharacterized protein OS=Mus musculus GN=Pvr PE=2 SV=1                      | Q8BVF6 (+2)      | Pvr           | 45 kDa  | 9.2077       | 4.7936      | 5.3684       | 0           | 0.85944      | TRUE      |
| Uncharacterized protein OS=Mus musculus GN=Rbm39 PE=2 SV=1                    | Q3U313 (+2)      | Rbm39         | 59 kDa  | 5.5246       | 4.7936      | 0            | 2.45        | 3.008        | TRUE      |
| Uncharacterized protein OS=Mus musculus GN=Rcn2 PE=2 SV=1                     | Q3TE95 (+1)      | Rcn2          | 41 kDa  | 5.5246       | 9.5872      | 12.526       | 1.225       | 1.2892       | TRUE      |
| Uncharacterized protein OS=Mus musculus GN=Rpl14 PE=2 SV=1                    | Q9CWK0           | Rpl14         | 26 kDa  | 3.6831       | 3.1957      | 0            | 2.8583      | 2.1486       | TRUE      |
| Uncharacterized protein OS=Mus musculus GN=Rpl24 PE=2 SV=1                    | Q3UW40 (+1)      | Rpl24         | 18 kDa  | 3.6831       | 3.1957      | 3.5789       | 4.0833      | 3.008        | TRUE      |
| Uncharacterized protein OS=Mus musculus GN=Serpinh1 PE=2 SV=1                 | Q3TWG9           | Serpinh1      | 47 kDa  | 60.771       | 63.914      | 62.632       | 18.375      | 16.329       | TRUE      |
| Uncharacterized protein OS=Mus musculus GN=Slc25a3 PE=2 SV=1                  | Q3THU8 (+1)      | Slc25a3       | 40 kDa  | 11.049       | 11.185      | 16.105       | 6.5332      | 6.4458       | TRUE      |
| Uncharacterized protein OS=Mus musculus GN=Slc7a5 PE=2 SV=1                   | Q3UQM7 (+1)      | Slc7a5        | 56 kDa  | 11.049       | 7.9893      | 7.1579       | 2.45        | 2.1486       | TRUE      |
| Uncharacterized protein OS=Mus musculus GN=Sqor PE=2 SV=1                     | Q3UDS4 (+1)      | Sqor          | 50 kDa  | 29.465       | 17.576      | 21.474       | 3.6749      | 5.1566       | TRUE      |
| Uncharacterized protein OS=Mus musculus GN=Steap1 PE=2 SV=1                   | Q3UNB9 (+2)      | Steap1        | 39 kDa  | 9.2077       | 6.3914      | 5.3684       | 0           | 0            | TRUE      |
| Uncharacterized protein OS=Mus musculus GN=Tpp2 PE=2 SV=1                     | Q3TW28           | Tpp2          | 138 kDa | 3.6831       | 11.185      | 5.3684       | 10.208      | 9.8835       | TRUE      |
| Uncharacterized protein OS=Mus musculus GN=Trap1 PE=2 SV=1                    | Q3UPJ8 (+2)      | Trap1         | 80 kDa  | 18.415       | 14.381      | 21.474       | 7.7582      | 9.0241       | TRUE      |

| Identified Proteins (2666)                                                                                        | Accession Number | Alternate ID | MW      | VPSko-biotin | ctrl-biotin | VPSoe-biotin | ctrl lysate | VPSoe lysate | enriched? |
|-------------------------------------------------------------------------------------------------------------------|------------------|--------------|---------|--------------|-------------|--------------|-------------|--------------|-----------|
| Uncharacterized protein OS=Mus musculus GN=Txndc5 PE=1 SV=1                                                       | Q3TEE8 (+1)      | Txndc5       | 46 kDa  | 18.415       | 17.576      | 19.684       | 6.1249      | 9.0241       | TRUE      |
| Uncharacterized protein OS=Mus musculus GN=Unc5b PE=2 SV=1                                                        | Q3TYW6 (+1)      | Unc5b        | 104 kDa | 0            | 17.576      | 10.737       | 0           | 0            | TRUE      |
| Uncharacterized protein OS=Mus musculus GN=Uqrc1 PE=2 SV=1                                                        | Q3TIC8 (+1)      | Uqrc1        | 53 kDa  | 0            | 4.7936      | 8.9474       | 6.5332      | 5.5863       | TRUE      |
| Uncharacterized protein OS=Mus musculus PE=2 SV=1                                                                 | Q8CBU3           |              | 38 kDa  | 5.5246       | 4.7936      | 0            | 2.0416      | 2.1486       | TRUE      |
| Uridine 5'-monophosphate synthase OS=Mus musculus GN=Umps PE=1 SV=3                                               | P13439 (+1)      | Umps         | 52 kDa  | 0            | 0           | 7.1579       | 2.8583      | 3.008        | TRUE      |
| V-cr1 sarcoma virus CT10 oncogene homolog (Avian)-like OS=Mus musculus GN=Crkl PE=1 SV=1                          | A2R558 (+1)      | Crkl         | 34 kDa  | 5.5246       | 4.7936      | 7.1579       | 0.81665     | 1.2892       | TRUE      |
| Vacuolar protein sorting-associated protein 33B OS=Mus musculus GN=Vps33b PE=1 SV=1                               | P59016           | Vps33b       | 71 kDa  | 0            | 0           | 3.5789       | 0           | 6.0161       | TRUE      |
| Vacuolar protein sorting-associated protein 35 OS=Mus musculus GN=Vps35 PE=2 SV=1                                 | Q3TJ43 (+2)      | Vps35        | 92 kDa  | 0            | 3.1957      | 0            | 4.0833      | 2.5783       | TRUE      |
| Valyl-tRNA synthetase 2, isoform CRA_b OS=Mus musculus GN=Vars PE=1 SV=1                                          | Q790I0 (+1)      | Vars         | 140 kDa | 14.732       | 11.185      | 10.737       | 14.291      | 12.892       | TRUE      |
| Vascular cell adhesion molecule 1 OS=Mus musculus GN=Vcam1 PE=2 SV=1                                              | Q8K0X1           | Vcam1        | 81 kDa  | 31.306       | 30.359      | 23.263       | 3.2666      | 1.2892       | TRUE      |
| Vasorin OS=Mus musculus GN=Vasn PE=2 SV=2                                                                         | Q9CZT5           | Vasn         | 72 kDa  | 11.049       | 12.783      | 8.9474       | 0           | 0            | TRUE      |
| Versican core protein OS=Mus musculus GN=Vcan PE=1 SV=1                                                           | E9PYH0           | Vcan         | 367 kDa | 12.891       | 11.185      | 10.737       | 1.6333      | 0.85944      | TRUE      |
| Very long-chain specific acyl-CoA dehydrogenase, mitochondrial OS=Mus musculus GN=Acadvl PE=1 SV=1                | P50544           | Acadvl       | 71 kDa  | 0            | 3.1957      | 0            | 2.8583      | 3.008        | TRUE      |
| Very-long-chain 3-oxoacyl-CoA reductase OS=Mus musculus GN=Hsd17b12 PE=1 SV=1                                     | O70503 (+1)      | Hsd17b12     | 35 kDa  | 5.5246       | 4.7936      | 3.5789       | 6.5332      | 5.1566       | TRUE      |
| Very-long-chain enoyl-CoA reductase OS=Mus musculus GN=Teqr PE=1 SV=1                                             | Q9CY27           | Teqr         | 36 kDa  | 9.2077       | 12.783      | 10.737       | 1.6333      | 3.8675       | TRUE      |
| Vesicle-associated membrane protein-associated protein A OS=Mus musculus GN=Vapa PE=1 SV=1                        | Q9WV55           | Vapa         | 28 kDa  | 9.2077       | 3.1957      | 5.3684       | 3.6749      | 3.8675       | TRUE      |
| Vimentin OS=Mus musculus GN=Vim PE=1 SV=3                                                                         | P20152 (+2)      | Vim          | 54 kDa  | 11.049       | 15.979      | 5.3684       | 2.8583      | 1.2892       | TRUE      |
| Vinculin OS=Mus musculus GN=Vcl PE=1 SV=4                                                                         | Q64727           | Vcl          | 117 kDa | 0            | 19.174      | 12.526       | 18.783      | 14.181       | TRUE      |
| Voltage-dependent anion-selective channel protein 2 OS=Mus musculus GN=Vdac2 PE=1 SV=2                            | Q60930           | Vdac2        | 32 kDa  | 5.5246       | 3.1957      | 7.1579       | 3.6749      | 6.4458       | TRUE      |
| WD repeat-containing protein 5 OS=Mus musculus GN=Wdr5 PE=1 SV=1                                                  | P61965 (+1)      | Wdr5         | 37 kDa  | 5.5246       | 4.7936      | 0            | 1.225       | 0            | TRUE      |
| X-ray repair cross-complementing protein 6 OS=Mus musculus GN=Xrcc6 PE=1 SV=1                                     | A0A0R4J187 (+1)  | Xrcc6        | 69 kDa  | 0            | 0           | 7.1579       | 1.225       | 1.7189       | TRUE      |
| Y-box-binding protein 3 OS=Mus musculus GN=Ybx3 PE=1 SV=2                                                         | Q9JKB3           | Ybx3         | 39 kDa  | 7.3662       | 6.3914      | 8.9474       | 6.9416      | 6.0161       | TRUE      |
| YTH domain family 1, isoform CRA_a OS=Mus musculus GN=Ythdf1 PE=1 SV=1                                            | A2AWN8 (+1)      | Ythdf1       | 64 kDa  | 9.2077       | 0           | 5.3684       | 2.0416      | 2.1486       | TRUE      |
| YTH domain-containing family protein 2 OS=Mus musculus GN=Ythdf2 PE=1 SV=1                                        | Q91YT7           | Ythdf2       | 62 kDa  | 11.049       | 0           | 0            | 2.45        | 3.008        | TRUE      |
| YTH domain-containing family protein 3 OS=Mus musculus GN=Ythdf3 PE=1 SV=2                                        | Q8BYK6           | Ythdf3       | 64 kDa  | 9.2077       | 0           | 3.5789       | 3.2666      | 3.008        | TRUE      |
| Zinc finger protein ZFPM2 OS=Mus musculus GN=Zfp2 PE=1 SV=2                                                       | Q8CCH7           | Zfp2         | 128 kDa | 5.5246       | 3.1957      | 7.1579       | 0           | 0            | TRUE      |
| Zinc transporter ZIP10 OS=Mus musculus GN=Slc39a10 PE=1 SV=1                                                      | Q6P5F6           | Slc39a10     | 94 kDa  | 9.2077       | 4.7936      | 7.1579       | 0           | 0            | TRUE      |
| Zyx protein OS=Mus musculus GN=Zyx PE=1 SV=1                                                                      | Q7TQE2           | Zyx          | 57 kDa  | 0            | 4.7936      | 3.5789       | 7.7582      | 4.7269       | TRUE      |
| [F-actin]-monooxygenase MICAL1 OS=Mus musculus GN=Mical1 PE=1 SV=1                                                | Q8VDP3           | Mical1       | 117 kDa | 0            | 0           | 0            | 2.0416      | 1.7189       | FALSE     |
| [Protein ADP-ribosylarginine] hydrolase OS=Mus musculus GN=Adprh PE=1 SV=1                                        | P54923 (+1)      | Adprh        | 40 kDa  | 0            | 0           | 0            | 1.225       | 0            | FALSE     |
| [Pyruvate dehydrogenase (acetyl-transferring)] kinase isozyme 1, mitochondrial OS=Mus musculus GN=Kif1b PE=1 SV=1 | Q8BFP9 (+1)      | Pdk1         | 49 kDa  | 0            | 0           | 0            | 0           | 1.7189       | FALSE     |
| 1-acyl-sn-glycerol-3-phosphate acyltransferase delta OS=Mus musculus GN=Agpat4 PE=1 SV=1                          | Q8K4X7           | Agpat4       | 44 kDa  | 0            | 0           | 0            | 0.81665     | 1.2892       | FALSE     |
| 1-acyl-sn-glycerol-3-phosphate acyltransferase OS=Mus musculus GN=Agpat1 PE=1 SV=1                                | A0A0R4J263 (+1)  | Agpat1       | 32 kDa  | 0            | 0           | 0            | 0           | 0.85944      | FALSE     |
| 1,2-dihydroxy-3-keto-5-methylthiopentene dioxygenase OS=Mus musculus GN=Adi1 PE=1 SV=1                            | Q99JT9           | Adi1         | 22 kDa  | 0            | 0           | 0            | 0           | 0.85944      | FALSE     |
| 1,4-alpha-glucan-branching enzyme OS=Mus musculus GN=Gbe1 PE=1 SV=1                                               | G3UW30 (+1)      | Gbe1         | 76 kDa  | 0            | 0           | 0            | 0           | 0.85944      | FALSE     |
| 116 kDa U5 small nuclear ribonucleoprotein component OS=Mus musculus GN=Eftud2 PE=1 SV=1                          | A2AH85 (+4)      | Eftud2       | 109 kDa | 0            | 0           | 0            | 1.225       | 2.5783       | FALSE     |
| 130kDa Protein 4.1B MEF cell isoform OS=Mus musculus GN=Epb41l3 PE=1 SV=1                                         | A7Y80            | Epb41l3      | 98 kDa  | 5.5246       | 3.1957      | 5.3684       | 11.433      | 12.892       | FALSE     |
| 14 kDa phosphohistidine phosphatase OS=Mus musculus GN=Phpt1 PE=1 SV=1                                            | Q9DAK9           | Phpt1        | 14 kDa  | 0            | 0           | 0            | 1.225       | 3.008        | FALSE     |
| 14-3-3 protein eta OS=Mus musculus GN=Ywhah PE=1 SV=2                                                             | P68510           | Ywhah        | 28 kDa  | 0            | 0           | 0            | 2.0416      | 2.5783       | FALSE     |
| 17beta-hydroxysteroid dehydrogenase type 10/short chain L-3-hydroxyacyl-CoA dehydrogenase                         | Q99N15           | Hsd17b10     | 27 kDa  | 3.6831       | 0           | 0            | 4.4916      | 3.8675       | FALSE     |
| 182 kDa tankyrase-1-binding protein OS=Mus musculus GN=TNKS1BP1 PE=1 SV=2                                         | P58871           | Tnks1bp1     | 182 kDa | 3.6831       | 3.1957      | 3.5789       | 10.208      | 10.743       | FALSE     |
| 2-amino-3-ketobutyrate coenzyme A ligase, mitochondrial OS=Mus musculus GN=Gcat PE=1 SV=1                         | O88986           | Gcat         | 45 kDa  | 0            | 0           | 0            | 0.81665     | 2.1486       | FALSE     |
| 2-aminoethanethiol dioxygenase OS=Mus musculus GN=Ado PE=1 SV=2                                                   | Q6PDY2           | Ado          | 28 kDa  | 0            | 0           | 0            | 0.81665     | 0            | FALSE     |
| 2-iminobutanoate/2-iminopropanoate deaminase OS=Mus musculus GN=Rida PE=1 SV=3                                    | P52760           | Rida         | 14 kDa  | 0            | 0           | 0            | 1.6333      | 0.85944      | FALSE     |
| 2'-5'-oligoadenylate synthase 1A OS=Mus musculus GN=Oas1a PE=1 SV=2                                               | P11928           | Oas1a        | 42 kDa  | 0            | 0           | 0            | 2.45        | 0            | FALSE     |
| 2'-deoxynucleoside 5'-phosphate N-hydrolase 1 OS=Mus musculus GN=Dnph1 PE=1 SV=2                                  | Q80VJ3           | Dnph1        | 19 kDa  | 0            | 0           | 0            | 0           | 1.2892       | FALSE     |
| 2',5'-phosphodiesterase 12 OS=Mus musculus GN=Pde12 PE=1 SV=2                                                     | Q3TIU4           | Pde12        | 68 kDa  | 0            | 0           | 0            | 1.225       | 0.85944      | FALSE     |
| 26S proteasome non-ATPase regulatory subunit 1 OS=Mus musculus GN=Psm1 PE=1 SV=1                                  | Q3TXS7           | Psm1         | 106 kDa | 0            | 0           | 0            | 5.3082      | 3.8675       | FALSE     |
| 26S proteasome non-ATPase regulatory subunit 12 OS=Mus musculus GN=Psm12 PE=1 SV=1                                | B1AT36 (+2)      | Psm12        | 51 kDa  | 0            | 0           | 0            | 2.45        | 3.008        | FALSE     |
| 26S proteasome non-ATPase regulatory subunit 14 OS=Mus musculus GN=Psm14 PE=1 SV=2                                | O35593 (+1)      | Psm14        | 35 kDa  | 0            | 0           | 0            | 1.6333      | 1.7189       | FALSE     |
| 26S proteasome non-ATPase regulatory subunit 3 OS=Mus musculus GN=Psm3 PE=1 SV=3                                  | P14685           | Psm3         | 61 kDa  | 0            | 0           | 0            | 6.1249      | 5.5863       | FALSE     |

| Identified Proteins (2666)                                                               | Accession Number | Alternate ID | MW      | VPSko-biotin | ctrl-biotin | VPSoe-biotin | ctrl lysate | VPSoe lysate | enriched? |
|------------------------------------------------------------------------------------------|------------------|--------------|---------|--------------|-------------|--------------|-------------|--------------|-----------|
| 26S proteasome non-ATPase regulatory subunit 4 OS=Mus musculus GN=Psm�4 PE=1 SV=1        | O35226 (+1)      | Psm�4        | 41 kDa  | 0            | 0           | 0            | 2.45        | 2.5783       | FALSE     |
| 26S proteasome non-ATPase regulatory subunit 6 OS=Mus musculus GN=Psm�6 PE=1 SV=1        | Q99J14           | Psm�6        | 46 kDa  | 0            | 0           | 0            | 3.2666      | 3.4377       | FALSE     |
| 26S proteasome non-ATPase regulatory subunit 8 OS=Mus musculus GN=Psm�8 PE=1 SV=2        | Q9CX56           | Psm�8        | 40 kDa  | 0            | 0           | 0            | 3.2666      | 3.8675       | FALSE     |
| 26S proteasome regulatory subunit 4 OS=Mus musculus GN=Psmc1 PE=1 SV=1                   | P62192 (+1)      | Psmc1        | 49 kDa  | 0            | 0           | 0            | 4.0833      | 3.8675       | FALSE     |
| 28S ribosomal protein S22, mitochondrial OS=Mus musculus GN=Mrps22 PE=1 SV=1             | Q9CXW2           | Mrps22       | 41 kDa  | 0            | 0           | 0            | 0.81665     | 1.2892       | FALSE     |
| 28S ribosomal protein S29, mitochondrial OS=Mus musculus GN=Dap3 PE=1 SV=1               | Q9ER88           | Dap3         | 45 kDa  | 0            | 0           | 0            | 1.225       | 1.2892       | FALSE     |
| 28S ribosomal protein S30, mitochondrial OS=Mus musculus GN=Mrps30 PE=1 SV=1             | Q9D0G0           | Mrps30       | 50 kDa  | 0            | 0           | 0            | 0.81665     | 0            | FALSE     |
| 28S ribosomal protein S34, mitochondrial OS=Mus musculus GN=Mrps34 PE=1 SV=1             | Q9JIK9           | Mrps34       | 26 kDa  | 0            | 0           | 0            | 0.81665     | 0.85944      | FALSE     |
| 3-alpha-hydroxysteroid dehydrogenase type 1 OS=Mus musculus GN=Akr1c14 PE=1 SV=1         | Q91WT7           | Akr1c14      | 37 kDa  | 0            | 0           | 0            | 1.225       | 0            | FALSE     |
| 3-beta-hydroxysteroid-Delta(8),Delta(7)-isomerase OS=Mus musculus GN=Ebp PE=1 SV=3       | P70245           | Ebp          | 26 kDa  | 0            | 0           | 0            | 0.81665     | 0            | FALSE     |
| 3-hydroxyisobutyrate dehydrogenase, mitochondrial OS=Mus musculus GN=Hibadh PE=1 SV=1    | Q99L13           | Hibadh       | 35 kDa  | 0            | 0           | 0            | 2.45        | 3.008        | FALSE     |
| 3-ketoacyl-CoA thiolase A, peroxisomal OS=Mus musculus GN=Acaa1a PE=1 SV=1               | Q921H8           | Acaa1a       | 44 kDa  | 0            | 0           | 0            | 5.3082      | 6.4458       | FALSE     |
| 3-ketoacyl-CoA thiolase, mitochondrial OS=Mus musculus GN=Acaa2 PE=1 SV=3                | Q8BWT1           | Acaa2        | 42 kDa  | 0            | 0           | 0            | 3.2666      | 3.8675       | FALSE     |
| 39S ribosomal protein L3, mitochondrial OS=Mus musculus GN=Mrpl3 PE=1 SV=1               | D3Z456 (+2)      | Mrpl3        | 34 kDa  | 0            | 0           | 0            | 0.81665     | 0            | FALSE     |
| 39S ribosomal protein L37, mitochondrial OS=Mus musculus GN=Mrpl37 PE=1 SV=1             | Q921S7           | Mrpl37       | 48 kDa  | 0            | 0           | 0            | 0.81665     | 0            | FALSE     |
| 40S ribosomal protein S10 OS=Mus musculus GN=Rps10 PE=1 SV=1                             | P63325 (+1)      | Rps10        | 19 kDa  | 0            | 0           | 0            | 1.6333      | 1.2892       | FALSE     |
| 40S ribosomal protein S15 OS=Mus musculus GN=Rps15 PE=1 SV=1                             | D3YTQ9 (+2)      | Rps15        | 14 kDa  | 0            | 0           | 0            | 1.6333      | 1.2892       | FALSE     |
| 40S ribosomal protein S2 OS=Mus musculus GN=Rps2 PE=1 SV=3                               | P25444 (+3)      | Rps2         | 31 kDa  | 3.6831       | 3.1957      | 3.5789       | 7.7582      | 7.7349       | FALSE     |
| 40S ribosomal protein S23 OS=Mus musculus GN=Rps23 PE=1 SV=3                             | P62267 (+3)      | Rps23        | 16 kDa  | 0            | 0           | 0            | 1.225       | 1.2892       | FALSE     |
| 40S ribosomal protein S24 OS=Mus musculus GN=Rps24 PE=1 SV=1                             | A0A286YEB7 (+7)  | Rps24        | 14 kDa  | 0            | 0           | 0            | 1.225       | 2.1486       | FALSE     |
| 40S ribosomal protein S26 OS=Mus musculus GN=Rps26 PE=1 SV=3                             | P62855 (+1)      | Rps26        | 13 kDa  | 0            | 0           | 0            | 0           | 1.2892       | FALSE     |
| 40S ribosomal protein S6 OS=Mus musculus GN=Rps6 PE=1 SV=1                               | P62754 (+2)      | Rps6         | 29 kDa  | 0            | 0           | 0            | 7.3499      | 6.4458       | FALSE     |
| 40S ribosomal protein S9 OS=Mus musculus GN=Rps9 PE=1 SV=3                               | Q6ZWN5           | Rps9         | 23 kDa  | 0            | 0           | 0            | 5.3082      | 5.5863       | FALSE     |
| 5'-3' exoribonuclease 1 OS=Mus musculus GN=Xrn1 PE=1 SV=1                                | A0A087WQN7 (+2)  | Xrn1         | 194 kDa | 0            | 0           | 0            | 1.225       | 0.85944      | FALSE     |
| 5'-AMP-activated protein kinase subunit gamma-1 OS=Mus musculus GN=Prkag1 PE=1 SV=2      | O54950 (+1)      | Prkag1       | 38 kDa  | 0            | 0           | 0            | 1.6333      | 2.1486       | FALSE     |
| 55 kDa erythrocyte membrane protein OS=Mus musculus GN=Mpp1 PE=1 SV=1                    | A2AN84 (+3)      | Mpp1         | 51 kDa  | 0            | 0           | 0            | 1.225       | 2.1486       | FALSE     |
| 6-phosphogluconate dehydrogenase, decarboxylating OS=Mus musculus GN=Pgd PE=2 SV=1       | Q91V28 (+1)      | Pgd          | 53 kDa  | 0            | 0           | 0            | 8.9832      | 9.0241       | FALSE     |
| 6-phosphogluconolactonase OS=Mus musculus GN=Pgl5 PE=1 SV=1                              | Q9CQ60           | Pgl5         | 27 kDa  | 0            | 0           | 0            | 1.225       | 1.2892       | FALSE     |
| 60 kDa SS-A/Ro ribonucleoprotein OS=Mus musculus GN=Trove2 PE=1 SV=1                     | O08848 (+3)      | Trove2       | 60 kDa  | 0            | 0           | 0            | 0.81665     | 0.85944      | FALSE     |
| 60S ribosomal export protein NMD3 OS=Mus musculus GN=Nmd3 PE=1 SV=1                      | Q99L48           | Nmd3         | 58 kDa  | 0            | 0           | 0            | 2.0416      | 1.7189       | FALSE     |
| 60S ribosomal protein L13 OS=Mus musculus GN=Rpl13 PE=1 SV=3                             | P47963           | Rpl13        | 24 kDa  | 0            | 0           | 0            | 2.45        | 3.4377       | FALSE     |
| 60S ribosomal protein L13a OS=Mus musculus GN=Rpl13a PE=1 SV=4                           | P19253 (+1)      | Rpl13a       | 23 kDa  | 0            | 0           | 0            | 2.0416      | 3.4377       | FALSE     |
| 60S ribosomal protein L18 OS=Mus musculus GN=Rpl18 PE=1 SV=3                             | P35980 (+2)      | Rpl18        | 22 kDa  | 0            | 0           | 0            | 5.7166      | 5.1566       | FALSE     |
| 60S ribosomal protein L18a OS=Mus musculus GN=Rpl18a PE=1 SV=1                           | A0A1D5RLW5 (+1)  | Rpl18a       | 17 kDa  | 0            | 0           | 0            | 4.0833      | 4.2972       | FALSE     |
| 60S ribosomal protein L27a OS=Mus musculus GN=Rpl27a PE=1 SV=5                           | P14115           | Rpl27a       | 17 kDa  | 0            | 0           | 0            | 2.8583      | 2.1486       | FALSE     |
| 60S ribosomal protein L29 OS=Mus musculus GN=Rpl29 PE=1 SV=2                             | P47915 (+1)      | Rpl29        | 18 kDa  | 0            | 0           | 0            | 0           | 1.7189       | FALSE     |
| 60S ribosomal protein L3 OS=Mus musculus GN=Rpl3 PE=1 SV=3                               | P27659 (+2)      | Rpl3         | 46 kDa  | 0            | 4.7936      | 3.5789       | 12.25       | 12.032       | FALSE     |
| 60S ribosomal protein L31 OS=Mus musculus GN=Rpl31 PE=1 SV=1                             | A0A0A6YX26 (+3)  | Rpl31        | 15 kDa  | 0            | 0           | 0            | 1.6333      | 1.7189       | FALSE     |
| 60S ribosomal protein L32 OS=Mus musculus GN=Rpl32 PE=1 SV=2                             | P62911 (+1)      | Rpl32        | 16 kDa  | 0            | 0           | 0            | 1.6333      | 3.008        | FALSE     |
| 60S ribosomal protein L35 OS=Mus musculus GN=Rpl35 PE=1 SV=1                             | Q6ZVW7           | Rpl35        | 15 kDa  | 0            | 0           | 0            | 1.6333      | 1.2892       | FALSE     |
| 60S ribosomal protein L36 OS=Mus musculus GN=Rpl36 PE=1 SV=1                             | Q6ZWZ4           | Rpl36        | 12 kDa  | 0            | 0           | 0            | 1.225       | 1.2892       | FALSE     |
| 60S ribosomal protein L36a OS=Mus musculus GN=Rpl36a PE=1 SV=2                           | P83882 (+1)      | Rpl36a       | 12 kDa  | 0            | 0           | 0            | 1.6333      | 1.2892       | FALSE     |
| 60S ribosomal protein L6 OS=Mus musculus GN=Rpl6 PE=1 SV=3                               | P47911 (+1)      | Rpl6         | 34 kDa  | 0            | 0           | 0            | 6.5332      | 7.3052       | FALSE     |
| 60S ribosomal protein L7 OS=Mus musculus GN=Rpl7 PE=1 SV=2                               | P14148 (+2)      | Rpl7         | 31 kDa  | 0            | 3.1957      | 0            | 4.8999      | 6.4458       | FALSE     |
| 60S ribosomal protein L8 OS=Mus musculus GN=Rpl8 PE=1 SV=2                               | P62918 (+1)      | Rpl8         | 28 kDa  | 0            | 0           | 0            | 5.7166      | 4.2972       | FALSE     |
| 7-dehydrocholesterol reductase OS=Mus musculus GN=Dhcr7 PE=1 SV=1                        | A0A140LIT2 (+2)  | Dhcr7        | 54 kDa  | 0            | 0           | 0            | 1.225       | 0.85944      | FALSE     |
| 7-methylguanosine phosphate-specific 5'-nucleotidase OS=Mus musculus GN=Nt5c3b PE=1 SV=3 | Q3UFY7           | Nt5c3b       | 34 kDa  | 0            | 0           | 0            | 1.6333      | 0            | FALSE     |
| A kinase (PRKA) anchor protein (Gravin) 12 OS=Mus musculus GN=Akap12 PE=2 SV=1           | B2RRE0 (+1)      | Akap12       | 181 kDa | 0            | 0           | 0            | 1.225       | 0            | FALSE     |
| A-kinase anchor protein 1, mitochondrial OS=Mus musculus GN=Akap1 PE=1 SV=4              | O08715           | Akap1        | 92 kDa  | 0            | 0           | 0            | 0.81665     | 0            | FALSE     |
| Abce1 protein (Fragment) OS=Mus musculus GN=Abce1 PE=2 SV=1                              | Q6NXX7           | Abce1        | 65 kDa  | 0            | 0           | 0            | 1.6333      | 3.4377       | FALSE     |
| Acetoacetyl-CoA synthetase OS=Mus musculus GN=Aacs PE=1 SV=1                             | Q9D2R0           | Aacs         | 75 kDa  | 0            | 0           | 0            | 3.6749      | 4.2972       | FALSE     |

| Identified Proteins (2666)                                                                                         | Accession Number | Alternate ID | MW      | VPSko-biotin | ctrl-biotin | VPSoe-biotin | ctrl lysate | VPSoe lysate | enriched? |
|--------------------------------------------------------------------------------------------------------------------|------------------|--------------|---------|--------------|-------------|--------------|-------------|--------------|-----------|
| Acetolactate synthase-like protein OS=Mus musculus GN=Ilvbl PE=1 SV=1                                              | Q8BU33           | Ilvbl        | 68 kDa  | 0            | 0           | 0            | 1.6333      | 0            | FALSE     |
| Acetyl-CoA acetyltransferase, cytosolic OS=Mus musculus GN=Acat2 PE=1 SV=2                                         | Q8CAY6           | Acat2        | 41 kDa  | 0            | 0           | 0            | 3.2666      | 4.2972       | FALSE     |
| Acetyl-coenzyme A transporter 1 OS=Mus musculus GN=Slc33a1 PE=1 SV=1                                               | Q99J27           | Slc33a1      | 61 kDa  | 0            | 0           | 0            | 0           | 0.85944      | FALSE     |
| Acid phosphatase 1, soluble OS=Mus musculus GN=Acp1 PE=2 SV=1                                                      | Q4VAI2 (+1)      | Acp1         | 18 kDa  | 0            | 0           | 0            | 1.225       | 1.7189       | FALSE     |
| Acidic leucine-rich nuclear phosphoprotein 32 family member A (Fragment) OS=Mus musculus GN=Anp32a PE=1 SV=1       | D3YYE1 (+2)      | Anp32a       | 23 kDa  | 0            | 0           | 0            | 0           | 1.7189       | FALSE     |
| Acidic leucine-rich nuclear phosphoprotein 32 family member E OS=Mus musculus GN=Anp32e PE=1 SV=1                  | P97822 (+1)      | Anp32e       | 30 kDa  | 0            | 0           | 0            | 2.8583      | 2.5783       | FALSE     |
| Actin-like 6A, isoform CRA_a OS=Mus musculus GN=Actl6a PE=1 SV=1                                                   | Q505L1 (+1)      | Actl6a       | 47 kDa  | 0            | 0           | 0            | 0.81665     | 1.2892       | FALSE     |
| Actin-related protein 10 OS=Mus musculus GN=Actr10 PE=1 SV=2                                                       | Q9QZB7           | Actr10       | 46 kDa  | 0            | 0           | 0            | 1.6333      | 0.85944      | FALSE     |
| Actin-related protein 2 OS=Mus musculus GN=Actr2 PE=1 SV=1                                                         | P61161 (+1)      | Actr2        | 45 kDa  | 0            | 0           | 0            | 6.9416      | 6.4458       | FALSE     |
| Actin-related protein 2/3 complex subunit 3 OS=Mus musculus GN=Arpc3 PE=1 SV=1                                     | H7BWZ3 (+1)      | Arpc3        | 20 kDa  | 0            | 0           | 0            | 0.81665     | 0            | FALSE     |
| Actin-related protein 2/3 complex subunit 4 OS=Mus musculus GN=Arpc4 PE=1 SV=3                                     | P59999 (+2)      | Arpc4        | 20 kDa  | 0            | 0           | 0            | 1.6333      | 1.7189       | FALSE     |
| Activated RNA polymerase II transcriptional coactivator p15 OS=Mus musculus GN=Sub1 PE=1 SV=1                      | P11031           | Sub1         | 14 kDa  | 0            | 0           | 0            | 0.81665     | 3.008        | FALSE     |
| Activating signal cointegrator 1 complex subunit 3 OS=Mus musculus GN=Ascc3 PE=1 SV=1                              | E9PZJ8           | Ascc3        | 251 kDa | 0            | 0           | 0            | 1.225       | 0            | FALSE     |
| Acyl-CoA dehydrogenase family member 9, mitochondrial OS=Mus musculus GN=Acad9 PE=1 SV=1                           | Q8JZN5           | Acad9        | 69 kDa  | 0            | 0           | 0            | 1.225       | 3.4377       | FALSE     |
| Acyl-CoA synthetase family member 2, mitochondrial OS=Mus musculus GN=Acsf2 PE=1 SV=1                              | Q8VWCW8          | Acsf2        | 68 kDa  | 0            | 0           | 0            | 3.6749      | 3.4377       | FALSE     |
| Acyl-CoA synthetase long-chain family member 5, isoform CRA_b OS=Mus musculus GN=Acsf5 PE=1 SV=1                   | Q3UC67 (+2)      | Acsf5        | 76 kDa  | 0            | 0           | 0            | 2.0416      | 1.7189       | FALSE     |
| Acyl-Coenzyme A binding domain containing 3, isoform CRA_b OS=Mus musculus GN=Acbd3 PE=1 SV=1                      | A0A0R4J079 (+2)  | Acbd3        | 60 kDa  | 0            | 0           | 0            | 1.6333      | 1.7189       | FALSE     |
| Acyl-Coenzyme A binding domain containing 6 OS=Mus musculus GN=Acbd6 PE=2 SV=1                                     | Q14BV7 (+1)      | Acbd6        | 31 kDa  | 0            | 0           | 0            | 0.81665     | 0            | FALSE     |
| Acylamino-acid-releasing enzyme OS=Mus musculus GN=Apeh PE=1 SV=3                                                  | Q8R146           | Apeh         | 82 kDa  | 0            | 0           | 0            | 1.6333      | 3.008        | FALSE     |
| Acylglycerol kinase, mitochondrial OS=Mus musculus GN=Agk PE=1 SV=1                                                | Q9ESW4           | Agk          | 47 kDa  | 0            | 0           | 0            | 0.81665     | 0.85944      | FALSE     |
| Adapter molecule crk OS=Mus musculus GN=Crk PE=1 SV=2                                                              | Q5ND50           | Crk          | 29 kDa  | 0            | 0           | 0            | 2.8583      | 2.1486       | FALSE     |
| Adenine phosphoribosyltransferase OS=Mus musculus GN=Aprt PE=1 SV=2                                                | P08030           | Aprt         | 20 kDa  | 0            | 0           | 0            | 2.8583      | 3.8675       | FALSE     |
| Adenosine kinase OS=Mus musculus GN=Adk PE=1 SV=2                                                                  | P55264           | Adk          | 40 kDa  | 0            | 0           | 0            | 3.2666      | 4.7269       | FALSE     |
| Adenylate kinase 2, mitochondrial OS=Mus musculus GN=Ak2 PE=1 SV=5                                                 | Q9WTP6           | Ak2          | 26 kDa  | 0            | 0           | 0            | 0.81665     | 1.7189       | FALSE     |
| Adenylate kinase isoenzyme 1 OS=Mus musculus GN=Ak1 PE=1 SV=1                                                      | Q9R0Y5           | Ak1          | 22 kDa  | 0            | 0           | 0            | 2.8583      | 1.2892       | FALSE     |
| Adenylosuccinate lyase OS=Mus musculus GN=Adsl PE=1 SV=2                                                           | P54822 (+1)      | Adsl         | 55 kDa  | 0            | 0           | 0            | 2.45        | 3.008        | FALSE     |
| Adenylosuccinate synthetase isozyme 2 OS=Mus musculus GN=Adss PE=1 SV=1                                            | B9EIE9 (+1)      | Adss         | 50 kDa  | 0            | 0           | 0            | 4.0833      | 3.8675       | FALSE     |
| Adenylyl cyclase-associated protein 2 OS=Mus musculus GN=Cap2 PE=1 SV=1                                            | Q9CYT6           | Cap2         | 53 kDa  | 0            | 0           | 0            | 0.81665     | 1.2892       | FALSE     |
| Adipocyte enhancer-binding protein 1 OS=Mus musculus GN=Aebp1 PE=1 SV=1                                            | Q640N1           | Aebp1        | 128 kDa | 0            | 0           | 0            | 1.6333      | 1.7189       | FALSE     |
| ADP-dependent glucokinase OS=Mus musculus GN=Adpgk PE=1 SV=1                                                       | A0A1L1SSF2 (+3)  | Adpgk        | 54 kDa  | 0            | 0           | 0            | 1.225       | 1.2892       | FALSE     |
| ADP-ribose pyrophosphatase, mitochondrial OS=Mus musculus GN=Nudt9 PE=1 SV=1                                       | Q8BVU5           | Nudt9        | 39 kDa  | 0            | 0           | 0            | 1.6333      | 0.85944      | FALSE     |
| ADP-ribosylation factor 5 OS=Mus musculus GN=Arf5 PE=1 SV=2                                                        | P84084           | Arf5         | 21 kDa  | 0            | 0           | 0            | 5.3082      | 5.5863       | FALSE     |
| ADP-ribosylation factor 6 OS=Mus musculus GN=Arf6 PE=1 SV=2                                                        | P62331 (+1)      | Arf6         | 20 kDa  | 0            | 0           | 0            | 0.81665     | 0.85944      | FALSE     |
| ADP-ribosylation factor GTPase activating protein 1, isoform CRA_d (Fragment) OS=Mus musculus GN=Arfgap1 PE=1 SV=1 | Q05DE0 (+2)      | Arfgap1      | 43 kDa  | 0            | 0           | 0            | 2.45        | 2.1486       | FALSE     |
| ADP-ribosylation factor GTPase-activating protein 2 OS=Mus musculus GN=Arfgap2 PE=1 SV=1                           | Q99K28           | Arfgap2      | 57 kDa  | 0            | 0           | 0            | 2.0416      | 3.008        | FALSE     |
| ADP-ribosylation factor-binding protein GGA1 OS=Mus musculus GN=Gga1 PE=1 SV=1                                     | Q8R0H9           | Gga1         | 70 kDa  | 0            | 0           | 0            | 1.225       | 0.85944      | FALSE     |
| ADP-ribosylation factor-interacting protein 1 OS=Mus musculus GN=Arfp1 PE=1 SV=1                                   | G5E8V9           | Arfp1        | 42 kDa  | 0            | 0           | 0            | 2.8583      | 2.1486       | FALSE     |
| ADP-ribosylation factor-like protein 8B OS=Mus musculus GN=Arl8b PE=1 SV=1                                         | Q9CQW2 (+1)      | Arl8b        | 22 kDa  | 0            | 0           | 0            | 2.0416      | 2.1486       | FALSE     |
| ADP-sugar pyrophosphatase OS=Mus musculus GN=Nudt5 PE=1 SV=1                                                       | Q9JKX6           | Nudt5        | 24 kDa  | 0            | 0           | 0            | 2.45        | 1.7189       | FALSE     |
| Afadin OS=Mus musculus GN=Afdn PE=1 SV=1                                                                           | E9Q9C3 (+1)      | Afdn         | 207 kDa | 0            | 0           | 0            | 2.45        | 2.1486       | FALSE     |
| Aflatoxin B1 aldehyde reductase member 2 OS=Mus musculus GN=Akr7a2 PE=1 SV=3                                       | Q8CG76           | Akr7a2       | 41 kDa  | 0            | 0           | 0            | 1.225       | 0.85944      | FALSE     |
| AH receptor-interacting protein OS=Mus musculus GN=Aip PE=1 SV=1                                                   | O08915           | Aip          | 38 kDa  | 0            | 0           | 0            | 1.6333      | 2.1486       | FALSE     |
| AHNAK nucleoprotein 2 (Fragment) OS=Mus musculus GN=Ahnak2 PE=1 SV=1                                               | F7DBB3           | Ahnak2       | 166 kDa | 0            | 0           | 0            | 1.6333      | 2.1486       | FALSE     |
| Aladin OS=Mus musculus GN=Aaas PE=1 SV=1                                                                           | P58742 (+2)      | Aaas         | 59 kDa  | 0            | 0           | 0            | 1.225       | 1.7189       | FALSE     |
| Alanine aminotransferase 2 OS=Mus musculus GN=Gpt2 PE=1 SV=1                                                       | Q8BGT5           | Gpt2         | 58 kDa  | 0            | 0           | 0            | 0.81665     | 0.85944      | FALSE     |
| Alanyl-tRNA editing protein Aarsd1 OS=Mus musculus GN=Aarsd1 PE=1 SV=2                                             | Q3THG9           | Aarsd1       | 45 kDa  | 0            | 0           | 0            | 0.81665     | 1.7189       | FALSE     |
| Alcohol dehydrogenase 1 OS=Mus musculus GN=Adh1 PE=1 SV=2                                                          | P00329 (+1)      | Adh1         | 40 kDa  | 0            | 0           | 0            | 0           | 0.85944      | FALSE     |
| Alcohol dehydrogenase class-3 OS=Mus musculus GN=Adh5 PE=1 SV=3                                                    | P28474 (+1)      | Adh5         | 40 kDa  | 0            | 0           | 0            | 3.2666      | 4.2972       | FALSE     |
| Aldehyde dehydrogenase family 16 member A1 OS=Mus musculus GN=Aldh16a1 PE=1 SV=2                                   | Q571I9           | Aldh16a1     | 85 kDa  | 0            | 0           | 0            | 2.45        | 1.2892       | FALSE     |
| Aldehyde dehydrogenase OS=Mus musculus GN=Aldh3a2 PE=3 SV=1                                                        | Q99PH3 (+1)      | Aldh3a2      | 54 kDa  | 0            | 0           | 0            | 2.45        | 0.85944      | FALSE     |
| Aldehyde reductase OS=Mus musculus GN=Akr1a1 PE=1 SV=1                                                             | Q540D7 (+1)      | Akr1a1       | 37 kDa  | 0            | 0           | 0            | 4.4916      | 3.8675       | FALSE     |



| Identified Proteins (2666)                                                                                     | Accession Number | Alternate ID | MW      | VPSko-biotin | ctrl-biotin | VPSoe-biotin | ctrl lysate | VPSoe lysate | enriched? |
|----------------------------------------------------------------------------------------------------------------|------------------|--------------|---------|--------------|-------------|--------------|-------------|--------------|-----------|
| Aldheyde dehydrogenase family 5, subfamily A1 OS=Mus musculus GN=Aldh5a1 PE=1 SV=1                             | B2RS41 (+1)      | Aldh5a1      | 56 kDa  | 0            | 0           | 0            | 0.81665     | 1.7189       | FALSE     |
| Aldo-keto reductase family 1, member B3 (Aldose reductase) OS=Mus musculus GN=Akr1b3 PE=2 SV=2                 | Q5U415           | Akr1b3       | 36 kDa  | 0            | 0           | 0            | 2.45        | 2.1486       | FALSE     |
| Aldose reductase-related protein 2 OS=Mus musculus GN=Akr1b8 PE=1 SV=2                                         | P45377           | Akr1b8       | 36 kDa  | 0            | 0           | 0            | 2.0416      | 1.7189       | FALSE     |
| Alkylglycerone-phosphate synthase OS=Mus musculus GN=Agps PE=1 SV=1                                            | A2AL50 (+1)      | Agps         | 74 kDa  | 0            | 0           | 0            | 3.6749      | 4.7269       | FALSE     |
| Alpha-1,4 glucan phosphorylase OS=Mus musculus GN=Pygb PE=2 SV=1                                               | Q3TFQ8 (+2)      | Pygb         | 97 kDa  | 0            | 0           | 0            | 7.7582      | 4.2972       | FALSE     |
| Alpha-adducin OS=Mus musculus GN=Add1 PE=1 SV=2                                                                | Q9QYCO           | Add1         | 81 kDa  | 0            | 0           | 0            | 1.225       | 0.85944      | FALSE     |
| Alpha-aminoacidic semialdehyde dehydrogenase OS=Mus musculus GN=Aldh7a1 PE=1 SV=4                              | Q9DBF1           | Aldh7a1      | 59 kDa  | 0            | 0           | 0            | 4.4916      | 3.4377       | FALSE     |
| Alpha-centractin OS=Mus musculus GN=Actr1a PE=1 SV=1                                                           | P61164           | Actr1a       | 43 kDa  | 0            | 0           | 0            | 1.225       | 2.5783       | FALSE     |
| Alpha-enolase OS=Mus musculus GN=Eno1 PE=1 SV=3                                                                | P17182 (+1)      | Eno1         | 47 kDa  | 23.94        | 22.37       | 32.211       | 38.383      | 39.534       | FALSE     |
| Alpha-ketoglutarate-dependent dioxygenase FTO OS=Mus musculus GN=Fto PE=1 SV=1                                 | Q8BGW1           | Fto          | 58 kDa  | 0            | 0           | 0            | 0           | 0.85944      | FALSE     |
| Alpha-mannosidase 2 OS=Mus musculus GN=Man2a1 PE=1 SV=2                                                        | P27046           | Man2a1       | 132 kDa | 0            | 0           | 0            | 4.4916      | 5.1566       | FALSE     |
| Alpha-methylacyl-CoA racemase OS=Mus musculus GN=Amacr PE=1 SV=4                                               | O09174 (+1)      | Amacr        | 42 kDa  | 0            | 0           | 0            | 0.81665     | 0            | FALSE     |
| Alpha-parvin OS=Mus musculus GN=Parva PE=1 SV=1                                                                | Q3UF75 (+1)      | Parva        | 38 kDa  | 0            | 0           | 0            | 2.45        | 1.2892       | FALSE     |
| Alpha-soluble NSF attachment protein OS=Mus musculus GN=Napa PE=1 SV=1                                         | Q9DB05           | Napa         | 33 kDa  | 0            | 0           | 0            | 0.81665     | 0            | FALSE     |
| Amino acid transporter OS=Mus musculus GN=Slc1a5 PE=2 SV=1                                                     | Q3UFR4 (+2)      | Slc1a5       | 58 kDa  | 0            | 0           | 0            | 1.225       | 0            | FALSE     |
| Aminopeptidase B OS=Mus musculus GN=Rnpep PE=1 SV=2                                                            | Q8VCT3           | Rnpep        | 72 kDa  | 0            | 0           | 0            | 1.6333      | 1.7189       | FALSE     |
| AMP deaminase OS=Mus musculus GN=Ampd2 PE=1 SV=1                                                               | A2AE27 (+1)      | Ampd2        | 95 kDa  | 0            | 0           | 0            | 1.6333      | 2.1486       | FALSE     |
| AMP deaminase OS=Mus musculus GN=Ampd3 PE=1 SV=1                                                               | A0A1L1SRX2 (+1)  | Ampd3        | 90 kDa  | 0            | 0           | 0            | 3.2666      | 0.85944      | FALSE     |
| Amylo-1,6-glucosidase, 4-alpha-glucanotransferase OS=Mus musculus GN=AgI PE=1 SV=1                             | F8VFN4           | AgI          | 174 kDa | 0            | 0           | 0            | 0           | 1.2892       | FALSE     |
| Amyloid beta (A4) protein-binding, family B, member 1 interacting protein OS=Mus musculus GN=Apbb1ip PE=1 SV=1 | B1AYC9 (+1)      | Apbb1ip      | 74 kDa  | 0            | 0           | 0            | 1.225       | 0            | FALSE     |
| Amyloid-beta A4 precursor protein-binding family B member 2 OS=Mus musculus GN=Apbb2 PE=1 SV=1                 | E9PWH3 (+3)      | Apbb2        | 81 kDa  | 0            | 0           | 0            | 0.81665     | 0.85944      | FALSE     |
| Amyloid-beta A4 protein OS=Mus musculus GN=App PE=1 SV=3                                                       | P12023 (+2)      | App          | 87 kDa  | 0            | 0           | 0            | 0.81665     | 0            | FALSE     |
| AN1-type zinc finger protein 5 OS=Mus musculus GN=Zfand5 PE=1 SV=1                                             | O88878           | Zfand5       | 23 kDa  | 0            | 0           | 0            | 0           | 1.2892       | FALSE     |
| AN1-type zinc finger protein 6 OS=Mus musculus GN=Zfand6 PE=1 SV=1                                             | Q9DCH6           | Zfand6       | 24 kDa  | 0            | 0           | 0            | 1.225       | 1.7189       | FALSE     |
| Anamorsin OS=Mus musculus GN=Ciapi1 PE=1 SV=2                                                                  | F8WIK0 (+1)      | Ciapi1       | 33 kDa  | 0            | 0           | 0            | 0           | 0.85944      | FALSE     |
| Anaphase promoting complex subunit 2 OS=Mus musculus GN=Anapc2 PE=2 SV=1                                       | Q3U430 (+2)      | Anapc2       | 95 kDa  | 0            | 0           | 0            | 1.225       | 0            | FALSE     |
| Anaphase-promoting complex subunit 7 OS=Mus musculus GN=Anapc7 PE=1 SV=3                                       | Q9WVM3           | Anapc7       | 63 kDa  | 0            | 0           | 0            | 0.81665     | 0            | FALSE     |
| Angio-associated migratory protein OS=Mus musculus GN=Aamp PE=1 SV=1                                           | J3QN89 (+3)      | Aamp         | 47 kDa  | 0            | 0           | 0            | 0           | 0.85944      | FALSE     |
| Anillin OS=Mus musculus GN=Anln PE=1 SV=2                                                                      | Q8K298           | Anln         | 123 kDa | 0            | 0           | 0            | 3.2666      | 4.2972       | FALSE     |
| Anion exchange protein OS=Mus musculus GN=Slc4a7 PE=2 SV=1                                                     | U3RF68           | Slc4a7       | 135 kDa | 0            | 0           | 0            | 1.225       | 1.2892       | FALSE     |
| Ankyrin OS=Mus musculus GN=Rai14 PE=1 SV=1                                                                     | Q9EP71           | Rai14        | 109 kDa | 0            | 0           | 0            | 1.6333      | 0.85944      | FALSE     |
| Ankyrin repeat and FYVE domain containing 1 OS=Mus musculus GN=Ankfy1 PE=2 SV=1                                | B7ZP20 (+1)      | Ankfy1       | 129 kDa | 0            | 0           | 0            | 2.8583      | 1.2892       | FALSE     |
| Annexin A11 OS=Mus musculus GN=Anxa11 PE=1 SV=2                                                                | P97384           | Anxa11       | 54 kDa  | 0            | 0           | 0            | 0           | 1.2892       | FALSE     |
| Annexin A4 OS=Mus musculus GN=Anxa4 PE=1 SV=4                                                                  | P97429 (+1)      | Anxa4        | 36 kDa  | 3.6831       | 0           | 3.5789       | 5.7166      | 5.1566       | FALSE     |
| Annexin OS=Mus musculus GN=Anxa6 PE=1 SV=1                                                                     | F8WIT2           | Anxa6        | 75 kDa  | 0            | 9.5872      | 0            | 17.558      | 10.743       | FALSE     |
| Annexin OS=Mus musculus GN=Anxa7 PE=2 SV=1                                                                     | Q922A2           | Anxa7        | 50 kDa  | 0            | 0           | 0            | 3.2666      | 2.5783       | FALSE     |
| Anoctamin-6 OS=Mus musculus GN=Ano6 PE=1 SV=1                                                                  | Q6P9J9           | Ano6         | 106 kDa | 0            | 0           | 0            | 1.6333      | 0.85944      | FALSE     |
| AP complex subunit beta OS=Mus musculus GN=Ap1b1 PE=2 SV=1                                                     | Q8CC13           | Ap1b1        | 105 kDa | 0            | 0           | 0            | 4.0833      | 3.8675       | FALSE     |
| AP complex subunit beta OS=Mus musculus GN=Ap2b1 PE=2 SV=1                                                     | Q5SWR1 (+1)      | Ap2b1        | 106 kDa | 0            | 4.7936      | 0            | 4.8999      | 5.5863       | FALSE     |
| AP-1 complex subunit mu-1 OS=Mus musculus GN=Ap1m1 PE=1 SV=3                                                   | P35585 (+1)      | Ap1m1        | 49 kDa  | 0            | 0           | 0            | 2.0416      | 2.1486       | FALSE     |
| AP-2 complex subunit alpha-1 OS=Mus musculus GN=Ap2a1 PE=1 SV=1                                                | P17426           | Ap2a1        | 108 kDa | 0            | 0           | 0            | 5.7166      | 3.008        | FALSE     |
| AP-2 complex subunit alpha-2 OS=Mus musculus GN=Ap2a2 PE=1 SV=2                                                | P17427 (+2)      | Ap2a2        | 104 kDa | 0            | 3.1957      | 3.5789       | 5.3082      | 5.1566       | FALSE     |
| AP-2 complex subunit mu OS=Mus musculus GN=Ap2m1 PE=1 SV=1                                                     | P84091 (+3)      | Ap2m1        | 50 kDa  | 0            | 0           | 0            | 3.2666      | 4.7269       | FALSE     |
| AP-3 complex subunit beta-1 OS=Mus musculus GN=Ap3b1 PE=1 SV=2                                                 | Q9Z1T1           | Ap3b1        | 123 kDa | 0            | 0           | 0            | 3.2666      | 3.008        | FALSE     |
| AP-3 complex subunit delta-1 OS=Mus musculus GN=Ap3d1 PE=1 SV=1                                                | O54774           | Ap3d1        | 135 kDa | 0            | 0           | 0            | 2.45        | 1.7189       | FALSE     |
| AP-3 complex subunit mu-1 OS=Mus musculus GN=Ap3m1 PE=1 SV=1                                                   | Q9JKC8           | Ap3m1        | 47 kDa  | 0            | 0           | 0            | 2.45        | 2.1486       | FALSE     |
| AP2-associated protein kinase 1 OS=Mus musculus GN=Aak1 PE=1 SV=2                                              | Q3UHH0           | Aak1         | 103 kDa | 0            | 0           | 0            | 1.6333      | 1.2892       | FALSE     |
| Apoptosis inhibitor 5 OS=Mus musculus GN=Api5 PE=1 SV=2                                                        | O35841           | Api5         | 57 kDa  | 0            | 0           | 0            | 3.2666      | 3.8675       | FALSE     |
| Apoptosis regulator BAX (Fragment) OS=Mus musculus GN=Bax PE=1 SV=1                                            | A0A1B0GTA4 (+6)  | Bax          | 20 kDa  | 0            | 0           | 0            | 0.81665     | 0.85944      | FALSE     |
| Apoptosis-inducing factor 1, mitochondrial OS=Mus musculus GN=Aifm1 PE=1 SV=1                                  | Q9Z0X1           | Aifm1        | 67 kDa  | 0            | 0           | 0            | 3.6749      | 4.7269       | FALSE     |
| ARF GTPase-activating protein GIT2 OS=Mus musculus GN=Git2 PE=1 SV=2                                           | Q9JLQ2           | Git2         | 79 kDa  | 0            | 0           | 0            | 1.225       | 0            | FALSE     |

| Identified Proteins (2666)                                                                  | Accession Number | Alternate ID | MW      | VPSko-biotin | ctrl-biotin | VPSoe-biotin | ctrl lysate | VPSoe lysate | enriched? |
|---------------------------------------------------------------------------------------------|------------------|--------------|---------|--------------|-------------|--------------|-------------|--------------|-----------|
| Arf-GAP with SH3 domain, ANK repeat and PH domain-containing protein 1 OS=Mus musculus G    | E9QN63 (+3)      | Asap1        | 127 kDa | 0            | 0           | 0            | 1.225       | 0            | FALSE     |
| Argininosuccinate lyase OS=Mus musculus GN=Asl PE=1 SV=1                                    | Q91YI0           | Asl          | 52 kDa  | 0            | 0           | 0            | 0.81665     | 0            | FALSE     |
| Arginyl-tRNA-protein transferase 1 OS=Mus musculus GN=Ate1 PE=1 SV=1                        | A0A1L1SQ41 (+2)  | Ate1         | 64 kDa  | 0            | 0           | 0            | 0.81665     | 0            | FALSE     |
| Arp2/3 complex 34 kDa subunit (Fragment) OS=Mus musculus GN=Arpc2 PE=2 SV=1                 | Q3UA52 (+1)      | Arpc2        | 43 kDa  | 0            | 0           | 0            | 4.0833      | 4.2972       | FALSE     |
| Arpin OS=Mus musculus GN=Arpin PE=1 SV=1                                                    | Q9D0A3           | Arpin        | 25 kDa  | 0            | 0           | 0            | 2.45        | 2.1486       | FALSE     |
| Aryl hydrocarbon receptor nuclear translocator OS=Mus musculus GN=Arnt PE=1 SV=2            | E9QLT6 (+3)      | Arnt         | 85 kDa  | 0            | 0           | 0            | 0           | 0.85944      | FALSE     |
| Arylamine N-acetyltransferase 2 OS=Mus musculus GN=Nat2 PE=1 SV=1                           | P50295 (+2)      | Nat2         | 34 kDa  | 0            | 0           | 0            | 0.81665     | 0            | FALSE     |
| Arylsulfatase B OS=Mus musculus GN=Arsb PE=1 SV=1                                           | A0A0R4J138       | Arsb         | 60 kDa  | 0            | 0           | 0            | 1.6333      | 1.7189       | FALSE     |
| Asparagine synthetase [glutamine-hydrolyzing] OS=Mus musculus GN=Asns PE=1 SV=3             | Q61024           | Asns         | 64 kDa  | 3.6831       | 6.3914      | 3.5789       | 8.9832      | 11.602       | FALSE     |
| Asparagine-tRNA ligase, cytoplasmic OS=Mus musculus GN=Nars PE=1 SV=2                       | Q8BP47           | Nars         | 64 kDa  | 0            | 0           | 0            | 11.841      | 8.1647       | FALSE     |
| Aspartate aminotransferase, cytoplasmic OS=Mus musculus GN=Got1 PE=1 SV=3                   | P05201           | Got1         | 46 kDa  | 0            | 0           | 0            | 4.4916      | 6.8755       | FALSE     |
| Aspartyl/asparaginyl beta-hydroxylase OS=Mus musculus GN=Asph PE=1 SV=1                     | A2A185 (+3)      | Asph         | 81 kDa  | 0            | 0           | 0            | 2.8583      | 3.008        | FALSE     |
| Aspartylglucosaminidase OS=Mus musculus GN=Aga PE=1 SV=1                                    | A2RSS6 (+1)      | Aga          | 37 kDa  | 0            | 0           | 0            | 1.225       | 1.7189       | FALSE     |
| Ataxin-2 OS=Mus musculus GN=Atxn2 PE=1 SV=1                                                 | O70305           | Atxn2        | 136 kDa | 0            | 0           | 0            | 2.45        | 3.4377       | FALSE     |
| Atlantin-3 OS=Mus musculus GN=Atl3 PE=1 SV=1                                                | Q91YH5           | Atl3         | 61 kDa  | 0            | 0           | 0            | 4.0833      | 3.008        | FALSE     |
| ATP-binding cassette sub-family F member 1 OS=Mus musculus GN=Abcf1 PE=1 SV=1               | Q6P542           | Abcf1        | 95 kDa  | 0            | 0           | 0            | 5.7166      | 6.8755       | FALSE     |
| ATP-binding cassette sub-family F member 3 OS=Mus musculus GN=Abcf3 PE=1 SV=1               | Q8K268           | Abcf3        | 80 kDa  | 0            | 0           | 0            | 0           | 1.7189       | FALSE     |
| ATP-binding cassette, sub-family B (MDR/TAP), member 1B OS=Mus musculus GN=Abcb1b PE=1 S    | B2RUR3 (+1)      | Abcb1b       | 141 kDa | 0            | 0           | 0            | 0           | 0.85944      | FALSE     |
| ATP-binding cassette, sub-family C (CFTR/MRP), member 4 OS=Mus musculus GN=Abcc4 PE=1 SV=1  | E9Q236 (+1)      | Abcc4        | 149 kDa | 0            | 0           | 0            | 0           | 1.7189       | FALSE     |
| ATP-citrate synthase OS=Mus musculus GN=Acly PE=1 SV=1                                      | Q3V117           | Acly         | 121 kDa | 0            | 0           | 7.1579       | 8.5749      | 11.602       | FALSE     |
| ATP-dependent (S)-NAD(P)H-hydrate dehydratase OS=Mus musculus GN=Naxd PE=1 SV=1             | J3QMM7 (+2)      | Naxd         | 35 kDa  | 0            | 0           | 0            | 0           | 1.7189       | FALSE     |
| ATP-dependent 6-phosphofructokinase, liver type OS=Mus musculus GN=Pfkl PE=1 SV=4           | P12382           | Pfkl         | 85 kDa  | 5.5246       | 3.1957      | 5.3684       | 8.1665      | 9.8835       | FALSE     |
| ATP-dependent 6-phosphofructokinase, muscle type OS=Mus musculus GN=Pfkm PE=1 SV=3          | P47857           | Pfkm         | 85 kDa  | 0            | 0           | 0            | 4.0833      | 6.4458       | FALSE     |
| ATP-dependent 6-phosphofructokinase, platelet type OS=Mus musculus GN=Pfkp PE=1 SV=1        | Q9WUA3           | Pfkp         | 85 kDa  | 0            | 0           | 0            | 4.4916      | 7.3052       | FALSE     |
| ATP-dependent Clp protease ATP-binding subunit clpX-like, mitochondrial OS=Mus musculus GN= | Q6P8N8 (+1)      | Clpx         | 67 kDa  | 0            | 0           | 0            | 0.81665     | 3.4377       | FALSE     |
| ATP-dependent DNA helicase OS=Mus musculus GN=Recql PE=1 SV=1                               | E9Q3N0 (+2)      | Recql        | 71 kDa  | 0            | 0           | 0            | 0.81665     | 0            | FALSE     |
| ATP-dependent RNA helicase A OS=Mus musculus GN=Dhx9 PE=1 SV=2                              | O70133           | Dhx9         | 149 kDa | 0            | 0           | 0            | 0           | 0.85944      | FALSE     |
| ATP-dependent RNA helicase DDX19A OS=Mus musculus GN=Ddx19a PE=1 SV=2                       | Q61655           | Ddx19a       | 54 kDa  | 0            | 0           | 0            | 3.6749      | 4.2972       | FALSE     |
| ATP-dependent RNA helicase DDX42 OS=Mus musculus GN=Ddx42 PE=1 SV=3                         | Q810A7           | Ddx42        | 102 kDa | 0            | 0           | 0            | 1.225       | 0            | FALSE     |
| ATP-dependent RNA helicase DHX29 OS=Mus musculus GN=Dhx29 PE=1 SV=1                         | Q6PGC1           | Dhx29        | 154 kDa | 0            | 0           | 0            | 1.225       | 0.85944      | FALSE     |
| ATP-dependent RNA helicase DHX36 OS=Mus musculus GN=Dhx36 PE=1 SV=2                         | Q8VHK9           | Dhx36        | 114 kDa | 0            | 0           | 0            | 1.225       | 1.2892       | FALSE     |
| ATP-dependent zinc metalloprotease YME1L1 OS=Mus musculus GN=Yme1l1 PE=1 SV=1               | O88967           | Yme1l1       | 80 kDa  | 0            | 0           | 0            | 1.6333      | 0.85944      | FALSE     |
| ATPase Asna1 OS=Mus musculus GN=Asna1 PE=1 SV=2                                             | O54984           | Asna1        | 39 kDa  | 0            | 0           | 0            | 1.225       | 2.1486       | FALSE     |
| ATPase inhibitor, mitochondrial OS=Mus musculus GN=Atpif1 PE=1 SV=2                         | O35143           | Atpif1       | 12 kDa  | 0            | 0           | 0            | 1.225       | 1.7189       | FALSE     |
| ATPase WRNIP1 OS=Mus musculus GN=Wrnip1 PE=1 SV=2                                           | Q91XU0           | Wrnip1       | 72 kDa  | 0            | 0           | 0            | 0           | 1.2892       | FALSE     |
| BAG family molecular chaperone regulator 2 OS=Mus musculus GN=Bag2 PE=1 SV=1                | Q91YN9           | Bag2         | 23 kDa  | 0            | 0           | 0            | 0.81665     | 0            | FALSE     |
| Band 4.1-like protein 1 OS=Mus musculus GN=Epb41l1 PE=1 SV=1                                | A2AUK5 (+2)      | Epb41l1      | 98 kDa  | 0            | 0           | 0            | 1.6333      | 2.1486       | FALSE     |
| Basement membrane-specific heparan sulfate proteoglycan core protein OS=Mus musculus GN=H   | E9PZ16           | Hspg2        | 470 kDa | 0            | 0           | 0            | 2.45        | 5.1566       | FALSE     |
| Beta-1,3-glucosyltransferase OS=Mus musculus GN=B3glct PE=1 SV=3                            | Q8BHT6           | B3glct       | 55 kDa  | 0            | 0           | 0            | 0.81665     | 1.2892       | FALSE     |
| Beta-1,4-galactosyltransferase 5 OS=Mus musculus GN=B4galt5 PE=2 SV=2                       | Q9JMK0 (+1)      | B4galt5      | 45 kDa  | 0            | 0           | 0            | 0           | 0.85944      | FALSE     |
| Beta-centractin OS=Mus musculus GN=Actr1b PE=1 SV=1                                         | Q8R5C5           | Actr1b       | 42 kDa  | 0            | 0           | 0            | 0           | 2.5783       | FALSE     |
| Beta-enolase OS=Mus musculus GN=Eno3 PE=1 SV=3                                              | P21550           | Eno3         | 47 kDa  | 0            | 0           | 0            | 20.825      | 16.759       | FALSE     |
| Beta-galactosidase OS=Mus musculus PE=2 SV=1                                                | Q8C847           |              | 85 kDa  | 0            | 0           | 0            | 2.0416      | 1.2892       | FALSE     |
| Beta-glucuronidase OS=Mus musculus GN=Gusb PE=2 SV=1                                        | Q3TW82           | Gusb         | 74 kDa  | 0            | 0           | 0            | 1.225       | 3.4377       | FALSE     |
| Bifunctional 3'-phosphoadenosine 5'-phosphosulfate synthase 1 OS=Mus musculus GN=Papss1 PE= | Q60967           | Papss1       | 71 kDa  | 0            | 0           | 0            | 2.0416      | 2.5783       | FALSE     |
| Bifunctional polynucleotide phosphatase/kinase OS=Mus musculus GN=Pnkp PE=1 SV=1            | G5E8N7 (+1)      | Pnkp         | 57 kDa  | 0            | 0           | 0            | 0.81665     | 0            | FALSE     |
| Bifunctional purine biosynthesis protein PURH OS=Mus musculus GN=Atic PE=1 SV=2             | Q9CWJ9           | Atic         | 64 kDa  | 0            | 0           | 0            | 10.208      | 11.173       | FALSE     |
| Biliverdin reductase A OS=Mus musculus GN=Blvra PE=1 SV=1                                   | Q9CY64           | Blvra        | 34 kDa  | 0            | 0           | 0            | 2.45        | 1.2892       | FALSE     |
| Biliverdin reductase B (Flavin reductase (NADPH)) OS=Mus musculus GN=Blvrb PE=1 SV=1        | Q3U6G1 (+1)      | Blvrb        | 22 kDa  | 0            | 0           | 0            | 2.8583      | 3.008        | FALSE     |
| Bin1 protein OS=Mus musculus GN=Bin1 PE=1 SV=1                                              | Q6P1B9           | Bin1         | 53 kDa  | 0            | 0           | 0            | 1.225       | 2.1486       | FALSE     |
| Bisphosphate 3'-nucleotidase 1, isoform CRA_a OS=Mus musculus GN=Bpnt1 PE=2 SV=1            | Q3U449           | Bpnt1        | 33 kDa  | 0            | 0           | 0            | 1.6333      | 0.85944      | FALSE     |

| Identified Proteins (2666)                                                                   | Accession Number | Alternate ID | MW      | VPSko-biotin | ctrl-biotin | VPSoe-biotin | ctrl lysate | VPSoe lysate | enriched? |
|----------------------------------------------------------------------------------------------|------------------|--------------|---------|--------------|-------------|--------------|-------------|--------------|-----------|
| Bleomycin hydrolase OS=Mus musculus GN=Blmh PE=1 SV=1                                        | Q8R016           | Blmh         | 53 kDa  | 0            | 0           | 0            | 1.6333      | 2.5783       | FALSE     |
| Brain cDNA, clone MNCb-1208, similar to Mus musculus mitogen activated protein kinase kinase | Q9JJE1           | Map2k1       | 43 kDa  | 0            | 0           | 0            | 3.2666      | 2.5783       | FALSE     |
| Branched-chain-amino-acid aminotransferase OS=Mus musculus GN=Bcat2 PE=1 SV=1                | A0A1B0GX27 (+3)  | Bcat2        | 43 kDa  | 0            | 0           | 0            | 2.45        | 1.7189       | FALSE     |
| BRCA2 and CDKN1A-interacting protein OS=Mus musculus GN=Bccip PE=1 SV=1                      | Q9CWI3           | Bccip        | 36 kDa  | 0            | 0           | 0            | 0.81665     | 0            | FALSE     |
| BRI3-binding protein OS=Mus musculus GN=Bri3bp PE=1 SV=1                                     | Q8BXV2           | Bri3bp       | 28 kDa  | 0            | 0           | 0            | 1.225       | 0.85944      | FALSE     |
| BRISC and BRCA1-A complex member 2 OS=Mus musculus GN=Babam2 PE=1 SV=3                       | D3Z7P0 (+1)      | Babam2       | 44 kDa  | 0            | 0           | 0            | 1.6333      | 0.85944      | FALSE     |
| BRISC complex subunit Abraxas 2 OS=Mus musculus GN=Abraxas2 PE=1 SV=1                        | Q3TCJ1 (+1)      | Abraxas2     | 47 kDa  | 0            | 0           | 0            | 1.225       | 0            | FALSE     |
| Bromodomain and WD repeat domain containing 2, isoform CRA_a OS=Mus musculus GN=Wdr11        | G5E8J3 (+1)      | Wdr11        | 136 kDa | 0            | 0           | 0            | 1.225       | 0            | FALSE     |
| BUB3-interacting and GLEBS motif-containing protein ZNF207 OS=Mus musculus GN=Znf207 PE=1    | Q9JMD0           | Znf207       | 53 kDa  | 0            | 0           | 0            | 1.225       | 0.85944      | FALSE     |
| C-1-tetrahydrofolate synthase, cytoplasmic OS=Mus musculus GN=Mthfd1 PE=1 SV=4               | Q922D8           | Mthfd1       | 101 kDa | 0            | 0           | 0            | 7.7582      | 7.7349       | FALSE     |
| C-Jun-amino-terminal kinase-interacting protein 3 OS=Mus musculus GN=Mapk8ip3 PE=1 SV=1      | E9Q6B6 (+5)      | Mapk8ip3     | 143 kDa | 0            | 0           | 0            | 1.225       | 1.2892       | FALSE     |
| C-terminal-binding protein 1 OS=Mus musculus GN=Ctbp1 PE=1 SV=1                              | A0A0J9YU62 (+2)  | Ctbp1        | 47 kDa  | 0            | 0           | 0            | 1.225       | 1.7189       | FALSE     |
| C-terminal-binding protein 2 OS=Mus musculus GN=Ctbp2 PE=1 SV=2                              | P56546 (+3)      | Ctbp2        | 49 kDa  | 0            | 0           | 0            | 1.225       | 1.7189       | FALSE     |
| C230096C10Rik protein OS=Mus musculus GN=Emc1 PE=2 SV=1                                      | A1L2Z3 (+2)      | Emc1         | 112 kDa | 0            | 0           | 0            | 1.6333      | 2.5783       | FALSE     |
| Calcium load-activated calcium channel (Fragment) OS=Mus musculus GN=Tmco1 PE=1 SV=1         | A0A0A6YVS2 (+2)  | Tmco1        | 22 kDa  | 0            | 0           | 0            | 0.81665     | 0            | FALSE     |
| Calcium uniporter protein, mitochondrial OS=Mus musculus GN=Mcu PE=1 SV=2                    | Q3UMR5           | Mcu          | 40 kDa  | 0            | 0           | 0            | 0           | 1.2892       | FALSE     |
| Calcium uptake protein 2, mitochondrial OS=Mus musculus GN=Micu2 PE=1 SV=2                   | Q8CD10           | Micu2        | 49 kDa  | 0            | 0           | 0            | 0.81665     | 0.85944      | FALSE     |
| Calcium/calmodulin-dependent protein kinase I OS=Mus musculus GN=Camk1 PE=1 SV=1             | Q3UY68 (+2)      | Camk1        | 42 kDa  | 0            | 0           | 0            | 0.81665     | 0            | FALSE     |
| Calcium/calmodulin-dependent protein kinase type II subunit delta OS=Mus musculus GN=Camk2   | E9Q1V9 (+1)      | Camk2d       | 55 kDa  | 0            | 0           | 0            | 2.0416      | 2.1486       | FALSE     |
| Calcium/calmodulin-dependent protein kinase type II subunit gamma OS=Mus musculus GN=Camk2g  | Q923T9           | Camk2g       | 60 kDa  | 0            | 0           | 0            | 1.6333      | 3.4377       | FALSE     |
| Calycylin-binding protein OS=Mus musculus GN=Cacybp PE=1 SV=1                                | Q9CXW3           | Cacybp       | 27 kDa  | 0            | 0           | 0            | 6.1249      | 4.7269       | FALSE     |
| Calpain small subunit 1 OS=Mus musculus GN=Capns1 PE=1 SV=1                                  | O88456           | Capns1       | 28 kDa  | 0            | 0           | 0            | 2.45        | 3.008        | FALSE     |
| Calpain-1 catalytic subunit OS=Mus musculus GN=Capn1 PE=1 SV=1                               | O35350 (+4)      | Capn1        | 82 kDa  | 0            | 0           | 0            | 4.4916      | 6.0161       | FALSE     |
| Calpain-2 catalytic subunit OS=Mus musculus GN=Capn2 PE=1 SV=4                               | O08529           | Capn2        | 80 kDa  | 3.6831       | 3.1957      | 3.5789       | 7.7582      | 5.5863       | FALSE     |
| Calpastatin OS=Mus musculus GN=Cast PE=1 SV=1                                                | Q8CE80           | Cast         | 81 kDa  | 0            | 0           | 0            | 5.7166      | 4.7269       | FALSE     |
| Calponin OS=Mus musculus GN=Cnn1 PE=2 SV=1                                                   | B2RSH3 (+1)      | Cnn1         | 33 kDa  | 0            | 0           | 0            | 2.45        | 0            | FALSE     |
| Calponin-2 OS=Mus musculus GN=Cnn2 PE=1 SV=1                                                 | Q08093 (+1)      | Cnn2         | 33 kDa  | 0            | 6.3914      | 0            | 12.25       | 9.0241       | FALSE     |
| Calponin-3 OS=Mus musculus GN=Cnn3 PE=1 SV=1                                                 | Q9DAW9           | Cnn3         | 36 kDa  | 3.6831       | 0           | 3.5789       | 7.7582      | 6.4458       | FALSE     |
| Calreticulin OS=Mus musculus GN=Calr PE=1 SV=1                                               | B2MWM9 (+1)      | Calr         | 48 kDa  | 9.2077       | 6.3914      | 8.9474       | 17.15       | 17.618       | FALSE     |
| Calumenin OS=Mus musculus GN=Calu PE=1 SV=1                                                  | O35887 (+1)      | Calu         | 37 kDa  | 5.5246       | 6.3914      | 7.1579       | 13.475      | 10.313       | FALSE     |
| Calumenin OS=Mus musculus GN=Calu PE=1 SV=1                                                  | Q6XLQ8           | Calu         | 37 kDa  | 0            | 0           | 0            | 11.841      | 9.0241       | FALSE     |
| cAMP-dependent protein kinase catalytic subunit beta OS=Mus musculus GN=Prkacb PE=1 SV=2     | P68181           | Prkacb       | 41 kDa  | 0            | 0           | 0            | 2.45        | 2.5783       | FALSE     |
| cAMP-dependent protein kinase type II-beta regulatory subunit OS=Mus musculus GN=Prkar2b     | P31324           | Prkar2b      | 46 kDa  | 0            | 0           | 0            | 3.6749      | 4.2972       | FALSE     |
| CAP-Gly domain-containing linker protein 1 OS=Mus musculus GN=Clip1 PE=1 SV=1                | D3Z2Z1 (+2)      | Clip1        | 160 kDa | 0            | 0           | 0            | 1.6333      | 2.1486       | FALSE     |
| CAP-Gly domain-containing linker protein 2 OS=Mus musculus GN=Clip2 PE=1 SV=2                | Q9Z0H8           | Clip2        | 116 kDa | 0            | 0           | 0            | 0.81665     | 2.5783       | FALSE     |
| Cap-specific mRNA (nucleoside-2'-O-)-methyltransferase 1 OS=Mus musculus GN=Cmtr1 PE=1 SV=1  | Q9DBC3           | Cmtr1        | 96 kDa  | 0            | 0           | 0            | 6.1249      | 4.2972       | FALSE     |
| Capping protein (Actin filament), gelsolin-like OS=Mus musculus GN=Capg PE=1 SV=1            | Q99LB4           | Capg         | 39 kDa  | 0            | 0           | 0            | 4.8999      | 5.1566       | FALSE     |
| Carbonic anhydrase 13 OS=Mus musculus GN=Ca13 PE=1 SV=1                                      | Q9D6N1           | Ca13         | 30 kDa  | 0            | 0           | 0            | 1.6333      | 1.7189       | FALSE     |
| Carbonyl reductase [NADPH] 2 OS=Mus musculus GN=Cbr2 PE=1 SV=1                               | P08074 (+1)      | Cbr2         | 26 kDa  | 0            | 0           | 0            | 2.45        | 0            | FALSE     |
| Carbonyl reductase 1 OS=Mus musculus GN=Cbr1 PE=1 SV=1                                       | B2RXY7 (+1)      | Cbr1         | 31 kDa  | 0            | 0           | 0            | 1.225       | 0            | FALSE     |
| Carboxypeptidase Q OS=Mus musculus GN=Cpq PE=1 SV=1                                          | Q9WVJ3           | Cpq          | 52 kDa  | 0            | 0           | 0            | 0.81665     | 0.85944      | FALSE     |
| Carnitine O-palmitoyltransferase 2, mitochondrial OS=Mus musculus GN=Cpt2 PE=1 SV=2          | P52825 (+1)      | Cpt2         | 74 kDa  | 0            | 0           | 0            | 1.6333      | 1.7189       | FALSE     |
| Casein kinase I isoform alpha OS=Mus musculus GN=Csnk1a1 PE=1 SV=1                           | E9PWB2 (+2)      | Csnk1a1      | 43 kDa  | 0            | 0           | 0            | 2.45        | 1.7189       | FALSE     |
| Casein kinase II subunit alpha' OS=Mus musculus GN=Csnk2a2 PE=1 SV=1                         | O54833 (+1)      | Csnk2a2      | 41 kDa  | 0            | 0           | 0            | 1.6333      | 2.1486       | FALSE     |
| Casein kinase II subunit beta OS=Mus musculus GN=Csnk2b PE=2 SV=1                            | N0E4C0 (+1)      | Csnk2b       | 25 kDa  | 0            | 0           | 0            | 0           | 1.2892       | FALSE     |
| Cask protein OS=Mus musculus GN=Cask PE=2 SV=1                                               | B7ZP42 (+2)      | Cask         | 104 kDa | 0            | 0           | 0            | 1.225       | 0            | FALSE     |
| Caspase 6 OS=Mus musculus GN=Casp6 PE=2 SV=1                                                 | Q99M47           | Casp6        | 32 kDa  | 0            | 0           | 0            | 2.45        | 3.8675       | FALSE     |
| Caspase-2 OS=Mus musculus GN=Casp2 PE=1 SV=1                                                 | D6RFN6 (+1)      | Casp2        | 38 kDa  | 0            | 0           | 0            | 0.81665     | 0            | FALSE     |
| Caspase-3 OS=Mus musculus GN=Casp3 PE=1 SV=1                                                 | P70677           | Casp3        | 31 kDa  | 0            | 0           | 0            | 3.6749      | 4.2972       | FALSE     |
| Catalase OS=Mus musculus GN=Cat PE=1 SV=4                                                    | P24270 (+1)      | Cat          | 60 kDa  | 0            | 0           | 0            | 5.3082      | 4.2972       | FALSE     |
| Catechol O-methyltransferase OS=Mus musculus GN=Comt PE=1 SV=2                               | O88587           | Comt         | 29 kDa  | 0            | 0           | 0            | 1.6333      | 0.85944      | FALSE     |

| Identified Proteins (2666)                                                                    | Accession Number  | Alternate ID | MW      | VPSko-biotin | ctrl-biotin | VPSoe-biotin | ctrl lysate | VPSoe lysate | enriched? |
|-----------------------------------------------------------------------------------------------|-------------------|--------------|---------|--------------|-------------|--------------|-------------|--------------|-----------|
| Cathepsin B OS=Mus musculus GN=Ctsb PE=1 SV=2                                                 | P10605 (+2)       | Ctsb         | 37 kDa  | 3.6831       | 0           | 0            | 7.7582      | 10.743       | FALSE     |
| Cathepsin D OS=Mus musculus GN=Ctsd PE=1 SV=2                                                 | F8WIR1 (+8)       | Ctsd         | 44 kDa  | 0            | 0           | 0            | 2.8583      | 1.7189       | FALSE     |
| Cathepsin L1 OS=Mus musculus GN=Ctsl PE=1 SV=2                                                | P06797 (+2)       | Ctsl         | 38 kDa  | 0            | 0           | 0            | 2.8583      | 3.008        | FALSE     |
| Cathepsin Z, isoform CRA_b OS=Mus musculus GN=Ctsz PE=1 SV=1                                  | Q54516 (+2)       | Ctsz         | 34 kDa  | 0            | 0           | 0            | 3.2666      | 2.5783       | FALSE     |
| Cation-dependent mannose-6-phosphate receptor OS=Mus musculus GN=M6pr PE=1 SV=1               | P24668 (+2)       | M6pr         | 31 kDa  | 0            | 0           | 0            | 1.225       | 0.85944      | FALSE     |
| Caveolae-associated protein 2 OS=Mus musculus GN=Cavin2 PE=1 SV=3                             | Q63918            | Cavin2       | 47 kDa  | 0            | 0           | 0            | 0.81665     | 0            | FALSE     |
| CBP-interacting protein 3 OS=Mus musculus GN=Exosc8 PE=1 SV=1                                 | Q546F8 (+3)       | Exosc8       | 30 kDa  | 0            | 0           | 0            | 0           | 0.85944      | FALSE     |
| CCA tRNA nucleotidyltransferase 1, mitochondrial OS=Mus musculus GN=Trnt1 PE=1 SV=1           | Q8K1J6            | Trnt1        | 50 kDa  | 0            | 0           | 0            | 2.45        | 4.2972       | FALSE     |
| Ccdc102a protein (Fragment) OS=Mus musculus GN=Ccdc102a PE=2 SV=1                             | A4FUJ5 (+2)       | Ccdc102a     | 53 kDa  | 0            | 0           | 0            | 0.81665     | 0.85944      | FALSE     |
| CCR4-NOT transcription complex subunit 1 OS=Mus musculus GN=Cnot1 PE=1 SV=2                   | Q6ZQ08            | Cnot1        | 267 kDa | 0            | 0           | 0            | 3.6749      | 3.8675       | FALSE     |
| CD2-associated protein OS=Mus musculus GN=Cd2ap PE=1 SV=3                                     | Q9JLQ0            | Cd2ap        | 70 kDa  | 0            | 0           | 0            | 1.225       | 1.2892       | FALSE     |
| CD81 antigen OS=Mus musculus GN=Cd81 PE=1 SV=2                                                | P35762 (+1)       | Cd81         | 26 kDa  | 0            | 0           | 0            | 1.6333      | 3.008        | FALSE     |
| CD9 antigen OS=Mus musculus GN=Cd9 PE=1 SV=2                                                  | P40240            | Cd9          | 25 kDa  | 0            | 0           | 0            | 2.45        | 1.7189       | FALSE     |
| CDC16 cell division cycle 16 homolog (S. cerevisiae), isoform CRA_e OS=Mus musculus GN=Cdc16  | Q3T184 (+1)       | Cdc16        | 71 kDa  | 0            | 0           | 0            | 1.225       | 1.2892       | FALSE     |
| Cdc42 effector protein 3 OS=Mus musculus GN=Cdc42ep3 PE=1 SV=1                                | Q9CQC5            | Cdc42ep3     | 28 kDa  | 0            | 0           | 0            | 0.81665     | 0.85944      | FALSE     |
| Cdc42-interacting protein 4 OS=Mus musculus GN=Trip10 PE=1 SV=2                               | Q8CJ53            | Trip10       | 68 kDa  | 0            | 0           | 0            | 1.6333      | 1.2892       | FALSE     |
| CDKN2A-interacting protein OS=Mus musculus GN=Cdkn2aip PE=1 SV=1                              | Q8BI72            | Cdkn2aip     | 60 kDa  | 0            | 0           | 0            | 1.225       | 1.2892       | FALSE     |
| CDW13/WDR61 OS=Mus musculus GN=Wdr61 PE=1 SV=1                                                | A0MNP4 (+1)       | Wdr61        | 34 kDa  | 0            | 0           | 0            | 0           | 2.1486       | FALSE     |
| Cell cycle and apoptosis regulator protein 2 OS=Mus musculus GN=Ccar2 PE=1 SV=2               | Q8VDP4            | Ccar2        | 103 kDa | 0            | 0           | 0            | 1.225       | 3.008        | FALSE     |
| Cell division control protein 42 homolog OS=Mus musculus GN=Cdc42 PE=1 SV=2                   | P60766            | Cdc42        | 21 kDa  | 0            | 0           | 0            | 3.2666      | 3.8675       | FALSE     |
| Cellular nucleic acid-binding protein OS=Mus musculus GN=Cnbp PE=1 SV=2                       | P53996 (+2)       | Cnbp         | 20 kDa  | 0            | 0           | 0            | 3.2666      | 3.8675       | FALSE     |
| Cellular retinoic acid-binding protein 1 OS=Mus musculus GN=Crabp1 PE=1 SV=2                  | P62965            | Crabp1       | 16 kDa  | 0            | 0           | 0            | 4.4916      | 5.1566       | FALSE     |
| Cellular retinoic acid-binding protein 2 OS=Mus musculus GN=Crabp2 PE=2 SV=2                  | P22935            | Crabp2       | 16 kDa  | 0            | 0           | 0            | 1.225       | 1.2892       | FALSE     |
| Cellular tumor antigen p53 OS=Mus musculus GN=Trp53 PE=3 SV=1                                 | A0A158SIS7 (+6)   | Trp53        | 43 kDa  | 0            | 0           | 0            | 4.0833      | 4.2972       | FALSE     |
| Centrosomal protein of 170 kDa OS=Mus musculus GN=Cep170 PE=1 SV=1                            | H7BX26 (+1)       | Cep170       | 174 kDa | 0            | 0           | 0            | 2.0416      | 2.5783       | FALSE     |
| Ceramide synthase 6 OS=Mus musculus GN=Cers6 PE=1 SV=1                                        | Q8C172            | Cers6        | 45 kDa  | 0            | 0           | 0            | 0.81665     | 0            | FALSE     |
| cGMP-dependent protein kinase 1 OS=Mus musculus GN=Prkg1 PE=1 SV=1                            | P0C605 (+1)       | Prkg1        | 76 kDa  | 0            | 0           | 0            | 0.81665     | 0            | FALSE     |
| Chloride channel CLIC-like 1, isoform CRA_a OS=Mus musculus GN=Clcc1 PE=1 SV=1                | A2AEM2 (+1)       | Clcc1        | 61 kDa  | 0            | 0           | 0            | 2.0416      | 1.7189       | FALSE     |
| Chloride channel protein OS=Mus musculus GN=Clcn5 PE=2 SV=1                                   | Q3UL16 (+1)       | Clcn5        | 83 kDa  | 0            | 0           | 0            | 0           | 1.2892       | FALSE     |
| Chloride intracellular channel protein OS=Mus musculus GN=Clic1 PE=1 SV=1                     | Q542F1 (+1)       | Clic1        | 27 kDa  | 0            | 0           | 0            | 5.3082      | 5.1566       | FALSE     |
| Chloride intracellular channel protein OS=Mus musculus GN=Clic4 PE=1 SV=1                     | Q543N5 (+1)       | Clic4        | 29 kDa  | 0            | 0           | 0            | 4.4916      | 4.7269       | FALSE     |
| Choline transporter-like protein 1 OS=Mus musculus GN=Slc44a1 PE=1 SV=3                       | Q6X893            | Slc44a1      | 73 kDa  | 0            | 0           | 0            | 0.81665     | 0.85944      | FALSE     |
| Choline-phosphate cytidyltransferase A OS=Mus musculus GN=Pcyt1a PE=1 SV=1                    | P49586            | Pcyt1a       | 42 kDa  | 0            | 0           | 0            | 1.225       | 1.2892       | FALSE     |
| Chromatin assembly factor 1 subunit A OS=Mus musculus GN=Chaf1a PE=1 SV=1                     | Q9QWF0            | Chaf1a       | 102 kDa | 0            | 0           | 0            | 0.81665     | 1.7189       | FALSE     |
| Chromobox protein homolog 3 OS=Mus musculus GN=Cbx3 PE=1 SV=2                                 | P23198 (+1)       | Cbx3         | 21 kDa  | 0            | 0           | 0            | 2.45        | 3.4377       | FALSE     |
| Chromodomain-helicase-DNA-binding protein 8 OS=Mus musculus GN=Chd8 PE=1 SV=1                 | Q09XV5            | Chd8         | 291 kDa | 0            | 0           | 0            | 0           | 1.7189       | FALSE     |
| Chromosome-associated kinesin KIF4 OS=Mus musculus GN=Kif4 PE=1 SV=3                          | P33174            | Kif4         | 140 kDa | 0            | 0           | 0            | 1.6333      | 2.5783       | FALSE     |
| Citramalyl-CoA lyase, mitochondrial OS=Mus musculus GN=Clybl PE=1 SV=2                        | Q8R4N0            | Clybl        | 38 kDa  | 0            | 0           | 0            | 0           | 1.2892       | FALSE     |
| Clathrin light chain OS=Mus musculus GN=Clta PE=1 SV=1                                        | B1AWD9            | Clta         | 27 kDa  | 0            | 0           | 0            | 0           | 0.85944      | FALSE     |
| Cleavage and polyadenylation specificity factor subunit 5 OS=Mus musculus GN=Nudt21 PE=1 SV=1 | Q9CQF3 (+1)       | Nudt21       | 26 kDa  | 0            | 0           | 0            | 0.81665     | 0.85944      | FALSE     |
| Cleavage and polyadenylation specificity factor subunit 7 OS=Mus musculus GN=Cpsf7 PE=1 SV=1  | Q8BTV2            | Cpsf7        | 52 kDa  | 0            | 0           | 0            | 0.81665     | 0            | FALSE     |
| Cleavage and polyadenylation-specificity factor subunit 6 OS=Mus musculus GN=Cpsf6 PE=1 SV=1  | H3BJ30 (+2)       | Cpsf6        | 59 kDa  | 0            | 0           | 0            | 0.81665     | 2.1486       | FALSE     |
| Cleavage stimulation factor subunit 1 OS=Mus musculus GN=Cstf1 PE=1 SV=1                      | Q99LC2            | Cstf1        | 48 kDa  | 0            | 0           | 0            | 1.6333      | 1.2892       | FALSE     |
| Cleft lip and palate transmembrane protein 1 homolog OS=Mus musculus GN=Ciptm1 PE=1 SV=1      | Q8VBZ3            | Ciptm1       | 75 kDa  | 0            | 0           | 0            | 3.2666      | 3.008        | FALSE     |
| CLIP-associating protein 1 OS=Mus musculus GN=Clasp1 PE=1 SV=2                                | A0A087WNNW8 (+13) | Clasp1       | 163 kDa | 0            | 0           | 0            | 4.8999      | 2.5783       | FALSE     |
| CLIP-associating protein 2 OS=Mus musculus GN=Clasp2 PE=1 SV=1                                | E9Q8N5 (+3)       | Clasp2       | 141 kDa | 0            | 0           | 0            | 2.8583      | 1.7189       | FALSE     |
| Clustered mitochondria protein homolog OS=Mus musculus GN=Cluh PE=1 SV=1                      | A0A0R4J140        | Cluh         | 152 kDa | 0            | 0           | 0            | 2.8583      | 3.8675       | FALSE     |
| CMP-sialic acid transporter OS=Mus musculus GN=Slc35a1 PE=1 SV=2                              | Q61420            | Slc35a1      | 36 kDa  | 0            | 0           | 0            | 0.81665     | 0            | FALSE     |
| Coatmer subunit alpha OS=Mus musculus GN=Copa PE=1 SV=2                                       | Q8CIE6            | Copa         | 138 kDa | 3.6831       | 0           | 0            | 16.741      | 13.321       | FALSE     |
| Coatmer subunit beta OS=Mus musculus GN=Copb1 PE=1 SV=1                                       | Q9JIF7            | Copb1        | 107 kDa | 0            | 0           | 0            | 5.3082      | 5.1566       | FALSE     |
| Coatmer subunit beta' OS=Mus musculus GN=Copb2 PE=1 SV=2                                      | O55029            | Copb2        | 102 kDa | 0            | 4.7936      | 3.5789       | 8.5749      | 10.313       | FALSE     |

| Identified Proteins (2666)                                                                     | Accession Number | Alternate ID | MW      | VPSko-biotin | ctrl-biotin | VPSoe-biotin | ctrl lysate | VPSoe lysate | enriched? |
|------------------------------------------------------------------------------------------------|------------------|--------------|---------|--------------|-------------|--------------|-------------|--------------|-----------|
| Coatomer subunit delta OS=Mus musculus GN=Arcn1 PE=1 SV=2                                      | Q5XJY5           | Arcn1        | 57 kDa  | 0            | 0           | 0            | 6.9416      | 6.4458       | FALSE     |
| Coatomer subunit epsilon OS=Mus musculus GN=Cope PE=1 SV=3                                     | Q89079 (+1)      | Cope         | 35 kDa  | 0            | 0           | 0            | 1.6333      | 1.2892       | FALSE     |
| Coatomer subunit gamma-1 OS=Mus musculus GN=Copg1 PE=1 SV=1                                    | Q9QZE5           | Copg1        | 98 kDa  | 0            | 0           | 3.5789       | 7.3499      | 4.7269       | FALSE     |
| Coatomer subunit gamma-2 OS=Mus musculus GN=Copg2 PE=1 SV=1                                    | Q9QXK3           | Copg2        | 98 kDa  | 0            | 0           | 0            | 1.6333      | 0            | FALSE     |
| Cofilin-1 OS=Mus musculus GN=Cfl1 PE=1 SV=1                                                    | F8WGL3 (+2)      | Cfl1         | 25 kDa  | 0            | 4.7936      | 0            | 9.3915      | 7.7349       | FALSE     |
| Cofilin-2 OS=Mus musculus GN=Cfl2 PE=1 SV=1                                                    | P45591 (+1)      | Cfl2         | 19 kDa  | 0            | 0           | 0            | 1.6333      | 1.7189       | FALSE     |
| Coiled-coil domain containing 25 OS=Mus musculus GN=Ccdc25 PE=1 SV=1                           | A0PK78 (+1)      | Ccdc25       | 24 kDa  | 0            | 0           | 0            | 1.225       | 0.85944      | FALSE     |
| Coiled-coil domain containing 47 OS=Mus musculus GN=Ccdc47 PE=2 SV=1                           | Q0VBU4 (+1)      | Ccdc47       | 56 kDa  | 0            | 0           | 0            | 2.8583      | 2.5783       | FALSE     |
| Coiled-coil-helix-coiled-coil-helix domain-containing protein 2 OS=Mus musculus GN=Chchd2 PE=2 | Q9D1L0           | Chchd2       | 16 kDa  | 0            | 0           | 0            | 0.81665     | 1.2892       | FALSE     |
| Col3a1 protein (Fragment) OS=Mus musculus GN=Col3a1 PE=2 SV=1                                  | Q8K173           | Col3a1       | 115 kDa | 0            | 0           | 0            | 2.45        | 1.7189       | FALSE     |
| Collagen alpha-1(XII) chain OS=Mus musculus GN=Col12a1 PE=2 SV=3                               | Q60847           | Col12a1      | 340 kDa | 0            | 0           | 0            | 2.45        | 0            | FALSE     |
| Collagen alpha-2(I) chain OS=Mus musculus GN=Col1a2 PE=1 SV=2                                  | Q01149 (+1)      | Col1a2       | 130 kDa | 0            | 0           | 0            | 3.2666      | 0            | FALSE     |
| Collagen alpha-2(VI) chain OS=Mus musculus GN=Col6a2 PE=1 SV=3                                 | Q02788           | Col6a2       | 110 kDa | 0            | 0           | 0            | 0.81665     | 0            | FALSE     |
| Collagen triple helix repeat containing 1 OS=Mus musculus GN=Cthrc1 PE=2 SV=1                  | A2RRY6 (+1)      | Cthrc1       | 26 kDa  | 0            | 0           | 0            | 0.81665     | 0            | FALSE     |
| Collagen type IV alpha-3-binding protein OS=Mus musculus GN=Col4a3bp PE=1 SV=1                 | Q9EQG9           | Col4a3bp     | 71 kDa  | 0            | 0           | 0            | 0.81665     | 2.5783       | FALSE     |
| Collectin-12 OS=Mus musculus GN=Colec12 PE=1 SV=1                                              | Q8K4Q8           | Colec12      | 81 kDa  | 0            | 0           | 0            | 0.81665     | 0            | FALSE     |
| Complex I intermediate-associated protein 30, mitochondrial OS=Mus musculus GN=Ndufaf1 PE=     | A0A0R4J081 (+2)  | Ndufaf1      | 38 kDa  | 0            | 0           | 0            | 1.225       | 1.2892       | FALSE     |
| Condensin complex subunit 1 OS=Mus musculus GN=Ncapd2 PE=1 SV=1                                | A0A0R4J0H7       | Ncapd2       | 156 kDa | 0            | 0           | 0            | 4.4916      | 3.8675       | FALSE     |
| Condensin complex subunit 2 OS=Mus musculus GN=Ncaph PE=1 SV=1                                 | Q8C156           | Ncaph        | 82 kDa  | 0            | 0           | 0            | 4.4916      | 4.2972       | FALSE     |
| Conserved oligomeric Golgi complex subunit 3 OS=Mus musculus GN=Cog3 PE=1 SV=3                 | Q8CI04           | Cog3         | 93 kDa  | 0            | 0           | 0            | 0.81665     | 0            | FALSE     |
| COP9 signalosome complex subunit 1 OS=Mus musculus GN=Gps1 PE=1 SV=1                           | G3UXW9           | Gps1         | 59 kDa  | 0            | 0           | 0            | 2.0416      | 2.1486       | FALSE     |
| COP9 signalosome complex subunit 2 OS=Mus musculus GN=Cops2 PE=1 SV=1                          | P61202 (+1)      | Cops2        | 52 kDa  | 0            | 0           | 0            | 4.4916      | 4.2972       | FALSE     |
| COP9 signalosome complex subunit 3 OS=Mus musculus GN=Cops3 PE=1 SV=3                          | O88543 (+1)      | Cops3        | 48 kDa  | 0            | 0           | 0            | 4.0833      | 3.008        | FALSE     |
| COP9 signalosome complex subunit 4 OS=Mus musculus GN=Cops4 PE=1 SV=1                          | O88544 (+1)      | Cops4        | 46 kDa  | 0            | 0           | 0            | 2.8583      | 1.2892       | FALSE     |
| COP9 signalosome complex subunit 6 OS=Mus musculus GN=Cops6 PE=1 SV=1                          | O88545 (+1)      | Cops6        | 36 kDa  | 0            | 0           | 0            | 2.0416      | 3.008        | FALSE     |
| COP9 signalosome complex subunit 7a OS=Mus musculus GN=Cops7a PE=1 SV=2                        | Q9CZ04           | Cops7a       | 30 kDa  | 0            | 0           | 0            | 0.81665     | 0            | FALSE     |
| COP9 signalosome complex subunit 8 OS=Mus musculus GN=Cops8 PE=1 SV=1                          | Q8VBV7           | Cops8        | 23 kDa  | 0            | 0           | 0            | 0.81665     | 0.85944      | FALSE     |
| Copine-1 OS=Mus musculus GN=Cpne1 PE=1 SV=1                                                    | Q8C166           | Cpne1        | 59 kDa  | 0            | 0           | 0            | 2.8583      | 2.1486       | FALSE     |
| Copine-2 OS=Mus musculus GN=Cpne2 PE=1 SV=1                                                    | A0A0R4J1D0 (+1)  | Cpne2        | 61 kDa  | 0            | 0           | 0            | 1.6333      | 1.2892       | FALSE     |
| Copine-3 OS=Mus musculus GN=Cpne3 PE=1 SV=2                                                    | Q8BT60           | Cpne3        | 60 kDa  | 0            | 0           | 0            | 2.0416      | 3.008        | FALSE     |
| Copper transport protein ATOX1 OS=Mus musculus GN=Atox1 PE=1 SV=1                              | O08997           | Atox1        | 7 kDa   | 0            | 0           | 0            | 0.81665     | 0            | FALSE     |
| Cordon-bleu protein-like 1 OS=Mus musculus GN=Cobll1 PE=1 SV=2                                 | Q3UMF0           | Cobll1       | 137 kDa | 0            | 0           | 0            | 2.0416      | 4.2972       | FALSE     |
| Coronin OS=Mus musculus GN=Coro1b PE=1 SV=1                                                    | A2RS22 (+1)      | Coro1b       | 54 kDa  | 0            | 0           | 0            | 2.45        | 3.008        | FALSE     |
| Coronin OS=Mus musculus GN=Coro1c PE=1 SV=1                                                    | Q499X7 (+2)      | Coro1c       | 53 kDa  | 0            | 0           | 0            | 3.2666      | 2.5783       | FALSE     |
| Cotl1 protein OS=Mus musculus GN=Cotl1 PE=1 SV=1                                               | Q544F6 (+1)      | Cotl1        | 16 kDa  | 0            | 0           | 0            | 2.45        | 1.7189       | FALSE     |
| Craniofacial development protein 1 OS=Mus musculus GN=Cfdp1 PE=1 SV=1                          | O88271           | Cfdp1        | 33 kDa  | 0            | 0           | 0            | 1.225       | 2.1486       | FALSE     |
| Crip2 protein OS=Mus musculus GN=Crip2 PE=1 SV=1                                               | Q4FJU3 (+1)      | Crip2        | 23 kDa  | 0            | 0           | 0            | 0           | 0.85944      | FALSE     |
| CTF18, chromosome transmission fidelity factor 18 homolog (S. cerevisiae), isoform CRA_a OS=M  | A0A0R4J0I4 (+1)  | Chtf18       | 108 kDa | 0            | 0           | 0            | 0.81665     | 0            | FALSE     |
| CTP synthase 2 OS=Mus musculus GN=Ctps2 PE=1 SV=1                                              | P70303           | Ctps2        | 66 kDa  | 0            | 0           | 0            | 2.45        | 4.7269       | FALSE     |
| CTTNBP2 N-terminal-like protein OS=Mus musculus GN=Cttnbp2nl PE=1 SV=1                         | Q99LJ0           | Cttnbp2nl    | 70 kDa  | 0            | 0           | 0            | 1.225       | 1.2892       | FALSE     |
| CUGBP Elav-like family member 1 OS=Mus musculus GN=Celf1 PE=1 SV=2                             | P28659           | Celf1        | 52 kDa  | 0            | 0           | 0            | 2.8583      | 1.2892       | FALSE     |
| Cullin 7 OS=Mus musculus GN=Cul7 PE=2 SV=1                                                     | A9C491 (+1)      | Cul7         | 192 kDa | 0            | 0           | 0            | 1.6333      | 0            | FALSE     |
| Cullin-1 OS=Mus musculus GN=Cul1 PE=1 SV=1                                                     | Q9WTX6           | Cul1         | 90 kDa  | 0            | 0           | 0            | 3.2666      | 2.5783       | FALSE     |
| Cullin-4B OS=Mus musculus GN=Cul4b PE=1 SV=1                                                   | A2A432 (+1)      | Cul4b        | 111 kDa | 0            | 0           | 0            | 3.2666      | 3.4377       | FALSE     |
| Cullin-5 OS=Mus musculus GN=Cul5 PE=1 SV=1                                                     | E9PV12 (+3)      | Cul5         | 96 kDa  | 0            | 0           | 0            | 1.6333      | 1.7189       | FALSE     |
| Cyclin-dependent kinase 2 OS=Mus musculus GN=Cdk2 PE=1 SV=2                                    | P97377 (+2)      | Cdk2         | 39 kDa  | 0            | 0           | 0            | 2.0416      | 3.4377       | FALSE     |
| Cyclin-dependent kinase 6 OS=Mus musculus GN=Cdk6 PE=1 SV=1                                    | Q0VBK8 (+2)      | Cdk6         | 37 kDa  | 0            | 0           | 0            | 0           | 1.2892       | FALSE     |
| Cyclin-dependent kinase 9 OS=Mus musculus GN=Cdk9 PE=1 SV=1                                    | Q99J95           | Cdk9         | 43 kDa  | 0            | 0           | 0            | 0           | 1.7189       | FALSE     |
| Cyclin-dependent kinase inhibitor 2A OS=Mus musculus GN=Cdkn2a PE=1 SV=2                       | P51480           | Cdkn2a       | 18 kDa  | 0            | 0           | 0            | 1.225       | 0            | FALSE     |
| Cyclin-dependent-like kinase 5 OS=Mus musculus GN=Cdk5 PE=1 SV=1                               | P49615 (+1)      | Cdk5         | 33 kDa  | 0            | 0           | 0            | 2.0416      | 1.2892       | FALSE     |
| Cyclin-G-associated kinase OS=Mus musculus GN=Gak PE=1 SV=1                                    | A0A0R4J0F6 (+2)  | Gak          | 144 kDa | 0            | 0           | 0            | 0.81665     | 0.85944      | FALSE     |

| Identified Proteins (2666)                                                                   | Accession Number | Alternate ID | MW      | VPSko-biotin | ctrl-biotin | VPSoe-biotin | ctrl lysate | VPSoe lysate | enriched? |
|----------------------------------------------------------------------------------------------|------------------|--------------|---------|--------------|-------------|--------------|-------------|--------------|-----------|
| Cystatin-C OS=Mus musculus GN=Cst3 PE=1 SV=2                                                 | P21460 (+2)      | Cst3         | 16 kDa  | 0            | 0           | 0            | 0.81665     | 0            | FALSE     |
| Cysteine and glycine-rich protein 1 OS=Mus musculus GN=Csrp1 PE=1 SV=3                       | P97315 (+1)      | Csrp1        | 21 kDa  | 0            | 0           | 0            | 5.3082      | 4.7269       | FALSE     |
| Cysteine and histidine-rich domain-containing protein 1 OS=Mus musculus GN=Chordc1 PE=1 SV=1 | Q9D1P4           | Chordc1      | 37 kDa  | 0            | 0           | 0            | 3.2666      | 2.5783       | FALSE     |
| Cysteine desulfurase, mitochondrial OS=Mus musculus GN=Nfs1 PE=1 SV=3                        | Q9Z1J3           | Nfs1         | 51 kDa  | 0            | 0           | 0            | 1.225       | 0.85944      | FALSE     |
| Cysteine protease OS=Mus musculus GN=Atg4b PE=1 SV=1                                         | A0A0R4J065       | Atg4b        | 44 kDa  | 0            | 0           | 0            | 0.81665     | 0.85944      | FALSE     |
| Cysteine-rich with EGF-like domain protein 2 OS=Mus musculus GN=Crelid2 PE=1 SV=1            | Q9CYA0           | Crelid2      | 38 kDa  | 0            | 0           | 0            | 4.4916      | 4.2972       | FALSE     |
| Cytidine deaminase OS=Mus musculus GN=Cda PE=1 SV=2                                          | P56389           | Cda          | 16 kDa  | 0            | 0           | 0            | 0           | 1.2892       | FALSE     |
| Cytochrome b-5, isoform CRA_a OS=Mus musculus GN=Cyb5a PE=1 SV=1                             | G5E850 (+2)      | Cyb5a        | 11 kDa  | 0            | 0           | 0            | 2.0416      | 2.1486       | FALSE     |
| Cytochrome b-c1 complex subunit Rieske, mitochondrial OS=Mus musculus GN=Uqcrf5 PE=1 SV=1    | Q9CR68           | Uqcrf5       | 29 kDa  | 0            | 0           | 0            | 0           | 0.85944      | FALSE     |
| Cytochrome b5 type B OS=Mus musculus GN=Cyb5b PE=1 SV=1                                      | Q9CQX2           | Cyb5b        | 16 kDa  | 0            | 0           | 0            | 2.0416      | 0            | FALSE     |
| Cytochrome c oxidase subunit 2 OS=Mus musculus GN=COX2 PE=3 SV=1                             | A0A023J6F3 (+9)  | COX2         | 26 kDa  | 0            | 0           | 0            | 3.6749      | 3.008        | FALSE     |
| Cytochrome c oxidase subunit 6B1 OS=Mus musculus GN=Cox6b1 PE=1 SV=2                         | P56391           | Cox6b1       | 10 kDa  | 0            | 0           | 0            | 1.225       | 0            | FALSE     |
| Cytochrome c-type heme lyase OS=Mus musculus GN=Hccs PE=1 SV=2                               | P53702 (+1)      | Hccs         | 31 kDa  | 0            | 0           | 0            | 0           | 0.85944      | FALSE     |
| Cytochrome P450 20A1 OS=Mus musculus GN=Cyp20a1 PE=1 SV=1                                    | Q8BKE6           | Cyp20a1      | 52 kDa  | 0            | 0           | 0            | 2.0416      | 0.85944      | FALSE     |
| Cytoplasmic aconitase OS=Mus musculus GN=aco1 PE=3 SV=1                                      | Q8VDC3           | aco1         | 99 kDa  | 0            | 0           | 0            | 4.8999      | 3.008        | FALSE     |
| Cytoplasmic dynein 1 heavy chain 1 OS=Mus musculus GN=Dync1h1 PE=1 SV=2                      | Q9JHU4           | Dync1h1      | 532 kDa | 11.049       | 14.381      | 17.895       | 28.175      | 34.377       | FALSE     |
| Cytoplasmic dynein 1 intermediate chain 2 OS=Mus musculus GN=Dync1i2 PE=1 SV=1               | A2BFF9 (+4)      | Dync1i2      | 71 kDa  | 0            | 0           | 0            | 2.45        | 2.5783       | FALSE     |
| Cytoplasmic dynein 1 light intermediate chain 2 OS=Mus musculus GN=Dync1li2 PE=1 SV=2        | Q6PDL0           | Dync1li2     | 54 kDa  | 0            | 0           | 0            | 2.45        | 3.8675       | FALSE     |
| Cytoplasmic protein NCK1 OS=Mus musculus GN=Nck1 PE=1 SV=1                                   | Q8BH99 (+1)      | Nck1         | 36 kDa  | 0            | 0           | 0            | 0           | 0.85944      | FALSE     |
| Cytoplasmic tRNA 2-thiolation protein 2 OS=Mus musculus GN=Ctu2 PE=1 SV=1                    | G3UXB4 (+1)      | Ctu2         | 45 kDa  | 0            | 0           | 0            | 0.81665     | 0            | FALSE     |
| Cytoskeletal protein OS=Mus musculus GN=Utrn PE=2 SV=1                                       | O08614           | Utrn         | 393 kDa | 0            | 0           | 0            | 2.0416      | 2.1486       | FALSE     |
| Cytosol aminopeptidase OS=Mus musculus GN=Lap3 PE=1 SV=3                                     | Q9CPY7           | Lap3         | 56 kDa  | 0            | 0           | 0            | 8.9832      | 8.5944       | FALSE     |
| Cytosolic acyl coenzyme A thioester hydrolase OS=Mus musculus GN=Acot7 PE=1 SV=1             | E9PYH2 (+1)      | Acot7        | 43 kDa  | 0            | 0           | 0            | 4.0833      | 4.2972       | FALSE     |
| Cytosolic Fe-S cluster assembly factor NUBP1 OS=Mus musculus GN=Nubp1 PE=1 SV=1              | Q9R060           | Nubp1        | 34 kDa  | 0            | 0           | 0            | 0.81665     | 0.85944      | FALSE     |
| Cytosolic Fe-S cluster assembly factor NUBP2 OS=Mus musculus GN=Nubp2 PE=1 SV=1              | Q9R061           | Nubp2        | 30 kDa  | 0            | 0           | 0            | 0           | 0.85944      | FALSE     |
| Cytosolic non-specific dipeptidase OS=Mus musculus GN=Cndp2 PE=1 SV=1                        | Q9D1A2           | Cndp2        | 53 kDa  | 0            | 0           | 0            | 2.0416      | 2.5783       | FALSE     |
| Cytosolic purine 5'-nucleotidase OS=Mus musculus GN=Nt5c2 PE=1 SV=1                          | E9Q9M1 (+2)      | Nt5c2        | 68 kDa  | 0            | 0           | 0            | 3.2666      | 3.008        | FALSE     |
| D-aminoacyl-tRNA deacylase 1 OS=Mus musculus GN=Dtd1 PE=1 SV=2                               | Q9DD18           | Dtd1         | 23 kDa  | 0            | 0           | 0            | 0.81665     | 0            | FALSE     |
| D-dopachrome decarboxylase OS=Mus musculus GN=Ddt PE=1 SV=3                                  | O35215 (+1)      | Ddt          | 13 kDa  | 0            | 0           | 0            | 2.45        | 2.1486       | FALSE     |
| DAZ associated protein 1, isoform CRA_b OS=Mus musculus GN=Dazap1 PE=1 SV=1                  | Q3UGB5 (+1)      | Dazap1       | 43 kDa  | 0            | 0           | 0            | 0.81665     | 1.2892       | FALSE     |
| DCC-interacting protein 13-alpha OS=Mus musculus GN=App1 PE=1 SV=1                           | Q8K3H0           | App1         | 79 kDa  | 0            | 0           | 0            | 2.45        | 2.5783       | FALSE     |
| DDB1- and CUL4-associated factor 8 OS=Mus musculus GN=Dcaf8 PE=1 SV=1                        | Q8N7N5           | Dcaf8        | 66 kDa  | 0            | 0           | 0            | 1.6333      | 1.2892       | FALSE     |
| Ddx58 protein (Fragment) OS=Mus musculus GN=Ddx58 PE=2 SV=1                                  | A1L0V6 (+2)      | Ddx58        | 106 kDa | 0            | 0           | 0            | 9.7998      | 0.85944      | FALSE     |
| DEAD (Asp-Glu-Ala-Asp) box polypeptide 21 OS=Mus musculus GN=Ddx21 PE=2 SV=1                 | Q6PCP0 (+1)      | Ddx21        | 94 kDa  | 0            | 0           | 0            | 2.45        | 2.1486       | FALSE     |
| DEAD (Asp-Glu-Ala-Asp) box polypeptide 23 OS=Mus musculus GN=Ddx23 PE=1 SV=1                 | D3Z0M9           | Ddx23        | 95 kDa  | 0            | 0           | 0            | 0           | 0.85944      | FALSE     |
| DEAD (Asp-Glu-Ala-Asp) box polypeptide 47 OS=Mus musculus GN=Ddx47 PE=2 SV=1                 | Q4VBG1 (+1)      | Ddx47        | 51 kDa  | 0            | 0           | 0            | 0           | 0.85944      | FALSE     |
| DEAH (Asp-Glu-Ala-His) box polypeptide 38 OS=Mus musculus GN=Dhx38 PE=1 SV=1                 | Q80X98           | Dhx38        | 141 kDa | 0            | 0           | 0            | 0           | 0.85944      | FALSE     |
| Death-associated protein kinase 3 OS=Mus musculus GN=Dapk3 PE=1 SV=1                         | O54784 (+1)      | Dapk3        | 51 kDa  | 0            | 0           | 0            | 0.81665     | 0            | FALSE     |
| Decr1 protein OS=Mus musculus GN=Decr1 PE=1 SV=1                                             | Q4FJK0 (+1)      | Decr1        | 36 kDa  | 0            | 0           | 0            | 0.81665     | 1.2892       | FALSE     |
| Dedicator of cytokinesis protein 11 OS=Mus musculus GN=Dock11 PE=1 SV=1                      | A2AF47           | Dock11       | 238 kDa | 0            | 0           | 0            | 0           | 1.2892       | FALSE     |
| Dedicator of cytokinesis protein 7 OS=Mus musculus GN=Dock7 PE=1 SV=2                        | A2A9M4 (+2)      | Dock7        | 241 kDa | 0            | 0           | 0            | 1.6333      | 3.8675       | FALSE     |
| Dehydrogenase/reductase SDR family member 1 OS=Mus musculus GN=Dhrs1 PE=1 SV=1               | Q99L04           | Dhrs1        | 34 kDa  | 0            | 0           | 0            | 2.45        | 3.008        | FALSE     |
| Delta-1-pyrroline-5-carboxylate synthase OS=Mus musculus GN=Aldh18a1 PE=1 SV=2               | Q9Z110           | Aldh18a1     | 87 kDa  | 0            | 3.1957      | 5.3684       | 8.1665      | 7.3052       | FALSE     |
| Delta-6 desaturase (Fragment) OS=Mus musculus GN=Fads2 PE=2 SV=1                             | F2WWK6 (+1)      | Fads2        | 51 kDa  | 0            | 0           | 0            | 1.6333      | 0            | FALSE     |
| Delta-aminolevulinic acid dehydratase OS=Mus musculus GN=Alad PE=1 SV=1                      | P10518 (+1)      | Alad         | 36 kDa  | 0            | 0           | 0            | 2.45        | 2.1486       | FALSE     |
| Delta(24)-sterol reductase OS=Mus musculus GN=Dhcr24 PE=1 SV=1                               | Q8VCH6           | Dhcr24       | 60 kDa  | 0            | 0           | 0            | 0.81665     | 0            | FALSE     |
| Density-regulated protein OS=Mus musculus GN=Denr PE=1 SV=1                                  | Q9CQJ6           | Denr         | 22 kDa  | 0            | 0           | 0            | 1.6333      | 2.1486       | FALSE     |
| Deoxycytidine kinase OS=Mus musculus GN=Dck PE=1 SV=1                                        | P43346 (+1)      | Dck          | 30 kDa  | 0            | 0           | 0            | 0           | 0.85944      | FALSE     |
| Deoxyhypusine synthase OS=Mus musculus GN=Dhps PE=1 SV=2                                     | Q3TXU5           | Dhps         | 41 kDa  | 0            | 0           | 0            | 0.81665     | 0.85944      | FALSE     |
| Deoxynucleoside triphosphate triphosphohydrolase SAMHD1 OS=Mus musculus GN=Samhd1 PE=1 SV=1  | F8WJEO (+1)      | Samhd1       | 76 kDa  | 0            | 3.1957      | 3.5789       | 4.4916      | 3.8675       | FALSE     |
| Deoxyuridine triphosphatase OS=Mus musculus GN=Dut PE=1 SV=1                                 | Q9CQ43 (+1)      | Dut          | 17 kDa  | 0            | 0           | 0            | 3.2666      | 3.4377       | FALSE     |



| Identified Proteins (2666)                                                                     | Accession Number | Alternate ID | MW      | VPSko-biotin | ctrl-biotin | VPSoe-biotin | ctrl lysate | VPSoe lysate | enriched? |
|------------------------------------------------------------------------------------------------|------------------|--------------|---------|--------------|-------------|--------------|-------------|--------------|-----------|
| Depdc6-001 OS=Mus musculus GN=Deptor PE=4 SV=1                                                 | B2ZRS3 (+1)      | Deptor       | 46 kDa  | 0            | 0           | 0            | 0           | 0.85944      | FALSE     |
| Dephospho-CoA kinase domain-containing protein OS=Mus musculus GN=Dcakd PE=1 SV=1              | Q8BHC4           | Dcakd        | 26 kDa  | 0            | 0           | 0            | 0           | 0.85944      | FALSE     |
| Deubiquitinating protein VCI135 OS=Mus musculus GN=Vcpip1 PE=1 SV=1                            | A0A0R4J0M9 (+1)  | Vcpip1       | 134 kDa | 0            | 0           | 0            | 1.225       | 0            | FALSE     |
| Developmentally-regulated GTP-binding protein 1 OS=Mus musculus GN=Drp1 PE=1 SV=1              | P32233 (+2)      | Drp1         | 41 kDa  | 0            | 0           | 0            | 4.0833      | 5.5863       | FALSE     |
| Developmentally-regulated GTP-binding protein 2 OS=Mus musculus GN=Drp2 PE=1 SV=1              | Q9QXB9           | Drp2         | 41 kDa  | 0            | 0           | 0            | 6.1249      | 6.0161       | FALSE     |
| Dihydrofolate reductase OS=Mus musculus GN=Dhfr PE=1 SV=3                                      | P00375 (+1)      | Dhfr         | 22 kDa  | 0            | 0           | 0            | 1.6333      | 1.7189       | FALSE     |
| Dihydroorotate dehydrogenase (quinone), mitochondrial OS=Mus musculus GN=Dhodh PE=1 SV=1       | O35435           | Dhodh        | 43 kDa  | 0            | 0           | 0            | 0.81665     | 0.85944      | FALSE     |
| Dihydropteridine reductase OS=Mus musculus GN=Qdpr PE=1 SV=2                                   | Q8BV14           | Qdpr         | 26 kDa  | 0            | 0           | 0            | 2.45        | 2.5783       | FALSE     |
| Dihydropyrimidinase-related protein 2 OS=Mus musculus GN=Dpysl2 PE=1 SV=2                      | O08553           | Dpysl2       | 62 kDa  | 7.3662       | 4.7936      | 5.3684       | 14.7        | 17.618       | FALSE     |
| Dihydropyrimidinase-related protein 3 OS=Mus musculus GN=Dpysl3 PE=1 SV=1                      | E9PWE8           | Dpysl3       | 74 kDa  | 0            | 0           | 0            | 8.5749      | 9.0241       | FALSE     |
| Dipeptidyl peptidase 3 OS=Mus musculus GN=Dpp3 PE=2 SV=1                                       | Q3UDD5 (+3)      | Dpp3         | 83 kDa  | 0            | 0           | 0            | 4.4916      | 5.1566       | FALSE     |
| Dipeptidyl peptidase 9 OS=Mus musculus GN=Dpp9 PE=1 SV=2                                       | Q8BVG4           | Dpp9         | 98 kDa  | 0            | 0           | 0            | 0           | 0.85944      | FALSE     |
| Disco-interacting protein 2 homolog B OS=Mus musculus GN=Dip2b PE=1 SV=1                       | Q3UH60           | Dip2b        | 171 kDa | 0            | 0           | 0            | 0.81665     | 0.85944      | FALSE     |
| Dishevelled 2, dsh homolog (Drosophila) OS=Mus musculus GN=Dvl2 PE=2 SV=1                      | I6L9H1 (+1)      | Dvl2         | 79 kDa  | 0            | 0           | 0            | 1.6333      | 1.7189       | FALSE     |
| Disks large homolog 1 OS=Mus musculus GN=Dlg1 PE=1 SV=1                                        | E9Q9H0 (+1)      | Dlg1         | 101 kDa | 0            | 0           | 0            | 1.6333      | 2.1486       | FALSE     |
| Disks large homolog 3 OS=Mus musculus GN=Dlg3 PE=1 SV=1                                        | A2BEE9 (+2)      | Dlg3         | 92 kDa  | 0            | 0           | 0            | 1.6333      | 0            | FALSE     |
| Disks large-associated protein 5 OS=Mus musculus GN=Dlgap5 PE=1 SV=2                           | Q8K4R9           | Dlgap5       | 90 kDa  | 0            | 0           | 0            | 1.225       | 1.2892       | FALSE     |
| DLK1 OS=Mus musculus GN=DLK1 PE=2 SV=1                                                         | B4YB46 (+4)      | DLK1         | 33 kDa  | 0            | 0           | 0            | 0.81665     | 0            | FALSE     |
| DNA (cytosine-5)-methyltransferase OS=Mus musculus GN=Dnmt1 PE=2 SV=1                          | Q7TSJ0           | Dnmt1        | 184 kDa | 0            | 0           | 0            | 3.2666      | 4.2972       | FALSE     |
| DNA damage-binding protein 1 OS=Mus musculus GN=Ddb1 PE=1 SV=2                                 | Q3U1J4           | Ddb1         | 127 kDa | 3.6831       | 0           | 0            | 8.9832      | 12.032       | FALSE     |
| DNA excision repair protein ERCC-6-like OS=Mus musculus GN=Ercc6l PE=1 SV=1                    | Q8BHK9           | Ercc6l       | 139 kDa | 0            | 0           | 0            | 2.45        | 3.4377       | FALSE     |
| DNA helicase OS=Mus musculus GN=Mcm2 PE=2 SV=1                                                 | Q3UK39           | Mcm2         | 102 kDa | 0            | 0           | 0            | 8.1665      | 8.1647       | FALSE     |
| DNA helicase OS=Mus musculus GN=Mcm4 PE=2 SV=1                                                 | Q9D077           | Mcm4         | 97 kDa  | 0            | 0           | 0            | 3.6749      | 3.008        | FALSE     |
| DNA helicase OS=Mus musculus GN=Mcm5 PE=2 SV=1                                                 | Q8BQ03           | Mcm5         | 82 kDa  | 5.5246       | 6.3914      | 5.3684       | 6.9416      | 7.7349       | FALSE     |
| DNA helicase OS=Mus musculus GN=Mcm7 PE=1 SV=1                                                 | Q3U4T8 (+3)      | Mcm7         | 81 kDa  | 0            | 0           | 0            | 7.3499      | 6.8755       | FALSE     |
| DNA ligase 1 OS=Mus musculus GN=Lig1 PE=1 SV=2                                                 | P37913 (+1)      | Lig1         | 102 kDa | 0            | 0           | 0            | 3.2666      | 3.008        | FALSE     |
| DNA mismatch repair protein Msh2 OS=Mus musculus GN=Msh2 PE=1 SV=1                             | P43247 (+2)      | Msh2         | 104 kDa | 0            | 0           | 0            | 4.0833      | 4.7269       | FALSE     |
| DNA mismatch repair protein Msh6 OS=Mus musculus GN=Msh6 PE=1 SV=3                             | P54276 (+1)      | Msh6         | 151 kDa | 0            | 0           | 0            | 4.8999      | 5.5863       | FALSE     |
| DNA polymerase alpha catalytic subunit OS=Mus musculus GN=Pola1 PE=1 SV=2                      | P33609           | Pola1        | 167 kDa | 0            | 0           | 0            | 1.6333      | 1.7189       | FALSE     |
| DNA polymerase alpha subunit B OS=Mus musculus GN=Pola2 PE=1 SV=2                              | P33611           | Pola2        | 66 kDa  | 0            | 0           | 0            | 0.81665     | 2.1486       | FALSE     |
| DNA polymerase OS=Mus musculus GN=Pold1 PE=2 SV=1                                              | Q8C2N0 (+1)      | Pold1        | 124 kDa | 0            | 0           | 0            | 2.45        | 2.1486       | FALSE     |
| DNA primase large subunit OS=Mus musculus GN=Prim2 PE=1 SV=1                                   | P33610 (+1)      | Prim2        | 58 kDa  | 0            | 0           | 0            | 0           | 0.85944      | FALSE     |
| DNA repair protein RAD51 homolog 1 OS=Mus musculus GN=Rad51 PE=1 SV=1                          | Q08297           | Rad51        | 37 kDa  | 0            | 0           | 0            | 1.6333      | 1.2892       | FALSE     |
| DNA repair protein Sfr1 OS=Mus musculus GN=Sfr1 PE=2 SV=1                                      | E3WH30 (+1)      | Sfr1         | 34 kDa  | 0            | 0           | 0            | 0.81665     | 0.85944      | FALSE     |
| DNA replication licensing factor MCM6 OS=Mus musculus GN=Mcm6 PE=1 SV=1                        | P97311 (+1)      | Mcm6         | 93 kDa  | 0            | 0           | 0            | 9.3915      | 8.1647       | FALSE     |
| DNA segment, Chr 15, ERATO Doi 621, expressed, isoform CRA_a OS=Mus musculus GN=Fam91a         | B6YY24 (+1)      | Fam91a1      | 93 kDa  | 0            | 0           | 0            | 2.0416      | 0.85944      | FALSE     |
| DNA segment, Chr 6, Wayne State University 176, expressed, isoform CRA_a OS=Mus musculus       | G3X911 (+2)      | Fam3c        | 21 kDa  | 0            | 0           | 0            | 2.8583      | 2.1486       | FALSE     |
| DNA segment, human DXS9928E OS=Mus musculus GN=Fam50a PE=4 SV=1                                | A0A158SIT3 (+1)  | Fam50a       | 40 kDa  | 0            | 0           | 0            | 1.225       | 0.85944      | FALSE     |
| DNA-(apurinic or apyrimidinic site) lyase OS=Mus musculus GN=Apex1 PE=1 SV=2                   | P28352 (+1)      | Apex1        | 35 kDa  | 0            | 0           | 0            | 5.3082      | 4.7269       | FALSE     |
| DNA-directed RNA polymerase II subunit RPB2 OS=Mus musculus GN=Polr2b PE=1 SV=2                | Q8CF17           | Polr2b       | 134 kDa | 0            | 0           | 0            | 0.81665     | 0            | FALSE     |
| DNA-directed RNA polymerases I, II, and III subunit RPABC3 OS=Mus musculus GN=Polr2h PE=1 SV=1 | Q923G2           | Polr2h       | 17 kDa  | 0            | 0           | 0            | 0.81665     | 0.85944      | FALSE     |
| DnaJ (Hsp40) homolog, subfamily B, member 1 OS=Mus musculus GN=Dnajb1 PE=1 SV=1                | Q3TU79 (+1)      | Dnajb1       | 38 kDa  | 0            | 0           | 0            | 2.0416      | 3.008        | FALSE     |
| DnaJ (Hsp40) homolog, subfamily C, member 3 OS=Mus musculus GN=Dnajc3 PE=1 SV=1                | Q3UFV9 (+2)      | Dnajc3       | 57 kDa  | 0            | 0           | 0            | 2.0416      | 1.7189       | FALSE     |
| DnaJ heat shock protein family (Hsp40) member C13 OS=Mus musculus GN=Dnajc13 PE=1 SV=1         | G3X922           | Dnajc13      | 254 kDa | 0            | 0           | 0            | 3.6749      | 3.8675       | FALSE     |
| DnaJ homolog subfamily B member 4 OS=Mus musculus GN=Dnajb4 PE=1 SV=1                          | Q9D832           | Dnajb4       | 38 kDa  | 0            | 0           | 0            | 2.45        | 1.7189       | FALSE     |
| DnaJ homolog subfamily C member 10 OS=Mus musculus GN=Dnajc10 PE=1 SV=2                        | Q9DC23           | Dnajc10      | 91 kDa  | 0            | 0           | 0            | 3.2666      | 3.8675       | FALSE     |
| DnaJ homolog subfamily C member 2 OS=Mus musculus GN=Dnajc2 PE=1 SV=2                          | P54103           | Dnajc2       | 72 kDa  | 0            | 0           | 0            | 2.45        | 3.8675       | FALSE     |
| DnaJ homolog subfamily C member 8 (Fragment) OS=Mus musculus GN=Dnajc8 PE=1 SV=1               | F6TQL3           | Dnajc8       | 28 kDa  | 0            | 0           | 0            | 0.81665     | 0            | FALSE     |
| DnaJ homolog subfamily C member 9 OS=Mus musculus GN=Dnajc9 PE=1 SV=2                          | Q91WN1           | Dnajc9       | 30 kDa  | 0            | 0           | 0            | 1.225       | 3.008        | FALSE     |
| Dolichyl-diphosphooligosaccharide-protein glycosyltransferase subunit DAD1 OS=Mus musculus     | P61804           | Dad1         | 12 kDa  | 0            | 0           | 0            | 0.81665     | 0            | FALSE     |
| Dolichyl-diphosphooligosaccharide-protein glycosyltransferase subunit STT3B OS=Mus musculus    | A0A0R4J0D3 (+1)  | Stt3b        | 93 kDa  | 0            | 0           | 0            | 3.2666      | 1.7189       | FALSE     |

| Identified Proteins (2666)                                                                   | Accession Number | Alternate ID | MW      | VPSko-biotin | ctrl-biotin | VPSoe-biotin | ctrl lysate | VPSoe lysate | enriched? |
|----------------------------------------------------------------------------------------------|------------------|--------------|---------|--------------|-------------|--------------|-------------|--------------|-----------|
| Double-stranded RNA-binding protein Staufen homolog 1 OS=Mus musculus GN=Stau1 PE=1 SV=      | A2A5R8 (+1)      | Stau1        | 54 kDa  | 0            | 0           | 0            | 1.225       | 0.85944      | FALSE     |
| Drebrin OS=Mus musculus GN=Dbrn1 PE=1 SV=1                                                   | A0A0R4J1E3 (+2)  | Dbrn1        | 73 kDa  | 0            | 0           | 0            | 1.225       | 0.85944      | FALSE     |
| Drebrin-like protein OS=Mus musculus GN=Dbrn1 PE=1 SV=2                                      | Q62418           | Dbrn1        | 49 kDa  | 0            | 0           | 0            | 4.0833      | 4.7269       | FALSE     |
| Dual specificity mitogen-activated protein kinase kinase 2 OS=Mus musculus GN=Map2k2 PE=1    | Q63932 (+1)      | Map2k2       | 44 kDa  | 0            | 0           | 0            | 2.0416      | 2.1486       | FALSE     |
| Dual specificity mitogen-activated protein kinase kinase 4 OS=Mus musculus GN=Map2k4 PE=1    | P47809 (+1)      | Map2k4       | 44 kDa  | 0            | 0           | 0            | 0           | 0.85944      | FALSE     |
| Dual-specificity protein phosphatase 3 OS=Mus musculus GN=Dusp3 PE=1 SV=1                    | B1AQF4 (+2)      | Dusp3        | 23 kDa  | 0            | 0           | 0            | 0.81665     | 0.85944      | FALSE     |
| Dynactin 2 OS=Mus musculus GN=Dctn2 PE=1 SV=1                                                | Q3TPZ5 (+1)      | Dctn2        | 44 kDa  | 0            | 0           | 0            | 3.6749      | 2.5783       | FALSE     |
| Dynactin subunit 1 OS=Mus musculus GN=Dctn1 PE=1 SV=3                                        | O08788           | Dctn1        | 142 kDa | 0            | 0           | 0            | 8.1665      | 6.4458       | FALSE     |
| Dynamamin-1 OS=Mus musculus GN=Dnm1 PE=1 SV=2                                                | P39053           | Dnm1         | 98 kDa  | 0            | 0           | 0            | 2.45        | 0            | FALSE     |
| Dynamamin-like 120 kDa protein, mitochondrial OS=Mus musculus GN=Opa1 PE=1 SV=1              | P58281           | Opa1         | 111 kDa | 0            | 0           | 0            | 1.225       | 1.2892       | FALSE     |
| Dynein cytoplasmic 1 light intermediate chain 1 OS=Mus musculus GN=Dync1li1 PE=1 SV=1        | Q3TGW5 (+1)      | Dync1li1     | 57 kDa  | 0            | 0           | 0            | 2.8583      | 3.008        | FALSE     |
| Dystonin OS=Mus musculus GN=Dst PE=1 SV=2                                                    | Q91ZU6 (+1)      | Dst          | 834 kDa | 0            | 0           | 0            | 0.81665     | 0            | FALSE     |
| E-selectin ligand 1 OS=Mus musculus GN=Glg1 PE=1 SV=1                                        | Q53WR6 (+1)      | Glg1         | 134 kDa | 3.6831       | 0           | 0            | 4.4916      | 3.8675       | FALSE     |
| E2 ubiquitin-conjugating enzyme UBE2O OS=Mus musculus GN=Ube2o PE=1 SV=3                     | sp Q6ZPJ3 UBE2O_ | Ube2o        | 141 kDa | 0            | 0           | 0            | 2.8583      | 4.2972       | FALSE     |
| E3 ubiquitin-protein ligase ARIH1 OS=Mus musculus GN=Arih1 PE=1 SV=3                         | Q9Z1K5           | Arih1        | 64 kDa  | 0            | 0           | 0            | 1.225       | 2.1486       | FALSE     |
| E3 ubiquitin-protein ligase HECTD1 OS=Mus musculus GN=Hectd1 PE=1 SV=1                       | F8WIE5           | Hectd1       | 289 kDa | 0            | 0           | 0            | 3.2666      | 0.85944      | FALSE     |
| E3 ubiquitin-protein ligase HUWE1 OS=Mus musculus GN=Huwe1 PE=1 SV=5                         | Q7TMY8           | Huwe1        | 483 kDa | 0            | 0           | 0            | 4.0833      | 8.5944       | FALSE     |
| E3 ubiquitin-protein ligase MARCH5 OS=Mus musculus GN=March5 PE=1 SV=1                       | A0A0R4J1H0 (+2)  | March5       | 27 kDa  | 0            | 0           | 0            | 0.81665     | 0            | FALSE     |
| E3 ubiquitin-protein ligase Midline-1 OS=Mus musculus GN=Mid1 PE=1 SV=1                      | B1AV01 (+1)      | Mid1         | 72 kDa  | 0            | 0           | 0            | 0.81665     | 0            | FALSE     |
| E3 ubiquitin-protein ligase OS=Mus musculus GN=Nedd4 PE=1 SV=1                               | B2RSC8 (+1)      | Nedd4        | 103 kDa | 5.5246       | 9.5872      | 5.3684       | 11.841      | 15.9         | FALSE     |
| E3 ubiquitin-protein ligase PPP1R11 OS=Mus musculus GN=Ppp1r11 PE=1 SV=1                     | Q8K1L5           | Ppp1r11      | 15 kDa  | 0            | 0           | 0            | 1.225       | 1.7189       | FALSE     |
| E3 ubiquitin-protein ligase Praja-2 OS=Mus musculus GN=Pja2 PE=1 SV=2                        | Q80U04           | Pja2         | 78 kDa  | 0            | 0           | 0            | 0           | 0.85944      | FALSE     |
| E3 ubiquitin-protein ligase RLIIM OS=Mus musculus GN=Rlim PE=1 SV=2                          | Q9WTV7           | Rlim         | 66 kDa  | 0            | 0           | 0            | 0           | 0.85944      | FALSE     |
| E3 ubiquitin-protein ligase RNF114 OS=Mus musculus GN=Rnf114 PE=1 SV=2                       | Q9ET26           | Rnf114       | 26 kDa  | 0            | 0           | 0            | 0.81665     | 0.85944      | FALSE     |
| E3 ubiquitin-protein ligase TRIP12 OS=Mus musculus GN=Trip12 PE=1 SV=1                       | G5E870           | Trip12       | 224 kDa | 0            | 0           | 0            | 2.45        | 0.85944      | FALSE     |
| E3 ubiquitin-protein ligase UBR4 OS=Mus musculus GN=Ubr4 PE=1 SV=1                           | A2AN08           | Ubr4         | 572 kDa | 3.6831       | 4.7936      | 0            | 7.3499      | 9.8835       | FALSE     |
| Echinoderm microtubule-associated protein-like 1 OS=Mus musculus GN=Eml1 PE=1 SV=1           | Q05BC3           | Eml1         | 90 kDa  | 0            | 0           | 0            | 0.81665     | 0.85944      | FALSE     |
| Echinoderm microtubule-associated protein-like 3 OS=Mus musculus GN=Eml3 PE=1 SV=1           | Q8VCO3           | Eml3         | 96 kDa  | 0            | 0           | 0            | 0           | 0.85944      | FALSE     |
| Echinoderm microtubule-associated protein-like 4 OS=Mus musculus GN=Eml4 PE=1 SV=1           | F8WJ93 (+1)      | Eml4         | 110 kDa | 0            | 0           | 0            | 0.81665     | 2.1486       | FALSE     |
| Ectonucleotide pyrophosphatase/phosphodiesterase family member 2 OS=Mus musculus GN=Enp      | G3UXY9 (+1)      | Enpp2        | 105 kDa | 0            | 0           | 0            | 0.81665     | 0.85944      | FALSE     |
| EGF domain-specific O-linked N-acetylglucosamine transferase OS=Mus musculus GN=Eogt PE=1    | Q8BYW9           | Eogt         | 61 kDa  | 0            | 0           | 0            | 0           | 0.85944      | FALSE     |
| EH domain-containing protein 2 OS=Mus musculus GN=Ehd2 PE=1 SV=1                             | Q8BH64           | Ehd2         | 61 kDa  | 0            | 0           | 0            | 3.6749      | 2.5783       | FALSE     |
| EH-domain containing 1 OS=Mus musculus GN=Ehd1 PE=1 SV=2                                     | Q80ZZ0 (+2)      | Ehd1         | 61 kDa  | 0            | 0           | 3.5789       | 6.5332      | 5.5863       | FALSE     |
| EH-domain containing 4 OS=Mus musculus GN=Ehd4 PE=1 SV=1                                     | Q3TM70 (+1)      | Ehd4         | 61 kDa  | 0            | 0           | 0            | 1.6333      | 0.85944      | FALSE     |
| Eif2ak2 protein OS=Mus musculus GN=Eif2ak2 PE=2 SV=1                                         | Q91YN2           | Eif2ak2      | 58 kDa  | 0            | 0           | 0            | 3.2666      | 1.2892       | FALSE     |
| Eif2s2 protein OS=Mus musculus GN=Eif2s2 PE=1 SV=1                                           | Q3ULL5 (+1)      | Eif2s2       | 38 kDa  | 0            | 0           | 0            | 4.4916      | 5.5863       | FALSE     |
| Electron transfer flavoprotein subunit alpha, mitochondrial OS=Mus musculus GN=Etfa PE=1 SV= | Q99LC5           | Etfa         | 35 kDa  | 0            | 0           | 0            | 3.6749      | 4.7269       | FALSE     |
| Electron transfer flavoprotein subunit beta OS=Mus musculus GN=Etfb PE=1 SV=3                | Q9DCW4           | Etfb         | 28 kDa  | 0            | 0           | 0            | 3.6749      | 5.1566       | FALSE     |
| Electron transfer flavoprotein-ubiquinone oxidoreductase, mitochondrial OS=Mus musculus GN=  | Q921G7           | Etfdh        | 68 kDa  | 0            | 0           | 0            | 1.225       | 1.2892       | FALSE     |
| Elongation factor 1-beta OS=Mus musculus GN=Eef1b PE=1 SV=5                                  | O70251           | Eef1b        | 25 kDa  | 0            | 3.1957      | 0            | 4.0833      | 4.2972       | FALSE     |
| Elongation factor G, mitochondrial OS=Mus musculus GN=Gfm1 PE=1 SV=1                         | Q8K0D5           | Gfm1         | 84 kDa  | 0            | 0           | 0            | 1.225       | 3.4377       | FALSE     |
| Elongation factor Ts, mitochondrial OS=Mus musculus GN=Tsfm PE=2 SV=1                        | A0A156GWJ9 (+2)  | Tsfm         | 36 kDa  | 0            | 0           | 0            | 0.81665     | 0.85944      | FALSE     |
| Elongation factor-like GTPase 1 OS=Mus musculus GN=Efl1 PE=1 SV=1                            | Q8COD5           | Efl1         | 126 kDa | 0            | 0           | 0            | 1.225       | 0.85944      | FALSE     |
| Elongator complex protein 1 OS=Mus musculus GN=Elp1 PE=1 SV=2                                | Q7TT37           | Elp1         | 150 kDa | 0            | 0           | 0            | 3.6749      | 3.8675       | FALSE     |
| Elongator complex protein 2 OS=Mus musculus GN=Elp2 PE=1 SV=1                                | Q91WG4           | Elp2         | 93 kDa  | 0            | 0           | 0            | 2.0416      | 2.1486       | FALSE     |
| Elongator complex protein 3 OS=Mus musculus GN=Elp3 PE=1 SV=1                                | Q9CZX0           | Elp3         | 62 kDa  | 0            | 0           | 0            | 2.45        | 2.5783       | FALSE     |
| Elongator complex protein 4 OS=Mus musculus GN=Elp4 PE=1 SV=2                                | Q9ER73           | Elp4         | 46 kDa  | 0            | 0           | 0            | 0           | 0.85944      | FALSE     |
| Elongin-C OS=Mus musculus GN=Eloc PE=1 SV=1                                                  | A0A087WNT1 (+2)  | Eloc         | 15 kDa  | 0            | 0           | 0            | 3.2666      | 3.008        | FALSE     |
| Endophilin-B1 OS=Mus musculus GN=Sh3glb1 PE=1 SV=1                                           | Q9JK48           | Sh3glb1      | 41 kDa  | 0            | 0           | 0            | 1.6333      | 0            | FALSE     |
| Endoplasmic reticulum aminopeptidase 1 OS=Mus musculus GN=Erap1 PE=1 SV=2                    | Q9EQH2           | Erap1        | 107 kDa | 0            | 0           | 0            | 3.2666      | 0            | FALSE     |
| Endoplasmic reticulum junction formation protein lunapark OS=Mus musculus GN=Lnpk PE=1 SV=   | Q7TQ95           | Lnpk         | 48 kDa  | 0            | 0           | 0            | 1.225       | 1.7189       | FALSE     |

| Identified Proteins (2666)                                                                         | Accession Number | Alternate ID | MW      | VPSko-biotin | ctrl-biotin | VPSoe-biotin | ctrl lysate | VPSoe lysate | enriched? |
|----------------------------------------------------------------------------------------------------|------------------|--------------|---------|--------------|-------------|--------------|-------------|--------------|-----------|
| Endoplasmic reticulum metalloproteinase 1 OS=Mus musculus GN=Ermp1 PE=1 SV=2                       | Q3UVK0           | Ermp1        | 100 kDa | 0            | 0           | 0            | 2.0416      | 1.2892       | FALSE     |
| Endoplasmic reticulum resident protein 29 OS=Mus musculus GN=Erp29 PE=1 SV=2                       | P57759           | Erp29        | 29 kDa  | 0            | 0           | 0            | 0.81665     | 0.85944      | FALSE     |
| Endoplasmic reticulum-Golgi intermediate compartment protein 3 OS=Mus musculus GN=Ergic3           | Q9CQE7           | Ergic3       | 43 kDa  | 0            | 0           | 0            | 0.81665     | 0            | FALSE     |
| Engulfment and cell motility protein 2 OS=Mus musculus GN=Elmo2 PE=1 SV=1                          | Q8BHL5           | Elmo2        | 84 kDa  | 0            | 0           | 0            | 0.81665     | 0            | FALSE     |
| Enhancer of mRNA-decapping protein 4 OS=Mus musculus GN=Edec4 PE=1 SV=2                            | Q3UJB9           | Edec4        | 152 kDa | 0            | 0           | 0            | 1.6333      | 3.008        | FALSE     |
| Enoyl-[acyl-carrier-protein] reductase, mitochondrial OS=Mus musculus GN=Mecr PE=1 SV=2            | Q9DCS3           | Mecr         | 40 kDa  | 0            | 0           | 0            | 0.81665     | 0.85944      | FALSE     |
| Enoyl-CoA delta isomerase 2, mitochondrial OS=Mus musculus GN=Eci2 PE=1 SV=2                       | Q9WUR2           | Eci2         | 43 kDa  | 0            | 0           | 0            | 1.225       | 2.1486       | FALSE     |
| Enoyl-CoA hydratase, mitochondrial OS=Mus musculus GN=Echs1 PE=1 SV=1                              | Q8BH95           | Echs1        | 31 kDa  | 0            | 0           | 0            | 2.45        | 2.1486       | FALSE     |
| Epidermal growth factor receptor kinase substrate 8 OS=Mus musculus GN=Eps8 PE=1 SV=2              | Q08509 (+1)      | Eps8         | 92 kDa  | 0            | 0           | 0            | 0           | 0.85944      | FALSE     |
| Epidermal growth factor receptor substrate 15-like 1 OS=Mus musculus GN=Eps151 PE=1 SV=3           | Q60902           | Eps151       | 99 kDa  | 0            | 0           | 0            | 1.225       | 0            | FALSE     |
| ER membrane protein complex subunit 3 OS=Mus musculus GN=Emc3 PE=1 SV=3                            | Q99KI3           | Emc3         | 30 kDa  | 0            | 0           | 0            | 0           | 0.85944      | FALSE     |
| ER membrane protein complex subunit 4 OS=Mus musculus GN=Emc4 PE=1 SV=1                            | Q9CZX9           | Emc4         | 20 kDa  | 0            | 0           | 0            | 0           | 0.85944      | FALSE     |
| Erbp2 interacting protein OS=Mus musculus GN=Erbin PE=2 SV=1                                       | B2RUK2 (+2)      | Erbin        | 162 kDa | 0            | 0           | 0            | 1.225       | 0            | FALSE     |
| Erlin-2 OS=Mus musculus GN=Erlin2 PE=1 SV=1                                                        | Q8BFZ9           | Erlin2       | 38 kDa  | 0            | 0           | 0            | 1.6333      | 1.2892       | FALSE     |
| Ero1 protein OS=Mus musculus GN=Ero1 PE=1 SV=1                                                     | Q4FK57 (+1)      | Ero1         | 54 kDa  | 0            | 0           | 0            | 3.2666      | 4.7269       | FALSE     |
| Erythrocyte protein band 4.1-like 3 isoform B OS=Mus musculus GN=Epb4113 PE=2 SV=1                 | D0VYV6           | Epb4113      | 101 kDa | 0            | 0           | 0            | 11.025      | 12.032       | FALSE     |
| ES1 protein homolog, mitochondrial OS=Mus musculus GN=D10Jhu81e PE=1 SV=1                          | Q9D172           | D10Jhu81e    | 28 kDa  | 0            | 0           | 0            | 1.6333      | 0.85944      | FALSE     |
| Ester hydrolase C11orf54 homolog OS=Mus musculus PE=1 SV=1                                         | Q91V76           |              | 35 kDa  | 0            | 0           | 0            | 0           | 0.85944      | FALSE     |
| Estradiol 17-beta-dehydrogenase 11 OS=Mus musculus GN=Hsd17b11 PE=1 SV=1                           | Q9EQ06           | Hsd17b11     | 33 kDa  | 0            | 0           | 0            | 1.6333      | 0.85944      | FALSE     |
| Eukaryotic initiation factor 4A-I OS=Mus musculus GN=Eif4a1 PE=1 SV=1                              | P60843 (+3)      | Eif4a1       | 46 kDa  | 7.3662       | 11.185      | 16.105       | 17.15       | 17.618       | FALSE     |
| Eukaryotic initiation factor 4A-II OS=Mus musculus GN=Eif4a2 PE=1 SV=2                             | P10630 (+1)      | Eif4a2       | 46 kDa  | 0            | 0           | 0            | 5.7166      | 6.4458       | FALSE     |
| Eukaryotic initiation factor 4A-III OS=Mus musculus GN=Eif4a3 PE=1 SV=3                            | Q91VC3           | Eif4a3       | 47 kDa  | 0            | 0           | 0            | 3.2666      | 3.4377       | FALSE     |
| Eukaryotic peptide chain release factor GTP-binding subunit ERF3A OS=Mus musculus GN=Gsp1          | Q8R050           | Gsp1         | 69 kDa  | 0            | 3.1957      | 0            | 4.8999      | 4.2972       | FALSE     |
| Eukaryotic translation initiation factor 1A, X-chromosomal OS=Mus musculus GN=Eif1ax PE=2 SV=1     | Q8BMJ3           | Eif1ax       | 16 kDa  | 0            | 0           | 0            | 1.225       | 0.85944      | FALSE     |
| Eukaryotic translation initiation factor 1b OS=Mus musculus GN=Eif1b PE=1 SV=2                     | Q9CXU9 (+3)      | Eif1b        | 13 kDa  | 0            | 0           | 0            | 0.81665     | 0            | FALSE     |
| Eukaryotic translation initiation factor 2 subunit 1 OS=Mus musculus GN=Eif2s1 PE=1 SV=3           | Q6ZWX6           | Eif2s1       | 36 kDa  | 3.6831       | 3.1957      | 3.5789       | 6.1249      | 5.1566       | FALSE     |
| Eukaryotic translation initiation factor 2A OS=Mus musculus GN=Eif2a PE=1 SV=2                     | Q8BJW6           | Eif2a        | 64 kDa  | 0            | 0           | 0            | 4.4916      | 3.4377       | FALSE     |
| Eukaryotic translation initiation factor 2B, subunit 1 (Alpha) OS=Mus musculus GN=Eif2b1 PE=1 SV=1 | Q3UZR8 (+1)      | Eif2b1       | 34 kDa  | 0            | 0           | 0            | 0.81665     | 1.7189       | FALSE     |
| Eukaryotic translation initiation factor 2B, subunit 3 OS=Mus musculus GN=Eif2b3 PE=1 SV=1         | Q3UKV0           | Eif2b3       | 50 kDa  | 0            | 0           | 0            | 0.81665     | 0.85944      | FALSE     |
| Eukaryotic translation initiation factor 3 subunit B OS=Mus musculus GN=Eif3b PE=2 SV=1            | Q8CIJ3 (+1)      | Eif3b        | 109 kDa | 7.3662       | 11.185      | 10.737       | 11.841      | 15.04        | FALSE     |
| Eukaryotic translation initiation factor 3 subunit C OS=Mus musculus GN=Eif3c PE=1 SV=1            | Q8RI84           | Eif3c        | 106 kDa | 5.5246       | 6.3914      | 7.1579       | 10.208      | 9.4538       | FALSE     |
| Eukaryotic translation initiation factor 3 subunit D OS=Mus musculus GN=Eif3d PE=1 SV=2            | O70194           | Eif3d        | 64 kDa  | 0            | 0           | 0            | 7.7582      | 8.1647       | FALSE     |
| Eukaryotic translation initiation factor 3 subunit F OS=Mus musculus GN=Eif3f PE=2 SV=1            | Q3U8X1 (+4)      | Eif3f        | 38 kDa  | 0            | 3.1957      | 0            | 3.2666      | 3.4377       | FALSE     |
| Eukaryotic translation initiation factor 3 subunit G OS=Mus musculus GN=Eif3g PE=1 SV=1            | Q544H0 (+1)      | Eif3g        | 36 kDa  | 0            | 0           | 0            | 3.2666      | 4.2972       | FALSE     |
| Eukaryotic translation initiation factor 3 subunit H OS=Mus musculus GN=Eif3h PE=2 SV=1            | Q3THW7 (+3)      | Eif3h        | 40 kDa  | 0            | 0           | 0            | 2.45        | 1.2892       | FALSE     |
| Eukaryotic translation initiation factor 3 subunit I OS=Mus musculus GN=Eif3i PE=1 SV=1            | Q9QZD9           | Eif3i        | 36 kDa  | 0            | 3.1957      | 3.5789       | 5.3082      | 5.5863       | FALSE     |
| Eukaryotic translation initiation factor 3 subunit J-A OS=Mus musculus GN=Eif3j1 PE=2 SV=1         | Q3UGC7 (+1)      | Eif3j1       | 29 kDa  | 0            | 0           | 0            | 1.6333      | 1.2892       | FALSE     |
| Eukaryotic translation initiation factor 3 subunit K OS=Mus musculus GN=Eif3k PE=1 SV=1            | Q9DBZ5           | Eif3k        | 25 kDa  | 0            | 0           | 0            | 1.6333      | 1.2892       | FALSE     |
| Eukaryotic translation initiation factor 3 subunit M OS=Mus musculus GN=Eif3m PE=1 SV=1            | Q99JX4           | Eif3m        | 43 kDa  | 0            | 0           | 0            | 2.0416      | 2.1486       | FALSE     |
| Eukaryotic translation initiation factor 4 gamma 1 OS=Mus musculus GN=Eif4g1 PE=1 SV=1             | Q6NZJ6           | Eif4g1       | 176 kDa | 0            | 0           | 0            | 9.7998      | 12.462       | FALSE     |
| Eukaryotic translation initiation factor 4E OS=Mus musculus GN=Eif4e PE=1 SV=1                     | P63073 (+1)      | Eif4e        | 25 kDa  | 0            | 0           | 0            | 0.81665     | 1.7189       | FALSE     |
| Eukaryotic translation initiation factor 5 OS=Mus musculus GN=Eif5 PE=1 SV=1                       | P59325 (+1)      | Eif5         | 49 kDa  | 0            | 0           | 0            | 2.0416      | 2.5783       | FALSE     |
| Eukaryotic translation initiation factor 5A-1 OS=Mus musculus GN=Eif5a PE=1 SV=2                   | P63242           | Eif5a        | 17 kDa  | 7.3662       | 7.9893      | 8.9474       | 9.7998      | 10.743       | FALSE     |
| Eukaryotic translation initiation factor 5B OS=Mus musculus GN=Eif5b PE=1 SV=2                     | Q05D44           | Eif5b        | 138 kDa | 0            | 0           | 0            | 5.3082      | 6.8755       | FALSE     |
| Eukaryotic translation initiation factor 6 OS=Mus musculus GN=Eif6 PE=1 SV=2                       | O55135 (+3)      | Eif6         | 27 kDa  | 0            | 0           | 0            | 3.6749      | 3.8675       | FALSE     |
| Exopolyphosphatase PRUNE1 OS=Mus musculus GN=Prune1 PE=1 SV=1                                      | Q8BIW1           | Prune1       | 50 kDa  | 0            | 0           | 0            | 0           | 0.85944      | FALSE     |
| Exosome complex component CSL4 OS=Mus musculus GN=Exosc1 PE=1 SV=1                                 | Q9DAA6           | Exosc1       | 21 kDa  | 0            | 0           | 0            | 0           | 0.85944      | FALSE     |
| Exosome complex component RRP45 OS=Mus musculus GN=Exosc9 PE=1 SV=1                                | Q9JHI7           | Exosc9       | 49 kDa  | 0            | 0           | 0            | 0.81665     | 0.85944      | FALSE     |
| Exosome complex exonuclease RRP44 OS=Mus musculus GN=Dis3 PE=1 SV=4                                | Q9CSH3           | Dis3         | 109 kDa | 0            | 0           | 0            | 6.1249      | 9.4538       | FALSE     |
| Exosome RNA helicase MTR4 OS=Mus musculus GN=Mtrex PE=1 SV=1                                       | Q9CZU3           | Mtrex        | 118 kDa | 0            | 0           | 0            | 0.81665     | 0.85944      | FALSE     |
| Exportin-5 OS=Mus musculus GN=Xpo5 PE=1 SV=1                                                       | Q924C1           | Xpo5         | 137 kDa | 0            | 0           | 3.5789       | 6.5332      | 6.0161       | FALSE     |

| Identified Proteins (2666)                                                                   | Accession Number | Alternate ID | MW      | VPSko-biotin | ctrl-biotin | VPSoe-biotin | ctrl lysate | VPSoe lysate | enriched? |
|----------------------------------------------------------------------------------------------|------------------|--------------|---------|--------------|-------------|--------------|-------------|--------------|-----------|
| Exportin-7 OS=Mus musculus GN=Xpo7 PE=1 SV=1                                                 | E9PUW7 (+1)      | Xpo7         | 124 kDa | 0            | 0           | 0            | 2.8583      | 4.2972       | FALSE     |
| Exportin-T OS=Mus musculus GN=Xpot PE=1 SV=1                                                 | A0A1W2P7Q6 (+1)  | Xpot         | 110 kDa | 0            | 0           | 0            | 3.2666      | 2.1486       | FALSE     |
| Extended synaptotagmin-1 OS=Mus musculus GN=Esyt1 PE=1 SV=2                                  | Q3U7R1           | Esyt1        | 122 kDa | 0            | 0           | 0            | 2.0416      | 1.7189       | FALSE     |
| Extended synaptotagmin-2 OS=Mus musculus GN=Esyt2 PE=1 SV=1                                  | Q3TZZ7           | Esyt2        | 94 kDa  | 0            | 0           | 0            | 1.225       | 0.85944      | FALSE     |
| Extracellular matrix protein OS=Mus musculus PE=4 SV=1                                       | Q9QX30           |              | 63 kDa  | 0            | 0           | 0            | 2.0416      | 4.7269       | FALSE     |
| Extracellular superoxide dismutase [Cu-Zn] OS=Mus musculus GN=Sod3 PE=1 SV=1                 | O09164 (+1)      | Sod3         | 27 kDa  | 0            | 0           | 0            | 0           | 0.85944      | FALSE     |
| Ezrin OS=Mus musculus GN=Ezr PE=1 SV=3                                                       | P26040 (+3)      | Ezr          | 69 kDa  | 0            | 0           | 0            | 6.5332      | 6.4458       | FALSE     |
| F-box only protein 30 OS=Mus musculus GN=Fbxo30 PE=1 SV=2                                    | Q8BJL1           | Fbxo30       | 83 kDa  | 0            | 0           | 0            | 2.45        | 0.85944      | FALSE     |
| FACT complex subunit SSRP1 OS=Mus musculus GN=Ssrp1 PE=1 SV=2                                | Q08943           | Ssrp1        | 81 kDa  | 0            | 0           | 0            | 3.6749      | 4.2972       | FALSE     |
| FAD-linked sulfhydryl oxidase ALR OS=Mus musculus GN=Gfer PE=1 SV=2                          | P56213           | Gfer         | 23 kDa  | 0            | 0           | 0            | 0           | 0.85944      | FALSE     |
| Far upstream element-binding protein 1 OS=Mus musculus GN=Fubp1 PE=1 SV=1                    | Q3TUE1           | Fubp1        | 67 kDa  | 0            | 0           | 0            | 4.4916      | 3.8675       | FALSE     |
| Far upstream element-binding protein 2 OS=Mus musculus GN=Khsrp PE=1 SV=2                    | Q3U0V1           | Khsrp        | 77 kDa  | 3.6831       | 3.1957      | 5.3684       | 10.616      | 13.751       | FALSE     |
| FAS-associated factor 1 OS=Mus musculus GN=Faf1 PE=1 SV=2                                    | P54731           | Faf1         | 74 kDa  | 0            | 0           | 0            | 0.81665     | 0            | FALSE     |
| FAS-associated factor 2 OS=Mus musculus GN=Faf2 PE=1 SV=2                                    | Q3TDN2           | Faf2         | 52 kDa  | 0            | 0           | 0            | 2.0416      | 2.1486       | FALSE     |
| Fatty acid-binding protein, adipocyte OS=Mus musculus GN=Fabp4 PE=1 SV=3                     | P04117 (+1)      | Fabp4        | 15 kDa  | 0            | 0           | 0            | 3.2666      | 3.4377       | FALSE     |
| Fatty acid-binding protein, epidermal OS=Mus musculus GN=Fabp5 PE=1 SV=3                     | Q05816 (+1)      | Fabp5        | 15 kDa  | 0            | 0           | 0            | 11.025      | 17.189       | FALSE     |
| Fdps protein OS=Mus musculus GN=Fdps PE=1 SV=1                                               | Q4FJN9 (+1)      | Fdps         | 41 kDa  | 0            | 0           | 0            | 3.2666      | 0.85944      | FALSE     |
| Ferritin light chain 1 OS=Mus musculus GN=Ftl1 PE=1 SV=2                                     | P29391 (+3)      | Ftl1         | 21 kDa  | 0            | 0           | 0            | 0           | 2.5783       | FALSE     |
| Fibronectin type III domain-containing protein 3B OS=Mus musculus GN=Fndc3b PE=1 SV=1        | Q6NWW9           | Fndc3b       | 133 kDa | 0            | 0           | 0            | 2.45        | 1.7189       | FALSE     |
| Filamin-binding LIM protein 1 OS=Mus musculus GN=Fblim1 PE=1 SV=2                            | Q71FD7           | Fblim1       | 41 kDa  | 0            | 0           | 0            | 1.225       | 1.2892       | FALSE     |
| Filamin-C OS=Mus musculus GN=Flnc PE=1 SV=3                                                  | Q8VHX6           | Flnc         | 291 kDa | 22.099       | 22.37       | 23.263       | 37.974      | 38.675       | FALSE     |
| Flap endonuclease 1 OS=Mus musculus GN=Fen1 PE=2 SV=1                                        | Q3TGH6 (+2)      | Fen1         | 43 kDa  | 0            | 0           | 0            | 1.225       | 1.7189       | FALSE     |
| Focal adhesion kinase 1 OS=Mus musculus GN=Ptk2 PE=1 SV=3                                    | P34152           | Ptk2         | 124 kDa | 0            | 0           | 0            | 2.0416      | 0.85944      | FALSE     |
| Follistatin-related protein 1 OS=Mus musculus GN=Fstl1 PE=1 SV=2                             | Q62356           | Fstl1        | 35 kDa  | 0            | 0           | 0            | 3.6749      | 4.7269       | FALSE     |
| Forkhead box protein K1 OS=Mus musculus GN=Foxk1 PE=1 SV=2                                   | P42128           | Foxk1        | 75 kDa  | 0            | 0           | 0            | 0.81665     | 2.1486       | FALSE     |
| Four and a half LIM domains protein 1 OS=Mus musculus GN=Fhl1 PE=1 SV=1                      | A2AEX6 (+2)      | Fhl1         | 35 kDa  | 0            | 0           | 0            | 3.2666      | 1.2892       | FALSE     |
| Four and a half LIM domains protein 2 OS=Mus musculus GN=Fhl2 PE=1 SV=1                      | O70433 (+1)      | Fhl2         | 32 kDa  | 0            | 0           | 0            | 4.4916      | 4.2972       | FALSE     |
| Four and a half LIM domains protein 3 OS=Mus musculus GN=Fhl3 PE=1 SV=2                      | Q9R059           | Fhl3         | 32 kDa  | 0            | 0           | 0            | 2.8583      | 3.008        | FALSE     |
| Fragile X mental retardation syndrome-related protein 2 OS=Mus musculus GN=Fxr2 PE=1 SV=1    | Q6P5B5           | Fxr2         | 74 kDa  | 0            | 0           | 0            | 2.0416      | 1.2892       | FALSE     |
| Fructose-bisphosphate aldolase A OS=Mus musculus GN=Aldoa PE=1 SV=2                          | P05064 (+1)      | Aldoa        | 39 kDa  | 16.574       | 17.576      | 14.316       | 25.725      | 23.205       | FALSE     |
| Fumarate hydratase, mitochondrial OS=Mus musculus GN=Fh PE=1 SV=3                            | P97807           | Fh           | 54 kDa  | 0            | 0           | 0            | 2.8583      | 4.2972       | FALSE     |
| FUN14 domain-containing protein 2 OS=Mus musculus GN=Fundc2 PE=1 SV=1                        | Q9D6K8           | Fundc2       | 17 kDa  | 0            | 0           | 0            | 0.81665     | 0            | FALSE     |
| Fusion, derived from t(12;16) malignant liposarcoma (Human) OS=Mus musculus GN=Fus PE=1 SV=1 | Q8CFQ9           | Fus          | 53 kDa  | 0            | 0           | 0            | 2.0416      | 1.7189       | FALSE     |
| G1p2 protein OS=Mus musculus GN=lsg15 PE=1 SV=1                                              | Q4FJR9 (+1)      | lsg15        | 18 kDa  | 0            | 0           | 0            | 3.6749      | 0            | FALSE     |
| GA-binding protein alpha chain OS=Mus musculus GN=Gabpa PE=1 SV=2                            | Q00422 (+2)      | Gabpa        | 51 kDa  | 0            | 0           | 0            | 2.45        | 1.2892       | FALSE     |
| Galactokinase OS=Mus musculus GN=Galk1 PE=1 SV=2                                             | Q9R0N0           | Galk1        | 42 kDa  | 0            | 0           | 0            | 2.8583      | 3.008        | FALSE     |
| Galectin-3-binding protein OS=Mus musculus GN=Lgals3bp PE=1 SV=1                             | Q07797           | Lgals3bp     | 64 kDa  | 0            | 0           | 0            | 3.2666      | 0            | FALSE     |
| Galectin-related protein OS=Mus musculus GN=Lgalsl PE=1 SV=1                                 | Q8VED9           | Lgalsl       | 19 kDa  | 0            | 0           | 0            | 1.225       | 0            | FALSE     |
| Gasdermin-D OS=Mus musculus GN=Gsdmdc1 PE=1 SV=1                                             | Q9D8T2           | Gsdmdc1      | 53 kDa  | 0            | 0           | 0            | 1.225       | 1.7189       | FALSE     |
| Gasdermin-E OS=Mus musculus GN=Gsdme PE=1 SV=1                                               | Q9Z2D3           | Gsdme        | 57 kDa  | 0            | 0           | 0            | 1.6333      | 3.8675       | FALSE     |
| GDH/6PGL endoplasmic bifunctional protein OS=Mus musculus GN=H6pd PE=1 SV=1                  | A2A7A7 (+1)      | H6pd         | 90 kDa  | 0            | 0           | 0            | 3.6749      | 3.008        | FALSE     |
| GDP-fucose protein O-fucosyltransferase 1 OS=Mus musculus GN=Pofut1 PE=1 SV=1                | A2AMC3 (+1)      | Pofut1       | 40 kDa  | 0            | 0           | 0            | 0           | 0.85944      | FALSE     |
| GDP-L-fucose synthase OS=Mus musculus GN=Tsta3 PE=1 SV=3                                     | P23591 (+1)      | Tsta3        | 36 kDa  | 0            | 0           | 0            | 3.2666      | 2.5783       | FALSE     |
| GDP-mannose 4,6 dehydratase OS=Mus musculus GN=Gmds PE=1 SV=1                                | Q8K0C9           | Gmds         | 42 kDa  | 0            | 0           | 0            | 3.2666      | 3.008        | FALSE     |
| Gelsolin, isoform CRA_c OS=Mus musculus GN=Gsn PE=2 SV=1                                     | Q6PAC1           | Gsn          | 81 kDa  | 0            | 6.3914      | 10.737       | 12.658      | 13.321       | FALSE     |
| Gem (Nuclear organelle) associated protein 4 OS=Mus musculus GN=Gemin4 PE=2 SV=1             | Q8K1K1           | Gemin4       | 120 kDa | 0            | 0           | 0            | 0.81665     | 1.2892       | FALSE     |
| Gem-associated protein 5 OS=Mus musculus GN=Gemin5 PE=1 SV=1                                 | A2AFQ9 (+2)      | Gemin5       | 167 kDa | 0            | 0           | 0            | 3.6749      | 3.008        | FALSE     |
| General transcription factor IIF subunit 1 OS=Mus musculus GN=Gtf2f1 PE=1 SV=2               | Q3THK3           | Gtf2f1       | 57 kDa  | 0            | 0           | 0            | 2.45        | 3.4377       | FALSE     |
| General transcription factor IIF subunit 2 OS=Mus musculus GN=Gtf2f2 PE=1 SV=1               | Q3UMJ4 (+1)      | Gtf2f2       | 28 kDa  | 0            | 0           | 0            | 2.0416      | 1.7189       | FALSE     |
| General vesicular transport factor p115 OS=Mus musculus GN=Uso1 PE=1 SV=2                    | Q9Z1Z0           | Uso1         | 107 kDa | 0            | 0           | 0            | 6.9416      | 4.7269       | FALSE     |
| Gephyrin OS=Mus musculus GN=Gphn PE=1 SV=1                                                   | A0JNY3 (+1)      | Gphn         | 84 kDa  | 0            | 0           | 0            | 0           | 0.85944      | FALSE     |

| Identified Proteins (2666)                                                                         | Accession Number | Alternate ID | MW      | VPSko-biotin | ctrl-biotin | VPSoe-biotin | ctrl lysate | VPSoe lysate | enriched? |
|----------------------------------------------------------------------------------------------------|------------------|--------------|---------|--------------|-------------|--------------|-------------|--------------|-----------|
| Girdin OS=Mus musculus GN=Ccdc88a PE=1 SV=2                                                        | Q5SNZ0           | Ccdc88a      | 216 kDa | 0            | 0           | 0            | 0.81665     | 0.85944      | FALSE     |
| Glia maturation factor beta OS=Mus musculus GN=Gmfb PE=2 SV=1                                      | A7VJ98 (+2)      | Gmfb         | 17 kDa  | 0            | 0           | 0            | 0           | 0.85944      | FALSE     |
| Glt8d1 protein OS=Mus musculus GN=Glt8d1 PE=2 SV=1                                                 | Q7TNU1           | Glt8d1       | 20 kDa  | 0            | 0           | 0            | 0           | 1.2892       | FALSE     |
| Glucosamine 6-phosphate N-acetyltransferase OS=Mus musculus GN=Gnpnat1 PE=1 SV=1                   | Q9JK38           | Gnpnat1      | 21 kDa  | 0            | 0           | 0            | 1.6333      | 1.7189       | FALSE     |
| Glucose-6-phosphate 1-dehydrogenase X OS=Mus musculus GN=G6pdx PE=1 SV=3                           | Q00612 (+1)      | G6pdx        | 59 kDa  | 0            | 0           | 0            | 11.025      | 10.743       | FALSE     |
| Glucose-6-phosphate isomerase OS=Mus musculus GN=Gpi PE=1 SV=4                                     | P06745           | Gpi          | 63 kDa  | 3.6831       | 3.1957      | 5.3684       | 8.5749      | 7.7349       | FALSE     |
| Glucosylceramidase OS=Mus musculus GN=Gba PE=1 SV=1                                                | P17439           | Gba          | 58 kDa  | 0            | 0           | 0            | 0.81665     | 0.85944      | FALSE     |
| Glutaminase kidney isoform, mitochondrial OS=Mus musculus GN=Gls PE=1 SV=1                         | D3Z7P3           | Gls          | 74 kDa  | 0            | 0           | 0            | 4.0833      | 4.7269       | FALSE     |
| Glutamine-fructose-6-phosphate aminotransferase [isomerizing] 1 OS=Mus musculus GN=Gfpt1           | P47856           | Gfpt1        | 79 kDa  | 0            | 0           | 0            | 6.1249      | 5.5863       | FALSE     |
| Glutaredoxin-3 OS=Mus musculus GN=Glr3 PE=1 SV=1                                                   | Q9CQM9           | Glr3         | 38 kDa  | 0            | 0           | 0            | 2.0416      | 3.008        | FALSE     |
| Glutaredoxin, isoform CRA_a OS=Mus musculus GN=Glr3 PE=1 SV=1                                      | Q3U6L3 (+1)      | Glr3         | 12 kDa  | 0            | 0           | 0            | 0           | 1.2892       | FALSE     |
| Glutaryl-CoA dehydrogenase, mitochondrial OS=Mus musculus GN=Gcdh PE=1 SV=1                        | A0A0A0MQ68 (+3)  | Gcdh         | 50 kDa  | 0            | 0           | 0            | 0.81665     | 1.7189       | FALSE     |
| Glutathione peroxidase 1 OS=Mus musculus GN=Gpx1 PE=1 SV=2                                         | P11352           | Gpx1         | 22 kDa  | 0            | 0           | 0            | 0.81665     | 0            | FALSE     |
| Glutathione peroxidase OS=Mus musculus GN=Gpx4 PE=2 SV=2                                           | Q3TI34 (+2)      | Gpx4         | 20 kDa  | 0            | 0           | 0            | 0.81665     | 1.2892       | FALSE     |
| Glutathione peroxidase OS=Mus musculus GN=Gpx7 PE=1 SV=1                                           | Q3TNK3 (+1)      | Gpx7         | 21 kDa  | 0            | 0           | 0            | 1.6333      | 1.2892       | FALSE     |
| Glutathione S-transferase (Fragment) OS=Mus musculus GN=Gstm5 PE=1 SV=1                            | E9PVM7           | Gstm5        | 26 kDa  | 0            | 0           | 0            | 1.225       | 1.2892       | FALSE     |
| Glutathione S-transferase Mu 1 OS=Mus musculus GN=Gstm1 PE=1 SV=2                                  | P10649           | Gstm1        | 26 kDa  | 0            | 0           | 3.5789       | 4.8999      | 5.1566       | FALSE     |
| Glutathione S-transferase Mu 2 OS=Mus musculus GN=Gstm2 PE=1 SV=2                                  | P15626           | Gstm2        | 26 kDa  | 0            | 0           | 0            | 2.8583      | 2.1486       | FALSE     |
| Glutathione S-transferase omega-1 OS=Mus musculus GN=Gsto1 PE=1 SV=2                               | O09131           | Gsto1        | 27 kDa  | 0            | 0           | 0            | 2.8583      | 3.8675       | FALSE     |
| Glutathione S-transferase theta-1 OS=Mus musculus GN=Gstt1 PE=1 SV=4                               | Q64471 (+1)      | Gstt1        | 27 kDa  | 0            | 0           | 0            | 1.6333      | 1.7189       | FALSE     |
| Glutathione synthetase OS=Mus musculus GN=Gss PE=1 SV=1                                            | P51855 (+3)      | Gss          | 52 kDa  | 0            | 0           | 0            | 0.81665     | 0            | FALSE     |
| Glyceraldehyde-3-phosphate dehydrogenase OS=Mus musculus GN=Gapdh PE=1 SV=1                        | A0A0A0MQF6 (+2)  | Gapdh        | 39 kDa  | 20.257       | 17.576      | 30.421       | 40.833      | 46.41        | FALSE     |
| Glycerol-3-phosphate phosphatase OS=Mus musculus GN=Pgp PE=1 SV=1                                  | Q8CHP8           | Pgp          | 35 kDa  | 0            | 0           | 0            | 0.81665     | 1.7189       | FALSE     |
| Glycine-tRNA ligase OS=Mus musculus GN=Gars PE=1 SV=1                                              | Q9CZD3           | Gars         | 82 kDa  | 0            | 4.7936      | 0            | 11.025      | 7.7349       | FALSE     |
| Glycogen [starch] synthase, muscle OS=Mus musculus GN=Gys1 PE=1 SV=2                               | Q9Z1E4           | Gys1         | 84 kDa  | 0            | 0           | 0            | 0.81665     | 1.2892       | FALSE     |
| Glycogen synthase kinase-3 alpha OS=Mus musculus GN=Gsk3a PE=1 SV=2                                | Q2NL51           | Gsk3a        | 52 kDa  | 0            | 0           | 0            | 1.225       | 1.2892       | FALSE     |
| Glycogen synthase kinase-3 beta OS=Mus musculus GN=Gsk3b PE=1 SV=1                                 | E9QAQ5 (+2)      | Gsk3b        | 48 kDa  | 0            | 0           | 0            | 1.6333      | 1.7189       | FALSE     |
| Glycogenin (Fragment) OS=Mus musculus GN=Gyg PE=1 SV=1                                             | V9GX26           | Gyg          | 41 kDa  | 0            | 0           | 0            | 0.81665     | 0.85944      | FALSE     |
| Glycylpeptide N-tetradecanoyltransferase 1 OS=Mus musculus GN=Nmt1 PE=1 SV=1                       | O70310 (+1)      | Nmt1         | 57 kDa  | 0            | 0           | 0            | 5.3082      | 4.7269       | FALSE     |
| Glycylpeptide N-tetradecanoyltransferase 2 OS=Mus musculus GN=Nmt2 PE=1 SV=1                       | O70311 (+1)      | Nmt2         | 60 kDa  | 0            | 0           | 0            | 0           | 2.1486       | FALSE     |
| Glyoxalase domain-containing protein 4 OS=Mus musculus GN=Glod4 PE=1 SV=1                          | Q9CPV4           | Glod4        | 33 kDa  | 0            | 0           | 0            | 4.4916      | 5.5863       | FALSE     |
| Glyoxylate reductase/hydroxypyruvate reductase OS=Mus musculus GN=Grhpr PE=1 SV=1                  | Q3T9Z2 (+1)      | Grhpr        | 35 kDa  | 0            | 0           | 0            | 1.225       | 1.7189       | FALSE     |
| GMP reductase 1 OS=Mus musculus GN=Gmpr PE=1 SV=1                                                  | Q9DCZ1           | Gmpr         | 37 kDa  | 0            | 0           | 0            | 0           | 0.85944      | FALSE     |
| GMP reductase 2 OS=Mus musculus GN=Gmpr2 PE=1 SV=2                                                 | Q99L27           | Gmpr2        | 38 kDa  | 0            | 0           | 0            | 0           | 1.7189       | FALSE     |
| Golgi integral membrane protein 4 OS=Mus musculus GN=Golim4 PE=1 SV=1                              | D3YVW2           | Golim4       | 80 kDa  | 0            | 0           | 0            | 1.225       | 0            | FALSE     |
| Golgi reassembly stacking protein 2, isoform CRA_d OS=Mus musculus GN=Gorasp2 PE=1 SV=1            | A2AT19 (+3)      | Gorasp2      | 45 kDa  | 0            | 0           | 0            | 2.8583      | 3.008        | FALSE     |
| Golgi to ER traffic protein 4 homolog OS=Mus musculus GN=Get4 PE=1 SV=2                            | Q9D1H7           | Get4         | 37 kDa  | 0            | 0           | 0            | 1.225       | 1.2892       | FALSE     |
| Golgi-associated plant pathogenesis-related protein 1 OS=Mus musculus GN=Glipr2 PE=1 SV=3          | Q9CYL5           | Glipr2       | 17 kDa  | 0            | 0           | 0            | 0.81665     | 0            | FALSE     |
| Golgi-specific brefeldin A-resistance factor 1 OS=Mus musculus GN=Gbf1 PE=1 SV=1                   | Q6DFZ1           | Gbf1         | 207 kDa | 0            | 0           | 0            | 1.225       | 1.7189       | FALSE     |
| Granulins OS=Mus musculus GN=Grn PE=1 SV=2                                                         | P28798 (+9)      | Grn          | 63 kDa  | 0            | 0           | 0            | 2.8583      | 1.7189       | FALSE     |
| Growth factor receptor bound protein 2, isoform CRA_b OS=Mus musculus GN=Grb2 PE=2 SV=1            | Q3U5I5 (+1)      | Grb2         | 25 kDa  | 0            | 0           | 0            | 0.81665     | 1.2892       | FALSE     |
| Growth factor receptor-bound protein 10 OS=Mus musculus GN=Grb10 PE=1 SV=2                         | Q60760           | Grb10        | 71 kDa  | 0            | 0           | 0            | 1.6333      | 0            | FALSE     |
| Growth hormone-inducible transmembrane protein OS=Mus musculus GN=Ghitm PE=1 SV=1                  | Q91VC9           | Ghitm        | 37 kDa  | 0            | 0           | 0            | 1.225       | 0            | FALSE     |
| Grwd1 protein (Fragment) OS=Mus musculus GN=Grwd1 PE=2 SV=1                                        | Q5XJZ3 (+2)      | Grwd1        | 49 kDa  | 0            | 0           | 0            | 0.81665     | 0            | FALSE     |
| GTP-binding protein 1 OS=Mus musculus GN=Gtpbp1 PE=1 SV=2                                          | O08582           | Gtpbp1       | 72 kDa  | 0            | 0           | 0            | 2.0416      | 2.5783       | FALSE     |
| GTPase HRas OS=Mus musculus GN=Hras PE=1 SV=2                                                      | Q61411           | Hras         | 21 kDa  | 0            | 0           | 0            | 1.225       | 0.85944      | FALSE     |
| GTPase-activating protein and VPS9 domain-containing protein 1 OS=Mus musculus GN=Gapvd1           | Q6PAR5           | Gapvd1       | 162 kDa | 0            | 0           | 0            | 1.6333      | 0            | FALSE     |
| Guanine monophosphate synthetase OS=Mus musculus GN=Gmps PE=1 SV=1                                 | B2RRH9 (+1)      | Gmps         | 77 kDa  | 0            | 0           | 0            | 6.5332      | 8.5944       | FALSE     |
| Guanine nucleotide binding protein, alpha 11 OS=Mus musculus GN=Gna11 PE=2 SV=1                    | Q91X95           | Gna11        | 42 kDa  | 0            | 0           | 0            | 1.225       | 1.2892       | FALSE     |
| Guanine nucleotide-binding protein G(I)/G(S)/G(T) subunit beta-1 OS=Mus musculus GN=Gnb1 PE=1 SV=1 | P62874 (+2)      | Gnb1         | 37 kDa  | 0            | 0           | 0            | 4.4916      | 2.5783       | FALSE     |
| Guanine nucleotide-binding protein G(I)/G(S)/G(T) subunit beta-2 OS=Mus musculus GN=Gnb2 PE=1 SV=1 | P62880 (+1)      | Gnb2         | 37 kDa  | 0            | 0           | 0            | 5.3082      | 3.4377       | FALSE     |

| Identified Proteins (2666)                                                                  | Accession Number | Alternate ID | MW      | VPSko-biotin | ctrl-biotin | VPSoe-biotin | ctrl lysate | VPSoe lysate | enriched? |
|---------------------------------------------------------------------------------------------|------------------|--------------|---------|--------------|-------------|--------------|-------------|--------------|-----------|
| Guanine nucleotide-binding protein G(k) subunit alpha OS=Mus musculus GN=Gnai3 PE=1 SV=3    | Q9DC51           | Gnai3        | 41 kDa  | 0            | 0           | 0            | 2.45        | 1.7189       | FALSE     |
| Guanine nucleotide-binding protein G(s) subunit alpha isoforms XLas OS=Mus musculus GN=Gnas | Q6R0H7           | Gnas         | 122 kDa | 0            | 0           | 0            | 2.0416      | 2.1486       | FALSE     |
| Guanine nucleotide-binding protein subunit beta-4 OS=Mus musculus GN=Gnb4 PE=1 SV=4         | P29387 (+2)      | Gnb4         | 37 kDa  | 0            | 0           | 0            | 2.8583      | 0            | FALSE     |
| Guanine nucleotide-binding protein-like 1 OS=Mus musculus GN=Gnl1 PE=1 SV=4                 | P36916           | Gnl1         | 69 kDa  | 0            | 0           | 0            | 3.6749      | 2.5783       | FALSE     |
| Guanylate-binding protein 2 OS=Mus musculus GN=Gbp2 PE=1 SV=1                               | Q9Z0E6           | Gbp2         | 67 kDa  | 0            | 0           | 0            | 1.225       | 0            | FALSE     |
| Guanylate-binding protein 4 OS=Mus musculus GN=Gbp4 PE=1 SV=1                               | Q61107           | Gbp4         | 71 kDa  | 0            | 0           | 0            | 2.45        | 0            | FALSE     |
| H1 histone family, member X OS=Mus musculus GN=H1fx PE=1 SV=1                               | Q80ZM5           | H1fx         | 20 kDa  | 0            | 0           | 0            | 0           | 0.85944      | FALSE     |
| HBS1-like protein OS=Mus musculus GN=Hbs1l PE=1 SV=1                                        | Q3TGM7 (+1)      | Hbs1l        | 75 kDa  | 0            | 0           | 0            | 1.225       | 0.85944      | FALSE     |
| Heat shock 70 kDa protein 14 OS=Mus musculus GN=Hspa14 PE=1 SV=2                            | Q99M31           | Hspa14       | 55 kDa  | 0            | 0           | 0            | 3.6749      | 4.2972       | FALSE     |
| Heat shock 70 kDa protein 1B OS=Mus musculus GN=Hspa1b PE=1 SV=3                            | P17879           | Hspa1b       | 70 kDa  | 0            | 0           | 0            | 10.208      | 9.0241       | FALSE     |
| Heat shock 70 kDa protein 4L OS=Mus musculus GN=Hspa4l PE=1 SV=2                            | P48722           | Hspa4l       | 94 kDa  | 0            | 0           | 0            | 4.8999      | 6.8755       | FALSE     |
| Heat shock protein 105 kDa OS=Mus musculus GN=Hsph1 PE=1 SV=2                               | Q61699           | Hsph1        | 96 kDa  | 0            | 0           | 3.5789       | 11.433      | 13.321       | FALSE     |
| Helicase with zinc finger domain 2 OS=Mus musculus GN=Helz2 PE=1 SV=1                       | E9QAM5           | Helz2        | 332 kDa | 0            | 0           | 0            | 2.45        | 0            | FALSE     |
| Heme oxygenase 1 OS=Mus musculus GN=Hmox1 PE=1 SV=1                                         | P14901 (+1)      | Hmox1        | 33 kDa  | 0            | 0           | 0            | 0.81665     | 0            | FALSE     |
| Heme oxygenase 2 OS=Mus musculus GN=Hmox2 PE=1 SV=1                                         | O70252 (+2)      | Hmox2        | 36 kDa  | 0            | 0           | 0            | 1.6333      | 1.7189       | FALSE     |
| Heme-binding protein 2 OS=Mus musculus GN=Hebp2 PE=1 SV=1                                   | Q9WU63           | Hebp2        | 23 kDa  | 0            | 0           | 0            | 0           | 0.85944      | FALSE     |
| Heparan-alpha-glucosaminide N-acetyltransferase OS=Mus musculus GN=Hgsnat PE=1 SV=2         | Q3UDW8           | Hgsnat       | 73 kDa  | 0            | 0           | 0            | 0           | 0.85944      | FALSE     |
| Hepatocyte growth factor-regulated tyrosine kinase substrate OS=Mus musculus GN=Hgs PE=1    | B1ATZ0 (+1)      | Hgs          | 86 kDa  | 0            | 0           | 0            | 1.6333      | 2.5783       | FALSE     |
| Hepatoma-derived growth factor OS=Mus musculus GN=Hdgf PE=1 SV=2                            | P51859           | Hdgf         | 26 kDa  | 0            | 0           | 0            | 4.4916      | 5.1566       | FALSE     |
| Hepatoma-derived growth factor-related protein 2 OS=Mus musculus GN=Hdgfl2 PE=1 SV=1        | Q3UMU9           | Hdgfl2       | 74 kDa  | 0            | 0           | 0            | 0.81665     | 1.7189       | FALSE     |
| Heterogeneous nuclear ribonucleoprotein A3 OS=Mus musculus GN=Hnrnpa3 PE=1 SV=1             | A2AL12 (+4)      | Hnrnpa3      | 34 kDa  | 0            | 0           | 0            | 2.8583      | 2.1486       | FALSE     |
| Heterogeneous nuclear ribonucleoprotein D-like OS=Mus musculus GN=Hnrnpdl PE=1 SV=1         | Q9Z130           | Hnrnpdl      | 34 kDa  | 0            | 0           | 0            | 2.0416      | 0            | FALSE     |
| Heterogeneous nuclear ribonucleoprotein D0 OS=Mus musculus GN=Hnrnpd PE=1 SV=2              | Q60668           | Hnrnpd       | 38 kDa  | 0            | 0           | 0            | 4.0833      | 5.1566       | FALSE     |
| Heterogeneous nuclear ribonucleoprotein H2 OS=Mus musculus GN=Hnrnp2 PE=1 SV=1              | P70333           | Hnrnp2       | 49 kDa  | 0            | 0           | 0            | 2.45        | 3.4377       | FALSE     |
| Heterogeneous nuclear ribonucleoprotein K OS=Mus musculus GN=Hnrnpk PE=1 SV=1               | P61979 (+1)      | Hnrnpk       | 51 kDa  | 9.2077       | 6.3914      | 8.9474       | 11.841      | 9.8835       | FALSE     |
| Heterogeneous nuclear ribonucleoprotein L (Fragment) OS=Mus musculus GN=Hnrnpl PE=1 SV=1    | G5E924 (+1)      | Hnrnpl       | 67 kDa  | 0            | 0           | 0            | 2.0416      | 0.85944      | FALSE     |
| Heterogeneous nuclear ribonucleoprotein L-like OS=Mus musculus GN=Hnrnp1l PE=1 SV=3         | Q921F4           | Hnrnp1l      | 64 kDa  | 0            | 0           | 0            | 2.45        | 3.008        | FALSE     |
| Heterogeneous nuclear ribonucleoprotein U-like protein 1 OS=Mus musculus GN=Hnrnpul1 PE=1   | Q8VDM6           | Hnrnpul1     | 96 kDa  | 0            | 0           | 0            | 1.6333      | 1.7189       | FALSE     |
| Hexokinase 1, isoform CRA_d OS=Mus musculus GN=Hk1 PE=2 SV=1                                | Q6GQU1           | Hk1          | 102 kDa | 0            | 0           | 0            | 10.208      | 9.0241       | FALSE     |
| High affinity cationic amino acid transporter 1 OS=Mus musculus GN=Slc7a1 PE=1 SV=1         | Q09143 (+2)      | Slc7a1       | 67 kDa  | 0            | 0           | 0            | 0.81665     | 0.85944      | FALSE     |
| High density lipoprotein (HDL) binding protein, isoform CRA_d OS=Mus musculus GN=Hdlbp PE=1 | Q3U427 (+1)      | Hdlbp        | 142 kDa | 0            | 3.1957      | 3.5789       | 11.433      | 7.7349       | FALSE     |
| High mobility group box 3 OS=Mus musculus GN=Hmgb3 PE=1 SV=1                                | Q544R9 (+1)      | Hmgb3        | 23 kDa  | 0            | 0           | 0            | 0           | 1.7189       | FALSE     |
| Hippocalcin-like protein 1 OS=Mus musculus GN=Hpcal1 PE=1 SV=2                              | P62748           | Hpcal1       | 22 kDa  | 0            | 0           | 0            | 1.225       | 3.008        | FALSE     |
| HIRA-interacting protein 3 OS=Mus musculus GN=Hirip3 PE=1 SV=1                              | Q8BLH7           | Hirip3       | 65 kDa  | 0            | 0           | 0            | 0           | 1.2892       | FALSE     |
| Histone acetyltransferase type B catalytic subunit OS=Mus musculus GN=Hat1 PE=1 SV=1        | A2ATU9 (+1)      | Hat1         | 50 kDa  | 0            | 0           | 0            | 1.225       | 2.5783       | FALSE     |
| Histone deacetylase OS=Mus musculus GN=Hdac2 PE=1 SV=1                                      | A0A0R4J008 (+1)  | Hdac2        | 55 kDa  | 0            | 0           | 0            | 0           | 2.1486       | FALSE     |
| Histone deacetylase OS=Mus musculus GN=Hdac7 PE=1 SV=1                                      | E9PXXW1 (+2)     | Hdac7        | 97 kDa  | 0            | 0           | 0            | 0           | 0.85944      | FALSE     |
| Histone H1.2 OS=Mus musculus GN=Hist1h1c PE=1 SV=2                                          | P15864 (+2)      | Hist1h1c     | 21 kDa  | 0            | 0           | 0            | 2.45        | 3.008        | FALSE     |
| Histone H1.5 OS=Mus musculus GN=Hist1h1b PE=1 SV=2                                          | P43276 (+1)      | Hist1h1b     | 23 kDa  | 0            | 0           | 0            | 1.225       | 0.85944      | FALSE     |
| Histone PARylation factor 1 OS=Mus musculus GN=Hpf1 PE=1 SV=1                               | Q8CFE2           | Hpf1         | 39 kDa  | 0            | 0           | 0            | 1.225       | 1.2892       | FALSE     |
| Histone-arginine methyltransferase CARM1 OS=Mus musculus GN=Carm1 PE=1 SV=2                 | Q9WVG6           | Carm1        | 66 kDa  | 0            | 0           | 0            | 2.45        | 2.1486       | FALSE     |
| Histone-binding protein RBBP4 OS=Mus musculus GN=Rbbp4 PE=1 SV=5                            | Q60972           | Rbbp4        | 48 kDa  | 0            | 0           | 0            | 2.45        | 0            | FALSE     |
| Histone-lysine N-methyltransferase SETD7 OS=Mus musculus GN=Setd7 PE=1 SV=2                 | Q8VHL1           | Setd7        | 41 kDa  | 0            | 0           | 0            | 0           | 2.1486       | FALSE     |
| HIV Tat-specific factor 1 homolog OS=Mus musculus GN=Htatsf1 PE=1 SV=1                      | Q8BGC0           | Htatsf1      | 86 kDa  | 0            | 0           | 0            | 0.81665     | 0.85944      | FALSE     |
| HN1-like protein OS=Mus musculus GN=Jpt2 PE=1 SV=1                                          | Q3TM10 (+2)      | Jpt2         | 20 kDa  | 0            | 0           | 0            | 1.225       | 1.7189       | FALSE     |
| Host cell factor 1 OS=Mus musculus GN=Hcfc1 PE=1 SV=2                                       | Q61191           | Hcfc1        | 210 kDa | 0            | 0           | 0            | 2.8583      | 2.5783       | FALSE     |
| Hsp90 co-chaperone Cdc37 OS=Mus musculus GN=Cdc37 PE=1 SV=1                                 | Q61081           | Cdc37        | 45 kDa  | 0            | 0           | 3.5789       | 4.4916      | 4.2972       | FALSE     |
| HSPB1-associated protein 1 OS=Mus musculus GN=Hspbap1 PE=1 SV=2                             | Q8BK58           | Hspbap1      | 54 kDa  | 0            | 0           | 0            | 0           | 1.2892       | FALSE     |
| Hydroxyacyl-coenzyme A dehydrogenase, mitochondrial OS=Mus musculus GN=Hadh PE=1 SV=2       | Q61425           | Hadh         | 34 kDa  | 0            | 0           | 0            | 1.225       | 2.5783       | FALSE     |
| Hydroxyacylglutathione hydrolase, mitochondrial OS=Mus musculus GN=Hagh PE=1 SV=1           | A0A0R4J052 (+3)  | Hagh         | 29 kDa  | 0            | 0           | 0            | 0.81665     | 0.85944      | FALSE     |
| Hydroxymethylglutaryl-CoA synthase, cytoplasmic OS=Mus musculus GN=Hmgcs1 PE=1 SV=1         | Q8JZK9 (+1)      | Hmgcs1       | 58 kDa  | 0            | 0           | 0            | 4.0833      | 2.1486       | FALSE     |



| Identified Proteins (2666)                                                                                 | Accession Number | Alternate ID | MW      | VPSko-biotin | ctrl-biotin | VPSoe-biotin | ctrl lysate | VPSoe lysate | enriched? |
|------------------------------------------------------------------------------------------------------------|------------------|--------------|---------|--------------|-------------|--------------|-------------|--------------|-----------|
| Hypoxia up-regulated protein 1 OS=Mus musculus GN=Hyou1 PE=1 SV=1                                          | Q9JKR6           | Hyou1        | 111 kDa | 0            | 3.1957      | 3.5789       | 9.7998      | 7.7349       | FALSE     |
| Immunity related GTPase family B member 6 homologue allele 2 OS=Mus musculus domesticus GN=A0A1G5SLN0 (+3) | OTTMUSWSBG       |              | 47 kDa  | 0            | 0           | 0            | 2.45        | 0            | FALSE     |
| Immunity-related GTPase family member m3 OS=Mus musculus molossinus GN=Irgm3 PE=4 SV=1                     | U5NG76           | Irgm3        | 46 kDa  | 0            | 0           | 0            | 0.81665     | 0            | FALSE     |
| Immunoglobulin-binding protein 1 OS=Mus musculus GN=Igbp1 PE=1 SV=1                                        | Q61249           | Igbp1        | 39 kDa  | 0            | 0           | 0            | 0.81665     | 0.85944      | FALSE     |
| Importin subunit alpha-7 OS=Mus musculus GN=Kpna6 PE=1 SV=2                                                | O35345 (+2)      | Kpna6        | 60 kDa  | 0            | 0           | 0            | 2.45        | 0.85944      | FALSE     |
| Importin-7 OS=Mus musculus GN=Ipo7 PE=1 SV=2                                                               | Q9EPL8           | Ipo7         | 119 kDa | 0            | 0           | 0            | 4.0833      | 4.7269       | FALSE     |
| Importin-9 OS=Mus musculus GN=Ipo9 PE=1 SV=1                                                               | E9QKZ2 (+1)      | Ipo9         | 116 kDa | 0            | 0           | 0            | 3.6749      | 2.1486       | FALSE     |
| Inorganic pyrophosphatase 2, mitochondrial OS=Mus musculus GN=Ppa2 PE=1 SV=1                               | Q91VM9           | Ppa2         | 38 kDa  | 0            | 0           | 0            | 1.225       | 2.5783       | FALSE     |
| Inosine triphosphate pyrophosphatase OS=Mus musculus GN=Itpa PE=1 SV=1                                     | Q60130 (+1)      | Itpa         | 22 kDa  | 0            | 0           | 0            | 3.6749      | 3.4377       | FALSE     |
| Inosine-5'-monophosphate dehydrogenase 2 OS=Mus musculus GN=Impdh2 PE=1 SV=2                               | P24547 (+2)      | Impdh2       | 56 kDa  | 3.6831       | 0           | 0            | 10.616      | 9.8835       | FALSE     |
| Inosine-5'-monophosphate dehydrogenase OS=Mus musculus GN=Impdh1 PE=1 SV=2                                 | F7DEU6 (+1)      | Impdh1       | 58 kDa  | 0            | 0           | 0            | 0.81665     | 1.7189       | FALSE     |
| Inositol 1,4,5-trisphosphate receptor type 3 OS=Mus musculus GN=Itp3 PE=1 SV=3                             | P70227           | Itp3         | 304 kDa | 0            | 0           | 0            | 5.7166      | 6.8755       | FALSE     |
| Inositol polyphosphate 1-phosphatase OS=Mus musculus GN=Inpp1 PE=1 SV=2                                    | P49442           | Inpp1        | 43 kDa  | 0            | 0           | 0            | 0.81665     | 0.85944      | FALSE     |
| Inositol-1-monophosphatase OS=Mus musculus GN=Impa2 PE=2 SV=1                                              | Q3TAU6 (+3)      | Impa2        | 32 kDa  | 0            | 0           | 0            | 0.81665     | 0.85944      | FALSE     |
| Insulin-degrading enzyme OS=Mus musculus GN=Ide PE=1 SV=1                                                  | Q9JHR7           | Ide          | 118 kDa | 0            | 0           | 0            | 4.4916      | 3.8675       | FALSE     |
| Insulin-like growth factor 2 mRNA-binding protein 1 OS=Mus musculus GN=Igf2bp1 PE=1 SV=1                   | O88477           | Igf2bp1      | 63 kDa  | 0            | 0           | 0            | 3.6749      | 3.8675       | FALSE     |
| Insulin-like growth factor binding protein 7 OS=Mus musculus GN=Igfbp7 PE=2 SV=1                           | A0A5E1 (+3)      | Igfbp7       | 29 kDa  | 0            | 0           | 0            | 2.0416      | 1.2892       | FALSE     |
| Integrin-associated protein OS=Mus musculus GN=Cd47 PE=2 SV=1                                              | E5Q371 (+2)      | Cd47         | 33 kDa  | 0            | 0           | 0            | 1.225       | 0.85944      | FALSE     |
| Integrin-linked kinase-associated serine/threonine phosphatase 2C OS=Mus musculus GN=Ilkap                 | Q8R0F6           | Ilkap        | 43 kDa  | 0            | 0           | 0            | 0           | 1.2892       | FALSE     |
| Integrin-linked protein kinase OS=Mus musculus GN=Ilk PE=1 SV=2                                            | O55222           | Ilk          | 51 kDa  | 0            | 0           | 0            | 3.2666      | 3.8675       | FALSE     |
| Interferon gamma inducible protein 47 OS=Mus musculus molossinus GN=Irgd PE=4 SV=1                         | U5NG85           | Irgd         | 47 kDa  | 0            | 0           | 0            | 3.2666      | 0            | FALSE     |
| Interferon regulatory factor 2-binding protein 2 OS=Mus musculus GN=Irf2bp2 PE=1 SV=1                      | E9Q1P8           | Irf2bp2      | 59 kDa  | 0            | 0           | 0            | 2.0416      | 1.7189       | FALSE     |
| Interferon regulatory factor 9 OS=Mus musculus GN=Irf9 PE=1 SV=1                                           | E9Q8M6 (+2)      | Irf9         | 47 kDa  | 0            | 0           | 0            | 0.81665     | 0            | FALSE     |
| Interferon-gamma-inducible GTPase Ifgga1 protein OS=Mus musculus GN=Ilgp1 PE=1 SV=1                        | J7NXX8 (+2)      | Ilgp1        | 48 kDa  | 0            | 0           | 0            | 2.0416      | 0            | FALSE     |
| Interferon-induced 35 kDa protein homolog OS=Mus musculus GN=Ifi35 PE=1 SV=3                               | Q9D8C4           | Ifi35        | 32 kDa  | 0            | 0           | 0            | 0.81665     | 0            | FALSE     |
| Interferon-induced protein 44 OS=Mus musculus GN=Ifi44 PE=2 SV=1                                           | Q8BV66           | Ifi44        | 48 kDa  | 0            | 0           | 0            | 0.81665     | 0            | FALSE     |
| Interferon-induced protein with tetratricopeptide repeats 3 OS=Mus musculus GN=Ifit3 PE=1 SV=1             | Q5FW82 (+1)      | Ifit3        | 47 kDa  | 0            | 0           | 0            | 2.0416      | 0            | FALSE     |
| Interferon-inducible double-stranded RNA-dependent protein kinase activator A OS=Mus musculus              | Q9WTX2           | Prkra        | 34 kDa  | 0            | 0           | 0            | 2.0416      | 1.7189       | FALSE     |
| Interleukin enhancer-binding factor 3 OS=Mus musculus GN=Ilf3 PE=1 SV=1                                    | A0A1L1STE4 (+3)  | Ilf3         | 97 kDa  | 0            | 0           | 0            | 0.81665     | 0.85944      | FALSE     |
| Intraflagellar transport protein 22 homolog OS=Mus musculus GN=Ift22 PE=1 SV=1                             | Q9DAI2           | Ift22        | 21 kDa  | 0            | 0           | 0            | 0.81665     | 0            | FALSE     |
| Inverted formin-2 OS=Mus musculus GN=Inf2 PE=1 SV=1                                                        | Q0GNC1           | Inf2         | 139 kDa | 0            | 0           | 0            | 1.225       | 1.7189       | FALSE     |
| Iron-sulfur cluster assembly 2 homolog, mitochondrial OS=Mus musculus GN=Isca2 PE=1 SV=2                   | Q9DCB8           | Isca2        | 17 kDa  | 0            | 0           | 0            | 0.81665     | 0            | FALSE     |
| Iso citrate dehydrogenase [NAD] subunit alpha, mitochondrial OS=Mus musculus GN=Idh3a PE=1 SV=1            | Q9D6R2           | Idh3a        | 40 kDa  | 0            | 3.1957      | 0            | 4.8999      | 4.2972       | FALSE     |
| Iso citrate dehydrogenase [NAD] subunit gamma 1, mitochondrial OS=Mus musculus GN=Idh3g PE=1 SV=1          | P70404 (+2)      | Idh3g        | 43 kDa  | 0            | 0           | 0            | 3.6749      | 3.008        | FALSE     |
| Iso citrate dehydrogenase [NADP] cytoplasmic OS=Mus musculus GN=Idh1 PE=1 SV=2                             | O88844 (+2)      | Idh1         | 47 kDa  | 0            | 0           | 0            | 4.8999      | 6.4458       | FALSE     |
| Iso citrate dehydrogenase [NADP], mitochondrial OS=Mus musculus GN=Idh2 PE=1 SV=3                          | P54071           | Idh2         | 51 kDa  | 0            | 4.7936      | 10.737       | 11.025      | 14.181       | FALSE     |
| Isoleucine-tRNA ligase, mitochondrial OS=Mus musculus GN=Iars2 PE=1 SV=1                                   | Q8BIJ6           | Iars2        | 113 kDa | 0            | 0           | 0            | 2.0416      | 2.1486       | FALSE     |
| Isopenentenyl-diphosphate Delta-isomerase 1 OS=Mus musculus GN=Idi1 PE=1 SV=1                              | P58044           | Idi1         | 26 kDa  | 0            | 0           | 0            | 0           | 1.2892       | FALSE     |
| Isovaleryl-CoA dehydrogenase, mitochondrial OS=Mus musculus GN=Ivd PE=1 SV=1                               | Q9JHI5           | Ivd          | 46 kDa  | 0            | 0           | 0            | 1.6333      | 1.7189       | FALSE     |
| IST1 homolog OS=Mus musculus GN=Ist1 PE=1 SV=1                                                             | Q9CX00           | Ist1         | 39 kDa  | 0            | 0           | 0            | 0           | 0.85944      | FALSE     |
| JNK-interacting leucine zipper protein long form OS=Mus musculus GN=Spag9 PE=2 SV=1                        | B8X349 (+1)      | Spag9        | 146 kDa | 0            | 0           | 0            | 1.6333      | 0            | FALSE     |
| Junctional adhesion molecule A OS=Mus musculus GN=F11r PE=1 SV=2                                           | O88792           | F11r         | 32 kDa  | 0            | 0           | 0            | 0           | 0.85944      | FALSE     |
| Jupiter microtubule associated homolog 1 OS=Mus musculus GN=JPT1 PE=1 SV=3                                 | P97825           | JPT1         | 16 kDa  | 0            | 0           | 0            | 2.45        | 1.7189       | FALSE     |
| KDEL (Lys-Asp-Glu-Leu) containing 2, isoform CRA_b OS=Mus musculus GN=Kdelc2 PE=1 SV=1                     | G5E897 (+1)      | Kdelc2       | 58 kDa  | 0            | 0           | 0            | 0.81665     | 0            | FALSE     |
| KDEL motif-containing protein 1 OS=Mus musculus GN=Kdelc1 PE=1 SV=1                                        | Q9JHP7           | Kdelc1       | 58 kDa  | 0            | 0           | 0            | 2.8583      | 2.5783       | FALSE     |
| Kelch domain containing 4, isoform CRA_a OS=Mus musculus GN=Klhdc4 PE=1 SV=1                               | G3X961           | Klhdc4       | 65 kDa  | 0            | 0           | 0            | 2.8583      | 2.5783       | FALSE     |
| Kelch-like protein 22 OS=Mus musculus GN=Klhl22 PE=1 SV=1                                                  | H9KV05 (+1)      | Klhl22       | 74 kDa  | 0            | 0           | 0            | 0.81665     | 0.85944      | FALSE     |
| Kinectin OS=Mus musculus GN=Ktn1 PE=1 SV=1                                                                 | Q61595           | Ktn1         | 153 kDa | 0            | 0           | 0            | 3.2666      | 3.008        | FALSE     |
| Kinesin family member 13B OS=Mus musculus GN=Kif13b PE=1 SV=1                                              | E9Q4K7           | Kif13b       | 205 kDa | 0            | 0           | 0            | 0.81665     | 1.2892       | FALSE     |
| Kinesin light chain 1 OS=Mus musculus GN=Klc1 PE=1 SV=1                                                    | Q8CD76           | Klc1         | 69 kDa  | 0            | 0           | 0            | 2.0416      | 1.7189       | FALSE     |
| Kinesin-1 heavy chain OS=Mus musculus GN=Kif5b PE=1 SV=3                                                   | Q61768           | Kif5b        | 110 kDa | 3.6831       | 3.1957      | 0            | 6.5332      | 4.2972       | FALSE     |

| Identified Proteins (2666)                                                                       | Accession Number | Alternate ID | MW      | VPSko-biotin | ctrl-biotin | VPSoe-biotin | ctrl lysate | VPSoe lysate | enriched? |
|--------------------------------------------------------------------------------------------------|------------------|--------------|---------|--------------|-------------|--------------|-------------|--------------|-----------|
| Kinesin-like protein KIF11 OS=Mus musculus GN=Kif11 PE=1 SV=1                                    | Q6P9P6           | Kif11        | 118 kDa | 0            | 0           | 0            | 3.6749      | 3.4377       | FALSE     |
| Kinesin-like protein KIF15 OS=Mus musculus GN=Kif15 PE=1 SV=1                                    | Q6P9L6           | Kif15        | 160 kDa | 0            | 0           | 0            | 0.81665     | 0.85944      | FALSE     |
| Kinesin-like protein KIF1B OS=Mus musculus GN=Kif1b PE=1 SV=2                                    | Q60575           | Kif1b        | 204 kDa | 0            | 0           | 0            | 1.225       | 1.2892       | FALSE     |
| Kinesin-like protein KIF2A OS=Mus musculus GN=Kif2a PE=1 SV=2                                    | P28740           | Kif2a        | 80 kDa  | 0            | 0           | 0            | 4.0833      | 3.4377       | FALSE     |
| Kinesin-like protein OS=Mus musculus GN=Kif2c PE=2 SV=1                                          | Q8BU22 (+1)      | Kif2c        | 81 kDa  | 0            | 0           | 0            | 0           | 1.2892       | FALSE     |
| Kinesin-like protein OS=Mus musculus GN=Kifc1 PE=2 SV=1                                          | A0A068BFR6 (+1)  | Kifc1        | 74 kDa  | 0            | 0           | 0            | 0.81665     | 1.2892       | FALSE     |
| Kinetochore protein NDC80 homolog OS=Mus musculus GN=Ndc80 PE=1 SV=1                             | Q9D0F1           | Ndc80        | 74 kDa  | 0            | 0           | 0            | 0           | 0.85944      | FALSE     |
| Kinetochore-associated protein 1 OS=Mus musculus GN=Kntc1 PE=1 SV=2                              | Q8C3Y4           | Kntc1        | 250 kDa | 0            | 0           | 0            | 1.225       | 0            | FALSE     |
| L-lactate dehydrogenase B chain OS=Mus musculus GN=Ldhb PE=1 SV=2                                | P16125           | Ldhb         | 37 kDa  | 0            | 0           | 0            | 2.0416      | 0            | FALSE     |
| La-related protein 1 OS=Mus musculus GN=Larp1 PE=1 SV=3                                          | Q6ZQ58 (+1)      | Larp1        | 121 kDa | 0            | 3.1957      | 3.5789       | 4.4916      | 4.7269       | FALSE     |
| La-related protein 7 OS=Mus musculus GN=Larp7 PE=1 SV=2                                          | Q05CL8           | Larp7        | 65 kDa  | 0            | 0           | 0            | 1.225       | 2.1486       | FALSE     |
| Lactadherin OS=Mus musculus GN=Mfge8 PE=1 SV=3                                                   | P21956           | Mfge8        | 51 kDa  | 0            | 0           | 0            | 0.81665     | 0            | FALSE     |
| Lactoylglutathione lyase OS=Mus musculus GN=Glo1 PE=1 SV=1                                       | A5GZX3 (+1)      | Glo1         | 21 kDa  | 0            | 0           | 0            | 2.0416      | 1.7189       | FALSE     |
| Lamin-B receptor OS=Mus musculus GN=Lbr PE=1 SV=2                                                | Q3U9G9           | Lbr          | 71 kDa  | 0            | 0           | 0            | 1.225       | 1.2892       | FALSE     |
| Lamina-associated polypeptide 2, isoforms alpha/zeta OS=Mus musculus GN=Tmpo PE=1 SV=4           | Q61033           | Tmpo         | 75 kDa  | 0            | 0           | 0            | 0           | 2.1486       | FALSE     |
| Laminin subunit gamma-1 OS=Mus musculus GN=Lamc1 PE=1 SV=1                                       | F8VQJ3           | Lamc1        | 177 kDa | 0            | 0           | 5.3684       | 7.7582      | 9.4538       | FALSE     |
| Lanosterol 14-alpha demethylase OS=Mus musculus GN=Cyp51a1 PE=1 SV=1                             | Q8K0C4           | Cyp51a1      | 57 kDa  | 0            | 0           | 0            | 1.6333      | 0            | FALSE     |
| Lanosterol synthase OS=Mus musculus GN=Lss PE=1 SV=2                                             | Q8BLN5           | Lss          | 83 kDa  | 0            | 0           | 0            | 2.8583      | 2.1486       | FALSE     |
| Large subunit GTPase 1 homolog OS=Mus musculus GN=Lsg1 PE=1 SV=2                                 | Q3UM18           | Lsg1         | 73 kDa  | 0            | 0           | 0            | 0           | 1.2892       | FALSE     |
| Lariat debranching enzyme OS=Mus musculus GN=Dbr1 PE=1 SV=2                                      | Q923B1           | Dbr1         | 62 kDa  | 0            | 0           | 0            | 0.81665     | 0.85944      | FALSE     |
| Latexin OS=Mus musculus GN=Lxn PE=1 SV=2                                                         | P70202 (+1)      | Lxn          | 25 kDa  | 0            | 0           | 0            | 2.8583      | 3.008        | FALSE     |
| Lclat1 protein OS=Mus musculus GN=Lclat1 PE=1 SV=1                                               | B0V2Q7 (+1)      | Lclat1       | 44 kDa  | 0            | 0           | 0            | 0           | 0.85944      | FALSE     |
| Leiomodin-1 OS=Mus musculus GN=Lmod1 PE=1 SV=1                                                   | F8VPR1 (+1)      | Lmod1        | 66 kDa  | 0            | 0           | 0            | 1.6333      | 0            | FALSE     |
| Lethal(2) giant larvae protein homolog 1 OS=Mus musculus GN=Llg1 PE=1 SV=1                       | A0A0R4J0S4 (+1)  | Llg1         | 116 kDa | 0            | 0           | 0            | 1.6333      | 1.7189       | FALSE     |
| Leucine rich repeat containing 40, isoform CRA_a OS=Mus musculus GN=Lrrc40 PE=1 SV=1             | A0A0R4J0W6 (+1)  | Lrrc40       | 68 kDa  | 0            | 0           | 0            | 0.81665     | 0            | FALSE     |
| Leucine rich repeat containing 47 OS=Mus musculus GN=Lrrc47 PE=1 SV=1                            | B1AX98 (+2)      | Lrrc47       | 64 kDa  | 0            | 0           | 0            | 1.6333      | 1.2892       | FALSE     |
| Leucine-rich PPR motif-containing protein, mitochondrial OS=Mus musculus GN=Lrpprc PE=1 SV=2     | Q6PB66           | Lrpprc       | 157 kDa | 0            | 0           | 3.5789       | 6.9416      | 6.4458       | FALSE     |
| Leucine-rich repeat flightless-interacting protein 1 OS=Mus musculus GN=Lrrfp1 PE=1 SV=2         | Q3UZ39           | Lrrfp1       | 79 kDa  | 0            | 0           | 0            | 2.0416      | 2.5783       | FALSE     |
| Leucine-rich repeat-containing protein 58 OS=Mus musculus GN=Lrrc58 PE=2 SV=1                    | Q3UGP9           | Lrrc58       | 40 kDa  | 0            | 0           | 0            | 0.81665     | 1.7189       | FALSE     |
| Leucine-rich repeat-containing protein 59 OS=Mus musculus GN=Lrrc59 PE=1 SV=1                    | Q922Q8           | Lrrc59       | 35 kDa  | 3.6831       | 3.1957      | 3.5789       | 5.7166      | 6.0161       | FALSE     |
| Leucyl-tRNA synthetase OS=Mus musculus GN=Lars PE=2 SV=1                                         | Q7TSZ3 (+1)      | Lars         | 134 kDa | 3.6831       | 6.3914      | 0            | 11.025      | 10.313       | FALSE     |
| Leukotriene A-4 hydrolase OS=Mus musculus GN=Lta4h PE=1 SV=4                                     | P24527           | Lta4h        | 69 kDa  | 0            | 0           | 0            | 6.1249      | 4.2972       | FALSE     |
| LIM and cysteine-rich domains 1 OS=Mus musculus GN=Lmcd1 PE=1 SV=1                               | Q3TVW6 (+1)      | Lmcd1        | 41 kDa  | 0            | 0           | 0            | 1.6333      | 0            | FALSE     |
| LIM and senescent cell antigen-like-containing domain protein OS=Mus musculus GN=Lims1 PE=1 SV=1 | A0A0R4J005 (+3)  | Lims1        | 38 kDa  | 0            | 0           | 0            | 4.4916      | 2.1486       | FALSE     |
| LIM and SH3 protein 1, isoform CRA_b OS=Mus musculus GN=Lasp1 PE=1 SV=1                          | Q543N3 (+1)      | Lasp1        | 30 kDa  | 0            | 0           | 0            | 5.3082      | 5.1566       | FALSE     |
| LIM domain and actin-binding protein 1 OS=Mus musculus GN=Lima1 PE=1 SV=3                        | Q9ERGO           | Lima1        | 84 kDa  | 0            | 0           | 0            | 2.0416      | 1.2892       | FALSE     |
| Lipase maturation factor 2 OS=Mus musculus GN=Lmf2 PE=1 SV=1                                     | Q8C3X8           | Lmf2         | 80 kDa  | 0            | 0           | 0            | 1.6333      | 2.1486       | FALSE     |
| Lipoma-preferred partner homolog OS=Mus musculus GN=Lpp PE=1 SV=1                                | Q8BFW7           | Lpp          | 66 kDa  | 0            | 0           | 0            | 6.9416      | 5.1566       | FALSE     |
| Lipopolysaccharide-induced tumor necrosis factor-alpha factor homolog OS=Mus musculus GN=Litaf   | Q9JLJ0           | Litaf        | 17 kDa  | 0            | 0           | 0            | 0           | 0.85944      | FALSE     |
| Lon protease homolog, mitochondrial OS=Mus musculus GN=Lonp1 PE=1 SV=2                           | Q8CGK3           | Lonp1        | 106 kDa | 0            | 0           | 0            | 4.4916      | 5.5863       | FALSE     |
| Long-chain acyl-CoA synthetase OS=Mus musculus GN=Acsl6 PE=2 SV=1                                | A8IP90 (+3)      | Acsl6        | 78 kDa  | 0            | 0           | 0            | 0           | 0.85944      | FALSE     |
| Long-chain-fatty-acid-CoA ligase 1 OS=Mus musculus GN=Acsl1 PE=1 SV=1                            | D3Z041 (+1)      | Acsl1        | 78 kDa  | 0            | 0           | 0            | 2.0416      | 2.1486       | FALSE     |
| Long-chain-fatty-acid-CoA ligase 3 OS=Mus musculus GN=Acsl3 PE=1 SV=2                            | Q9CZW4           | Acsl3        | 80 kDa  | 0            | 0           | 0            | 0.81665     | 0.85944      | FALSE     |
| LRP chaperone MESD OS=Mus musculus GN=Mesd PE=1 SV=1                                             | Q9ERE7           | Mesd         | 25 kDa  | 0            | 0           | 0            | 0.81665     | 0.85944      | FALSE     |
| Luc7-like protein 3 OS=Mus musculus GN=Luc7l3 PE=1 SV=1                                          | Q5SUF2           | Luc7l3       | 51 kDa  | 0            | 0           | 0            | 1.6333      | 1.2892       | FALSE     |
| Lupus La protein homolog OS=Mus musculus GN=Ssb PE=1 SV=1                                        | P32067 (+2)      | Ssb          | 48 kDa  | 3.6831       | 3.1957      | 3.5789       | 5.7166      | 5.5863       | FALSE     |
| Lymphocyte antigen 6E (Fragment) OS=Mus musculus GN=Ly6e PE=1 SV=6                               | A0A087WNT2 (+6)  | Ly6e         | 12 kDa  | 0            | 0           | 0            | 1.225       | 1.2892       | FALSE     |
| Lymphocyte-specific helicase OS=Mus musculus GN=Hells PE=1 SV=2                                  | Q60848           | Hells        | 95 kDa  | 0            | 0           | 0            | 0.81665     | 1.2892       | FALSE     |
| Lymphokine-activated killer T-cell-originated protein kinase OS=Mus musculus GN=Pbk PE=1 SV=1    | Q9JJ78           | Pbk          | 37 kDa  | 0            | 0           | 0            | 2.45        | 1.7189       | FALSE     |
| Lysine-specific demethylase 3A OS=Mus musculus GN=Kdm3a PE=1 SV=1                                | Q6PCM1           | Kdm3a        | 148 kDa | 0            | 0           | 0            | 0           | 0.85944      | FALSE     |
| Lysophosphatidic acid phosphatase type 6 OS=Mus musculus GN=Acp6 PE=1 SV=1                       | Q8BP40           | Acp6         | 48 kDa  | 0            | 0           | 0            | 1.225       | 1.2892       | FALSE     |

| Identified Proteins (2666)                                                                                        | Accession Number | Alternate ID  | MW      | VPSko-biotin | ctrl-biotin | VPSoe-biotin | ctrl lysate | VPSoe lysate | enriched? |
|-------------------------------------------------------------------------------------------------------------------|------------------|---------------|---------|--------------|-------------|--------------|-------------|--------------|-----------|
| Lysosomal alpha-glucosidase OS=Mus musculus GN=Gaa PE=1 SV=2                                                      | P70699           | Gaa           | 106 kDa | 0            | 0           | 0            | 2.0416      | 1.7189       | FALSE     |
| Lysosomal Pro-X carboxypeptidase OS=Mus musculus GN=Prcp PE=1 SV=2                                                | Q7TMR0           | Prcp          | 55 kDa  | 0            | 0           | 0            | 1.225       | 2.1486       | FALSE     |
| Lysosomal protective protein OS=Mus musculus GN=Ctsa PE=1 SV=1                                                    | P16675 (+2)      | Ctsa          | 54 kDa  | 0            | 0           | 0            | 3.6749      | 2.1486       | FALSE     |
| Lysosome membrane protein 2 OS=Mus musculus GN=Scarb2 PE=1 SV=3                                                   | O35114           | Scarb2        | 54 kDa  | 0            | 0           | 0            | 0.81665     | 0            | FALSE     |
| Lysosome-associated membrane glycoprotein 1 OS=Mus musculus GN=Lamp1 PE=1 SV=2                                    | P11438 (+4)      | Lamp1         | 44 kDa  | 0            | 0           | 0            | 2.8583      | 1.7189       | FALSE     |
| m7GpppX diphosphatase OS=Mus musculus GN=Dcps PE=1 SV=1                                                           | Q9DAR7           | Dcps          | 39 kDa  | 0            | 0           | 0            | 3.6749      | 3.4377       | FALSE     |
| MAD2 mitotic arrest deficient-like 1 (Yeast) OS=Mus musculus GN=Mad2l1 PE=1 SV=1                                  | Q5HZH8 (+1)      | Mad2l1        | 24 kDa  | 0            | 0           | 0            | 0.81665     | 1.2892       | FALSE     |
| Maged2 protein OS=Mus musculus GN=Maged2 PE=1 SV=1                                                                | Q9ER67           | Maged2        | 65 kDa  | 0            | 0           | 0            | 2.8583      | 2.1486       | FALSE     |
| Magnesium transporter protein 1 OS=Mus musculus GN=Magt1 PE=1 SV=1                                                | A2ADH1 (+3)      | Magt1         | 42 kDa  | 0            | 0           | 0            | 0.81665     | 1.7189       | FALSE     |
| Mago nashi protein OS=Mus musculus GN=Magohb PE=1 SV=1                                                            | A0A023T778 (+2)  | Magohb        | 17 kDa  | 0            | 0           | 0            | 1.6333      | 1.2892       | FALSE     |
| Major facilitator superfamily domain-containing protein 10 OS=Mus musculus GN=Mfsd10 PE=1 SV=1                    | Q9D2V8           | Mfsd10        | 49 kDa  | 0            | 0           | 0            | 0.81665     | 0.85944      | FALSE     |
| Major vault protein OS=Mus musculus GN=Mvp PE=1 SV=1                                                              | E9Q3X0 (+2)      | Mvp           | 97 kDa  | 0            | 0           | 0            | 4.4916      | 4.7269       | FALSE     |
| Malectin OS=Mus musculus GN=Mlec PE=1 SV=2                                                                        | Q6ZQI3           | Mlec          | 32 kDa  | 0            | 0           | 0            | 3.2666      | 3.008        | FALSE     |
| Malonyl-CoA-acyl carrier protein transacylase, mitochondrial OS=Mus musculus GN=Mcat PE=1 SV=1                    | Q8R3F5           | Mcat          | 42 kDa  | 0            | 0           | 0            | 0           | 0.85944      | FALSE     |
| Mammalian ependymin-related protein 1 OS=Mus musculus GN=Epdr1 PE=1 SV=1                                          | Q99M71           | Epdr1         | 25 kDa  | 0            | 0           | 0            | 2.0416      | 1.2892       | FALSE     |
| Mammalian sterile twenty 3 kinase OS=Mus musculus GN=Stk24 PE=1 SV=1                                              | Q3U335 (+2)      | Stk24         | 48 kDa  | 0            | 0           | 0            | 2.0416      | 3.4377       | FALSE     |
| Manganese-transporting ATPase 13A1 OS=Mus musculus GN=Atp13a1 PE=1 SV=2                                           | Q9EPE9           | Atp13a1       | 132 kDa | 0            | 0           | 0            | 4.0833      | 4.7269       | FALSE     |
| Mannose-1-phosphate guanylttransferase beta OS=Mus musculus GN=Gmppb PE=1 SV=1                                    | Q8BTZ7           | Gmppb         | 40 kDa  | 0            | 0           | 0            | 2.0416      | 0.85944      | FALSE     |
| Mannose-6-phosphate isomerase OS=Mus musculus GN=Mpi PE=1 SV=1                                                    | Q3V100 (+1)      | Mpi           | 47 kDa  | 0            | 0           | 0            | 2.0416      | 1.2892       | FALSE     |
| Mannosyltransferase IV(V) OS=Mus musculus GN=Alg11 PE=2 SV=1                                                      | A0A077K846 (+1)  | Alg11         | 55 kDa  | 0            | 0           | 0            | 0.81665     | 0.85944      | FALSE     |
| MAP kinase-activated protein kinase 2 OS=Mus musculus GN=Mapkapk2 PE=1 SV=2                                       | P49138 (+1)      | Mapkapk2      | 44 kDa  | 0            | 0           | 0            | 1.6333      | 0            | FALSE     |
| MAP7 domain-containing protein 1 OS=Mus musculus GN=Map7d1 PE=1 SV=1                                              | A2AJI0 (+1)      | Map7d1        | 93 kDa  | 0            | 0           | 0            | 1.6333      | 1.2892       | FALSE     |
| MARCKS-related protein OS=Mus musculus GN=Marcks1 PE=1 SV=2                                                       | P28667           | Marcks1       | 20 kDa  | 0            | 0           | 0            | 2.0416      | 3.4377       | FALSE     |
| Masparidin OS=Mus musculus GN=Spg21 PE=1 SV=1                                                                     | A0A111SST5 (+2)  | Spg21         | 35 kDa  | 0            | 0           | 0            | 1.225       | 0.85944      | FALSE     |
| MCG113697 OS=Mus musculus GN=1110005A23Rik PE=1 SV=1                                                              | B2RXM7 (+2)      | 1110005A23Rik | 24 kDa  | 0            | 0           | 0            | 1.6333      | 1.2892       | FALSE     |
| MCG115964 OS=Mus musculus GN=Wdr70 PE=1 SV=1                                                                      | G3X934 (+1)      | Wdr70         | 73 kDa  | 0            | 0           | 0            | 1.225       | 1.7189       | FALSE     |
| MCG1196 OS=Mus musculus GN=Actr3 PE=1 SV=1                                                                        | Q3ULF7 (+1)      | Actr3         | 47 kDa  | 0            | 0           | 0            | 7.3499      | 4.7269       | FALSE     |
| MCG123182 OS=Mus musculus GN=Tsg101 PE=1 SV=1                                                                     | Q3UCW0 (+1)      | Tsg101        | 44 kDa  | 0            | 0           | 0            | 2.0416      | 1.2892       | FALSE     |
| MCG126220 OS=Mus musculus GN=Ywhaq PE=2 SV=1                                                                      | A3KML3 (+3)      | Ywhaq         | 28 kDa  | 0            | 0           | 0            | 4.0833      | 4.2972       | FALSE     |
| MCG127675 OS=Mus musculus GN=Ube2v2 PE=2 SV=1                                                                     | Q4VBX4 (+1)      | Ube2v2        | 16 kDa  | 0            | 0           | 0            | 2.0416      | 1.2892       | FALSE     |
| MCG127945, isoform CRA_a OS=Mus musculus GN=Tcerg1 PE=2 SV=1                                                      | Q3TH57 (+1)      | Tcerg1        | 124 kDa | 0            | 0           | 0            | 1.6333      | 1.7189       | FALSE     |
| MCG129075 OS=Mus musculus GN=Tmx4 PE=1 SV=1                                                                       | Q0P5W2 (+1)      | Tmx4          | 37 kDa  | 0            | 0           | 0            | 0.81665     | 0.85944      | FALSE     |
| MCG129810, isoform CRA_c OS=Mus musculus GN=Pdxdc1 PE=1 SV=1                                                      | A0A0R4J034       | Pdxdc1        | 87 kDa  | 0            | 0           | 0            | 4.4916      | 4.7269       | FALSE     |
| MCG130899 OS=Mus musculus GN=Pcnp PE=1 SV=1                                                                       | Q3UCC5 (+1)      | Pcnp          | 19 kDa  | 0            | 0           | 0            | 1.6333      | 2.1486       | FALSE     |
| MCG142017, isoform CRA_a OS=Mus musculus GN=Tmtc3 PE=1 SV=1                                                       | G5E8C4 (+1)      | Tmtc3         | 104 kDa | 0            | 0           | 0            | 1.6333      | 2.1486       | FALSE     |
| MCG14259, isoform CRA_a OS=Mus musculus GN=U2af1 PE=1 SV=1                                                        | Q14C24 (+1)      | U2af1         | 28 kDa  | 0            | 0           | 0            | 1.225       | 1.2892       | FALSE     |
| MCG16662 OS=Mus musculus GN=Srm PE=1 SV=1                                                                         | Q543H0 (+1)      | Srm           | 34 kDa  | 0            | 0           | 0            | 5.3082      | 7.7349       | FALSE     |
| MCG17262 OS=Mus musculus GN=Pdap1 PE=1 SV=1                                                                       | B2RTB0 (+1)      | Pdap1         | 21 kDa  | 0            | 0           | 0            | 2.8583      | 4.2972       | FALSE     |
| MCG19514, isoform CRA_a OS=Mus musculus GN=Wdr82 PE=1 SV=1                                                        | B2RXQ8 (+1)      | Wdr82         | 35 kDa  | 0            | 0           | 0            | 1.225       | 2.5783       | FALSE     |
| MCG4297 OS=Mus musculus GN=Ube2n PE=1 SV=1                                                                        | A2RTT4 (+1)      | Ube2n         | 17 kDa  | 0            | 0           | 0            | 1.6333      | 2.1486       | FALSE     |
| MCG5603 OS=Mus musculus GN=Ndufa11 PE=1 SV=1                                                                      | G5E814 (+1)      | Ndufa11       | 15 kDa  | 0            | 0           | 0            | 0.81665     | 0.85944      | FALSE     |
| MCG6846, isoform CRA_c OS=Mus musculus GN=Prpsap1 PE=1 SV=1                                                       | B1AT82 (+2)      | Prpsap1       | 42 kDa  | 0            | 0           | 0            | 2.45        | 3.008        | FALSE     |
| Melanoma differentiation-associated protein 5 OS=Mus musculus GN=lfih1 PE=2 SV=1                                  | D2CGM4 (+2)      | lfih1         | 116 kDa | 0            | 0           | 0            | 2.8583      | 0            | FALSE     |
| Membrane magnesium transporter 1 OS=Mus musculus GN=Mmgt1 PE=1 SV=1                                               | Q8K273           | Mmgt1         | 15 kDa  | 0            | 0           | 0            | 0.81665     | 0            | FALSE     |
| Membrane protein, palmitoylated 6 (MAGUK p55 subfamily member 6), isoform CRA_b OS=Mus musculus GN=Mpp6 PE=1 SV=1 | Q3UN60 (+1)      | Mpp6          | 63 kDa  | 0            | 0           | 0            | 1.225       | 0            | FALSE     |
| Membrane-associated phosphatidylinositol transfer protein 1 OS=Mus musculus GN=Pitpnm1 PE=1 SV=1                  | O35954           | Pitpnm1       | 135 kDa | 0            | 0           | 0            | 0           | 0.85944      | FALSE     |
| Membrane-associated progesterone receptor component 2 OS=Mus musculus GN=Pgrmc2 PE=1 SV=1                         | Q80UU9           | Pgrmc2        | 23 kDa  | 0            | 0           | 0            | 1.225       | 2.5783       | FALSE     |
| Metalloproteinase inhibitor 3 OS=Mus musculus GN=Timp3 PE=1 SV=1                                                  | P39876 (+1)      | Timp3         | 24 kDa  | 0            | 0           | 0            | 0.81665     | 0            | FALSE     |
| Metallothionein-1 OS=Mus musculus GN=Mt1 PE=1 SV=1                                                                | P02802           | Mt1           | 6 kDa   | 0            | 0           | 0            | 0           | 0.85944      | FALSE     |
| Metallothionein-2 OS=Mus musculus GN=Mt2 PE=1 SV=2                                                                | P02798           | Mt2           | 6 kDa   | 0            | 0           | 0            | 0           | 3.008        | FALSE     |
| Metastasis-associated protein MTA2 OS=Mus musculus GN=Mta2 PE=1 SV=1                                              | Q9R190           | Mta2          | 75 kDa  | 0            | 0           | 0            | 3.6749      | 3.008        | FALSE     |

| Identified Proteins (2666)                                                                      | Accession Number | Alternate ID | MW      | VPSko-biotin | ctrl-biotin | VPSoe-biotin | ctrl lysate | VPSoe lysate | enriched? |
|-------------------------------------------------------------------------------------------------|------------------|--------------|---------|--------------|-------------|--------------|-------------|--------------|-----------|
| Metaxin OS=Mus musculus GN=Mtx1 PE=2 SV=1                                                       | Q8R5C0           | Mtx1         | 36 kDa  | 0            | 0           | 0            | 0.81665     | 0            | FALSE     |
| Methionine adenosyltransferase 2 subunit beta OS=Mus musculus GN=Mat2b PE=1 SV=1                | Q99LB6           | Mat2b        | 37 kDa  | 0            | 0           | 0            | 2.0416      | 2.5783       | FALSE     |
| Methionine aminopeptidase 2 OS=Mus musculus GN=Metap2 PE=1 SV=1                                 | O08663 (+1)      | Metap2       | 53 kDa  | 0            | 0           | 0            | 1.225       | 0.85944      | FALSE     |
| Methionine aminopeptidase OS=Mus musculus GN=Metap1 PE=1 SV=1                                   | Q4VAA9 (+1)      | Metap1       | 43 kDa  | 0            | 0           | 0            | 1.225       | 1.7189       | FALSE     |
| Methionine sulfoxide reductase B3 OS=Mus musculus GN=Msrb3 PE=1 SV=1                            | A0A0R4J139 (+1)  | Msrb3        | 20 kDa  | 0            | 0           | 0            | 1.6333      | 0            | FALSE     |
| Methionine-tRNA ligase, cytoplasmic OS=Mus musculus GN=Mars PE=1 SV=1                           | Q68FL6           | Mars         | 101 kDa | 3.6831       | 4.7936      | 0            | 8.9832      | 7.7349       | FALSE     |
| Methylmalonyl-CoA mutase, mitochondrial OS=Mus musculus GN=Mut PE=1 SV=2                        | P16332 (+1)      | Mut          | 83 kDa  | 0            | 0           | 0            | 1.225       | 0.85944      | FALSE     |
| Methylosome protein 50 OS=Mus musculus GN=Wdr77 PE=1 SV=1                                       | Q99J09           | Wdr77        | 37 kDa  | 0            | 0           | 0            | 1.225       | 2.1486       | FALSE     |
| Methylosome subunit pICln OS=Mus musculus GN=Clns1a PE=1 SV=1                                   | Q61189 (+1)      | Clns1a       | 26 kDa  | 0            | 0           | 0            | 0.81665     | 0.85944      | FALSE     |
| Methylthioribose-1-phosphate isomerase OS=Mus musculus GN=Mri1 PE=1 SV=1                        | Q9CQT1           | Mri1         | 39 kDa  | 0            | 0           | 0            | 1.225       | 2.1486       | FALSE     |
| Methylthioribose-1-phosphate dehydratase OS=Mus musculus GN=Apip PE=1 SV=1                      | Q9WVQ5           | Apip         | 27 kDa  | 0            | 0           | 0            | 1.6333      | 0            | FALSE     |
| MFLJ00316 protein (Fragment) OS=Mus musculus GN=Gbp7 PE=2 SV=1                                  | Q6KAN1 (+2)      | Gbp7         | 73 kDa  | 0            | 0           | 0            | 2.0416      | 0            | FALSE     |
| MICAL-like protein 1 OS=Mus musculus GN=Micall1 PE=1 SV=3                                       | Q8BGT6           | Micall1      | 94 kDa  | 0            | 0           | 0            | 0           | 1.2892       | FALSE     |
| MICAL-like protein 2 OS=Mus musculus GN=Micall2 PE=1 SV=1                                       | Q3TN34           | Micall2      | 108 kDa | 0            | 0           | 0            | 3.2666      | 5.5863       | FALSE     |
| MICOS complex subunit Mic19 OS=Mus musculus GN=Chchd3 PE=1 SV=1                                 | Q9CRB9           | Chchd3       | 26 kDa  | 0            | 0           | 0            | 0.81665     | 0            | FALSE     |
| MICOS complex subunit Mic26 OS=Mus musculus GN=Apoo PE=1 SV=2                                   | Q9DCZ4 (+1)      | Apoo         | 23 kDa  | 0            | 0           | 0            | 0           | 0.85944      | FALSE     |
| MICOS complex subunit Mic27 OS=Mus musculus GN=Apool PE=1 SV=1                                  | Q78IK4 (+1)      | Apool        | 29 kDa  | 0            | 0           | 0            | 1.225       | 1.7189       | FALSE     |
| MICOS complex subunit Mic60 OS=Mus musculus GN=Immt PE=1 SV=1                                   | Q8CAQ8           | Immt         | 84 kDa  | 3.6831       | 0           | 3.5789       | 6.1249      | 3.8675       | FALSE     |
| Microtubule-associated protein 1S OS=Mus musculus GN=Map1s PE=1 SV=2                            | Q8C052           | Map1s        | 103 kDa | 0            | 0           | 0            | 2.0416      | 1.2892       | FALSE     |
| Microtubule-associated protein 4 OS=Mus musculus GN=Map4 PE=1 SV=3                              | P27546           | Map4         | 117 kDa | 0            | 4.7936      | 3.5789       | 9.3915      | 6.8755       | FALSE     |
| Microtubule-associated protein 6 OS=Mus musculus GN=Map6 PE=1 SV=2                              | Q7TSJ2           | Map6         | 96 kDa  | 0            | 0           | 0            | 0           | 0.85944      | FALSE     |
| Microtubule-associated protein, RP/EB family, member 1 OS=Mus musculus GN=Mapre1 PE=1 SV=1      | Q3U4H0 (+1)      | Mapre1       | 30 kDa  | 0            | 0           | 0            | 3.6749      | 3.008        | FALSE     |
| Microtubule-associated proteins 1A/1B light chain 3B OS=Mus musculus GN=Map1lc3b PE=1 SV=1      | Q9CQV6           | Map1lc3b     | 15 kDa  | 0            | 0           | 0            | 0           | 0.85944      | FALSE     |
| Mini-chromosome maintenance complex-binding protein OS=Mus musculus GN=Mcmbp PE=1 SV=1          | Q8R3C0           | Mcmbp        | 73 kDa  | 0            | 0           | 0            | 2.0416      | 1.7189       | FALSE     |
| Minor histocompatibility antigen H13 OS=Mus musculus GN=Hm13 PE=1 SV=1                          | Q9D8V0           | Hm13         | 42 kDa  | 0            | 0           | 0            | 2.45        | 2.1486       | FALSE     |
| Mitochondrial 10-formyltetrahydrofolate dehydrogenase OS=Mus musculus GN=Aldh1l2 PE=1 SV=1      | Q8K009           | Aldh1l2      | 102 kDa | 0            | 3.1957      | 0            | 10.616      | 6.4458       | FALSE     |
| Mitochondrial amidoxime reducing component 2 OS=Mus musculus GN=Marc2 PE=1 SV=1                 | Q922Q1           | Marc2        | 38 kDa  | 0            | 0           | 0            | 1.225       | 1.2892       | FALSE     |
| Mitochondrial antiviral-signaling protein OS=Mus musculus GN=Mavs PE=1 SV=1                     | Q8VCF0           | Mavs         | 53 kDa  | 0            | 0           | 0            | 1.225       | 1.2892       | FALSE     |
| Mitochondrial carnitine/acylcarnitine carrier protein OS=Mus musculus GN=Slc25a20 PE=1 SV=1     | Q9Z2Z6           | Slc25a20     | 33 kDa  | 0            | 0           | 0            | 0           | 0.85944      | FALSE     |
| Mitochondrial carrier homolog 1 OS=Mus musculus GN=Mtch1 PE=1 SV=1                              | Q791T5           | Mtch1        | 42 kDa  | 0            | 0           | 0            | 1.225       | 0.85944      | FALSE     |
| Mitochondrial import inner membrane translocase subunit TIM44 OS=Mus musculus GN=Timm44         | Q35857 (+1)      | Timm44       | 51 kDa  | 0            | 0           | 0            | 2.45        | 2.5783       | FALSE     |
| Mitochondrial import inner membrane translocase subunit TIM50 OS=Mus musculus GN=Timm50         | Q9D880           | Timm50       | 40 kDa  | 0            | 0           | 0            | 2.45        | 2.5783       | FALSE     |
| Mitochondrial import receptor subunit TOM34 OS=Mus musculus GN=Tomm34 PE=1 SV=1                 | Q9CYG7           | Tomm34       | 34 kDa  | 0            | 0           | 0            | 3.2666      | 2.1486       | FALSE     |
| Mitochondrial import receptor subunit TOM40 homolog OS=Mus musculus GN=Tomm40 PE=1 SV=1         | Q9QYA2           | Tomm40       | 38 kDa  | 0            | 0           | 0            | 1.225       | 1.7189       | FALSE     |
| Mitochondrial pyruvate carrier 2 OS=Mus musculus GN=Mpc2 PE=1 SV=1                              | Q9D023           | Mpc2         | 14 kDa  | 0            | 0           | 0            | 0           | 1.7189       | FALSE     |
| Mitochondrial Rho GTPase 1 OS=Mus musculus GN=Rhot1 PE=1 SV=1                                   | Q8BG51           | Rhot1        | 72 kDa  | 0            | 0           | 0            | 2.45        | 3.008        | FALSE     |
| Mitochondrial ribosomal protein L9 OS=Mus musculus GN=Mrpl9 PE=1 SV=1                           | Q14B21 (+1)      | Mrpl9        | 30 kDa  | 0            | 0           | 0            | 0.81665     | 0            | FALSE     |
| Mitochondrial ribosomal protein S9, isoform CRA_b OS=Mus musculus GN=Mrps9 PE=2 SV=1            | A0A1S6GWG5 (+1)  | Mrps9        | 46 kDa  | 0            | 0           | 0            | 1.225       | 2.1486       | FALSE     |
| Mitogen-activated protein kinase 14 OS=Mus musculus GN=Mapk14 PE=1 SV=3                         | P47811           | Mapk14       | 41 kDa  | 0            | 0           | 0            | 1.6333      | 0.85944      | FALSE     |
| Mitogen-activated protein kinase 3 OS=Mus musculus GN=Mapk3 PE=1 SV=5                           | Q63844           | Mapk3        | 43 kDa  | 0            | 0           | 0            | 4.0833      | 3.4377       | FALSE     |
| Mitogen-activated protein kinase kinase kinase kinase 4 OS=Mus musculus GN=Map4k4 PE=1 SV=1     | A0A0A6YWM8       | Map4k4       | 145 kDa | 0            | 0           | 0            | 2.0416      | 0            | FALSE     |
| Mitogen-activated protein kinase kinase kinase kinase 5 OS=Mus musculus GN=Map4k5 PE=1 SV=1     | Q8BPM2           | Map4k5       | 95 kDa  | 0            | 0           | 0            | 0.81665     | 0.85944      | FALSE     |
| Mitogen-activated protein kinase OS=Mus musculus GN=Mapk1 PE=2 SV=1                             | Q3UF82           | Mapk1        | 41 kDa  | 0            | 0           | 0            | 4.0833      | 3.8675       | FALSE     |
| Mitogen-activated protein kinase OS=Mus musculus GN=Mapk9 PE=2 SV=1                             | Q5NCK8           | Mapk9        | 48 kDa  | 0            | 0           | 0            | 1.6333      | 0            | FALSE     |
| Mitotic checkpoint protein BUB3 OS=Mus musculus GN=Bub3 PE=1 SV=1                               | A0A140LHA2 (+1)  | Bub3         | 37 kDa  | 0            | 0           | 0            | 4.4916      | 2.5783       | FALSE     |
| Mitotic checkpoint serine/threonine-protein kinase BUB1 beta OS=Mus musculus GN=Bub1b PE=1 SV=1 | Q9Z1S0           | Bub1b        | 118 kDa | 0            | 0           | 0            | 1.225       | 0            | FALSE     |
| Mixed lineage kinase domain-like protein OS=Mus musculus GN=Mlkl PE=1 SV=1                      | Q9D2Y4           | Mlkl         | 54 kDa  | 0            | 0           | 0            | 4.8999      | 3.4377       | FALSE     |
| MKIAA0034 protein (Fragment) OS=Mus musculus GN=mKIAA0034 PE=4 SV=2                             | Q80U89           | mKIAA0034    | 192 kDa | 11.049       | 20.772      | 17.895       | 22.05       | 21.916       | FALSE     |
| MKIAA0103 protein (Fragment) OS=Mus musculus GN=Emc2 PE=1 SV=1                                  | Q6A0D1 (+1)      | Emc2         | 35 kDa  | 0            | 0           | 0            | 0.81665     | 1.2892       | FALSE     |
| MKIAA0617 protein (Fragment) OS=Mus musculus GN=mKIAA0617 PE=3 SV=1                             | Q6ZQ84 (+1)      | mKIAA0617    | 91 kDa  | 0            | 0           | 0            | 5.3082      | 3.008        | FALSE     |
| MKIAA0790 protein (Fragment) OS=Mus musculus GN=Sash1 PE=2 SV=1                                 | Q6ZQ46           | Sash1        | 119 kDa | 0            | 0           | 0            | 1.6333      | 2.1486       | FALSE     |

| Identified Proteins (2666)                                                                      | Accession Number | Alternate ID | MW      | VPSko-biotin | ctrl-biotin | VPSoe-biotin | ctrl lysate | VPSoe lysate | enriched? |
|-------------------------------------------------------------------------------------------------|------------------|--------------|---------|--------------|-------------|--------------|-------------|--------------|-----------|
| MKIAA1027 protein (Fragment) OS=Mus musculus GN=Tln1 PE=2 SV=4                                  | Q80TM2           | Tln1         | 272 kDa | 7.3662       | 9.5872      | 8.9474       | 33.483      | 29.651       | FALSE     |
| MKIAA1423 protein (Fragment) OS=Mus musculus GN=mKIAA1423 PE=4 SV=3                             | Q80TD8           | mKIAA1423    | 51 kDa  | 0            | 0           | 0            | 0           | 0.85944      | FALSE     |
| MKIAA1547 protein (Fragment) OS=Mus musculus GN=Tle3 PE=2 SV=1                                  | Q80TC1           | Tle3         | 96 kDa  | 0            | 0           | 0            | 0.81665     | 0.85944      | FALSE     |
| MKIAA1631 protein (Fragment) OS=Mus musculus GN=Mov10 PE=2 SV=1                                 | Q69ZE2           | Mov10        | 116 kDa | 0            | 3.1957      | 3.5789       | 6.5332      | 5.1566       | FALSE     |
| MKIAA4025 protein (Fragment) OS=Mus musculus GN=Hspa4 PE=2 SV=1                                 | Q571M2           | Hspa4        | 103 kDa | 0            | 4.7936      | 3.5789       | 18.783      | 15.04        | FALSE     |
| MKIAA4075 protein (Fragment) OS=Mus musculus GN=Chd4 PE=2 SV=1                                  | Q5DTP7           | Chd4         | 221 kDa | 0            | 0           | 0            | 3.6749      | 2.5783       | FALSE     |
| MKIAA4106 protein (Fragment) OS=Mus musculus GN=Cul2 PE=2 SV=1                                  | Q571A2 (+1)      | Cul2         | 87 kDa  | 0            | 0           | 0            | 2.0416      | 1.2892       | FALSE     |
| MKIAA4114 protein (Fragment) OS=Mus musculus GN=Picalm PE=2 SV=1                                | Q570Z8           | Picalm       | 73 kDa  | 0            | 0           | 0            | 3.2666      | 1.2892       | FALSE     |
| MKIAA4198 protein (Fragment) OS=Mus musculus GN=Stamp PE=2 SV=1                                 | Q5DTH9 (+1)      | Stamp        | 39 kDa  | 0            | 0           | 0            | 1.225       | 0.85944      | FALSE     |
| MKL/myocardin-like protein 1 OS=Mus musculus GN=Mkl1 PE=1 SV=1                                  | D3YUI2 (+2)      | Mkl1         | 93 kDa  | 0            | 0           | 0            | 0.81665     | 1.7189       | FALSE     |
| Mkl2 protein (Fragment) OS=Mus musculus GN=Mkl2 PE=2 SV=1                                       | A3KMF2 (+3)      | Mkl2         | 117 kDa | 0            | 0           | 0            | 0.81665     | 0            | FALSE     |
| MOB kinase activator 1A OS=Mus musculus GN=Mob1a PE=2 SV=3                                      | Q921Y0           | Mob1a        | 25 kDa  | 0            | 0           | 0            | 1.225       | 1.2892       | FALSE     |
| Monoacylglycerol lipase ABHD12 OS=Mus musculus GN=Abhd12 PE=1 SV=2                              | Q99LR1           | Abhd12       | 45 kDa  | 0            | 0           | 0            | 0.81665     | 0            | FALSE     |
| Monofunctional C1-tetrahydrofolate synthase, mitochondrial OS=Mus musculus GN=Mthfd11 PE=2 SV=1 | Q3V3R1           | Mthfd11      | 106 kDa | 0            | 4.7936      | 3.5789       | 10.616      | 8.5944       | FALSE     |
| Mothers against decapentaplegic homolog (Fragment) OS=Mus musculus GN=Smad3 PE=2 SV=1           | Q3V3E0 (+1)      | Smad3        | 42 kDa  | 0            | 0           | 0            | 0           | 0.85944      | FALSE     |
| Mothers against decapentaplegic homolog OS=Mus musculus GN=Smad4 PE=3 SV=1                      | Q811W8           | Smad4        | 60 kDa  | 0            | 0           | 0            | 1.225       | 0            | FALSE     |
| Motile sperm domain-containing protein 2 OS=Mus musculus GN=Mospd2 PE=1 SV=1                    | B1AU74 (+1)      | Mospd2       | 60 kDa  | 0            | 0           | 0            | 1.225       | 0.85944      | FALSE     |
| Mpa2l protein (Fragment) OS=Mus musculus GN=Gbp6 PE=2 SV=1                                      | Q7TMV8           | Gbp6         | 44 kDa  | 0            | 0           | 0            | 1.225       | 0            | FALSE     |
| mRNA cap guanine-N7 methyltransferase OS=Mus musculus GN=Rnmt PE=1 SV=1                         | Q9D0L8           | Rnmt         | 53 kDa  | 0            | 0           | 0            | 0.81665     | 1.7189       | FALSE     |
| Mrpl13 protein (Fragment) OS=Mus musculus GN=Mrpl13 PE=2 SV=1                                   | Q7TMH5 (+1)      | Mrpl13       | 20 kDa  | 0            | 0           | 0            | 0.81665     | 0            | FALSE     |
| Multifunctional protein ADE2 OS=Mus musculus GN=Paics PE=1 SV=4                                 | Q9DCL9           | Paics        | 47 kDa  | 0            | 0           | 0            | 6.5332      | 8.5944       | FALSE     |
| Muscleblind-like protein 2 OS=Mus musculus GN=Mbnl2 PE=2 SV=2                                   | Q8C181           | Mbnl2        | 40 kDa  | 0            | 0           | 0            | 1.225       | 0            | FALSE     |
| MYB binding protein (P160) 1a, isoform CRA_b OS=Mus musculus GN=Mybbp1a PE=1 SV=1               | Q3U2W2 (+1)      | Mybbp1a      | 152 kDa | 0            | 0           | 0            | 4.8999      | 4.7269       | FALSE     |
| Myelin expression factor 2 OS=Mus musculus GN=Myef2 PE=1 SV=1                                   | Q8C854           | Myef2        | 63 kDa  | 0            | 0           | 0            | 1.225       | 1.2892       | FALSE     |
| Myeloid-derived growth factor OS=Mus musculus GN=Mydgf PE=1 SV=1                                | Q9CPT4           | Mydgf        | 18 kDa  | 0            | 0           | 0            | 0.81665     | 0.85944      | FALSE     |
| Myosin phosphatase Rho-interacting protein OS=Mus musculus GN=Mprip PE=1 SV=1                   | Q5SWZ5           | Mprip        | 257 kDa | 0            | 0           | 0            | 2.45        | 1.7189       | FALSE     |
| Myosin regulatory light polypeptide 9 OS=Mus musculus GN=Myl9 PE=1 SV=3                         | Q9CQ19           | Myl9         | 20 kDa  | 0            | 0           | 0            | 4.0833      | 0            | FALSE     |
| Myosin-10 OS=Mus musculus GN=Myh10 PE=1 SV=1                                                    | Q3UH59 (+1)      | Myh10        | 233 kDa | 0            | 0           | 0            | 31.033      | 21.056       | FALSE     |
| Myotrophin OS=Mus musculus GN=Mtpn PE=1 SV=2                                                    | P62774           | Mtpn         | 13 kDa  | 0            | 0           | 0            | 0.81665     | 0.85944      | FALSE     |
| Myotubularin-related protein 5 OS=Mus musculus GN=Sbf1 PE=1 SV=2                                | Q6ZPE2           | Sbf1         | 209 kDa | 0            | 0           | 0            | 0           | 0.85944      | FALSE     |
| Myotubularin-related protein 6 OS=Mus musculus GN=Mtmr6 PE=1 SV=1                               | Q8VE11           | Mtmr6        | 71 kDa  | 0            | 0           | 0            | 0           | 0.85944      | FALSE     |
| Myristoylated alanine-rich C-kinase substrate OS=Mus musculus GN=Marcks PE=1 SV=2               | P26645           | Marcks       | 30 kDa  | 0            | 3.1957      | 0            | 4.0833      | 3.4377       | FALSE     |
| N-acetyl-D-glucosamine kinase OS=Mus musculus GN=Nagk PE=1 SV=1                                 | Q9D997           | Nagk         | 39 kDa  | 0            | 0           | 0            | 0.81665     | 0.85944      | FALSE     |
| N-acetylglucosamine-6-phosphate deacetylase OS=Mus musculus GN=Amdhd2 PE=1 SV=1                 | Q8JZV7           | Amdhd2       | 44 kDa  | 0            | 0           | 0            | 0.81665     | 0            | FALSE     |
| N-acetylglucosamine-6-sulfatase OS=Mus musculus GN=Gns PE=1 SV=1                                | Q8BFR4           | Gns          | 61 kDa  | 0            | 0           | 0            | 0.81665     | 2.1486       | FALSE     |
| N-alpha-acetyltransferase 10 OS=Mus musculus GN=Naa10 PE=1 SV=1                                 | B1AU77 (+3)      | Naa10        | 26 kDa  | 0            | 0           | 0            | 0.81665     | 1.2892       | FALSE     |
| N-alpha-acetyltransferase 15, NatA auxiliary subunit OS=Mus musculus GN=Naa15 PE=1 SV=1         | G3X8Y3           | Naa15        | 101 kDa | 0            | 0           | 0            | 4.8999      | 5.1566       | FALSE     |
| N-alpha-acetyltransferase 16, NatA auxiliary subunit OS=Mus musculus GN=Naa16 PE=2 SV=1         | Q9DBB4           | Naa16        | 101 kDa | 0            | 0           | 0            | 1.6333      | 0            | FALSE     |
| N-alpha-acetyltransferase 35, NatC auxiliary subunit OS=Mus musculus GN=Naa35 PE=1 SV=1         | Q6PHQ8           | Naa35        | 83 kDa  | 0            | 0           | 0            | 1.225       | 0.85944      | FALSE     |
| N-alpha-acetyltransferase 50 OS=Mus musculus GN=Naa50 PE=1 SV=1                                 | Q6PGB6           | Naa50        | 19 kDa  | 0            | 0           | 0            | 1.6333      | 3.4377       | FALSE     |
| N-terminal Xaa-Pro-Lys N-methyltransferase 1 OS=Mus musculus GN=Ntmt1 PE=1 SV=3                 | Q8R2U4           | Ntmt1        | 25 kDa  | 0            | 0           | 0            | 1.225       | 0.85944      | FALSE     |
| N(G),N(G)-dimethylarginine dimethylaminohydrolase 1 OS=Mus musculus GN=Ddah1 PE=1 SV=3          | Q9CWS0           | Ddah1        | 31 kDa  | 0            | 0           | 0            | 1.6333      | 2.1486       | FALSE     |
| N(G),N(G)-dimethylarginine dimethylaminohydrolase 2 OS=Mus musculus GN=Ddah2 PE=1 SV=1          | Q99LD8           | Ddah2        | 30 kDa  | 0            | 0           | 0            | 2.45        | 2.5783       | FALSE     |
| Na(+)/H(+) exchange regulatory cofactor NHE-RF1 OS=Mus musculus GN=Slc9a3r1 PE=1 SV=3           | P70441 (+1)      | Slc9a3r1     | 39 kDa  | 0            | 0           | 0            | 1.225       | 1.2892       | FALSE     |
| NACHT OS=Mus musculus GN=Nlrp2 PE=2 SV=1                                                        | Q4PLS0           | Nlrp2        | 119 kDa | 0            | 0           | 0            | 0           | 1.7189       | FALSE     |
| NAD kinase 2, mitochondrial OS=Mus musculus GN=Nadk2 PE=1 SV=1                                  | Z4YK42           | Nadk2        | 45 kDa  | 0            | 0           | 0            | 1.225       | 1.2892       | FALSE     |
| NAD-dependent malic enzyme, mitochondrial OS=Mus musculus GN=Me2 PE=1 SV=1                      | Q99KE1           | Me2          | 66 kDa  | 0            | 0           | 0            | 2.0416      | 2.1486       | FALSE     |
| NAD(P)-dependent steroid dehydrogenase-like protein OS=Mus musculus GN=Nsdhl PE=2 SV=1          | U3M993           | Nsdhl        | 41 kDa  | 0            | 0           | 0            | 1.6333      | 1.2892       | FALSE     |
| NAD(P)H dehydrogenase, quinone 1 OS=Mus musculus GN=Nqo1 PE=1 SV=1                              | Q542Y0 (+1)      | Nqo1         | 31 kDa  | 0            | 0           | 0            | 1.6333      | 5.5863       | FALSE     |
| NAD(P)H-hydrate epimerase OS=Mus musculus GN=Naxe PE=1 SV=1                                     | Q8K4Z3           | Naxe         | 31 kDa  | 0            | 0           | 0            | 2.0416      | 2.5783       | FALSE     |
| NADH dehydrogenase [ubiquinone] 1 alpha subcomplex subunit 10, mitochondrial OS=Mus musculus    | Q99LC3           | Ndufa10      | 41 kDa  | 0            | 0           | 0            | 0.81665     | 0            | FALSE     |

| Identified Proteins (2666)                                                                     | Accession Number | Alternate ID | MW      | VPSko-biotin | ctrl-biotin | VPSoe-biotin | ctrl lysate | VPSoe lysate | enriched? |
|------------------------------------------------------------------------------------------------|------------------|--------------|---------|--------------|-------------|--------------|-------------|--------------|-----------|
| NADH dehydrogenase [ubiquinone] 1 alpha subcomplex subunit 12 OS=Mus musculus GN=Ndufa1        | A0A0R4J275 (+3)  | Ndufa12      | 18 kDa  | 0            | 0           | 0            | 0.81665     | 0.85944      | FALSE     |
| NADH dehydrogenase [ubiquinone] 1 beta subcomplex subunit 11, mitochondrial OS=Mus musculus    | Q09111 (+1)      | Ndufb11      | 17 kDa  | 0            | 0           | 0            | 0.81665     | 0            | FALSE     |
| NADH dehydrogenase [ubiquinone] flavoprotein 1, mitochondrial OS=Mus musculus GN=Ndufv1        | D3YUM1           | Ndufv1       | 50 kDa  | 0            | 0           | 0            | 2.45        | 1.2892       | FALSE     |
| NADH dehydrogenase [ubiquinone] iron-sulfur protein 2, mitochondrial OS=Mus musculus GN=Ndufs1 | Q91WD5           | Ndufs2       | 53 kDa  | 0            | 0           | 0            | 1.225       | 0            | FALSE     |
| NADH dehydrogenase [ubiquinone] iron-sulfur protein 6, mitochondrial OS=Mus musculus GN=Ndufs6 | P52503           | Ndufs6       | 13 kDa  | 0            | 0           | 0            | 0.81665     | 0.85944      | FALSE     |
| NADH dehydrogenase [ubiquinone] iron-sulfur protein 7, mitochondrial OS=Mus musculus GN=Ndufs7 | Q9DC70           | Ndufs7       | 25 kDa  | 0            | 0           | 0            | 0.81665     | 0            | FALSE     |
| NADH-cytochrome b5 reductase 1 OS=Mus musculus GN=Cyb5r1 PE=1 SV=1                             | Q9DB73           | Cyb5r1       | 34 kDa  | 0            | 0           | 0            | 1.225       | 1.2892       | FALSE     |
| NADH-cytochrome b5 reductase 3 OS=Mus musculus GN=Cyb5r3 PE=1 SV=3                             | Q9DCN2           | Cyb5r3       | 34 kDa  | 0            | 4.7936      | 5.3684       | 9.3915      | 12.032       | FALSE     |
| NADP-dependent malic enzyme OS=Mus musculus GN=Me1 PE=1 SV=2                                   | P06801 (+2)      | Me1          | 64 kDa  | 0            | 0           | 0            | 1.6333      | 1.7189       | FALSE     |
| NADPH-cytochrome P450 reductase OS=Mus musculus GN=Por PE=1 SV=2                               | P37040           | Por          | 77 kDa  | 0            | 0           | 0            | 4.4916      | 7.7349       | FALSE     |
| Nardilysin, N-arginine dibasic convertase, NRD convertase 1 OS=Mus musculus GN=Nrd1 PE=1 SV=1  | A2A9Q2 (+1)      | Nrd1         | 141 kDa | 0            | 0           | 0            | 6.5332      | 5.5863       | FALSE     |
| NECAP endocytosis associated 1 OS=Mus musculus GN=Necap1 PE=1 SV=1                             | Q0VB06 (+2)      | Necap1       | 30 kDa  | 0            | 0           | 0            | 0.81665     | 0.85944      | FALSE     |
| NEDD8 ultimate buster 1 OS=Mus musculus GN=Nub1 PE=1 SV=1                                      | A0A0G2JGQ4 (+2)  | Nub1         | 73 kDa  | 0            | 0           | 0            | 1.225       | 0            | FALSE     |
| NEDD8-activating enzyme E1 catalytic subunit OS=Mus musculus GN=Uba3 PE=1 SV=1                 | Q3TL72 (+1)      | Uba3         | 50 kDa  | 0            | 0           | 0            | 3.6749      | 2.5783       | FALSE     |
| NEDD8-activating enzyme E1 regulatory subunit OS=Mus musculus GN=Nae1 PE=1 SV=1                | Q3UK27 (+1)      | Nae1         | 60 kDa  | 0            | 0           | 0            | 3.6749      | 2.5783       | FALSE     |
| NEDD8-conjugating enzyme Ubc12 OS=Mus musculus GN=Ube2m PE=1 SV=1                              | P61082           | Ube2m        | 21 kDa  | 0            | 0           | 0            | 2.0416      | 1.7189       | FALSE     |
| Negative elongation factor E OS=Mus musculus GN=Nelfe PE=1 SV=2                                | P19426 (+1)      | Nelfe        | 43 kDa  | 0            | 0           | 0            | 1.225       | 0.85944      | FALSE     |
| Neurofibromin OS=Mus musculus GN=Nf1 PE=1 SV=1                                                 | Q04690           | Nf1          | 320 kDa | 0            | 0           | 0            | 0.81665     | 1.2892       | FALSE     |
| Neurolysin, mitochondrial OS=Mus musculus GN=Nln PE=1 SV=1                                     | A0A286YD12 (+1)  | Nln          | 78 kDa  | 0            | 0           | 0            | 2.8583      | 2.5783       | FALSE     |
| Neuroplastin OS=Mus musculus GN=Nptn PE=1 SV=3                                                 | P97300           | Nptn         | 44 kDa  | 0            | 0           | 0            | 3.6749      | 3.4377       | FALSE     |
| Neutral amino acid transporter A OS=Mus musculus GN=Slc1a4 PE=1 SV=1                           | Q35874 (+4)      | Slc1a4       | 56 kDa  | 0            | 0           | 0            | 0.81665     | 0            | FALSE     |
| Neutrophil gelatinase-associated lipocalin OS=Mus musculus GN=Lcn2 PE=1 SV=1                   | P11672           | Lcn2         | 23 kDa  | 0            | 0           | 0            | 0           | 1.7189       | FALSE     |
| NFU1 iron-sulfur cluster scaffold homolog, mitochondrial OS=Mus musculus GN=Nfu1 PE=1 SV=1     | A0A0N4SUH8 (+1)  | Nfu1         | 29 kDa  | 0            | 0           | 0            | 0.81665     | 0.85944      | FALSE     |
| NHL repeat containing 2 OS=Mus musculus GN=Nhlrc2 PE=1 SV=1                                    | B2RR26 (+1)      | Nhlrc2       | 78 kDa  | 0            | 0           | 0            | 1.225       | 1.2892       | FALSE     |
| Niban-like protein 1 OS=Mus musculus GN=Fam129b PE=1 SV=2                                      | Q8R1F1           | Fam129b      | 85 kDa  | 0            | 0           | 0            | 4.4916      | 4.2972       | FALSE     |
| Nicalin OS=Mus musculus GN=Ncln PE=1 SV=1                                                      | D3YU17 (+1)      | Ncln         | 63 kDa  | 0            | 0           | 0            | 2.0416      | 2.5783       | FALSE     |
| Nicastrin OS=Mus musculus GN=Ncstn PE=1 SV=3                                                   | P57716 (+3)      | Ncstn        | 78 kDa  | 0            | 0           | 0            | 1.225       | 0            | FALSE     |
| Nicotinamide phosphoribosyltransferase OS=Mus musculus GN=Nampt PE=1 SV=1                      | Q99KQ4           | Nampt        | 55 kDa  | 0            | 0           | 0            | 4.0833      | 4.7269       | FALSE     |
| Nidogen-1 OS=Mus musculus GN=Nid1 PE=1 SV=2                                                    | P10493           | Nid1         | 137 kDa | 0            | 0           | 0            | 0           | 0.85944      | FALSE     |
| Nischarin OS=Mus musculus GN=Nisch PE=1 SV=2                                                   | Q80TM9           | Nisch        | 175 kDa | 0            | 0           | 0            | 3.2666      | 3.8675       | FALSE     |
| Nitric oxide synthase, inducible OS=Mus musculus GN=Nos2 PE=1 SV=1                             | P29477           | Nos2         | 131 kDa | 0            | 0           | 0            | 0           | 1.2892       | FALSE     |
| NmrA-like family domain-containing protein 1 OS=Mus musculus GN=Nmral1 PE=1 SV=1               | D3YU12 (+1)      | Nmral1       | 33 kDa  | 0            | 0           | 0            | 0.81665     | 0.85944      | FALSE     |
| Nodal modulator 1 OS=Mus musculus GN=Nomo1 PE=1 SV=1                                           | Q6GQT9           | Nomo1        | 133 kDa | 0            | 0           | 0            | 4.8999      | 4.7269       | FALSE     |
| Non-SMC condensin I complex, subunit G OS=Mus musculus GN=Ncapg PE=1 SV=1                      | E9PWG6           | Ncapg        | 113 kDa | 0            | 0           | 0            | 1.6333      | 2.1486       | FALSE     |
| Non-specific lipid-transfer protein OS=Mus musculus GN=Scp2 PE=1 SV=3                          | P32020           | Scp2         | 59 kDa  | 0            | 0           | 0            | 2.0416      | 0.85944      | FALSE     |
| Non-specific serine/threonine protein kinase (Fragment) OS=Mus musculus GN=Mark2 PE=2 SV=1     | Q571J8           | Mark2        | 87 kDa  | 0            | 0           | 0            | 0           | 0.85944      | FALSE     |
| Non-specific serine/threonine protein kinase OS=Mus musculus GN=Prkaa1 PE=2 SV=1               | Q3TUQ7 (+1)      | Prkaa1       | 63 kDa  | 0            | 0           | 0            | 1.6333      | 2.5783       | FALSE     |
| Nsfl1c protein (Fragment) OS=Mus musculus GN=Nsfl1c PE=2 SV=1                                  | Q3KQQ1 (+2)      | Nsfl1c       | 41 kDa  | 0            | 0           | 0            | 5.7166      | 6.0161       | FALSE     |
| Nuclear autoantigenic sperm protein OS=Mus musculus GN=Nasp PE=1 SV=1                          | B1AU75 (+1)      | Nasp         | 84 kDa  | 0            | 0           | 0            | 2.8583      | 1.7189       | FALSE     |
| Nuclear cap-binding protein subunit 1 OS=Mus musculus GN=Ncbp1 PE=1 SV=2                       | Q3UYV9           | Ncbp1        | 92 kDa  | 0            | 0           | 0            | 2.45        | 2.5783       | FALSE     |
| Nuclear export mediator factor Nemf OS=Mus musculus GN=Nemf PE=1 SV=2                          | Q8CCP0           | Nemf         | 121 kDa | 0            | 0           | 0            | 0.81665     | 0            | FALSE     |
| Nuclear factor NF-kappa-B p105 subunit OS=Mus musculus GN=Nfkb1 PE=1 SV=2                      | P25799           | Nfkb1        | 106 kDa | 0            | 0           | 0            | 0           | 1.2892       | FALSE     |
| Nuclear fragile X mental retardation-interacting protein 2 OS=Mus musculus GN=Nufip2 PE=1 SV=1 | Q5F2E7           | Nufip2       | 76 kDa  | 0            | 0           | 0            | 2.0416      | 1.7189       | FALSE     |
| Nuclear inhibitor of protein phosphatase 1 OS=Mus musculus GN=Ppp1r8 PE=1 SV=1                 | A2ADR8 (+1)      | Ppp1r8       | 38 kDa  | 0            | 0           | 0            | 0.81665     | 0            | FALSE     |
| Nuclear localized protein-1 isoform d (Fragment) OS=Mus musculus GN=Tcf25 PE=1 SV=1            | B2ZAC8 (+1)      | Tcf25        | 74 kDa  | 0            | 0           | 0            | 1.6333      | 1.7189       | FALSE     |
| Nuclear pore complex protein Nup50 OS=Mus musculus GN=Nup50 PE=1 SV=3                          | Q9JIH2           | Nup50        | 49 kDa  | 0            | 0           | 0            | 0           | 1.2892       | FALSE     |
| Nuclear protein localization protein 4 homolog OS=Mus musculus GN=Nploc4 PE=1 SV=3             | P60670 (+1)      | Nploc4       | 68 kDa  | 0            | 0           | 0            | 3.2666      | 2.5783       | FALSE     |
| Nuclear transcription factor, X-box-binding-like 1 OS=Mus musculus GN=Nfxl1 PE=1 SV=1          | E9Q8I7           | Nfxl1        | 102 kDa | 0            | 0           | 0            | 0           | 0.85944      | FALSE     |
| Nucleolar protein 58 OS=Mus musculus GN=Nop58 PE=1 SV=1                                        | Q6DFW4           | Nop58        | 60 kDa  | 0            | 0           | 0            | 1.225       | 0            | FALSE     |
| Nucleolysin TIAR OS=Mus musculus GN=Tial1 PE=1 SV=1                                            | P70318 (+2)      | Tial1        | 43 kDa  | 0            | 0           | 0            | 1.225       | 2.1486       | FALSE     |
| Nucleoporin NDC1 OS=Mus musculus GN=Ndc1 PE=1 SV=1                                             | Q8VCB1           | Ndc1         | 75 kDa  | 0            | 0           | 0            | 0.81665     | 0            | FALSE     |



| Identified Proteins (2666)                                                                       | Accession Number | Alternate ID | MW      | VPSko-biotin | ctrl-biotin | VPSoe-biotin | ctrl lysate | VPSoe lysate | enriched? |
|--------------------------------------------------------------------------------------------------|------------------|--------------|---------|--------------|-------------|--------------|-------------|--------------|-----------|
| Nucleoporin NUP53 OS=Mus musculus GN=Nup35 PE=1 SV=2                                             | Q8R4R6           | Nup35        | 35 kDa  | 0            | 0           | 0            | 0.81665     | 0.85944      | FALSE     |
| Nucleoporin SEH1 OS=Mus musculus GN=Seh1l PE=2 SV=1                                              | Q8R2U0           | Seh1l        | 40 kDa  | 0            | 0           | 0            | 0           | 1.2892       | FALSE     |
| Nucleoredoxin OS=Mus musculus GN=Nxn PE=1 SV=1                                                   | P97346           | Nxn          | 48 kDa  | 0            | 0           | 0            | 2.45        | 2.1486       | FALSE     |
| Nucleoside diphosphate kinase (Fragment) OS=Mus musculus GN=Nme4 PE=2 SV=1                       | Q9CS68 (+1)      | Nme4         | 22 kDa  | 0            | 0           | 0            | 0.81665     | 0            | FALSE     |
| Nucleoside diphosphate kinase A OS=Mus musculus GN=Nme1 PE=1 SV=1                                | P15532 (+1)      | Nme1         | 17 kDa  | 0            | 0           | 0            | 9.3915      | 0            | FALSE     |
| Nucleosome assembly protein 1-like 1 OS=Mus musculus GN=Nap1l1 PE=1 SV=2                         | P28656 (+2)      | Nap1l1       | 45 kDa  | 0            | 0           | 3.5789       | 5.3082      | 6.4458       | FALSE     |
| Nucleosome assembly protein 1-like 4 OS=Mus musculus GN=Nap1l4 PE=1 SV=1                         | A2RSB1 (+3)      | Nap1l4       | 43 kDa  | 0            | 0           | 0            | 3.2666      | 3.8675       | FALSE     |
| NudC domain containing 3, isoform CRA_a OS=Mus musculus GN=Nudcd3 PE=2 SV=1                      | B0FTY3 (+1)      | Nudcd3       | 41 kDa  | 0            | 0           | 0            | 0           | 0.85944      | FALSE     |
| NudC domain-containing protein 1 OS=Mus musculus GN=Nudcd1 PE=1 SV=2                             | Q6PIP5           | Nudcd1       | 67 kDa  | 0            | 0           | 0            | 2.8583      | 3.4377       | FALSE     |
| NudC domain-containing protein 2 OS=Mus musculus GN=Nudcd2 PE=1 SV=1                             | Q9CQ48           | Nudcd2       | 18 kDa  | 0            | 0           | 0            | 1.225       | 1.2892       | FALSE     |
| O-acetyl-ADP-ribose deacetylase MACROD1 OS=Mus musculus GN=Macro1 PE=1 SV=2                      | Q922B1           | Macro1       | 35 kDa  | 0            | 0           | 0            | 1.225       | 0            | FALSE     |
| Obg-like ATPase 1 OS=Mus musculus GN=Ola1 PE=1 SV=1                                              | Q9CZ30           | Ola1         | 45 kDa  | 0            | 0           | 0            | 4.0833      | 6.0161       | FALSE     |
| Obscurin-like protein 1 OS=Mus musculus GN=Obsl1 PE=1 SV=1                                       | D3YYU8           | Obsl1        | 198 kDa | 0            | 0           | 0            | 2.8583      | 2.1486       | FALSE     |
| OCIA domain-containing protein 1 (Fragment) OS=Mus musculus GN=Ociad1 PE=1 SV=1                  | A0A0J9YUB6 (+1)  | Ociad1       | 20 kDa  | 0            | 0           | 0            | 0           | 0.85944      | FALSE     |
| Omega-amidase NIT2 OS=Mus musculus GN=Nit2 PE=1 SV=1                                             | Q9JHW2           | Nit2         | 31 kDa  | 0            | 0           | 0            | 2.45        | 3.4377       | FALSE     |
| Osteoclast-stimulating factor 1 OS=Mus musculus GN=Ostf1 PE=1 SV=2                               | Q62422           | Ostf1        | 24 kDa  | 0            | 0           | 0            | 1.6333      | 1.2892       | FALSE     |
| Osteopontin OS=Mus musculus GN=Spp1 PE=1 SV=1                                                    | F8WIP8 (+4)      | Spp1         | 33 kDa  | 0            | 0           | 0            | 0.81665     | 0.85944      | FALSE     |
| OTTMUSWSBP00075795 OS=Mus musculus domesticus GN=OTTMUSWSBG00059279 PE=4 SV=1                    | A0A1G5SJA5 (+2)  | OTTMUSWSBG   | 27 kDa  | 0            | 0           | 0            | 0.81665     | 0            | FALSE     |
| Oxidation resistance protein 1 OS=Mus musculus GN=Oxr1 PE=1 SV=3                                 | Q4KMM3           | Oxr1         | 96 kDa  | 0            | 4.7936      | 0            | 9.7998      | 7.3052       | FALSE     |
| Oxygen-dependent coproporphyrinogen-III oxidase, mitochondrial OS=Mus musculus GN=Cpox PE=1 SV=1 | P36552           | Cpox         | 50 kDa  | 0            | 0           | 0            | 3.6749      | 3.4377       | FALSE     |
| Oxysterol-binding protein 1 OS=Mus musculus GN=Osbp PE=1 SV=3                                    | Q3B7Z2           | Osbp         | 89 kDa  | 0            | 0           | 0            | 0.81665     | 1.2892       | FALSE     |
| Oxysterol-binding protein OS=Mus musculus GN=Osbp11 PE=1 SV=1                                    | G5E8A0           | Osbp11       | 84 kDa  | 0            | 0           | 0            | 0.81665     | 0            | FALSE     |
| Oxysterol-binding protein-related protein 3 OS=Mus musculus GN=Osbp13 PE=1 SV=2                  | Q9DBS9           | Osbp13       | 97 kDa  | 0            | 0           | 0            | 2.45        | 2.5783       | FALSE     |
| Pachytene checkpoint protein 2 homolog OS=Mus musculus GN=Tripl3 PE=1 SV=1                       | Q3UA06           | Tripl3       | 48 kDa  | 0            | 0           | 0            | 3.2666      | 3.8675       | FALSE     |
| Paired mesoderm homeobox protein 1 OS=Mus musculus GN=Prrx1 PE=1 SV=1                            | G3UZ44 (+1)      | Prrx1        | 23 kDa  | 0            | 0           | 0            | 0           | 0.85944      | FALSE     |
| Paraspeckle component 1 OS=Mus musculus GN=Pspc1 PE=1 SV=1                                       | Q8R326           | Pspc1        | 59 kDa  | 0            | 0           | 0            | 1.225       | 2.1486       | FALSE     |
| Parvin, beta OS=Mus musculus GN=Parvb PE=1 SV=1                                                  | Q3UGT9 (+1)      | Parvb        | 42 kDa  | 0            | 0           | 0            | 0           | 1.7189       | FALSE     |
| Paxillin OS=Mus musculus GN=Pxn PE=1 SV=1                                                        | F8VQ28 (+1)      | Pxn          | 65 kDa  | 0            | 0           | 0            | 1.6333      | 1.2892       | FALSE     |
| PC4 and SFRS1-interacting protein OS=Mus musculus GN=Psp1 PE=1 SV=1                              | Q99JF8           | Psp1         | 60 kDa  | 0            | 0           | 0            | 2.0416      | 1.7189       | FALSE     |
| PDZ and LIM domain protein 2 OS=Mus musculus GN=Pdlim2 PE=1 SV=1                                 | Q8R1G6           | Pdlim2       | 38 kDa  | 0            | 0           | 0            | 0.81665     | 0.85944      | FALSE     |
| PDZ and LIM domain protein 4 OS=Mus musculus GN=Pdlim4 PE=1 SV=3                                 | P70271           | Pdlim4       | 36 kDa  | 0            | 0           | 0            | 0           | 0.85944      | FALSE     |
| PDZ and LIM domain protein 5 OS=Mus musculus GN=Pdlim5 PE=1 SV=4                                 | Q8CI51           | Pdlim5       | 63 kDa  | 0            | 4.7936      | 3.5789       | 11.433      | 9.8835       | FALSE     |
| PDZ and LIM domain protein 7 OS=Mus musculus GN=Pdlim7 PE=1 SV=1                                 | Q3TJD7           | Pdlim7       | 50 kDa  | 0            | 0           | 0            | 4.0833      | 3.008        | FALSE     |
| PDZ domain-containing protein GIPC1 OS=Mus musculus GN=Gipc1 PE=1 SV=1                           | Q9Z0G0           | Gipc1        | 36 kDa  | 0            | 0           | 0            | 0.81665     | 0            | FALSE     |
| Peptidyl-prolyl cis-trans isomerase A OS=Mus musculus GN=Ppia PE=1 SV=2                          | P17742 (+3)      | Ppia         | 18 kDa  | 12.891       | 12.783      | 17.895       | 20.416      | 25.353       | FALSE     |
| Peptidyl-prolyl cis-trans isomerase D OS=Mus musculus GN=Ppid PE=1 SV=3                          | Q9CR16           | Ppid         | 41 kDa  | 0            | 0           | 5.3684       | 6.9416      | 8.1647       | FALSE     |
| Peptidyl-prolyl cis-trans isomerase FKBP10 OS=Mus musculus GN=Fkbp10 PE=1 SV=2                   | Q61576           | Fkbp10       | 65 kDa  | 0            | 4.7936      | 3.5789       | 8.9832      | 8.5944       | FALSE     |
| Peptidyl-prolyl cis-trans isomerase FKBP11 OS=Mus musculus GN=Fkbp11 PE=1 SV=1                   | Q9D1M7           | Fkbp11       | 22 kDa  | 0            | 0           | 0            | 1.225       | 1.7189       | FALSE     |
| Peptidyl-prolyl cis-trans isomerase FKBP2 OS=Mus musculus GN=Fkbp2 PE=1 SV=1                     | P45878 (+1)      | Fkbp2        | 15 kDa  | 0            | 0           | 0            | 1.225       | 1.2892       | FALSE     |
| Peptidyl-prolyl cis-trans isomerase FKBP4 OS=Mus musculus GN=Fkbp4 PE=1 SV=5                     | P30416           | Fkbp4        | 52 kDa  | 5.5246       | 3.1957      | 7.1579       | 13.475      | 15.04        | FALSE     |
| Peptidyl-prolyl cis-trans isomerase FKBP7 OS=Mus musculus GN=Fkbp7 PE=1 SV=1                     | O54998 (+1)      | Fkbp7        | 25 kDa  | 0            | 0           | 0            | 0.81665     | 2.1486       | FALSE     |
| Peptidyl-prolyl cis-trans isomerase FKBP8 OS=Mus musculus GN=Fkbp8 PE=1 SV=2                     | O35465           | Fkbp8        | 44 kDa  | 0            | 0           | 0            | 1.225       | 1.2892       | FALSE     |
| Peptidyl-prolyl cis-trans isomerase FKBP9 OS=Mus musculus GN=Fkbp9 PE=1 SV=1                     | Q9Z247           | Fkbp9        | 63 kDa  | 0            | 0           | 0            | 3.6749      | 1.7189       | FALSE     |
| Peptidyl-prolyl cis-trans isomerase NIMA-interacting 4 OS=Mus musculus GN=Pin4 PE=1 SV=1         | Q9CWW6           | Pin4         | 14 kDa  | 0            | 0           | 0            | 1.225       | 0.85944      | FALSE     |
| Peptidyl-prolyl cis-trans isomerase OS=Mus musculus GN=Pin1 PE=2 SV=1                            | Q3UTI7 (+1)      | Pin1         | 18 kDa  | 0            | 0           | 0            | 2.0416      | 2.5783       | FALSE     |
| Peptidyl-prolyl cis-trans isomerase OS=Mus musculus GN=Ppih PE=1 SV=1                            | Q4G0C5           | Ppih         | 19 kDa  | 0            | 0           | 0            | 0.81665     | 1.2892       | FALSE     |
| Peptidyl-prolyl cis-trans isomerase OS=Mus musculus GN=Ppil1 PE=1 SV=1                           | B9EJX8 (+2)      | Ppil1        | 18 kDa  | 0            | 0           | 0            | 1.225       | 2.1486       | FALSE     |
| Peptidyl-tRNA hydrolase 2, mitochondrial OS=Mus musculus GN=Ptrh2 PE=1 SV=1                      | Q8R2Y8           | Ptrh2        | 20 kDa  | 0            | 0           | 0            | 2.45        | 2.1486       | FALSE     |
| Peptidylprolyl isomerase OS=Mus musculus GN=Fkbp3 PE=1 SV=1                                      | Q3UBU9 (+1)      | Fkbp3        | 25 kDa  | 0            | 0           | 0            | 2.0416      | 2.5783       | FALSE     |
| Peptidylprolyl isomerase OS=Mus musculus GN=Fkbp5 PE=1 SV=1                                      | Q4FJN2 (+1)      | Fkbp5        | 51 kDa  | 0            | 0           | 0            | 1.6333      | 1.7189       | FALSE     |
| Perilipin-2 OS=Mus musculus GN=Plin2 PE=1 SV=2                                                   | P43883 (+2)      | Plin2        | 47 kDa  | 0            | 0           | 0            | 0.81665     | 3.008        | FALSE     |

| Identified Proteins (2666)                                                                                                  | Accession Number | Alternate ID | MW      | VPSko-biotin | ctrl-biotin | VPSoe-biotin | ctrl lysate | VPSoe lysate | enriched? |
|-----------------------------------------------------------------------------------------------------------------------------|------------------|--------------|---------|--------------|-------------|--------------|-------------|--------------|-----------|
| Perilipin-3 OS=Mus musculus GN=Plin3 PE=1 SV=1                                                                              | Q9DBG5           | Plin3        | 47 kDa  | 3.6831       | 0           | 3.5789       | 4.8999      | 4.7269       | FALSE     |
| Peroxisomal acyl-coenzyme A oxidase 1 OS=Mus musculus GN=Acox1 PE=1 SV=5                                                    | Q9R0H0           | Acox1        | 75 kDa  | 0            | 0           | 0            | 0           | 1.2892       | FALSE     |
| Peroxisomal carnitine O-octanoyltransferase OS=Mus musculus GN=Crot PE=1 SV=1                                               | Q9DC50           | Crot         | 70 kDa  | 0            | 0           | 0            | 2.0416      | 0.85944      | FALSE     |
| Peroxisomal multifunctional enzyme type 2 OS=Mus musculus GN=Hsd17b4 PE=1 SV=3                                              | P51660 (+2)      | Hsd17b4      | 79 kDa  | 0            | 3.1957      | 0            | 5.3082      | 5.1566       | FALSE     |
| Peroxisomal trans-2-enoyl-CoA reductase OS=Mus musculus GN=Pecr PE=1 SV=1                                                   | Q3UXD9 (+1)      | Pecr         | 28 kDa  | 0            | 0           | 0            | 1.225       | 0.85944      | FALSE     |
| Pescadillo homolog OS=Mus musculus GN=Pes1 PE=1 SV=1                                                                        | Q9EQ61           | Pes1         | 68 kDa  | 0            | 0           | 0            | 0           | 0.85944      | FALSE     |
| Pgm2 protein (Fragment) OS=Mus musculus GN=Pgm2 PE=2 SV=1                                                                   | Q66JR7 (+2)      | Pgm2         | 64 kDa  | 0            | 0           | 0            | 8.1665      | 9.8835       | FALSE     |
| PHD finger protein 6 OS=Mus musculus GN=Phf6 PE=1 SV=1                                                                      | E9QAG2 (+1)      | Phf6         | 36 kDa  | 0            | 0           | 0            | 1.6333      | 1.7189       | FALSE     |
| PHD finger-like domain-containing protein 5A OS=Mus musculus GN=Phf5a PE=1 SV=1                                             | P83870           | Phf5a        | 12 kDa  | 0            | 0           | 0            | 0.81665     | 0.85944      | FALSE     |
| Phosducin-like protein 3 OS=Mus musculus GN=Pdd3 PE=1 SV=1                                                                  | Q8BVF2           | Pdd3         | 28 kDa  | 0            | 0           | 0            | 1.6333      | 0.85944      | FALSE     |
| Phosphatase and actin regulator 4 OS=Mus musculus GN=Phactr4 PE=1 SV=2                                                      | Q501J7           | Phactr4      | 77 kDa  | 0            | 0           | 0            | 0.81665     | 0            | FALSE     |
| Phosphatidylinositol 3,4,5-trisphosphate 5-phosphatase 2 OS=Mus musculus GN=Inpp1 PE=1 SV=1                                 | Q6P549           | Inpp1        | 139 kDa | 0            | 0           | 0            | 0.81665     | 0            | FALSE     |
| Phosphatidylinositol 4-kinase beta OS=Mus musculus GN=Pi4kb PE=1 SV=2                                                       | Q8BKC8           | Pi4kb        | 92 kDa  | 0            | 0           | 0            | 0           | 0.85944      | FALSE     |
| Phosphatidylinositol transfer protein alpha isoform OS=Mus musculus GN=Pitpna PE=1 SV=2                                     | P53810 (+2)      | Pitpna       | 32 kDa  | 0            | 0           | 0            | 3.2666      | 3.008        | FALSE     |
| Phosphatidylinositol transfer protein beta isoform OS=Mus musculus GN=Pitpnb PE=1 SV=2                                      | P53811           | Pitpnb       | 31 kDa  | 0            | 0           | 0            | 2.45        | 3.8675       | FALSE     |
| Phosphatidylserine receptor transcript variant 2 OS=Mus musculus GN=Jmjd6 PE=2 SV=1                                         | B2WTI2 (+1)      | Jmjd6        | 48 kDa  | 0            | 0           | 0            | 0.81665     | 1.2892       | FALSE     |
| Phosphoacetylglucosamine mutase OS=Mus musculus GN=Pgm3 PE=2 SV=1                                                           | Q3TFH8 (+3)      | Pgm3         | 59 kDa  | 0            | 0           | 0            | 0.81665     | 1.2892       | FALSE     |
| Phosphofurin acidic cluster sorting protein 1 OS=Mus musculus GN=Pacs1 PE=1 SV=2                                            | Q8K212           | Pacs1        | 105 kDa | 0            | 0           | 0            | 1.225       | 0.85944      | FALSE     |
| Phosphoglucomutase-2 OS=Mus musculus GN=Pgm2 PE=1 SV=1                                                                      | Q7TSV4           | Pgm2         | 69 kDa  | 0            | 0           | 0            | 2.45        | 2.5783       | FALSE     |
| Phosphoglycerate kinase 1 OS=Mus musculus GN=Pgk1 PE=1 SV=4                                                                 | P09411           | Pgk1         | 45 kDa  | 16.574       | 15.979      | 25.053       | 28.175      | 28.791       | FALSE     |
| Phosphoinositide phospholipase C (Fragment) OS=Mus musculus GN=Plcb3 PE=2 SV=1                                              | Q571K9           | Plcb3        | 117 kDa | 0            | 0           | 0            | 2.0416      | 3.008        | FALSE     |
| Phosphoinositide phospholipase C OS=Mus musculus GN=Plcd1 PE=1 SV=1                                                         | G5DDB7 (+1)      | Plcd1        | 89 kDa  | 0            | 0           | 0            | 1.6333      | 1.7189       | FALSE     |
| Phosphoinositide phospholipase C OS=Mus musculus GN=Plcg1 PE=1 SV=1                                                         | A2A4A6 (+1)      | Plcg1        | 149 kDa | 0            | 0           | 0            | 2.8583      | 1.7189       | FALSE     |
| Phospholipase A-2-activating protein OS=Mus musculus GN=Plaa PE=1 SV=4                                                      | P27612           | Plaa         | 87 kDa  | 0            | 0           | 0            | 4.4916      | 6.4458       | FALSE     |
| Phospholipid scramblase OS=Mus musculus GN=Plscr3 PE=2 SV=1                                                                 | Q3T9B7 (+2)      | Plscr3       | 32 kDa  | 0            | 0           | 0            | 0           | 0.85944      | FALSE     |
| Phosphomannomutase OS=Mus musculus GN=Pmm2 PE=1 SV=1                                                                        | Q545N8 (+1)      | Pmm2         | 28 kDa  | 0            | 0           | 0            | 0.81665     | 0            | FALSE     |
| Phosphoribosylformylglycinamide synthase OS=Mus musculus GN=Pfas PE=1 SV=1                                                  | Q5SUR0           | Pfas         | 145 kDa | 0            | 0           | 0            | 8.5749      | 9.0241       | FALSE     |
| Phosphorylated adapter RNA export protein OS=Mus musculus GN=Phax PE=1 SV=1                                                 | Q9JJT9           | Phax         | 43 kDa  | 0            | 0           | 0            | 0           | 0.85944      | FALSE     |
| Phosphoserine aminotransferase OS=Mus musculus GN=Psat1 PE=2 SV=1                                                           | Q3ULZ3 (+2)      | Psat1        | 40 kDa  | 0            | 0           | 3.5789       | 8.9832      | 7.7349       | FALSE     |
| Phosphoserine phosphatase OS=Mus musculus GN=Psph PE=1 SV=1                                                                 | Q99LS3           | Psph         | 25 kDa  | 0            | 0           | 0            | 1.225       | 0            | FALSE     |
| Pigment epithelium-derived factor OS=Mus musculus GN=Serpinf1 PE=1 SV=2                                                     | P97298           | Serpinf1     | 46 kDa  | 0            | 0           | 0            | 1.225       | 0            | FALSE     |
| Pituitary tumor-transforming gene 1 protein-interacting protein OS=Mus musculus GN=Pttg1ip PE=1 SV=1                        | Q8R143           | Pttg1ip      | 20 kDa  | 0            | 0           | 0            | 0.81665     | 0            | FALSE     |
| Plasma membrane calcium-transporting ATPase 1 OS=Mus musculus GN=Atp2b1 PE=1 SV=1                                           | G5E829           | Atp2b1       | 135 kDa | 0            | 0           | 0            | 5.3082      | 5.1566       | FALSE     |
| Platelet-activating factor acetylhydrolase IB subunit alpha OS=Mus musculus GN=Pafah1b1 PE=1 SV=1                           | P63005 (+3)      | Pafah1b1     | 47 kDa  | 0            | 0           | 0            | 5.3082      | 4.7269       | FALSE     |
| Platelet-activating factor acetylhydrolase IB subunit beta OS=Mus musculus GN=Pafah1b2 PE=1 SV=1                            | Q61206           | Pafah1b2     | 26 kDa  | 0            | 0           | 0            | 1.6333      | 1.7189       | FALSE     |
| Platelet-activating factor acetylhydrolase, isoform 1b, alpha1 subunit, isoform CRA_a OS=Mus musculus GN=Pafah1b3 PE=1 SV=1 | Q3TJC2 (+1)      | Pafah1b3     | 26 kDa  | 0            | 0           | 0            | 1.225       | 1.2892       | FALSE     |
| Pleckstrin homology domain containing, family C (With FERM domain) member 1 OS=Mus musculus GN=Fermt2 PE=1 SV=1             | Q3TLE2 (+1)      | Fermt2       | 78 kDa  | 0            | 0           | 0            | 6.5332      | 4.7269       | FALSE     |
| Pleckstrin homology domain-containing family F member 1 OS=Mus musculus GN=Plekhf1 PE=2 SV=1                                | Q3TB82           | Plekhf1      | 31 kDa  | 0            | 0           | 0            | 0           | 1.2892       | FALSE     |
| Pleckstrin homology domain-containing family O member 2 OS=Mus musculus GN=Plekho2 PE=1 SV=1                                | Q8K124           | Plekho2      | 54 kDa  | 0            | 0           | 0            | 1.225       | 1.2892       | FALSE     |
| Polr1c protein OS=Mus musculus GN=Polr1c PE=2 SV=1                                                                          | A1L3C2 (+1)      | Polr1c       | 39 kDa  | 0            | 0           | 0            | 2.0416      | 1.7189       | FALSE     |
| Poly (ADP-ribose) glycohydrolase, isoform CRA_c OS=Mus musculus GN=Parg PE=1 SV=1                                           | G3X8U8 (+1)      | Parg         | 109 kDa | 0            | 0           | 0            | 0           | 0.85944      | FALSE     |
| Poly [ADP-ribose] polymerase (Fragment) OS=Mus musculus GN=Parp10 PE=2 SV=1                                                 | Q3U6C0 (+2)      | Parp10       | 102 kDa | 0            | 0           | 0            | 0.81665     | 0            | FALSE     |
| Poly [ADP-ribose] polymerase 14 OS=Mus musculus GN=Parp14 PE=1 SV=3                                                         | Q2EMV9           | Parp14       | 204 kDa | 0            | 0           | 0            | 3.2666      | 0            | FALSE     |
| Poly [ADP-ribose] polymerase 9 OS=Mus musculus GN=Parp9 PE=1 SV=2                                                           | Q8CAS9           | Parp9        | 97 kDa  | 0            | 0           | 0            | 4.0833      | 0            | FALSE     |
| Poly [ADP-ribose] polymerase OS=Mus musculus GN=Parp3 PE=2 SV=1                                                             | Q8BXU2 (+1)      | Parp3        | 60 kDa  | 0            | 0           | 0            | 2.0416      | 1.2892       | FALSE     |
| Poly(U)-binding-splicing factor PUF60 OS=Mus musculus GN=Puf60 PE=1 SV=2                                                    | Q3UEB3           | Puf60        | 60 kDa  | 0            | 0           | 0            | 2.0416      | 2.5783       | FALSE     |
| Polyadenylate-binding protein OS=Mus musculus GN=Pabpc4 PE=1 SV=1                                                           | A3KFU8 (+1)      | Pabpc4       | 71 kDa  | 0            | 0           | 0            | 4.8999      | 6.0161       | FALSE     |
| Polyadenylate-binding protein-interacting protein 1 OS=Mus musculus GN=Paip1 PE=1 SV=1                                      | Q8VE62           | Paip1        | 46 kDa  | 0            | 0           | 0            | 0.81665     | 0.85944      | FALSE     |
| Polymerase delta-interacting protein 2 OS=Mus musculus GN=Poldip2 PE=1 SV=1                                                 | Q91VA6           | Poldip2      | 42 kDa  | 0            | 0           | 0            | 1.225       | 0.85944      | FALSE     |
| Polypeptide N-acetylgalactosaminyltransferase (Fragment) OS=Mus musculus GN=Galnt2 PE=2 SV=1                                | Q3UA32 (+2)      | Galnt2       | 61 kDa  | 0            | 0           | 0            | 0           | 0.85944      | FALSE     |
| Polypyrimidine tract binding protein 1 OS=Mus musculus GN=Ptbp1 PE=2 SV=1                                                   | Q5RJV5 (+3)      | Ptbp1        | 59 kDa  | 3.6831       | 4.7936      | 7.1579       | 7.7582      | 8.1647       | FALSE     |

| Identified Proteins (2666)                                                                         | Accession Number | Alternate ID | MW      | VPSko-biotin | ctrl-biotin | VPSoe-biotin | ctrl lysate | VPSoe lysate | enriched? |
|----------------------------------------------------------------------------------------------------|------------------|--------------|---------|--------------|-------------|--------------|-------------|--------------|-----------|
| Polypyrimidine tract-binding protein 2 OS=Mus musculus GN=Ptbp2 PE=1 SV=2                          | Q91Z31           | Ptbp2        | 57 kDa  | 0            | 0           | 0            | 1.225       | 1.2892       | FALSE     |
| Polypyrimidine tract-binding protein 3 OS=Mus musculus GN=Ptbp3 PE=1 SV=1                          | G3UXA6 (+2)      | Ptbp3        | 60 kDa  | 0            | 0           | 0            | 2.8583      | 0            | FALSE     |
| Polyribonucleotide nucleotidyltransferase 1, mitochondrial OS=Mus musculus GN=Pnpt1 PE=1 SV=1      | Q8K1R3           | Pnpt1        | 86 kDa  | 0            | 0           | 0            | 2.45        | 0.85944      | FALSE     |
| Ppfi1 protein OS=Mus musculus GN=Ppfi1 PE=1 SV=1                                                   | B2RXQ2 (+2)      | Ppfi1        | 143 kDa | 0            | 0           | 0            | 0.81665     | 0            | FALSE     |
| Pqbp1 protein OS=Mus musculus GN=Pqbp1 PE=1 SV=1                                                   | A2AER7 (+1)      | Pqbp1        | 31 kDa  | 0            | 0           | 0            | 0           | 0.85944      | FALSE     |
| PRA1 family protein 2 OS=Mus musculus GN=Praf2 PE=1 SV=1                                           | Q9JIG8           | Praf2        | 19 kDa  | 0            | 0           | 0            | 0           | 0.85944      | FALSE     |
| Pre-mRNA-processing factor 19 OS=Mus musculus GN=Prpf19 PE=1 SV=1                                  | Q99KP6           | Prpf19       | 55 kDa  | 0            | 0           | 0            | 1.225       | 1.7189       | FALSE     |
| Pre-mRNA-processing-splicing factor 8 OS=Mus musculus GN=Prpf8 PE=1 SV=2                           | Q99PV0           | Prpf8        | 274 kDa | 0            | 0           | 0            | 1.6333      | 1.2892       | FALSE     |
| Pre-mRNA-splicing factor ATP-dependent RNA helicase DHX15 OS=Mus musculus GN=Dhx15 PE=1 SV=1       | Q35286 (+2)      | Dhx15        | 91 kDa  | 0            | 0           | 0            | 5.7166      | 5.5863       | FALSE     |
| Pre-rRNA-processing protein TSR1 homolog OS=Mus musculus GN=Tsr1 PE=1 SV=1                         | Q5SWD9           | Tsr1         | 92 kDa  | 0            | 0           | 0            | 4.0833      | 4.7269       | FALSE     |
| Predicted gene 20425 OS=Mus musculus GN=Gm20425 PE=4 SV=1                                          | E9Q035           | Gm20425      | 108 kDa | 0            | 0           | 0            | 3.6749      | 3.008        | FALSE     |
| Prefoldin subunit 2 OS=Mus musculus GN=Pfdn2 PE=1 SV=2                                             | O70591           | Pfdn2        | 17 kDa  | 0            | 0           | 0            | 0.81665     | 0.85944      | FALSE     |
| Preylcysteine oxidase-like OS=Mus musculus GN=Pcyox1l PE=1 SV=1                                    | Q8C7K6           | Pcyox1l      | 55 kDa  | 0            | 0           | 0            | 0.81665     | 0            | FALSE     |
| Probable ATP-dependent RNA helicase DDX20 OS=Mus musculus GN=Ddx20 PE=1 SV=2                       | Q9JY4            | Ddx20        | 92 kDa  | 0            | 0           | 0            | 0           | 1.7189       | FALSE     |
| Probable ATP-dependent RNA helicase DDX46 OS=Mus musculus GN=Ddx46 PE=1 SV=2                       | Q569Z5           | Ddx46        | 117 kDa | 0            | 0           | 0            | 1.6333      | 3.8675       | FALSE     |
| Probable ATP-dependent RNA helicase DDX6 OS=Mus musculus GN=Ddx6 PE=1 SV=1                         | P54823           | Ddx6         | 54 kDa  | 0            | 0           | 0            | 5.3082      | 4.2972       | FALSE     |
| Probable ATP-dependent RNA helicase DHX58 OS=Mus musculus GN=Dhx58 PE=1 SV=2                       | Q99J87           | Dhx58        | 77 kDa  | 0            | 0           | 0            | 2.0416      | 0            | FALSE     |
| Probable C-mannosyltransferase DPY19L1 OS=Mus musculus GN=Dpy19l1 PE=1 SV=1                        | A6X919           | Dpy19l1      | 84 kDa  | 0            | 0           | 0            | 1.225       | 1.2892       | FALSE     |
| Probable cytosolic iron-sulfur protein assembly protein CIAO1 OS=Mus musculus GN=Ciao1 PE=1 SV=1   | Q99KN2           | Ciao1        | 38 kDa  | 0            | 0           | 0            | 1.6333      | 2.1486       | FALSE     |
| Probable E3 ubiquitin-protein ligase HERC4 OS=Mus musculus GN=Herc4 PE=1 SV=2                      | Q6PAV2           | Herc4        | 118 kDa | 0            | 0           | 0            | 1.225       | 0            | FALSE     |
| Probable RNA polymerase II nuclear localization protein SLC7A6 OS=Mus musculus GN=Slc7a6 PE=1 SV=1 | Q77PE5           | Slc7a6os     | 35 kDa  | 0            | 0           | 0            | 0.81665     | 1.7189       | FALSE     |
| Probable tRNA N6-adenosine threonylcarbamoyltransferase OS=Mus musculus GN=Osgpe PE=2 SV=1         | Q58EU1 (+1)      | Osgpe        | 36 kDa  | 0            | 0           | 0            | 1.225       | 2.5783       | FALSE     |
| Probable ubiquitin carboxyl-terminal hydrolase FAF-X OS=Mus musculus GN=Usp9x PE=1 SV=2            | P70398 (+1)      | Usp9x        | 291 kDa | 5.5246       | 3.1957      | 8.9474       | 8.9832      | 11.173       | FALSE     |
| Probable Xaa-Pro aminopeptidase 3 OS=Mus musculus GN=Xpnpep3 PE=1 SV=1                             | B7ZMP1           | Xpnpep3      | 57 kDa  | 0            | 0           | 0            | 0.81665     | 0.85944      | FALSE     |
| Processing of 1, ribonuclease P/MRP family, (S. cerevisiae) OS=Mus musculus GN=Pop1 PE=1 SV=1      | Q8K205 (+1)      | Pop1         | 117 kDa | 0            | 0           | 0            | 0           | 0.85944      | FALSE     |
| Procollagen galactosyltransferase 1 OS=Mus musculus GN=Colgalt1 PE=1 SV=2                          | Q8K297           | Colgalt1     | 71 kDa  | 0            | 0           | 3.5789       | 4.0833      | 4.2972       | FALSE     |
| Procollagen-lysine,2-oxoglutarate 5-dioxygenase 1 OS=Mus musculus GN=Plod1 PE=1 SV=1               | Q9R0E2           | Plod1        | 84 kDa  | 0            | 0           | 0            | 4.0833      | 2.5783       | FALSE     |
| Procollagen-lysine,2-oxoglutarate 5-dioxygenase 2 OS=Mus musculus GN=Plod2 PE=1 SV=1               | E9Q718 (+2)      | Plod2        | 87 kDa  | 0            | 0           | 0            | 2.0416      | 3.8675       | FALSE     |
| Profilin-1 OS=Mus musculus GN=Pfn1 PE=1 SV=2                                                       | P62962 (+1)      | Pfn1         | 15 kDa  | 7.3662       | 7.9893      | 8.9474       | 12.658      | 11.602       | FALSE     |
| Programmed cell death 2, isoform CRA_b OS=Mus musculus GN=Pdcc2 PE=1 SV=1                          | AOA0R4J0N5 (+1)  | Pdcc2        | 38 kDa  | 0            | 0           | 0            | 0           | 0.85944      | FALSE     |
| Programmed cell death 6-interacting protein OS=Mus musculus GN=Pdcc6ip PE=1 SV=3                   | Q9WU78           | Pdcc6ip      | 96 kDa  | 3.6831       | 0           | 3.5789       | 6.1249      | 5.5863       | FALSE     |
| Programmed cell death protein 10 OS=Mus musculus GN=Pdcc10 PE=1 SV=1                               | Q8VE70           | Pdcc10       | 25 kDa  | 0            | 0           | 0            | 0.81665     | 0.85944      | FALSE     |
| Programmed cell death protein 4 OS=Mus musculus GN=Pdcc4 PE=1 SV=1                                 | Q61823           | Pdcc4        | 52 kDa  | 0            | 0           | 0            | 0.81665     | 0.85944      | FALSE     |
| Prolactin regulatory element binding, isoform CRA_b OS=Mus musculus GN=Preb PE=1 SV=1              | D3Z3S1 (+2)      | Preb         | 38 kDa  | 0            | 0           | 0            | 1.225       | 1.2892       | FALSE     |
| Proliferating cell nuclear antigen OS=Mus musculus GN=Pcna PE=1 SV=2                               | P17918 (+2)      | Pcna         | 29 kDa  | 0            | 0           | 0            | 4.8999      | 7.3052       | FALSE     |
| Proliferation-associated protein 2G4 OS=Mus musculus GN=Pa2g4 PE=1 SV=3                            | P50580 (+1)      | Pa2g4        | 44 kDa  | 0            | 0           | 3.5789       | 8.9832      | 10.743       | FALSE     |
| Prolyl 3-hydroxylase 1 OS=Mus musculus GN=P3h1 PE=1 SV=1                                           | A6PW84 (+1)      | P3h1         | 84 kDa  | 0            | 0           | 0            | 3.2666      | 1.2892       | FALSE     |
| Prostaglandin G/H synthase 1 OS=Mus musculus GN=Ptgs1 PE=1 SV=1                                    | P22437 (+1)      | Ptgs1        | 69 kDa  | 0            | 0           | 0            | 1.6333      | 1.7189       | FALSE     |
| Prostaglandin G/H synthase 2 OS=Mus musculus GN=Ptgs2 PE=1 SV=1                                    | Q05769 (+1)      | Ptgs2        | 69 kDa  | 0            | 0           | 0            | 4.0833      | 2.5783       | FALSE     |
| Prostaglandin reductase 1 OS=Mus musculus GN=Ptgr1 PE=1 SV=2                                       | Q91YR9           | Ptgr1        | 36 kDa  | 0            | 0           | 0            | 4.0833      | 3.008        | FALSE     |
| Proteasomal ubiquitin receptor ADRM1 OS=Mus musculus GN=Adrm1 PE=1 SV=2                            | Q9JKV1           | Adrm1        | 42 kDa  | 0            | 0           | 0            | 1.225       | 1.2892       | FALSE     |
| Proteasome (Prosome, macropain) 26S subunit, non-ATPase, 7 OS=Mus musculus GN=Psm7 PE=1 SV=1       | A1L3B8 (+1)      | Psm7         | 37 kDa  | 0            | 0           | 0            | 3.2666      | 3.008        | FALSE     |
| Proteasome activator complex subunit 3 OS=Mus musculus GN=Psm3 PE=1 SV=1                           | P61290 (+1)      | Psm3         | 30 kDa  | 0            | 0           | 0            | 2.0416      | 1.7189       | FALSE     |
| Proteasome activator complex subunit 4 OS=Mus musculus GN=Psm4 PE=1 SV=1                           | Q5SSW2           | Psm4         | 211 kDa | 0            | 0           | 0            | 2.0416      | 1.2892       | FALSE     |
| Proteasome assembly chaperone 1 OS=Mus musculus GN=Psmg1 PE=1 SV=1                                 | D3Z795 (+1)      | Psmg1        | 31 kDa  | 0            | 0           | 0            | 2.0416      | 3.4377       | FALSE     |
| Proteasome assembly chaperone 3 OS=Mus musculus GN=Psmg3 PE=1 SV=1                                 | Q9CZH3           | Psmg3        | 13 kDa  | 0            | 0           | 0            | 0.81665     | 0.85944      | FALSE     |
| Proteasome subunit alpha type OS=Mus musculus GN=Psm5 PE=2 SV=1                                    | Q3TU19 (+3)      | Psm5         | 26 kDa  | 0            | 0           | 3.5789       | 3.6749      | 4.2972       | FALSE     |
| Proteasome subunit alpha type-2 OS=Mus musculus GN=Psm2 PE=1 SV=3                                  | P49722 (+2)      | Psm2         | 26 kDa  | 0            | 0           | 0            | 2.0416      | 3.008        | FALSE     |
| Proteasome subunit beta type OS=Mus musculus GN=Psm3 PE=1 SV=1                                     | Q545G0 (+1)      | Psm3         | 23 kDa  | 0            | 0           | 0            | 2.45        | 2.5783       | FALSE     |
| Proteasome subunit beta type OS=Mus musculus GN=Psm8 PE=2 SV=1                                     | AOA068BIT8 (+1)  | Psm8         | 30 kDa  | 0            | 0           | 0            | 3.2666      | 0            | FALSE     |
| Proteasome subunit beta type-1 OS=Mus musculus GN=Psm1 PE=1 SV=1                                   | O09061 (+1)      | Psm1         | 26 kDa  | 0            | 0           | 0            | 3.6749      | 4.2972       | FALSE     |

| Identified Proteins (2666)                                                                          | Accession Number | Alternate ID | MW      | VPSko-biotin | ctrl-biotin | VPSoe-biotin | ctrl lysate | VPSoe lysate | enriched? |
|-----------------------------------------------------------------------------------------------------|------------------|--------------|---------|--------------|-------------|--------------|-------------|--------------|-----------|
| Proteasome subunit beta type-10 OS=Mus musculus GN=Psmb10 PE=1 SV=1                                 | O35955 (+1)      | Psmb10       | 29 kDa  | 0            | 0           | 0            | 1.225       | 0            | FALSE     |
| Proteasome-associated protein ECM29 homolog OS=Mus musculus GN=Ecm29 PE=1 SV=3                      | Q6PDI5           | Ecm29        | 204 kDa | 0            | 0           | 0            | 3.2666      | 2.1486       | FALSE     |
| Protein 4.1G OS=Mus musculus GN=Epb41I2 PE=2 SV=1                                                   | Q80UE3           | Epb41I2      | 110 kDa | 0            | 0           | 0            | 7.7582      | 8.1647       | FALSE     |
| Protein ABHD16A OS=Mus musculus GN=Abhd16a PE=1 SV=3                                                | Q9Z1Q2           | Abhd16a      | 63 kDa  | 0            | 0           | 0            | 1.6333      | 1.2892       | FALSE     |
| Protein arginine methyltransferase NDUFAF7, mitochondrial OS=Mus musculus GN=Ndufaf7 PE=1 SV=1      | O9CWXG8          | Ndufaf7      | 48 kDa  | 0            | 0           | 0            | 0           | 0.85944      | FALSE     |
| Protein arginine N-methyltransferase 5 OS=Mus musculus GN=Prmt5 PE=1 SV=1                           | A0A0R4J049       | Prmt5        | 73 kDa  | 0            | 0           | 0            | 4.0833      | 4.2972       | FALSE     |
| Protein arginine N-methyltransferase 7 OS=Mus musculus GN=Prmt7 PE=1 SV=1                           | Q922X9           | Prmt7        | 78 kDa  | 0            | 0           | 0            | 0           | 0.85944      | FALSE     |
| Protein BUD31 homolog OS=Mus musculus GN=Bud31 PE=1 SV=1                                            | E0CX20           | Bud31        | 17 kDa  | 0            | 0           | 0            | 0.81665     | 1.2892       | FALSE     |
| Protein canopy homolog 2 OS=Mus musculus GN=Cnpy2 PE=1 SV=1                                         | Q9QXT0           | Cnpy2        | 21 kDa  | 0            | 0           | 0            | 1.6333      | 2.5783       | FALSE     |
| Protein canopy homolog 3 OS=Mus musculus GN=Cnpy3 PE=1 SV=1                                         | Q9DAU1           | Cnpy3        | 31 kDa  | 0            | 0           | 0            | 0           | 0.85944      | FALSE     |
| Protein canopy homolog 4 OS=Mus musculus GN=Cnpy4 PE=1 SV=1                                         | Q8BQ47           | Cnpy4        | 28 kDa  | 0            | 0           | 0            | 0.81665     | 0            | FALSE     |
| Protein CDV3 OS=Mus musculus GN=Cdv3 PE=1 SV=2                                                      | Q4VAA2           | Cdv3         | 30 kDa  | 0            | 0           | 0            | 2.0416      | 1.7189       | FALSE     |
| Protein DDI1 homolog 2 OS=Mus musculus GN=Ddi2 PE=1 SV=1                                            | A2ADY9           | Ddi2         | 45 kDa  | 0            | 0           | 0            | 1.225       | 0            | FALSE     |
| Protein DEK OS=Mus musculus GN=Dek PE=1 SV=1                                                        | Q7TNV0           | Dek          | 43 kDa  | 0            | 0           | 0            | 3.2666      | 2.5783       | FALSE     |
| Protein diaphanous homolog 3 OS=Mus musculus GN=Diaph3 PE=1 SV=2                                    | F8WIG5           | Diaph3       | 134 kDa | 0            | 0           | 0            | 1.225       | 0.85944      | FALSE     |
| Protein disulfide-isomerase A4 OS=Mus musculus GN=Pdia4 PE=1 SV=1                                   | A0A0R4J0Z1 (+1)  | Pdia4        | 72 kDa  | 7.3662       | 6.3914      | 5.3684       | 12.25       | 12.892       | FALSE     |
| Protein disulfide-isomerase A5 OS=Mus musculus GN=Pdia5 PE=1 SV=1                                   | Q921X9           | Pdia5        | 59 kDa  | 0            | 0           | 0            | 1.6333      | 0            | FALSE     |
| Protein disulfide-isomerase TMX3 OS=Mus musculus GN=Tmx3 PE=1 SV=2                                  | Q8BXZ1           | Tmx3         | 52 kDa  | 0            | 0           | 0            | 1.225       | 0.85944      | FALSE     |
| Protein enabled homolog OS=Mus musculus GN=Enah PE=1 SV=2                                           | Q03173           | Enah         | 86 kDa  | 0            | 0           | 0            | 2.8583      | 2.1486       | FALSE     |
| Protein FAM114A2 OS=Mus musculus GN=Fam114a2 PE=1 SV=2                                              | Q8VE88           | Fam114a2     | 54 kDa  | 0            | 0           | 0            | 0.81665     | 0            | FALSE     |
| Protein FAM45A OS=Mus musculus GN=Fam45a PE=1 SV=2                                                  | Q9D8N2           | Fam45a       | 40 kDa  | 0            | 0           | 0            | 0.81665     | 0            | FALSE     |
| Protein FAM49B OS=Mus musculus GN=Fam49b PE=1 SV=1                                                  | Q921M7           | Fam49b       | 37 kDa  | 0            | 0           | 0            | 2.0416      | 4.2972       | FALSE     |
| Protein flightless-1 homolog OS=Mus musculus GN=Flii PE=1 SV=1                                      | Q9JJ28           | Flii         | 145 kDa | 0            | 0           | 0            | 3.2666      | 2.5783       | FALSE     |
| Protein FRG1 OS=Mus musculus GN=Frg1 PE=1 SV=2                                                      | P97376 (+2)      | Frg1         | 29 kDa  | 0            | 0           | 0            | 0           | 2.5783       | FALSE     |
| Protein IMPACT OS=Mus musculus GN=Impact PE=1 SV=2                                                  | O55091           | Impact       | 36 kDa  | 0            | 0           | 0            | 1.6333      | 0.85944      | FALSE     |
| Protein incorporated later into tight junctions OS=Mus musculus GN=Tjap1 PE=1 SV=1                  | I7H459 (+1)      | Tjap1        | 61 kDa  | 0            | 0           | 0            | 1.225       | 0            | FALSE     |
| Protein kinase C and casein kinase substrate in neurons 2, isoform CRA_a OS=Mus musculus GN=Pacsin2 | Q3TDA7 (+1)      | Pacsin2      | 56 kDa  | 0            | 0           | 0            | 2.45        | 3.8675       | FALSE     |
| Protein kinase C delta type OS=Mus musculus GN=Prkcd PE=1 SV=3                                      | P28867 (+1)      | Prkcd        | 78 kDa  | 0            | 0           | 0            | 2.45        | 3.4377       | FALSE     |
| Protein kinase C OS=Mus musculus GN=Prkca PE=1 SV=1                                                 | Q4VA93           | Prkca        | 77 kDa  | 0            | 0           | 0            | 2.45        | 1.7189       | FALSE     |
| Protein kinase C OS=Mus musculus GN=Prkci PE=2 SV=1                                                 | Q3TJJ5 (+2)      | Prkci        | 67 kDa  | 0            | 0           | 0            | 0           | 0.85944      | FALSE     |
| Protein kinase, cAMP dependent regulatory, type II alpha OS=Mus musculus GN=Prkar2a PE=1 SV=1       | Q8K1M3           | Prkar2a      | 46 kDa  | 0            | 0           | 0            | 0           | 2.5783       | FALSE     |
| Protein LYRIC OS=Mus musculus GN=Mtdh PE=1 SV=1                                                     | Q80WJ7           | Mtdh         | 64 kDa  | 0            | 0           | 0            | 1.6333      | 4.7269       | FALSE     |
| Protein MEMO1 OS=Mus musculus GN=Memo1 PE=1 SV=1                                                    | Q91VH6           | Memo1        | 34 kDa  | 0            | 0           | 0            | 2.45        | 3.4377       | FALSE     |
| Protein NDRG2 OS=Mus musculus GN=Ndrg2 PE=1 SV=1                                                    | Q9QYGO           | Ndrg2        | 41 kDa  | 0            | 0           | 0            | 0.81665     | 1.2892       | FALSE     |
| Protein NEDD1 OS=Mus musculus GN=Nedd1 PE=1 SV=2                                                    | P33215           | Nedd1        | 71 kDa  | 0            | 0           | 0            | 0.81665     | 1.2892       | FALSE     |
| Protein Niban OS=Mus musculus GN=Fam129a PE=1 SV=2                                                  | Q3UW53           | Fam129a      | 103 kDa | 0            | 0           | 0            | 4.0833      | 3.008        | FALSE     |
| Protein NipSnap homolog 2 OS=Mus musculus GN=Nipsnap2 PE=1 SV=1                                     | O55126 (+2)      | Nipsnap2     | 33 kDa  | 0            | 0           | 0            | 0           | 0.85944      | FALSE     |
| Protein NipSnap homolog 3B OS=Mus musculus GN=Nipsnap3b PE=1 SV=1                                   | Q9CQE1           | Nipsnap3b    | 28 kDa  | 0            | 0           | 0            | 0.81665     | 1.7189       | FALSE     |
| Protein Noxp20 OS=Mus musculus GN=Fam114a1 PE=1 SV=1                                                | Q9D281           | Fam114a1     | 61 kDa  | 0            | 0           | 0            | 4.4916      | 2.1486       | FALSE     |
| Protein O-fucosyltransferase 2 OS=Mus musculus GN=Pofut2 PE=1 SV=1                                  | B2RV73 (+2)      | Pofut2       | 49 kDa  | 0            | 0           | 0            | 0.81665     | 0.85944      | FALSE     |
| Protein O-GlcNAcase OS=Mus musculus GN=Mgea5 PE=1 SV=2                                              | Q9EQQ9           | Mgea5        | 103 kDa | 0            | 0           | 0            | 1.6333      | 1.2892       | FALSE     |
| Protein PBDC1 OS=Mus musculus GN=Pbdc1 PE=1 SV=1                                                    | Q9D0B6           | Pbdc1        | 22 kDa  | 0            | 0           | 0            | 0.81665     | 0            | FALSE     |
| Protein pelota homolog OS=Mus musculus GN=Pelo PE=2 SV=1                                            | Q3THL5 (+1)      | Pelo         | 43 kDa  | 0            | 0           | 0            | 0.81665     | 0.85944      | FALSE     |
| Protein phosphatase 1 regulatory subunit 12A OS=Mus musculus GN=Ppp1r12a PE=1 SV=2                  | Q9DBR7           | Ppp1r12a     | 115 kDa | 0            | 0           | 0            | 4.4916      | 4.7269       | FALSE     |
| Protein phosphatase 1 regulatory subunit 7 OS=Mus musculus GN=Ppp1r7 PE=1 SV=2                      | Q3UM45           | Ppp1r7       | 41 kDa  | 0            | 0           | 0            | 2.0416      | 0.85944      | FALSE     |
| Protein phosphatase 1A OS=Mus musculus GN=Ppm1a PE=1 SV=1                                           | Q9EQE2 (+1)      | Ppm1a        | 36 kDa  | 0            | 0           | 0            | 2.0416      | 0            | FALSE     |
| Protein phosphatase 1B, magnesium dependent, beta isoform OS=Mus musculus GN=Ppm1b PE=1 SV=1        | Q5BKS2 (+1)      | Ppm1b        | 52 kDa  | 0            | 0           | 0            | 1.6333      | 2.5783       | FALSE     |
| Protein phosphatase 1F OS=Mus musculus GN=Ppm1f PE=1 SV=1                                           | Q8CGA0           | Ppm1f        | 50 kDa  | 0            | 0           | 0            | 1.225       | 2.1486       | FALSE     |
| Protein phosphatase 1G OS=Mus musculus GN=Ppm1g PE=1 SV=3                                           | Q61074           | Ppm1g        | 59 kDa  | 0            | 0           | 0            | 2.8583      | 2.5783       | FALSE     |
| Protein phosphatase methylesterase 1 OS=Mus musculus GN=Ppme1 PE=1 SV=5                             | Q8BVQ5           | Ppme1        | 42 kDa  | 0            | 0           | 0            | 1.6333      | 2.1486       | FALSE     |
| Protein PRRC1 OS=Mus musculus GN=Prrc1 PE=1 SV=1                                                    | Q3UPH1           | Prrc1        | 46 kDa  | 0            | 0           | 0            | 2.45        | 0            | FALSE     |

| Identified Proteins (2666)                                                                     | Accession Number | Alternate ID | MW      | VPSko-biotin | ctrl-biotin | VPSoe-biotin | ctrl lysate | VPSoe lysate | enriched? |
|------------------------------------------------------------------------------------------------|------------------|--------------|---------|--------------|-------------|--------------|-------------|--------------|-----------|
| Protein PRRC2A OS=Mus musculus GN=Prrc2a PE=1 SV=1                                             | G3UX48 (+1)      | Prrc2a       | 219 kDa | 0            | 0           | 0            | 2.0416      | 2.5783       | FALSE     |
| Protein RER1 OS=Mus musculus GN=Rer1 PE=1 SV=1                                                 | Q9CQU3           | Rer1         | 23 kDa  | 0            | 0           | 0            | 0.81665     | 0.85944      | FALSE     |
| Protein S100-A10 OS=Mus musculus GN=S100a10 PE=1 SV=2                                          | P08207 (+2)      | S100a10      | 11 kDa  | 0            | 0           | 0            | 0           | 0.85944      | FALSE     |
| Protein S100-A4 OS=Mus musculus GN=S100a4 PE=1 SV=1                                            | P07091 (+1)      | S100a4       | 12 kDa  | 0            | 0           | 0            | 0.81665     | 0.85944      | FALSE     |
| Protein SCAF8 OS=Mus musculus GN=Scaf8 PE=1 SV=1                                               | Q6DID3           | Scaf8        | 140 kDa | 0            | 0           | 0            | 1.225       | 0            | FALSE     |
| Protein scribble homolog OS=Mus musculus GN=Scrib PE=1 SV=2                                    | Q80U72           | Scrib        | 174 kDa | 0            | 0           | 0            | 0           | 1.2892       | FALSE     |
| Protein SEC13 homolog OS=Mus musculus GN=Sec13 PE=1 SV=3                                       | Q9D1M0           | Sec13        | 36 kDa  | 0            | 0           | 0            | 2.8583      | 3.4377       | FALSE     |
| Protein sel-1 homolog 1 OS=Mus musculus GN=Sel1l PE=1 SV=1                                     | J3QJX3           | Sel1l        | 82 kDa  | 0            | 0           | 0            | 0.81665     | 0            | FALSE     |
| Protein SET (Fragment) OS=Mus musculus GN=Set PE=1 SV=1                                        | A2BE93 (+3)      | Set          | 25 kDa  | 0            | 0           | 0            | 2.8583      | 2.5783       | FALSE     |
| Protein SGT1 homolog OS=Mus musculus GN=Sugt1 PE=1 SV=3                                        | Q9CX34           | Sugt1        | 38 kDa  | 0            | 0           | 0            | 4.8999      | 5.1566       | FALSE     |
| Protein Simiate OS=Mus musculus GN=Fam206a PE=1 SV=2                                           | Q80ZQ9           | Fam206a      | 22 kDa  | 0            | 0           | 0            | 0           | 0.85944      | FALSE     |
| Protein Smaug homolog 1 OS=Mus musculus GN=Samd4a PE=1 SV=2                                    | Q8C8BY1          | Samd4a       | 78 kDa  | 0            | 0           | 0            | 1.225       | 0.85944      | FALSE     |
| Protein strawberry notch homolog 1 OS=Mus musculus GN=Sbno1 PE=1 SV=1                          | B2RRI2 (+2)      | Sbno1        | 154 kDa | 0            | 0           | 0            | 0           | 1.2892       | FALSE     |
| Protein transport protein Sec23A OS=Mus musculus GN=Sec23a PE=1 SV=1                           | E9Q153 (+1)      | Sec23a       | 83 kDa  | 0            | 0           | 0            | 5.7166      | 4.7269       | FALSE     |
| Protein transport protein Sec24A OS=Mus musculus GN=Sec24a PE=1 SV=1                           | A2AA71 (+1)      | Sec24a       | 119 kDa | 0            | 0           | 0            | 1.225       | 0.85944      | FALSE     |
| Protein transport protein Sec31A OS=Mus musculus GN=Sec31a PE=1 SV=2                           | Q3UPL0           | Sec31a       | 134 kDa | 0            | 0           | 0            | 12.25       | 9.4538       | FALSE     |
| Protein tweety homolog 3 OS=Mus musculus GN=Ttyh3 PE=1 SV=1                                    | Q6P5F7           | Ttyh3        | 58 kDa  | 0            | 0           | 0            | 0           | 0.85944      | FALSE     |
| Protein unc-119 homolog A OS=Mus musculus GN=Unc119 PE=1 SV=1                                  | B1AQD9 (+2)      | Unc119       | 29 kDa  | 0            | 0           | 0            | 0           | 0.85944      | FALSE     |
| Protein WWC2 OS=Mus musculus GN=Wwc2 PE=1 SV=1                                                 | Q6NXJ0           | Wwc2         | 133 kDa | 0            | 0           | 0            | 0.81665     | 0            | FALSE     |
| Protein YIPF3 OS=Mus musculus GN=Yipf3 PE=1 SV=1                                               | Q3UDR8           | Yipf3        | 38 kDa  | 0            | 0           | 0            | 0           | 0.85944      | FALSE     |
| Protein YIPF5 OS=Mus musculus GN=Yipf5 PE=1 SV=1                                               | Q9EQQ2           | Yipf5        | 28 kDa  | 0            | 0           | 0            | 0.81665     | 0.85944      | FALSE     |
| Protein-glutamine gamma-glutamyltransferase 2 OS=Mus musculus GN=Tgm2 PE=1 SV=4                | P21981           | Tgm2         | 77 kDa  | 0            | 0           | 0            | 1.225       | 0            | FALSE     |
| Protein-L-isoaspartate(D-aspartate) O-methyltransferase OS=Mus musculus GN=Pcmt1 PE=1 SV=1     | P23506 (+1)      | Pcmt1        | 25 kDa  | 0            | 0           | 0            | 1.6333      | 2.5783       | FALSE     |
| Prpsap2 protein OS=Mus musculus GN=Prpsap2 PE=1 SV=1                                           | Q5SWZ0 (+2)      | Prpsap2      | 41 kDa  | 0            | 0           | 0            | 2.45        | 2.1486       | FALSE     |
| Psap protein OS=Mus musculus GN=Psap PE=2 SV=1                                                 | B2RUD7 (+14)     | Psap         | 61 kDa  | 0            | 0           | 0            | 2.45        | 3.008        | FALSE     |
| Pseudouridylate synthase 7 OS=Mus musculus GN=Pus7 PE=1 SV=1                                   | B7ZNL8 (+1)      | Pus7         | 75 kDa  | 0            | 0           | 0            | 2.45        | 3.4377       | FALSE     |
| Purine nucleoside phosphorylase OS=Mus musculus GN=Pnp PE=1 SV=2                               | P23492 (+1)      | Pnp          | 32 kDa  | 0            | 3.1957      | 0            | 4.8999      | 5.1566       | FALSE     |
| Putative RNA-binding protein Luc7-like 1 OS=Mus musculus GN=Luc7l PE=1 SV=2                    | Q9CYI4           | Luc7l        | 44 kDa  | 0            | 0           | 0            | 2.45        | 2.5783       | FALSE     |
| PX domain-containing protein kinase-like protein OS=Mus musculus GN=Pxk PE=1 SV=1              | A0A2C9F2B5 (+1)  | Pxk          | 65 kDa  | 0            | 0           | 0            | 0.81665     | 0.85944      | FALSE     |
| Pyp protein OS=Mus musculus GN=Ppa1 PE=1 SV=1                                                  | Q4FK49 (+1)      | Ppa1         | 33 kDa  | 0            | 0           | 0            | 7.7582      | 7.7349       | FALSE     |
| Pyridoxal kinase OS=Mus musculus GN=Pdxk PE=1 SV=1                                             | Q8K183           | Pdxk         | 35 kDa  | 0            | 0           | 0            | 0           | 1.7189       | FALSE     |
| Pyridoxal phosphate homeostasis protein OS=Mus musculus GN=Plpbp PE=1 SV=1                     | Q544R1 (+1)      | Plpbp        | 30 kDa  | 0            | 0           | 0            | 1.225       | 1.2892       | FALSE     |
| Pyroline-5-carboxylate reductase 3 OS=Mus musculus GN=Pycr3 PE=1 SV=2                          | Q9DCC4           | Pycr3        | 29 kDa  | 0            | 0           | 0            | 0           | 1.7189       | FALSE     |
| Pyroline-5-carboxylate reductase OS=Mus musculus GN=Pycr1 PE=1 SV=1                            | Q3UTR5 (+1)      | Pycr1        | 32 kDa  | 0            | 0           | 0            | 2.0416      | 0            | FALSE     |
| Pyroline-5-carboxylate reductase OS=Mus musculus GN=Pycr2 PE=2 SV=1                            | Q3TJ21 (+2)      | Pycr2        | 34 kDa  | 0            | 0           | 0            | 2.45        | 2.1486       | FALSE     |
| Pyruvate dehydrogenase E1 component subunit alpha, somatic form, mitochondrial OS=Mus musculus | P35486 (+1)      | Pdha1        | 43 kDa  | 0            | 3.1957      | 0            | 3.2666      | 3.4377       | FALSE     |
| Pyruvate kinase PKM OS=Mus musculus GN=Pkm PE=1 SV=4                                           | P52480           | Pkm          | 58 kDa  | 31.306       | 23.968      | 28.632       | 42.874      | 48.128       | FALSE     |
| Quinone oxidoreductase OS=Mus musculus GN=Cryz PE=1 SV=1                                       | P47199 (+1)      | Cryz         | 35 kDa  | 0            | 0           | 0            | 1.225       | 1.2892       | FALSE     |
| Rab GDP dissociation inhibitor alpha OS=Mus musculus GN=Gdi1 PE=1 SV=3                         | P50396           | Gdi1         | 51 kDa  | 0            | 0           | 0            | 8.5749      | 8.1647       | FALSE     |
| Rab GDP dissociation inhibitor beta OS=Mus musculus GN=Gdi2 PE=1 SV=1                          | Q61598           | Gdi2         | 51 kDa  | 5.5246       | 3.1957      | 8.9474       | 11.433      | 16.329       | FALSE     |
| Rab GTPase-activating protein 1 OS=Mus musculus GN=Rabgap1 PE=1 SV=1                           | A2AWA9 (+1)      | Rabgap1      | 121 kDa | 0            | 0           | 0            | 2.0416      | 0            | FALSE     |
| Rab proteins geranylgeranyltransferase component A 1 OS=Mus musculus GN=Chm PE=1 SV=1          | Q9QXG2           | Chm          | 74 kDa  | 0            | 0           | 0            | 0.81665     | 0            | FALSE     |
| Rab-like protein 6 OS=Mus musculus GN=Rab16 PE=1 SV=2                                          | Q5U3K5           | Rab16        | 80 kDa  | 0            | 0           | 0            | 0.81665     | 0            | FALSE     |
| Rab11 family-interacting protein 5 OS=Mus musculus GN=Rab11fip5 PE=1 SV=2                      | Q8R361           | Rab11fip5    | 70 kDa  | 0            | 0           | 0            | 1.6333      | 0.85944      | FALSE     |
| RAB14 protein OS=Mus musculus GN=Rab14 PE=1 SV=1                                               | Q50HX4 (+1)      | Rab14        | 24 kDa  | 3.6831       | 3.1957      | 3.5789       | 4.0833      | 6.0161       | FALSE     |
| RAB1B, member RAS oncogene family, isoform CRA_c OS=Mus musculus GN=Rab1b PE=1 SV=1            | Q0PD66 (+1)      | Rab1b        | 22 kDa  | 0            | 0           | 0            | 2.45        | 4.2972       | FALSE     |
| Rab22B OS=Mus musculus GN=Rab31 PE=1 SV=1                                                      | Q3TXV4 (+1)      | Rab31        | 21 kDa  | 0            | 0           | 0            | 1.6333      | 0.85944      | FALSE     |
| RAB23, member RAS oncogene family, isoform CRA_a OS=Mus musculus GN=Rab23 PE=1 SV=1            | Q9D4I9           | Rab23        | 27 kDa  | 0            | 0           | 0            | 1.225       | 0            | FALSE     |
| Rab3 GTPase-activating protein catalytic subunit OS=Mus musculus GN=Rab3gap1 PE=1 SV=1         | A0A1D5R1G3 (+2)  | Rab3gap1     | 111 kDa | 0            | 0           | 0            | 0.81665     | 0.85944      | FALSE     |
| Rab3 GTPase-activating protein non-catalytic subunit OS=Mus musculus GN=Rab3gap2 PE=1 SV=1     | E9QKE4           | Rab3gap2     | 155 kDa | 0            | 0           | 0            | 1.6333      | 0.85944      | FALSE     |
| RAB9, member RAS oncogene family (Fragment) OS=Mus musculus GN=Rab9 PE=1 SV=1                  | A2AFP5 (+2)      | Rab9         | 23 kDa  | 0            | 0           | 0            | 0.81665     | 0            | FALSE     |

| Identified Proteins (2666)                                                                        | Accession Number | Alternate ID | MW      | VPSko-biotin | ctrl-biotin | VPSoe-biotin | ctrl lysate | VPSoe lysate | enriched? |
|---------------------------------------------------------------------------------------------------|------------------|--------------|---------|--------------|-------------|--------------|-------------|--------------|-----------|
| Rac GTPase-activating protein 1 OS=Mus musculus GN=Racgap1 PE=1 SV=1                              | Q9WVM1           | Racgap1      | 70 kDa  | 0            | 0           | 0            | 0           | 1.2892       | FALSE     |
| RAC-alpha serine/threonine-protein kinase OS=Mus musculus GN=Akt1 PE=1 SV=2                       | P31750           | Akt1         | 56 kDa  | 0            | 0           | 0            | 2.0416      | 2.5783       | FALSE     |
| RAF proto-oncogene serine/threonine-protein kinase OS=Mus musculus GN=Raf1 PE=1 SV=2              | Q99N57           | Raf1         | 73 kDa  | 0            | 0           | 0            | 1.6333      | 0            | FALSE     |
| Ran-binding protein 3 OS=Mus musculus GN=Ranbp3 PE=1 SV=2                                         | Q9CT10           | Ranbp3       | 53 kDa  | 0            | 0           | 0            | 4.8999      | 3.4377       | FALSE     |
| Ran-binding protein 9 OS=Mus musculus GN=Ranbp9 PE=1 SV=1                                         | E9Q5D6           | Ranbp9       | 76 kDa  | 0            | 0           | 0            | 0           | 0.85944      | FALSE     |
| RAP1, GTP-GDP dissociation stimulator 1 OS=Mus musculus GN=Rap1gds1 PE=1 SV=1                     | E9Q912 (+2)      | Rap1gds1     | 66 kDa  | 0            | 0           | 0            | 2.8583      | 3.4377       | FALSE     |
| Ras and Rab interactor 1 OS=Mus musculus GN=Rin1 PE=1 SV=1                                        | A0A2C9F2A2 (+1)  | Rin1         | 84 kDa  | 0            | 0           | 0            | 1.225       | 0.85944      | FALSE     |
| Ras association (RalGDS/AF-6) and pleckstrin homology domains 1 OS=Mus musculus GN=Raph1          | F2Z4B7 (+1)      | Raph1        | 73 kDa  | 0            | 0           | 0            | 1.225       | 0            | FALSE     |
| Ras GTPase-activating protein 4 OS=Mus musculus GN=Rasa4 PE=1 SV=1                                | Q6PFQ7           | Rasa4        | 90 kDa  | 0            | 0           | 0            | 0.81665     | 1.7189       | FALSE     |
| Ras homolog OS=Mus musculus GN=Rheb PE=2 SV=1                                                     | Q9ESR1           | Rheb         | 20 kDa  | 0            | 0           | 0            | 2.0416      | 2.1486       | FALSE     |
| RAS p21 protein activator 1 OS=Mus musculus GN=Rasa1 PE=2 SV=1                                    | Q91YX7           | Rasa1        | 94 kDa  | 0            | 0           | 0            | 1.6333      | 0.85944      | FALSE     |
| RAS related protein 1b OS=Mus musculus GN=Rap1b PE=1 SV=1                                         | Q52L50 (+1)      | Rap1b        | 21 kDa  | 0            | 0           | 0            | 2.45        | 3.4377       | FALSE     |
| Ras suppressor protein 1 OS=Mus musculus GN=Rsu1 PE=1 SV=3                                        | Q01730 (+1)      | Rsu1         | 32 kDa  | 0            | 0           | 0            | 1.225       | 0            | FALSE     |
| RAS-related C3 botulinum substrate 1 OS=Mus musculus GN=Rac1 PE=1 SV=1                            | K7Q7T7 (+2)      | Rac1         | 21 kDa  | 0            | 3.1957      | 3.5789       | 5.3082      | 5.1566       | FALSE     |
| Ras-related GTP-binding protein A OS=Mus musculus GN=Rraga PE=1 SV=1                              | Q80X95           | Rraga        | 37 kDa  | 0            | 0           | 0            | 0           | 0.85944      | FALSE     |
| Ras-related GTP-binding protein C OS=Mus musculus GN=Rragc PE=1 SV=1                              | Q99K70           | Rragc        | 44 kDa  | 0            | 0           | 0            | 1.6333      | 1.7189       | FALSE     |
| Ras-related protein R-Ras OS=Mus musculus GN=Rras PE=1 SV=1                                       | P10833 (+1)      | Rras         | 24 kDa  | 0            | 0           | 0            | 1.6333      | 1.7189       | FALSE     |
| Ras-related protein R-Ras2 OS=Mus musculus GN=Rras2 PE=1 SV=1                                     | P62071           | Rras2        | 23 kDa  | 0            | 0           | 0            | 1.225       | 1.2892       | FALSE     |
| Ras-related protein Rab-10 OS=Mus musculus GN=Rab10 PE=1 SV=1                                     | P61027 (+1)      | Rab10        | 23 kDa  | 0            | 0           | 0            | 4.8999      | 4.7269       | FALSE     |
| Ras-related protein Rab-12 OS=Mus musculus GN=Rab12 PE=1 SV=1                                     | A2CG35 (+1)      | Rab12        | 32 kDa  | 0            | 0           | 0            | 1.225       | 2.1486       | FALSE     |
| Ras-related protein Rab-18 OS=Mus musculus GN=Rab18 PE=1 SV=2                                     | P35293 (+1)      | Rab18        | 23 kDa  | 0            | 0           | 0            | 2.45        | 2.1486       | FALSE     |
| Ras-related protein Rab-1A OS=Mus musculus GN=Rab1A PE=1 SV=3                                     | P62821 (+2)      | Rab1A        | 23 kDa  | 0            | 3.1957      | 3.5789       | 4.0833      | 5.5863       | FALSE     |
| Ras-related protein Rab-21 OS=Mus musculus GN=Rab21 PE=1 SV=4                                     | P35282 (+2)      | Rab21        | 24 kDa  | 0            | 0           | 0            | 1.6333      | 2.5783       | FALSE     |
| Ras-related protein Rab-3B OS=Mus musculus GN=Rab3b PE=1 SV=1                                     | A2A7Z6 (+2)      | Rab3b        | 26 kDa  | 0            | 0           | 0            | 2.0416      | 2.5783       | FALSE     |
| Ras-related protein Rab-6A OS=Mus musculus GN=Rab6a PE=1 SV=4                                     | P35279 (+2)      | Rab6a        | 24 kDa  | 0            | 0           | 0            | 1.6333      | 3.008        | FALSE     |
| Ras-related protein Rab-7a OS=Mus musculus GN=Rab7a PE=1 SV=2                                     | P51150 (+1)      | Rab7a        | 23 kDa  | 3.6831       | 3.1957      | 0            | 6.5332      | 6.8755       | FALSE     |
| Ras-related protein Ral-A OS=Mus musculus GN=Rala PE=1 SV=1                                       | P63321 (+1)      | Rala         | 24 kDa  | 0            | 0           | 0            | 1.6333      | 0            | FALSE     |
| Ras-related protein Rap-2c OS=Mus musculus GN=Rap2c PE=1 SV=1                                     | Q8BU31           | Rap2c        | 21 kDa  | 0            | 0           | 0            | 2.0416      | 2.1486       | FALSE     |
| RCC1 and BTB domain-containing protein 2 OS=Mus musculus GN=Rcctb2 PE=1 SV=1                      | E9Q3B1 (+2)      | Rcctb2       | 56 kDa  | 0            | 0           | 0            | 0.81665     | 0            | FALSE     |
| Receptor expression-enhancing protein OS=Mus musculus GN=Reep5 PE=1 SV=1                          | G3X8R0 (+3)      | Reep5        | 21 kDa  | 0            | 0           | 0            | 0.81665     | 0            | FALSE     |
| Regulator of nonsense transcripts 1 OS=Mus musculus GN=Upf1 PE=1 SV=2                             | Q9EPU0           | Upf1         | 124 kDa | 7.3662       | 0           | 7.1579       | 11.433      | 9.4538       | FALSE     |
| Renin/prorenin receptor OS=Mus musculus GN=Atp6ap2 PE=1 SV=2                                      | Q1XID4 (+1)      | Atp6ap2      | 39 kDa  | 0            | 0           | 0            | 0           | 0.85944      | FALSE     |
| Replication factor C (Activator 1) 2 OS=Mus musculus GN=Rfc2 PE=1 SV=1                            | Q4KL82 (+2)      | Rfc2         | 39 kDa  | 0            | 0           | 0            | 1.6333      | 1.2892       | FALSE     |
| Replication factor C subunit 1 OS=Mus musculus GN=Rfc1 PE=1 SV=1                                  | A0A0N5E9G7 (+3)  | Rfc1         | 126 kDa | 0            | 0           | 0            | 2.8583      | 2.1486       | FALSE     |
| Replication factor C subunit 4 OS=Mus musculus GN=Rfc4 PE=1 SV=1                                  | Q3UI84 (+1)      | Rfc4         | 41 kDa  | 0            | 0           | 0            | 0.81665     | 0.85944      | FALSE     |
| Reticulon-4 OS=Mus musculus GN=Rtn4 PE=1 SV=2                                                     | Q99P72           | Rtn4         | 127 kDa | 0            | 3.1957      | 7.1579       | 8.5749      | 9.8835       | FALSE     |
| Retinal rod rhodopsin-sensitive cGMP 3',5'-cyclic phosphodiesterase subunit delta OS=Mus musculus | O55057 (+2)      | Pde6d        | 17 kDa  | 0            | 0           | 0            | 0           | 0.85944      | FALSE     |
| Retinoid-inducible serine carboxypeptidase OS=Mus musculus GN=Scpep1 PE=1 SV=2                    | Q920A5 (+1)      | Scpep1       | 51 kDa  | 0            | 0           | 0            | 1.225       | 0            | FALSE     |
| Rho GDP-dissociation inhibitor 1 OS=Mus musculus GN=Arhgdia PE=1 SV=3                             | Q99PT1           | Arhgdia      | 23 kDa  | 0            | 3.1957      | 3.5789       | 5.7166      | 6.4458       | FALSE     |
| Rho GDP-dissociation inhibitor 2 OS=Mus musculus GN=Arhgdb PE=1 SV=3                              | Q61599           | Arhgdb       | 23 kDa  | 0            | 0           | 0            | 4.4916      | 3.4377       | FALSE     |
| Rho GTPase-activating protein 1 OS=Mus musculus GN=Arhgap1 PE=1 SV=1                              | A2AH25 (+1)      | Arhgap1      | 54 kDa  | 0            | 0           | 0            | 5.3082      | 2.5783       | FALSE     |
| Rho guanine nucleotide exchange factor 7 OS=Mus musculus GN=Arhgef7 PE=1 SV=2                     | Q9ES28           | Arhgef7      | 97 kDa  | 0            | 0           | 0            | 1.6333      | 0.85944      | FALSE     |
| Rho-associated protein kinase 2 (Fragment) OS=Mus musculus GN=Rock2 PE=1 SV=1                     | A0A1Y7VMNO (+1)  | Rock2        | 167 kDa | 0            | 0           | 0            | 3.2666      | 2.5783       | FALSE     |
| Rho-related GTP-binding protein RhoB OS=Mus musculus GN=Rhob PE=1 SV=1                            | P62746 (+1)      | Rhob         | 22 kDa  | 0            | 0           | 0            | 0           | 1.2892       | FALSE     |
| Rho-related GTP-binding protein RhoC OS=Mus musculus GN=Rhoc PE=1 SV=2                            | Q62159           | Rhoc         | 22 kDa  | 0            | 0           | 0            | 4.4916      | 5.5863       | FALSE     |
| Rho-related GTP-binding protein RhoE OS=Mus musculus GN=Rnd3 PE=1 SV=1                            | P61588           | Rnd3         | 27 kDa  | 0            | 0           | 0            | 1.225       | 0            | FALSE     |
| Rho-related GTP-binding protein RhoG OS=Mus musculus GN=Rhog PE=1 SV=1                            | P84096 (+1)      | Rhog         | 21 kDa  | 0            | 0           | 0            | 2.8583      | 3.008        | FALSE     |
| Ribonuclease H2 subunit A OS=Mus musculus GN=Rnaseh2a PE=1 SV=2                                   | Q9CWY8           | Rnaseh2a     | 34 kDa  | 0            | 0           | 0            | 0.81665     | 0            | FALSE     |
| Ribonuclease inhibitor OS=Mus musculus GN=Rnh1 PE=1 SV=1                                          | A0A1B0GSG5 (+2)  | Rnh1         | 54 kDa  | 0            | 3.1957      | 3.5789       | 6.9416      | 5.5863       | FALSE     |
| Ribonucleoside-diphosphate reductase large subunit OS=Mus musculus GN=Rrm1 PE=1 SV=2              | P07742           | Rrm1         | 90 kDa  | 0            | 0           | 0            | 4.4916      | 4.7269       | FALSE     |
| Ribonucleoside-diphosphate reductase subunit M2 OS=Mus musculus GN=Rrm2 PE=1 SV=1                 | P11157 (+1)      | Rrm2         | 45 kDa  | 0            | 0           | 0            | 3.2666      | 3.008        | FALSE     |



| Identified Proteins (2666)                                                                | Accession Number | Alternate ID  | MW      | VPSko-biotin | ctrl-biotin | VPSoe-biotin | ctrl lysate | VPSoe lysate | enriched? |
|-------------------------------------------------------------------------------------------|------------------|---------------|---------|--------------|-------------|--------------|-------------|--------------|-----------|
| Ribophorin OS=Mus musculus GN=Rpn2 PE=2 SV=1                                              | Q61833 (+1)      | Rpn2          | 66 kDa  | 0            | 0           | 0            | 5.3082      | 6.4458       | FALSE     |
| Ribose-phosphate pyrophosphokinase 2 OS=Mus musculus GN=Prps2 PE=1 SV=4                   | Q9CS42           | Prps2         | 35 kDa  | 0            | 0           | 0            | 3.2666      | 4.7269       | FALSE     |
| Ribosomal protein L15 OS=Mus musculus GN=Gm10020 PE=3 SV=1                                | E9QAZ2 (+3)      | Gm10020       | 24 kDa  | 0            | 0           | 0            | 4.0833      | 4.2972       | FALSE     |
| Ribosomal protein L19 OS=Mus musculus GN=Rpl19 PE=1 SV=1                                  | A2A547 (+2)      | Rpl19         | 23 kDa  | 0            | 0           | 0            | 2.45        | 2.5783       | FALSE     |
| Ribosomal protein L28 OS=Mus musculus GN=Rpl28 PE=2 SV=1                                  | Q5M9N5           | Rpl28         | 16 kDa  | 0            | 0           | 0            | 3.2666      | 3.8675       | FALSE     |
| Ribosomal protein L4 OS=Mus musculus GN=Rpl4 PE=1 SV=1                                    | Q564E8 (+1)      | Rpl4          | 47 kDa  | 0            | 0           | 0            | 14.291      | 15.47        | FALSE     |
| Ribosomal protein L7A OS=Mus musculus GN=Rpl7a PE=2 SV=1                                  | Q5EBG5           | Rpl7a         | 30 kDa  | 0            | 0           | 0            | 7.3499      | 7.3052       | FALSE     |
| Ribosomal protein S6 kinase alpha-3 OS=Mus musculus GN=Rps6ka3 PE=1 SV=2                  | P18654           | Rps6ka3       | 84 kDa  | 0            | 0           | 0            | 3.2666      | 3.4377       | FALSE     |
| Ribosomal protein S6 kinase alpha-4 OS=Mus musculus GN=Rps6ka4 PE=1 SV=2                  | Q9Z2B9           | Rps6ka4       | 86 kDa  | 0            | 0           | 0            | 0.81665     | 0            | FALSE     |
| Ribosomal protein S6 kinase beta-1 OS=Mus musculus GN=Rps6kb1 PE=1 SV=2                   | Q8BSK8           | Rps6kb1       | 59 kDa  | 0            | 0           | 0            | 0           | 1.7189       | FALSE     |
| Ribosome assembly factor mrt4 OS=Mus musculus GN=Mrto4 PE=1 SV=1                          | A2AMU9 (+2)      | Mrto4         | 28 kDa  | 0            | 0           | 0            | 1.225       | 1.2892       | FALSE     |
| Ribosome biogenesis protein WDR12 OS=Mus musculus GN=Wdr12 PE=1 SV=1                      | Q4V9X1 (+1)      | Wdr12         | 47 kDa  | 0            | 0           | 0            | 1.6333      | 0            | FALSE     |
| Ribosome maturation protein SBDS OS=Mus musculus GN=Sbds PE=1 SV=4                        | P70122           | Sbds          | 29 kDa  | 0            | 0           | 0            | 3.6749      | 3.8675       | FALSE     |
| RIKEN cDNA 2900026A02 gene OS=Mus musculus GN=2900026A02Rik PE=1 SV=1                     | A0A1D5RLN6 (+1)  | 2900026A02Rik | 43 kDa  | 0            | 0           | 0            | 0           | 1.2892       | FALSE     |
| RIKEN cDNA 2900064A13, isoform CRA_b OS=Mus musculus GN=Emc7 PE=1 SV=1                    | Q14C26 (+1)      | Emc7          | 26 kDa  | 0            | 0           | 0            | 0.81665     | 1.7189       | FALSE     |
| RIKEN cDNA 5730455P16 gene OS=Mus musculus GN=5730455P16Rik PE=1 SV=1                     | J3KMQ6 (+1)      | 5730455P16Rik | 44 kDa  | 0            | 0           | 0            | 0.81665     | 0            | FALSE     |
| RIKEN cDNA 9530068E07 gene OS=Mus musculus GN=9530068E07Rik PE=1 SV=1                     | A0A0A0MQD4 (+3)  | 9530068E07Rik | 27 kDa  | 0            | 0           | 0            | 0.81665     | 0            | FALSE     |
| RIKEN cDNA C330023M02, isoform CRA_a OS=Mus musculus GN=Naa25 PE=2 SV=1                   | B2RQV1 (+1)      | Naa25         | 112 kDa | 0            | 0           | 0            | 2.0416      | 0.85944      | FALSE     |
| RING-type E3 ubiquitin transferase OS=Mus musculus GN=Arih2 PE=1 SV=1                     | Q3TK92 (+1)      | Arih2         | 58 kDa  | 0            | 0           | 0            | 0.81665     | 0            | FALSE     |
| RNA polymerase II subunit A C-terminal domain phosphatase OS=Mus musculus GN=Ctdp1 PE=1   | Q7TSG2           | Ctdp1         | 105 kDa | 0            | 0           | 0            | 0.81665     | 0            | FALSE     |
| RNA polymerase II-associated protein 3 OS=Mus musculus GN=Rpap3 PE=1 SV=1                 | Q9D706           | Rpap3         | 74 kDa  | 0            | 0           | 0            | 2.45        | 3.4377       | FALSE     |
| RNA-binding protein 12 OS=Mus musculus GN=Rbm12 PE=1 SV=3                                 | Q8R4X3           | Rbm12         | 103 kDa | 0            | 0           | 0            | 0.81665     | 0            | FALSE     |
| RNA-binding protein 26 OS=Mus musculus GN=Rbm26 PE=1 SV=1                                 | E9PYZ7 (+2)      | Rbm26         | 114 kDa | 0            | 0           | 0            | 2.0416      | 2.1486       | FALSE     |
| RNA-binding protein EWS OS=Mus musculus GN=Ewsr1 PE=1 SV=1                                | Q5SUS9 (+3)      | Ewsr1         | 69 kDa  | 0            | 0           | 0            | 3.6749      | 3.008        | FALSE     |
| RNA-binding protein OS=Mus musculus GN=Tsn PE=1 SV=1                                      | Q545E6 (+1)      | Tsn           | 26 kDa  | 0            | 0           | 0            | 0.81665     | 0            | FALSE     |
| Rpl37a protein OS=Mus musculus GN=Rpl37a PE=2 SV=1                                        | Q5M9N6           | Rpl37a        | 9 kDa   | 0            | 0           | 0            | 3.6749      | 4.7269       | FALSE     |
| RuvB-like 1 OS=Mus musculus GN=Ruvbl1 PE=1 SV=1                                           | P60122 (+2)      | Ruvbl1        | 50 kDa  | 0            | 0           | 3.5789       | 5.3082      | 7.7349       | FALSE     |
| RuvB-like helicase OS=Mus musculus GN=Ruvbl2 PE=1 SV=1                                    | Q3TXX7 (+2)      | Ruvbl2        | 51 kDa  | 3.6831       | 0           | 0            | 4.0833      | 3.8675       | FALSE     |
| RWD domain-containing protein 1 OS=Mus musculus GN=Rwdd1 PE=1 SV=1                        | Q9CQK7           | Rwdd1         | 28 kDa  | 0            | 0           | 0            | 1.225       | 1.2892       | FALSE     |
| S-adenosyl-L-methionine-dependent tRNA 4-demethylwyosine synthase OS=Mus musculus GN=Tyw1 | Q8BJM7           | Tyw1          | 82 kDa  | 0            | 0           | 0            | 0           | 0.85944      | FALSE     |
| S-adenosylmethionine synthase isoform type-2 OS=Mus musculus GN=Mat2a PE=1 SV=2           | Q3THS6 (+1)      | Mat2a         | 44 kDa  | 0            | 0           | 0            | 2.45        | 1.7189       | FALSE     |
| S-formylglutathione hydrolase OS=Mus musculus GN=Esd PE=1 SV=1                            | H3BKH6 (+1)      | Esd           | 33 kDa  | 3.6831       | 0           | 7.1579       | 10.616      | 13.321       | FALSE     |
| Sacsin OS=Mus musculus GN=Sacs PE=1 SV=1                                                  | E9QNY8 (+1)      | Sacs          | 521 kDa | 0            | 0           | 0            | 1.225       | 0            | FALSE     |
| SAPS domain family, member 3, isoform CRA_c OS=Mus musculus GN=Ppp6r3 PE=1 SV=1           | G5E8R4 (+1)      | Ppp6r3        | 98 kDa  | 0            | 0           | 0            | 2.8583      | 2.5783       | FALSE     |
| Schlafen 9 OS=Mus musculus GN=Slfn9 PE=1 SV=1                                             | B1ARD6 (+1)      | Slfn9         | 104 kDa | 0            | 0           | 0            | 4.0833      | 1.7189       | FALSE     |
| SCY1-like protein 2 OS=Mus musculus GN=Scyl2 PE=1 SV=1                                    | G5E8J9 (+1)      | Scyl2         | 103 kDa | 0            | 0           | 0            | 0           | 0.85944      | FALSE     |
| Sec1 family domain-containing protein 1 OS=Mus musculus GN=Scfd1 PE=1 SV=1                | Q8BRF7           | Scfd1         | 72 kDa  | 0            | 0           | 0            | 0.81665     | 0.85944      | FALSE     |
| SEC14-like protein 1 OS=Mus musculus GN=Sec14l1 PE=1 SV=1                                 | A8Y5H7           | Sec14l1       | 81 kDa  | 0            | 0           | 0            | 0           | 0.85944      | FALSE     |
| SEC23-interacting protein OS=Mus musculus GN=Sec23ip PE=1 SV=1                            | G3X928 (+1)      | Sec23ip       | 111 kDa | 0            | 0           | 0            | 4.4916      | 3.4377       | FALSE     |
| Sec24 related gene family, member C (S. cerevisiae) OS=Mus musculus GN=Sec24c PE=1 SV=1   | A0A286YD18 (+1)  | Sec24c        | 112 kDa | 0            | 0           | 0            | 4.4916      | 3.8675       | FALSE     |
| Sec24-related gene family, member B (S. cerevisiae) OS=Mus musculus GN=Sec24b PE=1 SV=1   | Q80ZX0           | Sec24b        | 136 kDa | 0            | 0           | 0            | 2.45        | 2.1486       | FALSE     |
| Sec24-related gene family, member D (S. cerevisiae) OS=Mus musculus GN=Sec24d PE=1 SV=1   | Q6NXL1           | Sec24d        | 113 kDa | 0            | 0           | 0            | 4.0833      | 3.8675       | FALSE     |
| Sec62 protein (Fragment) OS=Mus musculus GN=Sec62 PE=2 SV=1                               | Q05DA2 (+1)      | Sec62         | 16 kDa  | 0            | 0           | 0            | 1.6333      | 1.2892       | FALSE     |
| Secernin-2 OS=Mus musculus GN=Scrn2 PE=1 SV=1                                             | Q8VCA8           | Scrn2         | 47 kDa  | 0            | 0           | 0            | 1.225       | 0.85944      | FALSE     |
| Secretory carrier-associated membrane protein OS=Mus musculus GN=Gm45927 PE=2 SV=1        | B2M0S2           | Gm45927       | 89 kDa  | 0            | 0           | 0            | 2.0416      | 2.1486       | FALSE     |
| Selenocysteine-specific elongation factor OS=Mus musculus GN=Eefsec PE=1 SV=2             | Q9JHW4           | Eefsec        | 64 kDa  | 0            | 0           | 0            | 1.6333      | 3.8675       | FALSE     |
| Selenophosphate synthetase 1 OS=Mus musculus GN=Seps1 PE=2 SV=1                           | Q6NZN9 (+1)      | Seps1         | 43 kDa  | 0            | 0           | 0            | 2.0416      | 2.5783       | FALSE     |
| Selenoprotein F OS=Mus musculus GN=Selenof PE=1 SV=1                                      | A0A0R4J0K1 (+1)  | Selenof       | 18 kDa  | 0            | 0           | 0            | 1.225       | 0.85944      | FALSE     |
| Sepiapterin reductase OS=Mus musculus GN=Spr PE=1 SV=1                                    | Q64105 (+1)      | Spr           | 28 kDa  | 0            | 0           | 0            | 4.8999      | 3.8675       | FALSE     |
| Septin-10 OS=Mus musculus GN=Sept10 PE=1 SV=1                                             | Q8C650           | Sept10        | 52 kDa  | 0            | 0           | 0            | 0           | 1.7189       | FALSE     |
| Septin-5 OS=Mus musculus GN=Sept5 PE=1 SV=2                                               | Q9Z2Q6           | Sept5         | 43 kDa  | 0            | 0           | 0            | 1.6333      | 2.5783       | FALSE     |

| Identified Proteins (2666)                                                                             | Accession Number | Alternate ID | MW      | VPSko-biotin | ctrl-biotin | VPSoe-biotin | ctrl lysate | VPSoe lysate | enriched? |
|--------------------------------------------------------------------------------------------------------|------------------|--------------|---------|--------------|-------------|--------------|-------------|--------------|-----------|
| Septin-7 OS=Mus musculus GN=Sept7 PE=1 SV=2                                                            | E9Q1G8           | Sept7        | 51 kDa  | 0            | 6.3914      | 7.1579       | 8.5749      | 8.1647       | FALSE     |
| Septin-8 OS=Mus musculus GN=Sept8 PE=1 SV=1                                                            | B1AQY9 (+3)      | Sept8        | 51 kDa  | 0            | 0           | 0            | 3.2666      | 2.5783       | FALSE     |
| Septin-9 OS=Mus musculus GN=Sept9 PE=1 SV=1                                                            | Q80UG5           | Sept9        | 66 kDa  | 0            | 0           | 0            | 5.3082      | 5.1566       | FALSE     |
| Sequestosome-1 OS=Mus musculus GN=Sqstm1 PE=1 SV=1                                                     | Q64337           | Sqstm1       | 48 kDa  | 0            | 0           | 0            | 1.6333      | 2.5783       | FALSE     |
| Serine hydrolase-like protein OS=Mus musculus GN=Serhl PE=1 SV=1                                       | Q3U3G8 (+2)      | Serhl        | 36 kDa  | 0            | 0           | 0            | 0.81665     | 0.85944      | FALSE     |
| Serine hydroxymethyltransferase (Fragment) OS=Mus musculus GN=Shmt1 PE=1 SV=1                          | G3UY1 (+2)       | Shmt1        | 49 kDa  | 0            | 0           | 0            | 3.6749      | 3.8675       | FALSE     |
| Serine protease HTRA2, mitochondrial OS=Mus musculus GN=Htra2 PE=1 SV=1                                | D3YX27 (+3)      | Htra2        | 46 kDa  | 0            | 0           | 0            | 1.225       | 0.85944      | FALSE     |
| Serine-tRNA ligase, cytoplasmic OS=Mus musculus GN=Sars PE=1 SV=1                                      | Q8C483           | Sars         | 61 kDa  | 0            | 0           | 5.3684       | 8.1665      | 8.5944       | FALSE     |
| Serine/arginine repetitive matrix protein 1 OS=Mus musculus GN=Srrm1 PE=1 SV=1                         | A2A8V8 (+3)      | Srrm1        | 103 kDa | 0            | 0           | 0            | 1.225       | 1.2892       | FALSE     |
| Serine/arginine repetitive matrix protein 2 OS=Mus musculus GN=Srrm2 PE=1 SV=3                         | Q8BT18           | Srrm2        | 295 kDa | 0            | 0           | 0            | 1.6333      | 1.7189       | FALSE     |
| Serine/arginine-rich splicing factor 1 OS=Mus musculus GN=Srsf1 PE=1 SV=3                              | Q6PDM2           | Srsf1        | 28 kDa  | 0            | 0           | 0            | 1.225       | 0.85944      | FALSE     |
| Serine/arginine-rich splicing factor 2 OS=Mus musculus GN=Srsf2 PE=1 SV=4                              | Q62093 (+1)      | Srsf2        | 25 kDa  | 0            | 0           | 0            | 0           | 2.1486       | FALSE     |
| Serine/arginine-rich splicing factor 3 OS=Mus musculus GN=Srsf3 PE=1 SV=1                              | P84104 (+1)      | Srsf3        | 19 kDa  | 0            | 0           | 0            | 1.225       | 1.2892       | FALSE     |
| Serine/arginine-rich splicing factor 6 OS=Mus musculus GN=Srsf6 PE=1 SV=1                              | Q3TWW8           | Srsf6        | 39 kDa  | 0            | 0           | 0            | 0.81665     | 1.7189       | FALSE     |
| Serine/threonine-protein kinase 3 OS=Mus musculus GN=Stk3 PE=1 SV=1                                    | Q9J110           | Stk3         | 57 kDa  | 0            | 0           | 0            | 1.6333      | 2.1486       | FALSE     |
| Serine/threonine-protein kinase A-Raf OS=Mus musculus GN=Araf PE=1 SV=2                                | P04627           | Araf         | 68 kDa  | 0            | 0           | 0            | 1.6333      | 0.85944      | FALSE     |
| Serine/threonine-protein kinase DCLK1 OS=Mus musculus GN=Dclk1 PE=1 SV=1                               | Q9JLM8           | Dclk1        | 84 kDa  | 0            | 0           | 0            | 2.45        | 2.5783       | FALSE     |
| Serine/threonine-protein kinase N2 OS=Mus musculus GN=Pkn2 PE=1 SV=3                                   | Q8BWW9           | Pkn2         | 112 kDa | 0            | 0           | 0            | 2.0416      | 1.7189       | FALSE     |
| Serine/threonine-protein kinase Nek7 OS=Mus musculus GN=Nek7 PE=1 SV=1                                 | Q9ES74           | Nek7         | 35 kDa  | 0            | 0           | 0            | 1.6333      | 1.7189       | FALSE     |
| Serine/threonine-protein kinase OSR1 OS=Mus musculus GN=Oxsr1 PE=1 SV=1                                | Q6P9R2           | Oxsr1        | 58 kDa  | 0            | 0           | 0            | 1.225       | 3.008        | FALSE     |
| Serine/threonine-protein kinase PAK 2 OS=Mus musculus GN=Pak2 PE=1 SV=1                                | Q8CIN4           | Pak2         | 58 kDa  | 0            | 0           | 0            | 4.8999      | 6.4458       | FALSE     |
| Serine/threonine-protein kinase WNK1 OS=Mus musculus GN=Wnk1 PE=1 SV=2                                 | P83741           | Wnk1         | 251 kDa | 0            | 0           | 0            | 2.0416      | 2.1486       | FALSE     |
| Serine/threonine-protein phosphatase (Fragment) OS=Mus musculus GN=Ppp5c PE=1 SV=1                     | F7BX26 (+1)      | Ppp5c        | 54 kDa  | 0            | 0           | 0            | 1.225       | 1.7189       | FALSE     |
| Serine/threonine-protein phosphatase 2A 55 kDa regulatory subunit B OS=Mus musculus GN=Ppp2r2a         | Q3TT94 (+1)      | Ppp2r2a      | 52 kDa  | 0            | 0           | 0            | 2.8583      | 3.4377       | FALSE     |
| Serine/threonine-protein phosphatase 2A activator OS=Mus musculus GN=Ptpa PE=2 SV=1                    | Q8C0E1           | Ptpa         | 37 kDa  | 0            | 0           | 0            | 1.225       | 1.7189       | FALSE     |
| Serine/threonine-protein phosphatase 2A catalytic subunit alpha isoform OS=Mus musculus GN=P63330 (+1) | P63330 (+1)      | Ppp2ca       | 36 kDa  | 3.6831       | 3.1957      | 3.5789       | 4.8999      | 4.2972       | FALSE     |
| Serine/threonine-protein phosphatase 4 catalytic subunit OS=Mus musculus GN=Ppp4c PE=1 SV=1            | P97470 (+1)      | Ppp4c        | 35 kDa  | 0            | 0           | 0            | 1.6333      | 2.1486       | FALSE     |
| Serine/threonine-protein phosphatase 4 regulatory subunit 1 OS=Mus musculus GN=Ppp4r1 PE=1 SV=1        | E9PX53 (+2)      | Ppp4r1       | 105 kDa | 0            | 0           | 0            | 0.81665     | 0.85944      | FALSE     |
| Serine/threonine-protein phosphatase 4 regulatory subunit 2 OS=Mus musculus GN=Ppp4r2 PE=1 SV=1        | A0A0R4J0U2 (+1)  | Ppp4r2       | 46 kDa  | 0            | 0           | 0            | 0.81665     | 1.7189       | FALSE     |
| Serine/threonine-protein phosphatase 6 catalytic subunit OS=Mus musculus GN=Ppp6c PE=1 SV=1            | Q9CQR6           | Ppp6c        | 35 kDa  | 0            | 0           | 0            | 2.45        | 1.2892       | FALSE     |
| Serine/threonine-protein phosphatase 6 regulatory ankyrin repeat subunit A OS=Mus musculus GN=Q505D1   | Q505D1           | Ankrd28      | 113 kDa | 0            | 0           | 0            | 0.81665     | 1.2892       | FALSE     |
| Serine/threonine-protein phosphatase CPPED1 OS=Mus musculus GN=Cpped1 PE=1 SV=1                        | Q8BF56           | Cpped1       | 35 kDa  | 0            | 0           | 0            | 0           | 1.2892       | FALSE     |
| Serine/threonine-protein phosphatase OS=Mus musculus GN=Ppp3cb PE=1 SV=1                               | E0CZ78 (+1)      | Ppp3cb       | 59 kDa  | 0            | 0           | 0            | 1.225       | 0            | FALSE     |
| Serine/threonine-protein phosphatase PGAM5, mitochondrial OS=Mus musculus GN=Pgam5 PE=1 SV=1           | Q8BX10           | Pgam5        | 32 kDa  | 0            | 0           | 0            | 0.81665     | 0.85944      | FALSE     |
| Serine/threonine-protein phosphatase PP1-alpha catalytic subunit OS=Mus musculus GN=Ppp1ca             | P62137 (+1)      | Ppp1ca       | 38 kDa  | 0            | 0           | 0            | 3.6749      | 3.4377       | FALSE     |
| Serine/threonine-protein phosphatase PP1-gamma catalytic subunit OS=Mus musculus GN=Ppp1cc             | P63087 (+2)      | Ppp1cc       | 37 kDa  | 0            | 0           | 0            | 3.6749      | 3.008        | FALSE     |
| Serrate RNA effector molecule homolog OS=Mus musculus GN=Srrt PE=1 SV=1                                | Q99MR6           | Srrt         | 100 kDa | 0            | 0           | 0            | 1.6333      | 1.2892       | FALSE     |
| Serum paraoxonase/arylesterase 2 OS=Mus musculus GN=Pon2 PE=1 SV=2                                     | Q62086           | Pon2         | 40 kDa  | 0            | 0           | 0            | 1.225       | 0            | FALSE     |
| Serum paraoxonase/lactonase 3 OS=Mus musculus GN=Pon3 PE=1 SV=2                                        | Q62087           | Pon3         | 39 kDa  | 0            | 0           | 0            | 1.6333      | 0            | FALSE     |
| SET and MYND domain-containing protein 5 OS=Mus musculus GN=Smyd5 PE=1 SV=2                            | Q3TYX3           | Smyd5        | 47 kDa  | 0            | 0           | 0            | 0.81665     | 1.2892       | FALSE     |
| Set1/Ash2 histone methyltransferase complex subunit ASH2 OS=Mus musculus GN=Ash2l PE=1 SV=1            | Q91X20           | Ash2l        | 68 kDa  | 0            | 0           | 0            | 0           | 0.85944      | FALSE     |
| Sgpl1 protein OS=Mus musculus GN=Sgpl1 PE=2 SV=1                                                       | Q4FK38 (+2)      | Sgpl1        | 64 kDa  | 0            | 0           | 0            | 4.0833      | 2.5783       | FALSE     |
| SH3 domain-binding glutamic acid-rich-like protein OS=Mus musculus GN=Sh3bgrl PE=2 SV=1                | Q3U9A8 (+1)      | Sh3bgrl      | 13 kDa  | 0            | 0           | 0            | 1.6333      | 1.2892       | FALSE     |
| SH3-domain GRB2-like 1 OS=Mus musculus GN=Sh3gl1 PE=1 SV=1                                             | Q3TRJ7 (+2)      | Sh3gl1       | 42 kDa  | 0            | 0           | 0            | 1.225       | 3.4377       | FALSE     |
| SHC SH2 domain-binding protein 1 OS=Mus musculus GN=Shcbp1 PE=1 SV=1                                   | Q9Z179           | Shcbp1       | 76 kDa  | 0            | 0           | 0            | 0           | 1.2892       | FALSE     |
| Short-chain specific acyl-CoA dehydrogenase, mitochondrial OS=Mus musculus GN=Acads PE=1 SV=1          | Q07417           | Acads        | 45 kDa  | 0            | 0           | 0            | 2.45        | 2.1486       | FALSE     |
| Short/branched chain specific acyl-CoA dehydrogenase, mitochondrial OS=Mus musculus GN=Acadsl          | Q9DBL1           | Acadsl       | 48 kDa  | 0            | 0           | 0            | 2.0416      | 1.2892       | FALSE     |
| Sialic acid synthase OS=Mus musculus GN=Nans PE=1 SV=1                                                 | Q9J177           | Nans         | 40 kDa  | 0            | 0           | 0            | 4.0833      | 4.7269       | FALSE     |
| Sigma 1 receptor variant SR-1E OS=Mus musculus GN=Sigmar1 PE=2 SV=1                                    | B7ZJH9 (+1)      | Sigmar1      | 18 kDa  | 0            | 0           | 0            | 0.81665     | 0            | FALSE     |
| Signal peptidase complex catalytic subunit SEC11 OS=Mus musculus GN=Sec11a PE=1 SV=1                   | D3YTS1 (+4)      | Sec11a       | 28 kDa  | 0            | 0           | 0            | 1.225       | 1.7189       | FALSE     |
| Signal peptidase complex subunit 1 OS=Mus musculus GN=Spcs1 PE=2 SV=3                                  | Q9D958           | Spcs1        | 18 kDa  | 0            | 0           | 0            | 0.81665     | 0            | FALSE     |

| Identified Proteins (2666)                                                                     | Accession Number | Alternate ID | MW      | VPSko-biotin | ctrl-biotin | VPSoe-biotin | ctrl lysate | VPSoe lysate | enriched? |
|------------------------------------------------------------------------------------------------|------------------|--------------|---------|--------------|-------------|--------------|-------------|--------------|-----------|
| Signal peptidase complex subunit 3 OS=Mus musculus GN=Spcs3 PE=1 SV=1                          | Q6ZWQ7           | Spcs3        | 20 kDa  | 0            | 0           | 0            | 0.81665     | 0            | FALSE     |
| Signal recognition particle 54 kDa protein OS=Mus musculus GN=Srp54 PE=1 SV=2                  | P14576           | Srp54        | 56 kDa  | 0            | 0           | 0            | 0           | 0.85944      | FALSE     |
| Signal recognition particle receptor subunit alpha OS=Mus musculus GN=Srpra PE=1 SV=1          | Q9DBG7           | Srpra        | 70 kDa  | 0            | 0           | 0            | 3.2666      | 2.1486       | FALSE     |
| Signal recognition particle subunit SRP68 OS=Mus musculus GN=Srp68 PE=1 SV=2                   | Q8BMA6           | Srp68        | 71 kDa  | 0            | 0           | 0            | 2.0416      | 0.85944      | FALSE     |
| Signal recognition particle subunit SRP72 OS=Mus musculus GN=Srp72 PE=1 SV=1                   | F8VQC1           | Srp72        | 75 kDa  | 0            | 0           | 0            | 2.8583      | 2.5783       | FALSE     |
| Signal sequence receptor, delta, isoform CRA_b OS=Mus musculus GN=Ssr4 PE=1 SV=1               | Q3TVJ8 (+2)      | Ssr4         | 19 kDa  | 0            | 0           | 0            | 1.6333      | 2.5783       | FALSE     |
| Signal transducer and activator of transcription 3 OS=Mus musculus GN=Stat3 PE=1 SV=2          | P42227 (+2)      | Stat3        | 88 kDa  | 0            | 0           | 0            | 3.2666      | 3.008        | FALSE     |
| Signal transducer and activator of transcription 5B OS=Mus musculus GN=Stat5b PE=1 SV=1        | P42232           | Stat5b       | 90 kDa  | 0            | 0           | 0            | 1.6333      | 0.85944      | FALSE     |
| Signal transducer and activator of transcription OS=Mus musculus GN=Stat2 PE=2 SV=1            | Q9QZE4           | Stat2        | 106 kDa | 0            | 0           | 0            | 2.0416      | 0            | FALSE     |
| Signal transducer and activator of transcription OS=Mus musculus GN=Stat6 PE=2 SV=1            | Q8R4D4           | Stat6        | 94 kDa  | 0            | 0           | 0            | 1.225       | 1.2892       | FALSE     |
| Signal transducing adapter molecule 1 OS=Mus musculus GN=Stam PE=1 SV=3                        | P70297 (+2)      | Stam         | 60 kDa  | 0            | 0           | 0            | 0.81665     | 1.2892       | FALSE     |
| Signal transducing adapter molecule 2 OS=Mus musculus GN=Stam2 PE=1 SV=1                       | O88811 (+1)      | Stam2        | 57 kDa  | 0            | 0           | 0            | 1.225       | 0            | FALSE     |
| Single-stranded DNA binding protein 1 OS=Mus musculus GN=Ssbp1 PE=1 SV=1                       | Q8R2K3           | Ssbp1        | 17 kDa  | 0            | 0           | 0            | 1.225       | 1.7189       | FALSE     |
| Sister chromatid cohesion protein PDS5 homolog A OS=Mus musculus GN=Pds5a PE=1 SV=3            | Q6A026           | Pds5a        | 150 kDa | 0            | 0           | 0            | 2.0416      | 1.2892       | FALSE     |
| Sister chromatid cohesion protein PDS5 homolog B OS=Mus musculus GN=Pds5b PE=1 SV=1            | F8WHU5 (+1)      | Pds5b        | 165 kDa | 0            | 0           | 0            | 2.0416      | 2.1486       | FALSE     |
| Slk protein OS=Mus musculus GN=Slk PE=2 SV=1                                                   | A2RRK3 (+1)      | Slk          | 138 kDa | 0            | 0           | 0            | 4.0833      | 3.8675       | FALSE     |
| Small acidic protein OS=Mus musculus GN=Smap PE=1 SV=1                                         | Q9R0P4           | Smap         | 20 kDa  | 0            | 0           | 0            | 1.6333      | 1.2892       | FALSE     |
| Small glutamine-rich tetratricopeptide repeat-containing protein alpha OS=Mus musculus GN=Sgta | Q8BJU0           | Sgta         | 34 kDa  | 0            | 0           | 0            | 1.6333      | 3.008        | FALSE     |
| Small nuclear ribonucleoprotein Sm D3 OS=Mus musculus GN=Snrdp3 PE=1 SV=1                      | P62320 (+1)      | Snrdp3       | 14 kDa  | 0            | 0           | 0            | 0.81665     | 0.85944      | FALSE     |
| Small ubiquitin-related modifier 2 OS=Mus musculus GN=Sumo2 PE=1 SV=1                          | D3Z794 (+2)      | Sumo2        | 8 kDa   | 0            | 0           | 0            | 0.81665     | 1.2892       | FALSE     |
| Snx4 protein OS=Mus musculus PE=2 SV=1                                                         | Q80X54 (+1)      |              | 47 kDa  | 0            | 0           | 0            | 2.45        | 1.2892       | FALSE     |
| Sodium-coupled neutral amino acid transporter 2 OS=Mus musculus GN=Slc38a2 PE=1 SV=1           | Q8CFE6           | Slc38a2      | 56 kDa  | 0            | 0           | 0            | 0           | 0.85944      | FALSE     |
| Sorbitol dehydrogenase OS=Mus musculus GN=Sord PE=1 SV=3                                       | Q64442           | Sord         | 38 kDa  | 0            | 0           | 0            | 0.81665     | 1.2892       | FALSE     |
| Sorcin OS=Mus musculus GN=Sri PE=1 SV=1                                                        | Q6P069           | Sri          | 22 kDa  | 0            | 0           | 0            | 1.6333      | 3.008        | FALSE     |
| Sorting and assembly machinery component 50 homolog OS=Mus musculus GN=Samm50 PE=1 SV=1        | Q8BGH2           | Samm50       | 52 kDa  | 0            | 0           | 0            | 0.81665     | 1.7189       | FALSE     |
| Sorting nexin 3, isoform CRA_b OS=Mus musculus GN=Snx3 PE=1 SV=1                               | Q78ZM0 (+2)      | Snx3         | 19 kDa  | 0            | 0           | 0            | 2.0416      | 3.008        | FALSE     |
| Sorting nexin OS=Mus musculus GN=Snx5 PE=2 SV=1                                                | Q3TJN6 (+1)      | Snx5         | 47 kDa  | 0            | 0           | 0            | 0.81665     | 1.7189       | FALSE     |
| Sorting nexin-18 OS=Mus musculus GN=Snx18 PE=1 SV=1                                            | Q91ZR2           | Snx18        | 68 kDa  | 0            | 0           | 0            | 1.6333      | 0.85944      | FALSE     |
| Sorting nexin-2 OS=Mus musculus GN=Snx2 PE=1 SV=2                                              | Q9CWK8           | Snx2         | 58 kDa  | 0            | 0           | 0            | 4.4916      | 3.8675       | FALSE     |
| Sorting nexin-27 OS=Mus musculus GN=Snx27 PE=1 SV=2                                            | Q3UHD6           | Snx27        | 61 kDa  | 0            | 0           | 0            | 1.225       | 2.5783       | FALSE     |
| Sorting nexin-6 OS=Mus musculus GN=Snx6 PE=1 SV=2                                              | Q6P8X1           | Snx6         | 47 kDa  | 0            | 0           | 0            | 2.0416      | 1.2892       | FALSE     |
| Sorting nexin-7 OS=Mus musculus GN=Snx7 PE=1 SV=1                                              | F8WI30           | Snx7         | 51 kDa  | 0            | 0           | 0            | 3.2666      | 3.008        | FALSE     |
| SPARC OS=Mus musculus GN=Sparc PE=1 SV=1                                                       | AOA11LSSH9 (+3)  | Sparc        | 38 kDa  | 0            | 0           | 0            | 1.6333      | 2.5783       | FALSE     |
| Spastic paraplegia 20, spartin (Troyer syndrome) homolog (human) OS=Mus musculus GN=Spg20      | D3Z3F8 (+2)      | Spg20        | 63 kDa  | 0            | 0           | 0            | 1.6333      | 2.1486       | FALSE     |
| Spectrin alpha chain, non-erythrocytic 1 OS=Mus musculus GN=Sptan1 PE=1 SV=4                   | P16546           | Sptan1       | 285 kDa | 0            | 3.1957      | 0            | 9.7998      | 4.2972       | FALSE     |
| Spectrin beta chain, non-erythrocytic 1 OS=Mus musculus GN=Sptbn1 PE=1 SV=2                    | Q62261           | Sptbn1       | 274 kDa | 0            | 4.7936      | 0            | 11.433      | 6.4458       | FALSE     |
| Sperm-associated antigen 7 OS=Mus musculus GN=Spag7 PE=1 SV=1                                  | Q7TNE3           | Spag7        | 26 kDa  | 0            | 0           | 0            | 1.225       | 1.2892       | FALSE     |
| Sphingosine-1-phosphate phosphatase 1, isoform CRA_a OS=Mus musculus GN=Sgpp1 PE=1 SV=1        | Q3UDY2 (+1)      | Sgpp1        | 48 kDa  | 0            | 0           | 0            | 0.81665     | 0.85944      | FALSE     |
| Spliceosome RNA helicase Ddx39b OS=Mus musculus GN=Ddx39b PE=1 SV=1                            | Q9Z1N5           | Ddx39b       | 49 kDa  | 0            | 0           | 0            | 2.0416      | 3.4377       | FALSE     |
| Splicing factor 1 OS=Mus musculus GN=Sf1 PE=1 SV=1                                             | D3YZC9           | Sf1          | 62 kDa  | 0            | 0           | 0            | 2.0416      | 2.1486       | FALSE     |
| Splicing factor 3a, subunit 3 OS=Mus musculus GN=Sf3a3 PE=1 SV=1                               | Q58E59 (+1)      | Sf3a3        | 59 kDa  | 0            | 0           | 0            | 0.81665     | 0            | FALSE     |
| Splicing factor 3b, subunit 3 OS=Mus musculus GN=Sf3b3 PE=2 SV=1                               | B2RSV4 (+1)      | Sf3b3        | 136 kDa | 0            | 0           | 0            | 5.3082      | 4.7269       | FALSE     |
| Squamous cell carcinoma antigen recognized by T-cells 3 OS=Mus musculus GN=Sart3 PE=1 SV=1     | Q9JLI8           | Sart3        | 110 kDa | 0            | 0           | 0            | 2.0416      | 3.4377       | FALSE     |
| Src substrate cortactin OS=Mus musculus GN=Cttn PE=1 SV=2                                      | Q60598           | Cttn         | 61 kDa  | 0            | 0           | 0            | 4.4916      | 3.8675       | FALSE     |
| SRSF protein kinase 1 OS=Mus musculus GN=Srpk1 PE=1 SV=2                                       | O70551 (+1)      | Srpk1        | 73 kDa  | 0            | 0           | 0            | 0           | 1.2892       | FALSE     |
| StAR-related lipid transfer protein 13 OS=Mus musculus GN=Stard13 PE=1 SV=5                    | Q923Q2           | Stard13      | 125 kDa | 0            | 0           | 0            | 0           | 0.85944      | FALSE     |
| Stathmin OS=Mus musculus GN=Stmn1 PE=1 SV=1                                                    | D3Z5N2 (+4)      | Stmn1        | 17 kDa  | 0            | 0           | 0            | 0.81665     | 0.85944      | FALSE     |
| Sterile alpha motif domain-containing protein 9-like OS=Mus musculus GN=Samd9l PE=1 SV=1       | E9PX59 (+1)      | Samd9l       | 182 kDa | 0            | 0           | 0            | 5.3082      | 0            | FALSE     |
| Stimulator of interferon genes protein OS=Mus musculus GN=Tmem173 PE=1 SV=2                    | Q3TBT3           | Tmem173      | 43 kDa  | 0            | 0           | 0            | 0.81665     | 0            | FALSE     |
| Stomatin-like protein 2, mitochondrial OS=Mus musculus GN=Stoml2 PE=1 SV=1                     | Q99JB2           | Stoml2       | 38 kDa  | 0            | 0           | 0            | 2.45        | 1.7189       | FALSE     |
| Stonin-1 OS=Mus musculus GN=Ston1 PE=1 SV=2                                                    | Q8CDJ8           | Ston1        | 82 kDa  | 0            | 0           | 0            | 1.225       | 1.2892       | FALSE     |

| Identified Proteins (2666)                                                                                           | Accession Number | Alternate ID | MW      | VPSko-biotin | ctrl-biotin | VPSoe-biotin | ctrl lysate | VPSoe lysate | enriched? |
|----------------------------------------------------------------------------------------------------------------------|------------------|--------------|---------|--------------|-------------|--------------|-------------|--------------|-----------|
| Striatin OS=Mus musculus GN=Strn PE=1 SV=1                                                                           | F8WH41 (+1)      | Strn         | 69 kDa  | 0            | 0           | 0            | 1.225       | 1.2892       | FALSE     |
| Striatin-3 OS=Mus musculus GN=Strn3 PE=1 SV=1                                                                        | B2RQS1           | Strn3        | 78 kDa  | 0            | 0           | 0            | 1.6333      | 0.85944      | FALSE     |
| Stromal cell-derived factor 2 OS=Mus musculus GN=Sdf2 PE=1 SV=1                                                      | A0A0R4IZW9 (+2)  | Sdf2         | 24 kDa  | 0            | 0           | 0            | 1.225       | 0.85944      | FALSE     |
| Stromal cell-derived factor 2-like protein 1 OS=Mus musculus GN=Sdf2l1 PE=1 SV=2                                     | Q9ESP1           | Sdf2l1       | 24 kDa  | 0            | 0           | 0            | 0.81665     | 0            | FALSE     |
| Structural maintenance of chromosomes flexible hinge domain-containing protein 1 OS=Mus musculus GN=Smchd1 PE=1 SV=1 | Q6P5D8           | Smchd1       | 226 kDa | 0            | 0           | 0            | 3.6749      | 4.2972       | FALSE     |
| Structural maintenance of chromosomes protein 1A OS=Mus musculus GN=Smc1a PE=1 SV=4                                  | Q9CU62           | Smc1a        | 143 kDa | 0            | 0           | 0            | 0.81665     | 1.2892       | FALSE     |
| Structural maintenance of chromosomes protein 2 OS=Mus musculus GN=Smc2 PE=1 SV=2                                    | Q8CG48           | Smc2         | 134 kDa | 3.6831       | 0           | 0            | 5.7166      | 6.4458       | FALSE     |
| Structural maintenance of chromosomes protein OS=Mus musculus GN=Smc3 PE=1 SV=1                                      | Q1HL32 (+2)      | Smc3         | 142 kDa | 0            | 0           | 0            | 6.1249      | 5.1566       | FALSE     |
| Structural maintenance of chromosomes protein OS=Mus musculus GN=Smc4 PE=1 SV=1                                      | E9Q2X6 (+1)      | Smc4         | 144 kDa | 0            | 0           | 0            | 4.4916      | 2.1486       | FALSE     |
| Succinate dehydrogenase [ubiquinone] flavoprotein subunit, mitochondrial OS=Mus musculus GN=Q8K2B3                   | Q8K2B3           | Sdha         | 73 kDa  | 0            | 3.1957      | 5.3684       | 7.3499      | 8.1647       | FALSE     |
| Succinate dehydrogenase [ubiquinone] iron-sulfur subunit, mitochondrial OS=Mus musculus GN=Q9CQA3                    | Q9CQA3           | Sdhb         | 32 kDa  | 0            | 0           | 0            | 3.2666      | 3.8675       | FALSE     |
| Succinate dehydrogenase cytochrome b560 subunit, mitochondrial OS=Mus musculus GN=Sdhc PE=1 SV=1                     | Q9CZB0           | Sdhc         | 18 kDa  | 0            | 0           | 0            | 1.6333      | 1.2892       | FALSE     |
| Succinate-CoA ligase [ADP/GDP-forming] subunit alpha, mitochondrial OS=Mus musculus GN=Q9WUM5                        | Q9WUM5           | Sudlg1       | 36 kDa  | 0            | 0           | 0            | 2.0416      | 1.2892       | FALSE     |
| Succinate-CoA ligase [GDP-forming] subunit beta, mitochondrial OS=Mus musculus GN=Q9Z2I8                             | Q9Z2I8           | Sudlg2       | 47 kDa  | 0            | 0           | 0            | 2.8583      | 3.008        | FALSE     |
| Succinate-CoA ligase subunit beta (Fragment) OS=Mus musculus GN=Sucla2 PE=2 SV=1                                     | Q3UCC6 (+1)      | Sudla2       | 51 kDa  | 0            | 0           | 0            | 2.45        | 1.7189       | FALSE     |
| Sulfatase-modifying factor 1 OS=Mus musculus GN=Sumf1 PE=1 SV=2                                                      | Q8R0F3           | Sumf1        | 41 kDa  | 0            | 0           | 0            | 1.225       | 0            | FALSE     |
| Sulfurtransferase OS=Mus musculus GN=Mpst PE=1 SV=1                                                                  | Q3UW66 (+2)      | Mpst         | 33 kDa  | 0            | 0           | 0            | 1.225       | 0            | FALSE     |
| SUMO-activating enzyme subunit 1 OS=Mus musculus GN=Sae1 PE=1 SV=1                                                   | Q9R1T2           | Sae1         | 39 kDa  | 0            | 0           | 0            | 4.8999      | 3.008        | FALSE     |
| SUMO-activating enzyme subunit 2 OS=Mus musculus GN=Uba2 PE=1 SV=1                                                   | Q9Z1F9           | Uba2         | 71 kDa  | 0            | 0           | 0            | 4.4916      | 5.1566       | FALSE     |
| SUMO-conjugating enzyme UBC9 (Fragment) OS=Mus musculus GN=Ube2i PE=1 SV=1                                           | G3UYPO (+1)      | Ube2i        | 12 kDa  | 0            | 0           | 0            | 0.81665     | 1.7189       | FALSE     |
| SUN domain-containing protein 2 OS=Mus musculus GN=Sun2 PE=1 SV=3                                                    | Q8BJS4           | Sun2         | 82 kDa  | 0            | 0           | 0            | 2.0416      | 1.7189       | FALSE     |
| Superoxide dismutase [Cu-Zn] OS=Mus musculus GN=Sod1 PE=1 SV=2                                                       | P08228           | Sod1         | 16 kDa  | 3.6831       | 3.1957      | 0            | 5.7166      | 6.4458       | FALSE     |
| Superoxide dismutase [Mn], mitochondrial OS=Mus musculus GN=Sod2 PE=1 SV=3                                           | P09671 (+1)      | Sod2         | 25 kDa  | 0            | 0           | 0            | 1.6333      | 1.2892       | FALSE     |
| Suppressor of Ty 16 OS=Mus musculus GN=Supt16 PE=1 SV=1                                                              | G3X956           | Supt16       | 120 kDa | 0            | 0           | 0            | 6.1249      | 6.4458       | FALSE     |
| Surfeit gene 4, isoform CRA_a OS=Mus musculus GN=Surf4 PE=1 SV=1                                                     | Q545Q2 (+1)      | Surf4        | 30 kDa  | 0            | 0           | 0            | 1.225       | 0            | FALSE     |
| Survival of motor neuron-related-splicing factor 30 OS=Mus musculus GN=Smndc1 PE=1 SV=1                              | Q8BGT7           | Smndc1       | 27 kDa  | 0            | 0           | 0            | 0           | 0.85944      | FALSE     |
| SWI/SNF complex subunit SMARCC1 OS=Mus musculus GN=Smrcc1 PE=1 SV=2                                                  | P97496 (+1)      | Smrcc1       | 123 kDa | 0            | 0           | 0            | 1.225       | 1.2892       | FALSE     |
| Switch-associated protein 70 OS=Mus musculus GN=Swap70 PE=1 SV=2                                                     | Q6A028           | Swap70       | 69 kDa  | 0            | 0           | 0            | 1.6333      | 0            | FALSE     |
| Synaptic functional regulator FMR1 OS=Mus musculus GN=Fmr1 PE=1 SV=1                                                 | P35922 (+1)      | Fmr1         | 69 kDa  | 0            | 0           | 0            | 2.45        | 2.1486       | FALSE     |
| Synaptobrevin homolog YKT6 OS=Mus musculus GN=Ykt6 PE=1 SV=1                                                         | Q9CQW1           | Ykt6         | 22 kDa  | 0            | 0           | 0            | 2.0416      | 2.5783       | FALSE     |
| Synaptojanin-2-binding protein OS=Mus musculus GN=Synj2bp PE=1 SV=1                                                  | Q9D6K5           | Synj2bp      | 16 kDa  | 0            | 0           | 0            | 0.81665     | 0.85944      | FALSE     |
| Syntaxin 5A OS=Mus musculus GN=Stx5a PE=1 SV=1                                                                       | H3BJ02 (+1)      | Stx5a        | 29 kDa  | 0            | 0           | 0            | 0           | 0.85944      | FALSE     |
| Syntaxin-4 OS=Mus musculus GN=Stx4 PE=1 SV=1                                                                         | P70452           | Stx4         | 34 kDa  | 0            | 0           | 0            | 1.225       | 0.85944      | FALSE     |
| Syntaxin-binding protein 1 OS=Mus musculus GN=Stxbp1 PE=1 SV=2                                                       | O08599           | Stxbp1       | 68 kDa  | 0            | 0           | 0            | 2.0416      | 1.7189       | FALSE     |
| Syntaxin-binding protein 3 OS=Mus musculus GN=Stxbp3 PE=1 SV=1                                                       | Q60770           | Stxbp3       | 68 kDa  | 0            | 0           | 0            | 1.225       | 0            | FALSE     |
| TANK-binding kinase 1 OS=Mus musculus GN=Tbk1 PE=1 SV=1                                                              | A1L361 (+1)      | Tbk1         | 83 kDa  | 0            | 0           | 0            | 0.81665     | 0.85944      | FALSE     |
| TAP1-cas OS=Mus musculus castaneus GN=Tap1 PE=2 SV=1                                                                 | Q64333 (+1)      | Tap1         | 79 kDa  | 0            | 0           | 0            | 2.8583      | 0            | FALSE     |
| Tapasin OS=Mus musculus GN=Tapbp PE=1 SV=1                                                                           | Q3TCU5 (+6)      | Tapbp        | 50 kDa  | 0            | 0           | 0            | 1.6333      | 1.2892       | FALSE     |
| Taxilin alpha, isoform CRA_a OS=Mus musculus GN=Txlna PE=2 SV=1                                                      | Q3UD58 (+1)      | Txlna        | 62 kDa  | 0            | 0           | 0            | 1.225       | 1.2892       | FALSE     |
| TBC1 domain family member 15 OS=Mus musculus GN=Tbc1d15 PE=2 SV=1                                                    | Q4TVN0 (+2)      | Tbc1d15      | 76 kDa  | 0            | 0           | 0            | 2.45        | 3.008        | FALSE     |
| TBC1 domain family member 4 OS=Mus musculus GN=Tbc1d4 PE=1 SV=1                                                      | E0CX53 (+1)      | Tbc1d4       | 147 kDa | 0            | 0           | 0            | 0           | 1.2892       | FALSE     |
| TBC1 domain family member 8B OS=Mus musculus GN=Tbc1d8b PE=1 SV=1                                                    | A3KGB4 (+1)      | Tbc1d8b      | 128 kDa | 0            | 0           | 0            | 1.6333      | 0            | FALSE     |
| Tctex-1 OS=Mus musculus PE=2 SV=1                                                                                    | A1E5T5 (+1)      | Tctex1       | 12 kDa  | 0            | 0           | 0            | 0.81665     | 0.85944      | FALSE     |
| Tensin-3 OS=Mus musculus GN=Tns3 PE=1 SV=1                                                                           | Q5SSZ5           | Tns3         | 156 kDa | 0            | 0           | 0            | 3.6749      | 5.1566       | FALSE     |
| Terminal uridylyltransferase 7 OS=Mus musculus GN=Zcchc6 PE=1 SV=1                                                   | E9PUA2 (+1)      | Zcchc6       | 167 kDa | 0            | 0           | 0            | 1.6333      | 0            | FALSE     |
| Testin OS=Mus musculus GN=Tes PE=1 SV=2                                                                              | Q921W7           | Tes          | 48 kDa  | 0            | 0           | 0            | 9.3915      | 9.0241       | FALSE     |
| Testis-expressed gene 264 OS=Mus musculus GN=Tex264 PE=1 SV=1                                                        | E9Q137 (+1)      | Tex264       | 34 kDa  | 0            | 0           | 0            | 1.225       | 0.85944      | FALSE     |
| Testis-expressed protein 30 OS=Mus musculus GN=Tex30 PE=1 SV=1                                                       | Q3TUU5           | Tex30        | 25 kDa  | 0            | 0           | 0            | 0           | 0.85944      | FALSE     |
| Tetraspanin OS=Mus musculus GN=Tspan6 PE=2 SV=1                                                                      | Q3TV84 (+1)      | Tspan6       | 27 kDa  | 0            | 0           | 0            | 0           | 0.85944      | FALSE     |
| Tetraspanin-31 OS=Mus musculus GN=Tspan31 PE=1 SV=1                                                                  | Q9CQ88           | Tspan31      | 23 kDa  | 0            | 0           | 0            | 0           | 0.85944      | FALSE     |
| Tetratricopeptide repeat domain 37 OS=Mus musculus GN=Ttc37 PE=1 SV=1                                                | F8VPK0           | Ttc37        | 174 kDa | 0            | 0           | 0            | 2.45        | 1.7189       | FALSE     |

| Identified Proteins (2666)                                                                   | Accession Number | Alternate ID | MW      | VPSko-biotin | ctrl-biotin | VPSoe-biotin | ctrl lysate | VPSoe lysate | enriched? |
|----------------------------------------------------------------------------------------------|------------------|--------------|---------|--------------|-------------|--------------|-------------|--------------|-----------|
| Tetratricopeptide repeat protein 1 OS=Mus musculus GN=Ttc1 PE=1 SV=1                         | Q91Z38           | Ttc1         | 33 kDa  | 0            | 0           | 0            | 0           | 0.85944      | FALSE     |
| Tetratricopeptide repeat protein 33 OS=Mus musculus GN=Ttc33 PE=1 SV=1                       | Q9D6K7           | Ttc33        | 29 kDa  | 0            | 0           | 0            | 0           | 0.85944      | FALSE     |
| Thioredoxin domain-containing protein 17 OS=Mus musculus GN=Txndc17 PE=1 SV=1                | Q9CQM5           | Txndc17      | 14 kDa  | 0            | 0           | 0            | 2.0416      | 2.1486       | FALSE     |
| Thioredoxin domain-containing protein 9 (Fragment) OS=Mus musculus GN=Txndc9 PE=1 SV=1       | A0A0A6YWP9 (+2)  | Txndc9       | 20 kDa  | 0            | 0           | 0            | 0.81665     | 0.85944      | FALSE     |
| Thioredoxin reductase 1, cytoplasmic OS=Mus musculus GN=Txnrd1 PE=1 SV=3                     | Q9JMH6           | Txnrd1       | 67 kDa  | 0            | 3.1957      | 0            | 5.3082      | 6.4458       | FALSE     |
| Thioredoxin-related transmembrane protein 1 OS=Mus musculus GN=Tmx1 PE=1 SV=1                | Q8VBT0           | Tmx1         | 31 kDa  | 0            | 0           | 0            | 0           | 0.85944      | FALSE     |
| Thioredoxin-related transmembrane protein 2 OS=Mus musculus GN=Tmx2 PE=1 SV=1                | D3Z2J6 (+1)      | Tmx2         | 30 kDa  | 0            | 0           | 0            | 0.81665     | 0            | FALSE     |
| THO complex subunit 4 OS=Mus musculus GN=Alyref PE=1 SV=3                                    | O08583           | Alyref       | 27 kDa  | 0            | 0           | 0            | 1.225       | 1.2892       | FALSE     |
| Threonine-tRNA ligase, cytoplasmic OS=Mus musculus GN=Tars PE=1 SV=2                         | Q9D0R2           | Tars         | 83 kDa  | 0            | 3.1957      | 5.3684       | 11.841      | 13.751       | FALSE     |
| THUMP domain-containing protein 1 OS=Mus musculus GN=Thumpd1 PE=1 SV=1                       | Q99J36           | Thumpd1      | 39 kDa  | 0            | 0           | 0            | 1.225       | 0            | FALSE     |
| Thy-1 membrane glycoprotein (Fragment) OS=Mus musculus GN=Thy1 PE=1 SV=1                     | A0A11LSUX8 (+2)  | Thy1         | 14 kDa  | 0            | 0           | 0            | 1.225       | 0            | FALSE     |
| Thymidine kinase, cytosolic OS=Mus musculus GN=Tk1 PE=1 SV=3                                 | P04184           | Tk1          | 26 kDa  | 0            | 0           | 0            | 1.225       | 2.1486       | FALSE     |
| Thymidylate synthase OS=Mus musculus GN=Tyms PE=1 SV=1                                       | P07607 (+2)      | Tyms         | 35 kDa  | 0            | 0           | 0            | 1.6333      | 3.008        | FALSE     |
| Thymocyte nuclear protein 1 OS=Mus musculus GN=Thyn1 PE=1 SV=1                               | Q91YJ3           | Thyn1        | 26 kDa  | 0            | 0           | 0            | 0.81665     | 0.85944      | FALSE     |
| Thyroid hormone receptor interactor 11 OS=Mus musculus GN=Trip11 PE=1 SV=1                   | E9Q512           | Trip11       | 226 kDa | 0            | 0           | 0            | 1.225       | 0            | FALSE     |
| Thyroid hormone receptor interactor 6 OS=Mus musculus GN=Trip6 PE=1 SV=1                     | B2RS30 (+2)      | Trip6        | 51 kDa  | 0            | 0           | 0            | 2.45        | 2.1486       | FALSE     |
| Tight junction protein ZO-1 OS=Mus musculus GN=Tjp1 PE=1 SV=2                                | P39447           | Tjp1         | 195 kDa | 0            | 0           | 0            | 0.81665     | 1.2892       | FALSE     |
| TIP41-like protein OS=Mus musculus GN=Tipr1 PE=1 SV=1                                        | Q8BH58           | Tipr1        | 31 kDa  | 0            | 0           | 0            | 1.6333      | 2.1486       | FALSE     |
| Tissue-type plasminogen activator OS=Mus musculus GN=Plat PE=1 SV=3                          | P11214           | Plat         | 63 kDa  | 0            | 0           | 0            | 0           | 1.2892       | FALSE     |
| TNFRSF1A-associated via death domain OS=Mus musculus GN=Tradd PE=1 SV=1                      | B2RRZ7 (+1)      | Tradd        | 35 kDa  | 0            | 0           | 0            | 0.81665     | 1.2892       | FALSE     |
| Torsin-1A-interacting protein 1 OS=Mus musculus GN=Tor1aip1 PE=1 SV=3                        | Q921T2           | Tor1aip1     | 67 kDa  | 0            | 0           | 0            | 1.225       | 0.85944      | FALSE     |
| Torsin-1A-interacting protein 2 OS=Mus musculus GN=Tor1aip2 PE=1 SV=1                        | Q8BYU6           | Tor1aip2     | 54 kDa  | 0            | 0           | 0            | 0.81665     | 0            | FALSE     |
| Torsin-3A OS=Mus musculus GN=Tor3a PE=1 SV=2                                                 | Q9ER38           | Tor3a        | 44 kDa  | 0            | 0           | 0            | 1.6333      | 0            | FALSE     |
| Transaldolase OS=Mus musculus GN=Taldo1 PE=1 SV=1                                            | A0A1B0GR11 (+1)  | Taldo1       | 42 kDa  | 0            | 0           | 0            | 4.0833      | 3.8675       | FALSE     |
| Transcription elongation factor A protein 1 OS=Mus musculus GN=Tcea1 PE=1 SV=2               | P10711 (+1)      | Tcea1        | 34 kDa  | 0            | 0           | 0            | 5.7166      | 5.1566       | FALSE     |
| Transcription elongation factor SPT5 OS=Mus musculus GN=Supt5h PE=1 SV=1                     | O55201           | Supt5h       | 121 kDa | 0            | 0           | 0            | 2.8583      | 2.5783       | FALSE     |
| Transcription factor BTF3 OS=Mus musculus GN=Btf3 PE=1 SV=3                                  | Q64152           | Btf3         | 22 kDa  | 0            | 0           | 0            | 3.2666      | 3.008        | FALSE     |
| Transcription factor BTF3 OS=Mus musculus GN=Btf3l4 PE=1 SV=1                                | A2A7Z4 (+1)      | Btf3l4       | 17 kDa  | 0            | 0           | 0            | 0.81665     | 0            | FALSE     |
| Transcriptional coactivator YAP1 OS=Mus musculus GN=Yap1 PE=1 SV=2                           | P46938           | Yap1         | 52 kDa  | 0            | 0           | 0            | 2.8583      | 2.1486       | FALSE     |
| Transcriptional repressor p66 alpha OS=Mus musculus GN=Gatad2a PE=1 SV=1                     | E9QMN5 (+1)      | Gatad2a      | 67 kDa  | 0            | 0           | 0            | 0.81665     | 0.85944      | FALSE     |
| Transducin beta-like protein 2 OS=Mus musculus GN=Tbl2 PE=1 SV=2                             | Q9R099           | Tbl2         | 50 kDa  | 0            | 0           | 0            | 4.0833      | 3.8675       | FALSE     |
| Transforming growth factor beta-1-induced transcript 1 protein OS=Mus musculus GN=Tgfb1i1 P  | Q62219           | Tgfb1i1      | 50 kDa  | 0            | 0           | 0            | 3.2666      | 0            | FALSE     |
| Transketolase OS=Mus musculus GN=Tkt PE=1 SV=1                                               | P40142           | Tkt          | 68 kDa  | 9.2077       | 11.185      | 14.316       | 17.558      | 21.916       | FALSE     |
| Translation initiation factor eIF-2B subunit epsilon OS=Mus musculus GN=Eif2b5 PE=1 SV=1     | Q8CHW4           | Eif2b5       | 80 kDa  | 0            | 0           | 0            | 2.45        | 2.5783       | FALSE     |
| Translocation protein SEC63 homolog OS=Mus musculus GN=Sec63 PE=1 SV=4                       | Q8VHE0           | Sec63        | 88 kDa  | 0            | 0           | 0            | 2.8583      | 2.5783       | FALSE     |
| Transmembrane 9 superfamily member 3 OS=Mus musculus GN=Tm9sf3 PE=1 SV=1                     | Q9ET30           | Tm9sf3       | 68 kDa  | 0            | 0           | 0            | 3.2666      | 3.4377       | FALSE     |
| Transmembrane 9 superfamily member 4 OS=Mus musculus GN=Tm9sf4 PE=1 SV=1                     | Q8BH24           | Tm9sf4       | 75 kDa  | 0            | 0           | 0            | 2.45        | 2.1486       | FALSE     |
| Transmembrane 9 superfamily member OS=Mus musculus GN=Tm9sf1 PE=1 SV=1                       | D3Z6X7 (+2)      | Tm9sf1       | 67 kDa  | 0            | 0           | 0            | 0           | 1.2892       | FALSE     |
| Transmembrane 9 superfamily member OS=Mus musculus GN=Tm9sf2 PE=2 SV=1                       | Q8C7F9           | Tm9sf2       | 75 kDa  | 0            | 0           | 0            | 2.0416      | 2.5783       | FALSE     |
| Transmembrane emp24 domain containing 1 OS=Mus musculus GN=Tmed1 PE=2 SV=1                   | B2RRM5 (+1)      | Tmed1        | 25 kDa  | 0            | 0           | 0            | 0.81665     | 0.85944      | FALSE     |
| Transmembrane emp24 domain-containing protein 10 OS=Mus musculus GN=Tmed10 PE=1 SV=1         | Q9D1D4           | Tmed10       | 25 kDa  | 0            | 0           | 0            | 3.2666      | 2.5783       | FALSE     |
| Transmembrane emp24 domain-containing protein 4 OS=Mus musculus GN=Tmed4 PE=1 SV=1           | Q8R1V4           | Tmed4        | 26 kDa  | 0            | 0           | 0            | 1.6333      | 2.1486       | FALSE     |
| Transmembrane emp24 protein transport domain containing 5 OS=Mus musculus GN=Tmed5 PE=1 SV=1 | A2RS96 (+1)      | Tmed5        | 26 kDa  | 0            | 0           | 0            | 0           | 0.85944      | FALSE     |
| Transmembrane p24-trafficking protein 7 OS=Mus musculus GN=Tmed7 PE=1 SV=1                   | D3YZZ5 (+1)      | Tmed7        | 25 kDa  | 0            | 0           | 0            | 1.6333      | 2.5783       | FALSE     |
| Transmembrane protein 11, mitochondrial OS=Mus musculus GN=Tmem11 PE=1 SV=1                  | E9Q933 (+1)      | Tmem11       | 20 kDa  | 0            | 0           | 0            | 0.81665     | 1.2892       | FALSE     |
| Transmembrane protein 120A OS=Mus musculus GN=Tmem120a PE=1 SV=1                             | Q8C1E7           | Tmem120a     | 41 kDa  | 0            | 0           | 0            | 0.81665     | 0            | FALSE     |
| Transmembrane protein 165 OS=Mus musculus GN=Tmem165 PE=1 SV=2                               | P52875           | Tmem165      | 35 kDa  | 0            | 0           | 0            | 0.81665     | 0.85944      | FALSE     |
| Transmembrane protein 176B OS=Mus musculus GN=Tmem176b PE=1 SV=1                             | Q9R1Q6           | Tmem176b     | 28 kDa  | 0            | 0           | 0            | 0.81665     | 1.2892       | FALSE     |
| Transmembrane protein 214 OS=Mus musculus GN=Tmem214 PE=1 SV=1                               | Q8BM55           | Tmem214      | 76 kDa  | 0            | 0           | 0            | 1.225       | 0            | FALSE     |
| Transmembrane protein 43 OS=Mus musculus GN=Tmem43 PE=1 SV=1                                 | Q9DBS1           | Tmem43       | 45 kDa  | 0            | 0           | 0            | 1.225       | 1.7189       | FALSE     |
| Transmembrane protein 87A OS=Mus musculus GN=Tmem87a PE=1 SV=1                               | A2AQJ5 (+2)      | Tmem87a      | 64 kDa  | 0            | 0           | 0            | 0           | 0.85944      | FALSE     |

| Identified Proteins (2666)                                                                 | Accession Number | Alternate ID | MW      | VPSko-biotin | ctrl-biotin | VPSoe-biotin | ctrl lysate | VPSoe lysate | enriched? |
|--------------------------------------------------------------------------------------------|------------------|--------------|---------|--------------|-------------|--------------|-------------|--------------|-----------|
| Transport and Golgi organization protein 1 homolog OS=Mus musculus GN=Mia3 PE=1 SV=2       | Q8BI84           | Mia3         | 214 kDa | 0            | 0           | 0            | 1.225       | 0            | FALSE     |
| Transportin 3 OS=Mus musculus GN=Tnpo3 PE=2 SV=1                                           | Q6DI95 (+1)      | Tnpo3        | 104 kDa | 0            | 0           | 0            | 3.2666      | 3.008        | FALSE     |
| Transportin-1 OS=Mus musculus GN=Tnpo1 PE=1 SV=2                                           | Q8BFY9           | Tnpo1        | 102 kDa | 0            | 0           | 0            | 3.6749      | 3.8675       | FALSE     |
| Trifunctional purine biosynthetic protein adenosine-3 OS=Mus musculus GN=Gart PE=1 SV=3    | Q64737           | Gart         | 108 kDa | 0            | 0           | 0            | 9.3915      | 8.1647       | FALSE     |
| Trim47 protein (Fragment) OS=Mus musculus GN=Trim47 PE=2 SV=1                              | Q497Z1 (+1)      | Trim47       | 70 kDa  | 0            | 0           | 0            | 1.6333      | 1.2892       | FALSE     |
| Trimethyllysine dioxygenase, mitochondrial OS=Mus musculus GN=Tmlhe PE=1 SV=2              | Q91ZE0           | Tmlhe        | 50 kDa  | 0            | 0           | 0            | 0           | 0.85944      | FALSE     |
| TRIO and F-actin-binding protein OS=Mus musculus GN=Triobb PE=1 SV=3                       | Q99KW3           | Triobb       | 223 kDa | 0            | 0           | 0            | 0.81665     | 0            | FALSE     |
| Tripartite motif protein 3, isoform CRA_a OS=Mus musculus GN=Trim3 PE=1 SV=2               | D3YUY7 (+1)      | Trim3        | 81 kDa  | 0            | 0           | 0            | 0.81665     | 0            | FALSE     |
| Tripartite motif-containing 28 OS=Mus musculus GN=Trim28 PE=2 SV=1                         | Q5EBP9 (+1)      | Trim28       | 89 kDa  | 0            | 0           | 0            | 7.3499      | 7.3052       | FALSE     |
| Tripartite motif-containing protein 16 OS=Mus musculus GN=Trim16 PE=1 SV=2                 | Q99PP9           | Trim16       | 63 kDa  | 0            | 0           | 0            | 0           | 0.85944      | FALSE     |
| Tripeptidyl-peptidase 1 OS=Mus musculus GN=Tpp1 PE=1 SV=2                                  | Q89023 (+2)      | Tpp1         | 61 kDa  | 0            | 0           | 0            | 1.6333      | 1.2892       | FALSE     |
| tRNA (guanine-N(7)-methyltransferase non-catalytic subunit WDR4 OS=Mus musculus GN=Wdr4    | Q9EP82           | Wdr4         | 46 kDa  | 0            | 0           | 0            | 0.81665     | 1.7189       | FALSE     |
| tRNA (guanine(26)-N(2))-dimethyltransferase OS=Mus musculus GN=Trmt1 PE=2 SV=1             | Q8R2M8           | Trmt1        | 68 kDa  | 0            | 0           | 0            | 1.6333      | 1.2892       | FALSE     |
| tRNA (uracil-5-)-methyltransferase homolog A OS=Mus musculus GN=Trmt2a PE=1 SV=1           | E9PUQ7 (+3)      | Trmt2a       | 68 kDa  | 0            | 0           | 0            | 0           | 0.85944      | FALSE     |
| tRNA pseudouridine synthase OS=Mus musculus GN=Plus1 PE=2 SV=1                             | Q3TT85 (+1)      | Pus1         | 44 kDa  | 0            | 0           | 0            | 2.0416      | 3.008        | FALSE     |
| Tropomodulin-3 OS=Mus musculus GN=Tmod3 PE=1 SV=1                                          | Q9JHJ0           | Tmod3        | 40 kDa  | 0            | 0           | 0            | 1.225       | 0            | FALSE     |
| TSC22 domain family, member 2 OS=Mus musculus GN=Tsc22d2 PE=1 SV=1                         | E9Q7M2           | Tsc22d2      | 78 kDa  | 0            | 0           | 0            | 0           | 1.2892       | FALSE     |
| Tubby-related protein 3 OS=Mus musculus GN=Tulp3 PE=1 SV=1                                 | Q88413           | Tulp3        | 51 kDa  | 0            | 0           | 0            | 0           | 1.2892       | FALSE     |
| Tubulin alpha-1A chain OS=Mus musculus GN=Tuba1a PE=1 SV=1                                 | P68369           | Tuba1a       | 50 kDa  | 0            | 0           | 0            | 40.016      | 39.104       | FALSE     |
| Tubulin beta-3 chain OS=Mus musculus GN=Tubb3 PE=1 SV=1                                    | Q9ERD7           | Tubb3        | 50 kDa  | 0            | 0           | 0            | 24.908      | 27.072       | FALSE     |
| Tubulin gamma-1 chain OS=Mus musculus GN=Tubg1 PE=1 SV=1                                   | P83887 (+1)      | Tubg1        | 51 kDa  | 0            | 0           | 0            | 2.0416      | 2.1486       | FALSE     |
| Tubulin-tyrosine ligase-like protein 12 OS=Mus musculus GN=Ttll12 PE=1 SV=1                | Q3UDE2           | Ttll12       | 74 kDa  | 0            | 0           | 0            | 6.1249      | 7.3052       | FALSE     |
| Tubulin-folding cofactor B OS=Mus musculus GN=Tbcb PE=1 SV=2                               | Q9D1E6           | Tbcb         | 27 kDa  | 0            | 0           | 0            | 1.225       | 0.85944      | FALSE     |
| Tubulin-specific chaperone D OS=Mus musculus GN=Tbcd PE=1 SV=1                             | Q8BYA0           | Tbcd         | 133 kDa | 0            | 0           | 0            | 3.2666      | 1.2892       | FALSE     |
| Tumor protein D52 (Fragment) OS=Mus musculus GN=Tpd52 PE=1 SV=1                            | D3Z7X7           | Tpd52        | 23 kDa  | 0            | 0           | 0            | 0           | 1.7189       | FALSE     |
| Twinfilin-1 OS=Mus musculus GN=Twf1 PE=1 SV=2                                              | Q91YR1           | Twf1         | 40 kDa  | 0            | 0           | 0            | 2.45        | 2.5783       | FALSE     |
| Twinfilin-2 OS=Mus musculus GN=Twf2 PE=1 SV=1                                              | Q9Z0P5           | Twf2         | 39 kDa  | 0            | 0           | 0            | 0           | 1.2892       | FALSE     |
| Twisted gastrulation protein homolog 1 OS=Mus musculus GN=Twsg1 PE=1 SV=1                  | Q9EP52           | Twsg1        | 25 kDa  | 0            | 0           | 0            | 0           | 0.85944      | FALSE     |
| Type 2 phosphatidylinositol 4,5-bisphosphate 4-phosphatase OS=Mus musculus GN=Pip4p2 PE=1  | Q9CZX7           | Pip4p2       | 28 kDa  | 0            | 0           | 0            | 0           | 0.85944      | FALSE     |
| Tyrosine-tRNA ligase OS=Mus musculus GN=Yars PE=1 SV=1                                     | A2A7S7           | Yars         | 63 kDa  | 0            | 0           | 0            | 4.8999      | 7.3052       | FALSE     |
| Tyrosine-protein kinase CSK OS=Mus musculus GN=Csk PE=1 SV=2                               | P41241 (+1)      | Csk          | 51 kDa  | 0            | 0           | 0            | 0           | 0.85944      | FALSE     |
| Tyrosine-protein kinase Fer OS=Mus musculus GN=Fer PE=1 SV=2                               | P70451           | Fer          | 95 kDa  | 0            | 0           | 0            | 0.81665     | 0.85944      | FALSE     |
| Tyrosine-protein kinase OS=Mus musculus GN=Jak1 PE=2 SV=1                                  | Q3URU8           | Jak1         | 133 kDa | 0            | 0           | 0            | 1.225       | 1.2892       | FALSE     |
| Tyrosine-protein kinase OS=Mus musculus GN=Src PE=1 SV=1                                   | F8WI90 (+1)      | Src          | 60 kDa  | 0            | 0           | 0            | 0.81665     | 1.7189       | FALSE     |
| Tyrosine-protein kinase OS=Mus musculus GN=Syk PE=1 SV=1                                   | E9PWE9 (+3)      | Syk          | 66 kDa  | 0            | 0           | 0            | 0           | 1.2892       | FALSE     |
| Tyrosine-protein phosphatase non-receptor type 1 OS=Mus musculus GN=Ptpn1 PE=1 SV=2        | P35821 (+2)      | Ptpn1        | 50 kDa  | 0            | 0           | 0            | 2.45        | 2.5783       | FALSE     |
| Tyrosine-protein phosphatase non-receptor type 11 OS=Mus musculus GN=Ptpn11 PE=1 SV=2      | P35235           | Ptpn11       | 68 kDa  | 0            | 0           | 0            | 5.3082      | 4.2972       | FALSE     |
| Tyrosine-protein phosphatase non-receptor type 12 OS=Mus musculus GN=Ptpn12 PE=1 SV=3      | P35831           | Ptpn12       | 87 kDa  | 0            | 0           | 0            | 0           | 0.85944      | FALSE     |
| Tyrosine-protein phosphatase non-receptor type 2 OS=Mus musculus GN=Ptpn2 PE=1 SV=2        | Q06180           | Ptpn2        | 47 kDa  | 0            | 0           | 0            | 0.81665     | 0.85944      | FALSE     |
| Tyrosyl-DNA phosphodiesterase 2 OS=Mus musculus GN=Tdp2 PE=1 SV=1                          | Q9JJX7           | Tdp2         | 41 kDa  | 0            | 0           | 0            | 0.81665     | 1.2892       | FALSE     |
| U2 small nuclear ribonucleoprotein A' OS=Mus musculus GN=Snrpa1 PE=1 SV=2                  | P57784           | Snrpa1       | 28 kDa  | 0            | 0           | 0            | 0           | 0.85944      | FALSE     |
| U2 small nuclear ribonucleoprotein B'' OS=Mus musculus GN=Snrpb2 PE=1 SV=1                 | Q9CQI7           | Snrpb2       | 25 kDa  | 0            | 0           | 0            | 0           | 0.85944      | FALSE     |
| U2 snRNP auxiliary factor large subunit OS=Mus musculus GN=U2af2 PE=1 SV=1                 | Q3KQM4 (+3)      | U2af2        | 34 kDa  | 0            | 0           | 0            | 0.81665     | 2.1486       | FALSE     |
| U5 small nuclear ribonucleoprotein 200 kDa helicase OS=Mus musculus GN=Snrnp200 PE=1 SV=1  | Q6P4T2           | Snrnp200     | 245 kDa | 0            | 0           | 0            | 0           | 0.85944      | FALSE     |
| U6 small nuclear RNA (adenine-(43)-N(6))-methyltransferase OS=Mus musculus GN=Mettl16 PE=1 | Q5SW15 (+1)      | Mettl16      | 67 kDa  | 0            | 0           | 0            | 0           | 0.85944      | FALSE     |
| Ubiquilin-2 OS=Mus musculus GN=Ubqln2 PE=1 SV=2                                            | Q9QZM0           | Ubqln2       | 67 kDa  | 0            | 0           | 0            | 6.9416      | 8.1647       | FALSE     |
| Ubiquitin carboxyl-terminal hydrolase (Fragment) OS=Mus musculus GN=Uchl1 PE=2 SV=1        | Q3TCH2 (+1)      | Uchl1        | 25 kDa  | 0            | 0           | 0            | 0.81665     | 0            | FALSE     |
| Ubiquitin carboxyl-terminal hydrolase 10 OS=Mus musculus GN=Usp10 PE=1 SV=3                | P52479           | Usp10        | 87 kDa  | 0            | 0           | 0            | 0           | 1.2892       | FALSE     |
| Ubiquitin carboxyl-terminal hydrolase 14 OS=Mus musculus GN=Usp14 PE=1 SV=3                | Q9JMA1           | Usp14        | 56 kDa  | 0            | 0           | 0            | 7.7582      | 6.0161       | FALSE     |
| Ubiquitin carboxyl-terminal hydrolase 15 OS=Mus musculus GN=Usp15 PE=1 SV=1                | Q8R5H1           | Usp15        | 112 kDa | 0            | 0           | 0            | 1.225       | 1.7189       | FALSE     |
| Ubiquitin carboxyl-terminal hydrolase 19 OS=Mus musculus GN=Usp19 PE=1 SV=1                | A0A0A6YWX1 (+3)  | Usp19        | 146 kDa | 0            | 0           | 0            | 0           | 1.2892       | FALSE     |

| Identified Proteins (2666)                                                                    | Accession Number | Alternate ID | MW      | VPSko-biotin | ctrl-biotin | VPSoe-biotin | ctrl lysate | VPSoe lysate | enriched? |
|-----------------------------------------------------------------------------------------------|------------------|--------------|---------|--------------|-------------|--------------|-------------|--------------|-----------|
| Ubiquitin carboxyl-terminal hydrolase 24 OS=Mus musculus GN=Usp24 PE=1 SV=1                   | B1AY13 (+1)      | Usp24        | 294 kDa | 0            | 0           | 0            | 0           | 1.2892       | FALSE     |
| Ubiquitin carboxyl-terminal hydrolase 47 OS=Mus musculus GN=Usp47 PE=1 SV=2                   | Q8BY87           | Usp47        | 157 kDa | 0            | 0           | 0            | 6.5332      | 8.1647       | FALSE     |
| Ubiquitin carboxyl-terminal hydrolase 5 OS=Mus musculus GN=Usp5 PE=1 SV=1                     | P56399 (+1)      | Usp5         | 96 kDa  | 3.6831       | 3.1957      | 5.3684       | 6.9416      | 8.1647       | FALSE     |
| Ubiquitin carboxyl-terminal hydrolase 7 OS=Mus musculus GN=Usp7 PE=1 SV=1                     | F8VPX1 (+1)      | Usp7         | 128 kDa | 0            | 0           | 0            | 0.81665     | 2.1486       | FALSE     |
| Ubiquitin carboxyl-terminal hydrolase 8 OS=Mus musculus GN=Usp8 PE=1 SV=2                     | Q80U87           | Usp8         | 123 kDa | 0            | 0           | 0            | 0.81665     | 0.85944      | FALSE     |
| Ubiquitin carboxyl-terminal hydrolase isozyme L3 OS=Mus musculus GN=Uchl3 PE=1 SV=2           | Q9JKB1           | Uchl3        | 26 kDa  | 0            | 0           | 0            | 1.6333      | 3.4377       | FALSE     |
| Ubiquitin carboxyl-terminal hydrolase isozyme L5 OS=Mus musculus GN=Uchl5 PE=1 SV=2           | Q9WUP7           | Uchl5        | 38 kDa  | 0            | 0           | 0            | 2.8583      | 2.1486       | FALSE     |
| Ubiquitin conjugation factor E4 B OS=Mus musculus GN=Ube4b PE=1 SV=3                          | Q9ES00           | Ube4b        | 133 kDa | 0            | 0           | 0            | 2.45        | 3.008        | FALSE     |
| Ubiquitin recognition factor in ER-associated degradation protein 1 OS=Mus musculus GN=Ufd1 P | P70362 (+1)      | Ufd1         | 34 kDa  | 0            | 0           | 0            | 1.225       | 2.5783       | FALSE     |
| Ubiquitin thioesterase OTUB1 OS=Mus musculus GN=Otub1 PE=1 SV=1                               | D3YWF6 (+1)      | Otub1        | 28 kDa  | 0            | 0           | 0            | 2.45        | 3.008        | FALSE     |
| Ubiquitin-activating enzyme E1, Chr X OS=Mus musculus GN=Uba1 PE=1 SV=1                       | B9EHN0 (+1)      | Uba1         | 118 kDa | 14.732       | 19.174      | 19.684       | 21.641      | 21.056       | FALSE     |
| Ubiquitin-conjugating enzyme E2 E2 OS=Mus musculus GN=Ube2e2 PE=2 SV=1                        | Q91W82           | Ube2e2       | 22 kDa  | 0            | 0           | 0            | 1.225       | 1.2892       | FALSE     |
| Ubiquitin-conjugating enzyme E2 H OS=Mus musculus GN=Ube2h PE=1 SV=1                          | P62257 (+1)      | Ube2h        | 21 kDa  | 0            | 0           | 0            | 1.225       | 0            | FALSE     |
| Ubiquitin-conjugating enzyme E2 J1 OS=Mus musculus GN=Ube2j1 PE=1 SV=2                        | Q9JJZ4           | Ube2j1       | 35 kDa  | 0            | 0           | 0            | 1.225       | 0            | FALSE     |
| Ubiquitin-conjugating enzyme E2 K OS=Mus musculus GN=Ube2k PE=1 SV=3                          | P61087 (+1)      | Ube2k        | 22 kDa  | 0            | 0           | 0            | 2.0416      | 2.1486       | FALSE     |
| Ubiquitin-conjugating enzyme E2 L3 OS=Mus musculus GN=Ube2l3 PE=1 SV=1                        | P68037 (+1)      | Ube2l3       | 18 kDa  | 0            | 0           | 0            | 1.225       | 2.1486       | FALSE     |
| Ubiquitin-conjugating enzyme E2 Z OS=Mus musculus GN=Ube2z PE=1 SV=2                          | Q3UE37           | Ube2z        | 38 kDa  | 0            | 0           | 0            | 2.8583      | 4.2972       | FALSE     |
| Ubiquitin-like domain-containing CTD phosphatase 1 OS=Mus musculus GN=Ublcp1 PE=1 SV=1        | Q8BGR9           | Ublcp1       | 37 kDa  | 0            | 0           | 0            | 1.225       | 0.85944      | FALSE     |
| Ubiquitin-like modifier-activating enzyme 5 OS=Mus musculus GN=Uba5 PE=1 SV=2                 | Q8VE47           | Uba5         | 45 kDa  | 0            | 0           | 0            | 0.81665     | 1.2892       | FALSE     |
| Ubiquitin-protein ligase E3A OS=Mus musculus GN=Ube3a PE=1 SV=2                               | O08759 (+1)      | Ube3a        | 100 kDa | 0            | 0           | 0            | 0.81665     | 0            | FALSE     |
| UBX domain containing 2, isoform CRA_a OS=Mus musculus GN=Ubxn4 PE=1 SV=1                     | A0A0R4J078       | Ubxn4        | 56 kDa  | 0            | 0           | 0            | 1.225       | 1.2892       | FALSE     |
| UBX domain-containing protein 1 OS=Mus musculus GN=Ubxn1 PE=1 SV=1                            | Q922Y1           | Ubxn1        | 34 kDa  | 0            | 0           | 0            | 1.225       | 0            | FALSE     |
| UDP-glucose:glycoprotein glucosyltransferase 1 OS=Mus musculus GN=Uggt1 PE=1 SV=4             | Q6P5E4           | Uggt1        | 176 kDa | 0            | 4.7936      | 5.3684       | 11.433      | 8.1647       | FALSE     |
| UDP-glucuronosyltransferase 1-7C OS=Mus musculus GN=Ugt1a7c PE=1 SV=1                         | Q6ZQM8           | Ugt1a7c      | 60 kDa  | 0            | 0           | 0            | 3.2666      | 1.7189       | FALSE     |
| UDP-N-acetylglucosamine-peptide N-acetylglucosaminyltransferase 110 kDa subunit OS=Mus m      | Q8CGY8           | Ogt          | 117 kDa | 0            | 0           | 0            | 0.81665     | 0.85944      | FALSE     |
| UDP-N-acetylhexosamine pyrophosphorylase OS=Mus musculus GN=Uap1 PE=1 SV=1                    | A0A0R4J085 (+3)  | Uap1         | 58 kDa  | 0            | 0           | 0            | 2.0416      | 1.7189       | FALSE     |
| UDP-N-acetylhexosamine pyrophosphorylase-like protein 1 OS=Mus musculus GN=Uap1l1 PE=1 S      | Q3TW96 (+1)      | Uap1l1       | 57 kDa  | 0            | 0           | 0            | 1.6333      | 2.1486       | FALSE     |
| Ufm1-specific protease 2 OS=Mus musculus GN=Ufsp2 PE=1 SV=1                                   | Q99K23           | Ufsp2        | 53 kDa  | 0            | 0           | 0            | 1.6333      | 1.2892       | FALSE     |
| UMP-CMP kinase 2, mitochondrial OS=Mus musculus GN=Cmpk2 PE=1 SV=2                            | Q3U5Q7           | Cmpk2        | 50 kDa  | 0            | 0           | 0            | 0.81665     | 0            | FALSE     |
| UMP-CMP kinase OS=Mus musculus GN=Cmpk1 PE=1 SV=1                                             | A0A0R4J093 (+1)  | Cmpk1        | 26 kDa  | 0            | 0           | 0            | 1.6333      | 2.1486       | FALSE     |
| Uncharacterized protein (Fragment) OS=Mus musculus GN=Alg5 PE=2 SV=3                          | Q9CTE8 (+1)      | Alg5         | 40 kDa  | 0            | 0           | 0            | 0           | 1.2892       | FALSE     |
| Uncharacterized protein (Fragment) OS=Mus musculus GN=Ap1g1 PE=2 SV=1                         | Q8CC03           | Ap1g1        | 77 kDa  | 0            | 0           | 0            | 2.0416      | 0.85944      | FALSE     |
| Uncharacterized protein (Fragment) OS=Mus musculus GN=Dnm1l PE=2 SV=1                         | Q3U4P3           | Dnm1l        | 79 kDa  | 0            | 0           | 0            | 4.4916      | 3.8675       | FALSE     |
| Uncharacterized protein (Fragment) OS=Mus musculus GN=Gmppa PE=2 SV=1                         | Q3UNCO (+1)      | Gmppa        | 47 kDa  | 0            | 0           | 0            | 2.8583      | 1.2892       | FALSE     |
| Uncharacterized protein (Fragment) OS=Mus musculus GN=Golga3 PE=2 SV=1                        | Q3UZV1           | Golga3       | 106 kDa | 0            | 0           | 0            | 0.81665     | 0            | FALSE     |
| Uncharacterized protein (Fragment) OS=Mus musculus GN=Gsr PE=2 SV=1                           | Q3U9R7 (+1)      | Gsr          | 49 kDa  | 0            | 0           | 0            | 2.8583      | 3.008        | FALSE     |
| Uncharacterized protein (Fragment) OS=Mus musculus GN=Kpna4 PE=2 SV=1                         | Q3UGH8           | Kpna4        | 68 kDa  | 0            | 0           | 0            | 0.81665     | 0            | FALSE     |
| Uncharacterized protein (Fragment) OS=Mus musculus GN=Nqo2 PE=2 SV=1                          | Q9CVF5 (+2)      | Nqo2         | 31 kDa  | 0            | 0           | 0            | 1.6333      | 1.2892       | FALSE     |
| Uncharacterized protein (Fragment) OS=Mus musculus GN=Pak1ip1 PE=2 SV=1                       | Q3UX26 (+1)      | Pak1ip1      | 41 kDa  | 0            | 0           | 0            | 0           | 1.2892       | FALSE     |
| Uncharacterized protein (Fragment) OS=Mus musculus GN=Pmpca PE=2 SV=1                         | Q3TY06           | Pmpca        | 58 kDa  | 0            | 0           | 0            | 1.225       | 1.2892       | FALSE     |
| Uncharacterized protein (Fragment) OS=Mus musculus GN=Pmpcb PE=2 SV=1                         | Q3TET5 (+1)      | Pmpcb        | 54 kDa  | 0            | 0           | 0            | 1.6333      | 0            | FALSE     |
| Uncharacterized protein (Fragment) OS=Mus musculus GN=Ppat PE=2 SV=1                          | Q3TKC5 (+3)      | Ppat         | 53 kDa  | 0            | 0           | 0            | 1.225       | 2.1486       | FALSE     |
| Uncharacterized protein (Fragment) OS=Mus musculus GN=Prdx5 PE=2 SV=1                         | Q3UWS9           | Prdx5        | 21 kDa  | 0            | 0           | 0            | 1.6333      | 1.2892       | FALSE     |
| Uncharacterized protein (Fragment) OS=Mus musculus GN=Prepl PE=2 SV=1                         | Q8BKS6 (+1)      | Prepl        | 76 kDa  | 0            | 0           | 0            | 0.81665     | 0            | FALSE     |
| Uncharacterized protein (Fragment) OS=Mus musculus GN=Prmt3 PE=2 SV=1                         | Q3U2K1 (+1)      | Prmt3        | 59 kDa  | 0            | 0           | 0            | 0.81665     | 1.2892       | FALSE     |
| Uncharacterized protein (Fragment) OS=Mus musculus GN=Rdx PE=2 SV=1                           | Q3TH46 (+1)      | Rdx          | 77 kDa  | 0            | 0           | 0            | 8.1665      | 7.3052       | FALSE     |
| Uncharacterized protein (Fragment) OS=Mus musculus GN=Rexo2 PE=2 SV=1                         | Q3TAV0 (+3)      | Rexo2        | 25 kDa  | 0            | 0           | 0            | 1.225       | 0.85944      | FALSE     |
| Uncharacterized protein (Fragment) OS=Mus musculus GN=Sumf2 PE=2 SV=1                         | Q3TM08 (+1)      | Sumf2        | 34 kDa  | 0            | 0           | 0            | 1.6333      | 1.7189       | FALSE     |
| Uncharacterized protein (Fragment) OS=Mus musculus GN=Wdr1 PE=2 SV=1                          | Q3U136           | Wdr1         | 70 kDa  | 0            | 0           | 0            | 15.516      | 12.892       | FALSE     |
| Uncharacterized protein (Fragment) OS=Mus musculus PE=2 SV=1                                  | Q3TV85           |              | 48 kDa  | 0            | 0           | 0            | 2.45        | 3.008        | FALSE     |
| Uncharacterized protein C17orf62 homolog OS=Mus musculus PE=1 SV=2                            | Q3TYS2           |              | 21 kDa  | 0            | 0           | 0            | 1.225       | 1.2892       | FALSE     |



| Identified Proteins (2666)                                         | Accession Number | Alternate ID | MW      | VPSko-biotin | ctrl-biotin | VPSoe-biotin | ctrl lysate | VPSoe lysate | enriched? |
|--------------------------------------------------------------------|------------------|--------------|---------|--------------|-------------|--------------|-------------|--------------|-----------|
| Uncharacterized protein C1orf198 homolog OS=Mus musculus PE=1 SV=1 | Q8C3W1           |              | 35 kDa  | 0            | 0           | 0            | 0.81665     | 0.85944      | FALSE     |
| Uncharacterized protein C7orf50 homolog OS=Mus musculus PE=1 SV=3  | Q9CXL3           |              | 22 kDa  | 0            | 0           | 0            | 0           | 0.85944      | FALSE     |
| Uncharacterized protein FUJ45252 homolog OS=Mus musculus PE=1 SV=2 | Q6PIU9           |              | 38 kDa  | 0            | 0           | 0            | 1.225       | 1.7189       | FALSE     |
| Uncharacterized protein OS=Mus musculus GN=Aars PE=2 SV=1          | Q3UD67 (+1)      | Aars         | 107 kDa | 0            | 0           | 0            | 11.433      | 9.8835       | FALSE     |
| Uncharacterized protein OS=Mus musculus GN=Abcd3 PE=2 SV=1         | Q3U645           | Abcd3        | 75 kDa  | 0            | 0           | 0            | 1.225       | 1.2892       | FALSE     |
| Uncharacterized protein OS=Mus musculus GN=Acp2 PE=2 SV=1          | Q3UZN1           | Acp2         | 47 kDa  | 0            | 0           | 0            | 0.81665     | 0            | FALSE     |
| Uncharacterized protein OS=Mus musculus GN=Acsl4 PE=2 SV=1         | Q8BW44 (+2)      | Acsl4        | 74 kDa  | 0            | 0           | 0            | 1.225       | 0            | FALSE     |
| Uncharacterized protein OS=Mus musculus GN=Actb PE=2 SV=1          | Q3UBP6           | Actb         | 42 kDa  | 0            | 0           | 0            | 61.657      | 60.161       | FALSE     |
| Uncharacterized protein OS=Mus musculus GN=Aldh9a1 PE=2 SV=1       | Q3THE7           | Aldh9a1      | 54 kDa  | 0            | 0           | 0            | 3.6749      | 4.2972       | FALSE     |
| Uncharacterized protein OS=Mus musculus GN=Anapc4 PE=2 SV=1        | Q3TI31 (+2)      | Anapc4       | 92 kDa  | 0            | 0           | 0            | 1.6333      | 2.5783       | FALSE     |
| Uncharacterized protein OS=Mus musculus GN=Arhgef10 PE=2 SV=1      | Q3UGZ6 (+1)      | Arhgef10     | 148 kDa | 0            | 0           | 0            | 0           | 0.85944      | FALSE     |
| Uncharacterized protein OS=Mus musculus GN=Arl3 PE=1 SV=1          | Q543P7 (+1)      | Arl3         | 20 kDa  | 0            | 0           | 0            | 1.6333      | 1.7189       | FALSE     |
| Uncharacterized protein OS=Mus musculus GN=Atl2 PE=2 SV=1          | Q8BYP9           | Atl2         | 47 kDa  | 0            | 0           | 0            | 0.81665     | 1.2892       | FALSE     |
| Uncharacterized protein OS=Mus musculus GN=Atp6v1b2 PE=2 SV=1      | A0A1S6GWWG6 (+1) | Atp6v1b2     | 59 kDa  | 0            | 0           | 0            | 2.8583      | 3.8675       | FALSE     |
| Uncharacterized protein OS=Mus musculus GN=Baiap2 PE=2 SV=1        | Q3UKP6 (+1)      | Baiap2       | 58 kDa  | 0            | 0           | 0            | 0           | 0.85944      | FALSE     |
| Uncharacterized protein OS=Mus musculus GN=Bcap31 PE=2 SV=1        | Q3U9U5 (+1)      | Bcap31       | 28 kDa  | 0            | 0           | 0            | 2.0416      | 1.2892       | FALSE     |
| Uncharacterized protein OS=Mus musculus GN=Bcl2l13 PE=2 SV=1       | Q3TNR7 (+1)      | Bcl2l13      | 47 kDa  | 0            | 0           | 0            | 0.81665     | 0            | FALSE     |
| Uncharacterized protein OS=Mus musculus GN=Birc6 PE=2 SV=1         | A0A1S6GWH3 (+3)  | Birc6        | 532 kDa | 0            | 0           | 0            | 6.1249      | 6.8755       | FALSE     |
| Uncharacterized protein OS=Mus musculus GN=Cars PE=2 SV=1          | Q3UXN3 (+1)      | Cars         | 95 kDa  | 0            | 0           | 0            | 4.8999      | 3.8675       | FALSE     |
| Uncharacterized protein OS=Mus musculus GN=Cdk14 PE=2 SV=1         | Q8BN81 (+1)      | Cdk14        | 38 kDa  | 0            | 0           | 0            | 0.81665     | 1.2892       | FALSE     |
| Uncharacterized protein OS=Mus musculus GN=Cdk4 PE=2 SV=1          | Q8BP21           | Cdk4         | 34 kDa  | 0            | 0           | 0            | 2.8583      | 3.008        | FALSE     |
| Uncharacterized protein OS=Mus musculus GN=Cnot2 PE=2 SV=1         | A0A1S6GWJ6 (+3)  | Cnot2        | 61 kDa  | 0            | 0           | 0            | 1.225       | 0            | FALSE     |
| Uncharacterized protein OS=Mus musculus GN=Cyp7b1 PE=2 SV=1        | Q3USU4 (+2)      | Cyp7b1       | 58 kDa  | 0            | 0           | 0            | 2.0416      | 1.2892       | FALSE     |
| Uncharacterized protein OS=Mus musculus GN=Dctn4 PE=2 SV=1         | Q3TQY2           | Dctn4        | 52 kDa  | 0            | 0           | 0            | 2.8583      | 2.5783       | FALSE     |
| Uncharacterized protein OS=Mus musculus GN=Dhrs4 PE=2 SV=1         | Q3UIB5 (+1)      | Dhrs4        | 28 kDa  | 0            | 0           | 0            | 1.225       | 1.2892       | FALSE     |
| Uncharacterized protein OS=Mus musculus GN=Dkc1 PE=2 SV=1          | Q3TM67 (+1)      | Dkc1         | 57 kDa  | 0            | 0           | 0            | 0           | 0.85944      | FALSE     |
| Uncharacterized protein OS=Mus musculus GN=Dok1 PE=2 SV=1          | Q3UWF9           | Dok1         | 53 kDa  | 0            | 0           | 0            | 1.225       | 0.85944      | FALSE     |
| Uncharacterized protein OS=Mus musculus GN=Edc3 PE=1 SV=1          | A0ELI5 (+1)      | Edc3         | 56 kDa  | 0            | 0           | 0            | 0.81665     | 0            | FALSE     |
| Uncharacterized protein OS=Mus musculus GN=Eef2 PE=2 SV=1          | Q3UZ14           | Eef2         | 95 kDa  | 22.099       | 30.359      | 25.053       | 31.033      | 35.237       | FALSE     |
| Uncharacterized protein OS=Mus musculus GN=Eif4b PE=2 SV=1         | Q3TDD8 (+2)      | Eif4b        | 69 kDa  | 0            | 3.1957      | 3.5789       | 4.4916      | 7.3052       | FALSE     |
| Uncharacterized protein OS=Mus musculus GN=Eif4h PE=2 SV=1         | Q3V244 (+2)      | Eif4h        | 27 kDa  | 0            | 0           | 0            | 3.6749      | 3.8675       | FALSE     |
| Uncharacterized protein OS=Mus musculus GN=Erp44 PE=2 SV=1         | Q3URM4 (+1)      | Erp44        | 47 kDa  | 0            | 0           | 0            | 2.8583      | 3.008        | FALSE     |
| Uncharacterized protein OS=Mus musculus GN=Etf1 PE=2 SV=1          | Q3TDF8 (+3)      | Etf1         | 49 kDa  | 0            | 0           | 0            | 5.7166      | 3.8675       | FALSE     |
| Uncharacterized protein OS=Mus musculus GN=Exosc4 PE=1 SV=1        | Q542B0 (+1)      | Exosc4       | 26 kDa  | 0            | 0           | 0            | 0.81665     | 0            | FALSE     |
| Uncharacterized protein OS=Mus musculus GN=Fbxo2 PE=1 SV=1         | Q3USR5 (+1)      | Fbxo2        | 34 kDa  | 0            | 0           | 0            | 0           | 0.85944      | FALSE     |
| Uncharacterized protein OS=Mus musculus GN=Fubp3 PE=2 SV=1         | Q3ULP9           | Fubp3        | 62 kDa  | 0            | 0           | 0            | 3.2666      | 3.008        | FALSE     |
| Uncharacterized protein OS=Mus musculus GN=Galk2 PE=1 SV=1         | Q3U3H5 (+2)      | Galk2        | 51 kDa  | 0            | 0           | 0            | 0.81665     | 1.7189       | FALSE     |
| Uncharacterized protein OS=Mus musculus GN=Gclc PE=2 SV=1          | Q3UNA7           | Gclc         | 73 kDa  | 0            | 0           | 0            | 0           | 2.5783       | FALSE     |
| Uncharacterized protein OS=Mus musculus GN=Gnl3 PE=2 SV=1          | Q3TK27 (+1)      | Gnl3         | 61 kDa  | 0            | 0           | 0            | 0           | 1.2892       | FALSE     |
| Uncharacterized protein OS=Mus musculus GN=Gpnmb PE=2 SV=1         | Q3TAV1 (+4)      | Gpnmb        | 64 kDa  | 0            | 0           | 0            | 0.81665     | 0            | FALSE     |
| Uncharacterized protein OS=Mus musculus GN=Gtf2b PE=2 SV=1         | Q3UNY0           | Gtf2b        | 35 kDa  | 0            | 0           | 0            | 0           | 2.1486       | FALSE     |
| Uncharacterized protein OS=Mus musculus GN=Heatr3 PE=2 SV=1        | Q3USC0 (+1)      | Heatr3       | 74 kDa  | 0            | 0           | 0            | 1.6333      | 2.1486       | FALSE     |
| Uncharacterized protein OS=Mus musculus GN=Hmgcl PE=2 SV=1         | Q3UMP2           | Hmgcl        | 34 kDa  | 0            | 0           | 0            | 0           | 0.85944      | FALSE     |
| Uncharacterized protein OS=Mus musculus GN=Ilf2 PE=2 SV=1          | Q3UXI9 (+1)      | Ilf2         | 43 kDa  | 0            | 0           | 0            | 1.225       | 1.7189       | FALSE     |
| Uncharacterized protein OS=Mus musculus GN=Lamb1 PE=2 SV=1         | Q3UHL7           | Lamb1        | 202 kDa | 0            | 0           | 7.1579       | 8.9832      | 10.313       | FALSE     |
| Uncharacterized protein OS=Mus musculus GN=Lamp2 PE=2 SV=1         | Q9CZU7           | Lamp2        | 46 kDa  | 0            | 0           | 0            | 2.8583      | 2.5783       | FALSE     |
| Uncharacterized protein OS=Mus musculus GN=Lman1 PE=2 SV=1         | Q3U944 (+1)      | Lman1        | 61 kDa  | 0            | 0           | 0            | 5.3082      | 2.5783       | FALSE     |
| Uncharacterized protein OS=Mus musculus GN=Luc7l2 PE=2 SV=1        | Q3UZ17 (+1)      | Luc7l2       | 45 kDa  | 0            | 0           | 0            | 2.8583      | 2.1486       | FALSE     |
| Uncharacterized protein OS=Mus musculus GN=Map3k20 PE=2 SV=1       | Q3TRG2           | Map3k20      | 51 kDa  | 0            | 0           | 0            | 2.45        | 3.8675       | FALSE     |
| Uncharacterized protein OS=Mus musculus GN=Mogs PE=2 SV=1          | Q3U026 (+2)      | Mogs         | 92 kDa  | 0            | 0           | 0            | 2.45        | 2.5783       | FALSE     |
| Uncharacterized protein OS=Mus musculus GN=Mrpl19 PE=2 SV=1        | Q3URF5 (+1)      | Mrpl19       | 34 kDa  | 0            | 0           | 0            | 0           | 0.85944      | FALSE     |

| Identified Proteins (2666)                                   | Accession Number | Alternate ID | MW      | VPSko-biotin | ctrl-biotin | VPSoe-biotin | ctrl lysate | VPSoe lysate | enriched? |
|--------------------------------------------------------------|------------------|--------------|---------|--------------|-------------|--------------|-------------|--------------|-----------|
| Uncharacterized protein OS=Mus musculus GN=Mrpl39 PE=2 SV=1  | Q8CCX9 (+1)      | Mrpl39       | 35 kDa  | 0            | 0           | 0            | 0           | 0.85944      | FALSE     |
| Uncharacterized protein OS=Mus musculus GN=Naga PE=2 SV=1    | Q3U6T2 (+1)      | Naga         | 47 kDa  | 0            | 0           | 0            | 0           | 1.2892       | FALSE     |
| Uncharacterized protein OS=Mus musculus GN=Ndr3 PE=1 SV=1    | Q544I1 (+1)      | Ndr3         | 42 kDa  | 0            | 0           | 0            | 1.225       | 1.2892       | FALSE     |
| Uncharacterized protein OS=Mus musculus GN=Nelfa PE=2 SV=1   | Q3UK41 (+1)      | Nelfa        | 58 kDa  | 0            | 0           | 0            | 0.81665     | 0            | FALSE     |
| Uncharacterized protein OS=Mus musculus GN=Nfkb2 PE=1 SV=1   | Q3UG25 (+2)      | Nfkb2        | 97 kDa  | 0            | 0           | 0            | 1.6333      | 2.1486       | FALSE     |
| Uncharacterized protein OS=Mus musculus GN=Npc2 PE=2 SV=1    | Q3U3C2 (+1)      | Npc2         | 16 kDa  | 0            | 0           | 0            | 2.0416      | 1.7189       | FALSE     |
| Uncharacterized protein OS=Mus musculus GN=Npepl1 PE=2 SV=1  | Q3TCV9 (+3)      | Npepl1       | 56 kDa  | 0            | 0           | 0            | 1.6333      | 0.85944      | FALSE     |
| Uncharacterized protein OS=Mus musculus GN=Npm3 PE=2 SV=1    | Q3TAH3 (+1)      | Npm3         | 19 kDa  | 0            | 0           | 0            | 0.81665     | 0            | FALSE     |
| Uncharacterized protein OS=Mus musculus GN=Nrbp1 PE=2 SV=1   | Q3TCW5 (+1)      | Nrbp1        | 60 kDa  | 0            | 0           | 0            | 1.6333      | 1.2892       | FALSE     |
| Uncharacterized protein OS=Mus musculus GN=Nsun2 PE=2 SV=1   | A0A1S6GWH4 (+2)  | Nsun2        | 88 kDa  | 0            | 0           | 0            | 7.3499      | 10.313       | FALSE     |
| Uncharacterized protein OS=Mus musculus GN=Nup133 PE=2 SV=1  | Q8CDZ5 (+1)      | Nup133       | 129 kDa | 0            | 0           | 0            | 0.81665     | 0            | FALSE     |
| Uncharacterized protein OS=Mus musculus GN=Nup43 PE=2 SV=1   | Q3UJY4 (+1)      | Nup43        | 42 kDa  | 0            | 0           | 0            | 1.225       | 1.2892       | FALSE     |
| Uncharacterized protein OS=Mus musculus GN=Ogfr PE=2 SV=1    | Q3UF10 (+1)      | Ogfr         | 63 kDa  | 0            | 0           | 0            | 2.8583      | 1.2892       | FALSE     |
| Uncharacterized protein OS=Mus musculus GN=Parp12 PE=2 SV=1  | Q3U0S1 (+1)      | Parp12       | 80 kDa  | 0            | 0           | 0            | 1.6333      | 0            | FALSE     |
| Uncharacterized protein OS=Mus musculus GN=Pcid2 PE=2 SV=1   | Q8BNM3           | Pcid2        | 45 kDa  | 0            | 0           | 0            | 0.81665     | 0            | FALSE     |
| Uncharacterized protein OS=Mus musculus GN=Pcyox1 PE=2 SV=1  | Q3TVT6 (+2)      | Pcyox1       | 56 kDa  | 0            | 0           | 0            | 2.0416      | 2.1486       | FALSE     |
| Uncharacterized protein OS=Mus musculus GN=Pdcc6 PE=2 SV=1   | Q8C5M4           | Pdcc6        | 22 kDa  | 0            | 0           | 0            | 0           | 2.1486       | FALSE     |
| Uncharacterized protein OS=Mus musculus GN=Pdlim1 PE=2 SV=1  | Q3TZ17           | Pdlim1       | 36 kDa  | 5.5246       | 0           | 5.3684       | 7.7582      | 6.8755       | FALSE     |
| Uncharacterized protein OS=Mus musculus GN=Pigs PE=2 SV=1    | Q3U643 (+2)      | Pigs         | 62 kDa  | 0            | 0           | 0            | 0.81665     | 0            | FALSE     |
| Uncharacterized protein OS=Mus musculus GN=Pigt PE=2 SV=1    | Q3U047 (+1)      | Pigt         | 65 kDa  | 0            | 0           | 0            | 1.225       | 0.85944      | FALSE     |
| Uncharacterized protein OS=Mus musculus GN=Polr2c PE=2 SV=1  | Q3UUX3           | Polr2c       | 38 kDa  | 0            | 0           | 0            | 0.81665     | 0            | FALSE     |
| Uncharacterized protein OS=Mus musculus GN=Prep PE=2 SV=1    | Q3TCS0 (+2)      | Prep         | 81 kDa  | 0            | 0           | 0            | 11.025      | 13.321       | FALSE     |
| Uncharacterized protein OS=Mus musculus GN=Psmc4 PE=2 SV=1   | Q3TUN5           | Psmc4        | 47 kDa  | 0            | 0           | 0            | 0.81665     | 1.7189       | FALSE     |
| Uncharacterized protein OS=Mus musculus GN=Psmc5 PE=2 SV=1   | A0A1S6GWH1 (+1)  | Psmc5        | 47 kDa  | 0            | 0           | 0            | 4.8999      | 4.2972       | FALSE     |
| Uncharacterized protein OS=Mus musculus GN=Psmd2 PE=2 SV=1   | Q3TI61 (+3)      | Psmd2        | 100 kDa | 3.6831       | 6.3914      | 7.1579       | 11.841      | 9.4538       | FALSE     |
| Uncharacterized protein OS=Mus musculus GN=Ptdc3 PE=2 SV=1   | Q3UK51           | Ptdc3        | 78 kDa  | 0            | 0           | 0            | 1.225       | 0.85944      | FALSE     |
| Uncharacterized protein OS=Mus musculus GN=Ptges3 PE=2 SV=1  | Q3TJG6 (+1)      | Ptges3       | 19 kDa  | 0            | 0           | 0            | 3.6749      | 3.4377       | FALSE     |
| Uncharacterized protein OS=Mus musculus GN=Pura PE=2 SV=1    | Q8C6E9           | Pura         | 35 kDa  | 0            | 0           | 0            | 0.81665     | 0            | FALSE     |
| Uncharacterized protein OS=Mus musculus GN=Rabggt1 PE=2 SV=1 | Q3UIH7 (+1)      | Rabggt1      | 65 kDa  | 0            | 0           | 0            | 0           | 0.85944      | FALSE     |
| Uncharacterized protein OS=Mus musculus GN=Rela PE=2 SV=1    | Q8BTL4           | Rela         | 60 kDa  | 0            | 0           | 0            | 0           | 1.2892       | FALSE     |
| Uncharacterized protein OS=Mus musculus GN=Rhoa PE=2 SV=1    | Q3TN61 (+2)      | Rhoa         | 22 kDa  | 0            | 0           | 0            | 4.8999      | 5.5863       | FALSE     |
| Uncharacterized protein OS=Mus musculus GN=Rnf126 PE=1 SV=1  | Q3U3G2 (+1)      | Rnf126       | 34 kDa  | 0            | 0           | 0            | 0.81665     | 1.2892       | FALSE     |
| Uncharacterized protein OS=Mus musculus GN=Rps11 PE=2 SV=1   | Q9DB79           | Rps11        | 19 kDa  | 5.5246       | 6.3914      | 0            | 6.5332      | 6.8755       | FALSE     |
| Uncharacterized protein OS=Mus musculus GN=Rsl1d1 PE=2 SV=1  | Q3TAJ5           | Rsl1d1       | 44 kDa  | 0            | 0           | 0            | 0.81665     | 2.1486       | FALSE     |
| Uncharacterized protein OS=Mus musculus GN=Rtca PE=2 SV=1    | Q3TIJ4 (+3)      | Rtca         | 39 kDa  | 0            | 0           | 0            | 1.225       | 1.7189       | FALSE     |
| Uncharacterized protein OS=Mus musculus GN=Sec23b PE=2 SV=1  | Q3TAW4 (+4)      | Sec23b       | 86 kDa  | 0            | 0           | 3.5789       | 5.7166      | 5.1566       | FALSE     |
| Uncharacterized protein OS=Mus musculus GN=Sf3a1 PE=2 SV=1   | Q3TVM1 (+1)      | Sf3a1        | 89 kDa  | 0            | 0           | 0            | 1.225       | 0            | FALSE     |
| Uncharacterized protein OS=Mus musculus GN=Sh3kbp1 PE=2 SV=1 | Q3TA88 (+1)      | Sh3kbp1      | 73 kDa  | 0            | 3.1957      | 0            | 4.8999      | 3.4377       | FALSE     |
| Uncharacterized protein OS=Mus musculus GN=Slc12a4 PE=2 SV=1 | Q3TWW2 (+4)      | Slc12a4      | 121 kDa | 0            | 0           | 0            | 0.81665     | 2.5783       | FALSE     |
| Uncharacterized protein OS=Mus musculus GN=Slc2a1 PE=2 SV=1  | Q3U2J2           | Slc2a1       | 54 kDa  | 0            | 0           | 0            | 0.81665     | 1.7189       | FALSE     |
| Uncharacterized protein OS=Mus musculus GN=Snd1 PE=2 SV=1    | Q3TW51 (+2)      | Snd1         | 102 kDa | 0            | 4.7936      | 3.5789       | 14.291      | 12.462       | FALSE     |
| Uncharacterized protein OS=Mus musculus GN=Snx1 PE=2 SV=1    | Q3TI63 (+3)      | Snx1         | 59 kDa  | 0            | 0           | 0            | 3.6749      | 3.008        | FALSE     |
| Uncharacterized protein OS=Mus musculus GN=Ssr1 PE=2 SV=1    | Q3TV94 (+1)      | Ssr1         | 32 kDa  | 0            | 0           | 0            | 1.225       | 0.85944      | FALSE     |
| Uncharacterized protein OS=Mus musculus GN=Stub1 PE=2 SV=1   | Q3TYJ0 (+1)      | Stub1        | 35 kDa  | 0            | 0           | 0            | 0.81665     | 0            | FALSE     |
| Uncharacterized protein OS=Mus musculus GN=Tfg PE=2 SV=1     | Q9D828 (+1)      | Tfg          | 42 kDa  | 0            | 0           | 0            | 2.45        | 2.1486       | FALSE     |
| Uncharacterized protein OS=Mus musculus GN=Tmed9 PE=2 SV=1   | Q3TFU8 (+3)      | Tmed9        | 31 kDa  | 0            | 0           | 0            | 1.225       | 2.1486       | FALSE     |
| Uncharacterized protein OS=Mus musculus GN=Tmpo PE=2 SV=1    | Q3UR33 (+1)      | Tmpo         | 50 kDa  | 0            | 3.1957      | 0            | 4.4916      | 3.4377       | FALSE     |
| Uncharacterized protein OS=Mus musculus GN=Tollip PE=2 SV=1  | Q8BQL7 (+1)      | Tollip       | 30 kDa  | 0            | 0           | 0            | 0.81665     | 0            | FALSE     |
| Uncharacterized protein OS=Mus musculus GN=Tomm70a PE=2 SV=1 | Q3TSX8 (+2)      | Tomm70a      | 68 kDa  | 0            | 0           | 0            | 2.0416      | 2.1486       | FALSE     |
| Uncharacterized protein OS=Mus musculus GN=Trim25 PE=2 SV=1  | Q3TU94 (+2)      | Trim25       | 68 kDa  | 0            | 0           | 0            | 1.225       | 0            | FALSE     |
| Uncharacterized protein OS=Mus musculus GN=Tsc2 PE=2 SV=1    | Q3UHB2 (+1)      | Tsc2         | 201 kDa | 0            | 0           | 0            | 0.81665     | 1.2892       | FALSE     |

| Identified Proteins (2666)                                                                        | Accession Number | Alternate ID | MW      | VPSko-biotin | ctrl-biotin | VPSoe-biotin | ctrl lysate | VPSoe lysate | enriched? |
|---------------------------------------------------------------------------------------------------|------------------|--------------|---------|--------------|-------------|--------------|-------------|--------------|-----------|
| Uncharacterized protein OS=Mus musculus GN=Txn1 PE=2 SV=1                                         | Q3U8R9 (+1)      | Txn1         | 32 kDa  | 0            | 0           | 0            | 5.7166      | 5.5863       | FALSE     |
| Uncharacterized protein OS=Mus musculus GN=Ube2d3 PE=2 SV=1                                       | Q3U5V6 (+1)      | Ube2d3       | 17 kDa  | 0            | 0           | 0            | 1.225       | 1.2892       | FALSE     |
| Uncharacterized protein OS=Mus musculus GN=Ubqln1 PE=2 SV=1                                       | Q3T992 (+1)      | Ubqln1       | 59 kDa  | 0            | 0           | 0            | 6.9416      | 7.7349       | FALSE     |
| Uncharacterized protein OS=Mus musculus GN=Ubr2 PE=2 SV=1                                         | Q3UHE0 (+1)      | Ubr2         | 199 kDa | 0            | 0           | 0            | 0.81665     | 0.85944      | FALSE     |
| Uncharacterized protein OS=Mus musculus GN=Vat1 PE=2 SV=1                                         | Q3TXD3 (+3)      | Vat1         | 43 kDa  | 0            | 3.1957      | 0            | 3.6749      | 5.5863       | FALSE     |
| Uncharacterized protein OS=Mus musculus GN=Vdac1 PE=2 SV=1                                        | Q3THL7 (+1)      | Vdac1        | 31 kDa  | 0            | 0           | 3.5789       | 5.3082      | 7.3052       | FALSE     |
| Uncharacterized protein OS=Mus musculus GN=Vdac3 PE=2 SV=1                                        | Q3TTN3 (+2)      | Vdac3        | 31 kDa  | 3.6831       | 3.1957      | 3.5789       | 5.3082      | 6.0161       | FALSE     |
| Uncharacterized protein OS=Mus musculus GN=Wasl PE=1 SV=1                                         | Q3TXX8 (+4)      | Wasl         | 54 kDa  | 0            | 0           | 0            | 0           | 0.85944      | FALSE     |
| Uncharacterized protein OS=Mus musculus GN=Wbp11 PE=2 SV=1                                        | Q3UKQ3 (+1)      | Wbp11        | 70 kDa  | 0            | 0           | 0            | 0.81665     | 0.85944      | FALSE     |
| Uncharacterized protein OS=Mus musculus GN=Wbp2 PE=2 SV=1                                         | Q9DBP6           | Wbp2         | 37 kDa  | 0            | 0           | 0            | 0           | 0.85944      | FALSE     |
| Uncharacterized protein OS=Mus musculus GN=Wdr6 PE=2 SV=1                                         | Q3TEZ2 (+1)      | Wdr6         | 122 kDa | 0            | 0           | 0            | 1.225       | 2.5783       | FALSE     |
| Uncharacterized protein OS=Mus musculus GN=Wls PE=2 SV=1                                          | Q8CDZ6           | Wls          | 47 kDa  | 0            | 0           | 0            | 1.225       | 0.85944      | FALSE     |
| Uncharacterized protein OS=Mus musculus GN=Zfp622 PE=2 SV=1                                       | Q3U343 (+1)      | Zfp622       | 53 kDa  | 0            | 0           | 0            | 1.6333      | 1.2892       | FALSE     |
| Uncharacterized protein OS=Mus musculus PE=2 SV=1                                                 | Q8C9L6 (+1)      |              | 87 kDa  | 0            | 0           | 0            | 2.8583      | 3.008        | FALSE     |
| Uncharacterized protein OS=Mus musculus PE=2 SV=1                                                 | Q3U8H8           |              | 14 kDa  | 0            | 0           | 0            | 0.81665     | 0.85944      | FALSE     |
| Unconventional myosin-Ib OS=Mus musculus GN=Myo1b PE=1 SV=1                                       | E9Q580 (+3)      | Myo1b        | 126 kDa | 0            | 0           | 0            | 2.0416      | 2.5783       | FALSE     |
| Unconventional myosin-Ic OS=Mus musculus GN=Myo1c PE=1 SV=2                                       | Q9WTI7           | Myo1c        | 122 kDa | 0            | 0           | 0            | 8.5749      | 10.743       | FALSE     |
| Unconventional myosin-Ie OS=Mus musculus GN=Myo1e PE=1 SV=1                                       | E9Q634           | Myo1e        | 127 kDa | 0            | 0           | 0            | 0           | 0.85944      | FALSE     |
| Unconventional myosin-IXb OS=Mus musculus GN=Myo9b PE=1 SV=1                                      | A0A1D5RLD1 (+2)  | Myo9b        | 223 kDa | 0            | 0           | 0            | 0           | 1.2892       | FALSE     |
| Unconventional prefoldin RPB5 interactor OS=Mus musculus GN=Uri1 PE=1 SV=2                        | Q3TLD5           | Uri1         | 59 kDa  | 0            | 0           | 0            | 1.225       | 0            | FALSE     |
| UPF0160 protein MYG1, mitochondrial OS=Mus musculus GN=Myg1 PE=1 SV=1                             | Q9JK81           | Myg1         | 43 kDa  | 0            | 0           | 0            | 4.0833      | 3.8675       | FALSE     |
| UPF0696 protein C11orf68 homolog OS=Mus musculus GN=Bles03 PE=1 SV=1                              | Q8VD62           | Bles03       | 28 kDa  | 0            | 0           | 0            | 0           | 0.85944      | FALSE     |
| Uroporphyrinogen decarboxylase OS=Mus musculus GN=Urod PE=1 SV=2                                  | P70697           | Urod         | 41 kDa  | 0            | 0           | 0            | 0.81665     | 0            | FALSE     |
| UTP-glucose-1-phosphate uridylyltransferase OS=Mus musculus GN=Ugp2 PE=2 SV=1                     | Q3U548 (+2)      | Ugp2         | 56 kDa  | 0            | 0           | 0            | 4.4916      | 3.4377       | FALSE     |
| UV excision repair protein RAD23 homolog B OS=Mus musculus GN=Rad23b PE=1 SV=2                    | P54728 (+3)      | Rad23b       | 44 kDa  | 0            | 0           | 0            | 3.2666      | 1.2892       | FALSE     |
| V-type proton ATPase catalytic subunit A OS=Mus musculus GN=Atp6v1a PE=1 SV=2                     | P50516           | Atp6v1a      | 68 kDa  | 0            | 0           | 0            | 2.8583      | 5.1566       | FALSE     |
| V-type proton ATPase subunit C OS=Mus musculus GN=Atp6v1c1 PE=2 SV=1                              | Q3TG21 (+2)      | Atp6v1c1     | 44 kDa  | 0            | 0           | 0            | 0.81665     | 0.85944      | FALSE     |
| V-type proton ATPase subunit H OS=Mus musculus GN=Atp6v1h PE=1 SV=1                               | Q8BVE3 (+2)      | Atp6v1h      | 56 kDa  | 0            | 0           | 0            | 1.6333      | 0.85944      | FALSE     |
| Vacuolar protein sorting 36 (Yeast) OS=Mus musculus GN=Vps36 PE=1 SV=1                            | Q3TSR1 (+1)      | Vps36        | 44 kDa  | 0            | 0           | 0            | 1.225       | 0.85944      | FALSE     |
| Vacuolar protein sorting-associated protein 11 homolog OS=Mus musculus GN=Vps11 PE=1 SV=3         | Q91W86           | Vps11        | 108 kDa | 0            | 0           | 0            | 0           | 0.85944      | FALSE     |
| Vacuolar protein sorting-associated protein 26A OS=Mus musculus GN=Vps26a PE=1 SV=1               | P40336           | Vps26a       | 38 kDa  | 0            | 0           | 0            | 2.45        | 3.008        | FALSE     |
| Vacuolar protein sorting-associated protein 26B OS=Mus musculus GN=Vps26b PE=1 SV=1               | Q8C0E2           | Vps26b       | 39 kDa  | 0            | 0           | 0            | 1.225       | 0            | FALSE     |
| Vacuolar protein sorting-associated protein 29 OS=Mus musculus GN=Vps29 PE=1 SV=1                 | Q9QZ88           | Vps29        | 20 kDa  | 0            | 0           | 0            | 2.45        | 2.5783       | FALSE     |
| Vacuolar protein sorting-associated protein 45 OS=Mus musculus GN=Vps45 PE=1 SV=1                 | P97390 (+1)      | Vps45        | 65 kDa  | 0            | 0           | 0            | 1.225       | 0            | FALSE     |
| Vacuolar protein sorting-associated protein 4B OS=Mus musculus GN=Vps4b PE=1 SV=2                 | P46467 (+1)      | Vps4b        | 49 kDa  | 0            | 0           | 0            | 2.45        | 1.2892       | FALSE     |
| Vasodilator-stimulated phosphoprotein OS=Mus musculus GN=Vasp PE=1 SV=4                           | P70460           | Vasp         | 40 kDa  | 0            | 0           | 0            | 2.0416      | 2.1486       | FALSE     |
| Vesicle transport protein GOT1B OS=Mus musculus GN=Golt1b PE=1 SV=1                               | Q9CR60           | Golt1b       | 15 kDa  | 0            | 0           | 0            | 1.225       | 1.2892       | FALSE     |
| Vesicle-associated membrane protein 3 OS=Mus musculus GN=Vamp3 PE=1 SV=1                          | P63024           | Vamp3        | 11 kDa  | 0            | 0           | 0            | 0.81665     | 1.7189       | FALSE     |
| Vesicle-associated membrane protein 8 OS=Mus musculus GN=Vamp8 PE=1 SV=1                          | A0A0R4J0R1 (+1)  | Vamp8        | 11 kDa  | 0            | 0           | 0            | 0.81665     | 0.85944      | FALSE     |
| Vesicle-associated membrane protein, associated protein B and C OS=Mus musculus GN=Vapb PE=1 SV=1 | Q8BH80 (+1)      | Vapb         | 27 kDa  | 0            | 0           | 0            | 2.0416      | 3.4377       | FALSE     |
| Vesicle-fusing ATPase OS=Mus musculus GN=Nsf PE=1 SV=2                                            | P46460           | Nsf          | 83 kDa  | 0            | 0           | 0            | 2.8583      | 3.4377       | FALSE     |
| Vesicle-trafficking protein SEC22b OS=Mus musculus GN=Sec22b PE=1 SV=3                            | O08547           | Sec22b       | 25 kDa  | 0            | 0           | 0            | 2.0416      | 2.1486       | FALSE     |
| Vesicular integral-membrane protein VIP36 OS=Mus musculus GN=Lman2 PE=1 SV=2                      | Q9DBH5           | Lman2        | 40 kDa  | 0            | 0           | 0            | 5.3082      | 4.2972       | FALSE     |
| von Willebrand factor A domain-containing protein 5A OS=Mus musculus GN=Vwa5a PE=1 SV=2           | Q99KC8           | Vwa5a        | 87 kDa  | 0            | 0           | 0            | 3.2666      | 1.7189       | FALSE     |
| von Willebrand factor A domain-containing protein 8 OS=Mus musculus GN=Vwa8 PE=1 SV=2             | Q8CC88           | Vwa8         | 213 kDa | 0            | 0           | 0            | 0           | 1.2892       | FALSE     |
| Wars protein OS=Mus musculus GN=Wars PE=2 SV=1                                                    | Q4FJZ4           | Wars         | 54 kDa  | 0            | 0           | 0            | 2.45        | 3.4377       | FALSE     |
| WASH complex subunit 2 OS=Mus musculus GN=Washc2 PE=1 SV=1                                        | Q6PGL7           | Washc2       | 145 kDa | 0            | 0           | 0            | 1.6333      | 0.85944      | FALSE     |
| WD repeat and HMGB-box DNA-binding protein 1 OS=Mus musculus GN=Wdhd1 PE=1 SV=2                   | P59328           | Wdhd1        | 124 kDa | 0            | 0           | 0            | 3.6749      | 6.0161       | FALSE     |
| WD repeat domain phosphoinositide-interacting protein 1 OS=Mus musculus GN=Wipi1 PE=1 SV=1        | Q8R3E3           | Wipi1        | 49 kDa  | 0            | 0           | 0            | 0           | 0.85944      | FALSE     |
| WD repeat domain phosphoinositide-interacting protein 2 OS=Mus musculus GN=Wipi2 PE=1 SV=1        | Q80W47           | Wipi2        | 48 kDa  | 0            | 0           | 0            | 1.225       | 1.2892       | FALSE     |
| WD repeat domain phosphoinositide-interacting protein 3 OS=Mus musculus GN=Wdr45b PE=1 SV=1       | Q9CR39           | Wdr45b       | 38 kDa  | 0            | 0           | 0            | 0.81665     | 1.2892       | FALSE     |

| Identified Proteins (2666)                                                                           | Accession Number | Alternate ID | MW      | VPSko-biotin | ctrl-biotin | VPSoe-biotin | ctrl lysate | VPSoe lysate | enriched? |
|------------------------------------------------------------------------------------------------------|------------------|--------------|---------|--------------|-------------|--------------|-------------|--------------|-----------|
| WD40 repeat-containing protein SMU1 OS=Mus musculus GN=Smu1 PE=2 SV=2                                | Q3UKJ7           | Smu1         | 58 kDa  | 0            | 0           | 0            | 0.81665     | 0            | FALSE     |
| Wings apart-like protein homolog OS=Mus musculus GN=Wapl PE=1 SV=2                                   | Q65Z40           | Wapl         | 134 kDa | 0            | 0           | 0            | 1.225       | 2.1486       | FALSE     |
| Wiskott-Aldrich syndrome protein family member 2 OS=Mus musculus GN=Wasf2 PE=1 SV=1                  | Q8BH43           | Wasf2        | 54 kDa  | 0            | 0           | 0            | 3.2666      | 2.1486       | FALSE     |
| X-prolyl aminopeptidase OS=Mus musculus GN=Xpnpep1 PE=2 SV=1                                         | Q3UKF5 (+1)      | Xpnpep1      | 70 kDa  | 0            | 0           | 0            | 2.8583      | 3.8675       | FALSE     |
| X-ray repair cross-complementing protein 5 OS=Mus musculus GN=Xrcc5 PE=1 SV=4                        | P27641           | Xrcc5        | 83 kDa  | 0            | 0           | 0            | 2.0416      | 1.7189       | FALSE     |
| Xanthine dehydrogenase/oxidase OS=Mus musculus GN=Xdh PE=1 SV=5                                      | Q00519           | Xdh          | 147 kDa | 0            | 0           | 0            | 6.9416      | 8.5944       | FALSE     |
| XIAP-associated factor 1 OS=Mus musculus GN=Xaf1 PE=1 SV=3                                           | Q5NBU8           | Xaf1         | 31 kDa  | 0            | 0           | 0            | 0.81665     | 0            | FALSE     |
| Y+L amino acid transporter 2 OS=Mus musculus GN=Slc7a6 PE=1 SV=1                                     | Q8BGK6           | Slc7a6       | 57 kDa  | 0            | 0           | 0            | 1.225       | 0            | FALSE     |
| Zinc finger C2HC domain-containing protein 1A OS=Mus musculus GN=Zc2hc1a PE=1 SV=1                   | Q8BJH1           | Zc2hc1a      | 35 kDa  | 0            | 0           | 0            | 1.225       | 0.85944      | FALSE     |
| Zinc finger CCCH domain-containing protein 15 OS=Mus musculus GN=Zc3h15 PE=1 SV=2                    | Q3TIV5           | Zc3h15       | 48 kDa  | 0            | 0           | 0            | 2.45        | 3.4377       | FALSE     |
| Zinc finger CCCH type-containing 7B OS=Mus musculus GN=Zc3h7b PE=1 SV=1                              | F8VPP8           | Zc3h7b       | 110 kDa | 0            | 0           | 0            | 0           | 0.85944      | FALSE     |
| Zinc finger CCCH-type antiviral protein 1 OS=Mus musculus GN=Zc3hav1 PE=1 SV=1                       | D3Z511           | Zc3hav1      | 113 kDa | 0            | 0           | 0            | 4.0833      | 2.1486       | FALSE     |
| Zinc finger protein 330 OS=Mus musculus GN=Znf330 PE=1 SV=1                                          | Q922H9           | Znf330       | 36 kDa  | 0            | 0           | 0            | 0           | 1.2892       | FALSE     |
| Zinc finger protein ZPR1 (Fragment) OS=Mus musculus GN=Zpr1 PE=1 SV=1                                | F8WHU9 (+3)      | Zpr1         | 42 kDa  | 0            | 0           | 0            | 1.6333      | 1.2892       | FALSE     |
| Zinc finger protein-like 1 OS=Mus musculus GN=Zfp1 PE=1 SV=1                                         | Q9DB43           | Zfp1         | 34 kDa  | 0            | 0           | 0            | 1.225       | 0            | FALSE     |
| Zinc finger Ran-binding domain-containing protein 2 OS=Mus musculus GN=Zranb2 PE=1 SV=1              | B2RRT9 (+2)      | Zranb2       | 37 kDa  | 0            | 0           | 0            | 0           | 1.7189       | FALSE     |
| Zinc metalloproteinase, STE24 homolog ( <i>S. cerevisiae</i> ) OS=Mus musculus GN=Zmpste24 PE=1 SV=1 | B9EHY2 (+1)      | Zmpste24     | 55 kDa  | 0            | 0           | 0            | 1.6333      | 1.2892       | FALSE     |
| Zinc phosphodiesterase ELAC protein 2 OS=Mus musculus GN=Elac2 PE=1 SV=1                             | B1ATP7 (+2)      | Elac2        | 92 kDa  | 0            | 0           | 0            | 2.8583      | 3.4377       | FALSE     |
| Zinc transporter 7 OS=Mus musculus GN=Slc30a7 PE=1 SV=1                                              | Q9JKN1           | Slc30a7      | 42 kDa  | 0            | 0           | 0            | 0.81665     | 1.2892       | FALSE     |
