# Supplementary material for: Endocytic recycling is central to circadian collagen fibrillogenesis and disrupted in fibrosis
Source: bioRxiv preprint, doi:10.1101/2021.03.25.436925, version 4 (2024-09-24)
Supplement: Table S1 [file 436925_file04.xlsx]

## Sheet: Proteins
Supplementary Table S1. Excel spreadsheet of proteins identified in total lysates, report from Proteome Discoverer
Checked	Protein FDR Confidence: Combined	Master	Accession	Gene	Description	Exp. q-value: Combined	Sum PEP Score	Coverage [%]	# Peptides	# PSMs	# Unique Peptides	# AAs	MW [kDa]	calc. pI	Score Sequest HT: A2 Sequest HT	Score Sequest HT: A5 Sequest HT	Score Sequest HT: A8 Sequest HT	# Peptides (by Search Engine): A2 Sequest HT	# Peptides (by Search Engine): A5 Sequest HT	# Peptides (by Search Engine): A8 Sequest HT	# Protein Pathway Groups	Found in Sample: [S4] F4: Sample	Found in Sample: [S5] F5: Sample	# Protein Groups	Acetyl (N-term) Count	Acetyl (N-term) Positions	Deamidated (N; Q) Count	Deamidated (N; Q) Positions	Phospho (S; T; Y) Count	Phospho (S; T; Y) Positions	Modifications
FALSE	High	Master Protein	A2A432	Cul4b	Cullin-4B [OS=Mus musculus]	0	189.061	37	33	91	23	970	110.6	8.37	152.83	3.58		33	1		0	High	High	1	0		1	Deamidated [N231]	0		Carbamidomethyl [C156; C590; C787; C844; C867]; Deamidated [N231]
FALSE	High	Master Protein	A2A5R2	Arfgef2	Brefeldin A-inhibited guanine nucleotide-exchange protein 2 [OS=Mus musculus]	0	21.351	4	7	8	4	1792	202.1	6.55	7.28			7			0	High	Not Found	1	0		0		0		Carbamidomethyl [C1668; C1669]
FALSE	High	Master Protein	A2A6Q5	Cdc27	cell division cycle protein 27 homolog [OS=Mus musculus]	0	12.304	5	4	5	4	825	91.8	7.02	2.13			4			0	High	High	1	0		0		0
FALSE	High	Master Protein	A2A8Z1	Osbpl9	Oxysterol-binding protein-related protein 9 [OS=Mus musculus]	0	40.392	17	10	18	10	736	83.1	6.07	22.97			10			0	High	High	1	0		0		0
FALSE	High	Master Protein	A2AAY5	Sh3pxd2b	SH3 and PX domain-containing protein 2B [OS=Mus musculus]	0	96.756	26	20	49	17	908	101.5	8.66	86.57			20			0	High	High	1	0		0		0		Carbamidomethyl [C102; C773]
FALSE	High	Master Protein	A2ADY9	Ddi2	Protein DDI1 homolog 2 [OS=Mus musculus]	0	37.916	18	5	14	5	399	44.6	5.05	35.05			5			0	High	High	1	0		0		0
FALSE	High	Master Protein	A2AF47	Dock11	dedicator of cytokinesis protein 11 [OS=Mus musculus]	0	59.263	8	16	25	15	2073	237.6	7.78	30.56			16			0	High	High	1	0		0		0
FALSE	High	Master Protein	A2AGT5	Ckap5	Cytoskeleton-associated protein 5 [OS=Mus musculus]	0	234.633	25	44	94	44	2032	225.5	7.96	184.47			44			0	High	High	1	0		0		0		Oxidation [M1451; M1710]; Carbamidomethyl [C441; C619; C1768]
FALSE	High	Master Protein	A2AJ15	Man1b1	endoplasmic reticulum mannosyl-oligosaccharide 1,2-alpha-mannosidase [OS=Mus musculus]	0	6.055	3	2	2	2	658	75.1	8.48	4.16			2			0	High	Not Found	1	0		0		0
FALSE	High	Master Protein	A2AJI0	Map7d1	MAP7 domain-containing protein 1 [OS=Mus musculus]	0	41.882	14	9	14	9	846	93.2	10.15	35.56			9			0	High	High	1	0		0		0		Carbamidomethyl [C375]
FALSE	High	Master Protein	A2AKG8	Focad	focadhesin [OS=Mus musculus]	0	10.898	2	3	5	3	1798	198.8	6.74	4.36			3			0	High	High	1	0		0		0
FALSE	High	Master Protein	A2ALW5	Dnajc25	dnaJ homolog subfamily C member 25 [OS=Mus musculus]	0	12.78	10	3	4	3	357	41.9	9.11	4.75			3			0	High	High	1	0		0		0		Carbamidomethyl [C49]
FALSE	High	Master Protein	A2AN08	Ubr4	e3 ubiquitin-protein ligase UBR4 [OS=Mus musculus]	0	411.191	19	87	185	87	5180	571.9	6.06	311.93	2.95	3.89	85	1	1	0	High	High	1	0		1	Deamidated [N221]	0		Carbamidomethyl [C122; C779; C1033; C1678; C1681; C1690; C1693; C1713; C1715; C1723; C1898; C3411; C3697; C3700; C3703; C3801; C3804; C3869; C3872; C3880; C3927; C3982; C4427; C4479; C4484; C4943]; Oxidation [M1873; M2738]; Deamidated [N221]
FALSE	High	Master Protein	A2AQ07	Tubb1	tubulin beta-1 chain [OS=Mus musculus]	0	66.505	11	7	171	1	451	50.4	5.07	402.72			7			0	High	Not Found	1	0		0		0		Oxidation [M170; M257]; Carbamidomethyl [C354]
FALSE	High	Master Protein	A2AQ19	Rtf1	RNA polymerase-associated protein RTF1 homolog [OS=Mus musculus]	0	55.274	17	13	27	13	715	80.7	8.16	47.46			13			0	High	High	1	0		0		0		Carbamidomethyl [C378]
FALSE	High	Master Protein	A2ASS6	Ttn	Titin [OS=Mus musculus]	0.003	3.068	0	2	3	2	35213	3904.1	6.2	2.34			2			0	High	Not Found	1	0		0		0
FALSE	High	Master Protein	A2AWA9	Rabgap1	Rab GTPase-activating protein 1 [OS=Mus musculus]	0	100.438	22	21	42	21	1064	120.7	5.25	69.6			21			0	High	High	1	0		0		0		Carbamidomethyl [C213; C225; C245; C341; C688; C800; C936]
FALSE	High	Master Protein	A2RSJ4	Uhrf1bp1l	UHRF1-binding protein 1-like [OS=Mus musculus]	0	14.728	3	3	3	3	1457	161.8	6.61	2.27			3			0	High	Not Found	1	0		0		0
FALSE	High	Master Protein	A2RSY6	Trmt1l	TRMT1-like protein [OS=Mus musculus]	0	10.374	6	4	5	4	728	80.8	7.5	0		2.54	3		1	0	High	High	1	0		0		0
FALSE	High	Master Protein	A2RTL5	Rsrc2	Arginine/serine-rich coiled-coil protein 2 [OS=Mus musculus]	0	15.209	10	3	3	3	376	43.9	11.46	5.62			3			0	High	High	1	0		0		0		Carbamidomethyl [C324]
FALSE	High	Master Protein	A3KGB4	Tbc1d8b	TBC1 domain family member 8B [OS=Mus musculus]	0	75.689	19	17	30	16	1114	127.8	5.49	39.15		5.76	16		1	0	High	High	1	0		0		0		Carbamidomethyl [C80; C305; C467]
FALSE	High	Master Protein	A6H5Y3	Mtr	methionine synthase [OS=Mus musculus]	0	19.17	5	6	10	6	1253	139	5.57	11.54			6			0	High	High	1	0		0		0
FALSE	High	Master Protein	A6H8H2	Dennd4c	DENN domain-containing protein 4C [OS=Mus musculus]	0	36.715	6	10	15	10	1906	211.3	6.4	9.66			10			0	High	High	1	0		0		0		Carbamidomethyl [C88; C1444]
FALSE	High	Master Protein	A6X919	Dpy19l1	Probable C-mannosyltransferase DPY19L1 [OS=Mus musculus]	0	81.213	21	14	33	14	746	84.1	9.16	72.89			14			0	High	High	1	0		0		0		Carbamidomethyl [C205; C718]
FALSE	High	Master Protein	A8C756	Thada	Thyroid adenoma-associated protein homolog [OS=Mus musculus]	0	37.044	6	11	19	11	1938	217.2	6.25	11.39			11			0	High	High	1	0		0		0		Carbamidomethyl [C613]
FALSE	High	Master Protein	A8Y5H7	Sec14l1	SEC14-like protein 1 [OS=Mus musculus]	0	32.418	11	6	10	6	715	81.2	6.34	17.28	2		5	1		0	High	High	1	0		1	Deamidated [N424]	0		Carbamidomethyl [C614; C644]; Deamidated [N424]
FALSE	High	Master Protein	B0V2N1	Ptprs	Receptor-type tyrosine-protein phosphatase S [OS=Mus musculus]	0	14.835	2	4	5	2	1907	211.8	7.23	10.17			4			0	Not Found	High	1	0		0		0
FALSE	High	Master Protein	B1AVZ0	Uprt	Uracil phosphoribosyltransferase homolog [OS=Mus musculus]	0	13.86	17	5	8	5	310	34.3	6.23	10.24			5			0	High	High	1	0		0		0		Carbamidomethyl [C181]
FALSE	High	Master Protein	B1AY10	Nfx1	Transcriptional repressor NF-X1 [OS=Mus musculus]	0	7.017	2	2	4	2	1114	123.7	8.31	6.1			2			0	High	High	1	0		0		0		Carbamidomethyl [C289; C434; C438]
FALSE	High	Master Protein	B1AY13	Usp24	Ubiquitin carboxyl-terminal hydrolase 24 [OS=Mus musculus]	0	52.656	5	13	18	12	2617	293.8	6.19	24.92			13			0	High	High	1	0		0		0		Carbamidomethyl [C169; C595; C799]
FALSE	High	Master Protein	B1AZP2	Dlgap4	Disks large-associated protein 4 [OS=Mus musculus]	0	9.34	3	2	2	2	992	108	7.08	2.96		3.46	1		1	0	High	High	1	0		0		0		Carbamidomethyl [C736; C864]
FALSE	High	Master Protein	B2RQC6	Cad	CAD protein [OS=Mus musculus]	0	521.842	39	77	269	77	2225	243.1	6.43	516.55	12.21	17.2	70	3	6	0	High	High	1	0		2	Deamidated [N434; Q1630]	1	Phospho [S1859]	Deamidated [N434; Q1630]; Oxidation [M522; M766; M1303; M1882; M1984; M2211; M2215]; Carbamidomethyl [C179; C183; C280; C379; C736; C787; C834; C868; C897; C986; C1078; C1085; C1296; C1374; C1455; C1636; C1889; C2092]; Phospho [S1859]
FALSE	High	Master Protein	B2RRE7	Otud4	OTU domain-containing protein 4 [OS=Mus musculus]	0	40.088	12	9	15	9	1107	123	6.76	32.54			9			0	High	High	1	0		0		0		Carbamidomethyl [C539; C681]
FALSE	High	Master Protein	B2RU80	Ptprb	Receptor-type tyrosine-protein phosphatase beta [OS=Mus musculus]	0	5.72	1	2	7	1	1998	224.4	7.18	5.9			2			0	High	Not Found	1	0		0		0
FALSE	High	Master Protein	B2RUR8	Otud7b	OTU domain-containing protein 7B [OS=Mus musculus]	0	28.681	9	6	10	6	840	91.9	6.86	15.62			6			0	High	High	1	0		0		0
FALSE	High	Master Protein	B2RVL6	Zcchc24	Zinc finger CCHC domain-containing protein 24 [OS=Mus musculus]	0	6.912	11	3	6	3	241	26.9	8.7	1.68			3			0	High	High	1	0		0		0		Carbamidomethyl [C237]
FALSE	High	Master Protein	B2RWS6	Ep300	Histone acetyltransferase p300 [OS=Mus musculus]	0	21.989	3	7	13	2	2412	263.1	8.54	16.47			7			0	High	High	1	0		0		0		Carbamidomethyl [C1669; C1672; C1788; C1789]
FALSE	High	Master Protein	B2RX14	Tut4	Terminal uridylyltransferase 4 [OS=Mus musculus]	0.001	3.939	1	2	3	1	1644	184.5	8.19	3.36			2			0	Not Found	High	1	0		0		0
FALSE	High	Master Protein	B2RXC1	Trappc11	trafficking protein particle complex subunit 11 [OS=Mus musculus]	0	28.852	6	6	11	6	1133	128.3	7.58	12.34			6			0	High	High	1	0		0		0		Carbamidomethyl [C658]
FALSE	High	Master Protein	B2RXS4	Plxnb2	Plexin-B2 [OS=Mus musculus]	0	215.623	24	37	93	37	1842	206.1	5.87	195.84			37			0	High	High	1	0		0		0		Carbamidomethyl [C112; C313; C471; C477; C480; C488; C491; C617; C769; C772; C848; C940; C983; C1488]
FALSE	High	Master Protein	B2RY04	Dock5	dedicator of cytokinesis protein 5 [OS=Mus musculus]	0	19.875	4	6	7	6	1868	214.3	7.55	7.25			6			0	High	High	1	0		0		0
FALSE	High	Master Protein	B7ZMP1	Xpnpep3	Probable Xaa-Pro aminopeptidase 3 [OS=Mus musculus]	0	10.997	5	3	7	3	506	56.6	7.68	11.24			3			0	High	High	1	0		0		0		Carbamidomethyl [C290]
FALSE	High	Master Protein	B8ZXI1	Qtrt2	Queuine tRNA-ribosyltransferase accessory subunit 2 [OS=Mus musculus]	0	9.155	5	2	4	2	415	46.3	6.16	9.76			2			0	High	High	1	0		0		0
FALSE	High	Master Protein	B9EJ86	Osbpl8	Oxysterol-binding protein-related protein 8 [OS=Mus musculus]	0	36.908	12	7	9	7	889	101.2	6.96	10.82			7			0	High	High	1	0		0		0
FALSE	High	Master Protein	B9EJR8	Dnaaf5	Dynein assembly factor 5, axonemal [OS=Mus musculus]	0	19.034	7	6	8	6	853	93.8	6.15	7.07			6			0	High	High	1	0		0		0		Carbamidomethyl [C185; C187; C610]
FALSE	High	Master Protein	B9EKI3	Tmf1	TATA element modulatory factor [OS=Mus musculus]	0	17.345	6	5	7	5	1091	121.7	4.87	4.17			5			0	High	High	1	0		0		0		Carbamidomethyl [C313; C314]
FALSE	High	Master Protein	C0HK79	Arxes1	Adipocyte-related X-chromosome expressed sequence 1 [OS=Mus musculus]	0	9.165	11	2	2	2	180	20.1	9.6	4.95			2			0	High	Not Found	1	0		0		0
FALSE	High	Master Protein	C0HKD8	Mfap1a	microfibrillar-associated protein 1A [OS=Mus musculus]	0	10.317	8	2	3	2	439	51.9	4.98	5.72			2			0	High	High	1	0		0		0
FALSE	High	Master Protein	D0QMC3	Mndal	myeloid cell nuclear differentiation antigen-like protein [OS=Mus musculus]	0	103.602	29	14	39	2	538	60.5	9.28	70.77		6.89	13		1	0	High	High	1	0		0		0		Carbamidomethyl [C266; C267; C476; C490]; Oxidation [M338]
FALSE	High	Master Protein	D3YYU8	Obsl1	Obscurin-like protein 1 [OS=Mus musculus]	0	111.986	15	23	50	23	1804	197.8	5.41	93.76		8.83	22		1	0	High	High	1	0		0		0		Carbamidomethyl [C13; C209; C362; C412; C581; C738; C788; C879; C920; C923; C1011]
FALSE	High	Master Protein	D3YZP9	Ccdc6	coiled-coil domain-containing protein 6 [OS=Mus musculus]	0	5.364	4	2	3	2	469	52.9	7.34	2.87			2			0	High	Not Found	1	0		0		0
FALSE	High	Master Protein	D3Z7P3	Gls	Glutaminase kidney isoform, mitochondrial [OS=Mus musculus]	0	164.993	44	23	50	4	674	73.9	7.99	126.53		4.52	21		2	0	High	High	1	0		0		0		Carbamidomethyl [C183; C208; C288; C292; C523; C530; C614]
FALSE	High	Master Protein	E2JF22	Piezo1	Piezo-type mechanosensitive ion channel component 1 [OS=Mus musculus]	0	26.646	4	8	14	8	2547	291.8	7.5	19.2			8			0	High	High	1	0		0		0		Carbamidomethyl [C962]
FALSE	High	Master Protein	E9PVA8	Gcn1	eIF-2-alpha kinase activator GCN1 [OS=Mus musculus]	0	372.102	30	76	165	76	2671	292.8	7.36	298.07			76			0	High	High	1	0		0		0		Carbamidomethyl [C246; C329; C449; C932; C939; C1527; C1535; C2015; C2179; C2558; C2563; C2647]; Met-loss [N-Term]
FALSE	High	Master Protein	E9PVB5	Ttc17	Tetratricopeptide repeat protein 17 [OS=Mus musculus]	0.005	2.825	1	2	3	2	1198	135.4	6.47	0			2			0	High	High	1	0		0		0
FALSE	High	Master Protein	E9PVX6	Mki67	Proliferation marker protein Ki-67 [OS=Mus musculus]	0	24.343	2	5	7	5	3177	350.7	9.72	9.51			5			0	High	High	1	0		0		0		Met-loss+Acetyl [N-Term]; Carbamidomethyl [C35]
FALSE	High	Master Protein	E9PZJ8	Ascc3	Activating signal cointegrator 1 complex subunit 3 [OS=Mus musculus]	0	71.381	8	14	19	14	2198	250.4	7.02	36.46			14			0	High	High	1	0		0		0		Carbamidomethyl [C324; C748]
FALSE	High	Master Protein	E9Q1P8	Irf2bp2	Interferon regulatory factor 2-binding protein 2 [OS=Mus musculus]	0	80.394	31	12	25	9	570	59.3	8.69	57.68			12			0	High	High	1	0		0		0		Carbamidomethyl [C16; C19; C504; C513; C516; C532]
FALSE	High	Master Protein	E9Q414	Apob	apolipoprotein B-100 [OS=Mus musculus]	0	4.34	0	2	3	2	4505	509.1	6.81	5.18			2			0	High	High	1	0		0		0
FALSE	High	Master Protein	E9Q555	Rnf213	E3 ubiquitin-protein ligase RNF213 [OS=Mus musculus]	0	919.446	35	163	303	163	5152	584.4	6.8	588.97	4.14		162	1		0	High	High	1	0		1	Deamidated [N5098]	0		Deamidated [N5098]; Carbamidomethyl [C386; C390; C472; C586; C653; C674; C764; C951; C955; C971; C980; C992; C1188; C1288; C1380; C1592; C1639; C1698; C1710; C1767; C1892; C1899; C2190; C2196; C2373; C2385; C2594; C2671; C2770; C2829; C2879; C2904; C3220; C3289; C3469; C3471; C3484; C3908; C3918; C3929; C3931; C4251; C4310; C4455; C5004]; Oxidation [M473; M893; M3382; M3410; M4238]
FALSE	High	Master Protein	E9Q557	Dsp	Desmoplakin [OS=Mus musculus]	0	24.861	3	9	9	9	2883	332.7	6.8	6.84			9			0	High	High	1	0		0		0
FALSE	High	Master Protein	E9Q5C9	Nolc1	nucleolar and coiled-body phosphoprotein 1 [OS=Mus musculus]	0	19.72	8	5	9	5	702	73.7	9.36	7.72			5			0	High	High	1	0		0		0
FALSE	High	Master Protein	E9Q5G3	Kif23	Kinesin-like protein KIF23 [OS=Mus musculus]	0	8.797	2	2	2	2	953	108.7	8.66	2.39			2			0	Not Found	High	1	0		0		0		Carbamidomethyl [C370]
FALSE	High	Master Protein	E9Q634	Myo1e	unconventional myosin-Ie [OS=Mus musculus]	0	35.294	9	10	16	10	1107	126.7	9.07	23.46			10			0	High	High	1	0		0		0		Carbamidomethyl [C519; C790; C960]
FALSE	High	Master Protein	E9Q8D0	Dnajc21	DnaJ homolog subfamily C member 21 [OS=Mus musculus]	0	21.421	8	3	3	3	531	61.7	5.9	9.77			3			0	High	High	1	0		0		0		Carbamidomethyl [C485; C488]
FALSE	High	Master Protein	E9QAM5	Helz2	Helicase with zinc finger domain 2 [OS=Mus musculus]	0	91.209	7	19	25	19	2947	331.4	8.07	44.13			19			0	High	Not Found	1	0		0		0		Carbamidomethyl [C1067; C1077; C2925]; Oxidation [M2704]
FALSE	High	Master Protein	F6ZDS4	Tpr	Nucleoprotein TPR [OS=Mus musculus]	0	6.349	1	2	2	2	2431	273.8	5.03	2.8			2			0	High	Not Found	1	0		0		0
FALSE	High	Master Protein	F8VPU2	Farp1	FERM, RhoGEF and pleckstrin domain-containing protein 1 [OS=Mus musculus]	0	165.561	26	23	68	23	1048	118.8	7.88	153.61	3.14		23	1		0	High	High	1	0		0		1	Phospho [T24]	Carbamidomethyl [C309; C409; C418; C524; C918]; Phospho [T24]; Met-loss+Acetyl [N-Term]
FALSE	High	Master Protein	G3X9K3	Arfgef1	Brefeldin A-inhibited guanine nucleotide-exchange protein 1 [OS=Mus musculus]	0	20.333	4	7	11	4	1846	208.4	5.86	10.21			7			0	High	High	1	0		0		0		Carbamidomethyl [C1682]
FALSE	High	Master Protein	G5E829	Atp2b1	Plasma membrane calcium-transporting ATPase 1 [OS=Mus musculus]	0	228.329	32	32	82	23	1220	134.7	5.91	183.52			32			0	High	High	1	0		0		0		Carbamidomethyl [C60; C463; C473; C649; C722; C733]; Met-loss+Acetyl [N-Term]; Oxidation [M4; M706]
FALSE	High	Master Protein	G5E870	Trip12	E3 ubiquitin-protein ligase TRIP12 [OS=Mus musculus]	0	69.648	10	14	18	14	2025	224	8.35	28.06	2.19		13	1		0	High	High	1	0		1	Deamidated [Q24]	0		Carbamidomethyl [C1258]; Deamidated [Q24]
FALSE	High	Master Protein	G5E8K5	Ank3	Ankyrin-3 [OS=Mus musculus]	0	60.969	10	15	23	11	1961	213.9	6.7	25.67			15			0	High	High	1	0		0		0		Carbamidomethyl [C391]
FALSE	High	Master Protein	G5E8P0	Tubgcp6	gamma-tubulin complex component 6 [OS=Mus musculus]	0	8.718	3	2	3	2	1769	197.1	5.95	2.01			2			0	Not Found	High	1	0		0		0
FALSE	High	Master Protein	O08528	Hk2	Hexokinase-2 [OS=Mus musculus]	0	201.493	39	35	104	31	917	102.5	6.11	200.12		2.44	34		1	0	High	High	1	0		0		0		Carbamidomethyl [C158; C368; C375; C438; C628; C823; C834; C886; C909]; Oxidation [M63; M455; M744; M748]
FALSE	High	Master Protein	O08529	Capn2	Calpain-2 catalytic subunit [OS=Mus musculus]	0	232.148	44	29	127	29	700	79.8	4.96	285.02			29			0	High	High	1	0		0		0		Carbamidomethyl [C82; C301; C341; C350; C405; C498; C577; C640]; Oxidation [M383; M580; M583; M622; M627]
FALSE	High	Master Protein	O08539	Bin1	Isoform 2 of Myc box-dependent-interacting protein 1 [OS=Mus musculus]	0	101.236	42	16	40	16	434	48	5.15	65.3			16			0	High	High	1	0		0		0		Carbamidomethyl [C47; C85]; Oxidation [M112]
FALSE	High	Master Protein	O08547	Sec22b	Vesicle-trafficking protein SEC22b [OS=Mus musculus]	0	67.199	48	10	23	10	215	24.7	8.51	58.99			10			0	High	High	1	0		0		0		Met-loss [N-Term]
FALSE	High	Master Protein	O08553	Dpysl2	Dihydropyrimidinase-related protein 2 [OS=Mus musculus]	0	479.501	67	36	254	32	572	62.2	6.38	612.29	38.74	20.05	30	5	4	0	High	High	1	0		2	Deamidated [Q196; N356]	3	Phospho [T514; T521; S522]	Deamidated [Q196; N356]; Oxidation [M64; M78; M83; M152; M362; M375; M437]; Carbamidomethyl [C132; C133; C248; C439; C504]; Phospho [T514; T521; S522]
FALSE	High	Master Protein	O08573	Lgals9	Isoform 2 of Galectin-9 [OS=Mus musculus]	0	86.705	45	13	38	13	322	36.5	8.69	74.79	1.93	3.42	12	1	1	0	High	High	1	0		1	Deamidated [N78]	0		Carbamidomethyl [C73; C101; C227; C279; C283; C294]; Deamidated [N78]; Oxidation [M209; M293]
FALSE	High	Master Protein	O08579	Emd	Emerin [OS=Mus musculus]	0	104.065	60	12	56	12	259	29.4	5.01	133.33	1.88		12	1		0	High	High	1	0		0		0
FALSE	High	Master Protein	O08582	Gtpbp1	GTP-binding protein 1 [OS=Mus musculus]	0	81.944	21	13	37	13	668	72.3	8.29	75.75			13			0	High	High	1	0		0		0		Carbamidomethyl [C515; C531]; Oxidation [M512]
FALSE	High	Master Protein	O08583	Alyref	THO complex subunit 4 [OS=Mus musculus]	0	67.322	37	6	19	6	255	26.9	11.15	60.9	5.27		6	1		0	High	High	1	0		0		0		Met-loss+Acetyl [N-Term]; Oxidation [P83; D89]
FALSE	High	Master Protein	O08585	Clta	clathrin light chain A [OS=Mus musculus]	0	15.593	17	4	8	3	235	25.6	4.58	6.02		8.65	3		1	0	High	High	1	0		0		0
FALSE	High	Master Protein	O08586	Pten	Phosphatidylinositol 3,4,5-trisphosphate 3-phosphatase and dual-specificity protein phosphatase PTEN [OS=Mus musculus]	0	4.921	4	2	4	2	403	47.1	6.37	4.39			2			0	High	High	1	0		0		0		Carbamidomethyl [C71]
FALSE	High	Master Protein	O08599	Stxbp1	Syntaxin-binding protein 1 [OS=Mus musculus]	0	74.379	30	15	39	15	594	67.5	6.96	59.64			15			0	High	High	1	0		0		0		Carbamidomethyl [C110; C354]
FALSE	High	Master Protein	O08600	Endog	endonuclease G, mitochondrial [OS=Mus musculus]	0	6.256	11	3	4	3	294	32.2	9.54	0			3			0	High	High	1	0		0		0
FALSE	High	Master Protein	O08648	Map3k4	Mitogen-activated protein kinase kinase kinase 4 [OS=Mus musculus]	0	4.648	1	2	2	2	1597	179.7	6.43	0			2			0	High	High	1	0		0		0		Carbamidomethyl [C1473]
FALSE	High	Master Protein	O08663	Metap2	methionine aminopeptidase 2 [OS=Mus musculus]	0	93.944	40	15	36	15	478	52.9	5.82	68.99	2.08		15	1		0	High	High	1	0		1	Deamidated [N329]	0		Carbamidomethyl [C121; C197; C263; C290; C380; C468]; Oxidation [M384]; Deamidated [N329]
FALSE	High	Master Protein	O08665	Sema3a	Semaphorin-3A [OS=Mus musculus]	0	9.28	5	3	5	2	772	88.8	7.42	4.18			3			0	High	High	1	0		0		0
FALSE	High	Master Protein	O08709	Prdx6	Peroxiredoxin-6 [OS=Mus musculus]	0	166.402	70	15	72	15	224	24.9	6.01	186.32	9.59		14	1		0	High	High	1	0		1	Deamidated [N90]	0		Deamidated [N90]; Oxidation [M188]; Carbamidomethyl [C201]; Met-loss [N-Term]
FALSE	High	Master Protein	O08715	Akap1	A-kinase anchor protein 1, mitochondrial [OS=Mus musculus]	0	33.043	11	7	15	7	857	92.1	5.02	19.1			7			0	High	High	1	0		0		0		Carbamidomethyl [C80; C352; C392]
FALSE	High	Master Protein	O08736	Casp12	Caspase-12 [OS=Mus musculus]	0	26.062	16	6	8	6	419	47.8	6.37	20.51			6			0	High	High	1	0		0		0		Carbamidomethyl [C298; C371]
FALSE	High	Master Protein	O08738	Casp6	Caspase-6 [OS=Mus musculus]	0	70.327	36	14	40	13	276	31.6	6.89	74.51			14			0	High	High	1	0		0		0		Carbamidomethyl [C70; C146; C246; C259]
FALSE	High	Master Protein	O08739	Ampd3	AMP deaminase 3 [OS=Mus musculus]	0	101.764	27	19	33	19	766	88.6	7.33	55.17			19			0	High	High	1	0		0		0		Carbamidomethyl [C690; C693]
FALSE	High	Master Protein	O08749	Dld	Dihydrolipoyl dehydrogenase, mitochondrial [OS=Mus musculus]	0	186.828	43	19	70	19	509	54.2	7.9	186.59	2.89	16.56	17	1	2	0	High	High	1	0		1	Deamidated [N151]	0		Oxidation [M100; M361]; Carbamidomethyl [C80; C85; C484]; Deamidated [N151]
FALSE	High	Master Protein	O08756	Hsd17b10	3-hydroxyacyl-CoA dehydrogenase type-2 [OS=Mus musculus]	0	80.97	31	8	30	8	261	27.4	8.41	90.69			8			0	High	High	1	0		0		0		Carbamidomethyl [C58]; Oxidation [M136]
FALSE	High	Master Protein	O08759	Ube3a	Ubiquitin-protein ligase E3A [OS=Mus musculus]	0	75.711	23	17	30	17	870	99.8	5.08	30.26			17			0	High	High	1	0		0		0		Carbamidomethyl [C42; C47; C52; C55; C838]
FALSE	High	Master Protein	O08784	Tcof1	Treacle protein [OS=Mus musculus]	0	62.484	13	12	23	12	1320	134.9	9.35	30.24	6.03		11	1		0	High	High	1	0		0		1	Phospho [S1216]	Phospho [S1216]
FALSE	High	Master Protein	O08788	Dctn1	Dynactin subunit 1 [OS=Mus musculus]	0	243.368	28	31	90	31	1281	141.6	5.9	210.7	4.83		31	1		0	High	High	1	0		1	Deamidated [Q95]	0		Carbamidomethyl [C81; C636; C791; C888; C893]; Deamidated [Q95]
FALSE	High	Master Protein	O08795	Prkcsh	Isoform 2 of Glucosidase 2 subunit beta [OS=Mus musculus]	0	170.522	46	21	76	21	528	59.5	4.48	184.19	5.49		19	2		0	High	High	1	0		3	Deamidated [Q346; Q364; Q467]	0		Carbamidomethyl [C70; C77; C97; C99; C100; C112; C116; C471; C500; C512]; Deamidated [Q346; Q364; Q467]; Oxidation [M463]
FALSE	High	Master Protein	O08796	Eef2k	Eukaryotic elongation factor 2 kinase [OS=Mus musculus]	0	26.538	11	7	11	7	724	81.7	5.38	11.61			7			0	High	High	1	0		0		0		Carbamidomethyl [C68]
FALSE	High	Master Protein	O08807	Prdx4	Peroxiredoxin-4 [OS=Mus musculus]	0	209.928	71	25	140	21	274	31	7.15	307.06	15.86	46.15	16	2	9	0	High	High	1	0		1	Deamidated [N98]	0		Carbamidomethyl [C54; C151; C248]; Deamidated [N98]
FALSE	High	Master Protein	O08808	Diaph1	Protein diaphanous homolog 1 [OS=Mus musculus]	0	9.141	3	3	5	3	1255	139.3	5.57	4.22			3			0	High	High	1	0		0		0
FALSE	High	Master Protein	O08810	Eftud2	116 kDa U5 small nuclear ribonucleoprotein component [OS=Mus musculus]	0	95.019	21	18	52	16	971	109.3	5	94.15			18			0	High	High	1	0		0		0		Carbamidomethyl [C143; C147; C779]
FALSE	High	Master Protein	O08848	RO60	60 kDa SS-A/Ro ribonucleoprotein [OS=Mus musculus]	0	23.047	8	4	9	4	538	60.1	7.9	18.08			4			0	High	High	1	0		0		0		Carbamidomethyl [C71; C141]
FALSE	High	Master Protein	O08856	Ell	RNA polymerase II elongation factor ELL [OS=Mus musculus]	0	8.871	4	2	2	2	602	67.1	9.19	2.83			2			0	Not Found	High	1	0		0		0
FALSE	High	Master Protein	O08908	Pik3r2	Phosphatidylinositol 3-kinase regulatory subunit beta [OS=Mus musculus]	0	4.998	3	2	4	1	722	81.2	6.07	0			2			0	High	High	1	0		0		0
FALSE	High	Master Protein	O08912	Galnt1	Polypeptide N-acetylgalactosaminyltransferase 1 [OS=Mus musculus]	0	16.643	11	5	8	5	559	64.2	7.71	9.73			5			0	High	High	1	0		0		0		Carbamidomethyl [C442; C459; C523]
FALSE	High	Master Protein	O08915	Aip	AH receptor-interacting protein [OS=Mus musculus]	0	76.482	48	14	39	14	330	37.6	6.4	77.8			14			0	High	High	1	0		0		0		Carbamidomethyl [C78; C90; C208]
FALSE	High	Master Protein	O08919	Numbl	Numb-like protein [OS=Mus musculus]	0	6.243	4	3	4	3	604	64.1	8.82	1.72			3			0	High	Not Found	1	0		0		0		Carbamidomethyl [C147; C161]
FALSE	High	Master Protein	O08992	Sdcbp	Syntenin-1 [OS=Mus musculus]	0	19.402	24	5	9	5	299	32.4	7.15	9.43		11.17	4		1	0	High	High	1	0		0		0		Met-loss+Acetyl [N-Term]; Carbamidomethyl [C240]
FALSE	High	Master Protein	O08997	Atox1	Copper transport protein ATOX1 [OS=Mus musculus]	0	40.37	63	4	11	4	68	7.3	6.51	21.25			4			0	High	High	1	0		0		0		Carbamidomethyl [C41]
FALSE	High	Master Protein	O08999	Ltbp2	Latent-transforming growth factor beta-binding protein 2 [OS=Mus musculus]	0	11.161	2	3	3	3	1813	195.7	5.29	4.86			3			0	High	Not Found	1	0		0		0		Carbamidomethyl [C670; C1587; C1628]
FALSE	High	Master Protein	O09005	Degs1	Sphingolipid delta(4)-desaturase DES1 [OS=Mus musculus]	0	33.983	16	4	8	4	323	38.2	7.77	25.19			4			0	High	High	1	0		0		0
FALSE	High	Master Protein	O09012	Pex5	Isoform 2 of Peroxisomal targeting signal 1 receptor [OS=Mus musculus]	0	57.627	24	10	17	10	602	66.8	4.55	27.01	0		9	1		0	High	High	1	0		2	Deamidated [N499; Q500]	0		Carbamidomethyl [C11; C360; C529]; Deamidated [N499; Q500]
FALSE	High	Master Protein	O09044	Snap23	Synaptosomal-associated protein 23 [OS=Mus musculus]	0	14.901	24	3	4	3	210	23.2	4.98	5.26			3			0	High	High	1	0		0		0
FALSE	High	Master Protein	O09061	Psmb1	proteasome subunit beta type-1 [OS=Mus musculus]	0	140.966	46	12	68	12	240	26.4	7.81	154.79			12			0	High	High	1	0		0		0		Oxidation [M171; M185]; Carbamidomethyl [C81; C88]
FALSE	High	Master Protein	O09106	Hdac1	histone deacetylase 1 [OS=Mus musculus]	0	76.132	29	10	31	7	482	55	5.48	74.34			10			0	High	High	1	0		0		0		Carbamidomethyl [C12; C261; C273; C284]
FALSE	High	Master Protein	O09111	Ndufb11	NADH dehydrogenase [ubiquinone] 1 beta subcomplex subunit 11, mitochondrial [OS=Mus musculus]	0	30.27	55	5	15	5	151	17.4	5.22	25.94			5			0	High	High	1	0		0		0
FALSE	High	Master Protein	O09117	Sypl1	Isoform 2 of Synaptophysin-like protein 1 [OS=Mus musculus]	0	36.67	20	4	11	4	243	26.7	7.72	22.34			4			0	High	High	1	0		0		0		Oxidation [M243]; Carbamidomethyl [C46]; Met-loss+Acetyl [N-Term]
FALSE	High	Master Protein	O09131	Gsto1	Glutathione S-transferase omega-1 [OS=Mus musculus]	0	78.557	50	16	53	16	240	27.5	7.36	96.6			16			0	High	High	1	0		0		0		Carbamidomethyl [C32; C191]
FALSE	High	Master Protein	O09159	Man2b1	Lysosomal alpha-mannosidase [OS=Mus musculus]	0	25.896	9	8	17	8	1013	114.6	8.13	18.37			8			0	High	High	1	0		0		0
FALSE	High	Master Protein	O09164	Sod3	Extracellular superoxide dismutase [Cu-Zn] [OS=Mus musculus]	0	45.1	34	7	23	7	251	27.4	6.84	28		10.99	5		2	0	High	High	1	0		0		0		Carbamidomethyl [C77; C221; C222]
FALSE	High	Master Protein	O09167	Rpl21	60S ribosomal protein L21 [OS=Mus musculus]	0	80.273	50	12	61	12	160	18.6	10.49	122.87	2.87		12	1		0	High	High	1	0		1	Deamidated [N144]	0		Oxidation [M31; M159]; Deamidated [N144]
FALSE	High	Master Protein	O09172	Gclm	Glutamate--cysteine ligase regulatory subunit [OS=Mus musculus]	0	57.105	39	8	27	8	274	30.5	5.52	63.94			8			0	High	High	1	0		0		0		Carbamidomethyl [C35; C46; C72]
FALSE	High	Master Protein	O09174	Amacr	alpha-methylacyl-CoA racemase [OS=Mus musculus]	0	36.649	23	8	16	8	381	41.7	7.4	25.97			8			0	High	High	1	0		0		0
FALSE	High	Master Protein	O35071	Kif1c	Kinesin-like protein KIF1C [OS=Mus musculus]	0	13.683	3	3	6	1	1100	122.4	7.03	12.23			3			0	Not Found	High	1	0		0		0
FALSE	High	Master Protein	O35074	Ptgis	prostacyclin synthase [OS=Mus musculus]	0	185.269	53	24	74	24	501	57	6.73	187.26			24			0	High	High	1	0		0		0		Carbamidomethyl [C232; C442]; Oxidation [M328; M433; M487]
FALSE	High	Master Protein	O35075	Vps26c	Down syndrome critical region protein 3 homolog [OS=Mus musculus]	0	40.932	28	5	6	5	297	32.9	7.68	15.92			5			0	High	High	1	0		0		0		Carbamidomethyl [C137; C187; C243]
FALSE	High	Master Protein	O35083	Agpat1	1-acyl-sn-glycerol-3-phosphate acyltransferase alpha [OS=Mus musculus]	0	9.363	8	2	4	2	285	31.7	9.14	9.04			2			0	High	High	1	0		0		0		Carbamidomethyl [C273]
FALSE	High	Master Protein	O35114	Scarb2	Lysosome membrane protein 2 [OS=Mus musculus]	0	22.251	12	5	14	5	478	54	5.1	25.36			5			0	High	High	1	0		0		0
FALSE	High	Master Protein	O35129	Phb2	Prohibitin-2 [OS=Mus musculus]	0	122.719	60	17	83	17	299	33.3	9.83	171.85			17			0	High	High	1	0		0		0		Met-loss+Acetyl [N-Term]; Oxidation [M120; M237]
FALSE	High	Master Protein	O35143	Atp5if1	ATPase inhibitor, mitochondrial [OS=Mus musculus]	0	21.684	24	7	14	7	106	12.2	9.64	8.55		23.98	2		5	0	High	High	1	0		0		0
FALSE	High	Master Protein	O35188	Cx3cl1	Fractalkine [OS=Mus musculus]	0	40.964	18	9	28	9	395	42.1	5.54	35.59			9			0	High	High	1	0		0		0		Carbamidomethyl [C32; C36; C58]
FALSE	High	Master Protein	O35215	Ddt	D-dopachrome decarboxylase [OS=Mus musculus]	0	67.802	90	8	30	8	118	13.1	6.54	82.35			8			0	High	High	1	0		0		0		Carbamidomethyl [C24; C57]; Met-loss [N-Term]
FALSE	High	Master Protein	O35226	Psmd4	26S proteasome non-ATPase regulatory subunit 4 [OS=Mus musculus]	0	78.511	31	10	34	10	376	40.7	4.79	89.46			10			0	High	High	1	0		0		0		Carbamidomethyl [C37; C87]
FALSE	High	Master Protein	O35239	Ptpn9	Tyrosine-protein phosphatase non-receptor type 9 [OS=Mus musculus]	0	31.985	16	8	15	8	593	67.9	8.1	31.32			8			0	High	High	1	0		0		0		Carbamidomethyl [C67; C230]
FALSE	High	Master Protein	O35245	Pkd2	polycystin-2 [OS=Mus musculus]	0	36.146	12	10	15	10	966	108.9	5.66	20.39			10			0	High	High	1	0		0		0		Carbamidomethyl [C162]
FALSE	High	Master Protein	O35280	Chek1	Serine/threonine-protein kinase Chk1 [OS=Mus musculus]	0	9.203	5	2	2	2	476	54.3	8.18	2.37			2			0	High	Not Found	1	0		0		0
FALSE	High	Master Protein	O35286	Dhx15	Pre-mRNA-splicing factor ATP-dependent RNA helicase DHX15 [OS=Mus musculus]	0	200.911	39	33	106	33	795	90.9	7.46	204.69			33			0	High	High	1	0		0		0		Oxidation [M236; M240; M246]; Carbamidomethyl [C174; C644; C750; C774]
FALSE	High	Master Protein	O35295	Purb	Transcriptional activator protein Pur-beta [OS=Mus musculus]	0	93.548	50	12	35	11	324	33.9	5.43	97.09			12			0	High	High	1	0		0		0		Carbamidomethyl [C250; C285]
FALSE	High	Master Protein	O35309	Nmi	N-myc-interactor [OS=Mus musculus]	0	39.748	25	7	9	7	314	35.2	5.05	16.72			7			0	High	Not Found	1	1	Acetyl [N-Term]	0		0		Carbamidomethyl [C12; C231; C239]; Acetyl [N-Term]
FALSE	High	Master Protein	O35316	Slc6a6	Sodium- and chloride-dependent taurine transporter [OS=Mus musculus]	0	23.658	8	5	14	5	621	69.8	7.23	16.95			5			0	High	High	1	0		0		0		Carbamidomethyl [C71]
FALSE	High	Master Protein	O35326	Srsf5	Serine/arginine-rich splicing factor 5 [OS=Mus musculus]	0	44.811	24	8	22	7	269	30.9	11.56	49.97			8			0	High	High	1	0		0		0		Carbamidomethyl [C63]
FALSE	High	Master Protein	O35343	Kpna4	Importin subunit alpha-3 [OS=Mus musculus]	0	105.084	24	10	35	5	521	57.9	4.94	87.7		2.67	9		1	0	High	High	1	0		0		0		Carbamidomethyl [C122; C174; C191; C228; C456]; Met-loss+Acetyl [N-Term]
FALSE	High	Master Protein	O35344	Kpna3	Importin subunit alpha-4 [OS=Mus musculus]	0	69.777	17	8	24	3	521	57.7	4.94	59.68		2.67	7		1	0	High	High	1	0		0		0		Carbamidomethyl [C174; C191; C228]; Met-loss+Acetyl [N-Term]
FALSE	High	Master Protein	O35345	Kpna6	Importin subunit alpha-7 [OS=Mus musculus]	0	58.413	22	10	24	4	536	59.9	4.94	40.75			10			0	High	High	1	1	Acetyl [N-Term]	0		0		Carbamidomethyl [C238; C357]; Acetyl [N-Term]
FALSE	High	Master Protein	O35350	Capn1	Calpain-1 catalytic subunit [OS=Mus musculus]	0	168.735	47	30	85	30	713	82.1	5.87	182.75			30			0	High	High	1	0		0		0		Carbamidomethyl [C49; C250; C351; C589]
FALSE	High	Master Protein	O35368	Ifi203	Interferon-activable protein 203 [OS=Mus musculus]	0	10.274	7	2	2	1	408	46.3	9.35	3.56			2			0	High	Not Found	1	0		0		0
FALSE	High	Master Protein	O35375	Nrp2	Neuropilin-2 [OS=Mus musculus]	0	36.11	16	12	18	12	931	104.6	5.24	19.37	6.26		10	2		0	High	High	1	0		2	Deamidated [Q47; N278]	0		Carbamidomethyl [C55; C277]; Deamidated [Q47; N278]
FALSE	High	Master Protein	O35379	Abcc1	Multidrug resistance-associated protein 1 [OS=Mus musculus]	0	138.854	23	28	60	28	1528	171.1	7.36	95.08	5.13		27	2		0	High	High	1	0		2	Deamidated [N426; N785]	0		Deamidated [N426; N785]; Carbamidomethyl [C208; C1436; C1505]
FALSE	High	Master Protein	O35381	Anp32a	Acidic leucine-rich nuclear phosphoprotein 32 family member A [OS=Mus musculus]	0	66.991	38	16	46	11	247	28.5	4.07	77.21			16			0	High	High	1	1	Acetyl [N-Term]	0		0		Carbamidomethyl [C27; C87; C123]; Acetyl [N-Term]
FALSE	High	Master Protein	O35382	Exoc4	Exocyst complex component 4 [OS=Mus musculus]	0	47.891	11	9	14	9	975	110.5	6.49	16.8			9			0	High	High	1	0		0		0		Carbamidomethyl [C620]
FALSE	High	Master Protein	O35387	Hax1	HCLS1-associated protein X-1 [OS=Mus musculus]	0	8.104	8	2	3	2	280	31.6	4.91	7.03			2			0	High	High	1	0		0		0
FALSE	High	Master Protein	O35405	Pld3	Phospholipase D3 [OS=Mus musculus]	0	21.311	11	5	11	5	488	54.4	6.52	25.16			5			0	High	High	1	0		0		0		Carbamidomethyl [C364]
FALSE	High	Master Protein	O35435	Dhodh	Dihydroorotate dehydrogenase (Quinone), mitochondrial [OS=Mus musculus]	0	31.66	15	6	12	6	395	42.7	9.55	23.55			6			0	High	High	1	0		0		0
FALSE	High	Master Protein	O35448	Ppt2	Lysosomal thioesterase PPT2 [OS=Mus musculus]	0	23.681	16	4	14	4	302	34.3	6.39	33.05			4			0	High	High	1	0		0		0		Carbamidomethyl [C109; C117]
FALSE	High	Master Protein	O35459	Ech1	Delta(3,5)-Delta(2,4)-dienoyl-CoA isomerase, mitochondrial [OS=Mus musculus]	0	23.999	17	7	15	7	327	36.1	7.71	20.78			7			0	High	High	1	0		0		0		Carbamidomethyl [C91; C186]
FALSE	High	Master Protein	O35465	Fkbp8	Isoform 2 of Peptidyl-prolyl cis-trans isomerase FKBP8 [OS=Mus musculus]	0	39.052	21	7	18	7	403	43.6	5.16	40.67			7			0	High	High	1	0		0		0		Met-loss+Acetyl [N-Term]; Carbamidomethyl [C168; C286]
FALSE	High	Master Protein	O35495	Cdk14	Cyclin-dependent kinase 14 [OS=Mus musculus]	0	37.08	22	9	16	8	469	53	8.92	30.86			9			0	High	High	1	0		0		0
FALSE	High	Master Protein	O35516	Notch2	Neurogenic locus notch homolog protein 2 [OS=Mus musculus]	0	112.032	10	18	41	18	2470	265.1	5.22	93.16			18			0	High	High	1	0		0		0		Carbamidomethyl [C179; C186; C360; C362; C666; C668; C828; C835; C840; C846; C1047; C1049; C1058; C1065; C1220; C1227; C1233; C1239; C1288; C1290; C1632; C1639]
FALSE	High	Master Protein	O35566	Cd151	CD151 antigen [OS=Mus musculus]	0	10.399	13	3	8	3	253	28.2	7.47	12.79			3			0	High	High	1	0		0		0
FALSE	High	Master Protein	O35593	Psmd14	26S proteasome non-ATPase regulatory subunit 14 [OS=Mus musculus]	0	81.131	36	9	33	9	310	34.6	6.52	64.91			9			0	High	High	1	0		0		0		Oxidation [M95; M168; M248; M265]; Carbamidomethyl [C238]
FALSE	High	Master Protein	O35598	Adam10	Disintegrin and metalloproteinase domain-containing protein 10 [OS=Mus musculus]	0	70.013	25	17	29	17	749	83.9	7.94	41.31			17			0	High	High	1	0		0		0		Carbamidomethyl [C173; C223; C436; C608; C633; C640]
FALSE	High	Master Protein	O35604	Npc1	Niemann-Pick C1 protein [OS=Mus musculus]	0	13.962	3	4	4	4	1277	142.8	5.71	6.86			4			0	High	High	1	0		0		0		Carbamidomethyl [C177]
FALSE	High	Master Protein	O35609	Scamp3	Secretory carrier-associated membrane protein 3 [OS=Mus musculus]	0	93.503	20	7	22	7	349	38.4	7.64	69.44			7			0	High	High	1	0		0		0
FALSE	High	Master Protein	O35621	Pmm1	Phosphomannomutase 1 [OS=Mus musculus]	0	9.312	10	2	4	1	262	29.8	5.47	8.14			2			0	High	Not Found	1	0		0		0
FALSE	High	Master Protein	O35638	Stag2	Cohesin subunit SA-2 [OS=Mus musculus]	0.001	3.862	1	2	3	2	1231	141.2	5.43	0			2			0	High	High	1	0		0		0
FALSE	High	Master Protein	O35639	Anxa3	annexin A3 [OS=Mus musculus]	0	299.318	73	36	140	35	323	36.4	5.76	345.09	2.42	14.91	34	1	2	0	High	High	1	0		1	Deamidated [Q304]	0		Carbamidomethyl [C202; C246]; Deamidated [Q304]; Met-loss+Acetyl [N-Term]
FALSE	High	Master Protein	O35640	Anxa8	Annexin A8 [OS=Mus musculus]	0	46.733	30	8	18	8	327	36.7	5.94	33.5			8			0	High	High	1	0		0		0		Carbamidomethyl [C161; C206]
FALSE	High	Master Protein	O35643	Ap1b1	AP-1 complex subunit beta-1 [OS=Mus musculus]	0	129.125	22	23	65	8	943	103.9	5.17	144.84			23			0	High	High	1	0		0		0		Carbamidomethyl [C95; C123; C129; C380; C391; C863]
FALSE	High	Master Protein	O35654	Pold2	DNA polymerase delta subunit 2 [OS=Mus musculus]	0	38.062	27	8	13	8	469	51.3	5.78	23.46			8			0	High	High	1	0		0		0		Carbamidomethyl [C384; C398; C404]
FALSE	High	Master Protein	O35658	C1qbp	Complement component 1 Q subcomponent-binding protein, mitochondrial [OS=Mus musculus]	0	71.114	28	6	28	6	278	31	4.92	55.48		7.08	5		1	0	High	High	1	0		0		0		Oxidation [M102]; Carbamidomethyl [C182]
FALSE	High	Master Protein	O35682	Myadm	myeloid-associated differentiation marker [OS=Mus musculus]	0	6.44	8	2	6	2	320	35.3	8.31	14.89			2			0	High	High	1	0		0		0		Carbamidomethyl [C286]
FALSE	High	Master Protein	O35685	Nudc	nuclear migration protein nudC [OS=Mus musculus]	0	91.959	44	18	79	18	332	38.3	5.26	116.17			18			0	High	High	1	0		0		0		Oxidation [M252; M300; M318; M324]
FALSE	High	Master Protein	O35704	Sptlc1	serine palmitoyltransferase 1 [OS=Mus musculus]	0	42.342	25	9	18	9	473	52.5	6.4	25.86			9			0	High	High	1	0		0		0		Carbamidomethyl [C133; C419]
FALSE	High	Master Protein	O35730	Ring1	E3 ubiquitin-protein ligase RING1 [OS=Mus musculus]	0	8.118	11	2	6	1	406	42.6	5.74	8.65	0		1	1		0	High	Not Found	1	0		1	Deamidated [Q311]	0		Deamidated [Q311]
FALSE	High	Master Protein	O35737	Hnrnph1	Heterogeneous nuclear ribonucleoprotein H [OS=Mus musculus]	0	132.956	37	13	74	4	449	49.2	6.3	155.56			13			0	High	High	1	0		0		0		Carbamidomethyl [C22; C34; C122; C267; C290]; Oxidation [M271]
FALSE	High	Master Protein	O35841	Api5	Apoptosis inhibitor 5 [OS=Mus musculus]	0	117.122	41	21	75	21	504	56.8	5.92	144.94			21			0	High	High	1	0		0		0		Carbamidomethyl [C234; C297]; Met-loss [N-Term]
FALSE	High	Master Protein	O35855	Bcat2	Branched-chain-amino-acid aminotransferase, mitochondrial [OS=Mus musculus]	0	62.44	29	10	24	10	393	44.1	8.29	60.57			10			0	High	High	1	0		0		0		Carbamidomethyl [C229; C343; C346]
FALSE	High	Master Protein	O35857	Timm44	Mitochondrial import inner membrane translocase subunit TIM44 [OS=Mus musculus]	0	94.87	35	16	33	16	452	51.1	8.13	71.05			16			0	High	High	1	0		0		0		Carbamidomethyl [C343]; Oxidation [M379]
FALSE	High	Master Protein	O35864	Cops5	COP9 signalosome complex subunit 5 [OS=Mus musculus]	0	82.256	39	13	32	13	334	37.5	6.54	63.46			13			0	High	High	1	0		0		0		Met-loss+Acetyl [N-Term]
FALSE	High	Master Protein	O35874	Slc1a4	neutral amino acid transporter A [OS=Mus musculus]	0	27.09	11	3	7	3	532	56	5.87	15.08			3			0	High	High	1	0		0		0
FALSE	High	Master Protein	O35887	Calu	Calumenin [OS=Mus musculus]	0	345.511	66	29	163	29	315	37	4.67	469.54	13.59	14.6	27	2	2	0	High	High	1	0		1	Deamidated [Q301]	1	Phospho [Y47]	Oxidation [M162; M188; M249]; Deamidated [Q301]; Phospho [Y47]
FALSE	High	Master Protein	O35900	Lsm2	U6 snRNA-associated Sm-like protein LSm2 [OS=Mus musculus]	0	7.774	28	2	3	2	95	10.8	6.52	1.93			2			0	High	High	1	0		0		0
FALSE	High	Master Protein	O35954	Pitpnm1	Membrane-associated phosphatidylinositol transfer protein 1 [OS=Mus musculus]	0	40.974	10	10	15	10	1243	134.9	6.06	26.12	2.29		10	1		0	High	High	1	0		1	Deamidated [Q884]	0		Carbamidomethyl [C259; C888]; Deamidated [Q884]
FALSE	High	Master Protein	O35955	Psmb10	Proteasome subunit beta type-10 [OS=Mus musculus]	0	16.188	18	4	5	4	273	29	6.87	8.78			4			0	High	High	1	0		0		0
FALSE	High	Master Protein	O35963	Rab33b	Ras-related protein Rab-33B [OS=Mus musculus]	0	34.37	30	6	19	4	229	25.8	7.69	42.18			6			0	High	High	1	0		0		0
FALSE	High	Master Protein	O35969	Gamt	guanidinoacetate N-methyltransferase [OS=Mus musculus]	0	24.342	28	4	6	4	236	26.3	5.71	8.51			4			0	High	High	1	0		0		0		Carbamidomethyl [C91]
FALSE	High	Master Protein	O35988	Sdc4	syndecan-4 [OS=Mus musculus]	0	22.043	31	5	10	5	198	21.5	4.41	15.33		2.93	4		1	0	High	High	1	0		0		0
FALSE	High	Master Protein	O54692	Zw10	Centromere/kinetochore protein zw10 homolog [OS=Mus musculus]	0	32.348	12	8	11	8	779	88	5.92	14.71			8			0	High	High	1	0		0		0		Carbamidomethyl [C144; C346]
FALSE	High	Master Protein	O54724	Cavin1	caveolae-associated protein 1 [OS=Mus musculus]	0	168.591	44	18	63	18	392	43.9	5.52	178.99			18			0	High	High	1	1	Acetyl [N-Term]	0		0		Acetyl [N-Term]; Oxidation [M84; M156]
FALSE	High	Master Protein	O54734	Ddost	Dolichyl-diphosphooligosaccharide--protein glycosyltransferase 48 kDa subunit [OS=Mus musculus]	0	90.824	41	14	71	14	441	49	5.83	126.35			14			0	High	High	1	0		0		0		Carbamidomethyl [C130]
FALSE	High	Master Protein	O54774	Ap3d1	AP-3 complex subunit delta-1 [OS=Mus musculus]	0	117.453	25	24	47	24	1199	135	7.37	72.82			24			0	High	High	1	0		0		0		Carbamidomethyl [C348; C574; C1090; C1099; C1149; C1163]
FALSE	High	Master Protein	O54781	Srpk2	SRSF protein kinase 2 [OS=Mus musculus]	0	29.725	12	6	14	4	681	76.7	4.91	27.2			6			0	High	High	1	0		0		0		Carbamidomethyl [C528]
FALSE	High	Master Protein	O54782	Man2b2	Epididymis-specific alpha-mannosidase [OS=Mus musculus]	0	8.893	3	2	4	2	1018	115.5	7.39	7.17			2			0	High	High	1	0		0		0		Carbamidomethyl [C707]
FALSE	High	Master Protein	O54784	Dapk3	Death-associated protein kinase 3 [OS=Mus musculus]	0	32.905	16	6	13	6	448	51.4	8.7	25.83			6			0	High	High	1	0		0		0
FALSE	High	Master Protein	O54785	Limk2	LIM domain kinase 2 [OS=Mus musculus]	0	7.209	5	3	5	3	638	72.2	7.5	0			3			0	High	High	1	0		0		0		Carbamidomethyl [C37]
FALSE	High	Master Protein	O54825	Bysl	Bystin [OS=Mus musculus]	0	39.35	25	9	12	9	436	49.8	7.78	15.49			9			0	High	High	1	0		0		0		Carbamidomethyl [C314]
FALSE	High	Master Protein	O54833	Csnk2a2	casein kinase II subunit alpha' [OS=Mus musculus]	0	104.779	56	14	38	13	350	41.2	8.56	80.77			14			0	High	High	1	0		0		0		Carbamidomethyl [C336]
FALSE	High	Master Protein	O54879	Hmgb3	High mobility group protein B3 [OS=Mus musculus]	0	47.393	48	10	15	9	200	23	8.37	14.96			10			0	High	High	1	0		0		0
FALSE	High	Master Protein	O54931	Akap2	A-kinase anchor protein 2 [OS=Mus musculus]	0	121.025	19	14	29	14	893	98.5	5.21	73.23	3.19	7.25	13	1	1	0	High	High	1	0		1	Deamidated [Q421]	0		Carbamidomethyl [C416]; Deamidated [Q421]
FALSE	High	Master Protein	O54940	Bnip2	BCL2/adenovirus E1B 19 kDa protein-interacting protein 2 [OS=Mus musculus]	0	14.468	10	3	3	2	326	37.7	4.97	2.97			3			0	High	High	1	0		0		0
FALSE	High	Master Protein	O54941	Smarce1	SWI/SNF-related matrix-associated actin-dependent regulator of chromatin subfamily E member 1 [OS=Mus musculus]	0	13.146	7	2	5	2	411	46.6	4.88	15.36			2			0	High	High	1	0		0		0
FALSE	High	Master Protein	O54946	Dnajb6	DnaJ homolog subfamily B member 6 [OS=Mus musculus]	0	40.22	22	7	18	7	365	39.8	9.36	36.4			7			0	High	High	1	0		0		0		Met-loss [N-Term]
FALSE	High	Master Protein	O54950	Prkag1	5'-AMP-activated protein kinase subunit gamma-1 [OS=Mus musculus]	0	71.952	42	13	27	13	330	37.5	7.14	55.94			13			0	High	High	1	0		0		0		Carbamidomethyl [C37; C278]
FALSE	High	Master Protein	O54962	Banf1	Barrier-to-autointegration factor [OS=Mus musculus]	0	11.778	47	3	6	3	89	10.1	6.09	4.61			3			0	High	High	1	0		0		0		Carbamidomethyl [C77; C80]
FALSE	High	Master Protein	O54984	Get3	ATPase ASNA1 [OS=Mus musculus]	0	49.049	39	9	17	9	348	38.8	4.91	41.55	3.31		8	1		0	High	High	1	0		1	Deamidated [N159]	0		Carbamidomethyl [C268; C289]; Deamidated [N159]
FALSE	High	Master Protein	O54988	Slk	STE20-like serine/threonine-protein kinase [OS=Mus musculus]	0	131.282	21	19	44	19	1233	141.4	5.14	94.83	3.13		18	1		0	High	High	1	0		1	Deamidated [N329]	0		Deamidated [N329]; Met-loss+Acetyl [N-Term]; Carbamidomethyl [C1210]
FALSE	High	Master Protein	O54998	Fkbp7	Peptidyl-prolyl cis-trans isomerase FKBP7 [OS=Mus musculus]	0	76.837	48	11	38	11	218	24.9	6.04	72.78			11			0	High	High	1	0		0		0		Carbamidomethyl [C100]
FALSE	High	Master Protein	O55003	Bnip3	BCL2/adenovirus E1B 19 kDa protein-interacting protein 3 [OS=Mus musculus]	0	7.675	14	3	3	3	187	21	7.14	1.75			3			0	High	High	1	0		0		0
FALSE	High	Master Protein	O55013	Trappc3	Trafficking protein particle complex subunit 3 [OS=Mus musculus]	0.001	3.926	11	2	3	2	180	20.3	4.96	4.28			2			0	High	High	1	0		0		0
FALSE	High	Master Protein	O55022	Pgrmc1	Membrane-associated progesterone receptor component 1 [OS=Mus musculus]	0	67.078	62	10	38	9	195	21.7	4.7	70.04	10.59		10	1		0	High	High	1	0		0		1	Phospho [S181]	Phospho [S181]; Carbamidomethyl [C129]; Oxidation [M91]
FALSE	High	Master Protein	O55023	Impa1	Inositol monophosphatase 1 [OS=Mus musculus]	0	75.435	40	13	48	13	277	30.4	5.19	78.16			13			0	High	High	1	0		0		0		Carbamidomethyl [C64; C183]; Oxidation [M53]
FALSE	High	Master Protein	O55029	Copb2	Coatomer subunit beta' [OS=Mus musculus]	0	298.189	48	36	150	36	905	102.4	5.3	329.82	16.65		36	2		0	High	High	1	0		3	Deamidated [N363; Q850; Q851]	0		Carbamidomethyl [C56; C104; C190; C276; C351]; Deamidated [N363; Q850; Q851]; Oxidation [M79; M94; M271; M306; M308; M348]
FALSE	High	Master Protein	O55033	Nck2	Cytoplasmic protein NCK2 [OS=Mus musculus]	0	17.224	16	6	14	4	380	42.9	6.95	4.56			6			0	High	High	1	0		0		0		Carbamidomethyl [C144; C343]
FALSE	High	Master Protein	O55047	Tlk2	Serine/threonine-protein kinase tousled-like 2 [OS=Mus musculus]	0	22.609	11	6	10	4	718	82.2	8.27	11.59			6			0	High	High	1	0		0		0
FALSE	High	Master Protein	O55057	Pde6d	Retinal rod rhodopsin-sensitive cGMP 3',5'-cyclic phosphodiesterase subunit delta [OS=Mus musculus]	0	18.772	33	4	7	4	150	17.3	5.67	17.27			4			0	High	High	1	0		0		0
FALSE	High	Master Protein	O55060	Tpmt	Thiopurine S-methyltransferase [OS=Mus musculus]	0	8.483	11	3	5	3	240	27.6	6.44	3.66			3			0	High	High	1	0		0		0		Carbamidomethyl [C65]
FALSE	High	Master Protein	O55091	Impact	protein IMPACT [OS=Mus musculus]	0	73.43	49	11	25	11	318	36.3	5.05	66.22			11			0	High	High	1	0		0		0		Carbamidomethyl [C194; C225; C235]; Met-loss+Acetyl [N-Term]
FALSE	High	Master Protein	O55098	Stk10	Serine/threonine-protein kinase 10 [OS=Mus musculus]	0	6.924	3	2	2	2	966	111.8	7.15	0			2			0	High	High	1	0		0		0		Carbamidomethyl [C138]
FALSE	High	Master Protein	O55106	Strn	striatin [OS=Mus musculus]	0	67.713	24	12	21	12	780	85.9	5.27	48.18			12			0	High	High	1	0		0		0		Carbamidomethyl [C316; C740; C765]
FALSE	High	Master Protein	O55126	Nipsnap2	Protein NipSnap homolog 2 [OS=Mus musculus]	0	24.054	20	6	15	6	281	32.9	9.26	14.5			6			0	High	High	1	0		0		0		Carbamidomethyl [C80; C88]
FALSE	High	Master Protein	O55131	Septin7	Septin-7 [OS=Mus musculus]	0	289.979	59	29	111	28	436	50.5	8.57	265.9	14.28	0	28	2	1	0	High	High	1	0		1	Deamidated [N319]	0		Carbamidomethyl [C17; C159; C160; C203; C279]; Deamidated [N319]; Oxidation [M338]
FALSE	High	Master Protein	O55135	Eif6	eukaryotic translation initiation factor 6 [OS=Mus musculus]	0	92.714	47	8	39	8	245	26.5	4.74	126.77			8			0	High	High	1	0		0		0		Carbamidomethyl [C11; C15; C110; C152]; Oxidation [M236]
FALSE	High	Master Protein	O55142	Rpl35a	60S ribosomal protein L35a [OS=Mus musculus]	0	36.739	45	9	82	9	110	12.5	10.89	81.25			9			0	High	High	1	0		0		0		Carbamidomethyl [C47]
FALSE	High	Master Protein	O55143	Atp2a2	Sarcoplasmic/endoplasmic reticulum calcium ATPase 2 [OS=Mus musculus]	0	385.233	39	44	188	44	1044	114.8	5.34	422.94			44			0	High	High	1	1	Acetyl [N-Term]	0		0		Carbamidomethyl [C344; C349; C364; C404; C417; C420; C447; C471; C498; C560; C635; C875; C998]; Oxidation [M207; M239; M361; M452; M494; M536; M575; M719]; Acetyl [N-Term]
FALSE	High	Master Protein	O55176	Pja1	E3 ubiquitin-protein ligase Praja-1 [OS=Mus musculus]	0	15.299	11	4	7	4	578	63.9	4.97	10.47	2.11		3	1		0	High	High	1	0		1	Deamidated [Q338]	0		Carbamidomethyl [C195]; Deamidated [Q338]
FALSE	High	Master Protein	O55201	Supt5h	Transcription elongation factor Spt5 [OS=Mus musculus]	0	158.173	32	26	46	26	1082	120.6	5.05	106.44	2.89		25	1		0	High	High	1	0		1	Deamidated [Q165]	0		Oxidation [M755]; Deamidated [Q165]; Carbamidomethyl [C734; C1006]
FALSE	High	Master Protein	O55222	Ilk	Integrin-linked protein kinase [OS=Mus musculus]	0	134.662	56	25	80	25	452	51.3	8.07	109.79		2.79	24		1	0	High	High	1	1	Acetyl [N-Term]	0		0		Carbamidomethyl [C8; C42; C239; C257; C346; C422; C428]; Oxidation [M135; M301; M350]; Acetyl [N-Term]
FALSE	High	Master Protein	O55229	Chkb	Choline/ethanolamine kinase [OS=Mus musculus]	0	4.563	6	2	3	2	394	45.1	5.41	0			2			0	High	High	1	0		0		0
FALSE	High	Master Protein	O55234	Psmb5	proteasome subunit beta type-5 [OS=Mus musculus]	0	140.541	56	17	74	17	264	28.5	7.02	166.49		3.1	16		1	0	High	High	1	0		0		0		Carbamidomethyl [C111; C161]; Oxidation [M145; M152]
FALSE	High	Master Protein	O55236	Rngtt	mRNA-capping enzyme [OS=Mus musculus]	0	25.77	13	6	10	6	597	68.6	8.16	14.27			6			0	High	High	1	0		0		0		Carbamidomethyl [C97; C375]
FALSE	High	Master Protein	O55239	Nnmt	Nicotinamide N-methyltransferase [OS=Mus musculus]	0	20.285	21	6	17	6	264	29.6	5.39	20.6			6			0	High	High	1	0		0		0		Carbamidomethyl [C32; C50]
FALSE	High	Master Protein	O55242	Sigmar1	sigma non-opioid intracellular receptor 1 [OS=Mus musculus]	0	25.909	30	4	10	4	223	25.2	5.91	24.31			4			0	High	High	1	0		0		0
FALSE	High	Master Protein	O70133	Dhx9	Atp-dependent rna helicase a [OS=Mus musculus]	0	32.898	5	7	11	7	1380	149.4	6.83	15.9			7			0	High	High	1	0		0		0		Carbamidomethyl [C440]
FALSE	High	Master Protein	O70152	Dpm1	Dolichol-phosphate mannosyltransferase subunit 1 [OS=Mus musculus]	0	36.132	42	9	22	9	260	29.2	9.51	38.65		2.28	8		1	0	High	High	1	0		0		0
FALSE	High	Master Protein	O70194	Eif3d	Eukaryotic translation initiation factor 3 subunit D [OS=Mus musculus]	0	268.568	56	29	114	29	548	63.9	6.05	251.57	8.89	4.61	27	1	1	0	High	High	1	0		1	Deamidated [N385]	0		Carbamidomethyl [C19; C195; C196; C327; C375; C404; C437; C438; C493; C498]; Deamidated [N385]; Oxidation [M5; M174; M180; M314; M348]
FALSE	High	Master Protein	O70251	Eef1b	Elongation factor 1-beta [OS=Mus musculus]	0	121.099	57	11	58	9	225	24.7	4.69	148.72			11			0	High	High	1	0		0		0		Carbamidomethyl [C50; C161; C191]; Oxidation [M155]
FALSE	High	Master Protein	O70252	Hmox2	Heme oxygenase 2 [OS=Mus musculus]	0	90.114	42	10	19	10	315	35.7	5.87	66.96			10			0	High	High	1	0		0		0		Carbamidomethyl [C264; C281]
FALSE	High	Master Protein	O70274	Ptp4a2	Protein tyrosine phosphatase type IVA 2 [OS=Mus musculus]	0	24.425	31	5	8	5	167	19.1	8.37	16.18			5			0	High	High	1	0		0		0		Carbamidomethyl [C46]
FALSE	High	Master Protein	O70293	Grk6	G protein-coupled receptor kinase 6 [OS=Mus musculus]	0	15.724	7	3	4	3	576	65.9	8.1	8.79			3			0	High	High	1	0		0		0		Carbamidomethyl [C201; C203]
FALSE	High	Master Protein	O70305	Atxn2	Ataxin-2 [OS=Mus musculus]	0	100.587	15	14	32	14	1285	136.4	9.55	66.93			14			0	High	High	1	0		0		0		Carbamidomethyl [C271; C863]
FALSE	High	Master Protein	O70309	Itgb5	Integrin beta-5 [OS=Mus musculus]	0	66.163	20	12	24	12	798	87.9	6.16	59.65			12			0	High	High	1	0		0		0		Carbamidomethyl [C75; C202; C259; C498; C500; C513; C548; C550; C555]
FALSE	High	Master Protein	O70310	Nmt1	glycylpeptide N-tetradecanoyltransferase 1 [OS=Mus musculus]	0	146.371	41	18	66	15	496	56.9	8	159.4			18			0	High	High	1	0		0		0		Oxidation [M71; M81]; Carbamidomethyl [C249]; Met-loss+Acetyl [N-Term]
FALSE	High	Master Protein	O70311	Nmt2	Glycylpeptide N-tetradecanoyltransferase 2 [OS=Mus musculus]	0	74.503	27	11	26	8	529	60.4	7.8	54.36			11			0	High	High	1	0		0		0		Carbamidomethyl [C135; C282]
FALSE	High	Master Protein	O70318	Epb41l2	band 4.1-like protein 2 [OS=Mus musculus]	0	292.444	50	44	135	37	988	109.9	5.43	236.32	2.86	6.91	41	1	2	0	High	High	1	0		1	Deamidated [Q382]	0		Carbamidomethyl [C225; C241; C321; C481; C756]; Deamidated [Q382]; Oxidation [M396; M860]; Met-loss+Acetyl [N-Term]
FALSE	High	Master Protein	O70325	Gpx4	Phospholipid hydroperoxide glutathione peroxidase, mitochondrial [OS=Mus musculus]	0	54.004	47	9	25	9	197	22.2	8.46	40.28			9			0	High	High	1	0		0		0		Carbamidomethyl [C55; C93; C102; C134]
FALSE	High	Master Protein	O70326	Grem1	Gremlin-1 [OS=Mus musculus]	0	17.365	24	3	4	2	184	20.7	9.39	8.8			3			0	High	Not Found	1	0		0		0		Carbamidomethyl [C108; C118; C122; C141; C144]
FALSE	High	Master Protein	O70333	Cript	cysteine-rich PDZ-binding protein [OS=Mus musculus]	0	4.62	25	2	3	2	101	11.3	9.57	1.93			2			0	High	High	1	0		0		0		Carbamidomethyl [C73; C76]
FALSE	High	Master Protein	O70378	Emc8	ER membrane protein complex subunit 8 [OS=Mus musculus]	0	42.909	49	7	20	7	207	23.3	6.15	47.42			7			0	High	High	1	0		0		0		Carbamidomethyl [C12; C24; C133; C150; C158]
FALSE	High	Master Protein	O70400	Pdlim1	PDZ and LIM domain protein 1 [OS=Mus musculus]	0	223.439	74	22	120	22	327	35.8	6.84	320.84	4.29		22	2		0	High	High	1	0		2	Deamidated [Q111; N159]	0		Carbamidomethyl [C73; C258; C261; C281; C284; C287; C305]; Oxidation [M77; M104; M125]; Deamidated [Q111; N159]; Met-loss+Acetyl [N-Term]
FALSE	High	Master Protein	O70401	Tspan6	Tetraspanin-6 [OS=Mus musculus]	0	12.655	13	3	9	3	245	27.3	7.74	17.69			3			0	High	High	1	0		0		0		Carbamidomethyl [C183; C197]
FALSE	High	Master Protein	O70404	Vamp8	vesicle-associated membrane protein 8 [OS=Mus musculus]	0	29.846	47	5	13	5	101	11.4	8.19	36.63			5			0	High	High	1	1	Acetyl [N-Term]	0		0		Acetyl [N-Term]
FALSE	High	Master Protein	O70421	Fzd1	frizzled-1 [OS=Mus musculus]	0	5.379	3	2	3	1	642	71.1	7.71	0			2			0	High	Not Found	1	0		0		0		Carbamidomethyl [C193]
FALSE	High	Master Protein	O70433	Fhl2	Four and a half LIM domains protein 2 [OS=Mus musculus]	0	178.752	81	23	98	23	279	32.1	7.3	205.53			23			0	High	High	1	0		0		0		Carbamidomethyl [C7; C10; C28; C31; C40; C43; C49; C51; C65; C68; C71; C89; C92; C126; C129; C150; C153; C162; C165; C185; C188; C191; C209; C212; C214; C221; C224; C248; C251; C254; C272; C275]
FALSE	High	Master Protein	O70435	Psma3	Proteasome subunit alpha type-3 [OS=Mus musculus]	0	99.865	48	12	74	12	255	28.4	5.44	121.89			12			0	High	High	1	0		0		0		Carbamidomethyl [C42]; Oxidation [M28; M76]; Met-loss+Acetyl [N-Term]
FALSE	High	Master Protein	O70439	Stx7	Syntaxin-7 [OS=Mus musculus]	0	12.507	14	3	4	3	261	29.8	5.78	8.25			3			0	High	High	1	0		0		0		Carbamidomethyl [C28]; Met-loss+Acetyl [N-Term]
FALSE	High	Master Protein	O70458	Osmr	Oncostatin-M-specific receptor subunit beta [OS=Mus musculus]	0	36.944	12	9	12	9	971	110.2	6.6	17.11		2.62	8		1	0	High	High	1	0		0		0		Carbamidomethyl [C214; C567; C684]
FALSE	High	Master Protein	O70472	Tmem131	Transmembrane protein 131 [OS=Mus musculus]	0.002	3.206	2	2	2	2	1877	204.5	8.54	2.14			2			0	Not Found	High	1	0		0		0
FALSE	High	Master Protein	O70475	Ugdh	UDP-glucose 6-dehydrogenase [OS=Mus musculus]	0	270.506	66	30	126	30	493	54.8	7.56	284.81		0	29		1	0	High	High	1	0		0		0		Carbamidomethyl [C8; C9; C20; C27; C64; C112; C196; C276]; Oxidation [M26; M306; M432]
FALSE	High	Master Protein	O70480	Vamp4	Vesicle-associated membrane protein 4 [OS=Mus musculus]	0	20.823	22	2	4	2	141	16.3	7.36	16.2			2			0	High	High	1	0		0		0
FALSE	High	Master Protein	O70481	Ubr1	E3 ubiquitin-protein ligase UBR1 [OS=Mus musculus]	0	10.579	3	4	6	4	1757	200.1	6.05	0			4			0	High	High	1	0		0		0		Carbamidomethyl [C163]
FALSE	High	Master Protein	O70492	Snx3	sorting nexin-3 [OS=Mus musculus]	0	42.174	48	10	33	8	162	18.7	8.66	69.9			10			0	High	High	1	0		0		0		Carbamidomethyl [C140]; Met-loss+Acetyl [N-Term]
FALSE	High	Master Protein	O70493	Snx12	Sorting nexin-12 [OS=Mus musculus]	0	40.189	42	10	31	8	165	19.1	7.34	43.75			10			0	High	High	1	0		0		0		Carbamidomethyl [C140]; Met-loss+Acetyl [N-Term]
FALSE	High	Master Protein	O70503	Hsd17b12	Very-long-chain 3-oxoacyl-CoA reductase [OS=Mus musculus]	0	165.756	59	20	86	20	312	34.7	9.52	152.76		2.49	19		1	0	High	High	1	0		0		0		Carbamidomethyl [C38; C166; C215]; Oxidation [M176; M295]
FALSE	High	Master Protein	O70551	Srpk1	SRSF protein kinase 1 [OS=Mus musculus]	0	105.504	34	20	41	18	648	73	6.19	66.57	5.8	2.3	18	2	1	0	High	High	1	0		2	Deamidated [Q256; N357]	0		Carbamidomethyl [C188; C356; C386; C495]; Deamidated [Q256; N357]
FALSE	High	Master Protein	O70572	Smpd2	Sphingomyelin phosphodiesterase 2 [OS=Mus musculus]	0	34.653	22	8	16	8	419	47.4	6.44	27.13			8			0	High	High	1	0		0		0		Carbamidomethyl [C188; C189; C251; C252; C411]
FALSE	High	Master Protein	O70579	Slc25a17	peroxisomal membrane protein PMP34 [OS=Mus musculus]	0	20.282	16	4	6	4	307	34.4	10.11	16.12			4			0	High	High	1	0		0		0
FALSE	High	Master Protein	O70583	Mid1	E3 ubiquitin-protein ligase Midline-1 [OS=Mus musculus]	0	22.887	11	7	11	7	680	76.1	6.93	15.9	3.73		6	1		0	High	High	1	0		1	Deamidated [Q315]	0		Carbamidomethyl [C591]; Deamidated [Q315]
FALSE	High	Master Protein	O70589	Cask	peripheral plasma membrane protein CASK [OS=Mus musculus]	0	51.658	16	12	22	12	926	105	6.43	31.88			12			0	High	High	1	0		0		0		Carbamidomethyl [C418; C633; C698]
FALSE	High	Master Protein	O70591	Pfdn2	Prefoldin subunit 2 [OS=Mus musculus]	0	41.269	45	6	20	6	154	16.5	6.58	39.57			6			0	High	High	1	0		0		0
FALSE	High	Master Protein	O88207	Col5a1	Collagen alpha-1(V) chain [OS=Mus musculus]	0	84.867	9	13	25	13	1838	183.6	4.98	52.74			13			0	High	High	1	0		0		0		Carbamidomethyl [C62; C1645; C1662]; Oxidation [M538]
FALSE	High	Master Protein	O88271	Cfdp1	Craniofacial development protein 1 [OS=Mus musculus]	0	53.909	24	6	17	6	295	32.9	4.86	63.82			6			0	High	High	1	0		0		0
FALSE	High	Master Protein	O88273	Grem2	Gremlin-2 [OS=Mus musculus]	0	12.349	15	2	3	1	168	19.3	9.17	6.38			2			0	High	Not Found	1	0		0		0		Carbamidomethyl [C97; C101; C157]
FALSE	High	Master Protein	O88342	Wdr1	WD repeat-containing protein 1 [OS=Mus musculus]	0	420.109	71	43	276	43	606	66.4	6.6	525.65	11.75	28.86	36	1	6	0	High	High	1	0		1	Deamidated [N331]	0		Carbamidomethyl [C170; C194; C225; C325; C382; C438; C507]; Oxidation [M371]; Deamidated [N331]
FALSE	High	Master Protein	O88351	Ikbkb	Inhibitor of nuclear factor kappa-B kinase subunit beta [OS=Mus musculus]	0	5.955	3	2	3	1	757	86.6	6.4	3.75			2			0	Not Found	High	1	0		0		0		Carbamidomethyl [C114; C115]
FALSE	High	Master Protein	O88393	Tgfbr3	Transforming growth factor beta receptor type 3 [OS=Mus musculus]	0	24.625	6	4	11	4	850	93.8	6	30.6			4			0	High	High	1	0		0		0		Carbamidomethyl [C223; C659]
FALSE	High	Master Protein	O88413	Tulp3	Tubby-related protein 3 [OS=Mus musculus]	0	47.699	26	8	14	8	460	51.2	6.24	19.86			8			0	High	High	1	0		0		0
FALSE	High	Master Protein	O88428	Papss2	bifunctional 3'-phosphoadenosine 5'-phosphosulfate synthase 2 [OS=Mus musculus]	0	16.08	6	3	6	2	621	70.3	7.58	17.03			3			0	High	Not Found	1	0		0		0		Carbamidomethyl [C44]
FALSE	High	Master Protein	O88441	Mtx2	Metaxin-2 [OS=Mus musculus]	0	15.758	16	4	7	4	263	29.7	5.63	5.81			4			0	High	High	1	0		0		0		Carbamidomethyl [C246]
FALSE	High	Master Protein	O88447	Klc1	Kinesin light chain 1 [OS=Mus musculus]	0	80.047	28	16	35	12	541	61.4	5.68	62.11			16			0	High	High	1	0		0		0		Carbamidomethyl [C347; C389; C455]
FALSE	High	Master Protein	O88448	Klc2	Kinesin light chain 2 [OS=Mus musculus]	0	17.423	9	6	8	2	599	66.6	7.21	8.75			6			0	High	Not Found	1	0		0		0		Carbamidomethyl [C220; C374; C472]
FALSE	High	Master Protein	O88455	Dhcr7	7-dehydrocholesterol reductase [OS=Mus musculus]	0	34.733	15	6	23	6	471	53.9	8.35	38.07			6			0	High	High	1	0		0		0		Carbamidomethyl [C205; C364; C376]
FALSE	High	Master Protein	O88456	Capns1	Calpain small subunit 1 [OS=Mus musculus]	0	58.055	33	8	43	8	269	28.4	5.63	73.48	4.1		8	1		0	High	High	1	0		1	Deamidated [Q76]	0		Oxidation [M148; M152; M240]; Deamidated [Q76]; Carbamidomethyl [C145]
FALSE	High	Master Protein	O88477	Igf2bp1	Insulin-like growth factor 2 mRNA-binding protein 1 [OS=Mus musculus]	0	117.322	41	20	62	19	577	63.4	9.2	116.18	8.42		19	2		0	High	High	1	0		2	Deamidated [Q158; Q161]	1	Phospho [S181]	Carbamidomethyl [C44; C253; C257]; Phospho [S181]; Deamidated [Q158; Q161]
FALSE	High	Master Protein	O88487	Dync1i2	cytoplasmic dynein 1 intermediate chain 2 [OS=Mus musculus]	0	111.838	29	16	53	16	612	68.4	5.29	95.21		4.48	15		1	0	High	High	1	0		0		0		Met-loss+Acetyl [N-Term]; Carbamidomethyl [C305; C360]
FALSE	High	Master Protein	O88520	Shoc2	Leucine-rich repeat protein SHOC-2 [OS=Mus musculus]	0	10.889	5	3	6	3	582	64.9	8.46	11.69			3			0	High	High	1	0		0		0
FALSE	High	Master Protein	O88531	Ppt1	Palmitoyl-protein thioesterase 1 [OS=Mus musculus]	0	20.399	21	4	7	4	306	34.5	8	21.21			4			0	High	High	1	0		0		0		Carbamidomethyl [C152; C160]
FALSE	High	Master Protein	O88543	Cops3	COP9 signalosome complex subunit 3 [OS=Mus musculus]	0	124.559	40	13	40	13	423	47.8	6.65	90.88			13			0	High	High	1	0		0		0		Oxidation [M393; M408]; Carbamidomethyl [C25; C104; C146; C149; C154; C170; C298; C383]
FALSE	High	Master Protein	O88544	Cops4	COP9 signalosome complex subunit 4 [OS=Mus musculus]	0	103.941	48	15	42	15	406	46.3	5.83	79.27			15			0	High	High	1	0		0		0		Carbamidomethyl [C232; C255]
FALSE	High	Master Protein	O88545	Cops6	COP9 signalosome complex subunit 6 [OS=Mus musculus]	0	105.091	50	12	34	12	324	35.9	5.73	88.95	2.98	5.07	11	1	1	0	High	High	1	0		1	Deamidated [N82]	0		Carbamidomethyl [C140; C261; C263; C296]; Oxidation [M203]; Deamidated [N82]
FALSE	High	Master Protein	O88554	Parp2	Poly [ADP-ribose] polymerase 2 [OS=Mus musculus]	0	22.395	11	5	9	5	559	63.4	8.43	15.47			5			0	High	High	1	0		0		0		Carbamidomethyl [C145; C450]
FALSE	High	Master Protein	O88569	Hnrnpa2b1	heterogeneous nuclear ribonucleoproteins A2/B1 [OS=Mus musculus]	0	158.003	51	19	72	18	353	37.4	8.95	167.9	10.73		19	1		0	High	High	1	0		2	Deamidated [N178; N181]	0		Carbamidomethyl [C50]; Oxidation [M53]; Deamidated [N178; N181]
FALSE	High	Master Protein	O88587	Comt	Catechol O-methyltransferase [OS=Mus musculus]	0	63.145	55	11	31	11	265	29.5	5.83	53.1		3.8	10		1	0	High	High	1	0		0		0		Oxidation [M83; M93]; Carbamidomethyl [C76; C200; C234]
FALSE	High	Master Protein	O88622	Parg	Poly(ADP-ribose) glycohydrolase [OS=Mus musculus]	0	41.897	10	9	19	9	969	109.3	6.9	30.92			9			0	High	High	1	0		0		0		Carbamidomethyl [C153; C674]
FALSE	High	Master Protein	O88643	Pak1	Serine/threonine-protein kinase PAK 1 [OS=Mus musculus]	0	94.98	28	14	38	6	545	60.7	5.74	82.6			14			0	High	High	1	0		0		0		Carbamidomethyl [C411]; Met-loss+Acetyl [N-Term]; Oxidation [M431]
FALSE	High	Master Protein	O88667	Rrad	GTP-binding protein RAD [OS=Mus musculus]	0	20.344	16	4	7	3	308	33.3	9.1	8.77		5.76	3		1	0	High	High	1	0		0		0		Carbamidomethyl [C221; C227]
FALSE	High	Master Protein	O88685	Psmc3	26S proteasome regulatory subunit 6A [OS=Mus musculus]	0	195.172	51	21	74	21	442	49.5	5.19	186.84	11.11		21	1		0	High	High	1	0		1	Deamidated [N395]	0		Oxidation [M39; M178; M228; M376]; Carbamidomethyl [C390; C399; C403]; Deamidated [N395]
FALSE	High	Master Protein	O88696	Clpp	ATP-dependent Clp protease proteolytic subunit, mitochondrial [OS=Mus musculus]	0	22.094	21	5	12	5	272	29.8	7.47	15.35			5			0	High	High	1	0		0		0
FALSE	High	Master Protein	O88712	Ctbp1	C-terminal-binding protein 1 [OS=Mus musculus]	0	42.148	22	10	33	7	441	47.7	6.77	55.4		8.41	9		1	0	High	High	1	0		0		0		Carbamidomethyl [C38; C54]
FALSE	High	Master Protein	O88736	Hsd17b7	3-keto-steroid reductase [OS=Mus musculus]	0	18.624	12	4	4	4	334	37.3	6.73	5.47			4			0	High	High	1	0		0		0		Carbamidomethyl [C106]
FALSE	High	Master Protein	O88738	Birc6	Baculoviral IAP repeat-containing protein 6 [OS=Mus musculus]	0	272.4	13	49	100	49	4882	531.8	6.07	203.86	8.57		48	3		0	High	High	1	0		3	Deamidated [Q106; Q3623; Q4120]	0		Carbamidomethyl [C120; C139; C393; C399; C413; C466; C1241; C1324; C1341; C1381; C1389; C1397; C1422; C1425; C2081; C2915; C4468; C4691]; Deamidated [Q106; Q3623; Q4120]
FALSE	High	Master Protein	O88792	F11r	Junctional adhesion molecule A [OS=Mus musculus]	0	24.541	21	4	11	4	300	32.4	6.77	20.18		6.11	3		1	0	High	High	1	0		0		0		Carbamidomethyl [C49; C152]
FALSE	High	Master Protein	O88796	Rpp30	ribonuclease P protein subunit p30 [OS=Mus musculus]	0	19.267	25	5	8	5	268	29.5	9.06	13.73			5			0	High	High	1	0		0		0		Carbamidomethyl [C87; C261]
FALSE	High	Master Protein	O88811	Stam2	Signal transducing adapter molecule 2 [OS=Mus musculus]	0	28.233	11	6	13	4	523	57.4	5.07	17.99			6			0	High	High	1	0		0		0		Carbamidomethyl [C85]
FALSE	High	Master Protein	O88842	Fgd3	FYVE, RhoGEF and PH domain-containing protein 3 [OS=Mus musculus]	0	39.269	17	9	15	9	733	80.6	5.76	14.85	3.04		8	1		0	High	High	1	0		1	Deamidated [Q147]	0		Carbamidomethyl [C148; C537; C554; C559]; Deamidated [Q147]
FALSE	High	Master Protein	O88844	Idh1	Isocitrate dehydrogenase [NADP] cytoplasmic [OS=Mus musculus]	0	149.644	48	24	81	21	414	46.6	7.17	136.25		13.43	23		1	0	High	High	1	0		0		0		Carbamidomethyl [C73; C269; C379]; Oxidation [M199; M259]
FALSE	High	Master Protein	O88845	Akap10	A-kinase anchor protein 10, mitochondrial [OS=Mus musculus]	0	9.194	5	3	4	3	662	73.6	6.79	5.3			3			0	High	Not Found	1	0		0		0
FALSE	High	Master Protein	O88848	Arl6	ADP-ribosylation factor-like protein 6 [OS=Mus musculus]	0	6.358	9	2	2	2	186	20.9	8.25	4.34			2			0	High	High	1	0		0		0
FALSE	High	Master Protein	O88851	Rbbp9	Putative hydrolase RBBP9 [OS=Mus musculus]	0	37.681	41	5	11	5	186	20.9	5.97	22.88			5			0	High	High	1	0		0		0		Carbamidomethyl [C65]
FALSE	High	Master Protein	O88856	Tpst2	Protein-tyrosine sulfotransferase 2 [OS=Mus musculus]	0	14.114	7	2	3	2	376	42	9.35	7.87			2			0	High	High	1	0		0		0
FALSE	High	Master Protein	O88878	Zfand5	AN1-type zinc finger protein 5 [OS=Mus musculus]	0	26.985	26	5	9	4	213	23	8.51	16.26			5			0	High	High	1	0		0		0		Carbamidomethyl [C30; C33; C76; C168; C170; C175]
FALSE	High	Master Protein	O88879	Apaf1	apoptotic protease-activating factor 1 [OS=Mus musculus]	0	26.497	7	8	12	8	1249	140.9	6.43	19.33			8			0	High	High	1	0		0		0		Carbamidomethyl [C115; C258]
FALSE	High	Master Protein	O88895	Hdac3	Histone deacetylase 3 [OS=Mus musculus]	0	29.248	19	6	13	5	424	48.3	5.26	21.17			6			0	High	High	1	0		0		0		Carbamidomethyl [C123; C218]
FALSE	High	Master Protein	O88952	Lin7c	Protein lin-7 homolog C [OS=Mus musculus]	0	30.472	27	5	13	5	197	21.8	8.43	20.76			5			0	High	High	1	0		0		0
FALSE	High	Master Protein	O88958	Gnpda1	glucosamine-6-phosphate isomerase 1 [OS=Mus musculus]	0	22.205	32	8	17	7	289	32.5	6.6	9.25			8			0	High	High	1	0		0		0
FALSE	High	Master Protein	O88967	Yme1l1	ATP-dependent zinc metalloprotease YME1L1 [OS=Mus musculus]	0	37.103	15	10	22	10	715	80	8.97	33.65			10			0	High	High	1	0		0		0
FALSE	High	Master Protein	O88974	Setdb1	Histone-lysine N-methyltransferase SETDB1 [OS=Mus musculus]	0	17.65	4	6	11	6	1307	144.5	5.99	5.93			6			0	High	High	1	0		0		0		Carbamidomethyl [C802; C804; C809; C836]
FALSE	High	Master Protein	O88986	Gcat	2-amino-3-ketobutyrate coenzyme A ligase, mitochondrial [OS=Mus musculus]	0	57.795	27	7	16	7	416	44.9	7.33	39.13			7			0	High	High	1	0		0		0		Carbamidomethyl [C26; C103; C302; C346]
FALSE	High	Master Protein	O89001	Cpd	Carboxypeptidase D [OS=Mus musculus]	0	6.498	2	3	4	3	1377	152.3	6.18	0			3			0	High	High	1	0		0		0
FALSE	High	Master Protein	O89017	Lgmn	Legumain [OS=Mus musculus]	0	24.311	8	3	10	3	435	49.3	6.39	26.82			3			0	High	High	1	0		0		0		Carbamidomethyl [C52; C221]
FALSE	High	Master Protein	O89023	Tpp1	Tripeptidyl-peptidase 1 [OS=Mus musculus]	0	36.829	10	4	12	4	562	61.3	6.57	25.43			4			0	High	High	1	0		0		0
FALSE	High	Master Protein	O89032	Sh3pxd2a	SH3 and PX domain-containing protein 2A [OS=Mus musculus]	0	19.028	4	6	10	3	1124	124.1	8.75	13.21			6			0	High	High	1	0		0		0
FALSE	High	Master Protein	O89050	Mkln1	muskelin [OS=Mus musculus]	0	10.298	4	2	3	2	735	84.8	6.34	4.84			2			0	High	High	1	0		0		0		Carbamidomethyl [C411]
FALSE	High	Master Protein	O89051	Itm2b	Integral membrane protein 2B [OS=Mus musculus]	0	21.199	25	4	8	4	266	30.2	5.3	17.34			4			0	High	High	1	0		0		0		Carbamidomethyl [C38]
FALSE	High	Master Protein	O89079	Cope	coatomer subunit epsilon [OS=Mus musculus]	0	83.341	34	8	21	8	308	34.5	5.06	56.9	6.52		8	1		0	High	High	1	0		1	Deamidated [N220]	0		Carbamidomethyl [C34; C212; C225]; Deamidated [N220]
FALSE	High	Master Protein	O89086	Rbm3	RNA-binding protein 3 [OS=Mus musculus]	0	116.583	45	11	90	11	153	16.6	7.5	172.62	7.9	11.67	8	2	3	0	High	High	1	0		2	Deamidated [N68; N150]	0		Deamidated [N68; N150]; Oxidation [M64; M67]
FALSE	High	Master Protein	O89090	Sp1	Transcription factor Sp1 [OS=Mus musculus]	0	18.88	8	5	7	5	784	80.7	7.34	4.56			5			0	High	High	1	0		0		0		Carbamidomethyl [C70; C605; C607; C610; C689; C692]; Met-loss+Acetyl [N-Term]
FALSE	High	Master Protein	O89110	Casp8	Caspase-8 [OS=Mus musculus]	0	51.643	23	11	18	11	480	55.3	5.25	27.81			11			0	High	High	1	0		0		0		Carbamidomethyl [C26; C211; C311; C314; C315]
FALSE	High	Master Protein	O89112	Lancl1	LanC-like protein 1 [OS=Mus musculus]	0	31.62	24	7	13	7	399	45.3	7.77	18.44			7			0	High	High	1	0		0		0		Carbamidomethyl [C98; C183; C252; C355; C363]
FALSE	High	Master Protein	P00375	Dhfr	dihydrofolate reductase [OS=Mus musculus]	0	94.883	71	13	60	13	187	21.6	8.53	109.79			13			0	High	High	1	0		0		0		Carbamidomethyl [C7]; Met-loss [N-Term]; Oxidation [M15; M53; M112]
FALSE	High	Master Protein	P00397	Mtco1	Cytochrome c oxidase subunit 1 [OS=Mus musculus]	0	14.334	6	3	7	3	514	56.9	6.7	13.79		0	2		1	0	High	High	1	0		0		0
FALSE	High	Master Protein	P00405	Mtco2	Cytochrome c oxidase subunit 2 [OS=Mus musculus]	0	82.41	30	7	27	7	227	26	4.73	67.59		3.94	5		2	0	High	High	1	0		0		0		Oxidation [M86; M146; M152]
FALSE	High	Master Protein	P00493	Hprt1	Hypoxanthine-guanine phosphoribosyltransferase [OS=Mus musculus]	0	97.478	70	12	45	12	218	24.6	6.68	106.88		2.29	11		1	0	High	High	1	0		0		0		Carbamidomethyl [C23; C66; C106; C206]; Oxidation [M43; M57; M143]
FALSE	High	Master Protein	P01027	C3	Complement C3 [OS=Mus musculus]	0	148.434	22	33	59	33	1663	186.4	6.73	97.6			33			0	High	High	1	0		0		0		Carbamidomethyl [C720; C727; C728; C873; C1158; C1458; C1537; C1637]
FALSE	High	Master Protein	P01029	C4b	Complement C4-B [OS=Mus musculus]	0	17.611	1	4	9	4	1738	192.8	7.53	13.05			4			0	High	High	1	0		0		0
FALSE	High	Master Protein	P01831	Thy1	Thy-1 membrane glycoprotein [OS=Mus musculus]	0	31.189	31	4	7	4	162	18.1	8.97	19.68			4			0	High	Not Found	1	0		0		0		Carbamidomethyl [C28]
FALSE	High	Master Protein	P01887	B2m	Beta-2-microglobulin [OS=Mus musculus]	0	11.374	21	3	12	3	119	13.8	8.44	19.4			3			0	High	High	1	0		0		0
FALSE	High	Master Protein	P01898	H2-Q10	H-2 class I histocompatibility antigen, Q10 alpha chain [OS=Mus musculus]	0	36.181	14	4	12	1	325	37.2	5.25	26.21			4			0	High	Not Found	1	0		0		0		Oxidation [M76]
FALSE	High	Master Protein	P01899	H2-D1	H-2 class I histocompatibility antigen, D-B alpha chain [OS=Mus musculus]	0	165.383	46	18	86	12	362	40.8	6.73	154.46			18			0	High	High	1	0		0		0		Oxidation [M76; M162; M355]; Carbamidomethyl [C188]
FALSE	High	Master Protein	P01901	H2-K1	H-2 class I histocompatibility antigen, K-B alpha chain [OS=Mus musculus]	0	119.353	48	15	77	5	369	41.3	6.39	139.65			15			0	High	High	1	0		0		0		Carbamidomethyl [C122; C185; C280; C358]; Oxidation [M73]
FALSE	High	Master Protein	P01942	Hba	Hemoglobin subunit alpha [OS=Mus musculus]	0	10.217	15	2	4	2	142	15.1	8.22	13.3			2			0	High	High	1	0		0		0
FALSE	High	Master Protein	P02088	Hbb-b1	Hemoglobin subunit beta-1 [OS=Mus musculus]	0.001	3.902	13	2	4	2	147	15.8	7.65	1.91			2			0	High	High	1	0		0		0
FALSE	High	Master Protein	P02340	Tp53	Cellular tumor antigen p53 [OS=Mus musculus]	0	126.359	49	15	57	15	387	43.1	7.23	127.92			15			0	High	High	1	0		0		0		Carbamidomethyl [C118; C129; C135; C176; C232; C236; C305]
FALSE	High	Master Protein	P02463	Col4a1	Collagen alpha-1(IV) chain [OS=Mus musculus]	0	33.585	3	5	21	5	1669	160.6	8.24	47.04			5			0	High	High	1	0		0		0		Carbamidomethyl [C1460; C1493; C1616]
FALSE	High	Master Protein	P02468	Lamc1	Laminin subunit gamma-1 [OS=Mus musculus]	0	266.836	29	35	87	35	1607	177.2	5.21	199.73	6.11	9.02	34	1	1	0	High	High	1	0		1	Deamidated [Q893]	0		Carbamidomethyl [C38; C180; C314; C317; C349; C393; C396; C398; C408; C461; C463; C472; C475; C790; C793; C802; C805; C823; C826; C828; C840; C850; C859; C862; C879; C882; C884; C896; C903; C905; C914; C917; C930; C933; C935; C945; C952; C954; C963; C1026; C1029; C1032]; Deamidated [Q893]
FALSE	High	Master Protein	P02469	Lamb1	Laminin subunit beta-1 [OS=Mus musculus]	0	335.457	33	47	123	47	1786	197	4.94	282.7	6.04	3.84	46	2	1	0	High	High	1	0		2	Deamidated [Q1010; Q1146]	0		Carbamidomethyl [C56; C65; C76; C79; C170; C190; C271; C273; C280; C298; C300; C309; C312; C374; C377; C437; C440; C455; C458; C460; C472; C479; C481; C643; C671; C755; C933; C944; C946; C1000; C1009; C1012; C1028; C1030; C1054; C1056; C1065; C1114; C1117; C1129; C1144; C1151; C1153; C1425; C1430]; Deamidated [Q1010; Q1146]
FALSE	High	Master Protein	P02798	Mt2	metallothionein-2 [OS=Mus musculus]	0	92.379	84	5	68	5	61	6.1	7.83	57.21	12.49		5	1		0	High	High	1	1	Acetyl [N-Term]	0		0		Carbamidomethyl [C5; C7; C13; C15; C19; C33; C34; C36; C37; C41; C44; C48; C50; C57; C59; C60]; Oxidation [M1; D2]; Acetyl [N-Term]
FALSE	High	Master Protein	P02802	Mt1	Metallothionein-1 [OS=Mus musculus]	0	56.394	74	4	36	4	61	6	7.96	55.14	7.75		4	1		0	High	High	1	1	Acetyl [N-Term]	0		0		Carbamidomethyl [C5; C7; C13; C15; C19; C21; C33; C34; C36; C37; C41; C57; C59; C60]; Acetyl [N-Term]; Oxidation [D2]
FALSE	High	Master Protein	P03888	Mtnd1	NADH-ubiquinone oxidoreductase chain 1 [OS=Mus musculus]	0	11.463	11	3	7	3	318	36	6.93	16.18			3			0	High	High	1	0		0		0
FALSE	High	Master Protein	P03958	Ada	adenosine deaminase [OS=Mus musculus]	0	29.775	29	9	14	9	352	40	5.72	14.65			9			0	High	High	1	0		0		0		Met-loss+Acetyl [N-Term]; Carbamidomethyl [C153; C154]
FALSE	High	Master Protein	P04117	Fabp4	Fatty acid-binding protein, adipocyte [OS=Mus musculus]	0	69.908	48	9	33	9	132	14.6	8.4	83.99			9			0	High	High	1	0		0		0		Carbamidomethyl [C2; C118]; Oxidation [M21]; Met-loss+Acetyl [N-Term]
FALSE	High	Master Protein	P04184	Tk1	Thymidine kinase, cytosolic [OS=Mus musculus]	0	55.305	42	8	17	8	233	25.8	8.59	47.85			8			0	High	High	1	0		0		0		Carbamidomethyl [C79; C153; C156; C185; C205]
FALSE	High	Master Protein	P04223	H2-K1	H-2 class I histocompatibility antigen, K-K alpha chain [OS=Mus musculus]	0	69.44	29	10	33	1	369	41.6	7.03	71.14			10			0	High	Not Found	1	0		0		0		Carbamidomethyl [C185; C280; C358]
FALSE	High	Master Protein	P04627	Araf	serine/threonine-protein kinase A-Raf [OS=Mus musculus]	0	37.325	18	9	21	7	604	67.5	9.11	28.46			9			0	High	High	1	0		0		0		Oxidation [M39]; Carbamidomethyl [C58; C59]
FALSE	High	Master Protein	P05063	Aldoc	Fructose-bisphosphate aldolase C [OS=Mus musculus]	0	76.711	28	9	64	3	363	39.4	7.12	79.39	25.56	19.25	7	3	1	0	High	High	1	0		1	Deamidated [Q180]	0		Carbamidomethyl [C178; C202; C240]; Oxidation [P231; N232; P236]; Deamidated [Q180]
FALSE	High	Master Protein	P05064	Aldoa	fructose-bisphosphate aldolase A [OS=Mus musculus]	0	527.197	94	49	446	43	364	39.3	8.09	915.88	100.85	127.03	35	7	14	0	High	High	1	0		6	Deamidated [N55; N120; Q126; Q180; Q275; Q348]	0		Carbamidomethyl [C73; C178; C202; C240; C290; C339]; Oxidation [M165; M233; M251]; Deamidated [N55; N120; Q126; Q180; Q275; Q348]; Met-loss [N-Term]
FALSE	High	Master Protein	P05132	Prkaca	cAMP-dependent protein kinase catalytic subunit alpha [OS=Mus musculus]	0	95.106	39	16	47	8	351	40.5	8.79	114.28			16			0	High	High	1	0		0		0
FALSE	High	Master Protein	P05201	Got1	Aspartate aminotransferase, cytoplasmic [OS=Mus musculus]	0	177.506	65	25	83	25	413	46.2	7.14	197.14		0	24		1	0	High	High	1	0		0		0		Carbamidomethyl [C160; C391]; Oxidation [M390]; Met-loss [N-Term]
FALSE	High	Master Protein	P05202	Got2	Aspartate aminotransferase, mitochondrial [OS=Mus musculus]	0	300.16	79	35	218	35	430	47.4	9	512.78	24.4	34.93	29	4	5	0	High	High	1	0		4	Deamidated [N71; Q204; N322; Q377]	0		Oxidation [M60; M174; M281; M380; M402]; Carbamidomethyl [C106; C187; C212; C272; C274; C295; C382]; Deamidated [N71; Q204; N322; Q377]
FALSE	High	Master Protein	P05480	Src	Neuronal proto-oncogene tyrosine-protein kinase Src [OS=Mus musculus]	0	65.794	30	13	24	10	541	60.6	7.84	38.04			13			0	High	High	1	0		0		0		Carbamidomethyl [C193; C253; C408; C491; C495; C504; C506]
FALSE	High	Master Protein	P05622	Pdgfrb	Platelet-derived growth factor receptor beta [OS=Mus musculus]	0	74.73	17	16	37	14	1098	122.7	5.12	74.51			16			0	High	High	1	0		0		0		Carbamidomethyl [C683; C834; C842]
FALSE	High	Master Protein	P06151	Ldha	L-lactate dehydrogenase A chain [OS=Mus musculus]	0	450.387	80	40	406	38	332	36.5	7.74	751	18.35	82.45	28	3	12	0	High	High	1	0		1	Deamidated [N205]	0		Oxidation [M54; M62; M63; M174; K224; K228; M276]; Carbamidomethyl [C35; C84; C163; C185]; Deamidated [N205]; Met-loss+Acetyl [N-Term]
FALSE	High	Master Protein	P06537	Nr3c1	Glucocorticoid receptor [OS=Mus musculus]	0	18.217	7	5	9	5	783	86	6.35	8.22			5			0	High	High	1	0		0		0		Carbamidomethyl [C464]
FALSE	High	Master Protein	P06745	Gpi	glucose-6-phosphate isomerase [OS=Mus musculus]	0	315.941	58	35	187	35	558	62.7	8.13	375.56	18.8	5.07	31	3	3	0	High	High	1	0		2	Deamidated [N360; N543]	0		Oxidation [M67; M119; M357; M401; M437]; Deamidated [N360; N543]; Met-loss+Acetyl [N-Term]; Carbamidomethyl [C404]
FALSE	High	Master Protein	P06795	Abcb1b	multidrug resistance protein 1B [OS=Mus musculus]	0	69.504	16	18	34	8	1276	140.9	8.34	37.5	1.79		17	1		0	High	High	1	0		0		0		Carbamidomethyl [C430; C1072]
FALSE	High	Master Protein	P06797	Ctsl	Cathepsin L1 [OS=Mus musculus]	0	93.437	48	14	31	14	334	37.5	6.83	67.99	10.87	7.97	12	2	1	0	High	High	1	0		2	Deamidated [N193; Q257]	0		Carbamidomethyl [C169; C178; C269; C322]; Deamidated [N193; Q257]; Oxidation [M111]
FALSE	High	Master Protein	P06801	Me1	NADP-dependent malic enzyme [OS=Mus musculus]	0	85.709	39	16	38	16	572	63.9	7.44	69.3			16			0	High	High	1	0		0		0		Carbamidomethyl [C164; C240; C415; C420]
FALSE	High	Master Protein	P07091	S100a4	Protein S100-A4 [OS=Mus musculus]	0	28.088	64	7	39	7	101	11.7	5.31	30.09		11.85	5		2	0	High	High	1	0		0		0		Carbamidomethyl [C86; C93]; Oxidation [M59]
FALSE	High	Master Protein	P07141	Csf1	Macrophage colony-stimulating factor 1 [OS=Mus musculus]	0	24.923	11	5	9	5	552	60.6	5.24	24.94			5			0	High	High	1	0		0		0		Carbamidomethyl [C122]
FALSE	High	Master Protein	P07214	Sparc	Sparc [OS=Mus musculus]	0	110.237	44	12	49	12	302	34.4	4.86	112			12			0	High	High	1	0		0		0		Carbamidomethyl [C82; C92; C94; C100; C122; C148; C154; C264; C272]; Oxidation [M261]
FALSE	High	Master Protein	P07356	Anxa2	Annexin A2 [OS=Mus musculus]	0	357.522	73	38	207	38	339	38.7	7.69	499.27		8.82	35		3	0	High	High	1	0		0		0		Carbamidomethyl [C9; C133]; Oxidation [M171; M217; M240; M300]; Met-loss+Acetyl [N-Term]
FALSE	High	Master Protein	P07607	Tyms	thymidylate synthase [OS=Mus musculus]	0	108.112	48	11	26	11	307	34.9	6.46	81.33			11			0	High	High	1	0		0		0		Oxidation [M143]; Carbamidomethyl [C174]
FALSE	High	Master Protein	P07724	Alb	Serum albumin [OS=Mus musculus]	0	16.801	4	2	12	2	608	68.6	6.07	30.19			2			0	High	High	1	0		0		0		Carbamidomethyl [C269; C270; C277]
FALSE	High	Master Protein	P07742	Rrm1	Ribonucleoside-diphosphate reductase large subunit [OS=Mus musculus]	0	202.701	44	29	84	29	792	90.2	6.7	161.52	3.77		29	1		0	High	High	1	0		1	Deamidated [Q609]	0		Carbamidomethyl [C26; C238; C254; C425; C429; C662; C779; C787; C790]; Oxidation [M655; M723]; Deamidated [Q609]
FALSE	High	Master Protein	P07901	Hsp90aa1	Heat shock protein HSP 90-alpha [OS=Mus musculus]	0	779.31	70	76	965	45	733	84.7	5.01	2238.35	37.82	46.75	63	5	10	0	High	High	1	0		2	Deamidated [N106; Q159]	2	Phospho [S231; S263]	Deamidated [N106; Q159]; Oxidation [M98; M372; M611; M626; M629]; Carbamidomethyl [C375; C421; C482; C530; C573; C598; C599]; Phospho [S231; S263]
FALSE	High	Master Protein	P08003	Pdia4	Protein disulfide-isomerase A4 [OS=Mus musculus]	0	413.321	54	48	233	48	638	71.9	5.31	529.02	8.76		48	2		0	High	High	1	0		1	Deamidated [Q370]	0		Oxidation [M120; M367; M481; M533; M576]; Deamidated [Q370]; Carbamidomethyl [C548; C551]
FALSE	High	Master Protein	P08030	Aprt	Adenine phosphoribosyltransferase [OS=Mus musculus]	0	64.245	37	10	53	10	180	19.7	6.79	100.12		5.74	9		1	0	High	High	1	0		0		0
FALSE	High	Master Protein	P08074	Cbr2	Carbonyl reductase [NADPH] 2 [OS=Mus musculus]	0	45.185	36	9	21	9	244	25.9	9.01	44.45			9			0	High	High	1	0		0		0		Carbamidomethyl [C51; C58]
FALSE	High	Master Protein	P08113	Hsp90b1	Endoplasmin [OS=Mus musculus]	0	835.356	66	72	447	69	802	92.4	4.82	1036.87	18.31	27.25	68	5	4	0	High	High	1	0		4	Deamidated [Q50; N107; N228; N276]	0		Oxidation [M154; M425; M426; M541; M622; M658]; Deamidated [Q50; N107; N228; N276]; Carbamidomethyl [C576; C645]
FALSE	High	Master Protein	P08121	Col3a1	Collagen alpha-1(III) chain [OS=Mus musculus]	0	78.86	10	12	35	12	1464	138.9	6.52	73.48	10.83		12	1		0	High	High	1	0		0		0		Carbamidomethyl [C1283; C1415]; Oxidation [P1075]
FALSE	High	Master Protein	P08122	Col4a2	Collagen alpha-2(IV) chain [OS=Mus musculus]	0	21.301	3	4	7	4	1707	167.2	8.48	14.38			4			0	High	High	1	0		0		0		Carbamidomethyl [C1499; C1532; C1653]
FALSE	High	Master Protein	P08207	S100a10	Protein S100-A10 [OS=Mus musculus]	0	67.409	51	5	36	5	97	11.2	6.77	57.06			5			0	High	High	1	0		0		0		Met-loss [N-Term]; Oxidation [M12; M13]
FALSE	High	Master Protein	P08228	Sod1	Superoxide dismutase [Cu-Zn] [OS=Mus musculus]	0	214.521	93	15	122	15	154	15.9	6.51	357.31	15.27	5.4	13	4	2	0	High	High	1	0		3	Deamidated [Q43; N87; Q124]	0		Carbamidomethyl [C7; C58; C147]; Deamidated [Q43; N87; Q124]; Oxidation [M118]
FALSE	High	Master Protein	P08249	Mdh2	Malate dehydrogenase, mitochondrial [OS=Mus musculus]	0	227.968	67	25	298	25	338	35.6	8.68	564.95		4.36	24		1	0	High	High	1	0		0		0		Oxidation [M251; M266; M315]; Carbamidomethyl [C89; C93; C212; C275; C285]
FALSE	High	Master Protein	P08556	Nras	GTPase NRas [OS=Mus musculus]	0	36.182	51	7	17	2	189	21.2	5.17	38.9			7			0	High	High	1	0		0		0		Carbamidomethyl [C80; C118]
FALSE	High	Master Protein	P08752	Gnai2	guanine nucleotide-binding protein G(i) subunit alpha-2 [OS=Mus musculus]	0	111.699	45	15	52	11	355	40.5	5.45	100.55			15			0	High	High	1	0		0		0		Carbamidomethyl [C66; C140; C255; C326; C352]; Oxidation [M199]
FALSE	High	Master Protein	P08775	Polr2a	DNA-directed RNA polymerase II subunit RPB1 [OS=Mus musculus]	0	19.125	4	7	9	7	1970	217	7.37	4.63			7			0	High	High	1	0		0		0		Carbamidomethyl [C148; C451; C981]
FALSE	High	Master Protein	P09055	Itgb1	Integrin beta-1 [OS=Mus musculus]	0	279.785	38	30	143	30	798	88.2	5.94	335.79	13.73	7.37	28	1	2	0	High	High	1	0		2	Deamidated [N564; N571]	0		Carbamidomethyl [C64; C75; C464; C466; C500; C502; C516; C525; C531; C533; C536; C538; C553; C555; C560; C568; C574; C613; C615; C618; C630; C633; C636; C640; C691]; Oxidation [M170; M173; M193; M512]; Deamidated [N564; N571]
FALSE	High	Master Protein	P09103	P4hb	Protein disulfide-isomerase [OS=Mus musculus]	0	564.53	81	63	327	63	509	57	4.88	616.05	34.29	67.65	50	8	12	0	High	High	1	0		7	Deamidated [N109; Q360; N389; N432; N460; Q477; Q502]	0		Carbamidomethyl [C55; C58; C314; C345; C399; C402]; Deamidated [N109; Q360; N389; N432; N460; Q477; Q502]; Oxidation [P53; M326; M358; P397; M427; M496]
FALSE	High	Master Protein	P09242	Alpl	Alkaline phosphatase, tissue-nonspecific isozyme [OS=Mus musculus]	0.001	4.214	5	2	3	2	524	57.5	7.01	0			2			0	High	Not Found	1	0		0		0
FALSE	High	Master Protein	P09405	Ncl	Nucleolin [OS=Mus musculus]	0	363.266	42	43	346	43	707	76.7	4.75	672.53	19.04	4.71	40	3	2	0	High	High	1	0		2	Deamidated [N310; N493]	0		Carbamidomethyl [C544]; Oxidation [M419; M547; M627]; Deamidated [N310; N493]
FALSE	High	Master Protein	P09411	Pgk1	phosphoglycerate kinase 1 [OS=Mus musculus]	0	648.108	87	51	534	51	417	44.5	7.9	1162.46	37	73.07	38	7	13	0	High	High	1	0		5	Deamidated [N31; N163; N295; Q300; N384]	0		Oxidation [M29; M61; M72; M176; M227; M234; M251; P308; M312; N337; M356]; Carbamidomethyl [C50; C316; C367; C379; C380]; Deamidated [N31; N163; N295; Q300; N384]; Met-loss+Acetyl [N-Term]
FALSE	High	Master Protein	P09528	Fth1	Ferritin heavy chain [OS=Mus musculus]	0	31.856	38	6	11	6	182	21.1	5.88	22.34			6			0	High	High	1	0		0		0
FALSE	High	Master Protein	P09671	Sod2	Superoxide dismutase [Mn], mitochondrial [OS=Mus musculus]	0	67.618	41	9	28	9	222	24.6	8.62	61.7	3.98		9	1		0	High	High	1	0		1	Deamidated [N60]	0		Deamidated [N60]
FALSE	High	Master Protein	P09925	Surf1	Surfeit locus protein 1 [OS=Mus musculus]	0	10.168	20	5	10	5	306	34.8	9.72	1.65			5			0	High	High	1	0		0		0
FALSE	High	Master Protein	P09926	Surf2	Surfeit locus protein 2 [OS=Mus musculus]	0	9.211	9	2	3	2	257	30.3	9.23	2.06			2			0	High	High	1	0		0		0		Carbamidomethyl [C29; C38; C127]
FALSE	High	Master Protein	P0C605	Prkg1	cGMP-dependent protein kinase 1 [OS=Mus musculus]	0	41.652	15	9	15	2	671	76.3	6.04	11.72			9			0	High	High	1	0		0		0		Carbamidomethyl [C43; C196]
FALSE	High	Master Protein	P0CW02	Ly6c1	Lymphocyte antigen 6C1 [OS=Mus musculus]	0	13.623	45	3	5	3	131	14.2	6.01	8.38		8.58	2		1	0	High	High	1	0		0		0		Carbamidomethyl [C29; C32; C41; C46; C53; C74; C78]
FALSE	High	Master Protein	P0DOV1	Mnda	interferon-activable protein 205-B [OS=Mus musculus]	0	272.645	81	28	104	4	425	46.9	8	253.61	25.85	6.89	26	3	1	0	High	High	1	1	Acetyl [N-Term]	3	Deamidated [N98; Q133; Q374]	1	Phospho [T106]	Carbamidomethyl [C16; C69; C180; C181; C188; C317; C380; C390; C404]; Deamidated [N98; Q133; Q374]; Acetyl [N-Term]; Oxidation [M114; M252; M311]; Phospho [T106]
FALSE	High	Master Protein	P0DOV2	Ifi204	interferon-activable protein 204 [OS=Mus musculus]	0	299.094	65	38	116	18	619	69.4	8.69	248.36	26.76		37	3		0	High	High	1	1	Acetyl [N-Term]	1	Deamidated [N98]	2	Phospho [T106; S190]	Carbamidomethyl [C16; C69; C180; C181; C188; C390; C404; C504]; Phospho [T106; S190]; Oxidation [M114; M612]; Acetyl [N-Term]; Deamidated [N98]
FALSE	High	Master Protein	P10107	Anxa1	annexin A1 [OS=Mus musculus]	0	467.958	79	42	212	42	346	38.7	7.37	537.95	18.15	15.49	39	3	3	0	High	High	1	0		2	Deamidated [N16; N88]	0		Deamidated [N16; N88]; Carbamidomethyl [C189; C263; C270; C324; C343]; Oxidation [M3; M127; M286; M308]; Met-loss+Acetyl [N-Term]
FALSE	High	Master Protein	P10126	Eef1a1	Elongation factor 1-alpha 1 [OS=Mus musculus]	0	572.605	75	55	1032	55	462	50.1	9.01	2755.17	17.66	115.55	30	3	24	0	High	High	1	0		5	Deamidated [N101; Q108; N130; N153; N348]	0		Carbamidomethyl [C111; C234; C363; C370; C411]; Oxidation [M49; M102; M155; M201; M208; M276; M335; M404; M410]; Deamidated [N101; Q108; N130; N153; N348]
FALSE	High	Master Protein	P10493	Nid1	Nidogen-1 [OS=Mus musculus]	0	53.031	14	13	19	13	1245	136.5	5.44	28.29	2.05		12	1		0	High	High	1	0		1	Deamidated [N758]	0		Carbamidomethyl [C409; C410; C748; C760; C767]; Deamidated [N758]
FALSE	High	Master Protein	P10518	Alad	Delta-aminolevulinic acid dehydratase [OS=Mus musculus]	0	78.22	32	11	34	11	330	36	6.79	84.13			11			0	High	High	1	0		0		0		Carbamidomethyl [C75; C162; C203]
FALSE	High	Master Protein	P10605	Ctsb	Cathepsin B [OS=Mus musculus]	0	274.927	54	24	154	24	339	37.3	5.91	349.17		54.77	16		8	0	High	High	1	0		0		0		Carbamidomethyl [C59; C93; C105; C108; C179; C211; C319]; Oxidation [M240; M274; M275]
FALSE	High	Master Protein	P10630	Eif4a2	eukaryotic initiation factor 4A-II [OS=Mus musculus]	0	165.692	49	24	137	8	407	46.4	5.48	264.94		2.38	23		1	0	High	High	1	0		0		0		Carbamidomethyl [C67]; Oxidation [M166; M179; M188]
FALSE	High	Master Protein	P10639	Txn	thioredoxin [OS=Mus musculus]	0	111.157	97	14	270	14	105	11.7	4.92	348.67		20.99	12		2	0	High	High	1	0		0		0		Carbamidomethyl [C32; C35; C46; C62; C69; C73]; Oxidation [M37; M74]; Met-loss [N-Term]
FALSE	High	Master Protein	P10649	Gstm1	Glutathione S-transferase Mu 1 [OS=Mus musculus]	0	131.727	61	16	71	13	218	26	7.94	157.1			16			0	High	High	1	0		0		0		Oxidation [M3; M19; M35; M105]; Carbamidomethyl [C115; C174]; Met-loss [N-Term]
FALSE	High	Master Protein	P10711	Tcea1	Transcription elongation factor A protein 1 [OS=Mus musculus]	0	156.978	52	18	69	18	301	33.9	8.38	173.16			18			0	High	High	1	1	Acetyl [N-Term]	0		0		Oxidation [M48]; Acetyl [N-Term]; Carbamidomethyl [C263; C271; C291; C294]
FALSE	High	Master Protein	P10833	Rras	Ras-related protein R-Ras [OS=Mus musculus]	0	54.301	47	9	33	7	218	23.7	6.79	53.7			9			0	High	High	1	0		0		0		Carbamidomethyl [C70]
FALSE	High	Master Protein	P10852	Slc3a2	4F2 cell-surface antigen heavy chain [OS=Mus musculus]	0	149.25	42	21	75	1	526	58.3	5.91	163.27		2.36	20		1	0	High	Not Found	1	0		0		0		Met-loss+Acetyl [N-Term]
FALSE	High	Master Protein	P10923	Spp1	Osteopontin [OS=Mus musculus]	0	26.6	17	3	5	3	294	32.4	4.53	17.74			3			0	High	High	1	0		0		0
FALSE	High	Master Protein	P11031	Sub1	Activated RNA polymerase II transcriptional coactivator p15 [OS=Mus musculus]	0	98.005	43	6	53	6	127	14.4	9.6	119.22			6			0	High	High	1	0		0		0		Oxidation [M63; M90; M96; M107]
FALSE	High	Master Protein	P11087	Col1a1	Collagen alpha-1(I) chain [OS=Mus musculus]	0	494.512	55	48	151	47	1453	137.9	5.85	272.38	106.54	3.77	43	18	1	0	High	High	1	0		2	Deamidated [N1052; Q1286]	0		Oxidation [M170; P187; P193; P194; P197; P200; P364; P365; P416; P440; K494; P512; P518; P524; P533; P536; P560; P611; P763; P767; P860; P866; P908; P913; P914; P988; P991; P992; P997; P1034; P1109; P1112; P1115; M1282; M1366]; Carbamidomethyl [C31; C82; C83; C86; C1271; C1280; C1288; C1404]; Deamidated [N1052; Q1286]
FALSE	High	Master Protein	P11103	Parp1	Poly [ADP-ribose] polymerase 1 [OS=Mus musculus]	0	124.099	28	22	51	22	1013	113	8.95	109.59			22			0	High	High	1	0		0		0		Carbamidomethyl [C56; C162; C256; C295; C311]
FALSE	High	Master Protein	P11157	Rrm2	ribonucleoside-diphosphate reductase subunit M2 [OS=Mus musculus]	0	118.858	46	16	46	16	390	45.1	5.45	113.35			16			0	High	High	1	0		0		0		Carbamidomethyl [C203; C271; C275; C318]; Oxidation [M316]
FALSE	High	Master Protein	P11214	Plat	Tissue-type plasminogen activator [OS=Mus musculus]	0	24.096	10	5	6	5	559	63.1	8.15	12.05			5			0	High	High	1	0		0		0		Carbamidomethyl [C124; C176; C200; C205; C490]
FALSE	High	Master Protein	P11276	Fn1	fibronectin [OS=Mus musculus]	0	133.199	13	27	58	27	2477	272.4	5.59	96			27			0	High	High	1	0		0		0		Carbamidomethyl [C77; C79; C88; C98; C136; C180; C259; C261; C374; C386; C508; C587; C589; C2323; C2325]
FALSE	High	Master Protein	P11352	Gpx1	Glutathione peroxidase 1 [OS=Mus musculus]	0	17.73	29	4	6	4	201	22.3	7.21	13.69		5.59	3		1	0	High	High	1	0		0		0		Carbamidomethyl [C154]
FALSE	High	Master Protein	P11404	Fabp3	Fatty acid-binding protein, heart [OS=Mus musculus]	0	15.873	31	4	12	4	133	14.8	6.57	12.56			4			0	High	High	1	0		0		0		Met-loss+Acetyl [N-Term]
FALSE	High	Master Protein	P11438	Lamp1	Lysosome-associated membrane glycoprotein 1 [OS=Mus musculus]	0	38.053	13	5	38	5	406	43.8	8.4	67.26			5			0	High	High	1	0		0		0		Carbamidomethyl [C149; C327]; Oxidation [M133]
FALSE	High	Master Protein	P11440	Cdk1	Cyclin-dependent kinase 1 [OS=Mus musculus]	0	271.374	79	26	123	24	297	34.1	8.43	327.85		12.11	24		2	0	High	High	1	1	Acetyl [N-Term]	0		0		Oxidation [M32; M71]; Acetyl [N-Term]; Carbamidomethyl [C119]
FALSE	High	Master Protein	P11499	Hsp90ab1	Heat shock protein HSP 90-beta [OS=Mus musculus]	0	1082.29	74	94	1233	60	724	83.2	5.03	2754.65	113.13	90.45	72	18	16	0	High	High	1	0		9	Deamidated [N46; N101; Q154; Q207; N310; N346; Q493; N496; N614]	2	Phospho [S226; S255]	Deamidated [N46; N101; Q154; Q207; N310; N346; Q493; N496; N614]; Carbamidomethyl [C366; C412; C521; C564; C589; C590]; Oxidation [M93; M363; M466; M513; M567; M602; M617; M620; M621]; Phospho [S226; S255]
FALSE	High	Master Protein	P11531	Dmd	Dystrophin [OS=Mus musculus]	0.002	3.68	0	2	4	2	3678	425.6	5.94	5.18			2			0	High	High	1	0		0		0
FALSE	High	Master Protein	P11672	Lcn2	Neutrophil gelatinase-associated lipocalin [OS=Mus musculus]	0	39.621	32	5	17	5	200	22.9	8.81	34.34			5			0	High	High	1	0		0		0		Oxidation [M119]; Carbamidomethyl [C197]
FALSE	High	Master Protein	P11688	Itga5	Integrin alpha-5 [OS=Mus musculus]	0	148.523	26	25	89	25	1053	115	5.95	149.18		9.62	23		2	0	High	High	1	0		0		0		Carbamidomethyl [C159; C195; C734; C925; C961]; Oxidation [M740; M1040]
FALSE	High	Master Protein	P11928	Oas1a	2'-5'-oligoadenylate synthase 1A [OS=Mus musculus]	0	60.883	27	10	22	10	367	42.4	8.09	39.8			10			0	High	Not Found	1	1	Acetyl [N-Term]	0		0		Carbamidomethyl [C39; C46; C190]; Acetyl [N-Term]
FALSE	High	Master Protein	P11930	Nudt19	nucleoside diphosphate-linked moiety X motif 19 [OS=Mus musculus]	0	7.573	14	3	4	3	357	40.3	6.68	4.35			3			0	High	High	1	0		0		0		Carbamidomethyl [C259]
FALSE	High	Master Protein	P11983	Tcp1	T-complex protein 1 subunit alpha [OS=Mus musculus]	0	324.825	58	32	177	32	556	60.4	6.16	426.02		9.41	30		2	0	High	High	1	0		0		0		Carbamidomethyl [C147; C218; C236; C385; C397]; Oxidation [M23; M384; M388]
FALSE	High	Master Protein	P12023	App	Amyloid-beta A4 protein [OS=Mus musculus]	0	16.676	5	3	6	3	770	86.7	4.79	14.17			3			0	High	High	1	0		0		0		Carbamidomethyl [C291; C300]
FALSE	High	Master Protein	P12032	Timp1	Metalloproteinase inhibitor 1 [OS=Mus musculus]	0	19.424	24	5	19	5	205	22.6	8.82	33.16			5			0	High	High	1	0		0		0		Carbamidomethyl [C94; C189; C197]
FALSE	High	Master Protein	P12265	Gusb	beta-glucuronidase [OS=Mus musculus]	0	82.827	38	21	53	21	648	74.1	6.7	101.73			21			0	High	High	1	0		0		0		Carbamidomethyl [C165; C392]
FALSE	High	Master Protein	P12367	Prkar2a	cAMP-dependent protein kinase type II-alpha regulatory subunit [OS=Mus musculus]	0	85.769	27	10	32	7	401	45.4	4.89	70.58			10			0	High	High	1	0		0		0		Oxidation [M209]; Carbamidomethyl [C131; C371]
FALSE	High	Master Protein	P12382	Pfkl	ATP-dependent 6-phosphofructokinase, liver type [OS=Mus musculus]	0	342.905	41	33	155	27	780	85.3	7.17	382.22		15.79	30		3	0	High	High	1	0		0		0		Oxidation [M30; M186; M349; M683; M758]; Carbamidomethyl [C351; C630; C708]; Met-loss+Acetyl [N-Term]
FALSE	High	Master Protein	P12388	Serpinb2	plasminogen activator inhibitor 2, macrophage [OS=Mus musculus]	0	76.268	39	13	21	13	415	46.3	5.14	51.04			13			0	High	High	1	0		0		0		Carbamidomethyl [C79]
FALSE	High	Master Protein	P12787	Cox5a	Cytochrome c oxidase subunit 5A, mitochondrial [OS=Mus musculus]	0	34.297	49	7	17	7	146	16.1	6.54	20.44		20.59	6		1	0	High	High	1	0		0		0
FALSE	High	Master Protein	P12815	Pdcd6	programmed cell death protein 6 [OS=Mus musculus]	0	42.757	40	9	22	9	191	21.9	5.4	45.77			9			0	High	High	1	0		0		0
FALSE	High	Master Protein	P12849	Prkar1b	cAMP-dependent protein kinase type I-beta regulatory subunit [OS=Mus musculus]	0	29.783	13	6	22	2	381	43.2	5.96	42.71			6			0	Not Found	High	1	0		0		0		Oxidation [M236]
FALSE	High	Master Protein	P12970	Rpl7a	60S ribosomal protein L7a [OS=Mus musculus]	0	225.202	53	23	142	23	266	30	10.56	370.68	3.71		23	1		0	High	High	1	0		1	Deamidated [N208]	0		Carbamidomethyl [C182; C199]; Oxidation [M177]; Deamidated [N208]
FALSE	High	Master Protein	P13011	Scd2	Acyl-CoA desaturase 2 [OS=Mus musculus]	0	26.38	8	4	11	4	358	40.9	9.01	6.51			4			0	High	High	1	0		0		0		Oxidation [M211]
FALSE	High	Master Protein	P13020	Gsn	Isoform 2 of Gelsolin [OS=Mus musculus]	0	381.8	51	36	189	36	731	80.7	5.76	528.98	7.67	28.73	32	2	4	0	High	High	1	1	Acetyl [N-Term]	2	Deamidated [N254; Q416]	0		Carbamidomethyl [C280; C621]; Met-loss [N-Term]; Acetyl [N-Term]; Deamidated [N254; Q416]
FALSE	High	Master Protein	P13439	Umps	uridine 5'-monophosphate synthase [OS=Mus musculus]	0	111.636	46	23	72	23	481	52.3	6.61	140.23	4.83		22	1		0	High	High	1	0		2	Deamidated [Q184; Q185]	0		Carbamidomethyl [C174]; Deamidated [Q184; Q185]; Oxidation [M408]
FALSE	High	Master Protein	P13595	Ncam1	Isoform 2 of Neural cell adhesion molecule 1 [OS=Mus musculus]	0	159.476	29	20	66	20	848	93.5	4.91	128.21		5.01	19		1	0	High	High	1	0		0		0		Oxidation [M565; M611]; Carbamidomethyl [C41; C288]
FALSE	High	Master Protein	P13705	Msh3	DNA mismatch repair protein MSH3 [OS=Mus musculus]	0	9.331	3	2	2	2	1091	123	7.91	5.33			2			0	Not Found	High	1	0		0		0		Carbamidomethyl [C107; C108]
FALSE	High	Master Protein	P13864	Dnmt1	DNA (cytosine-5)-methyltransferase 1 [OS=Mus musculus]	0	203.91	30	43	103	43	1620	183.1	7.74	159.6	0		43	1		0	High	High	1	0		1	Deamidated [N460]	0		Carbamidomethyl [C62; C359; C362; C420; C426; C656; C659; C662; C667; C897; C900; C1342; C1501; C1597]; Deamidated [N460]
FALSE	High	Master Protein	P14069	S100a6	protein S100-A6 [OS=Mus musculus]	0	6.041	17	2	6	2	89	10	5.48	1.62			2			0	High	High	1	0		0		0		Oxidation [M57]
FALSE	High	Master Protein	P14115	Rpl27a	60S ribosomal protein L27a [OS=Mus musculus]	0	64.007	41	8	38	8	148	16.6	11.12	89.96			8			0	High	High	1	0		0		0		Carbamidomethyl [C70; C144]
FALSE	High	Master Protein	P14131	Rps16	40S ribosomal protein S16 [OS=Mus musculus]	0	93.987	60	14	94	14	146	16.4	10.21	200.53	6.51	2.67	13	1	1	0	High	High	1	0		1	Deamidated [N35]	0		Met-loss [N-Term]; Deamidated [N35]; Oxidation [M41]
FALSE	High	Master Protein	P14148	Rpl7	60S ribosomal protein L7 [OS=Mus musculus]	0	164.411	56	29	151	29	270	31.4	10.89	276.55	7.52	7.25	27	2	2	0	High	High	1	1	Acetyl [N-Term]	2	Deamidated [N141; N257]	0		Oxidation [M154]; Acetyl [N-Term]; Deamidated [N141; N257]
FALSE	High	Master Protein	P14152	Mdh1	Malate dehydrogenase, cytoplasmic [OS=Mus musculus]	0	119.939	43	14	57	14	334	36.5	6.58	128.75	7.42		14	1		0	High	High	1	0		1	Deamidated [N186]	0		Carbamidomethyl [C137; C154]; Deamidated [N186]
FALSE	High	Master Protein	P14206	Rpsa	40S ribosomal protein SA [OS=Mus musculus]	0	228.313	64	21	106	21	295	32.8	4.87	306.68		3.04	20		1	0	High	High	1	0		0		0		Carbamidomethyl [C148; C163]; Oxidation [M10; M34; M174; M177]; Met-loss+Acetyl [N-Term]
FALSE	High	Master Protein	P14211	Calr	Calreticulin [OS=Mus musculus]	0	553.915	73	38	382	38	416	48	4.49	823.97	12.79	31.49	34	3	3	0	High	High	1	0		3	Deamidated [Q119; N129; Q190]	0		Carbamidomethyl [C105; C137; C163]; Oxidation [M122; M131; M257]; Deamidated [Q119; N129; Q190]
FALSE	High	Master Protein	P14429	H2-Q7	H-2 class I histocompatibility antigen, Q7 alpha chain [OS=Mus musculus]	0	35.385	21	6	23	1	334	37.9	6.29	46.27			6			0	High	Not Found	1	0		0		0		Carbamidomethyl [C122]; Oxidation [M73]
FALSE	High	Master Protein	P14576	Srp54	signal recognition particle 54 kDa protein [OS=Mus musculus]	0	67.877	32	13	31	13	504	55.7	8.75	50.85			13			0	High	High	1	0		0		0		Carbamidomethyl [C133; C136]
FALSE	High	Master Protein	P14602	Hspb1	Heat shock protein beta-1 [OS=Mus musculus]	0	31.967	37	7	26	7	209	23	6.55	37.61			7			0	High	High	1	0		0		0
FALSE	High	Master Protein	P14685	Psmd3	26S proteasome non-ATPase regulatory subunit 3 [OS=Mus musculus]	0	193.723	49	30	105	30	530	60.7	8.44	204.43			30			0	High	High	1	0		0		0		Oxidation [M188; M405; M459]; Carbamidomethyl [C479]
FALSE	High	Master Protein	P14733	Lmnb1	Lamin-B1 [OS=Mus musculus]	0	10.562	5	4	6	2	588	66.7	5.16	6.04			4			0	Not Found	High	1	0		0		0
FALSE	High	Master Protein	P14824	Anxa6	annexin A6 [OS=Mus musculus]	0	530.821	74	60	215	60	673	75.8	5.5	470.78		11.97	57		3	0	High	High	1	0		0		0		Carbamidomethyl [C59; C96; C114; C358; C552]; Oxidation [M33; M90; M127; M242; M286; M304; M548; M662]
FALSE	High	Master Protein	P14869	Rplp0	60S acidic ribosomal protein P0 [OS=Mus musculus]	0	215.338	62	18	106	18	317	34.2	6.25	330.97			18			0	High	High	1	0		0		0		Carbamidomethyl [C27; C119; C226]; Oxidation [M101]
FALSE	High	Master Protein	P14873	Map1b	microtubule-associated protein 1B [OS=Mus musculus]	0	380.255	31	51	114	49	2464	270.1	4.83	248.45	18.58		48	4		0	High	High	1	0		2	Deamidated [Q1431; Q1811]	4	Phospho [S614; S1438; S1497; S1815]	Carbamidomethyl [C261; C262; C1224; C1305; C1913; C1936; C2000; C2037]; Phospho [S614; S1438; S1497; S1815]; Deamidated [Q1431; Q1811]; Met-loss+Acetyl [N-Term]; Oxidation [M1832]
FALSE	High	Master Protein	P14901	Hmox1	heme oxygenase 1 [OS=Mus musculus]	0	33.075	20	4	9	4	289	32.9	6.54	25.09			4			0	High	High	1	0		0		0
FALSE	High	Master Protein	P15116	Cdh2	Cadherin-2 [OS=Mus musculus]	0	41.301	13	7	9	7	906	99.7	4.78	21.42			7			0	High	High	1	0		0		0		Carbamidomethyl [C701; C703; C709]
FALSE	High	Master Protein	P15307	Rel	Proto-oncogene c-Rel [OS=Mus musculus]	0	8.098	5	3	8	2	587	64.9	6.54	1.65			3			0	Not Found	High	1	0		0		0
FALSE	High	Master Protein	P15327	Bpgm	Bisphosphoglycerate mutase [OS=Mus musculus]	0	6.648	8	2	2	2	259	30	7.06	1.85			2			0	High	High	1	0		0		0
FALSE	High	Master Protein	P15379	Cd44	CD44 antigen [OS=Mus musculus]	0	89.04	12	11	49	11	778	85.6	4.96	90.18	27.37	2.17	9	2	1	0	High	High	1	0		3	Deamidated [N41; N721; N724]	0		Carbamidomethyl [C760]; Deamidated [N41; N721; N724]; Oxidation [M761; M774]
FALSE	High	Master Protein	P15532	Nme1	Nucleoside diphosphate kinase A [OS=Mus musculus]	0	202.027	80	17	151	8	152	17.2	7.37	316.62		21.58	12		5	0	High	High	1	0		0		0		Carbamidomethyl [C109]; Oxidation [M68; M76; M90]
FALSE	High	Master Protein	P15535	B4galt1	Beta-1,4-galactosyltransferase 1 [OS=Mus musculus]	0	6.192	5	2	2	2	399	44.4	9.38	4.7			2			0	Not Found	High	1	0		0		0
FALSE	High	Master Protein	P15626	Gstm2	Glutathione S-transferase Mu 2 [OS=Mus musculus]	0	95.524	70	17	57	14	218	25.7	7.39	100.3			17			0	High	High	1	0		0		0		Carbamidomethyl [C115; C174]; Oxidation [M113; M212]; Met-loss [N-Term]
FALSE	High	Master Protein	P15864	H1-2	Histone H1.2 [OS=Mus musculus]	0	128.814	33	13	58	4	212	21.3	11	123.57	3.7		13	1		0	High	High	1	0		1	Deamidated [N76]	0		Deamidated [N76]; Met-loss+Acetyl [N-Term]
FALSE	High	Master Protein	P16045	Lgals1	Galectin-1 [OS=Mus musculus]	0	315.41	89	29	464	29	135	14.9	5.49	1029.2	76.92	101.69	13	3	16	0	High	High	1	0		7	Deamidated [N40; N41; N51; N57; N62; Q81; Q94]	0		Carbamidomethyl [C3; C17; C43; C61; C89]; Deamidated [N40; N41; N51; N57; N62; Q81; Q94]; Oxidation [N62; M115; M121]; Met-loss [N-Term]; Met-loss+Acetyl [N-Term]
FALSE	High	Master Protein	P16092	Fgfr1	Fibroblast growth factor receptor 1 [OS=Mus musculus]	0	5.377	2	2	5	1	822	91.9	6.34	6.97			2			0	High	Not Found	1	0		0		0		Carbamidomethyl [C603]
FALSE	High	Master Protein	P16110	Lgals3	Galectin-3 [OS=Mus musculus]	0	104.322	31	11	94	10	264	27.5	8.38	166.33		6.08	8		4	0	High	High	1	0		0		0		Oxidation [M144]
FALSE	High	Master Protein	P16125	Ldhb	L-lactate dehydrogenase B chain [OS=Mus musculus]	0	58.531	39	12	32	10	334	36.5	6.05	64.5			12			0	High	High	1	0		0		0		Carbamidomethyl [C164]
FALSE	High	Master Protein	P16254	Srp14	Signal recognition particle 14 kDa protein [OS=Mus musculus]	0	6.02	23	2	2	2	110	12.5	10.17	3.6			2			0	High	High	1	0		0		0		Met-loss [N-Term]
FALSE	High	Master Protein	P16330	Cnp	2',3'-cyclic-nucleotide 3'-phosphodiesterase [OS=Mus musculus]	0	16.001	11	5	8	5	420	47.1	8.97	6.29	3		5	1		0	High	High	1	0		1	Deamidated [Q359]	0		Deamidated [Q359]
FALSE	High	Master Protein	P16332	Mmut	Methylmalonyl-CoA mutase, mitochondrial [OS=Mus musculus]	0	51.665	17	10	20	10	748	82.8	6.89	33.73		2.4	9		1	0	High	High	1	0		0		0		Carbamidomethyl [C349; C558]
FALSE	High	Master Protein	P16460	Ass1	Argininosuccinate synthase [OS=Mus musculus]	0.001	4.22	3	2	3	2	412	46.6	8.22	0			2			0	High	High	1	0		0		0
FALSE	High	Master Protein	P16546	Sptan1	Spectrin alpha chain, non-erythrocytic 1 [OS=Mus musculus]	0	437.102	37	77	136	77	2472	284.4	5.33	293.49	5.14		77	1		0	High	High	1	0		1	Deamidated [N1257]	0		Carbamidomethyl [C1314; C1454; C1930; C2120; C2441]; Oxidation [M2304]; Deamidated [N1257]
FALSE	High	Master Protein	P16675	Ctsa	lysosomal protective protein [OS=Mus musculus]	0	101.431	31	14	56	14	474	53.8	5.86	115.1		9.49	13		1	0	High	High	1	0		0		0		Carbamidomethyl [C32; C235; C236; C241; C251; C438]; Oxidation [M371]
FALSE	High	Master Protein	P16858	Gapdh	glyceraldehyde-3-phosphate dehydrogenase [OS=Mus musculus]	0	840.693	85	57	680	57	333	35.8	8.25	1391.52	217.35	248.84	31	13	26	0	High	High	1	0		12	Deamidated [N62; N68; N134; N140; N147; N153; N203; N223; N237; Q278; N285; N287]	0		Deamidated [N62; N68; N134; N140; N147; N153; N203; N223; N237; Q278; N285; N287]; Carbamidomethyl [C150; C154; C245; C282]; Oxidation [M103; P127; M128; M131; N147; N153; M173; M229; D313; N314; M326; M329]; Met-loss [N-Term]
FALSE	High	Master Protein	P17047	Lamp2	Lysosome-associated membrane glycoprotein 2 [OS=Mus musculus]	0	59.056	18	8	35	8	415	45.7	7.39	86.16			8			0	High	High	1	0		0		0		Carbamidomethyl [C75; C149]
FALSE	High	Master Protein	P17095	Hmga1	Isoform HMG-Y of High mobility group protein HMG-I/HMG-Y [OS=Mus musculus]	0	19.159	34	3	6	3	96	10.6	10.32	14.83			3			0	High	High	1	0		0		0
FALSE	High	Master Protein	P17156	Hspa2	Heat shock-related 70 kDa protein 2 [OS=Mus musculus]	0	210.913	29	31	272	3	633	69.6	5.67	359.57	56.64	74.82	19	5	11	0	High	High	1	0		3	Deamidated [N32; N238; N358]	0		Deamidated [N32; N238; N358]; Oxidation [N437]; Carbamidomethyl [C606]
FALSE	High	Master Protein	P17182	Eno1	alpha-enolase [OS=Mus musculus]	0	692.334	83	59	664	47	434	47.1	6.8	1507.95	123.13	88.97	43	8	16	0	High	High	1	0		8	Deamidated [N70; N109; N151; N154; Q239; Q314; N363; Q392]	0		Carbamidomethyl [C119; C337; C339; C357; C389]; Deamidated [N70; N109; N151; N154; Q239; Q314; N363; Q392]; Oxidation [M94; M97; M165; M169; M368]
FALSE	High	Master Protein	P17183	Eno2	Gamma-enolase [OS=Mus musculus]	0	76.205	25	11	126	1	434	47.3	5.11	279.52	5.42	10.09	8	2	3	0	High	High	1	0		2	Deamidated [N109; Q392]	0		Carbamidomethyl [C119; C337; C339; C389]; Deamidated [N109; Q392]; Oxidation [M411]
FALSE	High	Master Protein	P17225	Ptbp1	Polypyrimidine tract-binding protein 1 [OS=Mus musculus]	0	161.404	34	14	74	11	527	56.4	8.34	184.44	9.85	2.57	13	2	1	0	High	High	1	1	Acetyl [N-Term]	1	Deamidated [N456]	0		Carbamidomethyl [C249; C250]; Acetyl [N-Term]; Oxidation [D2; M89]; Deamidated [N456]
FALSE	High	Master Protein	P17426	Ap2a1	AP-2 complex subunit alpha-1 [OS=Mus musculus]	0	104.267	26	22	45	16	977	107.6	7.03	83.73			22			0	High	High	1	0		0		0		Carbamidomethyl [C171; C267; C331; C354; C397; C492; C533; C941]
FALSE	High	Master Protein	P17427	Ap2a2	AP-2 complex subunit alpha-2 [OS=Mus musculus]	0	145.837	30	26	57	20	938	104	6.93	127.3			26			0	High	High	1	0		0		0		Carbamidomethyl [C171; C282; C330; C353; C491; C532; C902]; Oxidation [M737]
FALSE	High	Master Protein	P17439	Gba	glucosylceramidase [OS=Mus musculus]	0	41.441	20	9	21	9	515	57.6	7.75	28.59			9			0	High	High	1	0		0		0		Carbamidomethyl [C145]
FALSE	High	Master Protein	P17710	Hk1	Isoform HK1 of Hexokinase-1 [OS=Mus musculus]	0	269.448	47	46	180	42	918	102.2	6.8	330.19	5.72	3.02	45	1	1	0	High	High	1	0		0		0		Carbamidomethyl [C158; C368; C375; C606; C613; C628; C813; C834; C886]; Oxidation [M63; M296; M455; M495; M497; M744; M748]
FALSE	High	Master Protein	P17742	Ppia	peptidyl-prolyl cis-trans isomerase A [OS=Mus musculus]	0	344.11	82	28	362	26	164	18	7.9	669.72	141.15	91.41	14	3	14	0	High	High	1	1	Acetyl [N-Term]	5	Deamidated [N87; N102; N106; N108; Q111]	0		Carbamidomethyl [C62; C115; C161]; Oxidation [M61; M100; P105; M136; M142]; Deamidated [N87; N102; N106; N108; Q111]; Met-loss [N-Term]; Met-loss+Acetyl [N-Term]; Acetyl [N-Term]
FALSE	High	Master Protein	P17751	Tpi1	Triosephosphate isomerase [OS=Mus musculus]	0	357.086	77	32	345	32	299	32.2	5.74	698.91	54.88	89.1	22	3	10	0	High	High	1	0		3	Deamidated [N116; N122; N248]	0		Carbamidomethyl [C71; C77; C92; C117; C177; C268]; Deamidated [N116; N122; N248]; Oxidation [P131; M133]
FALSE	High	Master Protein	P17809	Slc2a1	Solute carrier family 2, facilitated glucose transporter member 1 [OS=Mus musculus]	0	28.834	11	5	22	5	492	53.9	8.87	46.45			5			0	High	High	1	0		0		0
FALSE	High	Master Protein	P17879	Hspa1b	Heat shock 70 kDa protein 1B [OS=Mus musculus]	0	211.797	49	33	155	20	642	70.1	5.72	273.33	12.04	30.9	26	3	6	0	High	High	1	0		4	Deamidated [N31; N141; N434; Q435]	0		Carbamidomethyl [C306; C603]; Deamidated [N31; N141; N434; Q435]
FALSE	High	Master Protein	P17918	Pcna	proliferating cell nuclear antigen [OS=Mus musculus]	0	195.419	72	21	147	21	261	28.8	4.77	270.96	12.08	2.12	19	2	1	0	High	High	1	0		2	Deamidated [N165; N177]	0		Carbamidomethyl [C62; C81; C135; C162]; Oxidation [M68; M75; M116; M119; M139]; Deamidated [N165; N177]
FALSE	High	Master Protein	P18155	Mthfd2	Bifunctional methylenetetrahydrofolate dehydrogenase/cyclohydrolase, mitochondrial [OS=Mus musculus]	0	59.38	23	6	16	6	350	37.8	8.88	44.21	4.69		6	1		0	High	High	1	0		1	Deamidated [N146]	0		Carbamidomethyl [C145]; Deamidated [N146]
FALSE	High	Master Protein	P18242	Ctsd	Cathepsin D [OS=Mus musculus]	0	118.731	34	14	47	14	410	44.9	7.15	105.52	2.65		14	1		0	High	High	1	0		1	Deamidated [Q310]	0		Carbamidomethyl [C117; C288; C327]; Oxidation [M324]; Deamidated [Q310]
FALSE	High	Master Protein	P18406	Ccn1	Protein CYR61 [OS=Mus musculus]	0	114.184	60	22	63	22	379	41.7	8.12	100.37	5.58	3.04	20	1	1	0	High	High	1	0		1	Deamidated [Q136]	0		Carbamidomethyl [C26; C30; C32; C39; C78; C100; C117; C121; C123; C130; C134; C145; C227; C237; C265; C270; C301; C312; C315; C320; C321; C335; C351; C353; C357]; Oxidation [M340; M346; M347]; Deamidated [Q136]
FALSE	High	Master Protein	P18572	Bsg	Isoform 2 of Basigin [OS=Mus musculus]	0	84.519	32	10	45	10	273	29.7	5.54	118.03		16.33	8		2	0	High	High	1	0		0		0		Carbamidomethyl [C87]
FALSE	High	Master Protein	P18653	Rps6ka1	Ribosomal protein S6 kinase alpha-1 [OS=Mus musculus]	0	86.608	32	19	53	10	724	81.5	8.1	56.42			19			0	High	High	1	0		0		0		Carbamidomethyl [C421; C541]
FALSE	High	Master Protein	P18654	Rps6ka3	Ribosomal protein S6 kinase alpha-3 [OS=Mus musculus]	0	121.89	36	22	66	13	740	83.6	6.89	110.01			22			0	High	High	1	0		0		0		Carbamidomethyl [C436]; Oxidation [M703]; Met-loss [N-Term]
FALSE	High	Master Protein	P18760	Cfl1	Cofilin-1 [OS=Mus musculus]	0	293.701	92	24	474	19	166	18.5	8.09	499.98	15.73	4.54	22	2	2	0	High	High	1	0		2	Deamidated [Q62; N138]	0		Carbamidomethyl [C39; C80; C139]; Deamidated [Q62; N138]; Met-loss+Acetyl [N-Term]; Oxidation [M18; M115]
FALSE	High	Master Protein	P18828	Sdc1	syndecan-1 [OS=Mus musculus]	0	42.227	16	5	13	5	311	32.9	4.79	31.2			5			0	High	High	1	0		0		0
FALSE	High	Master Protein	P18911	Rarg	Retinoic acid receptor gamma [OS=Mus musculus]	0	13.79	9	3	5	3	458	50.9	7.66	6.57			3			0	High	High	1	0		0		0		Carbamidomethyl [C90; C93; C107; C110; C205]
FALSE	High	Master Protein	P19096	Fasn	Fatty acid synthase [OS=Mus musculus]	0	847.98	46	101	446	101	2504	272.3	6.58	990.33	4.27	14.96	96	1	4	0	High	High	1	1	Acetyl [N-Term]	1	Deamidated [N306]	0		Oxidation [M201; M205; M329; M499; M511; M1124; M1162; M1496; M1570; M1594; M1972; M2034]; Carbamidomethyl [C135; C161; C180; C212; C223; C313; C496; C587; C593; C630; C779; C1010; C1128; C1142; C1222; C1397; C1464; C1557; C1590; C1821; C2461]; Acetyl [N-Term]; Deamidated [N306]
FALSE	High	Master Protein	P19157	Gstp1	Glutathione S-transferase P 1 [OS=Mus musculus]	0	204.542	59	13	72	13	210	23.6	7.87	159.35	62.98	2.75	12	2	1	0	High	High	1	0		6	Deamidated [N111; N114; N117; N201; N205; N207]	0		Deamidated [N111; N114; N117; N201; N205; N207]; Oxidation [M90; M92]; Met-loss [N-Term]; Carbamidomethyl [C48]
FALSE	High	Master Protein	P19182	Ifrd1	Interferon-related developmental regulator 1 [OS=Mus musculus]	0	11.552	9	3	7	3	449	49.9	7.18	13.23			3			0	High	High	1	0		0		0
FALSE	High	Master Protein	P19253	Rpl13a	60S ribosomal protein L13a [OS=Mus musculus]	0	66.506	43	13	114	13	203	23.4	11.02	245.09			13			0	High	High	1	0		0		0		Carbamidomethyl [C38]; Met-loss [N-Term]; Met-loss+Acetyl [N-Term]; Oxidation [M118]
FALSE	High	Master Protein	P19324	Serpinh1	Serpin H1 [OS=Mus musculus]	0	530.961	66	39	322	39	417	46.5	8.82	823.1	41.27	62.02	28	2	10	0	High	High	1	0		1	Deamidated [N201]	0		Oxidation [P29; M57; M203; M235; M236; M254; M257; M270]; Deamidated [N201]
FALSE	High	Master Protein	P19426	Nelfe	Negative elongation factor E [OS=Mus musculus]	0	43.099	23	6	10	6	375	42.5	9.38	17.97			6			0	High	High	1	0		0		0
FALSE	High	Master Protein	P19783	Cox4i1	Cytochrome c oxidase subunit 4 isoform 1, mitochondrial [OS=Mus musculus]	0	97.191	57	13	53	13	169	19.5	9.23	97.77			13			0	High	High	1	0		0		0		Oxidation [M54; M140]
FALSE	High	Master Protein	P20029	Hspa5	78 kDa glucose-regulated protein [OS=Mus musculus]	0	802.458	60	63	475	58	655	72.4	5.16	1230.33	38.15	46.62	52	6	10	0	High	High	1	0		6	Deamidated [N56; N91; N178; N381; N529; N564]	0		Oxidation [M149; M154; M197; M333; M542]; Deamidated [N56; N91; N178; N381; N529; N564]
FALSE	High	Master Protein	P20060	Hexb	Beta-hexosaminidase subunit beta [OS=Mus musculus]	0	37.905	16	8	16	8	536	61.1	8.12	24.67			8			0	High	High	1	0		0		0		Carbamidomethyl [C530]
FALSE	High	Master Protein	P20065	Tmsb4x	Isoform Short of Thymosin beta-4 [OS=Mus musculus]	0	15.703	39	2	5	2	44	5.1	5.06	15.46			2			0	High	High	1	0		0		0		Met-loss+Acetyl [N-Term]
FALSE	High	Master Protein	P20108	Prdx3	Thioredoxin-dependent peroxide reductase, mitochondrial [OS=Mus musculus]	0	60.73	43	11	43	11	257	28.1	7.58	60.95	2.96	26.38	9	1	2	0	High	High	1	0		1	Deamidated [N80]	0		Carbamidomethyl [C230]; Deamidated [N80]
FALSE	High	Master Protein	P20152	Vim	Vimentin [OS=Mus musculus]	0	119.67	49	22	41	21	466	53.7	5.12	84.26			22			0	High	High	1	0		0		0		Carbamidomethyl [C328]
FALSE	High	Master Protein	P20352	F3	tissue factor [OS=Mus musculus]	0	51.888	26	7	10	7	294	32.9	9.32	31.54			7			0	High	High	1	0		0		0		Carbamidomethyl [C241]
FALSE	High	Master Protein	P20357	Map2	microtubule-associated protein 2 [OS=Mus musculus]	0	16.675	3	4	8	4	1828	199	4.91	8.85			4			0	High	High	1	0		0		0
FALSE	High	Master Protein	P20444	Prkca	Protein kinase C alpha type [OS=Mus musculus]	0	69.506	25	15	33	10	672	76.8	7.14	50.1			15			0	High	High	1	0		0		0		Carbamidomethyl [C50; C53; C67; C70; C71; C132; C135; C383; C485; C569; C583]; Oxidation [M484]; Met-loss+Acetyl [N-Term]
FALSE	High	Master Protein	P20664	Prim1	DNA primase small subunit [OS=Mus musculus]	0	19.896	13	5	15	5	417	49.3	8.6	15.33			5			0	High	High	1	0		0		0		Carbamidomethyl [C167; C170]
FALSE	High	Master Protein	P21107	Tpm3	Tropomyosin alpha-3 chain [OS=Mus musculus]	0	144.602	47	17	52	1	285	33	4.72	130.61			17			0	High	High	1	0		0		0
FALSE	High	Master Protein	P21126	Ubl4a	Ubiquitin-like protein 4A [OS=Mus musculus]	0	21.583	39	6	12	6	157	17.8	8.44	20.06			6			0	High	High	1	0		0		0
FALSE	High	Master Protein	P21278	Gna11	guanine nucleotide-binding protein subunit alpha-11 [OS=Mus musculus]	0	51.834	36	11	22	6	359	42	5.97	42.72			11			0	High	High	1	0		0		0		Carbamidomethyl [C144; C330]
FALSE	High	Master Protein	P21279	Gnaq	Guanine nucleotide-binding protein G(Q) subunit alpha [OS=Mus musculus]	0	38.586	29	10	20	5	359	42.1	5.68	32.01			10			0	High	High	1	0		0		0		Carbamidomethyl [C144; C330]
FALSE	High	Master Protein	P21447	Abcb1a	Multidrug resistance protein 1A [OS=Mus musculus]	0	47.86	10	11	21	1	1276	140.6	8.85	22.15			11			0	High	Not Found	1	0		0		0		Carbamidomethyl [C427; C1070]; Oxidation [M874]
FALSE	High	Master Protein	P21460	Cst3	Cystatin-C [OS=Mus musculus]	0	30.05	43	5	9	5	140	15.5	9	16.93			5			0	High	High	1	0		0		0		Carbamidomethyl [C103; C117]
FALSE	High	Master Protein	P21550	Eno3	Beta-enolase [OS=Mus musculus]	0	316.155	69	36	263	23	434	47	7.18	581.53	63.03	27.15	29	4	7	0	High	High	1	0		5	Deamidated [N109; N151; N154; N363; Q392]	0		Carbamidomethyl [C119; C337; C339; C357; C389]; Deamidated [N109; N151; N154; N363; Q392]; Oxidation [M94; M165; M368; M411]
FALSE	High	Master Protein	P21956	Mfge8	Lactadherin [OS=Mus musculus]	0	48.941	25	10	24	10	463	51.2	6.52	33.03			10			0	High	High	1	0		0		0		Carbamidomethyl [C79]
FALSE	High	Master Protein	P21958	Tap1	Antigen peptide transporter 1 [OS=Mus musculus]	0	72.067	19	13	22	13	724	78.8	8.79	53.63			13			0	High	Not Found	1	0		0		0
FALSE	High	Master Protein	P21981	Tgm2	Protein-glutamine gamma-glutamyltransferase 2 [OS=Mus musculus]	0	43.924	17	9	13	9	686	77	5.1	24.77	4.01		8	1		0	High	High	1	0		1	Deamidated [N300]	0		Carbamidomethyl [C370; C371; C553]; Deamidated [N300]
FALSE	High	Master Protein	P21995	Emb	Embigin [OS=Mus musculus]	0	9.37	8	3	8	3	330	37	6.02	6.64			3			0	High	High	1	0		0		0		Carbamidomethyl [C145]
FALSE	High	Master Protein	P22315	Fech	Ferrochelatase, mitochondrial [OS=Mus musculus]	0	33.008	24	9	18	9	420	47.1	8.91	22.35			9			0	High	High	1	0		0		0
FALSE	High	Master Protein	P22366	Myd88	Myeloid differentiation primary response protein MyD88 [OS=Mus musculus]	0	9.013	9	3	5	3	296	33.7	5.52	7.74			3			0	High	High	1	0		0		0
FALSE	High	Master Protein	P22437	Ptgs1	Prostaglandin G/H synthase 1 [OS=Mus musculus]	0	41.294	23	13	31	12	602	69	6.83	38.06	0		12	1		0	High	High	1	0		1	Deamidated [Q329]	0		Carbamidomethyl [C59; C61; C161; C315; C571; C577]; Deamidated [Q329]
FALSE	High	Master Protein	P22682	Cbl	E3 ubiquitin-protein ligase CBL [OS=Mus musculus]	0	25.698	9	8	14	8	913	100.5	6.67	20.52			8			0	High	High	1	0		0		0
FALSE	High	Master Protein	P22777	Serpine1	Plasminogen activator inhibitor 1 [OS=Mus musculus]	0	31.024	18	8	24	8	402	45.1	6.64	40.76			8			0	High	High	1	0		0		0
FALSE	High	Master Protein	P22892	Ap1g1	AP-1 complex subunit gamma-1 [OS=Mus musculus]	0	41.931	16	14	29	14	822	91.3	6.8	29.09			14			0	High	High	1	0		0		0		Carbamidomethyl [C106; C392; C400; C539]
FALSE	High	Master Protein	P22907	Hmbs	porphobilinogen deaminase [OS=Mus musculus]	0	12.418	9	3	9	3	361	39.3	6.87	9.85			3			0	High	High	1	0		0		0		Carbamidomethyl [C120]
FALSE	High	Master Protein	P22935	Crabp2	Cellular retinoic acid-binding protein 2 [OS=Mus musculus]	0	35.127	46	6	19	5	138	15.7	5.71	39.07			6			0	High	High	1	0		0		0		Carbamidomethyl [C82]; Met-loss [N-Term]
FALSE	High	Master Protein	P23116	Eif3a	Eukaryotic translation initiation factor 3 subunit A [OS=Mus musculus]	0	366.395	46	72	260	72	1344	161.8	6.77	429.64			72			0	High	High	1	0		0		0		Oxidation [M228; M272; M514; M722; M736; M753; M1113]; Carbamidomethyl [C78; C160; C185]; Met-loss [N-Term]
FALSE	High	Master Protein	P23198	Cbx3	chromobox protein homolog 3 [OS=Mus musculus]	0	72.249	38	7	17	5	183	20.8	5.22	57.81			7			0	High	High	1	0		0		0		Carbamidomethyl [C160; C177]
FALSE	High	Master Protein	P23242	Gja1	Gap junction alpha-1 protein [OS=Mus musculus]	0	29.682	20	6	6	6	382	43	8.76	8.55			6			0	High	High	1	0		0		0		Carbamidomethyl [C54; C61; C65]; Met-loss [N-Term]
FALSE	High	Master Protein	P23249	Mov10	Putative helicase MOV-10 [OS=Mus musculus]	0	218.056	49	44	100	44	1004	113.5	9.01	185.39	4.9		44	1		0	High	High	1	0		1	Deamidated [N558]	0		Carbamidomethyl [C554; C565; C596; C597; C939; C948]; Deamidated [N558]
FALSE	High	Master Protein	P23475	Xrcc6	X-ray repair cross-complementing protein 6 [OS=Mus musculus]	0	33.081	12	7	19	7	608	69.4	6.79	33.07			7			0	High	High	1	0		0		0
FALSE	High	Master Protein	P23492	Pnp	purine nucleoside phosphorylase [OS=Mus musculus]	0	179.233	78	21	124	21	289	32.3	6.16	242.93	9.38	7.25	19	2	2	0	High	High	1	1	Acetyl [N-Term]	2	Deamidated [N74; Q188]	0		Oxidation [M80; M81; M170; M194; M211; M247; M258]; Carbamidomethyl [C31; C77; C78; C142]; Deamidated [N74; Q188]; Acetyl [N-Term]
FALSE	High	Master Protein	P23506	Pcmt1	protein-L-isoaspartate(D-aspartate) O-methyltransferase [OS=Mus musculus]	0	76.766	52	13	29	13	227	24.6	7.65	62.16			13			0	High	High	1	0		0		0		Carbamidomethyl [C95]
FALSE	High	Master Protein	P23591	Gfus	GDP-L-fucose synthase [OS=Mus musculus]	0	92.916	42	13	38	13	321	35.9	6.74	101.57			13			0	High	High	1	0		0		0		Carbamidomethyl [C112; C116; C309]
FALSE	High	Master Protein	P23708	Nfya	Nuclear transcription factor Y subunit alpha [OS=Mus musculus]	0	9.504	12	2	2	2	346	36.8	8.94	2.79			2			0	High	High	1	0		0		0
FALSE	High	Master Protein	P23780	Glb1	Beta-galactosidase [OS=Mus musculus]	0	58.45	24	13	26	13	647	73.1	7.47	45.72			13			0	High	High	1	0		0		0		Carbamidomethyl [C394; C427]
FALSE	High	Master Protein	P23949	Zfp36l2	mRNA decay activator protein ZFP36L2 [OS=Mus musculus]	0	30.21	16	5	11	5	484	50	8.24	18.87			5			0	High	High	1	0		0		0		Carbamidomethyl [C161; C170; C208]
FALSE	High	Master Protein	P24270	Cat	catalase [OS=Mus musculus]	0	226.594	56	25	78	25	527	59.8	7.88	185.97	4.36		25	1		0	High	High	1	0		1	Deamidated [N397]	0		Carbamidomethyl [C232; C377; C393; C425; C460]; Deamidated [N397]; Met-loss+Acetyl [N-Term]; Oxidation [M12; M519]
FALSE	High	Master Protein	P24288	Bcat1	Branched-chain-amino-acid aminotransferase, cytosolic [OS=Mus musculus]	0	87.297	31	11	43	11	386	42.8	5.39	100.36	6.17	3.57	10	1	1	0	High	High	1	0		1	Deamidated [N6]	0		Carbamidomethyl [C4; C8; C335; C338]; Deamidated [N6]; Oxidation [M349]
FALSE	High	Master Protein	P24369	Ppib	peptidyl-prolyl cis-trans isomerase B [OS=Mus musculus]	0	211.179	70	24	129	22	216	23.7	9.55	255.61	3.08	10.03	22	1	2	0	High	High	1	0		1	Deamidated [N148]	0		Oxidation [M101; M140; M176]; Deamidated [N148]
FALSE	High	Master Protein	P24452	Capg	Macrophage-capping protein [OS=Mus musculus]	0	126.567	44	11	53	11	352	39.2	7.2	117.52	14.52	8.67	10	3	1	0	High	High	1	1	Acetyl [N-Term]	1	Deamidated [Q209]	0		Deamidated [Q209]; Carbamidomethyl [C77]; Oxidation [P4; M107]; Acetyl [N-Term]
FALSE	High	Master Protein	P24527	Lta4h	leukotriene A-4 hydrolase [OS=Mus musculus]	0	237.267	55	31	94	31	611	69	6.42	190.66	6.6		31	1		0	High	High	1	0		0		0		Carbamidomethyl [C8; C17; C26; C136; C141; C147]; Met-loss [N-Term]; Oxidation [M521]
FALSE	High	Master Protein	P24547	Impdh2	inosine-5'-monophosphate dehydrogenase 2 [OS=Mus musculus]	0	367.233	59	37	175	33	514	55.8	7.28	445.3		3.99	35		2	0	High	High	1	0		0		0		Oxidation [M414; M420; M482; M483]; Carbamidomethyl [C95; C140; C246; C331; C339; C468]
FALSE	High	Master Protein	P24638	Acp2	Lysosomal acid phosphatase [OS=Mus musculus]	0	22.148	12	5	9	5	423	48.5	7.02	16.5			5			0	High	High	1	0		0		0		Carbamidomethyl [C345; C349]
FALSE	High	Master Protein	P24668	M6pr	Cation-dependent mannose-6-phosphate receptor [OS=Mus musculus]	0	53.089	26	7	34	7	278	31.2	5.39	64.97			7			0	High	High	1	0		0		0		Carbamidomethyl [C146]; Oxidation [M143; M278]
FALSE	High	Master Protein	P24788	Cdk11b	Cyclin-dependent kinase 11B [OS=Mus musculus]	0	10.451	4	4	6	4	784	91.5	5.39	1.95			4			0	High	High	1	0		0		0
FALSE	High	Master Protein	P24860	Ccnb1	G2/mitotic-specific cyclin-B1 [OS=Mus musculus]	0	10.729	8	3	3	3	430	48	7.43	4.34			3			0	High	High	1	0		0		0		Carbamidomethyl [C235; C389]
FALSE	High	Master Protein	P25206	Mcm3	DNA replication licensing factor mcm3 [OS=Mus musculus]	0	278.213	60	44	126	44	812	91.5	5.55	254.57	13.19		42	3		0	High	High	1	0		2	Deamidated [N331; Q536]	1	Phospho [S672]	Carbamidomethyl [C250; C263; C319; C360; C407; C446; C792]; Deamidated [N331; Q536]; Phospho [S672]; Met-loss+Acetyl [N-Term]; Oxidation [M562; M568]
FALSE	High	Master Protein	P25322	Ccnd1	G1/S-specific cyclin-D1 [OS=Mus musculus]	0	6.155	8	2	2	2	295	33.4	5.11	1.61			2			0	High	High	1	0		0		0		Carbamidomethyl [C38]
FALSE	High	Master Protein	P25444	Rps2	40S ribosomal protein S2 [OS=Mus musculus]	0	128.969	46	17	226	17	293	31.2	10.24	305.74		5.61	15		2	0	High	High	1	0		0		0		Carbamidomethyl [C182; C188; C222; C229]; Oxidation [M215; M216]
FALSE	High	Master Protein	P25785	Timp2	Metalloproteinase inhibitor 2 [OS=Mus musculus]	0	12.011	16	4	7	4	220	24.3	7.49	8.48			4			0	High	High	1	0		0		0		Carbamidomethyl [C201]
FALSE	High	Master Protein	P25799	Nfkb1	Nuclear factor NF-kappa-B p105 subunit [OS=Mus musculus]	0	64.876	12	9	27	9	971	105.5	5.39	69.69			9			0	High	High	1	0		0		0		Carbamidomethyl [C59; C116; C121; C159]
FALSE	High	Master Protein	P25976	Ubtf	Nucleolar transcription factor 1 [OS=Mus musculus]	0	14.952	5	3	4	3	765	89.5	5.76	8.14			3			0	High	High	1	0		0		0
FALSE	High	Master Protein	P26039	Tln1	Talin-1 [OS=Mus musculus]	0	1018.44	50	109	393	98	2541	269.7	6.18	1003.33	4.49		108	1		0	High	High	1	0		1	Deamidated [Q1479]	0		Oxidation [M17; M72; M289; M468; M899; M1084; M1596; M2121]; Carbamidomethyl [C29; C236; C243; C286; C732; C956; C1023; C1199; C1202; C1353; C1478; C1486; C1558; C1661; C1671; C1927; C1939; C1953; C2161; C2196; C2408; C2442]; Deamidated [Q1479]
FALSE	High	Master Protein	P26040	Ezr	Ezrin [OS=Mus musculus]	0	174.602	40	31	157	17	586	69.4	6.1	230.09	1.84	0	30	1	1	0	High	High	1	0		1	Deamidated [Q21]	0		Oxidation [M12; M305]; Deamidated [Q21]
FALSE	High	Master Protein	P26041	Msn	Moesin [OS=Mus musculus]	0	555.114	61	58	438	42	577	67.7	6.6	853.42	4.94	5.83	55	2	3	0	High	High	1	0		1	Deamidated [Q21]	0		Oxidation [M12; M182; M200; M285; M292; M305; M433; M451; M543; M549]; Carbamidomethyl [C284]; Deamidated [Q21]
FALSE	High	Master Protein	P26043	Rdx	radixin [OS=Mus musculus]	0	230.252	46	36	188	20	583	68.5	6.2	313.27	1.84	0	35	1	1	0	High	High	1	0		1	Deamidated [Q21]	0		Carbamidomethyl [C284]; Oxidation [M12; M285; M292; M305]; Deamidated [Q21]
FALSE	High	Master Protein	P26231	Ctnna1	Catenin alpha-1 [OS=Mus musculus]	0	157.525	35	24	43	24	906	100	6.23	100.06	4.35		23	1		0	High	High	1	0		1	Deamidated [N257]	0		Carbamidomethyl [C116; C228; C526; C767; C772]; Deamidated [N257]
FALSE	High	Master Protein	P26350	Ptma	Prothymosin alpha [OS=Mus musculus]	0	85.477	39	7	72	7	111	12.2	3.79	202.21	6.35		7	1		0	High	High	1	0		1	Deamidated [N29]	0		Deamidated [N29]; Met-loss+Acetyl [N-Term]
FALSE	High	Master Protein	P26369	U2af2	Splicing factor U2AF 65 kDa subunit [OS=Mus musculus]	0	73.665	25	10	32	10	475	53.5	9.09	62.94	3.1		9	1		0	High	High	1	0		1	Deamidated [N184]	0		Deamidated [N184]; Met-loss+Acetyl [N-Term]; Carbamidomethyl [C429; C464]
FALSE	High	Master Protein	P26443	Glud1	Glutamate dehydrogenase 1, mitochondrial [OS=Mus musculus]	0	377.31	57	37	199	37	558	61.3	8	439.57	32.54	36.1	33	2	4	0	High	High	1	0		1	Deamidated [N406]	0		Oxidation [M69; M168; M207; M226; M317; M468; M514]; Carbamidomethyl [C112; C172; C327; C376]; Deamidated [N406]
FALSE	High	Master Protein	P26450	Pik3r1	Phosphatidylinositol 3-kinase regulatory subunit alpha [OS=Mus musculus]	0	14.594	5	3	6	2	724	83.5	6.28	4.66			3			0	High	High	1	0		0		0		Carbamidomethyl [C498]
FALSE	High	Master Protein	P26516	Psmd7	26S proteasome non-ATPase regulatory subunit 7 [OS=Mus musculus]	0	116.139	46	15	46	15	321	36.5	6.77	104.57		2.18	14		1	0	High	High	1	0		0		0		Met-loss [N-Term]; Carbamidomethyl [C116]
FALSE	High	Master Protein	P26618	Pdgfra	Platelet-derived growth factor receptor alpha [OS=Mus musculus]	0	22.254	7	7	13	5	1089	122.6	5.15	17.34	2.88		6	1		0	High	High	1	0		1	Deamidated [Q323]	0		Deamidated [Q323]; Carbamidomethyl [C835]
FALSE	High	Master Protein	P26638	Sars1	Serine--tRNA ligase, cytoplasmic [OS=Mus musculus]	0	229.003	54	30	116	30	512	58.4	6.3	260.21		2.36	28		2	0	High	High	1	0		0		0		Carbamidomethyl [C162; C300; C395; C398; C431; C438]; Met-loss [N-Term]
FALSE	High	Master Protein	P26645	Marcks	Myristoylated alanine-rich C-kinase substrate [OS=Mus musculus]	0	147.034	62	12	36	12	309	29.6	4.34	109.78	11.82		12	3		0	High	High	1	0		2	Deamidated [N42; Q231]	1	Phospho [S138]	Phospho [S138]; Deamidated [N42; Q231]
FALSE	High	Master Protein	P26883	Fkbp1a	Peptidyl-prolyl cis-trans isomerase FKBP1A [OS=Mus musculus]	0	136.639	56	8	57	8	108	11.9	8.16	166.22			8			0	High	High	1	0		0		0		Carbamidomethyl [C23]; Oxidation [M30; M67]; Met-loss [N-Term]
FALSE	High	Master Protein	P27046	Man2a1	Alpha-mannosidase 2 [OS=Mus musculus]	0	171.578	32	32	76	32	1150	131.5	8.03	170.35			32			0	High	High	1	0		0		0		Carbamidomethyl [C115; C366; C367; C841; C921; C1081]
FALSE	High	Master Protein	P27048	Snrpb	small nuclear ribonucleoprotein-associated protein B [OS=Mus musculus]	0	12.095	16	4	8	4	231	23.6	10.9	4.93			4			0	High	High	1	0		0		0		Carbamidomethyl [C19; C43; C45]
FALSE	High	Master Protein	P27546	Map4	Microtubule-associated protein 4 [OS=Mus musculus]	0	343.526	43	36	162	36	1125	117.4	4.98	334.09	19.65	1.74	34	4	1	0	High	High	1	0		0		3	Phospho [S667; T759; S760]	Phospho [S667; T759; S760]; Oxidation [M516; P699; M712; M857]; Carbamidomethyl [C636]
FALSE	High	Master Protein	P27601	Gna13	Guanine nucleotide-binding protein subunit alpha-13 [OS=Mus musculus]	0	35.285	27	10	23	8	377	44	8.21	22.31			10			0	High	High	1	0		0		0		Carbamidomethyl [C329]
FALSE	High	Master Protein	P27612	Plaa	Phospholipase A-2-activating protein [OS=Mus musculus]	0	218.159	48	32	95	32	794	87.2	6.14	212.45			32			0	High	High	1	0		0		0		Carbamidomethyl [C12; C26; C27; C116; C193; C208; C631; C663; C665]
FALSE	High	Master Protein	P27641	Xrcc5	X-ray repair cross-complementing protein 5 [OS=Mus musculus]	0	80.075	24	15	33	15	732	83	5.16	59.59			15			0	High	High	1	0		0		0		Carbamidomethyl [C80; C235; C296; C339; C346]
FALSE	High	Master Protein	P27659	Rpl3	60S ribosomal protein L3 [OS=Mus musculus]	0	365.172	51	34	273	34	403	46.1	10.21	537.82	24.66	23.83	29	5	5	0	High	High	1	0		4	Deamidated [Q184; N186; N302; N328]	0		Carbamidomethyl [C114; C157; C253]; Oxidation [M181; M216; M389]; Deamidated [Q184; N186; N302; N328]
FALSE	High	Master Protein	P27773	Pdia3	Protein disulfide-isomerase A3 [OS=Mus musculus]	0	627.604	78	61	384	61	505	56.6	6.21	825.3	14	61.86	52	4	9	0	High	High	1	0		3	Deamidated [N88; N199; Q351]	0		Deamidated [N88; N199; Q351]; Carbamidomethyl [C85; C92; C244]; Oxidation [M247; M338; M434]
FALSE	High	Master Protein	P27808	Mgat1	alpha-1,3-mannosyl-glycoprotein 2-beta-N-acetylglucosaminyltransferase [OS=Mus musculus]	0	23.763	15	6	11	6	447	51.7	8.9	6.34			6			0	High	High	1	0		0		0
FALSE	High	Master Protein	P28063	Psmb8	Proteasome subunit beta type-8 [OS=Mus musculus]	0	88.061	45	11	23	11	276	30.2	6.68	52.3		1.63	10		1	0	High	High	1	0		0		0		Carbamidomethyl [C120; C124; C174]; Oxidation [M158; M165]
FALSE	High	Master Protein	P28076	Psmb9	Proteasome subunit beta type-9 [OS=Mus musculus]	0	5.05	9	2	4	2	219	23.4	5.22	4.35			2			0	High	Not Found	1	0		0		0
FALSE	High	Master Protein	P28271	Aco1	Cytoplasmic aconitate hydratase [OS=Mus musculus]	0	130.632	35	26	76	25	889	98.1	7.5	150.87			26			0	High	High	1	0		0		0		Carbamidomethyl [C50; C118; C165; C369; C370; C392]
FALSE	High	Master Protein	P28301	Lox	Protein-lysine 6-oxidase [OS=Mus musculus]	0	92.381	41	15	51	15	411	46.7	8.43	101.51		2.7	14		1	0	High	High	1	0		0		0		Carbamidomethyl [C232; C238; C318; C324; C406]; Oxidation [M225; M227]
FALSE	High	Master Protein	P28352	Apex1	DNA-(apurinic or apyrimidinic site) lyase [OS=Mus musculus]	0	161.3	52	16	46	16	317	35.5	7.91	145.31	3.22		15	1		0	High	High	1	0		1	Deamidated [Q237]	0		Carbamidomethyl [C64; C92; C207; C295]; Deamidated [Q237]
FALSE	High	Master Protein	P28474	Adh5	alcohol dehydrogenase class-3 [OS=Mus musculus]	0	132.756	37	17	70	15	374	39.5	7.25	165.27	1.76		17	1		0	High	High	1	0		1	Deamidated [N185]	0		Carbamidomethyl [C97; C100; C103; C170; C174; C240]; Oxidation [M336]; Deamidated [N185]
FALSE	High	Master Protein	P28481	Col2a1	Isoform 2 of Collagen alpha-1(II) chain [OS=Mus musculus]	0	7.519	3	2	2	1	1458	139	6.76	2.58			2			0	High	Not Found	1	0		0		0
FALSE	High	Master Protein	P28650	Adss1	Adenylosuccinate synthetase isozyme 1 [OS=Mus musculus]	0	7.052	4	2	3	1	457	50.2	8.43	3.99			2			0	Not Found	High	1	0		0		0
FALSE	High	Master Protein	P28653	Bgn	biglycan [OS=Mus musculus]	0	87.209	40	13	37	13	369	41.6	7.27	92.41			13			0	High	High	1	0		0		0		Carbamidomethyl [C77; C188; C322]
FALSE	High	Master Protein	P28656	Nap1l1	Nucleosome assembly protein 1-like 1 [OS=Mus musculus]	0	222.979	49	16	63	14	391	45.3	4.46	197.44		4.09	15		1	0	High	High	1	0		0		0		Carbamidomethyl [C132; C255; C258]; Met-loss+Acetyl [N-Term]; Oxidation [M184]
FALSE	High	Master Protein	P28658	Atxn10	Ataxin-10 [OS=Mus musculus]	0	137.292	51	22	66	22	475	53.7	5.25	133.51			22			0	High	High	1	0		0		0		Oxidation [M280; M366; M453]; Carbamidomethyl [C65; C92; C95; C134; C283; C382]
FALSE	High	Master Protein	P28659	Celf1	CUGBP Elav-like family member 1 [OS=Mus musculus]	0	88.93	21	10	29	10	486	52.1	8.46	74.92			10			0	High	High	1	1	Acetyl [N-Term]	0		0		Carbamidomethyl [C61; C62; C137; C177]; Oxidation [M168]; Acetyl [N-Term]
FALSE	High	Master Protein	P28660	Nckap1	Nck-associated protein 1 [OS=Mus musculus]	0	109.937	20	19	33	19	1128	128.7	6.62	66.11			19			0	High	High	1	0		0		0		Carbamidomethyl [C556; C599]
FALSE	High	Master Protein	P28667	Marcksl1	MARCKS-related protein [OS=Mus musculus]	0	90.434	64	8	22	8	200	20.2	4.61	64.35	20.49		7	4		0	High	High	1	0		4	Deamidated [Q29; N31; N52; Q177]	0		Deamidated [Q29; N31; N52; Q177]
FALSE	High	Master Protein	P28704	Rxrb	Retinoic acid receptor RXR-beta [OS=Mus musculus]	0	7.316	6	3	4	3	520	55.8	8.27	4.49			3			0	High	High	1	0		0		0		Carbamidomethyl [C209; C212]
FALSE	High	Master Protein	P28738	Kif5c	kinesin heavy chain isoform 5C [OS=Mus musculus]	0	28	7	6	26	1	956	109.2	6.19	28.36			6			0	High	Not Found	1	0		0		0		Carbamidomethyl [C296]
FALSE	High	Master Protein	P28740	Kif2a	Kinesin-like protein KIF2A [OS=Mus musculus]	0	132.959	36	22	60	2	705	79.7	6.73	138.05			22			0	High	High	1	0		0		0		Carbamidomethyl [C198; C224; C226; C308; C405; C419]; Oxidation [M305]; Met-loss+Acetyl [N-Term]
FALSE	High	Master Protein	P28741	Kif3a	kinesin-like protein KIF3A [OS=Mus musculus]	0	22.643	9	6	9	6	701	80.1	6.54	14.05			6			0	High	High	1	0		0		0
FALSE	High	Master Protein	P28798	Grn	Granulins [OS=Mus musculus]	0	118.787	35	14	39	14	589	63.4	6.8	72.64	2.6		14	1		0	High	High	1	0		1	Deamidated [Q325]	0		Carbamidomethyl [C92; C98; C99; C105; C163; C164; C170; C177; C207; C214; C220; C221; C282; C288; C294; C295; C304; C305; C312; C313; C319; C320; C326; C364; C442; C448; C454; C455; C464; C465; C472; C473; C479; C480; C486]; Deamidated [Q325]
FALSE	High	Master Protein	P28867	Prkcd	protein kinase C delta type [OS=Mus musculus]	0	92.043	27	20	46	19	674	77.5	7.39	92.71			20			0	High	High	1	0		0		0		Carbamidomethyl [C172; C175; C244; C247; C280; C342; C493]; Oxidation [M492]
FALSE	High	Master Protein	P29268	Ccn2	Connective tissue growth factor [OS=Mus musculus]	0	7.325	8	3	3	3	348	37.8	7.81	1.85			3			0	High	Not Found	1	0		0		0		Carbamidomethyl [C227; C283; C286]
FALSE	High	Master Protein	P29341	Pabpc1	Polyadenylate-binding protein 1 [OS=Mus musculus]	0	357.994	47	39	243	39	636	70.6	9.5	443.58	12.57	7.71	37	2	2	0	High	High	1	0		1	Deamidated [N252]	0		Oxidation [M72; M85; M158; M161; M202; M326; M383; M573]; Deamidated [N252]; Carbamidomethyl [C339]
FALSE	High	Master Protein	P29351	Ptpn6	tyrosine-protein phosphatase non-receptor type 6 [OS=Mus musculus]	0	12.177	5	3	5	3	595	67.5	7.81	10.02			3			0	Not Found	High	1	0		0		0
FALSE	High	Master Protein	P29387	Gnb4	Guanine nucleotide-binding protein subunit beta-4 [OS=Mus musculus]	0	50.042	27	8	39	3	340	37.4	6.16	75.66			8			0	High	High	1	0		0		0		Carbamidomethyl [C25; C148; C149; C204]; Met-loss+Acetyl [N-Term]
FALSE	High	Master Protein	P29391	Ftl1	Ferritin light chain 1 [OS=Mus musculus]	0	72.783	56	7	9	7	183	20.8	6	31.49			7			0	Not Found	High	1	0		0		0
FALSE	High	Master Protein	P29416	Hexa	Beta-hexosaminidase subunit alpha [OS=Mus musculus]	0	19.53	15	7	13	7	528	60.6	6.54	17.01			7			0	High	High	1	0		0		0
FALSE	High	Master Protein	P29477	Nos2	Nitric oxide synthase, inducible [OS=Mus musculus]	0	128.128	26	23	29	23	1144	130.5	7.72	53.34			23			0	High	High	1	0		0		0		Carbamidomethyl [C33; C211; C222; C675; C857; C938; C953; C1010]
FALSE	High	Master Protein	P29533	Vcam1	Vascular cell adhesion protein 1 [OS=Mus musculus]	0	136.747	33	24	53	24	739	81.3	5.3	97.24	5.52		24	1		0	High	High	1	0		1	Deamidated [N356]	0		Carbamidomethyl [C95; C99; C137; C483; C579; C668]; Oxidation [M169]; Deamidated [N356]
FALSE	High	Master Protein	P29594	Casp2	caspase-2 [OS=Mus musculus]	0	16.988	8	3	4	3	452	50.6	6.52	10.82			3			0	High	High	1	0		0		0		Carbamidomethyl [C305; C399]
FALSE	High	Master Protein	P29595	Nedd8	NEDD8 [OS=Mus musculus]	0	27.238	35	3	7	3	81	9	7.25	21.58			3			0	High	High	1	0		0		0
FALSE	High	Master Protein	P29758	Oat	Ornithine aminotransferase, mitochondrial [OS=Mus musculus]	0	235.608	57	28	138	28	439	48.3	6.62	301.98	2.54	3.81	26	1	2	0	High	High	1	0		1	Deamidated [N400]	0		Carbamidomethyl [C93; C150; C388]; Oxidation [M70; M139]; Deamidated [N400]
FALSE	High	Master Protein	P30285	Cdk4	Cyclin-dependent kinase 4 [OS=Mus musculus]	0	114.051	50	14	50	13	303	33.7	6.62	133.89			14			0	High	High	1	0		0		0		Carbamidomethyl [C78; C135; C215]; Oxidation [M75]
FALSE	High	Master Protein	P30412	Ppic	peptidyl-prolyl cis-trans isomerase C [OS=Mus musculus]	0	77.514	37	9	35	7	212	22.8	7.5	88.31		10.03	7		2	0	High	High	1	0		0		0		Oxidation [M95; M110]
FALSE	High	Master Protein	P30416	Fkbp4	Peptidyl-prolyl cis-trans isomerase FKBP4 [OS=Mus musculus]	0	559.896	72	46	288	46	458	51.5	5.72	669.83	45.36	13.46	44	2	2	0	High	High	1	0		2	Deamidated [N11; Q14]	0		Deamidated [N11; Q14]; Oxidation [M48; M97; M327; M414; M440]; Carbamidomethyl [C103; C107; C328; C342; C396]; Met-loss [N-Term]
FALSE	High	Master Protein	P30561	Ahr	Aryl hydrocarbon receptor [OS=Mus musculus]	0	12.394	5	4	8	4	848	95	6.47	12.24			4			0	High	High	1	0		0		0
FALSE	High	Master Protein	P30681	Hmgb2	High mobility group protein B2 [OS=Mus musculus]	0	330.59	66	24	181	18	210	24.1	7.31	546.72		15.11	22		2	0	High	High	1	0		0		0		Oxidation [M13; M132]; Carbamidomethyl [C23; C106]
FALSE	High	Master Protein	P30999	Ctnnd1	Catenin delta-1 [OS=Mus musculus]	0	298.699	48	39	104	2	938	104.9	6.87	233.69	5.79		38	1		0	High	High	1	0		1	Deamidated [Q154]	0		Carbamidomethyl [C394; C450; C533; C579; C581; C618; C692]; Deamidated [Q154]
FALSE	High	Master Protein	P31230	Aimp1	aminoacyl tRNA synthase complex-interacting multifunctional protein 1 [OS=Mus musculus]	0	211.87	80	20	73	20	310	34	8.35	195.98	7.73		20	1		0	High	High	1	0		0		0		Carbamidomethyl [C90; C159; C209; C227; C282]; Met-loss+Acetyl [N-Term]
FALSE	High	Master Protein	P31266	Rbpj	Recombining binding protein suppressor of hairless [OS=Mus musculus]	0	107.7	33	14	47	14	526	58.5	8.13	98.27			14			0	High	High	1	0		0		0		Carbamidomethyl [C94; C98; C206; C278; C312; C325; C339; C423; C429]; Oxidation [M283]
FALSE	High	Master Protein	P31324	Prkar2b	cAMP-dependent protein kinase type II-beta regulatory subunit [OS=Mus musculus]	0	158.897	43	17	47	14	416	46.1	4.98	118.21	13.12		17	1		0	High	High	1	0		0		1	Phospho [S112]	Carbamidomethyl [C114; C147; C371; C386]; Oxidation [M225]; Phospho [S112]
FALSE	High	Master Protein	P31750	Akt1	RAC-alpha serine/threonine-protein kinase [OS=Mus musculus]	0	104.535	44	18	48	13	480	55.7	5.9	72.99			18			0	High	High	1	0		0		0		Carbamidomethyl [C60; C77; C296; C310]
FALSE	High	Master Protein	P31786	Dbi	acyl-CoA-binding protein [OS=Mus musculus]	0	18.806	38	2	6	2	87	10	8.82	21.49			2			0	High	High	1	0		0		0		Met-loss+Acetyl [N-Term]
FALSE	High	Master Protein	P31938	Map2k1	Dual specificity mitogen-activated protein kinase kinase 1 [OS=Mus musculus]	0	109.635	41	15	88	9	393	43.4	6.7	137.89	7.28		15	1		0	High	High	1	0		1	Deamidated [N21]	0		Carbamidomethyl [C277]; Deamidated [N21]
FALSE	High	Master Protein	P32020	Scp2	Non-specific lipid-transfer protein [OS=Mus musculus]	0	46.928	11	9	25	9	547	59.1	7.44	51.65			9			0	High	High	1	0		0		0		Oxidation [M512; M533]
FALSE	High	Master Protein	P32067	Ssb	Lupus La protein homolog [OS=Mus musculus]	0	184.668	52	27	107	27	415	47.7	9.77	234.09			27			0	High	High	1	0		0		0		Carbamidomethyl [C18; C244]
FALSE	High	Master Protein	P32233	Drg1	developmentally-regulated GTP-binding protein 1 [OS=Mus musculus]	0	127.095	50	19	64	18	367	40.5	8.9	145.4			19			0	High	High	1	0		0		0		Carbamidomethyl [C195; C243; C322]; Oxidation [M15]
FALSE	High	Master Protein	P32507	Nectin2	Isoform Alpha of Nectin-2 [OS=Mus musculus]	0	24.17	13	5	6	5	467	50.7	5.48	18.67			5			0	High	High	1	0		0		0
FALSE	High	Master Protein	P32883	Kras	Isoform 2B of GTPase KRas [OS=Mus musculus]	0	36.072	53	7	20	3	188	21.5	8.12	40.71			7			0	High	High	1	0		0		0		Carbamidomethyl [C80]
FALSE	High	Master Protein	P32921	Wars1	Isoform 2 of Tryptophan--tRNA ligase, cytoplasmic [OS=Mus musculus]	0	103.243	48	18	43	18	475	53.6	7.08	75.52		10.41	17		1	0	High	High	1	0		0		0		Carbamidomethyl [C66; C229; C278; C309; C313]
FALSE	High	Master Protein	P33174	Kif4	Chromosome-associated kinesin KIF4 [OS=Mus musculus]	0	119.079	26	25	43	25	1231	139.4	6.68	65.31			25			0	High	High	1	0		0		0		Carbamidomethyl [C191; C270; C1106; C1110; C1112; C1223]
FALSE	High	Master Protein	P33215	Nedd1	Protein NEDD1 [OS=Mus musculus]	0	21.644	7	4	10	4	660	71.2	7.84	19.14			4			0	High	High	1	0		0		0
FALSE	High	Master Protein	P33609	Pola1	DNA polymerase alpha catalytic subunit [OS=Mus musculus]	0	131.84	22	29	47	29	1465	167.2	5.74	80.06			29			0	High	High	1	0		0		0		Carbamidomethyl [C501; C518; C596; C600; C1089; C1397; C1407]
FALSE	High	Master Protein	P33610	Prim2	DNA primase large subunit [OS=Mus musculus]	0	52.533	28	13	30	13	505	58.4	8.32	42.29			13			0	High	High	1	0		0		0		Carbamidomethyl [C111; C367; C384]
FALSE	High	Master Protein	P33611	Pola2	DNA polymerase alpha subunit B [OS=Mus musculus]	0	61.05	22	13	23	13	600	66.2	5.34	44.42			13			0	High	High	1	0		0		0
FALSE	High	Master Protein	P34022	Ranbp1	Ran-specific GTPase-activating protein [OS=Mus musculus]	0	117.374	64	11	36	11	203	23.6	5.22	107.1		3.47	10		1	0	High	High	1	0		0		0		Carbamidomethyl [C99; C132]; Oxidation [M108]
FALSE	High	Master Protein	P34152	Ptk2	Focal adhesion kinase 1 [OS=Mus musculus]	0	58.566	15	15	36	14	1090	123.5	6.68	55.79			15			0	High	High	1	0		0		0		Carbamidomethyl [C173; C597]; Met-loss+Acetyl [N-Term]
FALSE	High	Master Protein	P34884	Mif	Macrophage Migration inhibitory factor [OS=Mus musculus]	0	54.681	54	7	51	7	115	12.5	7.34	113.77		25.95	4		3	0	High	High	1	0		0		0		Carbamidomethyl [C57; C60; C81]; Met-loss [N-Term]; Oxidation [M3]
FALSE	High	Master Protein	P35123	Usp4	Ubiquitin carboxyl-terminal hydrolase 4 [OS=Mus musculus]	0	122.497	31	22	40	19	962	108.3	5.64	93			22			0	High	High	1	0		0		0		Carbamidomethyl [C143; C154; C461; C464; C624; C649; C758; C855; C926]
FALSE	High	Master Protein	P35235	Ptpn11	tyrosine-protein phosphatase non-receptor type 11 [OS=Mus musculus]	0	172.91	58	29	67	29	597	68.4	7.3	143.02	4.94		29	2		0	High	High	1	0		2	Deamidated [Q510; Q561]	0		Carbamidomethyl [C104; C259; C463; C490; C567; C573]; Deamidated [Q510; Q561]
FALSE	High	Master Protein	P35276	Rab3d	ras-related protein Rab-3D [OS=Mus musculus]	0	23.922	24	6	19	1	219	24.4	4.93	22.99			6			0	High	High	1	0		0		0		Carbamidomethyl [C137]
FALSE	High	Master Protein	P35278	Rab5c	Ras-related protein Rab-5C [OS=Mus musculus]	0	47.09	41	8	35	5	216	23.4	8.41	70.15			8			0	High	High	1	0		0		0		Oxidation [M89]
FALSE	High	Master Protein	P35279	Rab6a	Ras-related protein Rab-6A [OS=Mus musculus]	0	56.775	53	13	44	4	208	23.6	5.54	69.29			13			0	High	High	1	0		0		0		Met-loss+Acetyl [N-Term]; Oxidation [M55]
FALSE	High	Master Protein	P35282	Rab21	Ras-related protein Rab-21 [OS=Mus musculus]	0	85.892	45	9	44	9	222	24.1	7.94	102.74			9			0	High	High	1	0		0		0		Carbamidomethyl [C27; C175]; Met-loss+Acetyl [N-Term]; Oxidation [M178]
FALSE	High	Master Protein	P35283	Rab12	Ras-related protein Rab-12 [OS=Mus musculus]	0	39.936	49	12	27	11	243	27.3	8.41	42.19			12			0	High	High	1	1	Acetyl [N-Term]	0		0		Carbamidomethyl [C67; C70]; Acetyl [N-Term]
FALSE	High	Master Protein	P35285	Rab22a	Ras-related protein Rab-22A [OS=Mus musculus]	0	15.3	27	5	10	3	194	21.8	8.15	13.85			5			0	High	High	1	0		0		0		Carbamidomethyl [C9; C120]
FALSE	High	Master Protein	P35288	Rab23	Ras-related protein Rab-23 [OS=Mus musculus]	0	46.765	55	9	15	9	237	26.7	6.79	20.87	2.05	2.42	8	1	1	0	High	High	1	0		1	Deamidated [N17]	0		Carbamidomethyl [C130]; Deamidated [N17]
FALSE	High	Master Protein	P35293	Rab18	Ras-related protein Rab-18 [OS=Mus musculus]	0	65.007	50	10	23	10	206	23	5.36	67.39			10			0	High	High	1	1	Acetyl [N-Term]	0		0		Carbamidomethyl [C110; C155; C160]; Acetyl [N-Term]
FALSE	High	Master Protein	P35441	Thbs1	thrombospondin-1 [OS=Mus musculus]	0	224.124	30	33	88	32	1170	129.6	4.96	185.16	16.13		33	2		0	High	High	1	0		2	Deamidated [N321; N470]	0		Carbamidomethyl [C171; C318; C406; C413; C462; C474; C519; C531; C541; C562; C572; C575; C586; C599; C608; C617; C620; C663; C813]; Deamidated [N321; N470]; Oxidation [M469; M1132]
FALSE	High	Master Protein	P35486	Pdha1	Pyruvate dehydrogenase E1 component subunit alpha, somatic form, mitochondrial [OS=Mus musculus]	0	139.442	63	27	87	26	390	43.2	8.19	151.89	2.48	7.57	26	1	1	0	High	High	1	0		1	Deamidated [N164]	0		Carbamidomethyl [C41; C91; C94; C100; C101; C181; C218; C222; C261; C273]; Oxidation [M282; M318]; Deamidated [N164]
FALSE	High	Master Protein	P35487	Pdha2	Pyruvate dehydrogenase E1 component subunit alpha, testis-specific form, mitochondrial [OS=Mus musculus]	0	4.851	6	2	4	1	391	43.4	8.5	0		4.11	1		1	0	High	High	1	0		0		0
FALSE	High	Master Protein	P35505	Fah	Fumarylacetoacetase [OS=Mus musculus]	0	22.943	18	7	15	7	419	46.1	7.18	20.62			7			0	High	High	1	0		0		0		Carbamidomethyl [C408]
FALSE	High	Master Protein	P35550	Fbl	rRNA 2'-O-methyltransferase fibrillarin [OS=Mus musculus]	0	22.279	17	5	7	3	327	34.3	10.24	16.36			5			0	High	High	1	0		0		0
FALSE	High	Master Protein	P35564	Canx	Calnexin [OS=Mus musculus]	0	499.085	52	47	323	47	591	67.2	4.64	502.4	76.86	16.2	42	5	4	0	High	High	1	0		3	Deamidated [Q179; N453; Q551]	3	Phospho [S553; S563; S582]	Phospho [S553; S563; S582]; Carbamidomethyl [C195; C361; C367]; Oxidation [M110; M124; M189; M374; M388]; Deamidated [Q179; N453; Q551]
FALSE	High	Master Protein	P35569	Irs1	Insulin receptor substrate 1 [OS=Mus musculus]	0	11.497	5	4	5	4	1233	130.6	8.73	4.56			4			0	High	High	1	0		0		0		Carbamidomethyl [C1161]
FALSE	High	Master Protein	P35585	Ap1m1	AP-1 complex subunit mu-1 [OS=Mus musculus]	0	94.281	46	16	42	16	423	48.5	7.3	99.47			16			0	High	High	1	0		0		0
FALSE	High	Master Protein	P35601	Rfc1	Replication factor C subunit 1 [OS=Mus musculus]	0	93.111	18	15	28	15	1131	125.9	9.33	69.72			15			0	High	High	1	0		0		0		Carbamidomethyl [C591; C734; C736; C806; C900]
FALSE	High	Master Protein	P35700	Prdx1	peroxiredoxin-1 [OS=Mus musculus]	0	326.742	80	29	303	26	199	22.2	8.12	555.26	18.96	19.88	24	3	5	0	High	High	1	0		1	Deamidated [Q72]	0		Oxidation [M21; M100]; Carbamidomethyl [C71; C83; C173]; Deamidated [Q72]
FALSE	High	Master Protein	P35761	Ttk	Dual specificity protein kinase TTK [OS=Mus musculus]	0	24.704	9	6	8	6	856	96.2	8.19	13			6			0	High	High	1	0		0		0		Carbamidomethyl [C41; C410]
FALSE	High	Master Protein	P35762	Cd81	CD81 antigen [OS=Mus musculus]	0	82.161	31	5	19	5	236	25.8	5.83	68.4	3.92	6.43	4	1	1	0	High	High	1	0		1	Deamidated [N155]	0		Carbamidomethyl [C156; C157; C175; C190]; Oxidation [M136]; Deamidated [N155]
FALSE	High	Master Protein	P35821	Ptpn1	Tyrosine-protein phosphatase non-receptor type 1 [OS=Mus musculus]	0	70.278	33	12	32	12	432	49.6	6.16	69.58	5.43		12	1		0	High	High	1	0		1	Deamidated [Q382]	0		Carbamidomethyl [C32; C121]; Deamidated [Q382]
FALSE	High	Master Protein	P35822	Ptprk	Receptor-type tyrosine-protein phosphatase kappa [OS=Mus musculus]	0	121.992	19	21	44	21	1457	164.1	5.95	97.67			21			0	High	High	1	0		0		0		Carbamidomethyl [C441; C863; C1100; C1131; C1210; C1214; C1383; C1394]
FALSE	High	Master Protein	P35831	Ptpn12	Tyrosine-protein phosphatase non-receptor type 12 [OS=Mus musculus]	0	54.609	18	11	20	11	775	86.5	5.99	32.01			11			0	High	High	1	0		0		0		Carbamidomethyl [C228; C231; C235; C495; C498]
FALSE	High	Master Protein	P35922	Fmr1	synaptic functional regulator FMR1 [OS=Mus musculus]	0	60.36	19	10	41	7	614	68.9	7.62	53.97			10			0	High	High	1	0		0		0		Carbamidomethyl [C77; C78]
FALSE	High	Master Protein	P35951	Ldlr	Low-density lipoprotein receptor [OS=Mus musculus]	0	72.82	20	15	32	15	862	94.9	5.02	54.12			15			0	High	High	1	0		0		0		Carbamidomethyl [C303; C314; C319; C326; C330; C339; C341; C378; C380; C697; C699; C841]
FALSE	High	Master Protein	P35979	Rpl12	60S ribosomal protein L12 [OS=Mus musculus]	0	126.057	63	9	38	9	165	17.8	9.42	140.8	3.09		9	1		0	High	High	1	0		1	Deamidated [Q137]	0		Carbamidomethyl [C17; C141; C162]; Deamidated [Q137]
FALSE	High	Master Protein	P35980	Rpl18	60S ribosomal protein L18 [OS=Mus musculus]	0	96.3	44	14	109	14	188	21.6	11.78	198.7		2.6	13		1	0	High	High	1	0		0		0
FALSE	High	Master Protein	P36371	Tap2	antigen peptide transporter 2 [OS=Mus musculus]	0	59.412	21	12	19	12	702	77.4	7.24	33.38			12			0	High	Not Found	1	0		0		0
FALSE	High	Master Protein	P36536	Sar1a	GTP-binding protein SAR1a [OS=Mus musculus]	0	46.384	42	7	19	5	198	22.4	6.93	33.58			7			0	High	High	1	0		0		0		Carbamidomethyl [C178]
FALSE	High	Master Protein	P36552	Cpox	Oxygen-dependent coproporphyrinogen-III oxidase, mitochondrial [OS=Mus musculus]	0	139.489	44	20	55	20	443	49.7	8.53	140			20			0	High	High	1	0		0		0		Oxidation [M211]; Carbamidomethyl [C116; C181; C293; C308; C346; C362]
FALSE	High	Master Protein	P36916	Gnl1	Guanine nucleotide-binding protein-like 1 [OS=Mus musculus]	0	140.806	46	24	70	24	607	68.7	5.68	145.71	15.45		22	2		0	High	High	1	0		0		1	Phospho [S51]	Carbamidomethyl [C294; C365; C410; C412; C474; C479; C592; C607]; Phospho [S51]
FALSE	High	Master Protein	P36993	Ppm1b	Protein phosphatase 1B [OS=Mus musculus]	0	68.394	43	15	37	12	390	42.8	5.19	69.61			15			0	High	High	1	0		0		0		Carbamidomethyl [C71; C209]; Oxidation [M29]
FALSE	High	Master Protein	P37040	Por	NADPH--cytochrome P450 reductase [OS=Mus musculus]	0	216.49	44	37	148	37	678	77	5.53	231.87		6.56	36		1	0	High	High	1	0		0		0		Oxidation [M184; M511]; Carbamidomethyl [C363; C472; C566]
FALSE	High	Master Protein	P37804	Tagln	transgelin [OS=Mus musculus]	0	209.867	84	21	96	21	201	22.6	8.81	226.52		2.45	20		1	0	High	High	1	0		0		0		Oxidation [M10; M86; M91; M123; M131; M153; M179; M190]; Carbamidomethyl [C38]; Met-loss+Acetyl [N-Term]
FALSE	High	Master Protein	P37889	Fbln2	Fibulin-2 [OS=Mus musculus]	0	137.484	22	21	63	21	1221	131.7	4.68	142.28	4.22		21	1		0	High	High	1	0		1	Deamidated [Q384]	0		Carbamidomethyl [C97; C99; C156; C469; C470; C479; C508; C509; C511; C512; C619; C621; C773; C782; C827; C906; C912; C936; C942; C1093; C1110; C1116]; Deamidated [Q384]
FALSE	High	Master Protein	P37913	Lig1	DNA ligase 1 [OS=Mus musculus]	0	170.541	39	28	77	28	916	102.2	6.81	162.34	3.52		28	1		0	High	High	1	0		0		1	Phospho [S51]	Carbamidomethyl [C66; C278; C407; C506; C717; C844]; Phospho [S51]
FALSE	High	Master Protein	P38060	Hmgcl	Hydroxymethylglutaryl-CoA lyase, mitochondrial [OS=Mus musculus]	0	24.095	20	6	11	6	325	34.2	8.41	19.04			6			0	High	High	1	0		0		0		Carbamidomethyl [C141; C170; C174]
FALSE	High	Master Protein	P38585	Ttl	Tubulin--tyrosine ligase [OS=Mus musculus]	0	12.215	10	3	5	3	377	43.1	6.46	7.22			3			0	High	High	1	0		0		0
FALSE	High	Master Protein	P38647	Hspa9	Stress-70 protein, mitochondrial [OS=Mus musculus]	0	534.724	51	50	358	47	679	73.4	6.07	698.18	36.03	14.12	45	4	5	0	High	High	1	0		2	Deamidated [N149; N268]	0		Oxidation [M172; M174; M303; M370; M561; M584; M596; M650]; Deamidated [N149; N268]; Carbamidomethyl [C608]
FALSE	High	Master Protein	P39053	Dnm1	Dynamin-1 [OS=Mus musculus]	0	91.058	23	19	39	10	867	97.7	7.74	57.46			19			0	High	High	1	0		0		0
FALSE	High	Master Protein	P39054	Dnm2	Dynamin-2 [OS=Mus musculus]	0	112.309	30	25	51	16	870	98.1	7.43	74.79			25			0	High	High	1	0		0		0		Carbamidomethyl [C86]
FALSE	High	Master Protein	P39098	Man1a2	mannosyl-oligosaccharide 1,2-alpha-mannosidase IB [OS=Mus musculus]	0	5.517	3	2	5	2	641	72.8	8.28	1.78			2			0	High	High	1	0		0		0
FALSE	High	Master Protein	P39429	Traf2	TNF receptor-associated factor 2 [OS=Mus musculus]	0	13.235	7	2	3	2	501	56	6.96	8.71			2			0	High	High	1	0		0		0		Carbamidomethyl [C223]
FALSE	High	Master Protein	P39447	Tjp1	Tight junction protein ZO-1 [OS=Mus musculus]	0	100.9	15	18	32	18	1745	194.6	6.64	52.31			18			0	High	High	1	0		0		0		Carbamidomethyl [C1697]
FALSE	High	Master Protein	P39749	Fen1	Flap endonuclease 1 [OS=Mus musculus]	0	60.203	30	10	26	10	378	42.3	8.34	57.06	3.86		10	1		0	High	High	1	0		1	Deamidated [Q110]	0		Carbamidomethyl [C161]; Deamidated [Q110]
FALSE	High	Master Protein	P39876	Timp3	Metalloproteinase inhibitor 3 [OS=Mus musculus]	0	25.234	32	6	18	6	211	24.2	8.76	27.55			6			0	High	High	1	0		0		0		Carbamidomethyl [C91; C118; C150; C155; C192]
FALSE	High	Master Protein	P40124	Cap1	adenylyl cyclase-associated protein 1 [OS=Mus musculus]	0	329.816	60	28	166	26	474	51.5	7.52	375.83	7.67		28	2		0	High	High	1	0		1	Deamidated [Q91]	1	Phospho [S309]	Carbamidomethyl [C29; C92; C355; C374; C415; C426]; Deamidated [Q91]; Oxidation [M27; M74; M156; M161; M436]; Met-loss+Acetyl [N-Term]; Phospho [S309]
FALSE	High	Master Protein	P40142	Tkt	Transketolase [OS=Mus musculus]	0	572.699	76	48	334	48	623	67.6	7.5	855.79	6.14	26.3	40	1	8	0	High	High	1	1	Acetyl [N-Term]	1	Deamidated [N484]	0		Carbamidomethyl [C41; C133; C206; C225; C362; C376; C386; C413; C417]; Met-loss [N-Term]; Acetyl [N-Term]; Oxidation [M135; M303; M442; M604]; Deamidated [N484]
FALSE	High	Master Protein	P40201	Chd1	Chromodomain-helicase-DNA-binding protein 1 [OS=Mus musculus]	0	36.438	8	9	14	9	1711	196.3	7.37	15.21			9			0	High	High	1	0		0		0		Carbamidomethyl [C1461]
FALSE	High	Master Protein	P40237	Cd82	CD82 antigen [OS=Mus musculus]	0	8.951	12	3	5	3	266	29.6	5.02	0			3			0	High	High	1	0		0		0		Oxidation [M117]; Carbamidomethyl [C174; C176]
FALSE	High	Master Protein	P40240	Cd9	CD9 antigen [OS=Mus musculus]	0	67.787	31	6	20	6	226	25.2	7.23	56.8	4.97	2.23	5	1	1	0	High	High	1	0		1	Deamidated [Q159]	0		Carbamidomethyl [C150; C151; C165; C179]; Oxidation [M146]; Deamidated [Q159]
FALSE	High	Master Protein	P40336	Vps26a	Vacuolar protein sorting-associated protein 26A [OS=Mus musculus]	0	97.595	48	12	35	11	327	38.1	6.57	84.2			12			0	High	High	1	0		0		0		Oxidation [M261]
FALSE	High	Master Protein	P41105	Rpl28	60S ribosomal protein L28 [OS=Mus musculus]	0	83.398	49	12	112	12	137	15.7	12.02	228.86	8.45		12	1		0	High	High	1	0		1	Deamidated [N30]	0		Met-loss+Acetyl [N-Term]; Oxidation [M8]; Carbamidomethyl [C13]; Deamidated [N30]
FALSE	High	Master Protein	P41216	Acsl1	Long-chain-fatty-acid--CoA ligase 1 [OS=Mus musculus]	0	68.111	26	17	39	15	699	77.9	7.15	57.84			17			0	High	High	1	1	Acetyl [N-Term]	0		0		Carbamidomethyl [C109; C298; C626]; Acetyl [N-Term]
FALSE	High	Master Protein	P41230	Kdm5c	Lysine-specific demethylase 5C [OS=Mus musculus]	0	8.079	2	2	2	2	1554	175.2	5.44	0			2			0	Not Found	High	1	0		0		0		Carbamidomethyl [C1280]
FALSE	High	Master Protein	P41241	Csk	tyrosine-protein kinase CSK [OS=Mus musculus]	0	43.784	26	11	26	11	450	50.7	7.06	40.74			11			0	High	High	1	0		0		0		Carbamidomethyl [C31]
FALSE	High	Master Protein	P41731	Cd63	CD63 antigen [OS=Mus musculus]	0	25.635	16	4	25	4	238	25.7	6.98	52.94			4			0	High	High	1	0		0		0		Carbamidomethyl [C191]; Oxidation [M123]
FALSE	High	Master Protein	P42125	Eci1	Enoyl-CoA delta isomerase 1, mitochondrial [OS=Mus musculus]	0	75.698	33	8	34	8	289	32.2	8.98	75.92			8			0	High	High	1	0		0		0		Oxidation [M47; M179]
FALSE	High	Master Protein	P42128	Foxk1	Forkhead box protein K1 [OS=Mus musculus]	0	42.706	16	11	27	11	719	74.9	9.17	47.55	2.13		11	1		0	High	High	1	0		1	Deamidated [Q356]	0		Met-loss+Acetyl [N-Term]; Deamidated [Q356]
FALSE	High	Master Protein	P42208	Septin2	septin-2 [OS=Mus musculus]	0	193.568	69	22	87	22	361	41.5	6.55	177.26	11.18	6.2	20	2	1	0	High	High	1	0		0		1	Phospho [S218]	Oxidation [M316; M332; M335]; Carbamidomethyl [C111; C114; C148; C149]; Phospho [S218]
FALSE	High	Master Protein	P42225	Stat1	signal transducer and activator of transcription 1 [OS=Mus musculus]	0	208.242	34	26	54	26	749	87.1	5.58	126.29	3.21		26	1		0	High	High	1	0		1	Deamidated [N622]	0		Carbamidomethyl [C155]; Oxidation [M521; M654; M691]; Deamidated [N622]
FALSE	High	Master Protein	P42227	Stat3	Signal transducer and activator of transcription 3 [OS=Mus musculus]	0	155.816	36	23	56	1	770	88	6.3	124.95	5.54		22	2		0	High	High	1	0		2	Deamidated [N189; Q248]	0		Carbamidomethyl [C108; C251; C259; C542; C687]; Met-loss+Acetyl [N-Term]; Deamidated [N189; Q248]
FALSE	High	Master Protein	P42230	Stat5a	Signal transducer and activator of transcription 5A [OS=Mus musculus]	0	97.723	25	20	33	6	793	90.8	6.39	67.87			20			0	High	High	1	0		0		0		Carbamidomethyl [C101]
FALSE	High	Master Protein	P42232	Stat5b	Signal transducer and activator of transcription 5B [OS=Mus musculus]	0	91.329	25	18	30	4	786	89.9	6.05	62.48			18			0	High	High	1	0		0		0		Carbamidomethyl [C101; C688]
FALSE	High	Master Protein	P42337	Pik3ca	Phosphatidylinositol 4,5-bisphosphate 3-kinase catalytic subunit alpha isoform [OS=Mus musculus]	0	29.01	7	6	11	6	1068	124.3	7.15	19.27			6			0	High	High	1	0		0		0		Carbamidomethyl [C215; C276; C368]
FALSE	High	Master Protein	P42567	Eps15	epidermal growth factor receptor substrate 15 [OS=Mus musculus]	0	4.646	2	2	4	2	897	98.4	4.6	6.66			2			0	High	High	1	0		0		0
FALSE	High	Master Protein	P42669	Pura	Transcriptional activator protein Pur-alpha [OS=Mus musculus]	0	25.697	19	6	16	5	321	34.9	6.44	24.63			6			0	High	High	1	0		0		0
FALSE	High	Master Protein	P42859	Htt	huntingtin [OS=Mus musculus]	0	4.555	1	2	3	2	3119	344.5	6.29	0			2			0	High	High	1	0		0		0		Carbamidomethyl [C922]
FALSE	High	Master Protein	P42932	Cct8	T-complex protein 1 subunit theta [OS=Mus musculus]	0	433.589	71	42	271	42	548	59.5	5.62	640.55	9.91	7.26	39	2	3	0	High	High	1	0		1	Deamidated [N50]	0		Carbamidomethyl [C136; C148; C149; C244; C430]; Oxidation [M221; M249; M266; M276; M311; M385; M492; M526]; Deamidated [N50]
FALSE	High	Master Protein	P43024	Cox6a1	Cytochrome c oxidase subunit 6A1, mitochondrial [OS=Mus musculus]	0	7.824	42	3	5	3	111	12.3	9.98	6.9			3			0	High	High	1	0		0		0
FALSE	High	Master Protein	P43247	Msh2	DNA mismatch repair protein MSH2 [OS=Mus musculus]	0	133.021	30	27	70	27	935	104.1	5.96	128.47			27			0	High	High	1	0		0		0		Carbamidomethyl [C199; C404; C822]; Oxidation [M210]
FALSE	High	Master Protein	P43274	H1-4	Histone H1.4 [OS=Mus musculus]	0	109.411	28	12	40	5	219	22	11.11	86.6	3.7		12	1		0	High	High	1	0		1	Deamidated [N76]	0		Deamidated [N76]; Met-loss+Acetyl [N-Term]
FALSE	High	Master Protein	P43276	H1-5	Histone H1.5 [OS=Mus musculus]	0	35.722	24	5	24	5	223	22.6	10.92	43.85			5			0	High	High	1	0		0		0		Met-loss+Acetyl [N-Term]
FALSE	High	Master Protein	P43277	H1-3	Histone H1.3 [OS=Mus musculus]	0	92.339	26	10	51	1	221	22.1	11.03	104.85	3.7		10	1		0	High	High	1	0		1	Deamidated [N77]	0		Deamidated [N77]; Met-loss+Acetyl [N-Term]
FALSE	High	Master Protein	P43346	Dck	deoxycytidine kinase [OS=Mus musculus]	0	28.546	23	6	14	6	260	30.3	5.43	35.18			6			0	High	High	1	0		0		0
FALSE	High	Master Protein	P43406	Itgav	Integrin alpha-V [OS=Mus musculus]	0	239.418	43	39	129	39	1044	115.3	5.63	260.67	4.2		39	1		0	High	High	1	0		1	Deamidated [N1037]	0		Carbamidomethyl [C97; C138; C158; C172; C491; C502; C565; C626; C632; C711; C900; C905; C910]; Deamidated [N1037]; Oxidation [M717; M737]
FALSE	High	Master Protein	P43883	Plin2	perilipin-2 [OS=Mus musculus]	0	78.743	36	11	24	11	425	46.6	6.87	60.05			11			0	High	High	1	0		0		0		Carbamidomethyl [C84; C300]; Met-loss+Acetyl [N-Term]
FALSE	High	Master Protein	P45376	Akr1b1	aldose reductase [OS=Mus musculus]	0	132.13	60	19	87	18	316	35.7	7.18	165.39			19			0	High	High	1	0		0		0		Carbamidomethyl [C45; C81; C187; C200; C299; C304]; Met-loss+Acetyl [N-Term]; Oxidation [M302]
FALSE	High	Master Protein	P45377	Akr1b8	Aldose reductase-related protein 2 [OS=Mus musculus]	0	99.199	53	16	56	15	316	36.1	6.37	105.24			16			0	High	High	1	0		0		0		Carbamidomethyl [C45; C50; C83; C187]; Met-loss+Acetyl [N-Term]
FALSE	High	Master Protein	P45481	Crebbp	CREB-binding protein [OS=Mus musculus]	0	23.732	3	7	13	2	2441	265.3	8.54	16.77			7			0	High	High	1	0		0		0		Carbamidomethyl [C1708; C1711; C1827; C1828]
FALSE	High	Master Protein	P45591	Cfl2	Cofilin-2 [OS=Mus musculus]	0	93.473	66	13	314	8	166	18.7	7.88	108.03			13			0	High	High	1	0		0		0		Carbamidomethyl [C39; C80]; Met-loss+Acetyl [N-Term]; Oxidation [M18; M115]
FALSE	High	Master Protein	P45878	Fkbp2	Peptidyl-prolyl cis-trans isomerase FKBP2 [OS=Mus musculus]	0	29.559	29	5	14	5	140	15.3	8.88	38.14			5			0	High	High	1	0		0		0		Carbamidomethyl [C95]
FALSE	High	Master Protein	P45952	Acadm	medium-chain specific acyl-CoA dehydrogenase, mitochondrial [OS=Mus musculus]	0	84.086	36	14	51	14	421	46.5	8.37	97.18	5.32		14	1		0	High	High	1	0		1	Deamidated [N186]	0		Deamidated [N186]; Oxidation [M274]; Carbamidomethyl [C156; C159]
FALSE	High	Master Protein	P46061	Rangap1	Ran GTPase-activating protein 1 [OS=Mus musculus]	0	102.507	37	21	47	21	589	63.5	4.68	64.63			21			0	High	High	1	0		0		0		Carbamidomethyl [C82; C141; C152; C169; C274; C303; C506]
FALSE	High	Master Protein	P46460	Nsf	Vesicle-fusing ATPase [OS=Mus musculus]	0	119.995	34	27	52	27	744	82.6	6.95	96.12			27			0	High	High	1	0		0		0		Carbamidomethyl [C59; C599]
FALSE	High	Master Protein	P46467	Vps4b	Vacuolar protein sorting-associated protein 4B [OS=Mus musculus]	0	51.111	23	8	27	5	444	49.4	7.11	48.15			8			0	High	High	1	0		0		0		Carbamidomethyl [C240]
FALSE	High	Master Protein	P46471	Psmc2	26S proteasome regulatory subunit 7 [OS=Mus musculus]	0	200.276	67	32	116	32	433	48.6	5.95	201.74		2.62	31		1	0	High	High	1	0		0		0		Carbamidomethyl [C180; C236; C377; C389]; Met-loss [N-Term]
FALSE	High	Master Protein	P46638	Rab11b	Ras-related protein Rab-11B [OS=Mus musculus]	0	68.368	60	13	48	13	218	24.5	5.94	84.05			13			0	High	High	1	0		0		0		Met-loss+Acetyl [N-Term]
FALSE	High	Master Protein	P46656	Fdx1	Adrenodoxin, mitochondrial [OS=Mus musculus]	0	7.513	9	2	5	2	188	20.1	5.62	4.27			2			0	High	High	1	0		0		0
FALSE	High	Master Protein	P46664	Adss2	adenylosuccinate synthetase isozyme 2 [OS=Mus musculus]	0	164.983	48	19	56	18	456	50	6.38	150.34			19			0	High	High	1	0		0		0		Carbamidomethyl [C18; C58; C182; C338]; Oxidation [M181]; Met-loss+Acetyl [N-Term]
FALSE	High	Master Protein	P46718	Pdcd2	Programmed cell death protein 2 [OS=Mus musculus]	0	33.6	27	7	17	7	343	38.3	5.38	30.38			7			0	High	High	1	0		0		0		Carbamidomethyl [C51; C83; C84; C137; C139; C145]
FALSE	High	Master Protein	P46735	Myo1b	Unconventional myosin-Ib [OS=Mus musculus]	0	140.789	30	28	57	28	1107	128.5	9.26	118.79			28			0	High	High	1	0		0		0		Carbamidomethyl [C103; C483; C613; C641]
FALSE	High	Master Protein	P46737	Brcc3	Lys-63-specific deubiquitinase BRCC36 [OS=Mus musculus]	0	32.691	27	7	9	7	291	33.3	5.83	13.62			7			0	High	High	1	0		0		0		Carbamidomethyl [C203; C215]
FALSE	High	Master Protein	P46935	Nedd4	E3 ubiquitin-protein ligase NEDD4 [OS=Mus musculus]	0	436.262	50	49	188	45	887	102.6	5.26	480.52	2.5	6.13	48	1	1	0	High	High	1	0		1	Deamidated [N823]	0		Oxidation [M111; M294; M438; M532; M801]; Carbamidomethyl [C365; C614]; Deamidated [N823]
FALSE	High	Master Protein	P46938	Yap1	Transcriptional coactivator YAP1 [OS=Mus musculus]	0	96.71	52	14	35	14	488	52.4	5.11	78.01	8.52		13	2		0	High	High	1	1	Acetyl [N-Term]	0		3	Phospho [S94; T99; S113]	Phospho [S94; T99; S113]; Carbamidomethyl [C328]; Acetyl [N-Term]
FALSE	High	Master Protein	P46978	Stt3a	Dolichyl-diphosphooligosaccharide--protein glycosyltransferase subunit STT3A [OS=Mus musculus]	0	101.439	25	21	100	19	705	80.5	8.1	156.44			21			0	High	High	1	0		0		0		Carbamidomethyl [C637]; Oxidation [M599; M639]
FALSE	High	Master Protein	P47199	Cryz	Quinone oxidoreductase [OS=Mus musculus]	0	72.16	42	9	21	9	331	35.2	8.07	74.75			9			0	High	High	1	0		0		0		Carbamidomethyl [C45; C137; C166]
FALSE	High	Master Protein	P47226	Tes	Testin [OS=Mus musculus]	0	234.685	55	27	99	27	423	48	8.31	208.42		6.91	25		2	0	High	High	1	0		0		0		Carbamidomethyl [C169; C238; C240; C241; C303; C306; C329; C330; C333; C351; C354; C363; C366; C414; C418]; Oxidation [M97; M132; M180; M406]
FALSE	High	Master Protein	P47713	Pla2g4a	Cytosolic phospholipase A2 [OS=Mus musculus]	0	211.565	44	31	99	31	748	85.2	5.43	172.87	11.73	2.27	30	1	1	0	High	High	1	0		0		1	Phospho [S437]	Oxidation [M148; M209; M363; M417]; Carbamidomethyl [C151; C619; C725]; Phospho [S437]; Met-loss+Acetyl [N-Term]
FALSE	High	Master Protein	P47738	Aldh2	Aldehyde dehydrogenase, mitochondrial [OS=Mus musculus]	0	263.774	61	30	138	30	519	56.5	7.62	342.29		4.06	29		1	0	High	High	1	0		0		0		Carbamidomethyl [C38; C68; C388]; Oxidation [M210]
FALSE	High	Master Protein	P47739	Aldh3a1	Aldehyde dehydrogenase, dimeric NADP-preferring [OS=Mus musculus]	0	27.74	12	5	9	3	453	50.4	6.95	13.58			5			0	High	High	1	0		0		0		Carbamidomethyl [C223; C229]
FALSE	High	Master Protein	P47740	Aldh3a2	Fatty aldehyde dehydrogenase [OS=Mus musculus]	0	61.074	33	13	24	11	484	53.9	8.35	42.44			13			0	High	High	1	0		0		0		Carbamidomethyl [C214; C220; C226; C237; C241; C249; C425]
FALSE	High	Master Protein	P47753	Capza1	F-actin-capping protein subunit alpha-1 [OS=Mus musculus]	0	153.556	76	18	82	14	286	32.9	5.55	157.08	7.71		18	2		0	High	High	1	0		1	Deamidated [N138]	0		Carbamidomethyl [C124; C141; C157]; Deamidated [N138]; Met-loss+Acetyl [N-Term]
FALSE	High	Master Protein	P47754	Capza2	F-actin-capping protein subunit alpha-2 [OS=Mus musculus]	0	152.152	81	19	70	15	286	32.9	5.85	166.73	11.96		17	3		0	High	High	1	0		4	Deamidated [Q56; Q61; N138; Q240]	0		Carbamidomethyl [C141; C157]; Deamidated [Q56; Q61; N138; Q240]; Met-loss+Acetyl [N-Term]
FALSE	High	Master Protein	P47757	Capzb	F-actin-capping protein subunit beta [OS=Mus musculus]	0	249.911	65	24	142	1	277	31.3	5.74	358.15	15.84	1.75	23	2	1	0	Not Found	High	1	0		1	Deamidated [N77]	0		Carbamidomethyl [C8; C62; C147; C206]; Oxidation [M13; M88; M187; M197; M220]; Met-loss+Acetyl [N-Term]; Deamidated [N77]
FALSE	High	Master Protein	P47758	Srprb	signal recognition particle receptor subunit beta [OS=Mus musculus]	0	106.032	56	15	40	15	269	29.6	9.28	103.45			15			0	High	High	1	0		0		0		Carbamidomethyl [C177; C244]
FALSE	High	Master Protein	P47791	Gsr	Glutathione reductase, mitochondrial [OS=Mus musculus]	0	109.492	38	14	33	14	500	53.6	7.99	99	3.33		13	1		0	High	High	1	0		1	Deamidated [N165]	0		Carbamidomethyl [C80; C85; C256; C355]; Oxidation [M428]; Deamidated [N165]
FALSE	High	Master Protein	P47802	Mtx1	Metaxin-1 [OS=Mus musculus]	0	22.218	20	5	9	5	317	35.6	6.18	12.97			5			0	High	High	1	0		0		0
FALSE	High	Master Protein	P47809	Map2k4	Dual specificity mitogen-activated protein kinase kinase 4 [OS=Mus musculus]	0	48.2	31	10	19	10	397	44.1	8.07	36.65			10			0	High	High	1	0		0		0		Carbamidomethyl [C244; C264; C377; C380]
FALSE	High	Master Protein	P47811	Mapk14	Mitogen-activated protein kinase 14 [OS=Mus musculus]	0	53.179	34	12	26	11	360	41.3	5.88	51.89			12			0	High	High	1	0		0		0		Carbamidomethyl [C162]; Met-loss+Acetyl [N-Term]
FALSE	High	Master Protein	P47856	Gfpt1	glutamine--fructose-6-phosphate aminotransferase [isomerizing] 1 [OS=Mus musculus]	0	213.451	48	30	89	24	697	78.5	6.84	214.83	0		30	1		0	High	High	1	0		0		1	Phospho [S259]	Carbamidomethyl [C55; C262; C476; C568; C618; C636]; Oxidation [M356; M539]; Phospho [S259]
FALSE	High	Master Protein	P47857	Pfkm	ATP-dependent 6-phosphofructokinase, muscle type [OS=Mus musculus]	0	205.05	42	29	84	23	780	85.2	8	170.68	2.11	4.47	28	1	1	0	High	High	1	0		1	Deamidated [Q28]	0		Deamidated [Q28]; Oxidation [M349; M684]; Carbamidomethyl [C114; C351; C709]
FALSE	High	Master Protein	P47879	Igfbp4	insulin-like growth factor-binding protein 4 [OS=Mus musculus]	0	14.721	17	4	5	4	254	27.8	7.17	8.45			4			0	Not Found	High	1	0		0		0		Carbamidomethyl [C170; C245]
FALSE	High	Master Protein	P47911	Rpl6	60S ribosomal protein L6 [OS=Mus musculus]	0	151.798	41	20	116	20	296	33.5	10.7	245.3	11.05	15.36	18	1	2	0	High	High	1	0		1	Deamidated [N287]	0		Deamidated [N287]; Oxidation [M289]
FALSE	High	Master Protein	P47915	Rpl29	60S ribosomal protein L29 [OS=Mus musculus]	0	26.963	33	6	48	6	160	17.6	11.84	80.31			6			0	High	High	1	0		0		0
FALSE	High	Master Protein	P47941	Crkl	Crk-like protein [OS=Mus musculus]	0	57.19	50	10	17	10	303	33.8	6.74	44.7			10			0	High	High	1	0		0		0		Carbamidomethyl [C44]
FALSE	High	Master Protein	P47955	Rplp1	60S acidic ribosomal protein P1 [OS=Mus musculus]	0	22.673	52	2	4	2	114	11.5	4.32	20.5			2			0	High	High	1	0		0		0		Carbamidomethyl [C61]
FALSE	High	Master Protein	P47962	Rpl5	60S ribosomal protein L5 [OS=Mus musculus]	0	334.423	69	32	292	32	297	34.4	9.77	483.19		22.72	26		6	0	High	High	1	0		0		0		Carbamidomethyl [C62; C76; C100; C144]; Oxidation [M73; M200; M208; M212; M235; M236; M239]
FALSE	High	Master Protein	P47963	Rpl13	60S ribosomal protein L13 [OS=Mus musculus]	0	109.651	51	14	86	14	211	24.3	11.55	149.31	11.22	11.29	12	1	2	0	High	High	1	0		1	Deamidated [N6]	0		Oxidation [M8; M155]; Deamidated [N6]
FALSE	High	Master Protein	P47964	Rpl36	60S ribosomal protein L36 [OS=Mus musculus]	0	28.25	27	5	26	5	105	12.2	11.34	49.28			5			0	High	High	1	0		0		0		Carbamidomethyl [C48]; Met-loss [N-Term]; Oxidation [M7]
FALSE	High	Master Protein	P48024	Eif1	eukaryotic translation initiation factor 1 [OS=Mus musculus]	0	40.622	65	5	11	5	113	12.7	7.44	26.15			5			0	High	High	1	0		0		0		Carbamidomethyl [C69]; Met-loss+Acetyl [N-Term]
FALSE	High	Master Protein	P48025	Syk	Tyrosine-protein kinase SYK [OS=Mus musculus]	0	39.786	14	7	8	7	629	71.3	7.88	18.3			7			0	Not Found	High	1	0		0		0		Carbamidomethyl [C205]
FALSE	High	Master Protein	P48036	Anxa5	annexin A5 [OS=Mus musculus]	0	277.743	63	31	194	31	319	35.7	4.96	372.38	7.38	12.33	30	1	1	0	High	High	1	0		1	Deamidated [N134]	0		Carbamidomethyl [C314]; Oxidation [M82; M83; M297]; Deamidated [N134]
FALSE	High	Master Protein	P48193	Epb41	protein 4.1 [OS=Mus musculus]	0	34.218	7	5	24	2	858	95.9	5.6	39.13			5			0	Not Found	High	1	0		0		0		Carbamidomethyl [C481]
FALSE	High	Master Protein	P48428	Tbca	Tubulin-specific chaperone A [OS=Mus musculus]	0	13.381	34	4	9	4	108	12.8	5.27	14.86			4			0	High	High	1	0		0		0		Carbamidomethyl [C67]
FALSE	High	Master Protein	P48453	Ppp3cb	serine/threonine-protein phosphatase 2B catalytic subunit beta isoform [OS=Mus musculus]	0	29.639	13	6	11	4	525	59.1	5.91	18.91			6			0	High	High	1	0		0		0		Carbamidomethyl [C478]
FALSE	High	Master Protein	P48678	Lmna	Prelamin-A/C [OS=Mus musculus]	0	355.083	66	49	179	47	665	74.2	6.98	456.98	10.83		49	2		0	High	High	1	1	Acetyl [N-Term]	1	Deamidated [N473]	1	Phospho [S22]	Carbamidomethyl [C522; C572; C590; C593]; Oxidation [M371; M464; M479; M540]; Acetyl [N-Term]; Deamidated [N473]; Phospho [S22]
FALSE	High	Master Protein	P48722	Hspa4l	Heat shock 70 kDa protein 4L [OS=Mus musculus]	0	221.264	45	33	106	28	838	94.3	5.74	219.92			33			0	High	High	1	0		0		0		Carbamidomethyl [C34; C38; C140; C167; C310; C376; C380; C417; C540]; Oxidation [M607; M609]
FALSE	High	Master Protein	P48758	Cbr1	Carbonyl reductase [NADPH] 1 [OS=Mus musculus]	0	45.725	47	11	24	10	277	30.6	8.31	43.51		2.26	10		1	0	High	High	1	0		0		0		Carbamidomethyl [C226; C227]; Met-loss+Acetyl [N-Term]
FALSE	High	Master Protein	P48759	Ptx3	Pentraxin-related protein PTX3 [OS=Mus musculus]	0	15.458	16	5	10	5	381	41.8	5.38	16.33			5			0	High	High	1	0		0		0		Carbamidomethyl [C103]
FALSE	High	Master Protein	P48774	Gstm5	Glutathione S-transferase Mu 5 [OS=Mus musculus]	0	38.321	33	9	21	8	224	26.6	7.21	30.4			9			0	High	High	1	0		0		0		Carbamidomethyl [C38; C177]
FALSE	High	Master Protein	P48962	Slc25a4	ADP/ATP translocase 1 [OS=Mus musculus]	0	242.656	64	30	322	16	298	32.9	9.72	404.43	2.54	16.67	27	1	3	0	High	High	1	0		1	Deamidated [N155]	0		Carbamidomethyl [C57; C160; C257]; Deamidated [N155]; Oxidation [M201; M238; M239; M240; M250; M282]; Met-loss+Acetyl [N-Term]
FALSE	High	Master Protein	P49025	Cit	Citron Rho-interacting kinase [OS=Mus musculus]	0.001	3.833	1	2	4	2	2055	235.2	6.54	0			2			0	High	High	1	0		0		0
FALSE	High	Master Protein	P49135	Ercc3	TFIIH basal transcription factor complex helicase XPB subunit [OS=Mus musculus]	0	4.879	2	2	2	2	783	89.1	7.18	0			2			0	Not Found	High	1	0		0		0
FALSE	High	Master Protein	P49138	Mapkapk2	MAP kinase-activated protein kinase 2 [OS=Mus musculus]	0	48.65	25	8	14	6	386	44	8.57	32.61			8			0	High	High	1	0		0		0
FALSE	High	Master Protein	P49282	Slc11a2	Isoform 3 of Natural resistance-associated macrophage protein 2 [OS=Mus musculus]	0	14.125	7	3	5	3	591	64.5	6.61	7.73			3			0	High	High	1	0		0		0		Carbamidomethyl [C167; C275; C278]
FALSE	High	Master Protein	P49312	Hnrnpa1	Heterogeneous nuclear ribonucleoprotein A1 [OS=Mus musculus]	0	180.439	59	21	93	20	320	34.2	9.23	206.3	2.83	5.18	20	1	1	0	High	High	1	0		1	Deamidated [N171]	0		Met-loss+Acetyl [N-Term]; Carbamidomethyl [C43; C175]; Oxidation [M46]; Deamidated [N171]
FALSE	High	Master Protein	P49442	Inpp1	Inositol polyphosphate 1-phosphatase [OS=Mus musculus]	0	29.043	15	4	7	4	396	43.3	5.01	17.75			4			0	High	High	1	0		0		0		Carbamidomethyl [C277; C315]
FALSE	High	Master Protein	P49443	Ppm1a	Protein phosphatase 1A [OS=Mus musculus]	0	87.795	37	11	33	8	382	42.4	5.36	74.06			11			0	High	High	1	0		0		0		Carbamidomethyl [C71; C72; C144]; Oxidation [M29]
FALSE	High	Master Protein	P49586	Pcyt1a	choline-phosphate cytidylyltransferase A [OS=Mus musculus]	0	57.92	41	12	28	7	367	41.6	7.03	53.25			12			0	High	High	1	0		0		0		Carbamidomethyl [C68]
FALSE	High	Master Protein	P49615	Cdk5	Cyclin-dependent-like kinase 5 [OS=Mus musculus]	0	37.698	34	9	21	8	292	33.3	7.66	38.71			9			0	High	High	1	0		0		0		Carbamidomethyl [C94]
FALSE	High	Master Protein	P49717	Mcm4	DNA replication licensing factor MCM4 [OS=Mus musculus]	0	216.449	38	30	90	30	862	96.7	7.2	225.63		6.08	28		2	0	High	High	1	0		0		0		Carbamidomethyl [C161; C325; C327; C330]
FALSE	High	Master Protein	P49718	Mcm5	DNA replication licensing factor mcm5 [OS=Mus musculus]	0	235.166	51	41	141	41	733	82.3	8.43	276.22	2.78	2.44	40	1	1	0	High	High	1	0		0		0		Carbamidomethyl [C206; C218; C248; C354; C396; C481; C565]; Oxidation [M240; M244; M346; M348; M378; M506]
FALSE	High	Master Protein	P49722	Psma2	Proteasome subunit alpha type-2 [OS=Mus musculus]	0	105.294	55	13	69	13	234	25.9	7.43	147.31	3.06	3.42	12	1	1	0	High	High	1	0		1	Deamidated [N42]	0		Deamidated [N42]; Oxidation [M79]
FALSE	High	Master Protein	P49817	Cav1	Caveolin-1 [OS=Mus musculus]	0	35.542	40	7	17	2	178	20.5	6.02	33.91			7			0	High	High	1	0		0		0
FALSE	High	Master Protein	P50096	Impdh1	Inosine-5'-monophosphate dehydrogenase 1 [OS=Mus musculus]	0	57.267	34	16	49	12	514	55.2	6.8	70.23	0	3.7	13	1	2	0	High	High	1	0		1	Deamidated [Q498]	0		Carbamidomethyl [C95; C246; C468]; Deamidated [Q498]
FALSE	High	Master Protein	P50136	Bckdha	2-oxoisovalerate dehydrogenase subunit alpha, mitochondrial [OS=Mus musculus]	0	14.321	7	3	6	3	442	50.3	8.06	4.48			3			0	High	High	1	0		0		0
FALSE	High	Master Protein	P50171	Hsd17b8	estradiol 17-beta-dehydrogenase 8 [OS=Mus musculus]	0	9.465	10	2	4	2	259	26.6	6.54	2.63			2			0	High	High	1	0		0		0
FALSE	High	Master Protein	P50247	Ahcy	Adenosylhomocysteinase [OS=Mus musculus]	0	262.596	58	28	166	27	432	47.7	6.54	371.69			28			0	High	High	1	0		0		0		Oxidation [M29; M33; M38; M167; M168; M210]; Carbamidomethyl [C79; C113; C195]; Met-loss+Acetyl [N-Term]
FALSE	High	Master Protein	P50295	Nat2	arylamine N-acetyltransferase 2 [OS=Mus musculus]	0	24.846	22	5	6	5	290	33.7	5.88	11.59			5			0	High	High	1	0		0		0		Carbamidomethyl [C223; C233]
FALSE	High	Master Protein	P50396	Gdi1	Rab GDP dissociation inhibitor alpha [OS=Mus musculus]	0	267.001	62	27	100	19	447	50.5	5.08	265.13		6.03	26		1	0	High	High	1	0		0		0		Carbamidomethyl [C202; C282; C302; C317; C335]; Oxidation [M66; M82; M168; M424; M434]
FALSE	High	Master Protein	P50428	Arsa	arylsulfatase A [OS=Mus musculus]	0	13.861	5	2	5	2	506	53.7	5.87	5.43	1.91		2	1		0	High	High	1	0		1	Deamidated [Q464]	0		Deamidated [Q464]
FALSE	High	Master Protein	P50429	Arsb	arylsulfatase B [OS=Mus musculus]	0	40.442	15	8	23	8	534	59.6	7.24	47.72			8			0	High	High	1	0		0		0
FALSE	High	Master Protein	P50431	Shmt1	Serine hydroxymethyltransferase, cytosolic [OS=Mus musculus]	0	129.772	45	19	51	19	478	52.6	6.95	133.45	2.37		19	1		0	High	High	1	0		1	Deamidated [N64]	0		Oxidation [M164; M260]; Carbamidomethyl [C62; C90; C198; C329; C374; C378]; Deamidated [N64]; Met-loss+Acetyl [N-Term]
FALSE	High	Master Protein	P50516	Atp6v1a	V-type proton ATPase catalytic subunit A [OS=Mus musculus]	0	134.447	38	21	70	21	617	68.3	5.58	129.54	3.88	6.93	19	1	1	0	High	High	1	0		1	Deamidated [Q242]	0		Carbamidomethyl [C240; C254; C277; C532]; Oxidation [M318; M368]; Deamidated [Q242]
FALSE	High	Master Protein	P50518	Atp6v1e1	V-type proton ATPase subunit E 1 [OS=Mus musculus]	0	11.473	15	3	6	3	226	26.1	8.43	9.65			3			0	High	High	1	0		0		0		Met-loss+Acetyl [N-Term]
FALSE	High	Master Protein	P50543	S100a11	protein S100-A11 [OS=Mus musculus]	0	9.832	18	2	11	2	98	11.1	5.45	15.6			2			0	High	High	1	0		0		0		Carbamidomethyl [C8]
FALSE	High	Master Protein	P50544	Acadvl	Very long-chain specific acyl-CoA dehydrogenase, mitochondrial [OS=Mus musculus]	0	140.021	42	27	70	27	656	70.8	8.75	127.22			27			0	High	High	1	0		0		0		Carbamidomethyl [C238; C423]
FALSE	High	Master Protein	P50580	Pa2g4	proliferation-associated protein 2G4 [OS=Mus musculus]	0	300.443	66	30	193	30	394	43.7	6.86	401.1	12.9	7.72	27	4	3	0	High	High	1	0		5	Deamidated [N83; N161; N163; N328; N390]	0		Carbamidomethyl [C85; C87; C149; C179; C296]; Oxidation [M55; M57; M276; M291; M326; M331; M347]; Deamidated [N83; N161; N163; N328; N390]; Met-loss+Acetyl [N-Term]
FALSE	High	Master Protein	P51125	Cast	Calpastatin [OS=Mus musculus]	0	288.787	55	33	130	33	788	84.9	5.52	306.87	11.81	2.21	32	1	1	0	High	High	1	0		0		1	Phospho [S219]	Carbamidomethyl [C322; C408; C491; C736]; Phospho [S219]; Met-loss+Acetyl [N-Term]
FALSE	High	Master Protein	P51141	Dvl1	Segment polarity protein dishevelled homolog DVL-1 [OS=Mus musculus]	0	11.019	6	4	8	1	695	75.3	7.02	1.7			4			0	Not Found	High	1	0		0		0		Carbamidomethyl [C72]
FALSE	High	Master Protein	P51150	Rab7a	ras-related protein Rab-7a [OS=Mus musculus]	0	195.072	84	21	105	21	207	23.5	6.7	276.75			21			0	High	High	1	0		0		0		Carbamidomethyl [C83; C84; C143]; Oxidation [M25; M59]
FALSE	High	Master Protein	P51174	Acadl	Long-chain specific acyl-CoA dehydrogenase, mitochondrial [OS=Mus musculus]	0	140.789	40	19	65	19	430	47.9	8.31	160.78			19			0	High	High	1	0		0		0		Carbamidomethyl [C166; C351]; Oxidation [M418]
FALSE	High	Master Protein	P51175	Ppox	protoporphyrinogen oxidase [OS=Mus musculus]	0	14.986	9	3	3	3	477	50.8	8.84	2.16			3			0	High	Not Found	1	0		0		0		Carbamidomethyl [C418]
FALSE	High	Master Protein	P51410	Rpl9	60S ribosomal protein L9 [OS=Mus musculus]	0	127.818	52	12	49	12	192	21.9	9.95	121.4		3.62	11		1	0	High	High	1	0		0		0		Carbamidomethyl [C74; C134]; Oxidation [M80]
FALSE	High	Master Protein	P51432	Plcb3	1-phosphatidylinositol 4,5-bisphosphate phosphodiesterase beta-3 [OS=Mus musculus]	0	96.268	21	24	65	24	1234	139.4	5.94	84.61			24			0	High	High	1	0		0		0		Carbamidomethyl [C193; C221; C358; C825; C1176]
FALSE	High	Master Protein	P51480	Cdkn2a	cyclin-dependent kinase inhibitor 2A [OS=Mus musculus]	0	47.929	45	4	9	4	168	17.9	6.52	27.15			4			0	High	High	1	0		0		0		Carbamidomethyl [C127; C130; C137]
FALSE	High	Master Protein	P51569	Gla	alpha-galactosidase A [OS=Mus musculus]	0	46.867	24	8	20	8	419	47.6	5.72	34.89			8			0	High	High	1	0		0		0		Carbamidomethyl [C172; C174; C330; C363]; Oxidation [M42]
FALSE	High	Master Protein	P51655	Gpc4	Glypican-4 [OS=Mus musculus]	0	53.203	25	10	15	10	557	62.5	6.33	23.2			10			0	High	High	1	0		0		0		Carbamidomethyl [C91; C189; C244; C266; C270; C341; C408; C423]
FALSE	High	Master Protein	P51660	Hsd17b4	peroxisomal multifunctional enzyme type 2 [OS=Mus musculus]	0	171.15	41	28	97	28	735	79.4	8.57	185.5		18.19	26		2	0	High	High	1	0		0		0		Carbamidomethyl [C189; C424]
FALSE	High	Master Protein	P51807	Dynlt1	Dynein light chain Tctex-type 1 [OS=Mus musculus]	0	43.011	44	4	11	4	113	12.5	5.08	29		2.32	3		1	0	High	High	1	0		0		0		Carbamidomethyl [C67; C83; C93]
FALSE	High	Master Protein	P51855	Gss	glutathione synthetase [OS=Mus musculus]	0	24.415	15	8	16	8	474	52.2	5.8	18.48			8			0	High	High	1	0		0		0		Carbamidomethyl [C132]
FALSE	High	Master Protein	P51859	Hdgf	hepatoma-derived growth factor [OS=Mus musculus]	0	186.607	79	22	108	20	237	26.3	4.83	241.68	44.84	2.68	19	3	1	0	High	High	1	0		1	Deamidated [N91]	1	Phospho [S165]	Phospho [S165]; Carbamidomethyl [C12; C108]; Deamidated [N91]; Oxidation [M20; M33]
FALSE	High	Master Protein	P51863	Atp6v0d1	V-type proton ATPase subunit d 1 [OS=Mus musculus]	0	5.374	7	2	3	2	351	40.3	5	1.94			2			0	High	High	1	0		0		0
FALSE	High	Master Protein	P51881	Slc25a5	ADP/ATP translocase 2 [OS=Mus musculus]	0	242.579	58	29	363	15	298	32.9	9.73	478.96	4.59	21.07	25	1	4	0	High	High	1	0		0		0		Carbamidomethyl [C57; C160; C257]; Oxidation [M201; M238; M239; M240; M250; M282]; Met-loss+Acetyl [N-Term]
FALSE	High	Master Protein	P51912	Slc1a5	Neutral amino acid transporter B(0) [OS=Mus musculus]	0	19.683	10	5	13	5	553	58.4	7.84	6.74			5			0	High	High	1	0		0		0		Carbamidomethyl [C222]
FALSE	High	Master Protein	P51949	Mnat1	CDK-activating kinase assembly factor MAT1 [OS=Mus musculus]	0	8.109	10	2	2	2	309	35.8	5.82	2.81	2.3		1	1		0	Not Found	High	1	0		1	Deamidated [Q281]	0		Carbamidomethyl [C46; C49; C293]; Deamidated [Q281]
FALSE	High	Master Protein	P52019	Sqle	squalene monooxygenase [OS=Mus musculus]	0	7.954	5	2	2	2	572	63.7	8.47	4.62			2			0	High	Not Found	1	0		0		0
FALSE	High	Master Protein	P52196	Tst	thiosulfate sulfurtransferase [OS=Mus musculus]	0	37.489	29	9	19	8	297	33.4	7.85	24.46	3.71		9	1		0	High	High	1	0		1	Deamidated [Q192]	0		Carbamidomethyl [C64; C248]; Deamidated [Q192]
FALSE	High	Master Protein	P52293	Kpna2	Importin subunit alpha-1 [OS=Mus musculus]	0	102.193	33	14	43	14	529	57.9	5.68	111.57			14			0	High	High	1	0		0		0		Met-loss+Acetyl [N-Term]; Carbamidomethyl [C237]
FALSE	High	Master Protein	P52332	Jak1	Tyrosine-protein kinase JAK1 [OS=Mus musculus]	0	66.475	16	14	24	14	1153	133.3	7.59	37.94			14			0	High	High	1	0		0		0		Carbamidomethyl [C715; C762; C826]
FALSE	High	Master Protein	P52431	Pold1	DNA polymerase delta catalytic subunit [OS=Mus musculus]	0	102.167	25	26	56	26	1105	123.7	7.61	69.4			26			0	High	High	1	0		0		0		Carbamidomethyl [C358; C510; C759; C871; C1024; C1056; C1059; C1069; C1074]
FALSE	High	Master Protein	P52432	Polr1c	DNA-directed RNA polymerases I and III subunit RPAC1 [OS=Mus musculus]	0	49.082	27	7	18	7	346	39.1	5.21	42.46			7			0	High	High	1	0		0		0		Met-loss+Acetyl [N-Term]
FALSE	High	Master Protein	P52479	Usp10	Ubiquitin carboxyl-terminal hydrolase 10 [OS=Mus musculus]	0	66.491	21	13	36	13	792	87	5.17	58.09	2.7		13	1		0	High	High	1	0		1	Deamidated [Q249]	0		Carbamidomethyl [C239; C242; C251; C450]; Deamidated [Q249]
FALSE	High	Master Protein	P52480	Pkm	Pyruvate kinase PKM [OS=Mus musculus]	0	1047.59	84	65	744	8	531	57.8	7.47	1768.21	144.17	173.24	47	8	18	0	High	High	1	0		4	Deamidated [N44; N146; N199; N350]	0		Carbamidomethyl [C31; C49; C152; C165; C326; C358; C423; C424; C474]; Deamidated [N44; N146; N199; N350]; Oxidation [M22; M30; M60; M64; M149; M291; M330; M334; M360; M377; M494; M525]; Met-loss [N-Term]
FALSE	High	Master Protein	P52482	Ube2e1	Ubiquitin-conjugating enzyme E2 E1 [OS=Mus musculus]	0	14.162	19	3	7	1	193	21.3	8.53	13.61			3			0	High	High	1	0		0		0		Carbamidomethyl [C67]
FALSE	High	Master Protein	P52503	Ndufs6	NADH dehydrogenase [ubiquinone] iron-sulfur protein 6, mitochondrial [OS=Mus musculus]	0	26.893	45	4	7	4	116	13	8.65	19.54	2.81		3	1		0	High	High	1	0		1	Deamidated [Q36]	0		Carbamidomethyl [C79; C104; C107]; Deamidated [Q36]
FALSE	High	Master Protein	P52624	Upp1	uridine phosphorylase 1 [OS=Mus musculus]	0	15.266	21	5	7	5	311	34.1	6.58	10.84			5			0	High	High	1	0		0		0		Carbamidomethyl [C58; C90; C132; C226]
FALSE	High	Master Protein	P52633	Stat6	Signal transducer and transcription activator 6 [OS=Mus musculus]	0	46.158	12	9	16	9	837	93.4	6.23	24.24			9			0	High	High	1	0		0		0		Carbamidomethyl [C496]
FALSE	High	Master Protein	P52760	Rida	2-iminobutanoate/2-iminopropanoate deaminase [OS=Mus musculus]	0	27.467	40	5	10	5	135	14.2	8.68	26.54			5			0	High	High	1	0		0		0		Carbamidomethyl [C71]
FALSE	High	Master Protein	P52795	Efnb1	ephrin-B1 [OS=Mus musculus]	0	14.661	14	4	4	4	345	37.8	9.03	4.59			4			0	Not Found	High	1	0		0		0		Carbamidomethyl [C64]
FALSE	High	Master Protein	P52825	Cpt2	Carnitine O-palmitoyltransferase 2, mitochondrial [OS=Mus musculus]	0	93.3	34	18	47	18	658	73.9	8.37	74.77			18			0	High	High	1	0		0		0		Carbamidomethyl [C535; C643]
FALSE	High	Master Protein	P52875	Tmem165	Transmembrane protein 165 [OS=Mus musculus]	0	40.661	23	4	10	4	323	34.8	7.46	26.95			4			0	High	High	1	0		0		0
FALSE	High	Master Protein	P52912	Tia1	nucleolysin TIA-1 [OS=Mus musculus]	0	40.181	25	9	18	5	386	42.8	7.74	35.92			9			0	High	High	1	0		0		0		Carbamidomethyl [C49]
FALSE	High	Master Protein	P53026	Rpl10a	60S ribosomal protein L10A [OS=Mus musculus]	0	123.323	38	14	74	14	217	24.9	9.98	148.94		10.43	12		2	0	High	High	1	0		0		0		Oxidation [M85; M144]; Carbamidomethyl [C164]
FALSE	High	Master Protein	P53395	Dbt	Lipoamide acyltransferase component of branched-chain alpha-keto acid dehydrogenase complex, mitochondrial [OS=Mus musculus]	0	6.415	5	2	2	2	482	53.2	8.6	2.76			2			0	High	Not Found	1	0		0		0
FALSE	High	Master Protein	P53612	Rabggtb	Geranylgeranyl transferase type-2 subunit beta [OS=Mus musculus]	0	25.73	16	5	16	5	339	37.8	5.16	30.61			5			0	High	High	1	0		0		0
FALSE	High	Master Protein	P53690	Mmp14	Matrix metalloproteinase-14 [OS=Mus musculus]	0	49.125	19	12	34	12	582	65.9	8.03	38.84			12			0	High	High	1	0		0		0
FALSE	High	Master Protein	P53702	Hccs	Cytochrome c-type heme lyase [OS=Mus musculus]	0	45.374	36	8	22	8	272	31	7.12	38.62			8			0	High	High	1	0		0		0		Carbamidomethyl [C39; C70; C180; C182]
FALSE	High	Master Protein	P53762	Arnt	Aryl hydrocarbon receptor nuclear translocator [OS=Mus musculus]	0	45.384	13	7	13	7	791	86.9	6.64	33.38			7			0	High	High	1	0		0		0		Carbamidomethyl [C269; C336; C400]
FALSE	High	Master Protein	P53798	Fdft1	squalene synthase [OS=Mus musculus]	0	25.424	14	5	6	5	416	48.1	6.32	15.34			5			0	High	High	1	0		0		0		Carbamidomethyl [C6; C147; C152]
FALSE	High	Master Protein	P53810	Pitpna	Phosphatidylinositol transfer protein alpha isoform [OS=Mus musculus]	0	120.445	77	23	76	20	271	31.9	6.37	133.93			23			0	High	High	1	0		0		0		Carbamidomethyl [C95; C188; C192; C231]; Oxidation [M75; M104; M191]
FALSE	High	Master Protein	P53811	Pitpnb	Phosphatidylinositol transfer protein beta isoform [OS=Mus musculus]	0	161.077	71	25	68	22	271	31.5	6.95	144.72			25			0	High	High	1	0		0		0		Carbamidomethyl [C13; C94; C187; C230]; Oxidation [M74]
FALSE	High	Master Protein	P53986	Slc16a1	Monocarboxylate transporter 1 [OS=Mus musculus]	0	60.114	18	8	30	8	493	53.2	7.47	55.86	6.37		7	1		0	High	High	1	0		0		1	Phospho [S213]	Oxidation [M408]; Phospho [S213]
FALSE	High	Master Protein	P53994	Rab2a	Ras-related protein Rab-2A [OS=Mus musculus]	0	170.589	72	19	117	10	212	23.5	6.54	233.29	14.82	5.34	18	1	1	0	High	High	1	0		1	Deamidated [N183]	0		Oxidation [M47; M115; M146]; Deamidated [N183]; Met-loss+Acetyl [N-Term]; Carbamidomethyl [C21]
FALSE	High	Master Protein	P53995	Anapc1	anaphase-promoting complex subunit 1 [OS=Mus musculus]	0	92.91	12	20	35	20	1944	215.9	6.35	58.81		2.77	19		1	0	High	High	1	0		0		0		Carbamidomethyl [C437; C1074; C1487]
FALSE	High	Master Protein	P53996	Cnbp	Cellular nucleic acid-binding protein [OS=Mus musculus]	0	104.502	52	9	65	1	178	19.6	7.58	144.94			9			0	High	High	1	0		0		0		Carbamidomethyl [C6; C54; C67; C75; C78; C98; C99; C102; C120; C123; C133; C141; C151; C159]; Met-loss+Acetyl [N-Term]
FALSE	High	Master Protein	P54071	Idh2	Isocitrate dehydrogenase [NADP], mitochondrial [OS=Mus musculus]	0	298.393	58	33	154	30	452	50.9	8.69	335.07		35.73	30		3	0	High	High	1	0		0		0		Carbamidomethyl [C113; C154; C235; C308; C402; C418]; Oxidation [M53; M58; M293; M411]
FALSE	High	Master Protein	P54103	Dnajc2	dnaJ homolog subfamily C member 2 [OS=Mus musculus]	0	166.612	43	27	68	27	621	71.7	8.7	143.48			27			0	High	High	1	0		0		0		Carbamidomethyl [C140; C276; C548]
FALSE	High	Master Protein	P54116	Stom	erythrocyte band 7 integral membrane protein [OS=Mus musculus]	0	40.839	31	8	19	8	284	31.4	6.93	37.82			8			0	High	High	1	0		0		0
FALSE	High	Master Protein	P54227	Stmn1	Stathmin [OS=Mus musculus]	0	21.635	31	5	18	5	149	17.3	5.97	29.53			5			0	High	High	1	0		0		0
FALSE	High	Master Protein	P54276	Msh6	DNA mismatch repair protein MSH6 [OS=Mus musculus]	0	218.461	33	38	102	38	1358	151	6.73	219.74			38			0	High	High	1	0		0		0		Carbamidomethyl [C558; C578; C762; C776; C780; C1029; C1035; C1115; C1127; C1267; C1273; C1335]
FALSE	High	Master Protein	P54279	Pms2	Mismatch repair endonuclease PMS2 [OS=Mus musculus]	0.001	3.746	2	2	2	2	859	95.2	7.39	0			2			0	High	High	1	0		0		0
FALSE	High	Master Protein	P54726	Rad23a	UV excision repair protein RAD23 homolog A [OS=Mus musculus]	0	12.359	9	3	10	1	363	39.7	4.58	12.66			3			0	High	Not Found	1	0		0		0
FALSE	High	Master Protein	P54728	Rad23b	UV excision repair protein RAD23 homolog B [OS=Mus musculus]	0	85.114	24	15	75	13	416	43.5	4.83	106.43			15			0	High	High	1	0		0		0		Oxidation [M288]
FALSE	High	Master Protein	P54729	Nub1	NEDD8 ultimate buster 1 [OS=Mus musculus]	0	34.399	14	7	15	7	614	70.3	5.88	22.72			7			0	High	High	1	0		0		0		Carbamidomethyl [C298; C399]
FALSE	High	Master Protein	P54731	Faf1	fas-associated factor 1 [OS=Mus musculus]	0	30.881	16	9	19	9	649	73.8	4.86	26.15			9			0	High	High	1	0		0		0		Carbamidomethyl [C249; C259; C427]
FALSE	High	Master Protein	P54761	Ephb4	Ephrin type-B receptor 4 [OS=Mus musculus]	0	23.536	7	7	10	5	987	108.8	6.95	16.46			7			0	High	High	1	0		0		0		Carbamidomethyl [C61; C320; C754]
FALSE	High	Master Protein	P54775	Psmc4	26S proteasome regulatory subunit 6B [OS=Mus musculus]	0	114.48	45	20	66	20	418	47.4	5.21	123.68	4.84		20	1		0	High	High	1	0		1	Deamidated [Q24]	0		Carbamidomethyl [C210]; Oxidation [M204]; Deamidated [Q24]
FALSE	High	Master Protein	P54822	Adsl	adenylosuccinate lyase [OS=Mus musculus]	0	170.72	46	19	55	19	484	54.8	7.27	126.65			19			0	High	High	1	0		0		0		Carbamidomethyl [C27; C98; C99; C266]; Oxidation [M26; M278]; Met-loss+Acetyl [N-Term]
FALSE	High	Master Protein	P54823	Ddx6	Probable ATP-dependent RNA helicase DDX6 [OS=Mus musculus]	0	185.985	48	23	72	23	483	54.2	8.66	173.87		2.52	22		1	0	High	High	1	0		0		0		Carbamidomethyl [C102; C324; C341; C361; C390]; Oxidation [M197]
FALSE	High	Master Protein	P54923	Adprh	[Protein ADP-ribosylarginine] hydrolase [OS=Mus musculus]	0	96.156	46	15	39	15	362	40	5.76	75.85	2.33		15	1		0	High	High	1	0		1	Deamidated [Q223]	0		Carbamidomethyl [C95; C108; C134; C142]; Deamidated [Q223]; Oxidation [M138]
FALSE	High	Master Protein	P55012	Slc12a2	Solute carrier family 12 member 2 [OS=Mus musculus]	0	19.023	5	6	10	6	1205	131	7.33	13.44			6			0	High	High	1	0		0		0
FALSE	High	Master Protein	P55096	Abcd3	ATP-binding cassette sub-family D member 3 [OS=Mus musculus]	0	52.274	20	9	22	9	659	75.4	9.26	50.51			9			0	High	High	1	0		0		0		Carbamidomethyl [C472; C477]
FALSE	High	Master Protein	P55194	Sh3bp1	SH3 domain-binding protein 1 [OS=Mus musculus]	0	26.607	12	8	12	8	680	74.1	6.6	17.06			8			0	High	High	1	0		0		0		Carbamidomethyl [C102; C388]
FALSE	High	Master Protein	P55258	Rab8a	Ras-related protein Rab-8A [OS=Mus musculus]	0	42.23	38	9	38	3	207	23.7	9.07	41.14			9			0	High	High	1	0		0		0
FALSE	High	Master Protein	P55264	Adk	Adenosine kinase [OS=Mus musculus]	0	120.138	36	17	89	17	361	40.1	6.21	146.93			17			0	High	High	1	0		0		0		Carbamidomethyl [C105; C159; C352]; Met-loss+Acetyl [N-Term]
FALSE	High	Master Protein	P55288	Cdh11	Cadherin-11 [OS=Mus musculus]	0	60.286	22	11	14	11	796	88.1	4.89	34.49		3.16	10		1	0	High	High	1	0		0		0		Carbamidomethyl [C497]
FALSE	High	Master Protein	P55302	Lrpap1	alpha-2-macroglobulin receptor-associated protein [OS=Mus musculus]	0	33.326	18	6	15	6	360	42.2	7.87	34.49			6			0	High	High	1	0		0		0
FALSE	High	Master Protein	P55937	Golga3	Golgin subfamily A member 3 [OS=Mus musculus]	0	13.463	2	3	3	3	1487	167.1	5.4	5.58			3			0	High	High	1	0		0		0
FALSE	High	Master Protein	P56135	Atp5mf	ATP synthase subunit f, mitochondrial [OS=Mus musculus]	0	13.609	38	3	6	3	88	10.3	9.95	12.91			3			0	High	High	1	0		0		0		Met-loss+Acetyl [N-Term]
FALSE	High	Master Protein	P56183	Rrp1	Ribosomal RNA processing protein 1 homolog A [OS=Mus musculus]	0	18.791	6	2	4	2	494	54.7	5.17	9.44	2.49		2	1		0	High	High	1	0		0		1	Phospho [S434]	Phospho [S434]
FALSE	High	Master Protein	P56213	Gfer	FAD-linked sulfhydryl oxidase ALR [OS=Mus musculus]	0	18.249	22	4	13	4	198	22.9	7.93	17.11			4			0	High	High	1	0		0		0		Carbamidomethyl [C135; C138; C164; C181]
FALSE	High	Master Protein	P56376	Acyp1	Acylphosphatase-1 [OS=Mus musculus]	0	7.848	22	2	3	2	99	11.2	9.04	1.85			2			0	High	High	1	0		0		0
FALSE	High	Master Protein	P56382	Atp5f1e	ATP synthase subunit epsilon, mitochondrial [OS=Mus musculus]	0	7.504	44	3	11	3	52	5.8	10.01	15.23			3			0	High	High	1	0		0		0		Carbamidomethyl [C19]
FALSE	High	Master Protein	P56389	Cda	cytidine deaminase [OS=Mus musculus]	0	62.37	72	7	15	7	146	16.1	5.58	40.43	2.81		7	1		0	High	High	1	0		1	Deamidated [N57]	0		Carbamidomethyl [C8; C31; C53; C59; C65]; Deamidated [N57]; Met-loss+Acetyl [N-Term]
FALSE	High	Master Protein	P56390	Cks2	cyclin-dependent kinases regulatory subunit 2 [OS=Mus musculus]	0	10.721	34	3	5	3	79	9.9	8.46	4.29			3			0	High	High	1	0		0		0
FALSE	High	Master Protein	P56391	Cox6b1	Cytochrome c oxidase subunit 6B1 [OS=Mus musculus]	0	35.703	80	7	29	7	86	10.1	8.72	40.35			7			0	High	High	1	0		0		0		Carbamidomethyl [C30; C54; C65]; Met-loss+Acetyl [N-Term]
FALSE	High	Master Protein	P56395	Cyb5a	Cytochrome b5 [OS=Mus musculus]	0	55.526	48	5	22	5	134	15.2	5.07	68.63			5			0	High	High	1	0		0		0
FALSE	High	Master Protein	P56399	Usp5	Ubiquitin carboxyl-terminal hydrolase 5 [OS=Mus musculus]	0	206.422	38	29	88	28	858	95.8	5.01	199.34			29			0	High	High	1	0		0		0		Carbamidomethyl [C195; C838]
FALSE	High	Master Protein	P56480	Atp5f1b	ATP synthase subunit beta, mitochondrial [OS=Mus musculus]	0	458.766	61	27	200	27	529	56.3	5.34	578.27	17.75	9.96	24	4	2	0	High	High	1	0		4	Deamidated [Q332; Q358; N415; Q505]	0		Oxidation [M113; M145; M217; M272; M339; M342; M408; M478; M509]; Deamidated [Q332; Q358; N415; Q505]
FALSE	High	Master Protein	P56546	Ctbp2	c-terminal-binding protein 2 [OS=Mus musculus]	0	44.842	24	10	34	7	445	48.9	6.95	59.8	5.88	8.41	8	2	1	0	High	High	1	0		1	Deamidated [Q63]	0		Carbamidomethyl [C44; C60]; Deamidated [Q63]
FALSE	High	Master Protein	P56695	Wfs1	Wolframin [OS=Mus musculus]	0	6.386	3	2	3	2	890	100.5	7.97	0			2			0	High	High	1	0		0		0		Carbamidomethyl [C692]
FALSE	High	Master Protein	P56959	Fus	RNA-binding protein FUS [OS=Mus musculus]	0	100.545	17	11	32	11	518	52.6	9.36	89.37			11			0	High	High	1	0		0		0		Oxidation [M429; M457]; Carbamidomethyl [C421; C426]
FALSE	High	Master Protein	P56960	Exosc10	exosome component 10 [OS=Mus musculus]	0	12.592	5	3	4	3	887	100.9	8.29	10			3			0	High	High	1	0		0		0
FALSE	High	Master Protein	P57716	Ncstn	Nicastrin [OS=Mus musculus]	0	31.723	10	8	21	8	708	78.4	6.09	37.38			8			0	High	High	1	0		0		0
FALSE	High	Master Protein	P57722	Pcbp3	Poly(rC)-binding protein 3 [OS=Mus musculus]	0	107.264	36	11	66	3	371	39.3	7.52	160.44			11			0	High	High	1	0		0		0		Carbamidomethyl [C86; C141; C190; C195]; Oxidation [M169]
FALSE	High	Master Protein	P57724	Pcbp4	poly(rC)-binding protein 4 [OS=Mus musculus]	0	22.712	14	5	18	3	403	41.4	8.34	32.69			5			0	High	High	1	0		0		0		Carbamidomethyl [C58; C88; C113]
FALSE	High	Master Protein	P57746	Atp6v1d	V-type proton ATPase subunit D [OS=Mus musculus]	0	14.104	11	2	3	2	247	28.4	9.45	7.95			2			0	High	High	1	0		0		0
FALSE	High	Master Protein	P57759	Erp29	Endoplasmic reticulum resident protein 29 [OS=Mus musculus]	0	38.649	32	8	22	8	262	28.8	6.15	46.29	2.14		8	1		0	High	High	1	0		2	Deamidated [N130; N135]	0		Deamidated [N130; N135]
FALSE	High	Master Protein	P57776	Eef1d	Elongation factor 1-delta [OS=Mus musculus]	0	174.928	75	20	83	2	281	31.3	5.02	154.29	44.21	7.57	18	4	1	0	High	High	1	0		1	Deamidated [N30]	2	Phospho [S133; S162]	Oxidation [M29; M135]; Phospho [S133; S162]; Deamidated [N30]; Carbamidomethyl [C217; C247]; Met-loss+Acetyl [N-Term]
FALSE	High	Master Protein	P57780	Actn4	Alpha-actinin-4 [OS=Mus musculus]	0	516.697	62	57	209	37	912	104.9	5.41	512.88		5.21	56		1	0	High	High	1	0		0		0		Carbamidomethyl [C61; C174; C352; C500; C794; C880]; Oxidation [M241; M296; M380; M768; M884]
FALSE	High	Master Protein	P57784	Snrpa1	U2 small nuclear ribonucleoprotein A' [OS=Mus musculus]	0	22.202	26	7	12	7	255	28.3	8.62	18.02			7			0	High	High	1	0		0		0
FALSE	High	Master Protein	P57787	Slc16a3	Monocarboxylate transporter 4 [OS=Mus musculus]	0	48.217	19	11	25	11	470	50.3	7.96	45.62			11			0	High	High	1	0		0		0		Met-loss [N-Term]
FALSE	High	Master Protein	P58021	Tm9sf2	Transmembrane 9 superfamily member 2 [OS=Mus musculus]	0	73.39	17	9	25	9	662	75.3	7.43	59.49		7.23	8		1	0	High	High	1	0		0		0		Carbamidomethyl [C47; C173; C181; C193; C249]
FALSE	High	Master Protein	P58044	Idi1	Isopentenyl-diphosphate Delta-isomerase 1 [OS=Mus musculus]	0	26.66	40	8	18	8	227	26.3	6.16	25.14	3.06		7	1		0	High	High	1	0		1	Deamidated [N83]	0		Carbamidomethyl [C80; C85; C86; C172]; Deamidated [N83]; Met-loss [N-Term]
FALSE	High	Master Protein	P58058	Nadk	NAD kinase [OS=Mus musculus]	0	30.615	17	5	8	5	439	48.6	6.52	20.46			5			0	High	High	1	0		0		0		Carbamidomethyl [C69; C79]
FALSE	High	Master Protein	P58137	Acot8	Acyl-coenzyme A thioesterase 8 [OS=Mus musculus]	0	24.265	26	6	11	6	320	35.8	7.64	23.5			6			0	High	High	1	0		0		0		Carbamidomethyl [C276]; Met-loss+Acetyl [N-Term]
FALSE	High	Master Protein	P58242	Smpdl3b	acid sphingomyelinase-like phosphodiesterase 3B [OS=Mus musculus]	0	21.581	20	8	14	8	456	51.6	6.43	13.78			8			0	High	High	1	0		0		0
FALSE	High	Master Protein	P58252	Eef2	Elongation factor 2 [OS=Mus musculus]	0	850.118	70	85	812	83	858	95.3	6.83	1642.36	44.5	89	68	8	17	0	High	High	1	0		8	Deamidated [N101; Q138; N660; N696; Q775; N791; Q807; Q811]	0		Deamidated [N101; Q138; N660; N696; Q775; N791; Q807; Q811]; Carbamidomethyl [C41; C131; C136; C290; C369; C567; C591; C651; C693; C728; C812]; Oxidation [M22; M156; M157; M231; M305; M383; M395; M396; M430; M453; M454; M494; M697; M781]; Met-loss [N-Term]
FALSE	High	Master Protein	P58281	Opa1	Isoform 2 of Dynamin-like 120 kDa protein, mitochondrial [OS=Mus musculus]	0	88.74	23	19	29	18	997	115.5	7.55	50.71			19			0	High	High	1	0		0		0		Carbamidomethyl [C823; C890; C893]
FALSE	High	Master Protein	P58389	Ptpa	Serine/threonine-protein phosphatase 2A activator [OS=Mus musculus]	0	47.563	36	10	19	10	323	36.7	6.39	37.32			10			0	High	High	1	0		0		0		Carbamidomethyl [C164; C165; C167]
FALSE	High	Master Protein	P58404	Strn4	Striatin-4 [OS=Mus musculus]	0	17.452	6	5	13	3	760	81.6	5.38	23.11			5			0	High	High	1	0		0		0		Carbamidomethyl [C569; C720]
FALSE	High	Master Protein	P58466	Ctdsp1	carboxy-terminal domain RNA polymerase II polypeptide A small phosphatase 1 [OS=Mus musculus]	0	4.358	7	2	2	2	261	29.2	6.13	2.05			2			0	High	High	1	0		0		0
FALSE	High	Master Protein	P58682	Tlr8	toll-like receptor 8 [OS=Mus musculus]	0	5.176	2	2	7	1	1032	119.3	7.31	1.89			2			0	High	High	1	0		0		0
FALSE	High	Master Protein	P58742	Aaas	Aladin [OS=Mus musculus]	0	58.371	24	10	18	10	546	59.4	6.87	45.9			10			0	High	High	1	0		0		0		Carbamidomethyl [C331; C335]
FALSE	High	Master Protein	P58771	Tpm1	Isoform 2 of Tropomyosin alpha-1 chain [OS=Mus musculus]	0	228.071	69	26	77	11	284	32.7	4.75	214.42			26			0	High	High	1	0		0		0		Carbamidomethyl [C190]
FALSE	High	Master Protein	P58774	Tpm2	Isoform 2 of Tropomyosin beta chain [OS=Mus musculus]	0	167.143	39	20	57	8	284	32.9	4.67	160.7			20			0	High	High	1	0		0		0		Carbamidomethyl [C36]
FALSE	High	Master Protein	P58801	Ripk2	Receptor-interacting serine/threonine-protein kinase 2 [OS=Mus musculus]	0	19.172	10	4	4	4	539	60.4	7.2	6.84			4			0	High	Not Found	1	0		0		0		Carbamidomethyl [C324]
FALSE	High	Master Protein	P58802	Tbc1d10a	TBC1 domain family member 10A [OS=Mus musculus]	0	16.399	9	4	6	4	500	56.2	7.85	8.67	2		4	1		0	High	High	1	0		1	Deamidated [N134]	0		Deamidated [N134]
FALSE	High	Master Protein	P58854	Tubgcp3	Gamma-tubulin complex component 3 [OS=Mus musculus]	0	19.28	5	5	7	5	905	103.4	8.32	8.37			5			0	High	High	1	0		0		0		Carbamidomethyl [C760]
FALSE	High	Master Protein	P58871	Tnks1bp1	182 kDa tankyrase-1-binding protein [OS=Mus musculus]	0	367.282	38	52	136	52	1720	181.7	4.88	299.61	5.54	5.73	50	2	2	0	High	High	1	0		0		2	Phospho [S1063; S1373]	Carbamidomethyl [C136; C206; C259; C717; C1003; C1289; C1317; C1327; C1346]; Phospho [S1063; S1373]; Oxidation [M1283]
FALSE	High	Master Protein	P59016	Vps33b	Vacuolar protein sorting-associated protein 33B [OS=Mus musculus]	0	135.936	46	27	42	27	617	70.5	6.86	78.35			27			0	Not Found	High	1	0		0		0		Carbamidomethyl [C259; C522; C546]; Oxidation [M202]
FALSE	High	Master Protein	P59017	Bcl2l13	Bcl-2-like protein 13 [OS=Mus musculus]	0	28.571	15	4	10	4	434	46.7	4.59	24.58			4			0	High	High	1	0		0		0		Carbamidomethyl [C136]
FALSE	High	Master Protein	P59024	Fkbp14	Peptidyl-prolyl cis-trans isomerase FKBP14 [OS=Mus musculus]	0	14.551	18	3	3	3	211	24.2	6.04	6.2			3			0	High	Not Found	1	0		0		0
FALSE	High	Master Protein	P59108	Cpne2	Copine-2 [OS=Mus musculus]	0	65.392	27	13	30	13	548	61	5.96	66.62			13			0	High	High	1	0		0		0		Carbamidomethyl [C48; C265]
FALSE	High	Master Protein	P59114	Pcif1	Phosphorylated CTD-interacting factor 1 [OS=Mus musculus]	0	10.183	5	3	4	3	706	80.5	7.64	4.24			3			0	High	High	1	0		0		0
FALSE	High	Master Protein	P59222	Scarf2	Scavenger receptor class F member 2 [OS=Mus musculus]	0	11.977	4	3	5	3	833	87.8	8.22	1.83			3			0	High	High	1	0		0		0		Carbamidomethyl [C101; C265; C274; C287]
FALSE	High	Master Protein	P59235	Nup43	Nucleoporin Nup43 [OS=Mus musculus]	0	32.63	21	5	10	5	380	42	5.39	28.36			5			0	High	High	1	0		0		0
FALSE	High	Master Protein	P59266	Fitm2	fat storage-inducing transmembrane protein 2 [OS=Mus musculus]	0.002	3.307	5	2	2	2	262	30	9	0			2			0	High	High	1	1	Acetyl [N-Term]	0		0		Carbamidomethyl [C7]; Acetyl [N-Term]
FALSE	High	Master Protein	P59279	Rab2b	Ras-related protein Rab-2B [OS=Mus musculus]	0	83.626	49	12	53	3	216	24.2	6.68	112.76		5.34	11		1	0	High	High	1	0		0		0		Oxidation [M146]; Carbamidomethyl [C21; C154]
FALSE	High	Master Protein	P59325	Eif5	Eukaryotic translation initiation factor 5 [OS=Mus musculus]	0	72.778	35	15	41	15	429	48.9	5.52	77.81			15			0	High	High	1	0		0		0		Carbamidomethyl [C99; C102; C138; C318]
FALSE	High	Master Protein	P59326	Ythdf1	YTH domain-containing family protein 1 [OS=Mus musculus]	0	102.249	29	14	35	7	559	60.8	8.95	73.71			14			0	High	High	1	0		0		0		Carbamidomethyl [C412]
FALSE	High	Master Protein	P59328	Wdhd1	WD repeat and HMG-box DNA-binding protein 1 [OS=Mus musculus]	0	171.653	34	30	71	30	1117	124.2	5.63	153.82	8.48	2.81	28	1	1	0	High	High	1	0		1	Deamidated [Q820]	1	Phospho [S821]	Phospho [S821]; Deamidated [Q820]; Carbamidomethyl [C60; C170; C277; C285; C506; C655; C709; C998]
FALSE	High	Master Protein	P59481	Lman2l	VIP36-like protein [OS=Mus musculus]	0	10.158	8	3	3	3	347	39.9	9.41	2.98			3			0	High	High	1	0		0		0		Carbamidomethyl [C103; C199]
FALSE	High	Master Protein	P59672	Anks1a	Ankyrin repeat and SAM domain-containing protein 1A [OS=Mus musculus]	0	4.897	2	2	2	2	1150	125.2	6.05	2.02			2			0	Not Found	High	1	0		0		0
FALSE	High	Master Protein	P59759	Mrtfb	MKL/myocardin-like protein 2 [OS=Mus musculus]	0	28.75	6	5	8	3	1080	117.5	6.16	20.89			5			0	High	High	1	0		0		0
FALSE	High	Master Protein	P59808	Sash1	SAM and SH3 domain-containing protein 1 [OS=Mus musculus]	0	72.772	16	15	25	15	1230	135.5	6.2	54.04	1.91		14	1		0	High	High	1	0		0		1	Phospho [S831]	Carbamidomethyl [C399; C814; C1018; C1153]; Phospho [S831]
FALSE	High	Master Protein	P59999	Arpc4	Actin-related protein 2/3 complex subunit 4 [OS=Mus musculus]	0	39.538	45	7	22	7	168	19.7	8.43	49.62			7			0	High	High	1	0		0		0		Met-loss+Acetyl [N-Term]
FALSE	High	Master Protein	P60122	Ruvbl1	RuvB-like 1 [OS=Mus musculus]	0	255.623	64	25	88	25	456	50.2	6.42	260.98	3.23	8.2	23	1	2	0	High	High	1	0		1	Deamidated [N145]	0		Carbamidomethyl [C49; C94; C141]; Deamidated [N145]; Oxidation [M96; M364; M371; M455]
FALSE	High	Master Protein	P60229	Eif3e	Eukaryotic translation initiation factor 3 subunit E [OS=Mus musculus]	0	107.487	41	19	56	19	445	52.2	6.04	98.12			19			0	High	High	1	0		0		0		Carbamidomethyl [C345; C350]; Oxidation [M94; M362; M393]; Met-loss+Acetyl [N-Term]
FALSE	High	Master Protein	P60335	Pcbp1	Poly(RC)-binding protein 1 [OS=Mus musculus]	0	215.493	64	19	111	11	356	37.5	7.09	298.58	4.79	6.52	17	1	2	0	High	High	1	0		0		0		Oxidation [M74; M137; M179; M186; M250]; Carbamidomethyl [C54; C109; C158; C163; C194]
FALSE	High	Master Protein	P60487	Pdxp	Pyridoxal phosphate phosphatase [OS=Mus musculus]	0	17.87	16	3	3	3	292	31.5	5.74	7.21			3			0	High	High	1	0		0		0
FALSE	High	Master Protein	P60521	Gabarapl2	Gamma-aminobutyric acid receptor-associated protein-like 2 [OS=Mus musculus]	0	14.466	23	4	10	3	117	13.7	8.1	15.59			4			0	High	High	1	0		0		0
FALSE	High	Master Protein	P60605	Ube2g2	Ubiquitin-conjugating enzyme E2 G2 [OS=Mus musculus]	0	12.982	22	2	2	2	165	18.6	4.7	3.34			2			0	Not Found	High	1	0		0		0		Carbamidomethyl [C75; C89]
FALSE	High	Master Protein	P60670	Nploc4	Nuclear protein localization protein 4 homolog [OS=Mus musculus]	0	112.361	33	20	57	20	608	68	6.46	103.33		10.09	18		2	0	High	High	1	0		0		0		Carbamidomethyl [C188; C194; C205; C208; C399; C403]; Met-loss+Acetyl [N-Term]
FALSE	High	Master Protein	P60710	Actb	Actin, cytoplasmic 1 [OS=Mus musculus]	0	1089.1	90	85	1247	1	375	41.7	5.48	2570.81	141.41	455.7	37	13	47	0	High	High	1	0		8	Deamidated [N92; N128; Q137; Q225; N252; Q263; N280; N296]	0		Carbamidomethyl [C17; C217; C257; C272; C285]; Oxidation [M16; M44; M47; P70; M82; M132; M153; M190; M227; P243; M269; M283; M305; M313; M325; D363]; Deamidated [N92; N128; Q137; Q225; N252; Q263; N280; N296]; Met-loss [N-Term]; Met-loss+Acetyl [N-Term]
FALSE	High	Master Protein	P60762	Morf4l1	Isoform 2 of Mortality factor 4-like protein 1 [OS=Mus musculus]	0	8.847	12	3	5	3	323	37.2	9.19	2.22			3			0	High	High	1	0		0		0
FALSE	High	Master Protein	P60764	Rac3	Ras-related C3 botulinum toxin substrate 3 [OS=Mus musculus]	0	28.491	46	9	38	1	192	21.4	8.15	62.68		7.24	7		2	0	High	Not Found	1	0		0		0		Carbamidomethyl [C6; C157; C178]
FALSE	High	Master Protein	P60766	Cdc42	Cell division control protein 42 homolog [OS=Mus musculus]	0	90.135	67	12	84	11	191	21.2	6.55	161.92	5.9	22.8	9	1	3	0	High	High	1	0		0		0		Carbamidomethyl [C6; C18; C105; C157]
FALSE	High	Master Protein	P60843	Eif4a1	Eukaryotic initiation factor 4A-I [OS=Mus musculus]	0	432.707	62	33	264	17	406	46.1	5.48	669.29		19.65	29		4	0	High	High	1	0		0		0		Carbamidomethyl [C66; C131; C134]; Oxidation [M121; M127; M149; M165; M178; M187; M216; M302; M306; M375]
FALSE	High	Master Protein	P60867	Rps20	40S ribosomal protein S20 [OS=Mus musculus]	0	82.454	43	11	51	11	119	13.4	9.94	99.93		11.98	9		2	0	High	High	1	0		0		0		Met-loss+Acetyl [N-Term]; Carbamidomethyl [C36]
FALSE	High	Master Protein	P60904	Dnajc5	DnaJ homolog subfamily C member 5 [OS=Mus musculus]	0	39.446	33	4	11	4	198	22.1	5.07	27.11	5.12		4	1		0	High	High	1	0		1	Deamidated [Q174]	0		Deamidated [Q174]
FALSE	High	Master Protein	P61021	Rab5b	Ras-related protein Rab-5B [OS=Mus musculus]	0	28.819	27	5	26	2	215	23.7	8.13	60.67			5			0	High	High	1	0		0		0		Oxidation [M88]
FALSE	High	Master Protein	P61022	Chp1	Calcineurin B homologous protein 1 [OS=Mus musculus]	0	7.652	12	2	2	2	195	22.4	5.1	4.86			2			0	Not Found	High	1	0		0		0
FALSE	High	Master Protein	P61025	Cks1b	cyclin-dependent kinases regulatory subunit 1 [OS=Mus musculus]	0	15.597	33	2	10	2	79	9.7	8.94	14.72			2			0	High	High	1	0		0		0		Oxidation [M38]
FALSE	High	Master Protein	P61027	Rab10	ras-related protein rab-10 [OS=Mus musculus]	0	98.573	62	16	66	13	200	22.5	8.38	120.2		2.69	15		1	0	High	High	1	0		0		0		Carbamidomethyl [C124]
FALSE	High	Master Protein	P61028	Rab8b	Ras-related protein Rab-8B [OS=Mus musculus]	0	36.253	38	9	39	3	207	23.6	9.07	45.96			9			0	High	High	1	0		0		0		Carbamidomethyl [C23]
FALSE	High	Master Protein	P61079	Ube2d3	Ubiquitin-conjugating enzyme E2 D3 [OS=Mus musculus]	0	29.977	27	5	18	3	147	16.7	7.8	39	5.44		5	1		0	High	High	1	0		1	Deamidated [N81]	0		Carbamidomethyl [C85]; Deamidated [N81]
FALSE	High	Master Protein	P61080	Ube2d1	Ubiquitin-conjugating enzyme E2 D1 [OS=Mus musculus]	0	17.074	20	2	5	1	147	16.6	7.42	14.32	5.44		2	1		0	Not Found	High	1	0		1	Deamidated [N81]	0		Carbamidomethyl [C85]; Deamidated [N81]
FALSE	High	Master Protein	P61082	Ube2m	NEDD8-conjugating enzyme Ubc12 [OS=Mus musculus]	0	47.793	44	10	53	10	183	20.9	7.69	86.32			10			0	High	High	1	0		0		0		Carbamidomethyl [C47; C65]
FALSE	High	Master Protein	P61087	Ube2k	Ubiquitin-conjugating enzyme E2 K [OS=Mus musculus]	0	44.794	47	9	28	9	200	22.4	5.44	62.59			9			0	High	High	1	0		0		0		Carbamidomethyl [C170]; Met-loss+Acetyl [N-Term]
FALSE	High	Master Protein	P61089	Ube2n	ubiquitin-conjugating enzyme E2 N [OS=Mus musculus]	0	53.561	61	10	40	10	152	17.1	6.57	72.96	5.35	2.6	9	1	1	0	High	High	1	0		1	Deamidated [Q43]	0		Carbamidomethyl [C87]; Deamidated [Q43]
FALSE	High	Master Protein	P61161	Actr2	Actin-related protein 2 [OS=Mus musculus]	0	187.045	49	21	92	21	394	44.7	6.74	192.8		5.76	20		1	0	High	High	1	0		0		0		Carbamidomethyl [C11; C20; C221]; Oxidation [M56; M67; M74; M114; M309; M373]
FALSE	High	Master Protein	P61164	Actr1a	Alpha-centractin [OS=Mus musculus]	0	106.194	51	16	49	8	376	42.6	6.64	96.35	5.26	4.65	14	1	1	0	High	High	1	1	Acetyl [N-Term]	1	Deamidated [Q240]	0		Carbamidomethyl [C34; C222]; Deamidated [Q240]; Oxidation [M86]; Acetyl [N-Term]
FALSE	High	Master Protein	P61202	Cops2	COP9 signalosome complex subunit 2 [OS=Mus musculus]	0	147.37	46	21	61	21	443	51.6	5.53	128.56	3.05		21	1		0	High	High	1	0		1	Deamidated [Q180]	0		Carbamidomethyl [C179]; Deamidated [Q180]
FALSE	High	Master Protein	P61205	Arf3	ADP-ribosylation factor 3 [OS=Mus musculus]	0	143.497	64	12	110	6	181	20.6	7.43	247.8	13.81	4.64	11	3	1	0	High	High	1	0		2	Deamidated [Q83; Q86]	0		Deamidated [Q83; Q86]; Oxidation [M22; D129; M134]
FALSE	High	Master Protein	P61211	Arl1	ADP-ribosylation factor-like protein 1 [OS=Mus musculus]	0	61.427	55	8	28	8	181	20.4	5.72	68.23		3.11	7		1	0	High	High	1	0		0		0		Carbamidomethyl [C80; C95]
FALSE	High	Master Protein	P61222	Abce1	ATP-binding cassette sub-family E member 1 [OS=Mus musculus]	0	150.231	45	25	62	25	599	67.3	8.34	125.18	0	3.98	24	1	1	0	High	High	1	0		1	Deamidated [N112]	0		Carbamidomethyl [C38; C65; C88; C201; C227; C231]; Deamidated [N112]
FALSE	High	Master Protein	P61226	Rap2b	ras-related protein Rap-2b [OS=Mus musculus]	0	26.612	26	5	14	2	183	20.5	4.81	30.62			5			0	High	High	1	0		0		0		Carbamidomethyl [C140]
FALSE	High	Master Protein	P61255	Rpl26	60S ribosomal protein L26 [OS=Mus musculus]	0	73.62	48	12	78	12	145	17.2	10.55	129.54	2.51	0	12	1	1	0	High	High	1	0		1	Deamidated [N91]	0		Deamidated [N91]; Oxidation [M1; M30; M47]
FALSE	High	Master Protein	P61290	Psme3	Proteasome activator complex subunit 3 [OS=Mus musculus]	0	50.377	32	8	23	8	254	29.5	5.95	51.64			8			0	High	High	1	0		0		0		Carbamidomethyl [C92]; Met-loss+Acetyl [N-Term]
FALSE	High	Master Protein	P61294	Rab6b	Ras-related protein Rab-6B [OS=Mus musculus]	0	47.018	46	11	38	2	208	23.4	5.53	58.13			11			0	High	High	1	0		0		0		Met-loss+Acetyl [N-Term]; Oxidation [M55]
FALSE	High	Master Protein	P61358	Rpl27	60S ribosomal protein L27 [OS=Mus musculus]	0	111.514	59	13	95	13	136	15.8	10.56	169.87		11.7	10		3	0	High	High	1	0		0		0		Oxidation [M81]
FALSE	High	Master Protein	P61514	Rpl37a	60S ribosomal protein L37a [OS=Mus musculus]	0	58.121	42	5	44	5	92	10.3	10.43	100.91		6.49	4		1	0	High	High	1	0		0		0		Carbamidomethyl [C39; C42; C57; C60]; Oxidation [M61]
FALSE	High	Master Protein	P61588	Rnd3	Rho-related GTP-binding protein RhoE [OS=Mus musculus]	0	31.528	30	6	9	6	244	27.4	8.48	21.51			6			0	High	High	1	0		0		0		Carbamidomethyl [C34; C135; C177; C197]
FALSE	High	Master Protein	P61600	Naa20	N-alpha-acetyltransferase 20 [OS=Mus musculus]	0	15.379	24	4	7	4	178	20.4	5.03	13.85			4			0	High	High	1	0		0		0		Carbamidomethyl [C9]
FALSE	High	Master Protein	P61620	Sec61a1	Protein transport protein Sec61 subunit alpha isoform 1 [OS=Mus musculus]	0	84.868	21	15	77	7	476	52.2	8.06	105.75		10.64	13		2	0	High	High	1	0		0		0		Carbamidomethyl [C13]; Oxidation [M399; M401; M409]
FALSE	High	Master Protein	P61622	Itga11	Integrin alpha-11 [OS=Mus musculus]	0	13.61	3	4	4	4	1188	132.9	6.83	3.97			4			0	High	Not Found	1	0		0		0
FALSE	High	Master Protein	P61750	Arf4	ADP-ribosylation factor 4 [OS=Mus musculus]	0	131.179	57	10	94	3	180	20.4	7.14	229.11	8.49	4.64	9	2	1	0	High	High	1	0		2	Deamidated [Q83; Q86]	0		Deamidated [Q83; Q86]; Oxidation [M22; M134; M139]; Carbamidomethyl [C62]
FALSE	High	Master Protein	P61759	Vbp1	Prefoldin subunit 3 [OS=Mus musculus]	0	8.452	10	2	4	2	196	22.4	6.28	9.58			2			0	High	High	1	0		0		0		Carbamidomethyl [C112]
FALSE	High	Master Protein	P61793	Lpar1	lysophosphatidic acid receptor 1 [OS=Mus musculus]	0	6.555	5	2	2	2	364	41.1	8.53	2.39			2			0	High	Not Found	1	0		0		0
FALSE	High	Master Protein	P61804	Dad1	Dolichyl-diphosphooligosaccharide--protein glycosyltransferase subunit DAD1 [OS=Mus musculus]	0	20.717	36	4	14	4	113	12.5	7.08	26.12			4			0	High	High	1	0		0		0		Met-loss [N-Term]
FALSE	High	Master Protein	P61924	Copz1	Coatomer subunit zeta-1 [OS=Mus musculus]	0	26.048	25	4	10	4	177	20.2	4.81	18.15			4			0	High	High	1	0		0		0
FALSE	High	Master Protein	P61957	Sumo2	small ubiquitin-related modifier 2 [OS=Mus musculus]	0	21.033	27	3	7	2	95	10.9	5.5	12.85			3			0	High	High	1	0		0		0
FALSE	High	Master Protein	P61961	Ufm1	Ubiquitin-fold modifier 1 [OS=Mus musculus]	0	8.675	59	2	4	2	85	9.1	9.31	0	5.07		2	1		0	High	High	1	0		1	Deamidated [N52]	0		Deamidated [N52]
FALSE	High	Master Protein	P61963	Dcaf7	DDB1- and CUL4-associated factor 7 [OS=Mus musculus]	0	26.142	21	6	16	6	342	38.9	5.52	25.12			6			0	High	High	1	0		0		0		Carbamidomethyl [C109]
FALSE	High	Master Protein	P61965	Wdr5	WD repeat-containing protein 5 [OS=Mus musculus]	0	35.216	35	8	17	8	334	36.6	8.27	31.78			8			0	High	High	1	0		0		0		Carbamidomethyl [C205]; Met-loss+Acetyl [N-Term]
FALSE	High	Master Protein	P61971	Nutf2	nuclear transport factor 2 [OS=Mus musculus]	0	45.746	57	5	16	5	127	14.5	5.38	35.83			5			0	High	High	1	0		0		0		Oxidation [M97]; Carbamidomethyl [C80; C114]
FALSE	High	Master Protein	P61979	Hnrnpk	Heterogeneous nuclear ribonucleoprotein K [OS=Mus musculus]	0	289.206	60	28	203	1	463	50.9	5.54	447.58		9.87	26		2	0	High	High	1	1	Acetyl [N-Term]	0		0		Oxidation [M27; M42; M283; M321]; Carbamidomethyl [C132; C145; C184; C185]; Acetyl [N-Term]
FALSE	High	Master Protein	P61982	Ywhag	14-3-3 protein gamma [OS=Mus musculus]	0	94.901	46	14	111	7	247	28.3	4.89	155.69			14			0	High	High	1	0		0		0		Oxidation [M23; M27; M223]; Met-loss+Acetyl [N-Term]; Carbamidomethyl [C112]
FALSE	High	Master Protein	P62071	Rras2	Ras-related protein R-Ras2 [OS=Mus musculus]	0	40.118	49	8	26	6	204	23.4	6.01	31.67	4.4		7	1		0	High	High	1	0		0		1	Phospho [S186]	Carbamidomethyl [C183]; Phospho [S186]
FALSE	High	Master Protein	P62082	Rps7	40S ribosomal protein S7 [OS=Mus musculus]	0	120.088	74	15	62	15	194	22.1	10.1	137.43			15			0	High	High	1	1	Acetyl [N-Term]	0		0		Acetyl [N-Term]
FALSE	High	Master Protein	P62137	Ppp1ca	serine/threonine-protein phosphatase PP1-alpha catalytic subunit [OS=Mus musculus]	0	123.741	48	16	65	6	330	37.5	6.33	154.95			16			0	High	High	1	0		0		0		Carbamidomethyl [C62; C105; C140; C171; C172; C245]; Oxidation [M183]; Met-loss+Acetyl [N-Term]
FALSE	High	Master Protein	P62141	Ppp1cb	Serine/threonine-protein phosphatase PP1-beta catalytic subunit [OS=Mus musculus]	0	100.744	38	12	60	3	327	37.2	6.19	137.22			12			0	High	High	1	0		0		0		Carbamidomethyl [C61; C104; C139; C170; C171; C244]; Oxidation [M182]
FALSE	High	Master Protein	P62192	Psmc1	26S proteasome regulatory subunit 4 [OS=Mus musculus]	0	131.635	57	24	75	23	440	49.2	6.21	167.68			24			0	High	High	1	0		0		0		Carbamidomethyl [C58; C148; C399]
FALSE	High	Master Protein	P62196	Psmc5	26S proteasome regulatory subunit 8 [OS=Mus musculus]	0	167.896	63	24	67	23	406	45.6	7.55	153.12			24			0	High	High	1	0		0		0		Carbamidomethyl [C112; C209; C363]; Met-loss+Acetyl [N-Term]
FALSE	High	Master Protein	P62204	Calm1	Calmodulin [OS=Mus musculus]	0	69.641	46	10	40	10	149	16.8	4.22	62.95	14.8		10	1		0	High	High	1	0		1	Deamidated [N98]	0		Met-loss+Acetyl [N-Term]; Deamidated [N98]
FALSE	High	Master Protein	P62242	Rps8	40S ribosomal protein S8 [OS=Mus musculus]	0	205.982	63	22	138	22	208	24.2	10.32	324.25	3.26	7.69	20	1	2	0	High	High	1	0		1	Deamidated [N84]	0		Carbamidomethyl [C71; C72; C100; C174; C182]; Deamidated [N84]
FALSE	High	Master Protein	P62245	Rps15a	40S ribosomal protein S15a [OS=Mus musculus]	0	74.872	75	14	104	14	130	14.8	10.13	220.48			14			0	High	High	1	0		0		0		Carbamidomethyl [C30; C72]; Oxidation [M4; M41; M42]; Met-loss [N-Term]
FALSE	High	Master Protein	P62254	Ube2g1	Ubiquitin-conjugating enzyme E2 G1 [OS=Mus musculus]	0	23.844	52	6	10	6	170	19.5	5.3	10.69	4.13		5	1		0	High	High	1	0		1	Deamidated [N20]	0		Met-loss+Acetyl [N-Term]; Carbamidomethyl [C90]; Deamidated [N20]
FALSE	High	Master Protein	P62257	Ube2h	ubiquitin-conjugating enzyme E2 H [OS=Mus musculus]	0	28.66	28	5	13	5	183	20.6	4.67	27.06			5			0	High	High	1	0		0		0
FALSE	High	Master Protein	P62259	Ywhae	14-3-3 protein epsilon [OS=Mus musculus]	0	176.785	65	21	110	19	255	29.2	4.74	222.86	2.62		21	1		0	High	High	1	1	Acetyl [N-Term]	0		0		Oxidation [D2; M23; M27; M88; M221]; Carbamidomethyl [C97; C98]; Acetyl [N-Term]
FALSE	High	Master Protein	P62264	Rps14	40S ribosomal protein S14 [OS=Mus musculus]	0	159.816	43	13	83	13	151	16.3	10.05	240.62		9.14	11		2	0	High	High	1	0		0		0		Oxidation [M75]; Carbamidomethyl [C85]
FALSE	High	Master Protein	P62267	Rps23	40S ribosomal protein S23 [OS=Mus musculus]	0	29.88	29	6	86	6	143	15.8	10.49	108.27		5.26	5		1	0	High	High	1	0		0		0
FALSE	High	Master Protein	P62270	Rps18	40S ribosomal protein S18 [OS=Mus musculus]	0	85.028	67	17	68	17	152	17.7	10.99	116.91	6.65		17	1		0	High	High	1	0		1	Deamidated [N101]	0		Met-loss+Acetyl [N-Term]; Oxidation [M71]; Deamidated [N101]
FALSE	High	Master Protein	P62274	Rps29	40S ribosomal protein S29 [OS=Mus musculus]	0	21.471	50	4	27	4	56	6.7	10.13	26.13			4			0	High	High	1	0		0		0		Carbamidomethyl [C39]; Met-loss [N-Term]; Oxidation [M38]
FALSE	High	Master Protein	P62281	Rps11	40S ribosomal protein S11 [OS=Mus musculus]	0	142.126	72	20	116	20	158	18.4	10.3	245.88		4.44	19		1	0	High	High	1	0		0		0		Carbamidomethyl [C60; C116; C131]; Oxidation [M109]; Met-loss+Acetyl [N-Term]
FALSE	High	Master Protein	P62301	Rps13	40S ribosomal protein S13 [OS=Mus musculus]	0	99.075	50	14	80	14	151	17.2	10.54	133.06		5.67	12		2	0	High	High	1	0		0		0
FALSE	High	Master Protein	P62311	Lsm3	U6 snRNA-associated Sm-like protein LSm3 [OS=Mus musculus]	0	4.736	20	2	4	2	102	11.8	4.7	4.8			2			0	High	High	1	0		0		0
FALSE	High	Master Protein	P62313	Lsm6	U6 snRNA-associated Sm-like protein LSm6 [OS=Mus musculus]	0	12.415	34	4	12	4	80	9.1	9.58	17.02			4			0	High	High	1	0		0		0
FALSE	High	Master Protein	P62317	Snrpd2	Small nuclear ribonucleoprotein Sm D2 [OS=Mus musculus]	0	17.012	31	4	16	4	118	13.5	9.91	12.92			4			0	High	High	1	0		0		0		Carbamidomethyl [C63]; Met-loss+Acetyl [N-Term]
FALSE	High	Master Protein	P62320	Snrpd3	small nuclear ribonucleoprotein sm d3 [OS=Mus musculus]	0	9.775	15	2	4	2	126	13.9	10.32	9.91			2			0	High	High	1	0		0		0
FALSE	High	Master Protein	P62331	Arf6	ADP-ribosylation factor 6 [OS=Mus musculus]	0	49.429	33	4	21	4	175	20.1	8.95	54.17			4			0	High	High	1	0		0		0		Oxidation [M18]
FALSE	High	Master Protein	P62334	Psmc6	26S proteasome regulatory subunit 10B [OS=Mus musculus]	0	145.959	60	21	84	21	389	44.1	7.49	141.81	5.26		21	2		0	High	High	1	0		2	Deamidated [N129; N339]	0		Oxidation [M218; M368]; Carbamidomethyl [C170; C228; C347]; Deamidated [N129; N339]
FALSE	High	Master Protein	P62340	Tbpl1	TATA box-binding protein-like protein 1 [OS=Mus musculus]	0	15.392	17	2	5	2	186	20.9	9.54	16.86			2			0	High	High	1	0		0		0		Carbamidomethyl [C68; C139]
FALSE	High	Master Protein	P62484	Abi2	abl interactor 2 [OS=Mus musculus]	0	20.191	14	6	9	3	446	49.4	6.01	13.46			6			0	High	High	1	0		0		0
FALSE	High	Master Protein	P62488	Polr2g	DNA-directed RNA polymerase II subunit rpb7 [OS=Mus musculus]	0	20.202	26	4	11	4	172	19.3	5.54	13.29			4			0	High	High	1	0		0		0		Carbamidomethyl [C38]
FALSE	High	Master Protein	P62627	Dynlrb1	Dynein light chain roadblock-type 1 [OS=Mus musculus]	0	16.633	45	3	5	3	96	11	7.25	12.81			3			0	High	High	1	0		0		0		Met-loss+Acetyl [N-Term]
FALSE	High	Master Protein	P62700	Ypel5	Protein yippee-like 5 [OS=Mus musculus]	0	13.956	30	3	4	3	121	13.8	7.31	4.78			3			0	High	High	1	0		0		0		Carbamidomethyl [C17; C20]
FALSE	High	Master Protein	P62702	Rps4x	40S ribosomal protein S4, X isoform [OS=Mus musculus]	0	223.568	80	28	247	28	263	29.6	10.15	367.57		5.15	27		1	0	High	High	1	0		0		0		Carbamidomethyl [C41; C181]; Oxidation [M19; M87; M182]
FALSE	High	Master Protein	P62715	Ppp2cb	serine/threonine-protein phosphatase 2A catalytic subunit beta isoform [OS=Mus musculus]	0	187.833	64	19	75	3	309	35.6	5.43	189.92	10.91	2.51	17	2	2	0	High	High	1	1	Acetyl [N-Term]	3	Deamidated [Q187; Q222; N232]	0		Carbamidomethyl [C20; C133; C196; C251; C266; C269]; Oxidation [M83; M195; M245]; Deamidated [Q187; Q222; N232]; Acetyl [N-Term]
FALSE	High	Master Protein	P62717	Rpl18a	60S ribosomal protein L18a [OS=Mus musculus]	0	103.255	58	18	91	18	176	20.7	10.71	195.03		4.31	17		1	0	High	High	1	0		0		0		Oxidation [M127]; Carbamidomethyl [C22; C64; C109]
FALSE	High	Master Protein	P62737	Acta2	Actin, aortic smooth muscle [OS=Mus musculus]	0	667.352	80	51	853	1	377	42	5.39	1686.53	50.77	143.12	32	6	18	0	High	High	1	0		5	Deamidated [N227; N254; Q265; N282; N299]	0		Carbamidomethyl [C219; C259; C287]; Deamidated [N227; N254; Q265; N282; N299]; Oxidation [M46; M49; M84; M178; M192; P245; M271; M307; M315; M327]
FALSE	High	Master Protein	P62743	Ap2s1	AP-2 complex subunit sigma [OS=Mus musculus]	0	6.956	19	3	7	3	142	17	6.18	5.45			3			0	High	High	1	0		0		0
FALSE	High	Master Protein	P62746	Rhob	Rho-related GTP-binding protein RhoB [OS=Mus musculus]	0	23.045	28	5	13	4	196	22.1	5.24	32.12			5			0	High	High	1	0		0		0		Carbamidomethyl [C16; C20; C107; C159]
FALSE	High	Master Protein	P62748	Hpcal1	Hippocalcin-like protein 1 [OS=Mus musculus]	0	86.738	76	14	36	14	193	22.3	5.5	63.78	3.91		14	1		0	High	High	1	0		1	Deamidated [Q28]	0		Carbamidomethyl [C38; C185]; Deamidated [Q28]
FALSE	High	Master Protein	P62751	Rpl23a	60S ribosomal protein L23a [OS=Mus musculus]	0	93.407	38	11	62	11	156	17.7	10.45	125.91			11			0	High	High	1	0		0		0		Oxidation [M87]
FALSE	High	Master Protein	P62754	Rps6	40S RIBOSOMAL PROTEIN S6 [OS=Mus musculus]	0	198.376	41	20	136	20	249	28.7	10.84	260.64	3.29	6.2	18	1	2	0	High	High	1	0		1	Deamidated [N56]	0		Carbamidomethyl [C12]; Deamidated [N56]; Oxidation [M1; M32; M63]
FALSE	High	Master Protein	P62774	Mtpn	Myotrophin [OS=Mus musculus]	0	53.161	64	4	14	4	118	12.9	5.52	44.59			4			0	High	High	1	0		0		0		Carbamidomethyl [C2; C83]; Met-loss+Acetyl [N-Term]
FALSE	High	Master Protein	P62806	H4c1	histone H4 [OS=Mus musculus]	0	18.204	42	4	7	4	103	11.4	11.36	13.74			4			0	High	High	1	0		0		0
FALSE	High	Master Protein	P62814	Atp6v1b2	V-type proton ATPase subunit B, brain isoform [OS=Mus musculus]	0	114.413	36	16	66	16	511	56.5	5.81	154.75	2.52		16	1		0	High	High	1	0		1	Deamidated [N133]	0		Carbamidomethyl [C112; C207]; Deamidated [N133]
FALSE	High	Master Protein	P62821	Rab1A	Ras-related protein Rab-1A [OS=Mus musculus]	0	115.2	83	17	93	10	205	22.7	6.21	143.59			17			0	High	High	1	0		0		0		Carbamidomethyl [C26; C126]; Oxidation [M166; M176]; Met-loss+Acetyl [N-Term]
FALSE	High	Master Protein	P62827	Ran	GTP-binding nuclear protein RAN [OS=Mus musculus]	0	240.588	63	17	182	17	216	24.4	7.49	440.35	6.48	2.8	16	2	1	0	High	High	1	0		2	Deamidated [N122; N156]	0		Carbamidomethyl [C85; C112; C120]; Met-loss+Acetyl [N-Term]; Deamidated [N122; N156]
FALSE	High	Master Protein	P62830	Rpl23	60S ribosomal protein L23 [OS=Mus musculus]	0	102.104	54	9	108	9	140	14.9	10.51	165.9			9			0	High	High	1	0		0		0		Carbamidomethyl [C28; C125]; Oxidation [M60; M62]
FALSE	High	Master Protein	P62835	Rap1a	ras-related protein Rap-1A [OS=Mus musculus]	0	94.275	57	12	45	4	184	21	6.67	86.29		8.21	11		1	0	High	High	1	0		0		0		Carbamidomethyl [C118; C139; C141]
FALSE	High	Master Protein	P62838	Ube2d2	ubiquitin-conjugating enzyme E2 D2 [OS=Mus musculus]	0	23.826	27	4	16	2	147	16.7	7.83	30.09	5.44		4	1		0	High	High	1	0		1	Deamidated [N81]	0		Carbamidomethyl [C85]; Deamidated [N81]
FALSE	High	Master Protein	P62843	Rps15	40S ribosomal protein S15 [OS=Mus musculus]	0	73.617	54	8	43	8	145	17	10.39	103.05		6.71	6		2	0	High	High	1	0		0		0		Oxidation [M70; M89]; Met-loss+Acetyl [N-Term]
FALSE	High	Master Protein	P62849	Rps24	40S ribosomal protein S24 [OS=Mus musculus]	0	84.838	32	7	49	7	133	15.4	10.78	114.35		2.25	6		1	0	High	High	1	1	Acetyl [N-Term]	0		0		Oxidation [M23; M74]; Acetyl [N-Term]
FALSE	High	Master Protein	P62852	Rps25	40S ribosomal protein S25 [OS=Mus musculus]	0	36.208	35	7	36	7	125	13.7	10.11	82.5			7			0	High	High	1	0		0		0
FALSE	High	Master Protein	P62855	Rps26	40S ribosomal protein S26 [OS=Mus musculus]	0	28.338	44	4	19	4	115	13	11	36.58			4			0	High	High	1	0		0		0		Carbamidomethyl [C74; C77]
FALSE	High	Master Protein	P62858	Rps28	40S ribosomal protein S28 [OS=Mus musculus]	0	30.106	45	5	21	5	69	7.8	10.7	48.78			5			0	High	High	1	0		0		0		Oxidation [M35]
FALSE	High	Master Protein	P62862	Fau	40S ribosomal protein S30 [OS=Mus musculus]	0	19.859	20	4	19	4	59	6.6	12.15	40.46			4			0	High	High	1	0		0		0
FALSE	High	Master Protein	P62869	Elob	Elongin-B [OS=Mus musculus]	0	55.467	85	11	28	11	118	13.2	5.01	55.42		5.65	10		1	0	High	High	1	0		0		0		Carbamidomethyl [C60]
FALSE	High	Master Protein	P62874	Gnb1	Guanine nucleotide-binding protein G(I)/G(S)/G(T) subunit beta-1 [OS=Mus musculus]	0	135.033	47	13	60	9	340	37.4	6	122.66	6.25		13	1		0	High	High	1	0		2	Deamidated [Q32; N35]	0		Carbamidomethyl [C25; C148; C149; C204; C233; C250; C271]; Deamidated [Q32; N35]; Oxidation [M61]; Met-loss+Acetyl [N-Term]
FALSE	High	Master Protein	P62878	Rbx1	E3 ubiquitin-protein ligase RBX1 [OS=Mus musculus]	0	35.936	31	4	18	4	108	12.3	6.96	47.74			4			0	High	High	1	0		0		0		Met-loss+Acetyl [N-Term]; Carbamidomethyl [C94]
FALSE	High	Master Protein	P62880	Gnb2	Guanine nucleotide-binding protein G(I)/G(S)/G(T) subunit beta-2 [OS=Mus musculus]	0	127.886	53	14	71	7	340	37.3	6	142.08	8.31		14	2		0	High	High	1	0		2	Deamidated [N237; N293]	0		Carbamidomethyl [C25; C148; C149; C204; C250; C271; C294]; Deamidated [N237; N293]; Oxidation [M61]; Met-loss+Acetyl [N-Term]
FALSE	High	Master Protein	P62889	Rpl30	60S ribosomal protein L30 [OS=Mus musculus]	0	103.551	73	10	75	10	115	12.8	9.63	131.1	11.76		10	2		0	High	High	1	0		2	Deamidated [N50; N77]	0		Carbamidomethyl [C52; C85; C92]; Oxidation [M65]; Deamidated [N50; N77]
FALSE	High	Master Protein	P62897	Cycs	Cytochrome c, somatic [OS=Mus musculus]	0	78.888	60	11	34	11	105	11.6	9.58	63.74	2.6		11	1		0	High	High	1	0		0		0		Oxidation [D51; M81]
FALSE	High	Master Protein	P62900	Rpl31	60S ribosomal protein L31 [OS=Mus musculus]	0	70.502	49	9	57	9	125	14.5	10.54	78.51			9			0	High	High	1	0		0		0		Oxidation [M57]
FALSE	High	Master Protein	P62908	Rps3	40S ribosomal protein S3 [OS=Mus musculus]	0	222.648	82	27	274	27	243	26.7	9.66	565.2	2.81		27	1		0	High	High	1	0		0		1	Phospho [T221]	Carbamidomethyl [C97; C119; C134]; Phospho [T221]; Oxidation [M127; M157; M189; M236]
FALSE	High	Master Protein	P62911	Rpl32	60S ribosomal protein L32 [OS=Mus musculus]	0	76.056	49	8	36	8	135	15.9	11.33	81.93			8			0	High	High	1	0		0		0		Carbamidomethyl [C91; C96]; Oxidation [M55; M90]; Met-loss+Acetyl [N-Term]
FALSE	High	Master Protein	P62915	Gtf2b	Transcription initiation factor IIB [OS=Mus musculus]	0	61.094	42	11	26	11	316	34.8	8.35	42.11			11			0	High	High	1	0		0		0		Carbamidomethyl [C15; C34; C37; C181; C219; C223]
FALSE	High	Master Protein	P62918	Rpl8	60S ribosomal protein L8 [OS=Mus musculus]	0	218.854	61	20	156	20	257	28	11.03	332.56	17.19	8.81	17	4	2	0	High	High	1	0		4	Deamidated [Q86; N97; N100; N205]	0		Carbamidomethyl [C90; C114; C115]; Deamidated [Q86; N97; N100; N205]; Oxidation [M107; M204; P206]
FALSE	High	Master Protein	P62960	Ybx1	Nuclease-sensitive element-binding protein 1 [OS=Mus musculus]	0	264.97	76	23	92	15	322	35.7	9.88	214.69	47.49	15.9	19	6	1	0	High	High	1	0		6	Deamidated [N68; N122; N162; N169; Q265; Q270]	2	Phospho [S163; S172]	Deamidated [N68; N122; N162; N169; Q265; Q270]; Met-loss+Acetyl [N-Term]; Phospho [S163; S172]
FALSE	High	Master Protein	P62962	Pfn1	profilin-1 [OS=Mus musculus]	0	202.184	89	18	416	18	140	14.9	8.28	607.89	16.84	23.28	14	2	4	0	High	High	1	0		2	Deamidated [N62; N100]	0		Carbamidomethyl [C17; C71; C128]; Oxidation [M86; M105; M114; M131]; Deamidated [N62; N100]
FALSE	High	Master Protein	P62965	Crabp1	Cellular retinoic acid-binding protein 1 [OS=Mus musculus]	0	132.803	85	14	65	13	137	15.6	5.38	160.31		4.2	13		1	0	High	High	1	0		0		0		Oxidation [M28]; Carbamidomethyl [C96; C130]; Met-loss [N-Term]
FALSE	High	Master Protein	P62983	Rps27a	Ubiquitin-40S ribosomal protein S27a [OS=Mus musculus]	0	182.965	68	17	359	17	156	17.9	9.64	708.34	3.93	3.9	15	1	2	0	High	High	1	0		1	Deamidated [N111]	0		Carbamidomethyl [C121; C126; C144; C145; C149]; Oxidation [M1; M132]; Deamidated [N111]
FALSE	High	Master Protein	P62996	Tra2b	transformer-2 protein homolog beta [OS=Mus musculus]	0	5.931	11	3	6	3	288	33.6	11.25	0		2.62	2		1	0	High	High	1	0		0		0
FALSE	High	Master Protein	P63001	Rac1	Ras-related C3 botulinum toxin substrate 1 [OS=Mus musculus]	0	98.166	60	12	77	4	192	21.4	8.5	184.75		7.24	10		2	0	High	High	1	0		0		0		Carbamidomethyl [C6; C105; C157; C178]; Oxidation [M145]
FALSE	High	Master Protein	P63005	Pafah1b1	Platelet-activating factor acetylhydrolase IB subunit alpha [OS=Mus musculus]	0	161.671	57	21	87	20	410	46.6	7.37	193.91	5.9		21	1		0	High	High	1	0		1	Deamidated [N22]	0		Oxidation [M39; M239]; Carbamidomethyl [C184; C226; C252; C356]; Deamidated [N22]
FALSE	High	Master Protein	P63011	Rab3a	Ras-related protein Rab-3A [OS=Mus musculus]	0	27.764	28	6	10	2	220	25	5.03	19.69			6			0	High	High	1	0		0		0
FALSE	High	Master Protein	P63013	Prrx1	Paired mesoderm homeobox protein 1 [OS=Mus musculus]	0	18.692	15	3	6	3	245	27.3	9.47	17.44			3			0	High	High	1	0		0		0		Met-loss+Acetyl [N-Term]
FALSE	High	Master Protein	P63017	Hspa8	Heat shock cognate 71 kDa protein [OS=Mus musculus]	0	839.845	76	73	796	45	646	70.8	5.52	1669.69	107.2	107.75	56	14	15	0	High	High	1	0		13	Deamidated [N31; N57; Q58; N62; N96; N141; N151; N235; Q279; N355; N434; Q435; N540]	0		Carbamidomethyl [C17; C574; C603]; Deamidated [N31; N57; Q58; N62; N96; N141; N151; N235; Q279; N355; N434; Q435; N540]; Oxidation [M61; M87; M93; M122; M127; M237; M549; M617; M621]; Met-loss+Acetyl [N-Term]
FALSE	High	Master Protein	P63024	Vamp3	Vesicle-associated membrane protein 3 [OS=Mus musculus]	0	59.868	56	7	12	7	103	11.5	8.5	35.13	3.73		7	1		0	High	High	1	0		1	Deamidated [Q25]	0		Met-loss+Acetyl [N-Term]; Deamidated [Q25]
FALSE	High	Master Protein	P63028	Tpt1	Translationally-controlled tumor protein [OS=Mus musculus]	0	124.007	88	16	141	16	172	19.5	4.86	141.11	7.77	28.29	10	1	6	0	High	High	1	0		1	Deamidated [N51]	0		Oxidation [M115; M169]; Carbamidomethyl [C28; C172]; Deamidated [N51]
FALSE	High	Master Protein	P63030	Mpc1	Mitochondrial pyruvate carrier 1 [OS=Mus musculus]	0	5.53	15	2	4	2	109	12.4	9.61	8.11			2			0	High	High	1	0		0		0
FALSE	High	Master Protein	P63037	Dnaja1	DnaJ homolog subfamily A member 1 [OS=Mus musculus]	0	212.369	58	19	86	19	397	44.8	7.08	192.16	11.56	3.5	18	1	1	0	High	High	1	0		1	Deamidated [N377]	0		Carbamidomethyl [C134; C137; C149; C150; C153; C177; C180; C302]; Oxidation [M178; M308]; Deamidated [N377]; Met-loss [N-Term]
FALSE	High	Master Protein	P63038	Hspd1	60 kDa heat shock protein, mitochondrial [OS=Mus musculus]	0	514.866	69	46	315	46	573	60.9	6.18	769.57	19.28		45	4		0	High	High	1	0		4	Deamidated [Q42; N177; N289; N331]	0		Carbamidomethyl [C237; C442; C447]; Oxidation [M145; M217; M356; M477]; Deamidated [Q42; N177; N289; N331]
FALSE	High	Master Protein	P63073	Eif4e	Eukaryotic translation initiation factor 4E [OS=Mus musculus]	0	77.876	45	11	49	11	217	25	6.15	79.3			11			0	High	High	1	0		0		0		Oxidation [M101]; Carbamidomethyl [C170]; Met-loss+Acetyl [N-Term]
FALSE	High	Master Protein	P63085	Mapk1	mitogen-activated protein kinase 1 [OS=Mus musculus]	0	165.963	62	21	75	15	358	41.2	6.98	167.77			21			0	High	High	1	0		0		0		Oxidation [M11; M197]; Carbamidomethyl [C38; C63; C159; C164]; Met-loss+Acetyl [N-Term]
FALSE	High	Master Protein	P63087	Ppp1cc	Isoform Gamma-2 of Serine/threonine-protein phosphatase PP1-gamma catalytic subunit [OS=Mus musculus]	0	118.296	38	13	60	3	337	38.5	6.13	139.85			13			0	High	High	1	0		0		0		Carbamidomethyl [C62; C105; C140; C171; C172; C245]; Oxidation [M183]; Met-loss+Acetyl [N-Term]
FALSE	High	Master Protein	P63094	Gnas	Guanine nucleotide-binding protein G(s) subunit alpha isoforms short [OS=Mus musculus]	0	56.568	32	11	32	10	394	45.6	5.96	71.6			11			0	High	High	1	0		0		0
FALSE	High	Master Protein	P63101	Ywhaz	14-3-3 protein zeta/delta [OS=Mus musculus]	0	199.72	53	18	118	14	245	27.8	4.79	211.86	2.96		18	1		0	High	High	1	1	Acetyl [N-Term]	0		0		Carbamidomethyl [C25]; Oxidation [D2; M22; M26; M160; M218]; Acetyl [N-Term]
FALSE	High	Master Protein	P63158	Hmgb1	High mobility group protein B1 [OS=Mus musculus]	0	479.126	73	32	607	27	215	24.9	5.74	1172.34	35.57	40.67	26	2	6	0	High	High	1	0		2	Deamidated [N134; N135]	0		Carbamidomethyl [C23; C106]; Oxidation [M13; M63; M132]; Deamidated [N134; N135]
FALSE	High	Master Protein	P63168	Dynll1	Dynein light chain 1, cytoplasmic [OS=Mus musculus]	0	14.777	51	3	7	2	89	10.4	7.4	10.53			3			0	High	High	1	0		0		0		Carbamidomethyl [C24; C56]
FALSE	High	Master Protein	P63242	Eif5a	Eukaryotic translation initiation factor 5A-1 [OS=Mus musculus]	0	387.805	89	21	186	21	154	16.8	5.24	532.79	19.45	26.08	17	3	4	0	High	High	1	0		3	Deamidated [N28; N78; Q95]	0		Carbamidomethyl [C22; C73; C129]; Deamidated [N28; N78; Q95]; Oxidation [M20; M43; M79]; Met-loss+Acetyl [N-Term]
FALSE	High	Master Protein	P63254	Crip1	Cysteine-rich protein 1 [OS=Mus musculus]	0	4.524	31	2	2	2	77	8.5	8.57	2.06			2			0	High	Not Found	1	0		0		0		Carbamidomethyl [C7; C28]
FALSE	High	Master Protein	P63260	Actg1	Actin, cytoplasmic 2 [OS=Mus musculus]	0	1073.16	90	85	1237	1	375	41.8	5.48	2534.78	141.41	455.7	37	13	47	0	High	Not Found	1	0		8	Deamidated [N92; N128; Q137; Q225; N252; Q263; N280; N296]	0		Carbamidomethyl [C17; C217; C257; C272; C285]; Oxidation [M44; M47; P70; M82; M132; M153; M190; M227; P243; M269; M283; M305; M313; M325; D363]; Deamidated [N92; N128; Q137; Q225; N252; Q263; N280; N296]; Met-loss+Acetyl [N-Term]
FALSE	High	Master Protein	P63271	Supt4h1a	Transcription elongation factor SPT4-A [OS=Mus musculus]	0	13.858	21	2	5	2	117	13.2	8.06	14.54			2			0	High	High	1	0		0		0		Carbamidomethyl [C16; C19]
FALSE	High	Master Protein	P63276	Rps17	40S ribosomal protein S17 [OS=Mus musculus]	0	138.977	60	10	53	10	135	15.5	9.85	129.91	2.45	2.85	9	1	1	0	High	High	1	0		1	Deamidated [Q93]	0		Deamidated [Q93]; Oxidation [M58; M105; M126]; Carbamidomethyl [C35]
FALSE	High	Master Protein	P63280	Ube2i	SUMO-conjugating enzyme ubc9 [OS=Mus musculus]	0	52.212	35	6	19	6	158	18	8.66	49.58			6			0	High	High	1	0		0		0		Carbamidomethyl [C43]
FALSE	High	Master Protein	P63321	Rala	Ras-related protein Ral-A [OS=Mus musculus]	0	35.561	26	6	12	3	206	23.5	7.11	31.71			6			0	High	High	1	0		0		0
FALSE	High	Master Protein	P63323	Rps12	40S ribosomal protein S12 [OS=Mus musculus]	0	104.751	50	11	60	11	132	14.5	7.24	135.8		5.1	10		1	0	High	High	1	0		0		0		Carbamidomethyl [C50; C56; C92; C106; C108]; Oxidation [M60]
FALSE	High	Master Protein	P63325	Rps10	40S ribosomal protein S10 [OS=Mus musculus]	0	52.44	48	10	35	10	165	18.9	10.15	74.65		13.45	9		1	0	High	High	1	0		0		0
FALSE	High	Master Protein	P63328	Ppp3ca	Isoform 2 of Serine/threonine-protein phosphatase 2B catalytic subunit alpha isoform [OS=Mus musculus]	0	26.614	14	7	15	5	511	57.6	6.3	23.03			7			0	High	High	1	0		0		0
FALSE	High	Master Protein	P63330	Ppp2ca	Serine/threonine-protein phosphatase 2A catalytic subunit alpha isoform [OS=Mus musculus]	0	183.567	59	17	66	1	309	35.6	5.54	182.51	10.91	2.51	15	2	2	0	Not Found	High	1	0		3	Deamidated [Q187; Q222; N232]	0		Carbamidomethyl [C20; C133; C196; C251; C266; C269]; Oxidation [M83; M195; M245]; Deamidated [Q187; Q222; N232]
FALSE	High	Master Protein	P67778	Phb1	Prohibitin [OS=Mus musculus]	0	77.073	53	13	43	13	272	29.8	5.76	90.02			13			0	High	High	1	0		0		0
FALSE	High	Master Protein	P67871	Csnk2b	Casein kinase II subunit beta [OS=Mus musculus]	0	66.072	62	10	34	10	215	24.9	5.55	48.14			10			0	High	High	1	0		0		0		Carbamidomethyl [C23; C109; C114; C140]; Oxidation [M97; M141]
FALSE	High	Master Protein	P67984	Rpl22	60S ribosomal protein L22 [OS=Mus musculus]	0	82.192	69	10	48	9	128	14.8	9.19	110.18	2.13		10	1		0	High	High	1	0		1	Deamidated [N105]	0		Carbamidomethyl [C25]; Oxidation [M34]; Deamidated [N105]
FALSE	High	Master Protein	P68033	Actc1	Actin, alpha cardiac muscle 1 [OS=Mus musculus]	0	700.558	80	52	869	1	377	42	5.39	1726.59	61.29	143.12	33	7	18	0	High	Not Found	1	0		6	Deamidated [N94; N227; N254; Q265; N282; N299]	0		Carbamidomethyl [C219; C259; C287]; Deamidated [N94; N227; N254; Q265; N282; N299]; Oxidation [M46; M49; M84; M178; M192; P245; M271; M307; M315; M327]
FALSE	High	Master Protein	P68037	Ube2l3	Ubiquitin-conjugating enzyme E2 L3 [OS=Mus musculus]	0	72.665	60	8	52	8	154	17.9	8.51	93.63			8			0	High	High	1	0		0		0		Carbamidomethyl [C86]
FALSE	High	Master Protein	P68040	Rack1	Receptor of activated protein C kinase 1 [OS=Mus musculus]	0	290.024	85	26	216	26	317	35.1	7.69	506.2	24.22	15.11	23	3	3	0	High	High	1	0		3	Deamidated [N15; Q143; N159]	0		Carbamidomethyl [C138; C153; C168; C182; C207; C240; C249; C286]; Oxidation [M5; M30; M42; M217]; Deamidated [N15; Q143; N159]; Met-loss+Acetyl [N-Term]
FALSE	High	Master Protein	P68181	Prkacb	cAMP-dependent protein kinase catalytic subunit beta [OS=Mus musculus]	0	81.12	36	14	42	6	351	40.7	8.56	87.11			14			0	High	High	1	0		0		0
FALSE	High	Master Protein	P68254	Ywhaq	14-3-3 protein theta [OS=Mus musculus]	0	148.526	57	19	94	15	245	27.8	4.78	163.85			19			0	High	High	1	1	Acetyl [N-Term]	0		0		Carbamidomethyl [C25; C94; C134]; Oxidation [M22; M26; M160; M218]; Acetyl [N-Term]
FALSE	High	Master Protein	P68368	Tuba4a	Tubulin alpha-4A chain [OS=Mus musculus]	0	518.837	74	41	626	5	448	49.9	5.06	1407.04	82.68	99.1	29	5	12	0	High	High	1	0		6	Deamidated [Q85; Q91; N101; N216; N293; N380]	0		Carbamidomethyl [C20; C25; C54; C213; C295; C315; C316; C347; C376]; Oxidation [M302; M313; M377; M398; M413; M425]; Deamidated [Q85; Q91; N101; N216; N293; N380]
FALSE	High	Master Protein	P68369	Tuba1a	tubulin alpha-1A chain [OS=Mus musculus]	0	618.125	86	53	674	2	451	50.1	5.06	1489.76	99.14	128.19	37	8	16	0	High	High	1	0		9	Deamidated [N18; N50; Q85; Q91; N101; Q128; N216; N293; N380]	0		Carbamidomethyl [C4; C20; C25; C129; C213; C295; C315; C316; C347; C376]; Oxidation [M302; M313; M377; M398; M413; M425]; Deamidated [N18; N50; Q85; Q91; N101; Q128; N216; N293; N380]
FALSE	High	Master Protein	P68372	Tubb4b	Tubulin beta-4B chain [OS=Mus musculus]	0	656.47	76	47	779	4	445	49.8	4.89	1702.93	78.3	80.03	34	8	13	0	High	High	1	0		14	Deamidated [Q11; Q15; Q43; N52; Q83; N89; Q94; N99; N100; Q134; N332; N335; N337; N347]	0		Oxidation [M1; M73; N99; N100; M147; M164; M233; M257; M267; M293; M299; M300; M321; M323; M330; M388]; Carbamidomethyl [C12; C127; C129; C239; C303; C354]; Deamidated [Q11; Q15; Q43; N52; Q83; N89; Q94; N99; N100; Q134; N332; N335; N337; N347]
FALSE	High	Master Protein	P68373	Tuba1c	Tubulin alpha-1C chain [OS=Mus musculus]	0	601.899	82	52	631	1	449	49.9	5.1	1294.58	81.93	128.19	36	8	16	0	High	High	1	0		9	Deamidated [N18; N50; Q85; Q91; N101; Q128; N216; N293; N380]	0		Carbamidomethyl [C4; C20; C25; C129; C213; C295; C315; C316; C347; C376]; Oxidation [M302; M313; M377; M398; M413; M425]; Deamidated [N18; N50; Q85; Q91; N101; Q128; N216; N293; N380]
FALSE	High	Master Protein	P68404	Prkcb	Protein kinase C beta type [OS=Mus musculus]	0	44.683	12	7	14	2	671	76.7	7.01	35.59			7			0	High	High	1	0		0		0		Carbamidomethyl [C50; C53; C67; C70; C71; C386; C488; C586]; Oxidation [M487]
FALSE	High	Master Protein	P68510	Ywhah	14-3-3 protein eta [OS=Mus musculus]	0	95.817	50	17	91	12	246	28.2	4.89	116.69			17			0	High	High	1	0		0		0		Oxidation [M223]; Met-loss+Acetyl [N-Term]; Carbamidomethyl [C112]
FALSE	High	Master Protein	P69566	Ranbp9	Ran-binding protein 9 [OS=Mus musculus]	0	17.459	11	5	7	4	653	71	6.84	10.01			5			0	High	High	1	0		0		0		Carbamidomethyl [C137; C438; C534]
FALSE	High	Master Protein	P70122	Sbds	Ribosome maturation protein SBDS [OS=Mus musculus]	0	99.03	58	16	62	16	250	28.8	8.76	127.18			16			0	High	High	1	0		0		0		Carbamidomethyl [C31; C84]; Met-loss+Acetyl [N-Term]
FALSE	High	Master Protein	P70168	Kpnb1	Importin subunit beta-1 [OS=Mus musculus]	0	290.067	36	31	121	31	876	97.1	4.78	270.65	3.61	17.54	27	1	4	0	High	High	1	0		1	Deamidated [Q220]	0		Carbamidomethyl [C223; C228; C345; C543]; Oxidation [M219; M533; M564; M647; M788]; Deamidated [Q220]
FALSE	High	Master Protein	P70175	Dlg3	Disks large homolog 3 [OS=Mus musculus]	0	42.61	12	8	13	6	849	93.4	6.79	29.51		2.03	7		1	0	High	High	1	0		0		0		Carbamidomethyl [C751]
FALSE	High	Master Protein	P70180	Npr3	Atrial natriuretic peptide receptor 3 [OS=Mus musculus]	0	43.46	22	9	17	9	536	59.8	7.09	31.43			9			0	High	High	1	0		0		0		Carbamidomethyl [C103; C131]
FALSE	High	Master Protein	P70182	Pip5k1a	Phosphatidylinositol 4-phosphate 5-kinase type-1 alpha [OS=Mus musculus]	0	16.076	8	3	5	3	546	60.4	8.59	6.79			3			0	High	High	1	0		0		0
FALSE	High	Master Protein	P70195	Psmb7	Proteasome subunit beta type-7 [OS=Mus musculus]	0	82.62	33	11	56	11	277	29.9	7.99	135.25			11			0	High	High	1	0		0		0		Carbamidomethyl [C74]; Oxidation [M189]
FALSE	High	Master Protein	P70202	Lxn	Latexin [OS=Mus musculus]	0	58.81	34	6	41	6	222	25.5	5.74	97.62		3.67	5		1	0	High	High	1	1	Acetyl [N-Term]	0		0		Carbamidomethyl [C20]; Acetyl [N-Term]
FALSE	High	Master Protein	P70206	Plxna1	Plexin-A1 [OS=Mus musculus]	0	106.257	14	21	37	17	1894	211	6.9	66.6			21			0	High	High	1	0		0		0		Carbamidomethyl [C128; C136; C356; C684; C691; C742; C1011; C1505]
FALSE	High	Master Protein	P70207	Plxna2	Plexin-A2 [OS=Mus musculus]	0	7.623	1	3	5	1	1894	211.4	6.54	0			3			0	High	High	1	0		0		0
FALSE	High	Master Protein	P70208	Plxna3	Plexin-A3 [OS=Mus musculus]	0	16.873	4	6	8	2	1872	207.8	7.09	5.76			6			0	Not Found	High	1	0		0		0
FALSE	High	Master Protein	P70227	Itpr3	Inositol 1,4,5-trisphosphate receptor type 3 [OS=Mus musculus]	0	208.489	21	49	98	49	2670	304.1	6.54	175.94			49			0	High	High	1	0		0		0		Carbamidomethyl [C36; C207; C215; C254; C293; C420; C1236; C1511; C1638; C1738; C1880; C2537; C2540; C2667]
FALSE	High	Master Protein	P70236	Map2k6	Dual specificity mitogen-activated protein kinase kinase 6 [OS=Mus musculus]	0	43.515	38	10	24	10	334	37.4	7.39	33.22			10			0	High	High	1	0		0		0		Carbamidomethyl [C216]; Oxidation [M220]
FALSE	High	Master Protein	P70245	Ebp	3-beta-hydroxysteroid-delta(8),delta(7)-isomerase [OS=Mus musculus]	0	25.897	16	3	13	3	230	26.2	7.56	27.74			3			0	High	High	1	0		0		0		Met-loss+Acetyl [N-Term]
FALSE	High	Master Protein	P70255	Nfic	Nuclear factor 1 C-type [OS=Mus musculus]	0	10.641	5	2	3	1	439	48.7	8.32	6.57			2			0	High	High	1	0		0		0		Carbamidomethyl [C104]
FALSE	High	Master Protein	P70257	Nfix	Isoform NFIX1 of Nuclear factor 1 X-type [OS=Mus musculus]	0	49.114	22	6	18	5	441	48.8	8.47	44.89			6			0	High	High	1	0		0		0		Carbamidomethyl [C102; C103; C408]
FALSE	High	Master Protein	P70261	Pald1	paladin [OS=Mus musculus]	0	16.31	6	5	6	5	859	96.7	6.58	0			5			0	High	High	1	0		0		0		Carbamidomethyl [C458]
FALSE	High	Master Protein	P70271	Pdlim4	PDZ and LIM domain protein 4 [OS=Mus musculus]	0	51.404	54	14	22	14	330	35.5	8.05	42.24			14			0	High	High	1	0		0		0		Carbamidomethyl [C72; C110; C255; C258]; Met-loss+Acetyl [N-Term]
FALSE	High	Master Protein	P70280	Vamp7	vesicle-associated membrane protein 7 [OS=Mus musculus]	0	13.641	19	4	11	4	220	25	8.6	12.33			4			0	High	High	1	0		0		0		Carbamidomethyl [C56]
FALSE	High	Master Protein	P70288	Hdac2	Histone deacetylase 2 [OS=Mus musculus]	0	70.737	27	9	31	6	488	55.3	5.91	77.36			9			0	High	High	1	0		0		0		Carbamidomethyl [C13; C262]
FALSE	High	Master Protein	P70290	Mpp1	55 kDa erythrocyte membrane protein [OS=Mus musculus]	0	66.297	34	12	32	12	466	52.2	7.2	66.88			12			0	High	High	1	0		0		0		Carbamidomethyl [C179; C242]; Oxidation [M161]
FALSE	High	Master Protein	P70296	Pebp1	phosphatidylethanolamine-binding protein 1 [OS=Mus musculus]	0	230.428	91	15	90	15	187	20.8	5.4	267.68	15.7	10.35	13	1	2	0	High	High	1	0		1	Deamidated [N95]	0		Oxidation [M47; M92]; Deamidated [N95]; Carbamidomethyl [C13; C133; C168]; Met-loss+Acetyl [N-Term]
FALSE	High	Master Protein	P70297	Stam	signal transducing adapter molecule 1 [OS=Mus musculus]	0	40.503	17	7	11	5	548	59.7	4.84	25.79			7			0	High	High	1	0		0		0		Carbamidomethyl [C85]
FALSE	High	Master Protein	P70302	Stim1	stromal interaction molecule 1 [OS=Mus musculus]	0	23.33	9	5	5	5	685	77.5	6.54	7.38			5			0	High	Not Found	1	0		0		0
FALSE	High	Master Protein	P70303	Ctps2	CTP synthase 2 [OS=Mus musculus]	0	133.782	45	19	51	17	586	65.5	6.49	119.18	7.61		19	2		0	High	High	1	0		2	Deamidated [Q185; N427]	0		Deamidated [Q185; N427]; Carbamidomethyl [C216; C277; C299; C313; C362; C498]
FALSE	High	Master Protein	P70318	Tial1	Nucleolysin TIAR [OS=Mus musculus]	0	49.324	22	8	18	4	392	43.4	7.99	50.63			8			0	High	High	1	0		0		0
FALSE	High	Master Protein	P70333	Hnrnph2	heterogeneous nuclear ribonucleoprotein H2 [OS=Mus musculus]	0	116.335	30	12	70	4	449	49.2	6.3	149.01		2.3	11		1	0	High	High	1	1	Acetyl [N-Term]	0		0		Carbamidomethyl [C22; C34; C122; C267; C290]; Oxidation [M2; M271]; Acetyl [N-Term]
FALSE	High	Master Protein	P70336	Rock2	Rho-associated protein kinase 2 [OS=Mus musculus]	0	101.171	21	24	42	23	1388	160.5	5.99	78.92	2.06		24	1		0	High	High	1	0		1	Deamidated [N383]	0		Carbamidomethyl [C236; C247; C314; C330; C428; C761; C766; C804]; Deamidated [N383]; Oxidation [M237]
FALSE	High	Master Protein	P70340	Smad1	mothers against decapentaplegic homolog 1 [OS=Mus musculus]	0	34.566	26	9	17	2	465	52.1	7.31	26.32			9			0	High	High	1	0		0		0		Carbamidomethyl [C89; C121; C310; C360; C372]
FALSE	High	Master Protein	P70347	Tank	TRAF family member-associated NF-kappa-B activator [OS=Mus musculus]	0	6.381	5	2	3	2	448	50.9	5.88	3.92			2			0	High	Not Found	1	0		0		0
FALSE	High	Master Protein	P70349	Hint1	Histidine triad nucleotide-binding protein 1 [OS=Mus musculus]	0	151.139	85	12	43	12	126	13.8	6.87	125.28	7.32		11	1		0	High	High	1	0		1	Deamidated [Q62]	0		Carbamidomethyl [C38; C84]; Deamidated [Q62]; Met-loss+Acetyl [N-Term]; Oxidation [M96]
FALSE	High	Master Protein	P70353	Nfyc	Nuclear transcription factor Y subunit gamma [OS=Mus musculus]	0	7.134	6	2	3	2	335	37.2	4.98	4.42			2			0	High	High	1	0		0		0
FALSE	High	Master Protein	P70362	Ufd1	Ubiquitin recognition factor in ER-associated degradation protein 1 [OS=Mus musculus]	0	40.025	29	10	27	10	307	34.5	6.7	43.61			10			0	High	High	1	0		0		0
FALSE	High	Master Protein	P70372	Elavl1	ELAV-like protein 1 [OS=Mus musculus]	0	100.663	49	13	46	13	326	36.1	9.04	104.91			13			0	High	High	1	0		0		0		Carbamidomethyl [C13]; Met-loss+Acetyl [N-Term]
FALSE	High	Master Protein	P70388	Rad50	DNA repair protein Rad50 [OS=Mus musculus]	0	6.866	3	3	3	3	1312	153.4	6.95	0			3			0	High	Not Found	1	0		0		0
FALSE	High	Master Protein	P70398	Usp9x	Probable ubiquitin carboxyl-terminal hydrolase FAF-X [OS=Mus musculus]	0	358.335	28	66	141	65	2559	290.5	5.87	267.78	5.12		65	1		0	High	High	1	0		1	Deamidated [Q1845]	0		Carbamidomethyl [C159; C193; C540; C673; C683; C692; C787; C831; C842; C864; C1237; C1340; C1771; C1908; C2107; C2293]; Deamidated [Q1845]; Oxidation [M1956]
FALSE	High	Master Protein	P70404	Idh3g	Isocitrate dehydrogenase [NAD] subunit gamma 1, mitochondrial [OS=Mus musculus]	0	121.451	48	12	34	12	393	42.8	9.01	98.5	6.13		12	1		0	High	High	1	0		1	Deamidated [N358]	0		Deamidated [N358]; Carbamidomethyl [C81; C148; C235; C236; C333]
FALSE	High	Master Protein	P70428	Ext2	exostosin-2 [OS=Mus musculus]	0	5.351	3	2	4	2	718	82	6.65	3.72			2			0	High	High	1	0		0		0		Carbamidomethyl [C90]
FALSE	High	Master Protein	P70429	Evl	Ena/VASP-like protein [OS=Mus musculus]	0	5.325	5	2	3	1	414	44.3	8.85	5.07			2			0	Not Found	High	1	0		0		0		Carbamidomethyl [C7]; Met-loss+Acetyl [N-Term]
FALSE	High	Master Protein	P70434	Irf7	Interferon regulatory factor 7 [OS=Mus musculus]	0	4.386	4	2	3	2	457	51.2	6	2.06			2			0	High	Not Found	1	0		0		0
FALSE	High	Master Protein	P70441	Slc9a3r1	Na(+)/H(+) exchange regulatory cofactor NHE-RF1 [OS=Mus musculus]	0	84.626	53	13	32	13	355	38.6	5.9	77.9	2.53		13	1		0	High	High	1	0		1	Deamidated [Q243]	0		Carbamidomethyl [C201]; Met-loss+Acetyl [N-Term]; Deamidated [Q243]
FALSE	High	Master Protein	P70451	Fer	tyrosine-protein kinase Fer [OS=Mus musculus]	0	35.911	12	10	22	10	823	94.5	7.05	40.31			10			0	High	High	1	0		0		0		Carbamidomethyl [C594; C628; C691]
FALSE	High	Master Protein	P70452	Stx4	Syntaxin-4 [OS=Mus musculus]	0	42.253	28	8	14	8	298	34.1	6.14	37.23			8			0	High	High	1	0		0		0		Carbamidomethyl [C141]
FALSE	High	Master Protein	P70460	Vasp	Vasodilator-stimulated phosphoprotein [OS=Mus musculus]	0	120.234	50	15	50	15	375	39.6	8.53	122.25			15			0	High	High	1	0		0		0		Oxidation [M14]; Carbamidomethyl [C7; C64; C332]; Met-loss+Acetyl [N-Term]
FALSE	High	Master Protein	P70662	Ldb1	LIM domain-binding protein 1 [OS=Mus musculus]	0	10.557	8	3	3	3	411	46.5	6.96	5.2			3			0	High	High	1	0		0		0		Carbamidomethyl [C233]
FALSE	High	Master Protein	P70670	Naca	Nascent polypeptide-associated complex subunit alpha, muscle-specific form [OS=Mus musculus]	0	90.041	3	7	64	7	2187	220.4	9.35	150.97	9.24	2.47	5	1	1	0	High	High	1	0		1	Deamidated [Q2105]	0		Oxidation [M2157]; Deamidated [Q2105]
FALSE	High	Master Protein	P70671	Irf3	interferon regulatory factor 3 [OS=Mus musculus]	0	10.622	8	3	3	3	419	46.8	5.43	4.86			3			0	High	Not Found	1	0		0		0		Carbamidomethyl [C364]
FALSE	High	Master Protein	P70677	Casp3	Caspase-3 [OS=Mus musculus]	0	108.544	52	17	35	16	277	31.5	6.92	89.14			17			0	High	High	1	1	Acetyl [N-Term]	0		0		Oxidation [M79; M233]; Carbamidomethyl [C163; C170; C184; C264]; Acetyl [N-Term]
FALSE	High	Master Protein	P70697	Urod	Uroporphyrinogen decarboxylase [OS=Mus musculus]	0	8.756	5	2	3	2	367	40.7	6.65	5.09			2			0	High	Not Found	1	0		0		0
FALSE	High	Master Protein	P70698	Ctps1	CTP synthase 1 [OS=Mus musculus]	0	258.44	60	33	143	31	591	66.6	6.58	321.56		24.19	31		2	0	High	High	1	0		0		0		Carbamidomethyl [C176; C216; C218; C234; C243; C299; C362; C491]; Oxidation [M126; M436; M444; M448]
FALSE	High	Master Protein	P70699	Gaa	lysosomal alpha-glucosidase [OS=Mus musculus]	0	90.554	19	14	46	14	953	106.2	5.83	84.8			14			0	High	High	1	0		0		0		Oxidation [M408; M695]
FALSE	High	Master Protein	P80313	Cct7	T-complex protein 1 subunit eta [OS=Mus musculus]	0	251.41	60	34	200	34	544	59.6	7.84	400.98	18.84		33	3		0	High	High	1	1	Acetyl [N-Term]	2	Deamidated [Q331; N335]	0		Oxidation [M2; M227; M308; M382; M394; M414]; Carbamidomethyl [C29; C158; C310; C326; C345; C364; C370; C450]; Acetyl [N-Term]; Deamidated [Q331; N335]
FALSE	High	Master Protein	P80314	Cct2	T-complex protein 1 subunit beta [OS=Mus musculus]	0	310.66	54	30	159	30	535	57.4	6.4	313.46		3.12	29		1	0	High	High	1	0		0		0		Oxidation [M87; M244; M415; M417; M436]; Carbamidomethyl [C289; C395; C412]
FALSE	High	Master Protein	P80315	Cct4	T-complex protein 1 subunit delta [OS=Mus musculus]	0	352.234	69	38	268	37	539	58	8.02	548.79	9.89	5.29	37	1	1	0	High	High	1	0		2	Deamidated [Q350; N368]	0		Carbamidomethyl [C221; C252; C295; C337; C379; C410; C450]; Oxidation [M60; M81; M90; M260; M272; M446]; Met-loss [N-Term]; Deamidated [Q350; N368]
FALSE	High	Master Protein	P80316	Cct5	T-complex protein 1 subunit epsilon [OS=Mus musculus]	0	436.831	69	43	206	42	541	59.6	6.02	491.42	10.35	7.3	42	2	1	0	High	High	1	0		2	Deamidated [N55; Q435]	0		Carbamidomethyl [C253; C302; C407; C429; C440; C493]; Oxidation [M29; M91; M239; M269; M448; M501; M523]; Met-loss+Acetyl [N-Term]; Deamidated [N55; Q435]
FALSE	High	Master Protein	P80317	Cct6a	T-complex protein 1 subunit zeta [OS=Mus musculus]	0	206.825	43	28	196	28	531	58	7.08	299.6	6.35		28	1		0	High	High	1	0		0		0		Carbamidomethyl [C282]; Oxidation [M46]
FALSE	High	Master Protein	P80318	Cct3	T-complex protein 1 subunit gamma [OS=Mus musculus]	0	450.923	67	44	305	44	545	60.6	6.7	630.87	30.28	20.31	42	3	2	0	High	High	1	1	Acetyl [N-Term]	2	Deamidated [N188; N481]	0		Carbamidomethyl [C173; C213; C366; C372; C398; C455; C475]; Oxidation [M2; M49; M80; M128; M151; M305; M395; M416; M429]; Deamidated [N188; N481]; Acetyl [N-Term]
FALSE	High	Master Protein	P81069	Gabpb2	GA-binding protein subunit beta-2 [OS=Mus musculus]	0	8.226	12	3	3	3	414	45.6	4.91	1.68	2.9		2	1		0	Not Found	High	1	0		1	Deamidated [N217]	0		Deamidated [N217]; Met-loss+Acetyl [N-Term]
FALSE	High	Master Protein	P81117	Nucb2	Nucleobindin-2 [OS=Mus musculus]	0	19.095	12	5	7	5	420	50.3	5.15	4.9			5			0	High	High	1	0		0		0
FALSE	High	Master Protein	P81122	Irs2	Insulin receptor substrate 2 [OS=Mus musculus]	0	9.894	3	3	3	3	1321	136.7	8.69	0			3			0	High	High	1	0		0		0
FALSE	High	Master Protein	P83510	Tnik	Traf2 and NCK-interacting protein kinase [OS=Mus musculus]	0	19.247	4	7	11	2	1323	150.3	7.27	16.29			7			0	High	High	1	0		0		0
FALSE	High	Master Protein	P83741	Wnk1	Serine/threonine-protein kinase WNK1 [OS=Mus musculus]	0	124.409	15	32	52	32	2377	250.8	6.43	70.74	2.86		31	1		0	High	High	1	0		0		1	Phospho [S2027]	Carbamidomethyl [C352; C459; C547; C1130; C2032; C2287]; Phospho [S2027]
FALSE	High	Master Protein	P83870	Phf5a	PHD finger-like domain-containing protein 5A [OS=Mus musculus]	0	29.092	62	6	14	6	110	12.4	8.41	27.46			6			0	High	High	1	0		0		0		Carbamidomethyl [C11; C30; C33; C40; C46; C49; C58; C61; C72]
FALSE	High	Master Protein	P83882	Rpl36a	60S ribosomal protein L36a [OS=Mus musculus]	0	44.533	49	8	57	8	106	12.4	10.58	58.4	2.04		8	1		0	High	High	1	0		1	Deamidated [N76]	0		Carbamidomethyl [C72; C77]; Deamidated [N76]
FALSE	High	Master Protein	P83887	Tubg1	tubulin gamma-1 chain [OS=Mus musculus]	0	81.088	40	14	35	14	451	51.1	6.02	70.62	2.17		14	1		0	High	High	1	0		1	Deamidated [Q54]	0		Deamidated [Q54]; Carbamidomethyl [C26]
FALSE	High	Master Protein	P83917	Cbx1	Chromobox protein homolog 1 [OS=Mus musculus]	0	18.549	23	3	6	2	185	21.4	4.93	9.12			3			0	High	High	1	0		0		0
FALSE	High	Master Protein	P83940	Eloc	elongin-C [OS=Mus musculus]	0	105.815	66	9	55	9	112	12.5	4.78	104.48		2.49	7		2	0	High	High	1	0		0		0		Oxidation [M17; M45; M75]; Carbamidomethyl [C11; C74]
FALSE	High	Master Protein	P84084	Arf5	ADP-ribosylation factor 5 [OS=Mus musculus]	0	122.286	67	12	103	4	180	20.5	6.79	228.05	8.49	4.64	11	2	1	0	High	High	1	0		2	Deamidated [Q83; Q86]	0		Deamidated [Q83; Q86]; Oxidation [M22; M110; M130; M134]; Carbamidomethyl [C62]
FALSE	High	Master Protein	P84091	Ap2m1	AP-2 complex subunit mu [OS=Mus musculus]	0	114.015	45	19	56	19	435	49.6	9.54	108.47			19			0	High	High	1	0		0		0		Carbamidomethyl [C86; C212; C246; C251; C337]; Oxidation [M209; M388]
FALSE	High	Master Protein	P84096	Rhog	Rho-related GTP-binding protein RhoG [OS=Mus musculus]	0	95.508	63	11	27	10	191	21.3	8.12	80.18			11			0	High	High	1	0		0		0		Carbamidomethyl [C6; C102; C105; C157]
FALSE	High	Master Protein	P84099	Rpl19	60S ribosomal protein L19 [OS=Mus musculus]	0	98.746	37	10	58	10	196	23.5	11.47	133.46	6.42		10	1		0	High	High	1	0		1	Deamidated [N36]	0		Oxidation [M119]; Deamidated [N36]
FALSE	High	Master Protein	P84104	Srsf3	Serine/arginine-rich splicing factor 3 [OS=Mus musculus]	0	52.883	46	8	24	7	164	19.3	11.65	42.46	10.9		8	2		0	High	High	1	0		2	Deamidated [N20; N22]	0		Carbamidomethyl [C6; C10]; Deamidated [N20; N22]
FALSE	High	Master Protein	P84244	H3-3a	histone H3.3 [OS=Mus musculus]	0	7.455	17	3	9	3	136	15.3	11.27	8.54			3			0	High	High	1	0		0		0
FALSE	High	Master Protein	P97287	Mcl1	Induced myeloid leukemia cell differentiation protein Mcl-1 homolog [OS=Mus musculus]	0	9.903	9	2	4	2	331	35.2	6.2	2.51			2			0	High	High	1	0		0		0
FALSE	High	Master Protein	P97298	Serpinf1	Pigment epithelium-derived factor [OS=Mus musculus]	0	26.316	14	5	10	5	417	46.2	6.98	17.31			5			0	High	High	1	0		0		0		Carbamidomethyl [C260]
FALSE	High	Master Protein	P97300	Nptn	Neuroplastin [OS=Mus musculus]	0	105.339	18	8	37	8	397	44.3	7.74	94.64	3.05		8	1		0	High	High	1	0		1	Deamidated [Q252]	0		Carbamidomethyl [C217; C258]; Oxidation [M255; M256; M378]; Deamidated [Q252]
FALSE	High	Master Protein	P97310	Mcm2	DNA replication licensing factor mcm2 [OS=Mus musculus]	0	233.138	40	31	130	31	904	102	5.72	310.19	6.46		31	1		0	High	High	1	0		0		1	Phospho [S139]	Carbamidomethyl [C315; C522; C584; C624; C661]; Oxidation [M188; M674; M755]; Phospho [S139]; Met-loss+Acetyl [N-Term]
FALSE	High	Master Protein	P97311	Mcm6	DNA replication licensing factor MCM6 [OS=Mus musculus]	0	349.192	49	41	130	41	821	92.8	5.45	325.79	18.56		41	1		0	High	High	1	1	Acetyl [N-Term]	1	Deamidated [N697]	0		Deamidated [N697]; Carbamidomethyl [C91; C180; C301; C351; C393; C636; C637; C721]; Oxidation [M527; M734]; Acetyl [N-Term]
FALSE	High	Master Protein	P97313	Prkdc	DNA-dependent protein kinase catalytic subunit [OS=Mus musculus]	0.006	2.718	0	2	2	1	4128	471.2	7.12	1.62			2			0	Not Found	High	1	0		0		0
FALSE	High	Master Protein	P97314	Csrp2	Cysteine and glycine-rich protein 2 [OS=Mus musculus]	0	120.345	73	14	56	14	193	20.9	8.62	120.03			14			0	High	High	1	0		0		0		Carbamidomethyl [C25; C33; C34; C37; C40; C58; C122; C167]; Oxidation [M82]; Met-loss [N-Term]
FALSE	High	Master Protein	P97315	Csrp1	Cysteine and glycine-rich protein 1 [OS=Mus musculus]	0	163.504	65	14	93	14	193	20.6	8.57	218.62			14			0	High	High	1	0		0		0		Carbamidomethyl [C25; C34; C37; C40; C58; C122; C167]; Oxidation [M38]
FALSE	High	Master Protein	P97346	Nxn	nucleoredoxin [OS=Mus musculus]	0	56.752	30	11	25	11	435	48.3	4.93	61.91			11			0	High	High	1	0		0		0		Carbamidomethyl [C302]
FALSE	High	Master Protein	P97351	Rps3a	40S ribosomal protein S3a [OS=Mus musculus]	0	219.006	66	27	200	27	264	29.9	9.73	295.34	9.65	7	26	3	1	0	High	High	1	0		4	Deamidated [Q75; N95; N99; Q261]	0		Deamidated [Q75; N95; N99; Q261]; Carbamidomethyl [C96; C111; C139; C201]; Oxidation [M38; M103; M168; M169; M172; M229]
FALSE	High	Master Protein	P97355	Sms	Spermine synthase [OS=Mus musculus]	0	39.607	26	9	22	9	366	41.3	5.06	26.64	3.62		9	1		0	High	High	1	0		1	Deamidated [Q74]	0		Carbamidomethyl [C229; C237; C337]; Deamidated [Q74]
FALSE	High	Master Protein	P97360	Etv6	Transcription factor ETV6 [OS=Mus musculus]	0	5.192	3	2	2	2	485	56.4	7.33	0			2			0	High	High	1	0		0		0
FALSE	High	Master Protein	P97363	Sptlc2	Serine palmitoyltransferase 2 [OS=Mus musculus]	0	12.61	8	4	6	4	560	62.9	8.18	9.71			4			0	High	High	1	0		0		0
FALSE	High	Master Protein	P97370	Atp1b3	sodium/potassium-transporting ATPase subunit beta-3 [OS=Mus musculus]	0	65.218	42	10	38	10	278	31.8	8.51	57.56		7.49	9		1	0	High	High	1	0		0		0		Carbamidomethyl [C144; C154; C170; C191; C249]
FALSE	High	Master Protein	P97371	Psme1	Proteasome activator complex subunit 1 [OS=Mus musculus]	0	65.462	40	10	26	10	249	28.7	5.97	59.33			10			0	High	High	1	0		0		0		Carbamidomethyl [C22]
FALSE	High	Master Protein	P97372	Psme2	proteasome activator complex subunit 2 [OS=Mus musculus]	0	31.365	25	7	19	7	239	27	5.76	21.5			7			0	High	High	1	0		0		0		Carbamidomethyl [C91]
FALSE	High	Master Protein	P97376	Frg1	Protein FRG1 [OS=Mus musculus]	0	54.22	43	10	26	10	258	29.1	8.92	46.9			10			0	High	High	1	0		0		0		Carbamidomethyl [C155; C159; C205]
FALSE	High	Master Protein	P97377	Cdk2	cyclin-dependent kinase 2 [OS=Mus musculus]	0	68.946	33	12	30	10	346	39	8.54	67.34			12			0	High	High	1	0		0		0
FALSE	High	Master Protein	P97379	G3bp2	Ras GTPase-activating protein-binding protein 2 [OS=Mus musculus]	0	112.354	38	15	57	1	482	54.1	5.62	104.89		2.39	14		1	0	High	High	1	0		0		0		Met-loss [N-Term]; Oxidation [M3]; Carbamidomethyl [C73]
FALSE	High	Master Protein	P97384	Anxa11	annexin A11 [OS=Mus musculus]	0	42.362	23	12	28	11	503	54	7.66	47.2			12			0	High	High	1	0		0		0		Carbamidomethyl [C382]
FALSE	High	Master Protein	P97386	Lig3	DNA ligase 3 [OS=Mus musculus]	0	12.26	4	4	7	4	1015	113	8.98	6.47			4			0	High	High	1	0		0		0
FALSE	High	Master Protein	P97390	Vps45	Vacuolar protein sorting-associated protein 45 [OS=Mus musculus]	0	27.69	12	6	14	6	570	65	8.25	18.41			6			0	High	High	1	0		0		0
FALSE	High	Master Protein	P97393	Arhgap5	Rho GTPase-activating protein 5 [OS=Mus musculus]	0	13.679	3	5	5	5	1501	172	6.34	1.89			5			0	High	High	1	0		0		0		Carbamidomethyl [C201; C204]
FALSE	High	Master Protein	P97429	Anxa4	annexin A4 [OS=Mus musculus]	0	142.413	54	20	72	20	319	35.9	5.57	165.49			20			0	High	High	1	0		0		0		Carbamidomethyl [C108; C141; C198]
FALSE	High	Master Protein	P97434	Mprip	Myosin phosphatase Rho-interacting protein [OS=Mus musculus]	0	135.171	31	26	38	25	1024	116.3	6.21	71.33			26			0	High	High	1	0		0		0		Carbamidomethyl [C120; C723; C830]
FALSE	High	Master Protein	P97440	Slbp	Histone RNA hairpin-binding protein [OS=Mus musculus]	0	9.594	8	2	6	2	275	31.6	6.8	7.69			2			0	High	High	1	0		0		0		Carbamidomethyl [C72]
FALSE	High	Master Protein	P97447	Fhl1	Four and a half LIM domains protein 1 [OS=Mus musculus]	0	124.868	60	16	56	16	280	31.9	8.37	105.54		0	15		1	0	High	High	1	0		0		0		Carbamidomethyl [C31; C36; C40; C43; C65; C71; C126; C129; C132; C150; C153; C185; C188; C191; C209; C212; C249; C252; C273; C276]
FALSE	High	Master Protein	P97452	Bop1	Ribosome biogenesis protein BOP1 [OS=Mus musculus]	0	24.651	10	6	11	6	732	82.5	6.28	20.14			6			0	High	High	1	0		0		0		Carbamidomethyl [C5]; Met-loss+Acetyl [N-Term]
FALSE	High	Master Protein	P97454	Smad5	mothers against decapentaplegic homolog 5 [OS=Mus musculus]	0	45.368	29	11	21	4	465	52.1	7.71	41.16			11			0	High	High	1	0		0		0		Carbamidomethyl [C90; C122; C310; C360; C372; C378]
FALSE	High	Master Protein	P97461	Rps5	40S ribosomal protein S5 [OS=Mus musculus]	0	92.554	36	12	94	12	204	22.9	9.72	144.74			12			0	High	High	1	1	Acetyl [N-Term]	0		0		Carbamidomethyl [C66; C155]; Oxidation [M76; M77; M78]; Met-loss+Acetyl [N-Term]; Acetyl [N-Term]
FALSE	High	Master Protein	P97465	Dok1	docking protein 1 [OS=Mus musculus]	0	57.545	33	11	26	11	482	52.4	6.57	43.86	2.89		10	1		0	High	High	1	0		1	Deamidated [Q344]	0		Carbamidomethyl [C168; C388; C464]; Deamidated [Q344]
FALSE	High	Master Protein	P97470	Ppp4c	Serine/threonine-protein phosphatase 4 catalytic subunit [OS=Mus musculus]	0	72.893	44	11	26	9	307	35.1	5.06	67.3	5.74		10	2		0	High	High	1	0		2	Deamidated [Q184; Q239]	0		Deamidated [Q184; Q239]; Carbamidomethyl [C17; C130; C162; C193]; Met-loss+Acetyl [N-Term]
FALSE	High	Master Protein	P97471	Smad4	Mothers against decapentaplegic homolog 4 [OS=Mus musculus]	0	29.534	11	6	12	6	551	60.3	6.99	23.02			6			0	High	High	1	0		0		0		Carbamidomethyl [C115; C123; C127; C362; C522]
FALSE	High	Master Protein	P97473	Tarbp2	RISC-loading complex subunit TARBP2 [OS=Mus musculus]	0	12.362	12	5	5	5	365	38.8	6.01	2.03			5			0	High	High	1	0		0		0		Carbamidomethyl [C195; C262]
FALSE	High	Master Protein	P97480	Eya3	eyes absent homolog 3 [OS=Mus musculus]	0.002	3.636	5	2	2	2	510	55.9	5.19	1.99			2			0	Not Found	High	1	0		0		0
FALSE	High	Master Protein	P97494	Gclc	glutamate--cysteine ligase catalytic subunit [OS=Mus musculus]	0	78.382	28	14	28	14	637	72.5	5.9	60.04			14			0	High	High	1	0		0		0		Carbamidomethyl [C142; C152; C295; C553]; Met-loss [N-Term]
FALSE	High	Master Protein	P97496	Smarcc1	SWI/SNF complex subunit SMARCC1 [OS=Mus musculus]	0	47.826	11	10	19	6	1104	122.8	5.73	43.48			10			0	High	High	1	0		0		0		Carbamidomethyl [C107; C118; C510; C656]
FALSE	High	Master Protein	P97499	Tep1	Telomerase protein component 1 [OS=Mus musculus]	0	5.072	1	2	2	2	2629	291.3	7.24	0			2			0	Not Found	High	1	0		0		0		Carbamidomethyl [C2425]
FALSE	High	Master Protein	P97742	Cpt1a	Carnitine O-palmitoyltransferase 1, liver isoform [OS=Mus musculus]	0	101.083	29	21	45	21	773	88.2	8.62	68.99			21			0	High	High	1	0		0		0		Carbamidomethyl [C32; C304; C608; C613]
FALSE	High	Master Protein	P97760	Polr2c	DNA-directed RNA polymerase II subunit RPB3 [OS=Mus musculus]	0	23.866	22	4	9	4	275	31.4	4.92	16.11			4			0	High	High	1	0		0		0
FALSE	High	Master Protein	P97765	Wbp2	WW domain-binding protein 2 [OS=Mus musculus]	0	25.45	13	4	17	4	261	28	6.33	45.05			4			0	High	High	1	0		0		0		Carbamidomethyl [C80]
FALSE	High	Master Protein	P97770	Thumpd3	THUMP domain-containing protein 3 [OS=Mus musculus]	0	40.308	23	10	18	10	505	56.4	7.43	19.25			10			0	High	High	1	0		0		0		Carbamidomethyl [C12; C428]
FALSE	High	Master Protein	P97789	Xrn1	5'-3' exoribonuclease 1 [OS=Mus musculus]	0	64.879	10	14	24	14	1719	194.2	7.5	37.88			14			0	High	High	1	0		0		0		Carbamidomethyl [C1500]
FALSE	High	Master Protein	P97792	Cxadr	Coxsackievirus and adenovirus receptor homolog [OS=Mus musculus]	0	30.82	25	7	18	7	365	39.9	6.96	28.58			7			0	High	High	1	0		0		0		Carbamidomethyl [C146; C223]
FALSE	High	Master Protein	P97801	Smn1	Survival motor neuron protein [OS=Mus musculus]	0	13.235	16	3	9	3	288	31.2	7.62	3.91			3			0	High	High	1	0		0		0		Carbamidomethyl [C57; C95; C104]
FALSE	High	Master Protein	P97807	Fh	fumarate hydratase, mitochondrial [OS=Mus musculus]	0	105.348	32	13	52	13	507	54.3	9.04	144.95			13			0	High	High	1	0		0		0		Oxidation [M161]
FALSE	High	Master Protein	P97820	Map4k4	Mitogen-activated protein kinase kinase kinase kinase 4 [OS=Mus musculus]	0	52.563	10	12	19	7	1233	140.5	7.47	35.49	3		12	1		0	High	High	1	0		1	Deamidated [Q632]	0		Deamidated [Q632]
FALSE	High	Master Protein	P97822	Anp32e	Acidic leucine-rich nuclear phosphoprotein 32 family member E [OS=Mus musculus]	0	80.179	36	7	23	7	260	29.6	3.88	85.87		0	6		1	0	High	High	1	0		0		0		Carbamidomethyl [C87; C123]
FALSE	High	Master Protein	P97823	Lypla1	Acyl-protein thioesterase 1 [OS=Mus musculus]	0	10.279	16	3	9	3	230	24.7	6.62	9.99			3			0	High	High	1	0		0		0		Carbamidomethyl [C211]
FALSE	High	Master Protein	P97825	Jpt1	Jupiter microtubule associated homolog 1 [OS=Mus musculus]	0	94.797	57	6	23	6	154	16.1	5.31	81.84	8.55		6	2		0	High	High	1	0		1	Deamidated [N29]	0		Oxidation [M47]; Met-loss+Acetyl [N-Term]; Deamidated [N29]
FALSE	High	Master Protein	P97855	G3bp1	Ras GTPase-activating protein-binding protein 1 [OS=Mus musculus]	0	246.447	52	20	152	19	465	51.8	5.59	322.97	41.48	2.05	19	4	1	0	High	High	1	0		2	Deamidated [N48; N128]	1	Phospho [S231]	Oxidation [M3; M29; M66; M109; M399]; Deamidated [N48; N128]; Carbamidomethyl [C73]; Met-loss [N-Term]; Phospho [S231]
FALSE	High	Master Protein	P97863	Nfib	Nuclear factor 1 B-type [OS=Mus musculus]	0	6.859	4	2	3	1	570	63.5	8.66	2.56			2			0	High	High	1	0		0		0
FALSE	High	Master Protein	P97930	Dtymk	thymidylate kinase [OS=Mus musculus]	0	27.645	33	7	14	7	212	23.9	7.9	14.13			7			0	High	High	1	0		0		0		Carbamidomethyl [C31; C117]
FALSE	High	Master Protein	P97946	Vegfd	Vascular endothelial growth factor D [OS=Mus musculus]	0	6.54	6	2	2	2	358	40.9	6.71	1.66			2			0	High	High	1	0		0		0		Carbamidomethyl [C220]
FALSE	High	Master Protein	P98063	Bmp1	Bone morphogenetic protein 1 [OS=Mus musculus]	0	16.294	6	6	8	6	991	111.6	6.95	0			6			0	High	High	1	0		0		0		Carbamidomethyl [C515; C592; C596]
FALSE	High	Master Protein	P98078	Dab2	Disabled homolog 2 [OS=Mus musculus]	0	114.067	35	20	56	20	766	82.3	6.1	112.26		6.52	19		1	0	High	High	1	0		0		0		Carbamidomethyl [C138; C263]; Met-loss+Acetyl [N-Term]
FALSE	High	Master Protein	P98083	Shc1	SHC-transforming protein 1 [OS=Mus musculus]	0	79.761	20	9	22	9	579	62.6	6.54	49.71	3.48		9	1		0	High	High	1	0		1	Deamidated [N447]	0		Carbamidomethyl [C169; C196]; Deamidated [N447]
FALSE	High	Master Protein	P98192	Gnpat	Dihydroxyacetone phosphate acyltransferase [OS=Mus musculus]	0	10.257	6	5	8	5	678	76.8	8.13	4.07			5			0	High	High	1	0		0		0		Carbamidomethyl [C53; C539; C543]
FALSE	High	Master Protein	P99024	Tubb5	tubulin beta-5 chain [OS=Mus musculus]	0	689.566	76	49	833	8	444	49.6	4.89	1865.46	69.22	84.42	34	7	15	0	High	High	1	0		13	Deamidated [Q11; Q15; Q43; Q83; N89; Q94; N99; N100; Q134; N332; N335; N337; N347]	0		Oxidation [M1; M73; N99; N100; M147; M164; M233; M257; M267; M299; M300; M321; M323; M330; M363; M388]; Carbamidomethyl [C12; C127; C129; C239; C303; C354]; Deamidated [Q11; Q15; Q43; Q83; N89; Q94; N99; N100; Q134; N332; N335; N337; N347]
FALSE	High	Master Protein	P99026	Psmb4	Proteasome subunit beta type-4 [OS=Mus musculus]	0	104.787	34	7	31	7	264	29.1	5.64	82.61	8.23		7	2		0	High	High	1	0		0		0		Oxidation [M50; M115]
FALSE	High	Master Protein	P99027	Rplp2	60S acidic ribosomal protein P2 [OS=Mus musculus]	0	107.197	83	9	35	9	115	11.6	4.54	104.35			9			0	High	High	1	0		0		0
FALSE	High	Master Protein	P99028	Uqcrh	Cytochrome b-c1 complex subunit 6, mitochondrial [OS=Mus musculus]	0	13.294	49	3	6	3	89	10.4	4.87	3.33		5.39	2		1	0	High	High	1	0		0		0		Carbamidomethyl [C51; C65]
FALSE	High	Master Protein	P99029	Prdx5	Peroxiredoxin-5, mitochondrial [OS=Mus musculus]	0	62.476	47	10	37	10	210	21.9	8.85	78.19			10			0	High	High	1	0		0		0		Carbamidomethyl [C96]
FALSE	High	Master Protein	Q00422	Gabpa	GA-binding protein alpha chain [OS=Mus musculus]	0	46.819	28	11	17	11	454	51.3	5	33.52			11			0	High	High	1	0		0		0		Carbamidomethyl [C223; C388; C401; C421]
FALSE	High	Master Protein	Q00493	Cpe	Carboxypeptidase E [OS=Mus musculus]	0	26.075	17	6	8	6	476	53.2	5.19	8.73			6			0	Not Found	High	1	0		0		0		Carbamidomethyl [C272; C300]
FALSE	High	Master Protein	Q00519	Xdh	Xanthine dehydrogenase/oxidase [OS=Mus musculus]	0	240.087	28	31	104	31	1335	146.5	7.56	220.68		4.93	30		1	0	High	High	1	0		0		0		Carbamidomethyl [C46; C51; C54; C150; C171; C172; C181; C182; C538; C665; C828; C970; C974; C1002; C1312; C1320; C1328]; Oxidation [M387; M621; M888]
FALSE	High	Master Protein	Q00560	Il6st	Interleukin-6 receptor subunit beta [OS=Mus musculus]	0	37.588	12	7	15	7	917	102.4	5.52	32.53			7			0	High	High	1	0		0		0		Carbamidomethyl [C172; C817; C823]
FALSE	High	Master Protein	Q00612	G6pdx	Glucose-6-phosphate 1-dehydrogenase X [OS=Mus musculus]	0	309.697	66	41	186	41	515	59.2	6.49	375.04	3.53	7.95	39	1	2	0	High	High	1	0		1	Deamidated [N414]	0		Carbamidomethyl [C13; C158; C232; C385; C446]; Oxidation [M125; M132; M159; M207; M212; M411; M496]; Deamidated [N414]; Met-loss+Acetyl [N-Term]
FALSE	High	Master Protein	Q00780	Col8a1	collagen alpha-1(VIII) chain [OS=Mus musculus]	0	13.707	3	2	5	2	744	73.6	9.55	11.54			2			0	High	High	1	0		0		0
FALSE	High	Master Protein	Q00915	Rbp1	Retinol-binding protein 1 [OS=Mus musculus]	0	25.738	38	4	9	4	135	15.8	5.25	16.09			4			0	High	High	1	0		0		0		Carbamidomethyl [C83; C96]; Met-loss [N-Term]
FALSE	High	Master Protein	Q00993	Axl	Tyrosine-protein kinase receptor UFO [OS=Mus musculus]	0	45.99	13	9	13	8	888	98.1	5.74	32.1			9			0	High	High	1	0		0		0		Carbamidomethyl [C768; C779; C846; C848]
FALSE	High	Master Protein	Q00PI9	Hnrnpul2	heterogeneous nuclear ribonucleoprotein U-like protein 2 [OS=Mus musculus]	0	13.145	5	3	4	3	745	84.9	4.89	5.36			3			0	High	High	1	0		0		0		Carbamidomethyl [C516; C536]
FALSE	High	Master Protein	Q01063	Pde4d	cAMP-specific 3',5'-cyclic phosphodiesterase 4D [OS=Mus musculus]	0	17.056	7	6	9	6	747	84.5	4.91	3.78			6			0	High	High	1	0		0		0
FALSE	High	Master Protein	Q01149	Col1a2	Collagen alpha-2(I) chain [OS=Mus musculus]	0	153.961	20	18	46	18	1372	129.5	9.19	75.73	18.16		18	5		0	High	High	1	0		2	Deamidated [Q1035; N1189]	0		Oxidation [P600; P684; P690; P957; K980; P1038; M1194; M1256; M1263]; Carbamidomethyl [C1192; C1323; C1370]; Deamidated [Q1035; N1189]
FALSE	High	Master Protein	Q01279	Egfr	epidermal growth factor receptor [OS=Mus musculus]	0	24.437	5	5	8	5	1210	134.8	6.86	11.6			5			0	High	High	1	0		0		0		Carbamidomethyl [C248; C251; C307]
FALSE	High	Master Protein	Q01320	Top2a	DNA topoisomerase 2-alpha [OS=Mus musculus]	0	34.788	7	11	18	11	1528	172.7	8.6	24.96			11			0	High	High	1	0		0		0		Carbamidomethyl [C169; C391; C732]
FALSE	High	Master Protein	Q01341	Adcy6	Adenylate cyclase type 6 [OS=Mus musculus]	0	9.448	2	2	3	2	1165	130.2	7.87	4.5			2			0	High	High	1	0		0		0		Carbamidomethyl [C1142]
FALSE	High	Master Protein	Q01405	Sec23a	protein transport protein Sec23A [OS=Mus musculus]	0	185.52	34	21	74	18	765	86.1	7.08	182.23	9.45		21	2		0	High	High	1	0		3	Deamidated [N595; Q686; Q693]	0		Carbamidomethyl [C61; C74; C85; C88; C180; C350; C423; C432; C444]; Deamidated [N595; Q686; Q693]
FALSE	High	Master Protein	Q01730	Rsu1	Ras suppressor protein 1 [OS=Mus musculus]	0	49.662	37	12	27	12	277	31.5	8.88	40.62			12			0	High	High	1	0		0		0
FALSE	High	Master Protein	Q01768	Nme2	nucleoside diphosphate kinase b [OS=Mus musculus]	0	184.475	78	19	149	10	152	17.4	7.5	304.95		35.3	12		7	0	High	High	1	0		0		0		Carbamidomethyl [C109]; Oxidation [M76; M90]
FALSE	High	Master Protein	Q01853	Vcp	Transitional endoplasmic reticulum ATPase [OS=Mus musculus]	0	640.936	68	59	316	58	806	89.3	5.26	780.33	15.84	23.56	54	3	5	0	High	High	1	0		3	Deamidated [Q494; N602; N680]	0		Carbamidomethyl [C105; C174; C184; C209; C415; C522; C535; C691]; Oxidation [M46; M219; M508; M608; M611; M678; M720; M740; M757]; Deamidated [Q494; N602; N680]; Met-loss+Acetyl [N-Term]
FALSE	High	Master Protein	Q02053	Uba1	Ubiquitin-like modifier-activating enzyme 1 [OS=Mus musculus]	0	618.783	60	59	308	59	1058	117.7	5.66	724.73	48.7	45.22	49	9	8	0	High	High	1	0		5	Deamidated [N44; Q115; Q375; N856; N966]	0		Deamidated [N44; Q115; Q375; N856; N966]; Carbamidomethyl [C179; C234; C262; C278; C340; C481; C632; C706; C711; C719]; Oxidation [M67; M69; M317; M539; M970; M1015]
FALSE	High	Master Protein	Q02248	Ctnnb1	Catenin beta-1 [OS=Mus musculus]	0	89.429	27	18	30	14	781	85.4	5.86	56.26			18			0	High	High	1	0		0		0		Carbamidomethyl [C381; C466; C520; C619]; Oxidation [M202]
FALSE	High	Master Protein	Q02257	Jup	Junction plakoglobin [OS=Mus musculus]	0	65.724	19	12	29	8	745	81.7	6.14	48.66			12			0	High	High	1	0		0		0		Oxidation [M180; M193]; Carbamidomethyl [C372; C609]
FALSE	High	Master Protein	Q02614	Sap30bp	SAP30-binding protein [OS=Mus musculus]	0	9.053	4	2	3	2	308	33.8	4.87	0			2			0	Not Found	High	1	0		0		0
FALSE	High	Master Protein	Q02788	Col6a2	Collagen alpha-2(VI) chain [OS=Mus musculus]	0	85.919	20	19	36	19	1034	110.3	6.42	54			19			0	High	High	1	0		0		0		Carbamidomethyl [C261; C266]
FALSE	High	Master Protein	Q03145	Epha2	Ephrin type-A receptor 2 [OS=Mus musculus]	0	100.711	23	21	53	19	977	108.8	6.23	82.97			21			0	High	High	1	0		0		0		Carbamidomethyl [C104; C114; C200; C277; C613; C754]
FALSE	High	Master Protein	Q03147	Cdk7	Cyclin-dependent kinase 7 [OS=Mus musculus]	0	11.858	13	4	8	4	346	38.9	8.47	11.93			4			0	High	High	1	0		0		0
FALSE	High	Master Protein	Q03173	Enah	Protein enabled homolog [OS=Mus musculus]	0	113.599	19	15	45	14	802	85.8	7.72	103.22	4.76		15	1		0	High	High	1	0		1	Deamidated [N152]	0		Carbamidomethyl [C7; C62]; Met-loss+Acetyl [N-Term]; Deamidated [N152]
FALSE	High	Master Protein	Q03265	Atp5f1a	ATP synthase subunit alpha, mitochondrial [OS=Mus musculus]	0	332.036	57	37	232	37	553	59.7	9.19	561.66	17.46	20.77	31	2	6	0	High	High	1	0		2	Deamidated [N108; N303]	0		Deamidated [N108; N303]; Oxidation [M51; M105; M324]; Carbamidomethyl [C294]
FALSE	High	Master Protein	Q03350	Thbs2	Thrombospondin-2 [OS=Mus musculus]	0	28.012	5	5	13	4	1172	129.8	4.82	29.34			5			0	High	High	1	0		0		0
FALSE	High	Master Protein	Q03963	Eif2ak2	interferon-induced, double-stranded RNA-activated protein kinase [OS=Mus musculus]	0	125.295	31	18	40	18	515	58.2	8.57	74.01			18			0	High	High	1	0		0		0		Carbamidomethyl [C116]; Oxidation [M136]; Met-loss+Acetyl [N-Term]
FALSE	High	Master Protein	Q04207	Rela	Transcription factor p65 [OS=Mus musculus]	0	44.888	22	10	34	9	549	60.2	5.76	67.68			10			0	High	High	1	0		0		0		Carbamidomethyl [C105; C120]
FALSE	High	Master Protein	Q04690	Nf1	Neurofibromin [OS=Mus musculus]	0	37.124	5	14	18	14	2841	319.4	7.39	15.06			14			0	High	High	1	0		0		0		Carbamidomethyl [C454; C491; C716]
FALSE	High	Master Protein	Q04692	Smarcad1	SWI/SNF-related matrix-associated actin-dependent regulator of chromatin subfamily A containing DEAD/H box 1 [OS=Mus musculus]	0	27.553	7	6	10	6	1021	116.4	5.68	15.91			6			0	High	High	1	0		0		0		Carbamidomethyl [C82; C856]
FALSE	High	Master Protein	Q04735	Cdk16	Cyclin-dependent kinase 16 [OS=Mus musculus]	0	30.58	20	9	16	3	496	55.9	7.87	22.03			9			0	High	High	1	0		0		0		Carbamidomethyl [C206]
FALSE	High	Master Protein	Q04736	Yes1	tyrosine-protein kinase Yes [OS=Mus musculus]	0	17.206	8	5	13	1	541	60.6	6.64	19.3			5			0	High	Not Found	1	0		0		0
FALSE	High	Master Protein	Q04750	Top1	DNA topoisomerase 1 [OS=Mus musculus]	0	58.787	18	12	20	12	767	90.8	9.33	29.89			12			0	High	High	1	0		0		0		Carbamidomethyl [C302; C343; C506; C507]
FALSE	High	Master Protein	Q04857	Col6a1	Collagen alpha-1(VI) chain [OS=Mus musculus]	0	168.652	31	24	69	24	1025	108.4	5.36	147.64			24			0	High	High	1	0		0		0		Carbamidomethyl [C130; C168; C246; C247; C251; C593]
FALSE	High	Master Protein	Q04863	Relb	Transcription factor RelB [OS=Mus musculus]	0	10.34	4	2	4	2	558	60.3	5.76	5.24			2			0	High	High	1	0		0		0
FALSE	High	Master Protein	Q05186	Rcn1	Reticulocalbin-1 [OS=Mus musculus]	0	128.08	55	17	46	17	325	38.1	4.84	115.78			17			0	High	High	1	0		0		0
FALSE	High	Master Protein	Q05512	Mark2	Serine/threonine-protein kinase MARK2 [OS=Mus musculus]	0	39.72	13	8	11	8	776	86.3	9.67	23.4			8			0	High	High	1	0		0		0		Carbamidomethyl [C711]
FALSE	High	Master Protein	Q05769	Ptgs2	Prostaglandin G/H synthase 2 [OS=Mus musculus]	0	108.204	41	17	37	16	604	69	7.37	86.06		4.67	16		1	0	High	High	1	0		0		0		Carbamidomethyl [C21; C22; C26; C32; C145; C526; C555; C561]
FALSE	High	Master Protein	Q05793	Hspg2	Basement membrane-specific heparan sulfate proteoglycan core protein [OS=Mus musculus]	0	182.472	12	32	63	32	3707	398	6.32	103.01	3.36		32	1		0	High	High	1	0		1	Deamidated [Q1366]	0		Carbamidomethyl [C479; C733; C742; C745; C795; C811; C814; C816; C869; C903; C906; C1137; C1140; C1249; C1263; C1530; C1628; C1697; C1792; C1886; C1932; C2021; C2456; C2506]; Deamidated [Q1366]
FALSE	High	Master Protein	Q05816	Fabp5	Fatty acid-binding protein, epidermal [OS=Mus musculus]	0	355.056	87	21	218	21	135	15.1	6.54	505.16	15.37	37.09	17	3	4	0	High	High	1	0		4	Deamidated [N50; N68; N123; N124]	0		Carbamidomethyl [C43; C47; C67; C87; C120; C127]; Oxidation [M14; M23; M35; M38; M116; M122]; Deamidated [N50; N68; N123; N124]; Met-loss+Acetyl [N-Term]
FALSE	High	Master Protein	Q05860	Fmn1	Isoform 5 of Formin-1 [OS=Mus musculus]	0	8.468	4	4	5	4	1204	133.1	5.71	3.39	3.92		3	1		0	High	High	1	1	Acetyl [N-Term]	1	Deamidated [Q27]	0		Deamidated [Q27]; Acetyl [N-Term]
FALSE	High	Master Protein	Q05895	Thbs3	Thrombospondin-3 [OS=Mus musculus]	0	4.774	2	2	3	1	956	104.1	4.64	3.97			2			0	High	Not Found	1	0		0		0
FALSE	High	Master Protein	Q05920	Pc	pyruvate carboxylase, mitochondrial [OS=Mus musculus]	0	38.466	10	10	16	10	1178	129.6	6.71	23.45			10			0	High	High	1	0		0		0		Carbamidomethyl [C131]
FALSE	High	Master Protein	Q05BC3	Eml1	Echinoderm microtubule-associated protein-like 1 [OS=Mus musculus]	0	94.726	35	23	52	22	814	89.6	7.02	71.67	3.4		23	1		0	High	High	1	0		1	Deamidated [Q587]	0		Carbamidomethyl [C754; C769; C793]; Deamidated [Q587]
FALSE	High	Master Protein	Q05CL8	Larp7	La-related protein 7 [OS=Mus musculus]	0	48.571	19	11	22	11	570	64.8	9.54	40.23			11			0	High	High	1	0		0		0		Carbamidomethyl [C243]
FALSE	High	Master Protein	Q05D44	Eif5b	Eukaryotic translation initiation factor 5B [OS=Mus musculus]	0	236.909	32	35	95	35	1216	137.5	5.59	230.98	19.47		33	2		0	High	High	1	0		0		1	Phospho [S137]	Carbamidomethyl [C631; C745; C1088; C1122]; Phospho [S137]; Oxidation [M694; M1121]
FALSE	High	Master Protein	Q06138	Cab39	Calcium-binding protein 39 [OS=Mus musculus]	0	37.309	20	7	13	7	341	39.8	6.89	24.73			7			0	High	High	1	0		0		0
FALSE	High	Master Protein	Q06180	Ptpn2	Tyrosine-protein phosphatase non-receptor type 2 [OS=Mus musculus]	0	39.489	26	11	20	11	406	47.3	8.37	29.32			11			0	High	High	1	0		0		0		Carbamidomethyl [C16; C301]
FALSE	High	Master Protein	Q07076	Anxa7	Annexin A7 [OS=Mus musculus]	0	114.523	39	19	68	19	463	49.9	6.18	105.04			19			0	High	High	1	0		0		0		Carbamidomethyl [C260; C273; C302; C338; C388]; Oxidation [M301; M341; M432; M436; M444]
FALSE	High	Master Protein	Q07113	Igf2r	Cation-independent mannose-6-phosphate receptor [OS=Mus musculus]	0	269.686	22	46	110	46	2483	273.6	5.71	231.43	14.09	5.67	45	2	1	0	High	High	1	0		2	Deamidated [N537; N1513]	0		Carbamidomethyl [C129; C144; C169; C313; C513; C525; C532; C566; C724; C807; C816; C1035; C1326; C1401; C1469; C1509; C1849; C1910; C1935; C2032; C2089]; Deamidated [N537; N1513]
FALSE	High	Master Protein	Q07139	Ect2	Protein ECT2 [OS=Mus musculus]	0.001	4.231	2	2	4	2	913	103.1	7.44	2.27			2			0	High	High	1	0		0		0
FALSE	High	Master Protein	Q07235	Serpine2	Glia-derived nexin [OS=Mus musculus]	0	5.1	6	2	3	2	397	44.2	9.85	2.1			2			0	High	High	1	0		0		0
FALSE	High	Master Protein	Q07417	Acads	Short-chain specific acyl-CoA dehydrogenase, mitochondrial [OS=Mus musculus]	0	102.975	43	15	41	15	412	44.9	8.47	96.53			15			0	High	High	1	0		0		0		Carbamidomethyl [C151; C246; C289]
FALSE	High	Master Protein	Q07797	Lgals3bp	Galectin-3-binding protein [OS=Mus musculus]	0	98.769	24	11	16	11	577	64.5	5.14	59.4			11			0	High	Not Found	1	0		0		0		Carbamidomethyl [C93; C103; C243; C553]
FALSE	High	Master Protein	Q07813	Bax	Apoptosis regulator BAX [OS=Mus musculus]	0	25.145	20	4	8	4	192	21.4	4.98	25.75			4			0	High	High	1	0		0		0
FALSE	High	Master Protein	Q07832	Plk1	Serine/threonine-protein kinase PLK1 [OS=Mus musculus]	0	23.645	11	6	7	6	603	68.3	8.72	8.59			6			0	High	High	1	0		0		0		Carbamidomethyl [C164]
FALSE	High	Master Protein	Q08024	Cbfb	Isoform 2 of Core-binding factor subunit beta [OS=Mus musculus]	0	49.021	32	7	24	7	182	21.5	6.8	50.77	2.43		7	1		0	High	High	1	0		1	Deamidated [Q134]	0		Deamidated [Q134]; Carbamidomethyl [C124]
FALSE	High	Master Protein	Q08091	Cnn1	Calponin-1 [OS=Mus musculus]	0	62.693	38	10	29	10	297	33.3	8.97	49.35			10			0	High	High	1	0		0		0		Carbamidomethyl [C61]; Oxidation [M168; M179; M258]; Met-loss+Acetyl [N-Term]
FALSE	High	Master Protein	Q08093	Cnn2	Calponin-2 [OS=Mus musculus]	0	308.66	74	22	190	21	305	33.1	7.62	411.52	10.68	5.16	21	1	1	0	High	High	1	0		2	Deamidated [Q248; Q253]	0		Carbamidomethyl [C61; C164; C175; C204; C215; C240; C274; C299]; Oxidation [M64; M79; M159; M170; M181; M201; M210; M221; M245; M249]; Deamidated [Q248; Q253]; Met-loss+Acetyl [N-Term]
FALSE	High	Master Protein	Q08122	Tle3	Isoform 1 of Transducin-like enhancer protein 3 [OS=Mus musculus]	0	33.158	16	10	19	10	771	83.2	7.09	23.78			10			0	High	High	1	0		0		0		Carbamidomethyl [C25; C527; C622]
FALSE	High	Master Protein	Q08288	Lyar	Cell growth-regulating nucleolar protein [OS=Mus musculus]	0	34.843	26	8	15	8	388	43.7	9.5	6.97	4.88		7	2		0	High	High	1	0		4	Deamidated [Q224; Q248; Q251; N260]	0		Deamidated [Q224; Q248; Q251; N260]
FALSE	High	Master Protein	Q08297	Rad51	DNA repair protein RAD51 homolog 1 [OS=Mus musculus]	0	33.515	17	4	7	4	339	36.9	5.6	24.12			4			0	High	High	1	0		0		0		Carbamidomethyl [C31]
FALSE	High	Master Protein	Q08509	Eps8	Epidermal growth factor receptor kinase substrate 8 [OS=Mus musculus]	0	18.777	5	3	5	3	821	91.7	7.65	11	2.05		2	1		0	High	High	1	0		1	Deamidated [N787]	0		Deamidated [N787]
FALSE	High	Master Protein	Q08761	Pros1	Vitamin K-dependent protein S [OS=Mus musculus]	0	22.915	9	6	9	6	675	74.9	5.82	11.67			6			0	High	High	1	0		0		0		Carbamidomethyl [C88; C475]
FALSE	High	Master Protein	Q08879	Fbln1	Fibulin-1 [OS=Mus musculus]	0	22.356	12	6	10	6	705	78	5.16	8.04			6			0	High	High	1	0		0		0		Carbamidomethyl [C399; C405; C481; C487; C496; C553; C558]
FALSE	High	Master Protein	Q08943	Ssrp1	FACT complex subunit SSRP1 [OS=Mus musculus]	0	161.25	38	29	87	29	708	80.8	6.76	153.07	9.2	2.1	27	1	1	0	High	High	1	0		0		1	Phospho [S444]	Carbamidomethyl [C200; C207; C340; C343]; Phospho [S444]; Oxidation [M306]
FALSE	High	Master Protein	Q09143	Slc7a1	High affinity cationic amino acid transporter 1 [OS=Mus musculus]	0	35.856	11	4	11	4	622	67	7.06	34.89			4			0	High	High	1	0		0		0		Carbamidomethyl [C621]
FALSE	High	Master Protein	Q09163	Dlk1	Protein delta homolog 1 [OS=Mus musculus]	0	35.428	16	6	11	6	385	41.3	5.91	17.29			6			0	High	High	1	0		0		0		Carbamidomethyl [C45; C54; C57; C63; C68; C74; C76; C85; C113; C115]
FALSE	High	Master Protein	Q09XV5	Chd8	Chromodomain-helicase-dna-binding protein 8 [OS=Mus musculus]	0	62.535	8	15	25	15	2582	290.7	6.42	35.75			15			0	High	High	1	0		0		0		Carbamidomethyl [C438]
FALSE	High	Master Protein	Q0GNC1	Inf2	Inverted formin-2 [OS=Mus musculus]	0	67.352	10	9	20	9	1273	138.5	5.21	36.82		7.72	8		1	0	High	High	1	0		0		0
FALSE	High	Master Protein	Q0P678	Zc3h18	Zinc finger CCCH domain-containing protein 18 [OS=Mus musculus]	0	21.797	6	3	5	3	948	105.6	7.8	7.57			3			0	High	High	1	0		0		0
FALSE	High	Master Protein	Q0VGB7	Ppp4r2	Serine/threonine-protein phosphatase 4 regulatory subunit 2 [OS=Mus musculus]	0	90.764	43	14	24	14	417	46.5	4.56	37.19	5.95		14	1		0	High	High	1	0		1	Deamidated [Q293]	0		Carbamidomethyl [C22; C30; C105; C134; C136; C295; C377]; Deamidated [Q293]
FALSE	High	Master Protein	Q11011	Npepps	puromycin-sensitive aminopeptidase [OS=Mus musculus]	0	245.657	40	38	147	38	920	103.3	5.9	284.48			38			0	High	High	1	0		0		0		Carbamidomethyl [C191; C528; C538; C888; C889]; Oxidation [M217; M464]
FALSE	High	Master Protein	Q11136	Pepd	xaa-Pro dipeptidase [OS=Mus musculus]	0	33.037	19	9	16	9	493	55	5.78	17.05			9			0	High	High	1	0		0		0		Carbamidomethyl [C183]; Met-loss+Acetyl [N-Term]
FALSE	High	Master Protein	Q11204	St3gal2	CMP-N-acetylneuraminate-beta-galactosamide-alpha-2,3-sialyltransferase 2 [OS=Mus musculus]	0	14.798	11	3	4	3	350	40.1	8.5	2.05			3			0	High	High	1	0		0		0		Carbamidomethyl [C152]
FALSE	High	Master Protein	Q148V8	Fam83h	Protein FAM83H [OS=Mus musculus]	0	9.45	6	4	5	4	1209	131	7.24	0	6		3	1		0	High	High	1	0		0		5	Phospho [S871; S882; S893; S1750; S1761]	Phospho [S871; S882; S893; S1750; S1761]
FALSE	High	Master Protein	Q14AI0	DSCC1	sister chromatid cohesion protein dcc1 [OS=Mus musculus]	0	18.103	13	4	5	4	399	45.5	4.91	11.91			4			0	High	High	1	0		0		0
FALSE	High	Master Protein	Q14C51	Ptcd3	pentatricopeptide repeat domain-containing protein 3, mitochondrial [OS=Mus musculus]	0	41.38	18	11	19	10	685	77.7	5.88	31.11			11			0	High	High	1	0		0		0		Carbamidomethyl [C259; C551]
FALSE	High	Master Protein	Q1HFZ0	Nsun2	tRNA (Cytosine(34)-C(5))-methyltransferase [OS=Mus musculus]	0	275.891	45	35	118	35	757	85.4	6.58	300.95		2.3	34		1	0	High	High	1	0		0		0		Carbamidomethyl [C184; C221; C235; C267; C271; C598; C672; C677; C740; C748]; Oxidation [M183; M277; M561; M623; M701]
FALSE	High	Master Protein	Q2EMV9	Parp14	poly [ADP-ribose] polymerase 14 [OS=Mus musculus]	0	96.016	13	18	21	18	1817	203.7	6.79	46.15			18			0	High	Not Found	1	0		0		0		Carbamidomethyl [C207; C717; C736; C860; C1285; C1324; C1329; C1656; C1740]
FALSE	High	Master Protein	Q2KN98	Specc1l	Cytospin-A [OS=Mus musculus]	0	10.875	3	3	4	3	1118	124.4	5.76	2.19			3			0	High	High	1	0		0		0
FALSE	High	Master Protein	Q2NL51	Gsk3a	Glycogen synthase kinase-3 alpha [OS=Mus musculus]	0	51.127	26	10	22	6	490	51.6	8.81	46.92			10			0	High	High	1	0		0		0		Carbamidomethyl [C241; C262]
FALSE	High	Master Protein	Q2TBE6	Pi4k2a	Phosphatidylinositol 4-kinase type 2-alpha [OS=Mus musculus]	0	24.224	14	5	8	5	479	54.2	8.05	12.03			5			0	High	High	1	0		0		0
FALSE	High	Master Protein	Q2TPA8	Hsdl2	Hydroxysteroid dehydrogenase-like protein 2 [OS=Mus musculus]	0	8.195	7	2	2	2	490	54.2	6.74	4.35			2			0	High	Not Found	1	0		0		0		Carbamidomethyl [C218]
FALSE	High	Master Protein	Q2YDW2	Msto1	Protein misato homolog 1 [OS=Mus musculus]	0	83.474	34	16	32	16	556	61.2	6.49	59.11			16			0	High	High	1	0		0		0		Carbamidomethyl [C46; C397; C458]
FALSE	High	Master Protein	Q31125	Slc39a7	Zinc transporter SLC39A7 [OS=Mus musculus]	0	54.368	7	4	18	4	476	50.6	6.87	37.33			4			0	High	High	1	0		0		0
FALSE	High	Master Protein	Q3B7Z2	Osbp	Oxysterol-binding protein 1 [OS=Mus musculus]	0	90.305	24	15	29	15	805	88.7	7.2	45.79			15			0	High	High	1	0		0		0		Carbamidomethyl [C222; C274; C515; C792]
FALSE	High	Master Protein	Q3KNM2	Marchf5	E3 ubiquitin-protein ligase MARCH5 [OS=Mus musculus]	0	24.583	18	4	7	4	278	31.2	8.7	19.99			4			0	High	High	1	0		0		0		Carbamidomethyl [C46; C65; C68]
FALSE	High	Master Protein	Q3T9E4	Tgtp2	T-cell-specific guanine nucleotide triphosphate-binding protein 2 [OS=Mus musculus]	0	76.171	27	12	18	12	415	47.1	5.74	46.79			12			0	High	Not Found	1	0		0		0		Oxidation [M96]
FALSE	High	Master Protein	Q3TAS6	Emc10	ER membrane protein complex subunit 10 [OS=Mus musculus]	0	10.69	8	3	10	3	258	27	5.91	7.06			3			0	High	High	1	0		0		0
FALSE	High	Master Protein	Q3TB82	Plekhf1	Pleckstrin homology domain-containing family F member 1 [OS=Mus musculus]	0	48.138	32	7	19	7	279	31.1	8.1	47.24			7			0	High	High	1	0		0		0		Met-loss+Acetyl [N-Term]; Carbamidomethyl [C129; C158; C204; C207]
FALSE	High	Master Protein	Q3TBT3	Sting1	Stimulator of interferon genes protein [OS=Mus musculus]	0	25.875	23	6	7	6	378	42.8	7.42	12.67		3.26	5		1	0	High	High	1	0		0		0		Met-loss [N-Term]; Carbamidomethyl [C64; C65; C71]
FALSE	High	Master Protein	Q3TC93	Hs1bp3	HCLS1-binding protein 3 [OS=Mus musculus]	0	15.318	9	3	7	3	395	43.7	4.98	7.39			3			0	High	High	1	0		0		0
FALSE	High	Master Protein	Q3TCH7	Cul4a	cullin-4A [OS=Mus musculus]	0	60.234	19	17	43	7	759	87.7	8.35	51.65			17			0	High	High	1	0		0		0		Carbamidomethyl [C138; C143; C633]
FALSE	High	Master Protein	Q3TCJ1	Abraxas2	BRISC complex subunit Abraxas 2 [OS=Mus musculus]	0	30.321	17	7	14	7	415	46.9	6.18	22.68			7			0	High	High	1	0		0		0		Carbamidomethyl [C224]
FALSE	High	Master Protein	Q3TCN2	Plbd2	Putative phospholipase B-like 2 [OS=Mus musculus]	0	4.366	3	2	3	2	594	66.2	6.13	2.01			2			0	High	Not Found	1	0		0		0
FALSE	High	Master Protein	Q3TDN2	Faf2	FAS-associated factor 2 [OS=Mus musculus]	0	110.552	46	14	40	14	445	52.4	5.47	102.53			14			0	High	High	1	0		0		0		Carbamidomethyl [C32; C189; C194; C211; C349]; Met-loss+Acetyl [N-Term]
FALSE	High	Master Protein	Q3TDQ1	Stt3b	Dolichyl-diphosphooligosaccharide--protein glycosyltransferase subunit STT3B [OS=Mus musculus]	0	111.91	22	17	60	15	823	93.2	8.95	102.91	3.87		17	1		0	High	High	1	0		1	Deamidated [N121]	0		Carbamidomethyl [C712]; Oxidation [M24; M675; M725]; Met-loss+Acetyl [N-Term]; Deamidated [N121]
FALSE	High	Master Protein	Q3TEA8	Hp1bp3	Heterochromatin protein 1-binding protein 3 [OS=Mus musculus]	0	13.365	10	5	8	5	554	60.8	9.7	6.3			5			0	High	High	1	0		0		0
FALSE	High	Master Protein	Q3TFD2	Lpcat1	Lysophosphatidylcholine acyltransferase 1 [OS=Mus musculus]	0	14.553	10	4	6	4	534	59.7	6.34	8.55			4			0	High	High	1	0		0		0		Carbamidomethyl [C216; C330]
FALSE	High	Master Protein	Q3TFK5	Gpatch4	G patch domain-containing protein 4 [OS=Mus musculus]	0	7.028	6	2	2	2	415	46.5	9.39	2.05			2			0	High	High	1	0		0		0
FALSE	High	Master Protein	Q3TFQ1	Spryd7	SPRY domain-containing protein 7 [OS=Mus musculus]	0	5.186	8	2	6	2	196	21.7	6.7	5.07			2			0	High	High	1	0		0		0
FALSE	High	Master Protein	Q3THE2	Myl12b	Myosin regulatory light chain 12B [OS=Mus musculus]	0	90.793	41	9	53	4	172	19.8	4.84	115.79	4.98	6.15	8	1	1	0	High	High	1	0		1	Deamidated [N95]	0		Oxidation [M25; M40; M130]; Deamidated [N95]
FALSE	High	Master Protein	Q3THG9	Aarsd1	Alanyl-tRNA editing protein Aarsd1 [OS=Mus musculus]	0	53.352	32	11	20	11	412	44.9	6.42	51.46			11			0	High	High	1	0		0		0		Carbamidomethyl [C5; C21]; Met-loss+Acetyl [N-Term]
FALSE	High	Master Protein	Q3THJ3	Eif1ad	probable RNA-binding protein EIF1AD [OS=Mus musculus]	0	18.187	18	2	4	2	170	19.5	4.87	13.8			2			0	High	High	1	0		0		0
FALSE	High	Master Protein	Q3THK3	Gtf2f1	General transcription factor iif subunit 1 [OS=Mus musculus]	0	105.716	31	14	31	14	508	57.2	7.01	95.66			14			0	High	High	1	0		0		0		Met-loss+Acetyl [N-Term]; Oxidation [M177]
FALSE	High	Master Protein	Q3THK7	Gmps	GMP synthase [glutamine-hydrolyzing] [OS=Mus musculus]	0	323.593	53	35	178	35	693	76.7	6.73	335.24	3.88		35	1		0	High	High	1	0		1	Deamidated [N305]	0		Oxidation [M275; M329; M499; M611; M679]; Carbamidomethyl [C4; C137; C213; C449; C456; C523; C530]; Met-loss+Acetyl [N-Term]; Deamidated [N305]
FALSE	High	Master Protein	Q3THS6	Mat2a	S-adenosylmethionine synthase isoform type-2 [OS=Mus musculus]	0	133.215	48	21	72	21	395	43.7	6.48	137.95			21			0	High	High	1	0		0		0		Carbamidomethyl [C34; C104]
FALSE	High	Master Protein	Q3THW5	H2az2	Histone H2A.V [OS=Mus musculus]	0	10.977	20	3	10	3	128	13.5	10.58	8.93			3			0	High	High	1	0		0		0
FALSE	High	Master Protein	Q3TIR1	Trappc13	Trafficking protein particle complex subunit 13 [OS=Mus musculus]	0	13.612	8	4	9	4	417	46.4	5.49	10.52			4			0	High	High	1	0		0		0
FALSE	High	Master Protein	Q3TIR3	Ric8a	Synembryn-A [OS=Mus musculus]	0	21.025	11	5	10	4	530	59.8	5.68	16.97			5			0	High	High	1	0		0		0		Carbamidomethyl [C79; C329; C340]
FALSE	High	Master Protein	Q3TIU4	Pde12	2',5'-phosphodiesterase 12 [OS=Mus musculus]	0	51.77	19	9	24	9	608	67.5	6.92	44.23			9			0	High	High	1	0		0		0		Carbamidomethyl [C179; C237; C267; C276; C529; C536]
FALSE	High	Master Protein	Q3TIV5	Zc3h15	Zinc finger CCCH domain-containing protein 15 [OS=Mus musculus]	0	123.365	42	16	67	16	426	48.3	5.3	133.94			16			0	High	High	1	0		0		0		Carbamidomethyl [C105]
FALSE	High	Master Protein	Q3TIX9	Usp39	U4/U6.U5 tri-snRNP-associated protein 2 [OS=Mus musculus]	0.003	3.012	2	2	2	2	564	65.1	8.9	2.03			2			0	High	Not Found	1	0		0		0
FALSE	High	Master Protein	Q3TJD7	Pdlim7	PDZ and LIM domain protein 7 [OS=Mus musculus]	0	162.026	61	22	92	22	457	50.1	8.47	213.62			22			0	High	High	1	0		0		0		Carbamidomethyl [C308; C311; C329; C332; C364; C367; C370; C388]; Oxidation [M149]
FALSE	High	Master Protein	Q3TJZ6	Fam98a	protein FAM98A [OS=Mus musculus]	0	50.39	15	6	13	5	515	55	8.95	40.68			6			0	High	High	1	0		0		0
FALSE	High	Master Protein	Q3TKY6	Cwc27	Peptidyl-prolyl cis-trans isomerase CWC27 homolog [OS=Mus musculus]	0	33.421	19	6	11	6	469	53.5	5.53	26.86			6			0	High	High	1	0		0		0		Met-loss [N-Term]; Carbamidomethyl [C164]
FALSE	High	Master Protein	Q3TLD5	Uri1	Unconventional prefoldin RPB5 interactor [OS=Mus musculus]	0	30.935	11	4	5	4	531	59	5.07	18.28			4			0	High	High	1	0		0		0
FALSE	High	Master Protein	Q3TLH4	Prrc2c	Protein Prrc2c [OS=Mus musculus]	0	191.023	17	36	79	35	2846	310.7	9.1	163.32			36			0	High	High	1	0		0		0		Carbamidomethyl [C224; C870; C2292]; Oxidation [M782]
FALSE	High	Master Protein	Q3TMW1	Ccdc102a	Coiled-coil domain-containing protein 102A [OS=Mus musculus]	0	35.948	14	5	8	5	549	62.6	5.69	25.16			5			0	High	High	1	0		0		0		Carbamidomethyl [C213; C217; C401]
FALSE	High	Master Protein	Q3TN34	Micall2	MICAL-like protein 2 [OS=Mus musculus]	0	180.612	47	32	79	31	1009	108.2	9.55	141.65		5.25	31		1	0	High	High	1	0		0		0		Carbamidomethyl [C11; C37; C188; C191; C238]
FALSE	High	Master Protein	Q3TNA1	Xylb	xylulose kinase [OS=Mus musculus]	0	8.329	5	2	2	2	551	59.5	6.9	2.37			2			0	Not Found	High	1	0		0		0
FALSE	High	Master Protein	Q3TPE9	Ankmy2	Ankyrin repeat and MYND domain-containing protein 2 [OS=Mus musculus]	0	10.067	5	2	6	2	440	48.7	6.67	9.59			2			0	High	High	1	0		0		0		Carbamidomethyl [C341; C345]
FALSE	High	Master Protein	Q3TPX4	Exoc5	Exocyst complex component 5 [OS=Mus musculus]	0	5.054	3	2	2	2	708	81.7	6.71	0			2			0	High	Not Found	1	0		0		0
FALSE	High	Master Protein	Q3TSG4	Alkbh5	RNA demethylase ALKBH5 [OS=Mus musculus]	0	7.174	7	3	4	3	395	44.4	9.09	2.37			3			0	High	High	1	0		0		0
FALSE	High	Master Protein	Q3TT38	Ilrun	Uncharacterized protein C6orf106 homolog [OS=Mus musculus]	0	9.359	9	2	5	2	291	32.1	4.48	10.72			2			0	High	High	1	0		0		0
FALSE	High	Master Protein	Q3TUH1	Tamm41	Phosphatidate cytidylyltransferase, mitochondrial [OS=Mus musculus]	0	22.386	23	7	13	7	337	37.8	8.98	23.19	5.6		6	1		0	High	High	1	0		1	Deamidated [Q278]	0		Met-loss+Acetyl [N-Term]; Carbamidomethyl [C285]; Deamidated [Q278]
FALSE	High	Master Protein	Q3TUU5	Tex30	Testis-expressed protein 30 [OS=Mus musculus]	0	23.167	26	5	8	5	225	25.2	8.75	17.21			5			0	High	High	1	0		0		0		Carbamidomethyl [C21; C113; C129]
FALSE	High	Master Protein	Q3TVI8	Pbxip1	Pre-B-cell leukemia transcription factor-interacting protein 1 [OS=Mus musculus]	0	27.137	10	6	8	6	727	81.1	5.36	15.7			6			0	High	High	1	0		0		0		Carbamidomethyl [C345; C584; C590]
FALSE	High	Master Protein	Q3TW96	Uap1l1	UDP-N-acetylhexosamine pyrophosphorylase-like protein 1 [OS=Mus musculus]	0	69.94	37	17	37	15	507	56.6	5.43	73.41			17			0	High	High	1	0		0		0		Carbamidomethyl [C254]
FALSE	High	Master Protein	Q3TWF6	Wdr70	WD repeat-containing protein 70 [OS=Mus musculus]	0	79.505	26	15	32	15	657	73.1	5.97	67.2			15			0	High	High	1	0		0		0		Oxidation [M80]
FALSE	High	Master Protein	Q3TWL2	Pip4p1	Type 1 phosphatidylinositol 4,5-bisphosphate 4-phosphatase [OS=Mus musculus]	0	14.722	11	2	4	1	284	30	8.82	12.67			2			0	High	High	1	0		0		0		Carbamidomethyl [C132; C134; C136; C140]
FALSE	High	Master Protein	Q3TWW8	Srsf6	Serine/arginine-rich splicing factor 6 [OS=Mus musculus]	0	44.647	24	10	41	7	339	39	11.46	60.35	4.92		10	1		0	High	High	1	0		1	Deamidated [N172]	0		Deamidated [N172]; Carbamidomethyl [C121]
FALSE	High	Master Protein	Q3TX08	Trmt1	tRNA (guanine(26)-N(2))-dimethyltransferase [OS=Mus musculus]	0	57.574	21	11	18	11	663	72.3	8	36.49			11			0	High	High	1	0		0		0		Carbamidomethyl [C87; C149; C375; C383; C386]
FALSE	High	Master Protein	Q3TXS7	Psmd1	26S proteasome non-ATPase regulatory subunit 1 [OS=Mus musculus]	0	235.394	44	35	96	35	953	105.7	5.39	231.46			35			0	High	High	1	0		0		0		Carbamidomethyl [C112; C571; C591; C633; C659; C660; C806; C898]; Oxidation [M894]
FALSE	High	Master Protein	Q3TXU5	Dhps	deoxyhypusine synthase [OS=Mus musculus]	0	25.853	19	6	15	6	369	40.6	5.67	27.27			6			0	High	High	1	0		0		0
FALSE	High	Master Protein	Q3TYS2	Cybc1	Uncharacterized protein C17orf62 homolog [OS=Mus musculus]	0	32.656	34	7	14	7	187	20.9	8.59	27.14			7			0	High	High	1	0		0		0
FALSE	High	Master Protein	Q3TYX3	Smyd5	SET and MYND domain-containing protein 5 [OS=Mus musculus]	0	55.007	30	10	33	10	416	47.1	5.21	50.14			10			0	High	High	1	0		0		0		Carbamidomethyl [C101; C111; C114; C119; C123; C136; C375; C377]
FALSE	High	Master Protein	Q3TZM9	Alg11	GDP-Man:Man(3)GlcNAc(2)-PP-Dol alpha-1,2-mannosyltransferase [OS=Mus musculus]	0	18.796	10	5	8	5	492	55.2	8.29	15.72			5			0	High	High	1	0		0		0		Carbamidomethyl [C84]
FALSE	High	Master Protein	Q3TZZ7	Esyt2	Extended synaptotagmin-2 [OS=Mus musculus]	0	60.762	19	14	25	13	845	94.1	7.75	47.02			14			0	High	High	1	0		0		0		Carbamidomethyl [C105]; Met-loss+Acetyl [N-Term]
FALSE	High	Master Protein	Q3U0K8	Ogfod1	prolyl 3-hydroxylase OGFOD1 [OS=Mus musculus]	0	23.082	11	5	7	5	545	62.7	4.91	7.74			5			0	High	High	1	0		0		0		Carbamidomethyl [C45; C143; C344]
FALSE	High	Master Protein	Q3U0V1	Khsrp	Far upstream element-binding protein 2 [OS=Mus musculus]	0	398.95	61	38	165	35	748	76.7	7.33	458.12	23.95		38	4		0	High	High	1	0		7	Deamidated [N227; N229; Q232; N233; Q237; Q276; Q636]	0		Carbamidomethyl [C177; C297]; Deamidated [N227; N229; Q232; N233; Q237; Q276; Q636]; Oxidation [M146; M207; M208; M268; P665]; Met-loss+Acetyl [N-Term]
FALSE	High	Master Protein	Q3U0V2	Tradd	Tumor necrosis factor receptor type 1-associated DEATH domain protein [OS=Mus musculus]	0	34.014	21	5	13	5	310	34.6	5.2	35.27			5			0	High	High	1	0		0		0		Carbamidomethyl [C102; C135]
FALSE	High	Master Protein	Q3U186	Rars2	probable arginine--tRNA ligase, mitochondrial [OS=Mus musculus]	0	12.57	8	5	7	5	578	65.3	8.02	7.33			5			0	High	High	1	0		0		0		Carbamidomethyl [C11; C576]
FALSE	High	Master Protein	Q3U1J4	Ddb1	DNA damage-binding protein 1 [OS=Mus musculus]	0	340.936	44	45	171	45	1140	126.8	5.26	380.43	3.46		45	1		0	High	High	1	0		1	Deamidated [Q1113]	0		Carbamidomethyl [C87; C128; C173; C179; C378; C652; C725; C732; C903]; Deamidated [Q1113]; Oxidation [M276; M938]
FALSE	High	Master Protein	Q3U1V6	Uevld	Ubiquitin-conjugating enzyme E2 variant 3 [OS=Mus musculus]	0	33.581	20	9	15	9	471	51.6	7.28	17.26			9			0	High	High	1	1	Acetyl [N-Term]	0		0		Acetyl [N-Term]; Carbamidomethyl [C5; C319]
FALSE	High	Master Protein	Q3U2A8	Vars2	Valine--tRNA ligase, mitochondrial [OS=Mus musculus]	0	11.344	5	4	7	4	1060	118.4	7.14	6.87			4			0	High	High	1	0		0		0
FALSE	High	Master Protein	Q3U2P1	Sec24a	Protein transport protein Sec24A [OS=Mus musculus]	0	72.811	17	18	47	18	1090	118.7	7.83	46.27			18			0	High	High	1	0		0		0		Carbamidomethyl [C378; C385; C449; C452; C925]
FALSE	High	Master Protein	Q3U308	Ctu2	Cytoplasmic tRNA 2-thiolation protein 2 [OS=Mus musculus]	0	27.159	11	5	6	5	514	56.1	7.08	14.76			5			0	High	High	1	0		0		0
FALSE	High	Master Protein	Q3U319	Rnf40	E3 ubiquitin-protein ligase BRE1B [OS=Mus musculus]	0.001	4.231	2	2	2	1	1001	113.9	6.48	0			2			0	High	Not Found	1	0		0		0
FALSE	High	Master Protein	Q3U3W5	Prmt9	protein arginine N-methyltransferase 9 [OS=Mus musculus]	0	12.535	4	3	5	3	846	94.2	5.36	9.22			3			0	High	High	1	0		0		0
FALSE	High	Master Protein	Q3U487	Hectd3	E3 ubiquitin-protein ligase HECTD3 [OS=Mus musculus]	0	9.297	4	3	4	3	861	97.3	5.47	5.76			3			0	High	High	1	0		0		0		Carbamidomethyl [C459]
FALSE	High	Master Protein	Q3U4G3	Xxylt1	Xyloside xylosyltransferase 1 [OS=Mus musculus]	0	4.938	6	3	4	3	392	43.8	7.78	1.81			3			0	High	High	1	0		0		0		Carbamidomethyl [C356]
FALSE	High	Master Protein	Q3U5F4	Yrdc	YrdC domain-containing protein, mitochondrial [OS=Mus musculus]	0	11.677	14	3	5	3	280	29.4	6.07	6.84			3			0	High	High	1	0		0		0		Carbamidomethyl [C122]
FALSE	High	Master Protein	Q3U5Q7	Cmpk2	UMP-CMP kinase 2, mitochondrial [OS=Mus musculus]	0	27.864	17	6	9	6	447	50	7.27	11.48			6			0	High	Not Found	1	0		0		0		Carbamidomethyl [C76; C85; C226; C422]
FALSE	High	Master Protein	Q3U7R1	Esyt1	Extended synaptotagmin-1 [OS=Mus musculus]	0	142.125	34	30	63	29	1092	121.5	5.95	124.52	3.2		29	1		0	High	High	1	1	Acetyl [N-Term]	1	Deamidated [Q494]	0		Deamidated [Q494]; Carbamidomethyl [C360; C983]; Acetyl [N-Term]
FALSE	High	Master Protein	Q3U962	Col5a2	Collagen alpha-2(V) chain [OS=Mus musculus]	0	94.625	15	16	41	16	1497	144.9	6.7	65.73	15.08		13	3		0	High	High	1	0		0		0		Oxidation [M209; P237; P240; P243; P909; P1196; P1197; M1410]; Carbamidomethyl [C1326; C1334; C1448]
FALSE	High	Master Protein	Q3U9G9	Lbr	Lamin-B receptor [OS=Mus musculus]	0	54.391	24	13	25	13	626	71.4	9.36	43.7	3.07		13	1		0	High	High	1	0		1	Deamidated [N374]	0		Deamidated [N374]
FALSE	High	Master Protein	Q3UA06	Trip13	Pachytene checkpoint protein 2 homolog [OS=Mus musculus]	0	108.048	42	17	53	17	432	48.3	5.86	114.54			17			0	High	High	1	1	Acetyl [N-Term]	0		0		Carbamidomethyl [C14; C334; C341]; Acetyl [N-Term]
FALSE	High	Master Protein	Q3UA37	Qrich1	Glutamine-rich protein 1 [OS=Mus musculus]	0	28.185	6	8	20	8	777	86.5	5.96	17.52			8			0	High	High	1	0		0		0
FALSE	High	Master Protein	Q3UBX0	Tmem109	Transmembrane protein 109 [OS=Mus musculus]	0	8.401	9	2	4	2	243	26.3	9.89	9.73			2			0	High	High	1	0		0		0
FALSE	High	Master Protein	Q3UCV8	Otulin	Ubiquitin thioesterase otulin [OS=Mus musculus]	0	12.378	13	4	6	4	352	40.3	5.68	4.44			4			0	High	High	1	0		0		0		Carbamidomethyl [C47; C92]
FALSE	High	Master Protein	Q3UDE2	Ttll12	Tubulin--tyrosine ligase-like protein 12 [OS=Mus musculus]	0	224.259	57	31	89	31	639	74	5.63	209.76	5.91	0	29	1	1	0	High	High	1	1	Acetyl [N-Term]	0		1	Phospho [S11]	Carbamidomethyl [C93; C121; C304; C356; C365; C413; C558; C567; C607]; Acetyl [N-Term]; Phospho [S11]
FALSE	High	Master Protein	Q3UDK1	Trafd1	TRAF-type zinc finger domain-containing protein 1 [OS=Mus musculus]	0.004	2.912	3	2	2	2	580	64.2	5.48	0			2			0	High	High	1	0		0		0		Oxidation [M179]
FALSE	High	Master Protein	Q3UDR8	Yipf3	protein YIPF3 [OS=Mus musculus]	0	33.147	19	6	9	6	347	38	5.94	21.53			6			0	High	High	1	0		0		0		Met-loss+Acetyl [N-Term]
FALSE	High	Master Protein	Q3UDW8	Hgsnat	heparan-alpha-glucosaminide N-acetyltransferase [OS=Mus musculus]	0	25.244	7	5	10	5	656	72.5	8.27	21.17			5			0	High	High	1	0		0		0		Carbamidomethyl [C455]
FALSE	High	Master Protein	Q3UE17	Mex3d	RNA-binding protein MEX3D [OS=Mus musculus]	0	8.882	4	2	6	2	643	65.3	5.63	3.08			2			0	High	High	1	0		0		0
FALSE	High	Master Protein	Q3UE37	Ube2z	Ubiquitin-conjugating enzyme E2 Z [OS=Mus musculus]	0	105.291	37	17	69	17	356	38.3	5.62	129.75			17			0	High	High	1	0		0		0		Carbamidomethyl [C102; C156; C245; C256; C263; C265; C288]; Oxidation [M111; M258; M259; M317]
FALSE	High	Master Protein	Q3UEB3	Puf60	Isoform 2 of Poly(U)-binding-splicing factor PUF60 [OS=Mus musculus]	0	113.265	34	16	51	16	547	58.5	5.35	108.66			16			0	High	High	1	0		0		0		Carbamidomethyl [C117; C475]; Oxidation [M155]
FALSE	High	Master Protein	Q3UFB2	Znhit6	Box C/D snoRNA protein 1 [OS=Mus musculus]	0	5.497	5	3	7	3	460	52.2	5.57	5.31			3			0	High	High	1	0		0		0
FALSE	High	Master Protein	Q3UFK8	Frmd8	FERM domain-containing protein 8 [OS=Mus musculus]	0	10.669	7	3	5	3	466	51.8	6.44	6.29			3			0	High	High	1	0		0		0
FALSE	High	Master Protein	Q3UFY7	Nt5c3b	7-methylguanosine phosphate-specific 5'-nucleotidase [OS=Mus musculus]	0	63.18	34	8	24	8	300	34.4	6.24	43.02	3.51		8	1		0	High	High	1	0		1	Deamidated [N212]	0		Carbamidomethyl [C56; C210]; Met-loss+Acetyl [N-Term]; Deamidated [N212]
FALSE	High	Master Protein	Q3UFY8	Trmt10c	Mitochondrial ribonuclease P protein 1 [OS=Mus musculus]	0	15.933	9	4	6	4	414	48.4	9.38	10.78			4			0	High	High	1	0		0		0		Carbamidomethyl [C241]
FALSE	High	Master Protein	Q3UGC7	Eif3j1	eukaryotic translation initiation factor 3 subunit J-A [OS=Mus musculus]	0	79.896	47	12	29	12	261	29.3	4.81	61.63	7.36		11	2		0	High	High	1	0		2	Deamidated [Q116; N142]	0		Deamidated [Q116; N142]; Carbamidomethyl [C210]; Met-loss+Acetyl [N-Term]
FALSE	High	Master Protein	Q3UGP8	Alg10b	Putative Dol-P-Glc:Glc(2)Man(9)GlcNAc(2)-PP-Dol alpha-1,2-glucosyltransferase [OS=Mus musculus]	0	13.952	6	3	4	3	474	55.4	9.54	7.89			3			0	Not Found	High	1	0		0		0
FALSE	High	Master Protein	Q3UGP9	Lrrc58	Leucine-rich repeat-containing protein 58 [OS=Mus musculus]	0	36.187	27	9	23	9	366	40.1	6.62	29.1			9			0	High	High	1	0		0		0		Carbamidomethyl [C114; C165; C291; C296; C303; C304; C314]
FALSE	High	Master Protein	Q3UH60	Dip2b	Disco-interacting protein 2 homolog B [OS=Mus musculus]	0	22.258	4	7	10	6	1574	171	8.09	18.33			7			0	High	High	1	0		0		0		Carbamidomethyl [C590; C1280]
FALSE	High	Master Protein	Q3UHB1	Nt5dc3	5'-nucleotidase domain-containing protein 3 [OS=Mus musculus]	0	7.986	5	3	4	3	546	63.1	8.56	6.33			3			0	High	High	1	0		0		0		Carbamidomethyl [C274]
FALSE	High	Master Protein	Q3UHC2	Lrrk1	Leucine-rich repeat serine/threonine-protein kinase 1 [OS=Mus musculus]	0	4.464	1	2	2	2	2014	225.3	6.68	0			2			0	High	High	1	0		0		0
FALSE	High	Master Protein	Q3UHD6	Snx27	Sorting nexin-27 [OS=Mus musculus]	0	122.104	49	21	57	21	539	61	6.4	118.03	11.17		20	2		0	High	High	1	0		2	Deamidated [N31; N103]	0		Carbamidomethyl [C28; C352; C419; C430; C432; C511; C517]; Deamidated [N31; N103]; Met-loss+Acetyl [N-Term]
FALSE	High	Master Protein	Q3UHH1	Zswim8	Zinc finger SWIM domain-containing protein 8 [OS=Mus musculus]	0	20.751	4	7	14	7	1832	196.9	6.84	15.16			7			0	High	High	1	0		0		0		Carbamidomethyl [C507]
FALSE	High	Master Protein	Q3UHH8	Gxylt1	Glucoside xylosyltransferase 1 [OS=Mus musculus]	0	17.323	15	5	6	5	404	46.5	8.97	8.66			5			0	High	High	1	0		0		0
FALSE	High	Master Protein	Q3UHJ0	Aak1	AP2-associated protein kinase 1 [OS=Mus musculus]	0	115.93	27	17	43	17	959	103.3	6.7	77.03	4.37		17	1		0	High	High	1	0		1	Deamidated [Q206]	0		Deamidated [Q206]; Carbamidomethyl [C87; C193; C288]
FALSE	High	Master Protein	Q3UHK8	Tnrc6a	Trinucleotide repeat-containing gene 6A protein [OS=Mus musculus]	0	4.274	1	2	2	2	1896	203.1	6.93	0			2			0	High	Not Found	1	0		0		0
FALSE	High	Master Protein	Q3UHX2	Pdap1	28 kDa heat- and acid-stable phosphoprotein [OS=Mus musculus]	0	104.706	43	14	44	14	181	20.6	7.39	106.52			14			0	High	High	1	0		0		0		Oxidation [M174]
FALSE	High	Master Protein	Q3UI43	Babam1	BRISC and BRCA1-A complex member 1 [OS=Mus musculus]	0	21.892	28	4	9	4	333	36.8	4.55	5.33	12.8		2	2		0	High	High	1	1	Acetyl [N-Term]	2	Deamidated [N7; Q78]	0		Acetyl [N-Term]; Deamidated [N7; Q78]; Carbamidomethyl [C298]
FALSE	High	Master Protein	Q3UIA2	Arhgap17	Rho GTPase-activating protein 17 [OS=Mus musculus]	0	6.88	4	3	4	3	846	92.1	7.56	1.74			3			0	High	High	1	0		0		0
FALSE	High	Master Protein	Q3UIR3	Dtx3l	E3 ubiquitin-protein ligase DTX3L [OS=Mus musculus]	0	109.431	26	15	21	15	748	83	8.09	49.64			15			0	High	Not Found	1	0		0		0		Carbamidomethyl [C569; C572; C585; C590; C593; C604; C607]
FALSE	High	Master Protein	Q3UJB9	Edc4	Enhancer of mRNA-decapping protein 4 [OS=Mus musculus]	0	137.921	23	22	49	22	1406	152.4	5.78	101.77	6.59		21	1		0	High	High	1	0		1	Deamidated [N852]	0		Carbamidomethyl [C4; C238; C248; C249; C299; C843; C981; C1135]; Deamidated [N852]; Met-loss+Acetyl [N-Term]
FALSE	High	Master Protein	Q3UJD6	Usp19	Isoform 2 of Ubiquitin carboxyl-terminal hydrolase 19 [OS=Mus musculus]	0	49.622	12	11	19	11	1323	146.2	6.43	30.22			11			0	High	High	1	0		0		0		Carbamidomethyl [C859; C863; C1084]
FALSE	High	Master Protein	Q3UKJ7	Smu1	WD40 repeat-containing protein SMU1 [OS=Mus musculus]	0	37.873	24	10	24	10	513	57.5	7.18	30.25			10			0	High	High	1	0		0		0		Carbamidomethyl [C312; C416]
FALSE	High	Master Protein	Q3ULD5	Mccc2	Methylcrotonoyl-CoA carboxylase beta chain, mitochondrial [OS=Mus musculus]	0	75.291	33	15	30	15	563	61.3	8	65.59			15			0	High	High	1	0		0		0		Carbamidomethyl [C267; C391; C392]
FALSE	High	Master Protein	Q3ULJ0	Gpd1l	Glycerol-3-phosphate dehydrogenase 1-like protein [OS=Mus musculus]	0	16.851	15	5	7	5	351	38.2	6.77	5.78			5			0	High	High	1	0		0		0		Carbamidomethyl [C104]
FALSE	High	Master Protein	Q3UM18	Lsg1	Large subunit GTPase 1 homolog [OS=Mus musculus]	0	70.118	30	17	27	17	644	73.1	6.51	36.74			17			0	High	High	1	0		0		0		Carbamidomethyl [C112; C191; C196; C461]
FALSE	High	Master Protein	Q3UM45	Ppp1r7	Protein phosphatase 1 regulatory subunit 7 [OS=Mus musculus]	0	65.526	35	14	25	14	361	41.3	4.92	46.22			14			0	High	High	1	0		0		0		Carbamidomethyl [C113]
FALSE	High	Master Protein	Q3UMB9	Washc4	WASH complex subunit 4 [OS=Mus musculus]	0	21.609	5	6	9	6	1173	136.3	7.37	13.36			6			0	High	High	1	0		0		0		Carbamidomethyl [C640]
FALSE	High	Master Protein	Q3UMC0	Spata5	Spermatogenesis-associated protein 5 [OS=Mus musculus]	0	41.974	14	10	19	9	893	97.2	8.24	25.28			10			0	High	High	1	0		0		0		Carbamidomethyl [C568]
FALSE	High	Master Protein	Q3UMF0	Cobll1	Isoform 2 of Cordon-bleu protein-like 1 [OS=Mus musculus]	0	181.767	35	28	72	28	1241	133.3	7.36	162.7	2.33		28	1		0	High	High	1	0		1	Deamidated [Q844]	0		Carbamidomethyl [C189; C192; C618]; Oxidation [M651]; Deamidated [Q844]
FALSE	High	Master Protein	Q3UMG5	Lrch2	Leucine-rich repeat and calponin homology domain-containing protein 2 [OS=Mus musculus]	0	11.794	5	4	7	3	773	84.9	6.58	1.84			4			0	High	High	1	0		0		0		Carbamidomethyl [C264]
FALSE	High	Master Protein	Q3UMQ8	Naf1	H/ACA ribonucleoprotein complex non-core subunit NAF1 [OS=Mus musculus]	0	16.476	8	3	5	3	489	53.2	5.16	8			3			0	High	High	1	0		0		0
FALSE	High	Master Protein	Q3UMR5	Mcu	Calcium uniporter protein, mitochondrial [OS=Mus musculus]	0	35.468	27	8	12	8	350	39.7	8.56	29.01			8			0	High	High	1	0		0		0		Carbamidomethyl [C190]
FALSE	High	Master Protein	Q3UMU9	Hdgfl2	Hepatoma-derived growth factor-related protein 2 [OS=Mus musculus]	0	61.831	19	11	43	9	669	74.2	8.66	84.54	5.86	2.68	10	1	1	0	High	High	1	0		2	Deamidated [N598; Q604]	0		Oxidation [M15]; Met-loss [N-Term]; Deamidated [N598; Q604]
FALSE	High	Master Protein	Q3UMW7	Mapkapk3	MAP kinase-activated protein kinase 3 [OS=Mus musculus]	0	24.361	11	4	10	2	384	43.3	8.09	15.47			4			0	High	High	1	0		0		0
FALSE	High	Master Protein	Q3UMY5	Eml4	Echinoderm microtubule-associated protein-like 4 [OS=Mus musculus]	0	62.924	16	16	33	15	988	110	6.54	39.84			16			0	High	High	1	0		0		0		Carbamidomethyl [C379; C527; C621; C628; C822]
FALSE	High	Master Protein	Q3UN02	Lclat1	Lysocardiolipin acyltransferase 1 [OS=Mus musculus]	0	30.681	20	7	22	7	376	44.4	8.53	35.3			7			0	High	High	1	0		0		0		Carbamidomethyl [C266]
FALSE	High	Master Protein	Q3UNA4	Nxt2	NTF2-related export protein 2 [OS=Mus musculus]	0.001	4.197	11	2	8	2	142	16.2	5.81	0			2			0	High	High	1	0		0		0		Carbamidomethyl [C15; C133]
FALSE	High	Master Protein	Q3UPF5	Zc3hav1	zinc finger CCCH-type antiviral protein 1 [OS=Mus musculus]	0	143.866	31	26	61	26	946	106.6	8.27	130.7	3.67		25	1		0	High	High	1	0		0		1	Phospho [S553]	Carbamidomethyl [C78; C82; C88; C162; C168; C182; C187; C219; C604; C671; C889]; Phospho [S553]
FALSE	High	Master Protein	Q3UPH1	Prrc1	protein PRRC1 [OS=Mus musculus]	0	31.607	18	7	12	7	443	46.3	5.95	23.3		2.73	6		1	0	High	High	1	0		0		0
FALSE	High	Master Protein	Q3UPH7	Arhgef40	Rho guanine nucleotide exchange factor 40 [OS=Mus musculus]	0	18.191	4	6	7	6	1517	165	5.55	7.66			6			0	High	High	1	0		0		0		Carbamidomethyl [C165; C1156]
FALSE	High	Master Protein	Q3UPL0	Sec31a	Protein transport protein Sec31A [OS=Mus musculus]	0	365.182	38	46	174	46	1230	133.5	6.76	358.99	2.79	5.88	44	1	2	0	High	High	1	0		1	Deamidated [Q789]	0		Carbamidomethyl [C60; C173; C457; C643; C668; C688; C690; C693; C1140]; Deamidated [Q789]; Oxidation [M633]
FALSE	High	Master Protein	Q3UQ28	Pxdn	peroxidasin homolog [OS=Mus musculus]	0	113.618	17	20	33	20	1475	165	7.14	65.46			20			0	High	High	1	0		0		0		Carbamidomethyl [C451; C499; C872; C1298; C1312; C1313; C1316; C1411]
FALSE	High	Master Protein	Q3UQ44	Iqgap2	Ras GTPase-activating-like protein IQGAP2 [OS=Mus musculus]	0	14.863	2	4	8	1	1575	180.4	5.64	11.28			4			0	High	High	1	0		0		0		Oxidation [M906]
FALSE	High	Master Protein	Q3UQ84	Tars2	Threonine--tRNA ligase, mitochondrial [OS=Mus musculus]	0	22.952	10	6	9	6	723	81.6	7.87	3.72			6			0	High	High	1	0		0		0		Carbamidomethyl [C190]
FALSE	High	Master Protein	Q3UQN2	Fcho2	F-BAR domain only protein 2 [OS=Mus musculus]	0	14.574	6	4	4	4	809	88.7	6.89	4.36			4			0	High	High	1	0		0		0		Met-loss [N-Term]; Carbamidomethyl [C594]
FALSE	High	Master Protein	Q3URD3	Slmap	Sarcolemmal membrane-associated protein [OS=Mus musculus]	0	12.947	6	5	8	5	845	96.9	5.33	7.97			5			0	High	High	1	0		0		0
FALSE	High	Master Protein	Q3URE1	Acsf3	Acyl-CoA synthetase family member 3, mitochondrial [OS=Mus musculus]	0	16.829	10	5	8	5	583	65	8.02	10.26			5			0	High	High	1	0		0		0		Carbamidomethyl [C77; C83]
FALSE	High	Master Protein	Q3UV70	Pdp1	[Pyruvate dehydrogenase [acetyl-transferring]]-phosphatase 1, mitochondrial [OS=Mus musculus]	0	15.775	5	2	7	2	538	61.1	6.67	13.1			2			0	High	High	1	0		0		0
FALSE	High	Master Protein	Q3UVG3	Fam91a1	Protein FAM91A1 [OS=Mus musculus]	0	69.59	17	15	41	15	837	93.4	6.35	60.71			15			0	High	High	1	0		0		0		Carbamidomethyl [C123; C141; C185; C290; C479; C490]
FALSE	High	Master Protein	Q3UVK0	Ermp1	Endoplasmic reticulum metallopeptidase 1 [OS=Mus musculus]	0	57.045	16	12	28	12	898	100.1	7.49	50.84	3.92		11	1		0	High	High	1	0		1	Deamidated [Q314]	0		Deamidated [Q314]
FALSE	High	Master Protein	Q3UW53	Niban1	Protein Niban [OS=Mus musculus]	0	167.303	37	30	60	30	926	102.6	4.78	122.75			30			0	High	High	1	0		0		0		Carbamidomethyl [C41; C176; C193; C408; C515; C756; C802]
FALSE	High	Master Protein	Q3UX10	Tubal3	Tubulin alpha chain-like 3 [OS=Mus musculus]	0	76.64	10	6	56	1	446	50	5.58	114.67		8.17	5		1	0	High	High	1	0		0		0		Oxidation [M320; M405]; Carbamidomethyl [C322; C323]
FALSE	High	Master Protein	Q3UYI5	Rgl3	Ral guanine nucleotide dissociation stimulator-like 3 [OS=Mus musculus]	0	6.851	4	2	2	2	709	77.9	8.6	2.65			2			0	High	High	1	0		0		0
FALSE	High	Master Protein	Q3UYV9	Ncbp1	Nuclear cap-binding protein subunit 1 [OS=Mus musculus]	0	84.853	21	13	32	13	790	91.9	6.64	66.13			13			0	High	High	1	0		0		0		Carbamidomethyl [C320; C332; C409; C477; C483]; Oxidation [M405]
FALSE	High	Master Protein	Q3UZ39	Lrrfip1	Leucine-rich repeat flightless-interacting protein 1 [OS=Mus musculus]	0	117.255	32	15	34	10	729	79.2	4.82	90.97	5.85	3.01	14	2	1	0	High	High	1	0		2	Deamidated [N292; Q351]	0		Deamidated [N292; Q351]; Carbamidomethyl [C354; C381; C397; C444]
FALSE	High	Master Protein	Q3V009	Tmed1	Transmembrane emp24 domain-containing protein 1 [OS=Mus musculus]	0	31.921	22	4	8	4	227	25.2	4.5	22.6			4			0	High	High	1	0		0		0		Carbamidomethyl [C106]
FALSE	High	Master Protein	Q3V1H1	Ckap2	Cytoskeleton-associated protein 2 [OS=Mus musculus]	0	21.662	7	4	8	4	664	74	9.23	15.8			4			0	High	High	1	0		0		0
FALSE	High	Master Protein	Q3V1L4	Nt5c2	Cytosolic purine 5'-nucleotidase [OS=Mus musculus]	0	105.051	37	15	43	15	560	64.8	6.21	89.49			15			0	High	High	1	0		0		0		Carbamidomethyl [C181; C336; C433]; Oxidation [M455]
FALSE	High	Master Protein	Q3V1T4	P3h1	Prolyl 3-hydroxylase 1 [OS=Mus musculus]	0	82.838	31	17	38	17	739	83.6	5.14	69.22		2.45	16		1	0	High	High	1	0		0		0		Carbamidomethyl [C285; C571; C648]
FALSE	High	Master Protein	Q3V3R1	Mthfd1l	Monofunctional C1-tetrahydrofolate synthase, mitochondrial [OS=Mus musculus]	0	259.48	42	41	134	41	977	105.7	7.02	315.46	3.67	0	39	1	1	0	High	High	1	0		1	Deamidated [N170]	0		Carbamidomethyl [C197; C249; C450; C813; C827; C905]; Oxidation [M748]; Deamidated [N170]
FALSE	High	Master Protein	Q3V3R4	Itga1	Integrin alpha-1 [OS=Mus musculus]	0	10.946	2	2	2	2	1179	130.7	6.2	4.75			2			0	High	Not Found	1	0		0		0		Carbamidomethyl [C297]
FALSE	High	Master Protein	Q497H0	Zfand3	AN1-type zinc finger protein 3 [OS=Mus musculus]	0	10.155	17	3	4	3	227	25.1	7.15	5.95			3			0	High	High	1	0		0		0		Carbamidomethyl [C174; C192]
FALSE	High	Master Protein	Q497V5	Srbd1	S1 RNA-binding domain-containing protein 1 [OS=Mus musculus]	0	8.411	4	4	6	4	1015	114	8.78	0			4			0	High	High	1	0		0		0
FALSE	High	Master Protein	Q4KML4	Abracl	Costars family protein ABRACL [OS=Mus musculus]	0	10.98	31	2	5	2	81	9	5.8	16.41			2			0	High	High	1	1	Acetyl [N-Term]	0		0		Acetyl [N-Term]
FALSE	High	Master Protein	Q4KMM3	Oxr1	Isoform 4 of Oxidation resistance protein 1 [OS=Mus musculus]	0	334.724	48	35	114	35	839	92.6	5.25	298.88			35			0	High	High	1	0		0		0		Oxidation [M626]
FALSE	High	Master Protein	Q4PJX1	Odr4	Protein odr-4 homolog [OS=Mus musculus]	0	47.654	18	7	14	7	447	50	6.14	22.9			7			0	High	High	1	0		0		0		Carbamidomethyl [C231; C352]
FALSE	High	Master Protein	Q4PZA2	Ece1	Endothelin-converting enzyme 1 [OS=Mus musculus]	0	6.738	5	3	4	3	769	87	5.91	5.84			3			0	High	High	1	0		0		0
FALSE	High	Master Protein	Q4U4S6	Xirp2	Xin actin-binding repeat-containing protein 2 [OS=Mus musculus]	0.002	3.689	1	2	2	1	3784	428	6.18	1.6			2			0	High	Not Found	1	0		0		0
FALSE	High	Master Protein	Q4V9W2	Srek1ip1	protein SREK1IP1 [OS=Mus musculus]	0	9.773	16	2	5	2	153	18.1	9.91	4.03			2			0	High	High	1	0		0		0		Carbamidomethyl [C6; C18; C28]; Met-loss+Acetyl [N-Term]
FALSE	High	Master Protein	Q4VA53	Pds5b	Sister chromatid cohesion protein PDS5 homolog B [OS=Mus musculus]	0	96.227	16	18	33	16	1446	164.3	8.5	68.94	2.33		18	1		0	High	High	1	0		1	Deamidated [Q461]	0		Carbamidomethyl [C317; C943; C946]; Deamidated [Q461]
FALSE	High	Master Protein	Q4VAA2	Cdv3	Protein CDV3 [OS=Mus musculus]	0	109.377	56	13	42	13	281	29.7	6.1	87.69			13			0	High	High	1	0		0		0		Oxidation [M187]
FALSE	High	Master Protein	Q4VAE3	Tmem65	Transmembrane protein 65 [OS=Mus musculus]	0	13.357	13	3	6	3	234	24.9	7.78	8.61			3			0	High	High	1	0		0		0
FALSE	High	Master Protein	Q4VBD2	Tapt1	Transmembrane anterior posterior transformation protein 1 [OS=Mus musculus]	0	6.829	5	3	3	3	564	63.9	8.22	2.51			3			0	High	High	1	0		0		0
FALSE	High	Master Protein	Q4VC33	Maea	Macrophage erythroblast attacher [OS=Mus musculus]	0	21.174	16	6	10	6	396	45.3	8.69	12.19			6			0	High	High	1	0		0		0		Carbamidomethyl [C178; C182]
FALSE	High	Master Protein	Q501J6	Ddx17	Probable ATP-dependent RNA helicase DDX17 [OS=Mus musculus]	0	165.296	46	30	100	21	650	72.4	8.59	207.44			30			0	High	High	1	0		0		0		Carbamidomethyl [C168; C198; C219; C368; C505]; Oxidation [M132; M251; M254; M275]
FALSE	High	Master Protein	Q501J7	Phactr4	Phosphatase and actin regulator 4 [OS=Mus musculus]	0	20.798	7	3	5	3	694	76.6	6.48	13.85			3			0	High	High	1	0		0		0
FALSE	High	Master Protein	Q505D1	Ankrd28	serine/threonine-protein phosphatase 6 regulatory ankyrin repeat subunit A [OS=Mus musculus]	0	75.936	18	13	20	13	1053	112.8	6.27	50.98			13			0	High	High	1	0		0		0		Carbamidomethyl [C201; C472; C701; C898]
FALSE	High	Master Protein	Q505F5	Lrrc47	Leucine-rich repeat-containing protein 47 [OS=Mus musculus]	0	93.659	38	17	32	17	581	63.6	8.1	68.56			17			0	High	High	1	0		0		0		Carbamidomethyl [C527; C544]
FALSE	High	Master Protein	Q52KI8	Srrm1	Serine/arginine repetitive matrix protein 1 [OS=Mus musculus]	0	48.929	11	7	19	7	946	106.8	11.87	41.17			7			0	High	High	1	0		0		0		Carbamidomethyl [C33]
FALSE	High	Master Protein	Q52KR3	Prune2	Protein prune homolog 2 [OS=Mus musculus]	0	53.454	5	13	36	12	3084	339.3	4.46	54.57			13			0	High	High	1	0		0		0		Carbamidomethyl [C1460]
FALSE	High	Master Protein	Q569Z5	Ddx46	probable ATP-dependent RNA helicase DDX46 [OS=Mus musculus]	0	123.069	25	24	61	24	1032	117.4	9.26	115.01			24			0	High	High	1	0		0		0		Oxidation [M506]; Carbamidomethyl [C377; C478; C590]
FALSE	High	Master Protein	Q569Z6	Thrap3	Thyroid hormone receptor-associated protein 3 [OS=Mus musculus]	0	8.942	3	3	4	3	951	108.1	10.17	4.91			3			0	High	High	1	0		0		0
FALSE	High	Master Protein	Q56A07	Scn2b	Sodium channel subunit beta-2 [OS=Mus musculus]	0	4.989	4	2	7	2	215	24.2	6.54	7.63		3.09	1		1	0	High	High	1	0		0		0
FALSE	High	Master Protein	Q56A08	Gpkow	G patch domain and KOW motifs-containing protein [OS=Mus musculus]	0	15.194	7	2	6	2	488	53.8	8.07	19.88			2			0	High	High	1	0		0		0
FALSE	High	Master Protein	Q570Y9	Deptor	DEP domain-containing mTOR-interacting protein [OS=Mus musculus]	0	52.965	32	9	22	9	409	46.1	7.91	50.22			9			0	High	High	1	0		0		0		Carbamidomethyl [C247; C350]
FALSE	High	Master Protein	Q571I9	Aldh16a1	Aldehyde dehydrogenase family 16 member A1 [OS=Mus musculus]	0	47.278	14	9	22	9	802	84.7	6.32	57.01			9			0	High	High	1	0		0		0		Carbamidomethyl [C467]
FALSE	High	Master Protein	Q58A65	Spag9	Isoform 2 of C-Jun-amino-terminal kinase-interacting protein 4 [OS=Mus musculus]	0	102.21	24	25	56	20	1307	144.6	5.15	81.7			25			0	High	High	1	0		0		0
FALSE	High	Master Protein	Q59J78	Ndufaf2	NADH dehydrogenase [ubiquinone] 1 alpha subcomplex assembly factor 2 [OS=Mus musculus]	0	20.781	31	4	5	4	168	19.6	8.25	12.38			4			0	High	High	1	0		0		0
FALSE	High	Master Protein	Q5BLK4	Tut7	terminal uridylyltransferase 7 [OS=Mus musculus]	0	67.808	13	17	29	16	1491	169	6.65	39.36			17			0	High	High	1	0		0		0		Carbamidomethyl [C249; C398; C1154]; Met-loss+Acetyl [N-Term]
FALSE	High	Master Protein	Q5DTJ9	Mypn	Myopalladin [OS=Mus musculus]	0	7.598	2	2	6	1	1315	144	6.54	9.54			2			0	Not Found	High	1	0		0		0		Met-loss [N-Term]; Carbamidomethyl [C1252]
FALSE	High	Master Protein	Q5DTM8	Rnf20	E3 ubiquitin-protein ligase BRE1A [OS=Mus musculus]	0	13.94	6	5	12	4	973	113.5	5.96	10.87			5			0	High	High	1	0		0		0		Carbamidomethyl [C958]
FALSE	High	Master Protein	Q5DTN8	Jakmip3	Janus kinase and microtubule-interacting protein 3 [OS=Mus musculus]	0.002	3.517	2	2	2	2	844	98.7	5.74	0			2			0	Not Found	High	1	0		0		0
FALSE	High	Master Protein	Q5DTZ0	Nynrin	Protein NYNRIN [OS=Mus musculus]	0.006	2.727	2	2	2	2	1840	202.9	6.99	2.15			2			0	Not Found	High	1	0		0		0
FALSE	High	Master Protein	Q5DU41	Lrrc8b	Volume-regulated anion channel subunit LRRC8B [OS=Mus musculus]	0.001	3.94	3	2	2	1	803	92.1	6.7	1.61			2			0	Not Found	High	1	0		0		0		Carbamidomethyl [C159]
FALSE	High	Master Protein	Q5EBG6	Hspb6	Heat shock protein beta-6 [OS=Mus musculus]	0	6.353	16	2	2	2	162	17.5	6	4.88			2			0	High	High	1	0		0		0
FALSE	High	Master Protein	Q5EG47	Prkaa1	5'-AMP-activated protein kinase catalytic subunit alpha-1 [OS=Mus musculus]	0	127.139	42	20	46	20	559	63.9	8.12	86.6	3.31	4.27	19	1	1	0	High	High	1	0		1	Deamidated [N189]	0		Carbamidomethyl [C141; C185; C425]; Deamidated [N189]
FALSE	High	Master Protein	Q5F2E7	Nufip2	Nuclear fragile X mental retardation-interacting protein 2 [OS=Mus musculus]	0	71.048	23	11	24	11	692	75.6	8.7	54.53			11			0	High	High	1	0		0		0
FALSE	High	Master Protein	Q5F2E8	Taok1	Serine/threonine-protein kinase TAO1 [OS=Mus musculus]	0	24.894	9	8	13	6	1001	116	7.55	12.67			8			0	High	High	1	0		0		0
FALSE	High	Master Protein	Q5FWI3	Cemip2	Cell surface hyaluronidase [OS=Mus musculus]	0	5.368	4	2	2	2	1383	153.7	7.78	2.08		2.04	1		1	0	High	Not Found	1	0		0		0
FALSE	High	Master Protein	Q5FWK3	Arhgap1	rho GTPase-activating protein 1 [OS=Mus musculus]	0	134.268	46	20	66	20	439	50.4	6.44	144.86		14.36	19		1	0	High	High	1	0		0		0		Carbamidomethyl [C91]
FALSE	High	Master Protein	Q5H8C4	Vps13a	Vacuolar protein sorting-associated protein 13a [OS=Mus musculus]	0	18.357	2	5	5	5	3166	359.2	6.19	6.76			5			0	Not Found	High	1	0		0		0
FALSE	High	Master Protein	Q5I012	Slc38a10	Putative sodium-coupled neutral amino acid transporter 10 [OS=Mus musculus]	0	15.048	4	2	2	2	1090	117.1	5.96	4.76			2			0	High	High	1	0		0		0
FALSE	High	Master Protein	Q5IRJ6	Slc30a9	zinc transporter 9 [OS=Mus musculus]	0	5.756	4	2	3	2	567	62.8	8.69	0			2			0	High	High	1	0		0		0
FALSE	High	Master Protein	Q5KU39	Vps41	Vacuolar protein sorting-associated protein 41 homolog [OS=Mus musculus]	0	7.919	3	2	3	2	853	98.5	5.81	5.35			2			0	High	High	1	0		0		0
FALSE	High	Master Protein	Q5M8N0	Cnrip1	CB1 cannabinoid receptor-interacting protein 1 [OS=Mus musculus]	0	12.008	16	2	3	2	164	18.6	7.96	7.71			2			0	High	Not Found	1	0		0		0
FALSE	High	Master Protein	Q5M8N4	Sdr39u1	Epimerase family protein sdr39u1 [OS=Mus musculus]	0	9.613	10	3	6	3	308	33	8.91	2.96		3.84	2		1	0	High	High	1	0		0		0
FALSE	High	Master Protein	Q5NBU8	Xaf1	XIAP-associated factor 1 [OS=Mus musculus]	0	28.927	23	4	5	4	273	31.1	8.54	10.95			4			0	High	Not Found	1	0		0		0		Carbamidomethyl [C34; C37; C241; C242; C244]
FALSE	High	Master Protein	Q5NC05	Ttf2	transcription termination factor 2 [OS=Mus musculus]	0	19.913	6	5	7	5	1138	125.5	8.9	12.26			5			0	High	High	1	0		0		0		Carbamidomethyl [C445]
FALSE	High	Master Protein	Q5NCF2	Trappc1	trafficking protein particle complex subunit 1 [OS=Mus musculus]	0	10.121	23	3	5	3	145	16.9	9.16	6.23			3			0	High	High	1	0		0		0		Carbamidomethyl [C15]
FALSE	High	Master Protein	Q5PR73	Diras2	GTP-binding protein Di-Ras2 [OS=Mus musculus]	0	17.321	16	2	5	2	199	22.5	8.76	10			2			0	Not Found	High	1	0		0		0		Carbamidomethyl [C55]
FALSE	High	Master Protein	Q5PRF0	Heatr5a	HEAT repeat-containing protein 5A [OS=Mus musculus]	0	17.863	3	7	16	7	2038	219.8	6.76	10.89			7			0	High	High	1	0		0		0		Carbamidomethyl [C872; C1227; C1229; C1635]
FALSE	High	Master Protein	Q5RJH6	Smg7	Protein SMG7 [OS=Mus musculus]	0	9.263	3	3	4	3	1138	126.8	7.99	3.99			3			0	High	High	1	0		0		0
FALSE	High	Master Protein	Q5RKZ7	Mocs1	Molybdenum cofactor biosynthesis protein 1 [OS=Mus musculus]	0	8.331	5	3	3	3	636	69.8	9.14	0			3			0	Not Found	High	1	0		0		0
FALSE	High	Master Protein	Q5SF07	Igf2bp2	Insulin-like growth factor 2 mRNA-binding protein 2 [OS=Mus musculus]	0	121.664	35	18	47	17	592	65.5	8.03	108.97			18			0	High	High	1	0		0		0		Carbamidomethyl [C248]
FALSE	High	Master Protein	Q5SFM8	Rbm27	RNA-binding protein 27 [OS=Mus musculus]	0	10.15	2	3	7	1	1060	118.5	9.19	10.39			3			0	High	High	1	0		0		0
FALSE	High	Master Protein	Q5SNZ0	Ccdc88a	Girdin [OS=Mus musculus]	0	22.847	2	3	5	3	1873	215.8	6.24	15.35			3			0	High	High	1	0		0		0		Carbamidomethyl [C1310]
FALSE	High	Master Protein	Q5SRY7	Fbxw11	F-box/WD repeat-containing protein 11 [OS=Mus musculus]	0.001	4.182	4	2	2	2	542	62	7.12	0			2			0	Not Found	High	1	0		0		0		Carbamidomethyl [C145; C151]
FALSE	High	Master Protein	Q5SS80	Dhrs13	Dehydrogenase/reductase SDR family member 13 [OS=Mus musculus]	0	41.461	27	8	20	8	376	40.7	7.93	43.85			8			0	High	High	1	0		0		0		Carbamidomethyl [C28; C128; C185; C285]
FALSE	High	Master Protein	Q5SSH7	Zzef1	Zinc finger ZZ-type and EF-hand domain-containing protein 1 [OS=Mus musculus]	0	36.371	4	9	11	9	2924	328.1	6.11	10.87			9			0	High	High	1	0		0		0		Carbamidomethyl [C535; C719; C2192]
FALSE	High	Master Protein	Q5SSL4	Abr	active breakpoint cluster region-related protein [OS=Mus musculus]	0	32.752	12	10	18	8	859	97.6	6.58	18.37			10			0	High	High	1	0		0		0		Carbamidomethyl [C569; C667; C756]
FALSE	High	Master Protein	Q5SSW2	Psme4	Proteasome activator complex subunit 4 [OS=Mus musculus]	0	62.439	9	13	23	13	1843	211.1	7.01	37.75			13			0	High	High	1	0		0		0		Carbamidomethyl [C1100]
FALSE	High	Master Protein	Q5SSZ5	Tns3	Tensin-3 [OS=Mus musculus]	0	224.731	31	29	76	13	1440	155.5	6.65	176.15	7.26		29	2		0	High	High	1	0		2	Deamidated [Q35; Q208]	0		Carbamidomethyl [C25; C739; C881; C970; C1236; C1246; C1260; C1271; C1306; C1410]; Deamidated [Q35; Q208]
FALSE	High	Master Protein	Q5SUF2	Luc7l3	Luc7-like protein 3 [OS=Mus musculus]	0	52.801	16	7	12	7	432	51.4	9.77	37.58			7			0	High	High	1	0		0		0
FALSE	High	Master Protein	Q5SUQ9	Ctc1	CST complex subunit CTC1 [OS=Mus musculus]	0	29.369	4	4	7	4	1212	133.9	8.12	20.28			4			0	High	High	1	0		0		0		Carbamidomethyl [C533]
FALSE	High	Master Protein	Q5SUR0	Pfas	Phosphoribosylformylglycinamidine synthase [OS=Mus musculus]	0	344.144	41	37	126	37	1337	144.5	5.67	323.9	19.2		36	2		0	High	High	1	0		3	Deamidated [Q869; Q1268; N1272]	0		Carbamidomethyl [C108; C270; C294; C502; C512; C584; C587; C606; C763; C870; C974; C1026; C1055; C1284]; Oxidation [M988; M1217]; Deamidated [Q869; Q1268; N1272]
FALSE	High	Master Protein	Q5SVQ0	Kat7	Histone acetyltransferase KAT7 [OS=Mus musculus]	0	7.952	5	2	2	2	613	70.6	8.72	4.07			2			0	Not Found	High	1	0		0		0
FALSE	High	Master Protein	Q5SVR0	Tbc1d9b	TBC1 domain family member 9B [OS=Mus musculus]	0	24.66	6	7	10	7	1263	141.7	5.29	11.56			7			0	High	High	1	0		0		0		Carbamidomethyl [C308; C1110]
FALSE	High	Master Protein	Q5SW19	Cluh	Clustered mitochondria protein homolog [OS=Mus musculus]	0	101.218	20	23	51	23	1315	148	6.02	80.19			23			0	High	High	1	0		0		0		Carbamidomethyl [C184; C200; C214; C333; C1198]
FALSE	High	Master Protein	Q5SWD9	Tsr1	Pre-rRNA-processing protein TSR1 homolog [OS=Mus musculus]	0	134.726	30	24	59	3	803	92	6.99	110.59		4.1	23		1	0	High	High	1	0		0		0		Carbamidomethyl [C617]; Oxidation [M590]
FALSE	High	Master Protein	Q5SWU9	Acaca	Acetyl-CoA carboxylase 1 [OS=Mus musculus]	0	303.086	30	59	135	59	2345	265.1	6.39	234.07			59			0	High	High	1	1	Acetyl [N-Term]	0		0		Carbamidomethyl [C406; C499; C742; C812; C1395; C1768]; Acetyl [N-Term]
FALSE	High	Master Protein	Q5SYD0	Myo1d	Unconventional myosin-Id [OS=Mus musculus]	0	5.403	3	3	3	3	1006	116	9.41	0			3			0	High	Not Found	1	0		0		0
FALSE	High	Master Protein	Q5U3K5	Rabl6	Rab-like protein 6 [OS=Mus musculus]	0	27.852	10	6	17	6	725	79.8	5.53	21.65			6			0	High	High	1	0		0		0		Carbamidomethyl [C172; C501]
FALSE	High	Master Protein	Q5U430	Ubr3	E3 ubiquitin-protein ligase UBR3 [OS=Mus musculus]	0	16.159	3	5	7	5	1889	212.6	5.9	5.67			5			0	High	High	1	0		0		0		Carbamidomethyl [C170; C172; C197; C1859]
FALSE	High	Master Protein	Q5U458	Dnajc11	DnaJ homolog subfamily C member 11 [OS=Mus musculus]	0	35.451	23	11	21	11	559	63.2	8.32	22.53			11			0	High	High	1	0		0		0		Carbamidomethyl [C38; C518]
FALSE	High	Master Protein	Q5XG73	Acbd5	Acyl-CoA-binding domain-containing protein 5 [OS=Mus musculus]	0	23.045	12	5	9	5	508	56.6	5.41	20.86			5			0	High	High	1	0		0		0
FALSE	High	Master Protein	Q5XJY4	Parl	Presenilins-associated rhomboid-like protein, mitochondrial [OS=Mus musculus]	0	11.762	8	3	7	3	377	41.9	9.92	9.87			3			0	High	High	1	0		0		0
FALSE	High	Master Protein	Q5XJY5	Arcn1	Coatomer subunit delta [OS=Mus musculus]	0	210.115	49	32	138	32	511	57.2	6.21	256.3			32			0	High	High	1	0		0		0		Carbamidomethyl [C9; C94; C286; C441; C479]; Met-loss [N-Term]; Oxidation [M61; M254; M271; M276]
FALSE	High	Master Protein	Q5Y5T1	Zdhhc20	Probable palmitoyltransferase ZDHHC20 [OS=Mus musculus]	0	26.407	19	6	11	6	380	43.9	8.25	15.97	0		6	1		0	High	High	1	0		1	Deamidated [Q318]	0		Deamidated [Q318]; Met-loss [N-Term]
FALSE	High	Master Protein	Q60575	Kif1b	Kinesin-like protein KIF1B [OS=Mus musculus]	0	29.598	4	6	10	4	1816	204	5.62	16.87			6			0	High	High	1	0		0		0
FALSE	High	Master Protein	Q60596	Xrcc1	DNA repair protein XRCC1 [OS=Mus musculus]	0	35.392	13	6	8	6	631	68.9	6.33	11.11			6			0	High	High	1	0		0		0		Carbamidomethyl [C12; C20; C389]
FALSE	High	Master Protein	Q60597	Ogdh	2-oxoglutarate dehydrogenase, mitochondrial [OS=Mus musculus]	0	273.248	48	43	110	43	1023	116.4	6.83	257.65	8.32	4.39	41	2	1	0	High	High	1	0		2	Deamidated [N476; N773]	0		Carbamidomethyl [C283; C331; C395; C487; C507; C566; C604; C904; C956]; Deamidated [N476; N773]; Oxidation [M484; M875]
FALSE	High	Master Protein	Q60598	Cttn	Src substrate cortactin [OS=Mus musculus]	0	171.43	41	28	116	28	546	61.2	5.4	185.28		4.45	27		1	0	High	High	1	0		0		0		Carbamidomethyl [C246]; Oxidation [M129]
FALSE	High	Master Protein	Q60605	Myl6	Myosin light polypeptide 6 [OS=Mus musculus]	0	113.511	79	12	54	12	151	16.9	4.65	146.36	7.42		12	2		0	High	High	1	0		2	Deamidated [N45; N101]	0		Deamidated [N45; N101]; Oxidation [M36; M73; M105]; Carbamidomethyl [C2; C32]; Met-loss+Acetyl [N-Term]
FALSE	High	Master Protein	Q60631	Grb2	Growth factor receptor-bound protein 2 [OS=Mus musculus]	0	74.579	64	15	42	15	217	25.2	6.32	85.25			15			0	High	High	1	0		0		0		Carbamidomethyl [C32; C198]
FALSE	High	Master Protein	Q60634	Flot2	Flotillin-2 [OS=Mus musculus]	0	13.235	9	3	4	3	428	47	5.2	6.84	3.06		2	1		0	High	High	1	0		0		0
FALSE	High	Master Protein	Q60648	Gm2a	Ganglioside GM2 activator [OS=Mus musculus]	0	17.944	24	5	19	5	193	20.8	5.9	24.28		7.34	4		1	0	High	High	1	0		0		0		Carbamidomethyl [C39]
FALSE	High	Master Protein	Q60651	Klra4	Killer cell lectin-like receptor 4 [OS=Mus musculus]	0	14.989	15	4	10	4	263	30.9	8.66	2.06			4			0	High	High	1	0		0		0		Carbamidomethyl [C233]
FALSE	High	Master Protein	Q60668	Hnrnpd	heterogeneous nuclear ribonucleoprotein D0 [OS=Mus musculus]	0	148.535	38	18	69	16	355	38.3	7.81	156.95			18			0	High	High	1	0		0		0		Carbamidomethyl [C126; C226]
FALSE	High	Master Protein	Q60676	Ppp5c	Serine/threonine-protein phosphatase 5 [OS=Mus musculus]	0	65.096	33	13	37	13	499	56.8	6.2	51.84			13			0	High	High	1	0		0		0		Carbamidomethyl [C11; C77; C382; C404; C442; C452]
FALSE	High	Master Protein	Q60680	Chuk	Inhibitor of nuclear factor kappa-B kinase subunit alpha [OS=Mus musculus]	0	4.841	3	2	3	1	745	84.7	6.77	1.91			2			0	High	Not Found	1	0		0		0		Carbamidomethyl [C113; C114]
FALSE	High	Master Protein	Q60692	Psmb6	Proteasome subunit beta type-6 [OS=Mus musculus]	0	62.835	37	8	41	8	238	25.4	5.11	89.6	3.03		8	1		0	High	High	1	0		1	Deamidated [Q187]	0		Carbamidomethyl [C76; C77; C185]; Deamidated [Q187]; Oxidation [M180; M197]
FALSE	High	Master Protein	Q60710	Samhd1	deoxynucleoside triphosphate triphosphohydrolase SAMHD1 [OS=Mus musculus]	0	239.28	60	38	102	38	627	72.6	7.96	191.17	2.27		38	1		0	High	High	1	1	Acetyl [N-Term]	0		0		Carbamidomethyl [C52; C104; C178; C321; C342; C533; C584; C614]; Acetyl [N-Term]
FALSE	High	Master Protein	Q60715	P4ha1	prolyl 4-hydroxylase subunit alpha-1 [OS=Mus musculus]	0	242.888	51	29	134	2	534	60.9	5.9	303.7	11.59	3.21	27	1	1	0	High	High	1	0		2	Deamidated [Q402; Q416]	0		Carbamidomethyl [C167; C293; C503]; Deamidated [Q402; Q416]
FALSE	High	Master Protein	Q60716	P4ha2	Isoform IIa of Prolyl 4-hydroxylase subunit alpha-2 [OS=Mus musculus]	0	231.293	56	29	113	29	535	60.8	6	257.08	4.59	11.58	27	1	2	0	High	High	1	0		1	Deamidated [Q323]	0		Carbamidomethyl [C296; C504; C510; C529]; Oxidation [M347; M404; M425]; Deamidated [Q323]
FALSE	High	Master Protein	Q60737	Csnk2a1	Casein kinase II subunit alpha [OS=Mus musculus]	0	133.137	54	18	46	17	391	45.1	7.74	109.81			18			0	High	High	1	0		0		0		Carbamidomethyl [C147]
FALSE	High	Master Protein	Q60739	Bag1	BAG family molecular chaperone regulator 1 [OS=Mus musculus]	0	13.155	11	4	11	4	355	39.7	8.46	11.82			4			0	High	High	1	0		0		0
FALSE	High	Master Protein	Q60749	Khdrbs1	KH domain-containing, RNA-binding, signal transduction-associated protein 1 [OS=Mus musculus]	0	32.897	20	7	22	7	443	48.3	8.72	20.56			7			0	High	High	1	0		0		0
FALSE	High	Master Protein	Q60751	Igf1r	Insulin-like growth factor 1 receptor [OS=Mus musculus]	0	11.657	4	5	7	4	1373	155.7	5.74	3.91			5			0	High	High	1	0		0		0		Carbamidomethyl [C880]
FALSE	High	Master Protein	Q60759	Gcdh	Glutaryl-CoA dehydrogenase, mitochondrial [OS=Mus musculus]	0	41.682	17	5	9	5	438	48.6	8.73	23.06	2.41		5	1		0	High	High	1	0		1	Deamidated [N183]	0		Carbamidomethyl [C176]; Deamidated [N183]
FALSE	High	Master Protein	Q60760	Grb10	Growth factor receptor-bound protein 10 [OS=Mus musculus]	0	37.183	13	7	10	7	621	70.5	9.07	28.32			7			0	High	Not Found	1	0		0		0		Carbamidomethyl [C173; C408; C417]
FALSE	High	Master Protein	Q60766	Irgm1	Immunity-related GTPase family M protein 1 [OS=Mus musculus]	0	51.216	23	10	22	10	409	46.5	8.28	33.71			10			0	High	High	1	0		0		0		Carbamidomethyl [C303]; Oxidation [M300]
FALSE	High	Master Protein	Q60767	Ly75	Lymphocyte antigen 75 [OS=Mus musculus]	0	149.465	22	29	58	29	1723	197.2	6.39	92.7		4.17	28		1	0	High	High	1	0		0		0		Carbamidomethyl [C83; C110; C150; C317; C462; C678; C790; C981; C1278; C1512; C1547; C1564]
FALSE	High	Master Protein	Q60770	Stxbp3	syntaxin-binding protein 3 [OS=Mus musculus]	0	40.452	20	12	21	12	592	67.9	8.02	21.28			12			0	High	High	1	0		0		0		Carbamidomethyl [C90; C558]
FALSE	High	Master Protein	Q60778	Nfkbib	NF-kappa-B inhibitor beta [OS=Mus musculus]	0	9.087	9	2	3	2	359	37.9	4.74	2.64			2			0	High	High	1	0		0		0		Carbamidomethyl [C240]
FALSE	High	Master Protein	Q60790	Rasa3	Ras GTPase-activating protein 3 [OS=Mus musculus]	0	38.52	14	10	13	10	834	95.9	7.34	14.29			10			0	High	High	1	0		0		0		Carbamidomethyl [C144; C328; C410]
FALSE	High	Master Protein	Q60805	Mertk	Tyrosine-protein kinase Mer [OS=Mus musculus]	0	6.203	2	2	3	1	994	110.1	5.5	5.42			2			0	Not Found	High	1	0		0		0
FALSE	High	Master Protein	Q60809	Cnot7	CCR4-NOT transcription complex subunit 7 [OS=Mus musculus]	0	28.335	22	5	9	5	285	32.7	4.84	20.26			5			0	High	High	1	0		0		0		Carbamidomethyl [C13; C18]
FALSE	High	Master Protein	Q60823	Akt2	RAC-beta serine/threonine-protein kinase [OS=Mus musculus]	0	67.583	30	13	29	8	481	55.7	6.37	33.31			13			0	High	High	1	0		0		0		Carbamidomethyl [C77; C297; C311]
FALSE	High	Master Protein	Q60838	Dvl2	Segment polarity protein dishevelled homolog DVL-2 [OS=Mus musculus]	0	78.668	21	11	26	9	736	78.8	5.96	63.43			11			0	High	High	1	0		0		0		Carbamidomethyl [C80; C354]; Met-loss+Acetyl [N-Term]
FALSE	High	Master Protein	Q60847	Col12a1	Collagen alpha-1(XII) chain [OS=Mus musculus]	0	127.135	12	29	38	29	3120	340	5.64	59.26			29			0	High	High	1	0		0		0
FALSE	High	Master Protein	Q60848	Hells	Lymphocyte-specific helicase [OS=Mus musculus]	0	50.576	16	13	25	13	821	95.1	8	27.86			13			0	High	High	1	0		0		0		Carbamidomethyl [C329; C456; C478]
FALSE	High	Master Protein	Q60854	Serpinb6	serpin B6 [OS=Mus musculus]	0	246.074	56	23	194	23	378	42.6	5.74	327.58	28.86		23	3		0	High	High	1	0		2	Deamidated [N65; N367]	0		Oxidation [M201; M202; M210; M264; M284; M293; M306]; Carbamidomethyl [C62; C102; C112; C372]; Deamidated [N65; N367]
FALSE	High	Master Protein	Q60855	Ripk1	Receptor-interacting serine/threonine-protein kinase 1 [OS=Mus musculus]	0	88.645	29	15	35	15	656	74.8	6.47	69.76			15			0	High	High	1	0		0		0		Carbamidomethyl [C257; C641; C642]
FALSE	High	Master Protein	Q60864	Stip1	stress-induced-phosphoprotein 1 [OS=Mus musculus]	0	544.047	65	53	199	53	543	62.5	6.8	490.46		3.61	52		1	0	High	High	1	1	Acetyl [N-Term]	0		0		Carbamidomethyl [C26; C370; C417; C420; C461; C471]; Oxidation [M115; M125; M214; M380; M472; M473; M490; M504; M535]; Acetyl [N-Term]
FALSE	High	Master Protein	Q60865	Caprin1	Caprin-1 [OS=Mus musculus]	0	79.992	26	15	45	15	707	78.1	5.25	84.07	5.26	5.67	14	1	1	0	High	High	1	0		1	Deamidated [Q90]	0		Deamidated [Q90]; Oxidation [M115]
FALSE	High	Master Protein	Q60866	Pter	Phosphotriesterase-related protein [OS=Mus musculus]	0	9.256	7	2	3	2	349	39.2	6.67	4.67			2			0	High	High	1	0		0		0
FALSE	High	Master Protein	Q60870	Reep5	Receptor expression-enhancing protein 5 [OS=Mus musculus]	0	16.565	12	3	10	3	185	21	8.38	25.26			3			0	High	High	1	0		0		0		Carbamidomethyl [C14]
FALSE	High	Master Protein	Q60872	Eif1a	eukaryotic translation initiation factor 1A [OS=Mus musculus]	0	43.428	36	8	25	2	144	16.5	5.24	45.51		2.33	7		1	0	High	High	1	0		0		0		Carbamidomethyl [C51]
FALSE	High	Master Protein	Q60875	Arhgef2	Rho guanine nucleotide exchange factor 2 [OS=Mus musculus]	0	177.022	37	34	96	34	985	111.9	7.25	190.12			34			0	High	High	1	0		0		0		Carbamidomethyl [C68; C71; C307; C479; C574]; Oxidation [M966]
FALSE	High	Master Protein	Q60876	Eif4ebp1	Eukaryotic translation initiation factor 4E-binding protein 1 [OS=Mus musculus]	0	6.108	16	2	7	2	117	12.3	5.15	10.62			2			0	High	High	1	0		0		0		Carbamidomethyl [C7; C61]; Met-loss+Acetyl [N-Term]
FALSE	High	Master Protein	Q60902	Eps15l1	Epidermal growth factor receptor substrate 15-like 1 [OS=Mus musculus]	0	38.983	8	8	15	8	907	99.2	5.02	27.85			8			0	High	High	1	0		0		0
FALSE	High	Master Protein	Q60930	Vdac2	Voltage-dependent anion-selective channel protein 2 [OS=Mus musculus]	0	158.296	53	16	76	15	295	31.7	7.49	178.08		16.67	13		3	0	High	High	1	0		0		0		Carbamidomethyl [C4; C5; C9; C14; C48; C77; C104]; Met-loss+Acetyl [N-Term]; Oxidation [M13]
FALSE	High	Master Protein	Q60931	Vdac3	Voltage-dependent anion-selective channel protein 3 [OS=Mus musculus]	0	137.101	50	16	61	14	283	30.7	8.79	144.52		8.39	15		1	0	High	High	1	0		0		0		Oxidation [M26]; Carbamidomethyl [C2; C8; C36; C65]; Met-loss+Acetyl [N-Term]
FALSE	High	Master Protein	Q60932	Vdac1	Isoform Mt-VDAC1 of Voltage-dependent anion-selective channel protein 1 [OS=Mus musculus]	0	164.61	77	21	114	19	283	30.7	8.54	238.81	4.17	8.93	18	1	3	0	High	High	1	0		1	Deamidated [N239]	0		Carbamidomethyl [C127; C232]; Met-loss+Acetyl [N-Term]; Deamidated [N239]
FALSE	High	Master Protein	Q60949	Tbc1d1	TBC1 domain family member 1 [OS=Mus musculus]	0	21.171	5	6	10	5	1255	141.9	7.24	11.12			6			0	High	Not Found	1	0		0		0		Carbamidomethyl [C328]
FALSE	High	Master Protein	Q60953	Pml	Protein PML [OS=Mus musculus]	0	10.714	3	2	3	2	885	98.2	5.63	5.04			2			0	High	High	1	0		0		0
FALSE	High	Master Protein	Q60960	Kpna1	Importin subunit alpha-5 [OS=Mus musculus]	0	37.361	14	8	20	2	538	60.1	5.01	32.38			8			0	High	High	1	0		0		0		Carbamidomethyl [C240; C359]; Met-loss+Acetyl [N-Term]
FALSE	High	Master Protein	Q60967	Papss1	bifunctional 3'-phosphoadenosine 5'-phosphosulfate synthase 1 [OS=Mus musculus]	0	127.903	42	24	68	23	624	70.7	6.77	134.07			24			0	High	High	1	1	Acetyl [N-Term]	0		0		Oxidation [M22; M606]; Carbamidomethyl [C8; C53; C78; C83]; Acetyl [N-Term]
FALSE	High	Master Protein	Q60972	Rbbp4	Histone-binding protein RBBP4 [OS=Mus musculus]	0	99.376	30	14	52	7	425	47.6	4.89	102.82			14			0	High	High	1	0		0		0		Carbamidomethyl [C138; C167]; Met-loss+Acetyl [N-Term]; Oxidation [M133]
FALSE	High	Master Protein	Q60973	Rbbp7	Histone-binding protein RBBP7 [OS=Mus musculus]	0	161.703	44	19	75	12	425	47.8	5.05	167.81	6.63	8.04	18	1	1	0	High	High	1	0		1	Deamidated [Q353]	0		Oxidation [M6; M132]; Carbamidomethyl [C97; C116; C166]; Deamidated [Q353]; Met-loss+Acetyl [N-Term]
FALSE	High	Master Protein	Q60989	Xiap	E3 ubiquitin-protein ligase XIAP [OS=Mus musculus]	0	4.267	5	2	4	2	496	56	6.23	3.49			2			0	High	High	1	0		0		0
FALSE	High	Master Protein	Q60991	Cyp7b1	25-hydroxycholesterol 7-alpha-hydroxylase [OS=Mus musculus]	0	44.915	20	11	30	11	507	58.4	9.09	44.27			11			0	High	High	1	0		0		0		Carbamidomethyl [C361]; Oxidation [M485]
FALSE	High	Master Protein	Q60996	Ppp2r5c	Serine/threonine-protein phosphatase 2A 56 kDa regulatory subunit gamma isoform [OS=Mus musculus]	0	18.502	8	4	13	3	524	60.8	6.64	19.71			4			0	High	High	1	0		0		0		Carbamidomethyl [C334]
FALSE	High	Master Protein	Q61009	Scarb1	Scavenger receptor class B member 1 [OS=Mus musculus]	0	11.286	8	4	6	4	509	56.7	8.09	8.6			4			0	High	High	1	0		0		0
FALSE	High	Master Protein	Q61024	Asns	Asparagine synthetase [glutamine-hydrolyzing] [OS=Mus musculus]	0	270.276	56	32	138	32	561	64.2	6.58	287.82	20.56	16.13	29	3	3	0	High	High	1	0		3	Deamidated [N38; N75; N193]	0		Oxidation [M59; M149; M201; M498; M538]; Carbamidomethyl [C43; C44; C73; C158; C207; C455]; Deamidated [N38; N75; N193]
FALSE	High	Master Protein	Q61029	Tmpo	Lamina-associated polypeptide 2, isoforms beta/delta/epsilon/gamma [OS=Mus musculus]	0	146.168	50	18	62	9	452	50.3	9.45	130.46	3.55	3.87	17	1	1	0	High	High	1	0		1	Deamidated [Q224]	0		Carbamidomethyl [C362]; Met-loss [N-Term]; Deamidated [Q224]
FALSE	High	Master Protein	Q61033	Tmpo	Lamina-associated polypeptide 2, isoforms alpha/zeta [OS=Mus musculus]	0	109.771	28	16	48	7	693	75.1	8.05	96.21			16			0	High	High	1	0		0		0		Carbamidomethyl [C328; C443]; Met-loss [N-Term]
FALSE	High	Master Protein	Q61035	Hars1	Histidine--tRNA ligase, cytoplasmic [OS=Mus musculus]	0	123.649	38	20	58	17	509	57.4	6	125.11			20			0	High	High	1	0		0		0		Carbamidomethyl [C224; C235]
FALSE	High	Master Protein	Q61036	Pak3	Serine/threonine-protein kinase PAK 3 [OS=Mus musculus]	0	136.152	38	20	53	9	559	62.4	5.4	111.18			20			0	High	High	1	0		0		0		Carbamidomethyl [C386; C424; C514]; Met-loss+Acetyl [N-Term]; Oxidation [M444]
FALSE	High	Master Protein	Q61048	Wbp4	WW domain-binding protein 4 [OS=Mus musculus]	0	17.549	9	3	6	3	376	42.1	7.36	11.65			3			0	High	High	1	0		0		0		Carbamidomethyl [C18]
FALSE	High	Master Protein	Q61062	Dvl3	segment polarity protein dishevelled homolog DVL-3 [OS=Mus musculus]	0	23.774	9	6	13	3	716	78.1	6.65	11.38			6			0	High	High	1	0		0		0		Carbamidomethyl [C69]
FALSE	High	Master Protein	Q61072	Adam9	disintegrin and metalloproteinase domain-containing protein 9 [OS=Mus musculus]	0	62.083	18	11	27	11	845	92	7.47	41.62			11			0	High	High	1	0		0		0		Carbamidomethyl [C370; C401; C417; C428; C430; C436; C441; C442; C447; C455; C460; C461; C464; C473; C539; C553; C662; C664; C673]
FALSE	High	Master Protein	Q61074	Ppm1g	Protein phosphatase 1G [OS=Mus musculus]	0	72.131	24	11	28	11	542	58.7	4.39	55.74			11			0	High	High	1	0		0		0
FALSE	High	Master Protein	Q61081	Cdc37	Hsp90 co-chaperone Cdc37 [OS=Mus musculus]	0	152.274	41	17	58	17	379	44.6	5.34	147.11			17			0	High	High	1	0		0		0		Carbamidomethyl [C337]; Oxidation [M113; M317]
FALSE	High	Master Protein	Q61090	Fzd7	Frizzled-7 [OS=Mus musculus]	0	19.035	9	6	18	3	572	63.7	7.91	15.57			6			0	High	High	1	0		0		0		Carbamidomethyl [C94; C131; C208; C228; C232]
FALSE	High	Master Protein	Q61097	Ksr1	kinase suppressor of Ras 1 [OS=Mus musculus]	0	11.35	4	4	5	4	873	96.7	8.54	3.49			4			0	High	High	1	0		0		0
FALSE	High	Master Protein	Q61102	Abcb7	ATP-binding cassette sub-family B member 7, mitochondrial [OS=Mus musculus]	0	7.57	3	2	4	2	752	82.5	9.32	4.56			2			0	High	High	1	0		0		0
FALSE	High	Master Protein	Q61107	Gbp4	Guanylate-binding protein 4 [OS=Mus musculus]	0	114.841	35	17	26	17	620	70.8	6.64	73.08			17			0	High	Not Found	1	0		0		0		Carbamidomethyl [C227; C263; C353; C417]
FALSE	High	Master Protein	Q61112	Sdf4	45 kDa calcium-binding protein [OS=Mus musculus]	0	20.034	21	5	10	5	361	42	4.96	18.59			5			0	High	High	1	0		0		0
FALSE	High	Master Protein	Q61122	Nab1	NGFI-A-binding protein 1 [OS=Mus musculus]	0	18.801	8	3	4	2	486	54	6.61	4.79			3			0	High	High	1	0		0		0		Carbamidomethyl [C130; C135]
FALSE	High	Master Protein	Q61127	Nab2	NGFI-A-binding protein 2 [OS=Mus musculus]	0	50.021	27	13	25	12	525	56.5	6.86	52.05			13			0	High	High	1	0		0		0		Carbamidomethyl [C499]
FALSE	High	Master Protein	Q61140	Bcar1	Breast cancer anti-estrogen resistance protein 1 [OS=Mus musculus]	0	9.487	4	3	6	3	874	94.2	5.68	3.52			3			0	High	High	1	0		0		0		Carbamidomethyl [C824]
FALSE	High	Master Protein	Q61142	Spin1	Spindlin-1 [OS=Mus musculus]	0	13.421	10	2	5	2	262	29.6	6.96	14.37			2			0	High	High	1	0		0		0		Carbamidomethyl [C96]
FALSE	High	Master Protein	Q61147	Cp	Ceruloplasmin [OS=Mus musculus]	0	15.742	6	5	5	5	1061	121.1	5.85	4.82	2.66		4	1		0	High	High	1	0		1	Deamidated [Q601]	0		Carbamidomethyl [C356]; Deamidated [Q601]
FALSE	High	Master Protein	Q61151	Ppp2r5e	Serine/threonine-protein phosphatase 2A 56 kDa regulatory subunit epsilon isoform [OS=Mus musculus]	0	20.387	8	3	13	2	467	54.7	6.95	25.11			3			0	High	High	1	0		0		0		Carbamidomethyl [C351]
FALSE	High	Master Protein	Q61166	Mapre1	Microtubule-associated protein RP/EB family member 1 [OS=Mus musculus]	0	137.976	59	16	50	14	268	30	5.22	114.5	19.15		16	3		0	High	High	1	0		3	Deamidated [Q133; N188; Q229]	0		Deamidated [Q133; N188; Q229]; Met-loss+Acetyl [N-Term]; Carbamidomethyl [C228]
FALSE	High	Master Protein	Q61171	Prdx2	Peroxiredoxin-2 [OS=Mus musculus]	0	152.04	76	15	127	14	198	21.8	5.41	251.37	21.24	10.54	13	3	2	0	High	High	1	0		2	Deamidated [Q80; N120]	0		Carbamidomethyl [C70; C172]; Deamidated [Q80; N120]; Met-loss+Acetyl [N-Term]
FALSE	High	Master Protein	Q61179	Irf9	Interferon regulatory factor 9 [OS=Mus musculus]	0	15.719	12	4	5	4	399	44.6	6.54	9.72			4			0	High	Not Found	1	0		0		0		Carbamidomethyl [C323]
FALSE	High	Master Protein	Q61183	Papola	Poly(A) polymerase alpha [OS=Mus musculus]	0	27.937	13	8	16	8	739	82.3	7.34	13.61			8			0	High	High	1	0		0		0		Carbamidomethyl [C118]
FALSE	High	Master Protein	Q61187	Tsg101	tumor susceptibility gene 101 protein [OS=Mus musculus]	0	45.706	32	10	20	10	391	44.1	6.71	42.31			10			0	High	High	1	0		0		0		Met-loss+Acetyl [N-Term]
FALSE	High	Master Protein	Q61189	Clns1a	Methylosome subunit pICln [OS=Mus musculus]	0	27.715	27	4	15	4	236	26	4.12	28.23			4			0	High	High	1	0		0		0
FALSE	High	Master Protein	Q61191	Hcfc1	Host cell factor 1 [OS=Mus musculus]	0	128.53	16	27	75	27	2045	210.3	7.18	146.19			27			0	High	High	1	0		0		0		Carbamidomethyl [C352; C353; C1882; C1896; C1905]
FALSE	High	Master Protein	Q61205	Pafah1b3	Platelet-activating factor acetylhydrolase IB subunit gamma [OS=Mus musculus]	0	57.05	50	8	28	8	232	25.8	6.93	74.78			8			0	High	High	1	0		0		0		Met-loss+Acetyl [N-Term]
FALSE	High	Master Protein	Q61206	Pafah1b2	platelet-activating factor acetylhydrolase IB subunit beta [OS=Mus musculus]	0	83.647	39	7	23	7	229	25.6	5.92	62.82			7			0	High	High	1	0		0		0		Carbamidomethyl [C35; C206]; Met-loss+Acetyl [N-Term]
FALSE	High	Master Protein	Q61207	Psap	Prosaposin [OS=Mus musculus]	0	76.274	33	18	41	18	557	61.4	5.19	67.9		12.22	16		2	0	High	High	1	0		0		0		Carbamidomethyl [C25; C33; C48; C63; C66; C94; C106; C197; C200; C240; C348; C473; C515]
FALSE	High	Master Protein	Q61210	Arhgef1	Rho guanine nucleotide exchange factor 1 [OS=Mus musculus]	0	29.256	10	8	13	8	920	102.7	5.6	19.86			8			0	High	High	1	0		0		0		Carbamidomethyl [C536; C891]
FALSE	High	Master Protein	Q61216	Mre11	Double-strand break repair protein MRE11 [OS=Mus musculus]	0	13.37	6	4	7	4	706	80.2	6.01	10.6			4			0	High	High	1	0		0		0
FALSE	High	Master Protein	Q61235	Sntb2	Beta-2-syntrophin [OS=Mus musculus]	0	29.428	20	7	13	7	520	56.3	8.69	15.88			7			0	High	High	1	0		0		0		Carbamidomethyl [C354; C430]
FALSE	High	Master Protein	Q61245	Col11a1	Collagen alpha-1(XI) chain [OS=Mus musculus]	0	14.133	2	4	4	4	1804	180.9	5.21	2.61			4			0	High	Not Found	1	0		0		0		Carbamidomethyl [C181; C235; C242; C1755]
FALSE	High	Master Protein	Q61249	Igbp1	Immunoglobulin-binding protein 1 [OS=Mus musculus]	0	30.954	28	7	12	7	340	38.9	6.18	18.76			7			0	High	High	1	0		0		0
FALSE	High	Master Protein	Q61263	Soat1	sterol O-acyltransferase 1 [OS=Mus musculus]	0	57.268	21	9	23	9	540	63.8	9.01	39.61			9			0	High	High	1	0		0		0		Carbamidomethyl [C61; C82; C335]; Oxidation [M56]
FALSE	High	Master Protein	Q61316	Hspa4	Heat shock 70 kDa protein 4 [OS=Mus musculus]	0	598.382	67	55	324	49	841	94.1	5.24	659.48	2.84	5.48	53	1	2	0	High	High	1	0		1	Deamidated [N407]	0		Carbamidomethyl [C34; C38; C140; C167; C245; C310; C376; C380; C417; C780]; Oxidation [M106; M157; M309; M510; M522; M605; M607; M743; M746]; Deamidated [N407]
FALSE	High	Master Protein	Q61334	Bcap29	B-cell receptor-associated protein 29 [OS=Mus musculus]	0	13.421	13	2	4	2	240	27.9	9.72	7.71			2			0	High	High	1	0		0		0
FALSE	High	Master Protein	Q61335	Bcap31	B-cell receptor-associated protein 31 [OS=Mus musculus]	0	73.334	33	10	33	10	245	27.9	8.7	86.27	3.62		10	1		0	High	High	1	0		1	Deamidated [N85]	0		Deamidated [N85]
FALSE	High	Master Protein	Q61337	Bad	Bcl2-associated agonist of cell death [OS=Mus musculus]	0	9.748	18	2	4	2	204	22.1	9.17	4.71			2			0	Not Found	High	1	0		0		0
FALSE	High	Master Protein	Q61398	Pcolce	Procollagen C-endopeptidase enhancer 1 [OS=Mus musculus]	0	117.999	44	17	69	17	468	50.1	8.41	133.28		6.69	16		1	0	High	High	1	0		0		0		Carbamidomethyl [C89; C111; C158; C212; C341; C409]
FALSE	High	Master Protein	Q61411	Hras	GTPase HRas [OS=Mus musculus]	0	33.697	47	6	14	1	189	21.3	5.31	31.07			6			0	High	High	1	0		0		0		Carbamidomethyl [C80]
FALSE	High	Master Protein	Q61420	Slc35a1	CMP-sialic acid transporter [OS=Mus musculus]	0	14.413	7	2	5	2	336	36.4	8.73	13.64			2			0	High	High	1	0		0		0
FALSE	High	Master Protein	Q61425	Hadh	Hydroxyacyl-coenzyme A dehydrogenase, mitochondrial [OS=Mus musculus]	0	74.376	42	13	36	13	314	34.4	8.65	57.73			13			0	High	High	1	0		0		0		Oxidation [M177; M293]; Carbamidomethyl [C201; C211]
FALSE	High	Master Protein	Q61458	Ccnh	Cyclin-H [OS=Mus musculus]	0	17.436	15	4	6	4	323	37.5	7.11	8.71			4			0	High	Not Found	1	0		0		0		Carbamidomethyl [C280]
FALSE	High	Master Protein	Q61469	Plpp1	Phospholipid phosphatase 1 [OS=Mus musculus]	0	14.843	13	4	6	3	283	31.9	7.02	4.3			4			0	High	Not Found	1	0		0		0		Carbamidomethyl [C40]
FALSE	High	Master Protein	Q61490	Alcam	CD166 antigen [OS=Mus musculus]	0	14.767	7	4	7	4	583	65.1	6.15	8.54			4			0	High	High	1	0		0		0		Carbamidomethyl [C157]
FALSE	High	Master Protein	Q61508	Ecm1	Extracellular matrix protein 1 [OS=Mus musculus]	0	131.124	48	19	48	19	559	62.8	6.8	106.76	2.2		19	1		0	High	High	1	0		1	Deamidated [N516]	0		Carbamidomethyl [C251; C389; C402; C403; C414; C445; C492; C505; C506; C517]; Deamidated [N516]
FALSE	High	Master Protein	Q61510	Trim25	E3 ubiquitin/ISG15 ligase TRIM25 [OS=Mus musculus]	0	87.998	29	16	31	16	634	71.7	8.28	47.65			16			0	High	High	1	0		0		0		Carbamidomethyl [C185; C503; C511; C529; C534; C555]
FALSE	High	Master Protein	Q61543	Glg1	Golgi apparatus protein 1 [OS=Mus musculus]	0	203.525	37	39	97	39	1175	133.6	6.84	182.68			39			0	High	High	1	0		0		0		Carbamidomethyl [C114; C136; C151; C186; C199; C265; C287; C312; C320; C333; C381; C400; C415; C503; C511; C635; C655; C667; C692; C700; C716; C730; C899; C966; C980; C1067; C1088]
FALSE	High	Master Protein	Q61545	Ewsr1	RNA-binding protein EWS [OS=Mus musculus]	0	107.117	18	9	29	9	655	68.4	9.33	92.77	5.41	6.47	8	1	1	0	High	High	1	0		1	Deamidated [Q280]	0		Carbamidomethyl [C523; C528]; Oxidation [M275; M483]; Deamidated [Q280]
FALSE	High	Master Protein	Q61550	Rad21	Double-strand-break repair protein rad21 homolog [OS=Mus musculus]	0	14.882	6	3	4	3	635	72	4.64	7.13			3			0	High	High	1	0		0		0		Carbamidomethyl [C35]
FALSE	High	Master Protein	Q61553	Fscn1	Fascin [OS=Mus musculus]	0	311.07	68	37	279	37	493	54.5	6.89	507.9	12.48	28.53	31	2	6	0	High	High	1	0		2	Deamidated [Q258; Q362]	0		Carbamidomethyl [C61; C80; C89; C121; C260; C334; C341; C397]; Deamidated [Q258; Q362]
FALSE	High	Master Protein	Q61554	Fbn1	Fibrillin-1 [OS=Mus musculus]	0	65.011	6	14	21	14	2873	312.1	4.92	28.3			14			0	High	High	1	0		0		0		Carbamidomethyl [C67; C68; C209; C210; C572; C578; C598; C600; C672; C847; C855; C969; C1041; C1322; C1328; C1335; C1536; C1960; C2688]
FALSE	High	Master Protein	Q61559	Fcgrt	IgG receptor FcRn large subunit p51 [OS=Mus musculus]	0	5.703	4	2	2	2	365	40.1	5.29	2.56			2			0	High	High	1	0		0		0		Carbamidomethyl [C182]
FALSE	High	Master Protein	Q61576	Fkbp10	Peptidyl-prolyl cis-trans isomerase FKBP10 [OS=Mus musculus]	0	237.665	45	31	142	30	581	64.7	5.64	297.78	7.92	7.34	28	2	3	0	High	High	1	0		1	Deamidated [N464]	0		Carbamidomethyl [C109; C166; C221; C278; C446]; Oxidation [P35; M60; M106; M108; M169; M213; M220; M445; M537]; Deamidated [N464]
FALSE	High	Master Protein	Q61578	Fdxr	NADPH:adrenodoxin oxidoreductase, mitochondrial [OS=Mus musculus]	0	12.194	8	4	6	4	494	54.2	8.66	8.21			4			0	High	High	1	0		0		0
FALSE	High	Master Protein	Q61581	Igfbp7	Insulin-like growth factor-binding protein 7 [OS=Mus musculus]	0	81.348	56	12	24	12	281	29	8.31	58.55		7.43	11		1	0	High	High	1	0		0		0		Carbamidomethyl [C31; C34; C39; C47; C56; C58; C59; C62; C80; C86; C110; C112; C119; C130; C247]
FALSE	High	Master Protein	Q61584	Fxr1	Fragile X mental retardation syndrome-related protein 1 [OS=Mus musculus]	0	177.966	46	28	88	26	677	76.2	6.98	151.94			28			0	High	High	1	0		0		0		Carbamidomethyl [C77; C129]; Oxidation [M187]
FALSE	High	Master Protein	Q61592	Gas6	Growth arrest-specific protein 6 [OS=Mus musculus]	0	17.33	4	2	2	2	674	74.6	5.52	5.44			2			0	High	Not Found	1	0		0		0		Carbamidomethyl [C666]
FALSE	High	Master Protein	Q61595	Ktn1	Kinectin [OS=Mus musculus]	0	154.35	29	31	75	31	1327	152.5	5.86	132.84	3.09		30	1		0	High	High	1	0		0		1	Phospho [S75]	Carbamidomethyl [C988; C1081]; Phospho [S75]
FALSE	High	Master Protein	Q61598	Gdi2	Rab GDP dissociation inhibitor beta [OS=Mus musculus]	0	507.939	77	45	249	37	445	50.5	6.25	615.85	9.4	21.47	41	2	4	0	High	High	1	0		2	Deamidated [N36; N262]	0		Carbamidomethyl [C202; C203; C277; C282; C302; C317; C335; C414]; Oxidation [M33; M66; M82; M90; M250; M424; M434]; Deamidated [N36; N262]
FALSE	High	Master Protein	Q61599	Arhgdib	Rho GDP-dissociation inhibitor 2 [OS=Mus musculus]	0	249.633	77	15	52	15	200	22.8	5.11	175.55	4.52	16.01	14	1	1	0	High	High	1	0		1	Deamidated [Q9]	0		Oxidation [M37; M141]; Deamidated [Q9]; Carbamidomethyl [C75]; Met-loss+Acetyl [N-Term]
FALSE	High	Master Protein	Q61602	Gli3	Transcriptional activator GLI3 [OS=Mus musculus]	0	15.511	2	2	3	2	1583	171.5	7.23	7.09			2			0	High	High	1	0		0		0
FALSE	High	Master Protein	Q61644	Pacsin1	Protein kinase C and casein kinase substrate in neurons protein 1 [OS=Mus musculus]	0	4.31	4	2	7	1	441	50.5	5.24	4.03			2			0	High	High	1	0		0		0
FALSE	High	Master Protein	Q61655	Ddx19a	ATP-dependent RNA helicase DDX19A [OS=Mus musculus]	0	155.843	51	24	60	24	478	53.9	6.67	124.96	4.57		24	1		0	High	High	1	0		1	Deamidated [N74]	0		Oxidation [M441]; Carbamidomethyl [C164; C166; C313]; Deamidated [N74]
FALSE	High	Master Protein	Q61656	Ddx5	probable ATP-dependent RNA helicase DDX5 [OS=Mus musculus]	0	200.137	53	36	149	27	614	69.2	8.92	266.04	0		36	1		0	High	High	1	0		1	Deamidated [Q71]	0		Oxidation [M253; M256; M277; M369]; Carbamidomethyl [C89; C170; C191; C200; C221; C234]; Deamidated [Q71]
FALSE	High	Master Protein	Q61686	Cbx5	chromobox protein homolog 5 [OS=Mus musculus]	0	14.095	23	4	5	3	191	22.2	5.86	5.8			4			0	High	High	1	0		0		0		Carbamidomethyl [C160]
FALSE	High	Master Protein	Q61699	Hsph1	Heat shock protein 105 kDa [OS=Mus musculus]	0	478.084	60	50	273	45	858	96.3	5.53	480.52	18.29		49	3		0	High	High	1	0		3	Deamidated [N96; Q305; N842]	0		Carbamidomethyl [C34; C140; C167; C245; C290; C310; C376; C380; C517; C642; C651; C659; C797; C845]; Deamidated [N96; Q305; N842]; Oxidation [M277; M622; M624]
FALSE	High	Master Protein	Q61712	Dnajc1	DnaJ homolog subfamily C member 1 [OS=Mus musculus]	0	11.861	6	3	5	3	552	63.8	8.97	7.5			3			0	High	High	1	0		0		0
FALSE	High	Master Protein	Q61733	Mrps31	28S ribosomal protein S31, mitochondrial [OS=Mus musculus]	0	14.287	10	4	6	4	384	43.9	8.51	8.12			4			0	High	High	1	0		0		0
FALSE	High	Master Protein	Q61735	Cd47	Leukocyte surface antigen CD47 [OS=Mus musculus]	0	19.253	13	4	16	1	303	33.1	8.63	25.66			4			0	High	High	1	0		0		0		Oxidation [M54]
FALSE	High	Master Protein	Q61739	Itga6	integrin alpha-6 [OS=Mus musculus]	0	71.727	16	15	17	15	1091	122.1	7.03	31.34			15			0	High	High	1	0		0		0		Carbamidomethyl [C86; C154; C175; C188; C489; C496; C626; C632; C881]
FALSE	High	Master Protein	Q61749	Eif2b4	translation initiation factor eIF-2B subunit delta [OS=Mus musculus]	0	61.499	21	8	24	8	524	57.6	9.25	39.98			8			0	High	High	1	0		0		0		Carbamidomethyl [C130]
FALSE	High	Master Protein	Q61753	Phgdh	D-3-phosphoglycerate dehydrogenase [OS=Mus musculus]	0	261.075	51	31	187	31	533	56.5	6.54	434.15	2.12	22.33	29	1	3	0	High	High	1	0		1	Deamidated [N144]	0		Carbamidomethyl [C18; C19; C48; C254; C281; C295; C369]; Deamidated [N144]; Oxidation [M128; M139; M164; M169]; Met-loss+Acetyl [N-Term]
FALSE	High	Master Protein	Q61768	Kif5b	Kinesin-1 heavy chain [OS=Mus musculus]	0	227.483	40	35	83	30	963	109.5	6.44	195.03			35			0	High	High	1	0		0		0		Carbamidomethyl [C65; C174; C294; C301; C302; C632]
FALSE	High	Master Protein	Q61771	Kif3b	Kinesin-like protein KIF3B [OS=Mus musculus]	0	17.589	6	5	14	5	747	85.2	7.69	13.42			5			0	High	High	1	0		0		0
FALSE	High	Master Protein	Q61792	Lasp1	LIM and SH3 domain protein 1 [OS=Mus musculus]	0	139.841	65	19	233	19	263	30	7.05	233.53		9.28	18		1	0	High	High	1	1	Acetyl [N-Term]	0		0		Carbamidomethyl [C5; C20; C29; C32; C35; C53]; Oxidation [M64; M131]; Acetyl [N-Term]
FALSE	High	Master Protein	Q61823	Pdcd4	Programmed cell death protein 4 [OS=Mus musculus]	0	50.844	27	8	21	8	469	51.7	5.16	34.16			8			0	High	High	1	0		0		0		Carbamidomethyl [C275; C288; C350]
FALSE	High	Master Protein	Q61846	Melk	Maternal embryonic leucine zipper kinase [OS=Mus musculus]	0	12.558	8	4	4	4	643	72.7	8.72	2.23			4			0	High	High	1	0		0		0		Carbamidomethyl [C29]
FALSE	High	Master Protein	Q61879	Myh10	Myosin-10 [OS=Mus musculus]	0	986.677	52	128	411	92	1976	228.9	5.54	952.57	11.94	36.54	119	3	9	0	High	High	1	0		3	Deamidated [N97; N702; Q1749]	0		Oxidation [M90; M165; M372; M491; M593; M596]; Carbamidomethyl [C95; C164; C176; C382; C576; C701; C823; C1011; C1238]; Deamidated [N97; N702; Q1749]
FALSE	High	Master Protein	Q61881	Mcm7	DNA replication licensing factor MCM7 [OS=Mus musculus]	0	267.882	48	33	115	33	719	81.2	6.37	301.11			33			0	High	High	1	0		0		0		Carbamidomethyl [C378; C482]; Met-loss+Acetyl [N-Term]; Oxidation [M131]
FALSE	High	Master Protein	Q61937	Npm1	Nucleophosmin [OS=Mus musculus]	0	162.708	63	16	75	16	292	32.5	4.77	151.08	27.76		14	3		0	High	High	1	1	Acetyl [N-Term]	4	Deamidated [N66; Q114; Q208; N209]	1	Phospho [S125]	Carbamidomethyl [C21; C104]; Phospho [S125]; Deamidated [N66; Q114; Q208; N209]; Acetyl [N-Term]; Oxidation [M5; M7; M65; M81]
FALSE	High	Master Protein	Q61990	Pcbp2	Poly(rC)-binding protein 2 [OS=Mus musculus]	0	177.821	61	20	99	3	362	38.2	6.79	213.86	6.66	36.03	15	2	5	0	High	High	1	0		1	Deamidated [N89]	1	Phospho [S185]	Oxidation [M74; M137; M247; M254]; Carbamidomethyl [C54; C109; C158; C163]; Phospho [S185]; Deamidated [N89]
FALSE	High	Master Protein	Q62059	Vcan	Isoform V1 of Versican core protein [OS=Mus musculus]	0	38.038	4	8	20	8	2397	262.5	4.69	26.25			8			0	High	High	1	0		0		0		Carbamidomethyl [C217; C315; C345; C2298; C2354]
FALSE	High	Master Protein	Q62073	Map3k7	mitogen-activated protein kinase kinase kinase 7 [OS=Mus musculus]	0	15.697	5	2	4	2	579	64.2	6.67	5.87			2			0	High	High	1	0		0		0		Carbamidomethyl [C174; C180; C500]
FALSE	High	Master Protein	Q62074	Prkci	Protein kinase c iota type [OS=Mus musculus]	0	58.412	20	10	17	10	595	68.2	5.85	42.25			10			0	High	High	1	0		0		0		Carbamidomethyl [C16; C58; C137; C190; C399]
FALSE	High	Master Protein	Q62077	Plcg1	1-phosphatidylinositol 4,5-bisphosphate phosphodiesterase gamma-1 [OS=Mus musculus]	0	83.123	14	18	44	18	1302	149.6	5.8	80.54			18			0	High	High	1	0		0		0		Carbamidomethyl [C646; C881]
FALSE	High	Master Protein	Q62086	Pon2	Serum paraoxonase/arylesterase 2 [OS=Mus musculus]	0	25.476	21	6	9	6	354	39.6	5.83	16.36			6			0	High	High	1	0		0		0		Carbamidomethyl [C42]
FALSE	High	Master Protein	Q62087	Pon3	Serum paraoxonase/lactonase 3 [OS=Mus musculus]	0	47.374	26	7	24	7	354	39.3	5.74	40.72	3.47		6	1		0	High	High	1	0		1	Deamidated [N322]	0		Deamidated [N322]
FALSE	High	Master Protein	Q62093	Srsf2	serine/arginine-rich splicing factor 2 [OS=Mus musculus]	0	76.759	27	6	32	6	221	25.5	11.85	110.21			6			0	High	High	1	0		0		0		Oxidation [M13; M72; M75]; Met-loss+Acetyl [N-Term]
FALSE	High	Master Protein	Q62095	Ddx3y	atp-dependent rna helicase ddx3y [OS=Mus musculus]	0	168.225	41	26	133	3	658	73.4	7.53	244.36			26			0	High	High	1	0		0		0		Carbamidomethyl [C54; C63; C222; C297; C316; C340]; Oxidation [M220; M329; M330; M351; M354; M378]
FALSE	High	Master Protein	Q62130	Ptpn14	Tyrosine-protein phosphatase non-receptor type 14 [OS=Mus musculus]	0	12.489	4	3	3	1	1189	135	8.34	6.98			3			0	Not Found	High	1	0		0		0		Carbamidomethyl [C1052]
FALSE	High	Master Protein	Q62136	Ptpn21	Tyrosine-protein phosphatase non-receptor type 21 [OS=Mus musculus]	0	25.897	7	6	6	4	1176	133.4	7.68	7.03			6			0	High	High	1	0		0		0		Carbamidomethyl [C1040]
FALSE	High	Master Protein	Q62159	Rhoc	Rho-related GTP-binding protein RhoC [OS=Mus musculus]	0	90.255	42	13	84	2	193	22	6.58	157.3		12.48	10		3	0	High	High	1	0		0		0		Oxidation [M173]; Carbamidomethyl [C16; C20; C107; C159]
FALSE	High	Master Protein	Q62165	Dag1	Dystroglycan [OS=Mus musculus]	0	41.987	10	8	21	8	893	96.8	8.44	32.84			8			0	High	High	1	0		0		0
FALSE	High	Master Protein	Q62167	Ddx3x	ATP-dependent RNA helicase DDX3X [OS=Mus musculus]	0	242.087	55	35	181	12	662	73.1	7.18	367.1			35			0	High	High	1	0		0		0		Carbamidomethyl [C128; C223; C298; C317; C341; C468]; Oxidation [M221; M330; M331; M352; M355; M379; M574]
FALSE	High	Master Protein	Q62178	Sema4a	Semaphorin-4A [OS=Mus musculus]	0.004	2.991	3	2	3	1	760	83.4	7.72	3.61			2			0	High	Not Found	1	0		0		0		Oxidation [M1]
FALSE	High	Master Protein	Q62181	Sema3c	Semaphorin-3C [OS=Mus musculus]	0	16.979	6	4	7	3	751	85.2	8.65	6.41			4			0	High	High	1	0		0		0		Carbamidomethyl [C532; C539]
FALSE	High	Master Protein	Q62186	Ssr4	translocon-associated protein subunit delta [OS=Mus musculus]	0	48.466	31	5	33	5	172	18.9	5.78	84.73			5			0	High	High	1	0		0		0		Oxidation [M63]
FALSE	High	Master Protein	Q62188	Dpysl3	Dihydropyrimidinase-related protein 3 [OS=Mus musculus]	0	240.013	59	26	111	22	570	61.9	6.49	259.39	7.15	3.72	24	2	2	0	High	High	1	0		2	Deamidated [N272; N356]	0		Carbamidomethyl [C132; C133; C248; C448; C471]; Deamidated [N272; N356]; Oxidation [M83; M362; M375; M437; M453; M498]
FALSE	High	Master Protein	Q62189	Snrpa	U1 SMALL NUCLEAR RIBONUCLEOPROTEIN A [OS=Mus musculus]	0	9.723	14	4	13	2	287	31.8	9.8	12.32			4			0	High	High	1	0		0		0		Met-loss+Acetyl [N-Term]
FALSE	High	Master Protein	Q62193	Rpa2	Replication protein A 32 kDa subunit [OS=Mus musculus]	0	61.871	35	7	33	7	270	29.7	6.15	68.73			7			0	High	High	1	0		0		0		Carbamidomethyl [C219; C250]; Oxidation [M97; M237]
FALSE	High	Master Protein	Q62203	Sf3a2	splicing factor 3a subunit 2 [OS=Mus musculus]	0	16.01	14	5	6	5	475	49.9	9.54	7.97			5			0	High	High	1	1	Acetyl [N-Term]	0		0		Carbamidomethyl [C59]; Acetyl [N-Term]
FALSE	High	Master Protein	Q62219	Tgfb1i1	Transforming growth factor beta-1-induced transcript 1 protein [OS=Mus musculus]	0	87.429	41	14	27	14	461	50.1	6.73	60.09			14			0	High	High	1	0		0		0		Carbamidomethyl [C91; C192; C228; C231; C254; C257; C275; C278; C287; C290; C405; C408; C431; C434; C452; C455]
FALSE	High	Master Protein	Q62261	Sptbn1	Spectrin beta chain, non-erythrocytic 1 [OS=Mus musculus]	0	444.511	38	67	136	67	2363	274.1	5.58	300.18			67			0	High	High	1	0		0		0		Carbamidomethyl [C112; C604; C1900; C2226; C2261]
FALSE	High	Master Protein	Q62318	Trim28	Transcription intermediary factor 1-beta [OS=Mus musculus]	0	245.73	47	26	99	26	834	88.8	5.77	215.01	18.21		25	3		0	High	High	1	0		2	Deamidated [N102; Q447]	1	Phospho [S51]	Carbamidomethyl [C66; C69; C84; C89; C92; C118; C121; C125; C222; C225; C230; C233; C628]; Oxidation [M136; M304; M379; M390; D455; M796]; Deamidated [N102; Q447]; Phospho [S51]
FALSE	High	Master Protein	Q62348	Tsn	Translin [OS=Mus musculus]	0	49.387	35	8	22	8	228	26.2	6.44	34.45		7.26	7		1	0	High	High	1	0		0		0
FALSE	High	Master Protein	Q62351	Tfrc	Transferrin receptor protein 1 [OS=Mus musculus]	0	118.908	28	19	45	19	763	85.7	6.57	87.8			19			0	High	High	1	0		0		0		Oxidation [M52; M113]; Carbamidomethyl [C365]
FALSE	High	Master Protein	Q62356	Fstl1	Follistatin-related protein 1 [OS=Mus musculus]	0	153.31	56	17	52	17	306	34.5	5.85	144.45			17			0	High	High	1	0		0		0		Carbamidomethyl [C29; C34; C40; C50; C52; C56; C75; C96; C111; C219; C231; C248; C251; C253; C255; C260; C265]
FALSE	High	Master Protein	Q62371	Ddr2	Discoidin domain-containing receptor 2 [OS=Mus musculus]	0	20.685	9	7	14	7	854	96.4	5.49	16.2			7			0	High	High	1	0		0		0		Carbamidomethyl [C304; C675]
FALSE	High	Master Protein	Q62376	Snrnp70	U1 small nuclear ribonucleoprotein 70 kDa [OS=Mus musculus]	0	29.916	15	7	16	7	448	52	9.94	14.31			7			0	High	High	1	0		0		0
FALSE	High	Master Protein	Q62383	Supt6h	transcription elongation factor spt6 [OS=Mus musculus]	0	19.495	3	4	6	4	1726	199	4.93	9.95			4			0	High	High	1	0		0		0		Carbamidomethyl [C1169]
FALSE	High	Master Protein	Q62384	Zpr1	Zinc finger protein ZPR1 [OS=Mus musculus]	0	71.092	36	13	28	13	459	50.7	4.78	46.84	4.41		13	1		0	High	High	1	0		1	Deamidated [N377]	0		Deamidated [N377]
FALSE	High	Master Protein	Q62393	Tpd52	Isoform 3 of Tumor protein D52 [OS=Mus musculus]	0	42.291	44	6	13	6	199	21.6	5.03	25.13			6			0	High	High	1	1	Acetyl [N-Term]	0		0		Acetyl [N-Term]
FALSE	High	Master Protein	Q62417	Sorbs1	Sorbin and SH3 domain-containing protein 1 [OS=Mus musculus]	0	5.397	2	2	3	2	1290	143	8.25	2.25			2			0	High	High	1	0		0		0
FALSE	High	Master Protein	Q62418	Dbnl	Drebrin-like protein [OS=Mus musculus]	0	163.416	44	17	57	17	436	48.7	4.92	141.06	3.58	6.41	16	1	1	0	High	High	1	0		1	Deamidated [Q155]	0		Carbamidomethyl [C67; C97; C127]; Oxidation [M63; M276]; Deamidated [Q155]
FALSE	High	Master Protein	Q62419	Sh3gl1	Endophilin-A2 [OS=Mus musculus]	0	103.285	44	16	37	16	368	41.5	5.72	51.04			16			0	High	High	1	0		0		0		Carbamidomethyl [C96; C147; C311]
FALSE	High	Master Protein	Q62422	Ostf1	osteoclast-stimulating factor 1 [OS=Mus musculus]	0	32.964	34	6	23	6	215	23.8	5.68	39.54			6			0	High	High	1	0		0		0		Carbamidomethyl [C185]; Met-loss+Acetyl [N-Term]
FALSE	High	Master Protein	Q62425	Ndufa4	Cytochrome c oxidase subunit NDUFA4 [OS=Mus musculus]	0	14.452	48	5	10	5	82	9.3	9.52	11.79			5			0	High	High	1	0		0		0
FALSE	High	Master Protein	Q62426	Cstb	Cystatin-B [OS=Mus musculus]	0	72.012	94	7	34	7	98	11	7.39	66.51	3.16		7	1		0	High	High	1	1	Acetyl [N-Term]	0		0		Acetyl [N-Term]; Carbamidomethyl [C3; C64]; Oxidation [M2; M10]
FALSE	High	Master Protein	Q62432	Smad2	Mothers against decapentaplegic homolog 2 [OS=Mus musculus]	0	40.257	15	7	16	1	467	52.2	6.58	40.92			7			0	Not Found	High	1	0		0		0		Carbamidomethyl [C129; C161; C312; C374]
FALSE	High	Master Protein	Q62433	Ndrg1	Protein NDRG1 [OS=Mus musculus]	0	133.577	44	10	37	10	394	43	6.1	111.94	11.55		9	3		0	High	High	1	0		2	Deamidated [Q310; N377]	1	Phospho [T366]	Carbamidomethyl [C253; C272; C289]; Deamidated [Q310; N377]; Oxidation [M286; M312; M320]; Phospho [T366]
FALSE	High	Master Protein	Q62446	Fkbp3	peptidyl-prolyl cis-trans isomerase FKBP3 [OS=Mus musculus]	0	118.11	59	17	53	17	224	25.1	9.28	145.67	2.81		17	1		0	High	High	1	0		1	Deamidated [N148]	0		Carbamidomethyl [C133]; Deamidated [N148]; Met-loss+Acetyl [N-Term]
FALSE	High	Master Protein	Q62448	Eif4g2	Eukaryotic translation initiation factor 4 gamma 2 [OS=Mus musculus]	0	110.919	30	23	43	23	906	102	7.14	74.46			23			0	High	High	1	1	Acetyl [N-Term]	0		0		Carbamidomethyl [C282]; Acetyl [N-Term]
FALSE	High	Master Protein	Q62465	Vat1	Synaptic vesicle membrane protein VAT-1 homolog [OS=Mus musculus]	0	149.985	49	19	84	19	406	43.1	6.37	194.85		9.8	18		1	0	High	High	1	0		0		0		Carbamidomethyl [C63; C99; C337]; Oxidation [M107; M300; M314]
FALSE	High	Master Protein	Q62470	Itga3	Integrin alpha-3 [OS=Mus musculus]	0	107.092	19	18	39	18	1053	116.7	6.57	85.79			18			0	High	High	1	0		0		0		Carbamidomethyl [C94; C103; C616; C622; C906]
FALSE	High	Master Protein	Q62523	Zyx	Zyxin [OS=Mus musculus]	0	204.698	58	24	125	24	564	60.5	6.4	225.18	2.44	36.39	18	1	6	0	High	High	1	0		0		0		Carbamidomethyl [C376; C379; C404; C407; C425; C428; C436; C439; C496; C499; C526; C529; C532; C545; C554]; Oxidation [M504; M524]; Met-loss+Acetyl [N-Term]
FALSE	High	Master Protein	Q63810	Ppp3r1	Calcineurin subunit B type 1 [OS=Mus musculus]	0	6.986	13	2	3	2	170	19.3	4.81	6.06			2			0	High	High	1	0		0		0
FALSE	High	Master Protein	Q63829	Commd3	COMM domain-containing protein 3 [OS=Mus musculus]	0	21.217	30	5	11	5	195	22	5.59	17.92			5			0	High	High	1	0		0		0		Carbamidomethyl [C90; C101]
FALSE	High	Master Protein	Q63844	Mapk3	mitogen-activated protein kinase 3 [OS=Mus musculus]	0	138.53	53	20	74	14	380	43	6.61	161.22			20			0	High	High	1	0		0		0		Oxidation [M116; M217]; Carbamidomethyl [C83; C179; C184]; Met-loss+Acetyl [N-Term]
FALSE	High	Master Protein	Q63850	Nup62	nuclear pore glycoprotein p62 [OS=Mus musculus]	0	19.631	8	3	7	3	526	53.2	5.31	9.64			3			0	High	High	1	0		0		0
FALSE	High	Master Protein	Q63886	Ugt1a1	UDP-glucuronosyltransferase 1-1 [OS=Mus musculus]	0	26.433	15	6	27	1	535	60	8.62	40.39			6			0	Not Found	High	1	0		0		0		Carbamidomethyl [C385]; Oxidation [M322]
FALSE	High	Master Protein	Q63918	Cavin2	caveolae-associated protein 2 [OS=Mus musculus]	0	49.965	26	10	23	10	418	46.7	5.21	36.87			10			0	High	High	1	0		0		0
FALSE	High	Master Protein	Q63932	Map2k2	Dual specificity mitogen-activated protein kinase kinase 2 [OS=Mus musculus]	0	96.178	39	17	82	11	401	44.4	7.05	110.6		2.46	16		1	0	High	High	1	0		0		0		Carbamidomethyl [C385]
FALSE	High	Master Protein	Q64008	Rab34	Ras-related protein Rab-34 [OS=Mus musculus]	0	47.644	42	12	29	12	259	29.1	8.27	47.37			12			0	High	High	1	1	Acetyl [N-Term]	0		0		Carbamidomethyl [C19; C67; C73; C116]; Acetyl [N-Term]
FALSE	High	Master Protein	Q64010	Crk	Adapter molecule crk [OS=Mus musculus]	0	106.842	56	17	37	17	304	33.8	5.55	87.9			17			0	High	High	1	0		0		0		Carbamidomethyl [C279]; Met-loss+Acetyl [N-Term]
FALSE	High	Master Protein	Q64092	Tfe3	Transcription factor E3 [OS=Mus musculus]	0	7.404	10	3	6	3	572	61.5	5.59	1.74	2.45		2	1		0	High	High	1	0		1	Deamidated [Q170]	0		Deamidated [Q170]
FALSE	High	Master Protein	Q640N1	Aebp1	Adipocyte enhancer-binding protein 1 [OS=Mus musculus]	0	70.812	15	13	28	13	1128	128.3	5.08	61.89			13			0	High	High	1	0		0		0		Carbamidomethyl [C376]
FALSE	High	Master Protein	Q64105	Spr	Sepiapterin reductase [OS=Mus musculus]	0	110.14	54	12	44	12	261	27.9	5.74	119.33			12			0	High	High	1	0		0		0		Carbamidomethyl [C160; C235]
FALSE	High	Master Protein	Q64112	Ifit2	Interferon-induced protein with tetratricopeptide repeats 2 [OS=Mus musculus]	0	4.272	4	2	5	2	472	55	7.43	0			2			0	High	Not Found	1	0		0		0
FALSE	High	Master Protein	Q64131	Runx3	Runt-related transcription factor 3 [OS=Mus musculus]	0	9.064	6	2	2	2	409	43.5	9.5	2.74			2			0	High	High	1	0		0		0		Carbamidomethyl [C77]
FALSE	High	Master Protein	Q64133	Maoa	Amine oxidase [flavin-containing] A [OS=Mus musculus]	0	132.822	38	22	82	18	526	59.6	7.81	160.19	9.89	2.61	21	1	1	0	High	High	1	0		1	Deamidated [N212]	0		Carbamidomethyl [C165; C306; C374]; Oxidation [M307]; Deamidated [N212]
FALSE	High	Master Protein	Q64152	Btf3	Isoform 2 of Transcription factor BTF3 [OS=Mus musculus]	0	83.506	65	9	58	9	162	17.7	7.5	138.73	10.23		8	2		0	High	High	1	1	Acetyl [N-Term]	1	Deamidated [N152]	0		Deamidated [N152]; Oxidation [M64]; Acetyl [N-Term]
FALSE	High	Master Protein	Q64191	Aga	N(4)-(beta-N-acetylglucosaminyl)-L-asparaginase [OS=Mus musculus]	0	53.512	32	9	30	9	346	37	6.44	64.81			9			0	High	High	1	0		0		0		Carbamidomethyl [C163; C286]
FALSE	High	Master Protein	Q64213	Sf1	Splicing factor 1 [OS=Mus musculus]	0	111.51	22	13	46	13	653	70.4	8.98	123.08			13			0	High	High	1	0		0		0		Met-loss+Acetyl [N-Term]; Carbamidomethyl [C279]
FALSE	High	Master Protein	Q64253	Ly6e	Lymphocyte antigen 6E [OS=Mus musculus]	0	10.818	18	2	6	2	130	13.8	7.05	8.64		10.57	1		1	0	High	High	1	0		0		0		Carbamidomethyl [C23; C26; C35; C41]
FALSE	High	Master Protein	Q64261	Cdk6	Cyclin-dependent kinase 6 [OS=Mus musculus]	0	35.387	29	7	17	6	326	37	6.62	38.51			7			0	High	High	1	0		0		0		Carbamidomethyl [C83]
FALSE	High	Master Protein	Q64282	Ifit1	interferon-induced protein with tetratricopeptide repeats 1 [OS=Mus musculus]	0	153.027	51	22	41	22	463	53.7	7.52	82.58			22			0	High	Not Found	1	0		0		0		Carbamidomethyl [C19; C98; C160; C420]; Oxidation [M54]
FALSE	High	Master Protein	Q64310	Surf4	surfeit locus protein 4 [OS=Mus musculus]	0	29.001	20	5	45	5	269	30.4	7.78	45.51			5			0	High	High	1	0		0		0		Oxidation [M7; M44; M141; M148]; Met-loss [N-Term]
FALSE	High	Master Protein	Q64311	Ntan1	Protein N-terminal asparagine amidohydrolase [OS=Mus musculus]	0	15.048	19	5	11	5	310	34.6	6.19	17.99	3.34		4	1		0	High	High	1	0		1	Deamidated [Q39]	0		Deamidated [Q39]; Met-loss [N-Term]
FALSE	High	Master Protein	Q64314	Cd34	Hematopoietic progenitor cell antigen CD34 [OS=Mus musculus]	0	44.258	25	8	38	8	382	41	5.3	51.32	6.84		8	2		0	High	High	1	0		1	Deamidated [N330]	0		Carbamidomethyl [C187; C196; C212]; Deamidated [N330]
FALSE	High	Master Protein	Q64324	Stxbp2	Syntaxin-binding protein 2 [OS=Mus musculus]	0	6.103	4	2	2	2	593	66.3	6.74	0			2			0	High	High	1	0		0		0
FALSE	High	Master Protein	Q64331	Myo6	Unconventional myosin-VI [OS=Mus musculus]	0	26.671	5	6	9	6	1265	146.3	8.85	11.27			6			0	High	High	1	0		0		0		Carbamidomethyl [C1010]
FALSE	High	Master Protein	Q64337	Sqstm1	sequestosome-1 [OS=Mus musculus]	0	90.231	47	12	23	12	442	48.1	5.21	55.6		5.03	11		1	0	High	High	1	0		0		0		Carbamidomethyl [C26; C44; C113; C128; C131; C142; C145; C151; C154; C219; C333]
FALSE	High	Master Protein	Q64339	Isg15	Ubiquitin-like protein ISG15 [OS=Mus musculus]	0	97.659	59	7	24	7	161	17.9	7.9	69.84		6.32	5		2	0	High	High	1	0		0		0		Carbamidomethyl [C76; C144]; Oxidation [M9; M23]
FALSE	High	Master Protein	Q64345	Ifit3	Interferon-induced protein with tetratricopeptide repeats 3 [OS=Mus musculus]	0	43.545	22	8	10	8	403	47.2	5.64	21.08			8			0	High	Not Found	1	0		0		0		Carbamidomethyl [C18; C39; C73; C366]
FALSE	High	Master Protein	Q64373	Bcl2l1	bcl-2-like protein 1 [OS=Mus musculus]	0	4.654	14	2	3	2	233	26.1	4.94	0	2.17		1	1		0	High	High	1	0		1	Deamidated [N33]	0		Deamidated [N33]
FALSE	High	Master Protein	Q64378	Fkbp5	Peptidyl-prolyl cis-trans isomerase FKBP5 [OS=Mus musculus]	0	75.587	38	17	38	17	456	50.9	7.8	60.5			17			0	High	High	1	0		0		0		Carbamidomethyl [C103; C107; C215; C394]
FALSE	High	Master Protein	Q64430	Atp7a	copper-transporting ATPase 1 [OS=Mus musculus]	0	19.337	3	4	6	4	1491	161.9	6.62	12.21			4			0	High	High	1	0		0		0
FALSE	High	Master Protein	Q64433	Hspe1	10 kDa heat shock protein, mitochondrial [OS=Mus musculus]	0	85.162	87	15	90	15	102	11	8.35	167.8			15			0	High	High	1	0		0		0		Oxidation [M32]; Met-loss+Acetyl [N-Term]
FALSE	High	Master Protein	Q64435	Ugt1a6	UDP-glucuronosyltransferase 1-6 [OS=Mus musculus]	0	59.699	31	12	47	7	531	60.4	8.62	77.03			12			0	High	High	1	0		0		0		Carbamidomethyl [C381]; Oxidation [M318]
FALSE	High	Master Protein	Q64437	Adh7	Alcohol dehydrogenase class 4 mu/sigma chain [OS=Mus musculus]	0	31.252	14	7	18	5	374	39.9	7.85	30.04			7			0	High	High	1	0		0		0		Carbamidomethyl [C47; C98; C101; C104; C112; C317]
FALSE	High	Master Protein	Q64442	Sord	Sorbitol dehydrogenase [OS=Mus musculus]	0	52.874	28	9	28	9	357	38.2	7.02	42.44			9			0	High	High	1	0		0		0		Carbamidomethyl [C45; C140]; Oxidation [M66]; Met-loss+Acetyl [N-Term]
FALSE	High	Master Protein	Q64449	Mrc2	C-type mannose receptor 2 [OS=Mus musculus]	0	228.482	27	32	95	32	1479	167	5.99	183.55		19.68	30		2	0	High	High	1	0		0		0		Carbamidomethyl [C167; C186; C200; C212; C227; C334; C350; C358; C381; C392; C480; C548; C703; C941; C949; C1097; C1106; C1152; C1242; C1259]
FALSE	High	Master Protein	Q64471	Gstt1	Glutathione S-transferase theta-1 [OS=Mus musculus]	0	69.709	34	10	38	10	240	27.4	7.27	65.7			10			0	High	High	1	0		0		0		Carbamidomethyl [C220]
FALSE	High	Master Protein	Q64475	H2bc3	Histone H2B type 1-B [OS=Mus musculus]	0	26.225	41	6	38	6	126	13.9	10.32	28.35			6			0	High	High	1	0		0		0		Oxidation [M60; M63]
FALSE	High	Master Protein	Q64487	Ptprd	Isoform C of Receptor-type tyrosine-protein phosphatase delta [OS=Mus musculus]	0	12.085	2	3	4	1	1893	212	6.68	10.17			3			0	Not Found	High	1	0		0		0
FALSE	High	Master Protein	Q64514	Tpp2	Tripeptidyl-peptidase 2 [OS=Mus musculus]	0	325.536	46	51	154	1	1262	139.8	6.58	317.61	12.56		50	2		0	High	Not Found	1	0		2	Deamidated [Q55; N215]	0		Carbamidomethyl [C28; C150; C197; C209; C322; C342; C614; C710; C733; C787; C967; C1138; C1231]; Deamidated [Q55; N215]; Met-loss+Acetyl [N-Term]
FALSE	High	Master Protein	Q64516	Gk	Isoform 1 of Glycerol kinase [OS=Mus musculus]	0	21.579	14	7	10	7	524	57.4	5.64	9.65			7			0	High	High	1	0		0		0		Carbamidomethyl [C283; C287; C293]
FALSE	High	Master Protein	Q64521	Gpd2	Glycerol-3-phosphate dehydrogenase, mitochondrial [OS=Mus musculus]	0	159.852	43	28	76	28	727	80.9	6.61	161.24		3.41	27		1	0	High	High	1	0		0		0		Oxidation [M62; M127]; Carbamidomethyl [C188; C270; C285; C309; C546]
FALSE	High	Master Protein	Q64669	Nqo1	NAD(P)H dehydrogenase [quinone] 1 [OS=Mus musculus]	0	93.986	43	17	62	17	274	30.9	8.72	131.73		5.26	15		2	0	High	High	1	0		0		0		Carbamidomethyl [C180]; Oxidation [M22; M202]
FALSE	High	Master Protein	Q64674	Srm	spermidine synthase [OS=Mus musculus]	0	202.493	67	19	87	19	302	34	5.5	182.58	6.44		19	2		0	High	High	1	1	Acetyl [N-Term]	1	Deamidated [Q265]	0		Carbamidomethyl [C71; C89; C123; C204; C205; C209]; Deamidated [Q265]; Oxidation [P3; M140; M160; M274]; Acetyl [N-Term]
FALSE	High	Master Protein	Q64727	Vcl	Vinculin [OS=Mus musculus]	0	574.385	65	69	264	69	1066	116.6	6	641.06	15.87		69	2		0	High	High	1	0		1	Deamidated [N399]	0		Oxidation [M190; M195; M237; M327; M331; M533; M698; M709; M899; M900; M926; M933]; Carbamidomethyl [C313; C422; C545; C950; C985]; Deamidated [N399]
FALSE	High	Master Protein	Q64735	Cr1l	Complement component receptor 1-like protein [OS=Mus musculus]	0	7.151	4	2	4	2	483	53.7	6.65	3.17			2			0	High	High	1	0		0		0		Carbamidomethyl [C128]
FALSE	High	Master Protein	Q64737	Gart	trifunctional purine biosynthetic protein adenosine-3 [OS=Mus musculus]	0	341.276	49	38	119	38	1010	107.4	6.68	322.25			38			0	High	High	1	0		0		0		Carbamidomethyl [C41; C62; C93; C134; C237; C291; C298; C466; C646; C733; C769]; Oxidation [M233; M911]
FALSE	High	Master Protein	Q65Z40	Wapl	Wings apart-like protein homolog [OS=Mus musculus]	0	90.82	17	15	28	15	1200	134	5.41	63.92			15			0	High	High	1	0		0		0		Carbamidomethyl [C119; C684; C694; C916; C1200]
FALSE	High	Master Protein	Q66JT1	Lrrc8e	volume-regulated anion channel subunit LRRC8E [OS=Mus musculus]	0	17.281	5	4	6	3	795	90.4	7.03	12.04			4			0	High	High	1	0		0		0		Carbamidomethyl [C156]
FALSE	High	Master Protein	Q66JX5	Cep43	FGFR1 oncogene partner [OS=Mus musculus]	0	18.973	11	2	3	2	399	42.7	4.81	7.81			2			0	High	High	1	0		0		0
FALSE	High	Master Protein	Q689Z5	Sbno1	protein strawberry notch homolog 1 [OS=Mus musculus]	0	56.144	12	14	24	14	1390	153.6	8.07	39.57			14			0	High	High	1	0		0		0
FALSE	High	Master Protein	Q68FD5	Cltc	Clathrin heavy chain 1 [OS=Mus musculus]	0	673.122	48	78	319	78	1675	191.4	5.69	796.04		10.24	76		2	0	High	High	1	0		0		0		Oxidation [M73; M95; M104; M181; M1041]; Carbamidomethyl [C151; C292; C436; C459; C491; C753; C778; C870; C909; C918; C1102; C1257; C1260; C1528]; Met-loss+Acetyl [N-Term]
FALSE	High	Master Protein	Q68FE6	Ripor1	RHO family-interacting cell polarization regulator 1 [OS=Mus musculus]	0	19.924	5	5	8	5	1223	132.3	5.88	13.67			5			0	High	High	1	0		0		0		Carbamidomethyl [C147; C925; C945; C1191]
FALSE	High	Master Protein	Q68FF6	Git1	ARF GTPase-activating protein GIT1 [OS=Mus musculus]	0	34.73	13	8	12	7	770	85.2	6.93	17.7	2.78		7	1		0	High	High	1	0		1	Deamidated [Q587]	0		Carbamidomethyl [C31; C34; C35; C585]; Deamidated [Q587]
FALSE	High	Master Protein	Q68FH4	Galk2	N-acetylgalactosamine kinase [OS=Mus musculus]	0	52.735	24	9	22	9	458	50.5	6.9	40.12	5.13		9	1		0	High	High	1	0		1	Deamidated [N83]	0		Carbamidomethyl [C99; C113; C175]; Deamidated [N83]
FALSE	High	Master Protein	Q68FL4	Ahcyl2	Putative adenosylhomocysteinase 3 [OS=Mus musculus]	0	103.292	23	17	74	1	613	66.9	7.36	143.85			17			0	High	High	1	0		0		0		Carbamidomethyl [C294; C355; C375; C376; C400; C475; C478]; Oxidation [M359]
FALSE	High	Master Protein	Q68FL6	Mars1	Methionine--tRNA ligase, cytoplasmic [OS=Mus musculus]	0	266.867	47	38	123	38	902	101.4	7.14	263.19	0	23.01	35	1	3	0	High	High	1	0		1	Deamidated [Q419]	0		Carbamidomethyl [C66; C407; C410; C420; C568; C670; C789]; Deamidated [Q419]; Oxidation [M554]
FALSE	High	Master Protein	Q69Z37	Samd9l	sterile alpha motif domain-containing protein 9-like [OS=Mus musculus]	0	195.357	29	38	60	38	1561	180.1	6.99	115.69			38			0	High	Not Found	1	0		0		0		Carbamidomethyl [C492; C500; C629]
FALSE	High	Master Protein	Q69ZC8	Gpalpp1	GPALPP motifs-containing protein 1 [OS=Mus musculus]	0	19.009	12	4	9	4	346	38.9	5.41	13.44			4			0	High	High	1	0		0		0
FALSE	High	Master Protein	Q69ZN7	Myof	Myoferlin [OS=Mus musculus]	0	780.319	53	107	385	105	2048	233.2	6.16	831.64	4.65	23.35	103	2	4	0	High	High	1	0		1	Deamidated [N944]	0		Carbamidomethyl [C212; C275; C409; C435; C597; C1118; C1219; C1320; C1379; C1389; C1412; C1540; C1597; C1640; C1647; C1906; C1939; C2000]; Oxidation [M277; M296; M1067]; Deamidated [N944]
FALSE	High	Master Protein	Q69ZR2	Hectd1	E3 ubiquitin-protein ligase hectd1 [OS=Mus musculus]	0	112.75	12	28	47	28	2618	289.9	5.41	75.37			28			0	High	High	1	0		0		0		Carbamidomethyl [C44; C48; C131; C209; C254; C879; C1860; C2280; C2536; C2587]
FALSE	High	Master Protein	Q69ZS7	Hbs1l	HBS1-like protein [OS=Mus musculus]	0	42.455	15	9	14	9	682	75.1	6.46	24.93			9			0	High	High	1	0		0		0		Carbamidomethyl [C80; C489; C564; C567]
FALSE	High	Master Protein	Q69ZX6	Morc2a	MORC family CW-type zinc finger protein 2A [OS=Mus musculus]	0	12.476	4	4	5	4	1030	117.3	8.34	2.31			4			0	High	High	1	0		0		0		Carbamidomethyl [C127; C269; C270]
FALSE	High	Master Protein	Q6A009	Ltn1	E3 ubiquitin-protein ligase listerin [OS=Mus musculus]	0	12.405	2	5	7	5	1767	198.8	6.55	9.58			5			0	High	High	1	0		0		0		Carbamidomethyl [C980]
FALSE	High	Master Protein	Q6A026	Pds5a	Sister chromatid cohesion protein PDS5 homolog A [OS=Mus musculus]	0	83.285	16	17	36	15	1332	150.2	7.85	50.19		2.04	16		1	0	High	High	1	0		0		0		Carbamidomethyl [C1092; C1115]
FALSE	High	Master Protein	Q6A028	Swap70	Switch-associated protein 70 [OS=Mus musculus]	0	41.659	21	11	17	11	585	69	6.05	28.37			11			0	High	High	1	0		0		0		Carbamidomethyl [C40; C273]
FALSE	High	Master Protein	Q6A037	N4bp1	NEDD4-binding protein 1 [OS=Mus musculus]	0	16.673	5	3	5	3	893	99.1	5.74	8.3			3			0	High	Not Found	1	0		0		0
FALSE	High	Master Protein	Q6A065	Cep170	Centrosomal protein of 170 kDa [OS=Mus musculus]	0	110.043	17	20	41	20	1588	174.9	7.17	60.92			20			0	High	High	1	0		0		0		Carbamidomethyl [C234; C625; C768]
FALSE	High	Master Protein	Q6A068	Cdc5l	Cell division cycle 5-like protein [OS=Mus musculus]	0	4.809	3	2	3	2	802	92.1	8.02	0			2			0	High	High	1	0		0		0		Carbamidomethyl [C96]
FALSE	High	Master Protein	Q6A0A2	Larp4b	la-related protein 4B [OS=Mus musculus]	0	30.79	12	7	18	7	741	81.6	7.49	30.3			7			0	High	High	1	0		0		0		Carbamidomethyl [C635]
FALSE	High	Master Protein	Q6A0A9	FAM120A	Constitutive coactivator of PPAR-gamma-like protein 1 [OS=Mus musculus]	0	258.937	46	36	90	35	1112	121.6	8.92	208.69	5.23	14.85	34	1	2	0	High	High	1	0		1	Deamidated [N1046]	0		Carbamidomethyl [C14; C53; C174; C529; C667; C692; C823; C890; C917; C1082; C1097]; Met-loss [N-Term]; Deamidated [N1046]
FALSE	High	Master Protein	Q6A4J8	Usp7	Ubiquitin carboxyl-terminal hydrolase 7 [OS=Mus musculus]	0	83.472	20	19	36	19	1103	128.4	5.5	52.6		6.24	18		1	0	High	High	1	0		0		0		Carbamidomethyl [C91; C316; C335; C489; C703; C712; C722; C962]; Oxidation [M101]
FALSE	High	Master Protein	Q6DFW4	Nop58	Nucleolar protein 58 [OS=Mus musculus]	0	33.556	14	6	10	6	536	60.3	8.34	22.42			6			0	High	High	1	0		0		0		Carbamidomethyl [C205; C439]
FALSE	High	Master Protein	Q6DIC0	Smarca2	Probable global transcription activator SNF2L2 [OS=Mus musculus]	0	15.323	2	3	5	3	1577	180.1	7.2	10.15			3			0	High	High	1	0		0		0
FALSE	High	Master Protein	Q6DID3	Scaf8	Protein SCAF8 [OS=Mus musculus]	0	53.519	9	10	26	10	1268	139.5	8.24	29.5			10			0	High	High	1	0		0		0		Carbamidomethyl [C514; C518; C1167]
FALSE	High	Master Protein	Q6DID7	Wls	Protein wntless homolog [OS=Mus musculus]	0	58.415	19	14	41	14	541	62.1	7.65	43.35			14			0	High	High	1	0		0		0		Carbamidomethyl [C71; C162; C179]
FALSE	High	Master Protein	Q6EDY6	Carmil1	F-actin-uncapping protein LRRC16A [OS=Mus musculus]	0	30.849	5	5	7	5	1374	151.8	7.8	17.55			5			0	High	High	1	0		0		0
FALSE	High	Master Protein	Q6GQT1	A2m	Alpha-2-macroglobulin-P [OS=Mus musculus]	0	5.989	1	2	5	2	1474	164.2	6.61	6.08			2			0	High	High	1	0		0		0
FALSE	High	Master Protein	Q6GQT9	Nomo1	Nodal modulator 1 [OS=Mus musculus]	0	174.75	29	27	75	27	1214	133.3	6.09	177.42		3.44	26		1	0	High	High	1	0		0		0		Oxidation [M1202]; Carbamidomethyl [C31; C108; C557; C619; C955; C980; C1004]
FALSE	High	Master Protein	Q6GV12	Kdsr	3-ketodihydrosphingosine reductase [OS=Mus musculus]	0	18.299	11	3	5	3	332	35.9	7.9	12.57			3			0	High	High	1	0		0		0		Carbamidomethyl [C47; C52; C245]
FALSE	High	Master Protein	Q6IRU2	Tpm4	Tropomyosin alpha-4 chain [OS=Mus musculus]	0	145.152	68	21	48	20	248	28.5	4.68	112.92	4.05		21	1		0	High	High	1	0		1	Deamidated [Q15]	0		Carbamidomethyl [C154]; Deamidated [Q15]; Met-loss+Acetyl [N-Term]; Oxidation [M110]
FALSE	High	Master Protein	Q6IRU5	Cltb	Isoform 2 of Clathrin light chain B [OS=Mus musculus]	0	34.796	23	7	18	7	211	23.2	4.68	27.62			7			0	High	High	1	0		0		0		Carbamidomethyl [C181]
FALSE	High	Master Protein	Q6NSQ7	Ltv1	protein LTV1 homolog [OS=Mus musculus]	0	43.979	16	9	23	9	470	54	4.92	45.61			9			0	High	High	1	0		0		0
FALSE	High	Master Protein	Q6NSR8	Npepl1	Probable aminopeptidase NPEPL1 [OS=Mus musculus]	0	52.392	20	9	22	9	524	55.9	6.84	56.12			9			0	High	High	1	0		0		0		Carbamidomethyl [C284; C357; C397]
FALSE	High	Master Protein	Q6NSU3	Glt8d1	Glycosyltransferase 8 domain-containing protein 1 [OS=Mus musculus]	0	38.303	27	8	16	8	371	42	9.41	21.41			8			0	High	High	1	0		0		0
FALSE	High	Master Protein	Q6NV83	U2surp	U2 snRNP-associated SURP motif-containing protein [OS=Mus musculus]	0	10.461	4	4	5	4	1029	118.2	8.47	5.2			4			0	High	High	1	0		0		0
FALSE	High	Master Protein	Q6NVE8	Wdr44	WD repeat-containing protein 44 [OS=Mus musculus]	0	9.932	3	3	3	3	915	101.5	5.24	2.29			3			0	High	High	1	0		0		0		Carbamidomethyl [C718]
FALSE	High	Master Protein	Q6NVF0	Ocrl	Inositol polyphosphate 5-phosphatase OCRL-1 [OS=Mus musculus]	0	7.608	2	2	3	2	900	104.2	6.27	2.57			2			0	High	High	1	0		0		0		Carbamidomethyl [C497]
FALSE	High	Master Protein	Q6NVF4	Helb	DNA helicase B [OS=Mus musculus]	0	25.745	9	10	18	10	1074	121.4	5.82	14.75			10			0	High	High	1	0		0		0		Carbamidomethyl [C122; C588; C714]
FALSE	High	Master Protein	Q6NVF9	Cpsf6	Cleavage and polyadenylation specificity factor subunit 6 [OS=Mus musculus]	0	78.912	20	11	34	11	551	59.1	7.15	62.45			11			0	High	High	1	0		0		0		Carbamidomethyl [C159; C476]; Oxidation [M169]
FALSE	High	Master Protein	Q6NWW9	Fndc3b	Fibronectin type III domain-containing protein 3B [OS=Mus musculus]	0	81.424	16	16	41	16	1207	132.7	6.29	92.34			16			0	High	High	1	0		0		0		Carbamidomethyl [C218; C431; C536; C651; C652; C661; C677; C773; C837; C838; C969]
FALSE	High	Master Protein	Q6NXJ0	Wwc2	Protein WWC2 [OS=Mus musculus]	0	26.911	8	6	8	6	1187	132.5	5.71	13.8			6			0	High	High	1	0		0		0		Carbamidomethyl [C523]
FALSE	High	Master Protein	Q6NXM2	Rcbtb1	RCC1 and BTB domain-containing protein 1 [OS=Mus musculus]	0	20.229	8	3	5	2	531	58.3	6.43	11.56			3			0	High	High	1	0		0		0		Carbamidomethyl [C292; C313]
FALSE	High	Master Protein	Q6NZB0	Dnajc8	DnaJ homolog subfamily C member 8 [OS=Mus musculus]	0	21.095	26	5	10	5	253	29.8	9.06	18.65			5			0	High	High	1	0		0		0
FALSE	High	Master Protein	Q6NZC7	Sec23ip	SEC23-interacting protein [OS=Mus musculus]	0	111.499	25	24	46	24	998	110.7	5.94	80.5	2.76	8.37	22	1	1	0	High	High	1	0		0		1	Phospho [S748]	Carbamidomethyl [C272; C339]; Phospho [S748]; Oxidation [M989]
FALSE	High	Master Protein	Q6NZJ6	Eif4g1	eukaryotic translation initiation factor 4 gamma 1 [OS=Mus musculus]	0	360.868	36	50	173	50	1600	176	5.4	366.83	16.07	7.2	49	2	1	0	High	High	1	0		4	Deamidated [Q217; Q225; N227; N1123]	0		Oxidation [M959; M966; M1259]; Carbamidomethyl [C666; C823; C923; C938; C940]; Deamidated [Q217; Q225; N227; N1123]
FALSE	High	Master Protein	Q6NZM9	Hdac4	Histone deacetylase 4 [OS=Mus musculus]	0.002	3.309	1	2	2	1	1076	118.5	6.92	1.96			2			0	Not Found	High	1	0		0		0
FALSE	High	Master Protein	Q6NZN0	Rbm26	RNA-binding protein 26 [OS=Mus musculus]	0	79.64	17	14	29	12	1012	114.1	9.16	62.34	4.18		14	1		0	High	High	1	0		1	Deamidated [Q659]	0		Deamidated [Q659]; Carbamidomethyl [C25]; Oxidation [M815]
FALSE	High	Master Protein	Q6P069	Sri	Sorcin [OS=Mus musculus]	0	64.5	56	11	37	11	198	21.6	5.59	69.22			11			0	High	High	1	0		0		0		Carbamidomethyl [C57; C75; C162; C163]; Oxidation [M86; M90]
FALSE	High	Master Protein	Q6P1B1	Xpnpep1	xaa-Pro aminopeptidase 1 [OS=Mus musculus]	0	126.115	42	21	60	21	623	69.5	5.54	135.12			21			0	High	High	1	0		0		0		Carbamidomethyl [C46; C48; C279]; Oxidation [M86; M431]
FALSE	High	Master Protein	Q6P1E1	Zmiz1	Zinc finger MIZ domain-containing protein 1 [OS=Mus musculus]	0	8.921	2	3	6	3	1072	115.8	7.44	7.67			3			0	High	High	1	0		0		0		Carbamidomethyl [C712; C749]
FALSE	High	Master Protein	Q6P1F6	Ppp2r2a	Serine/threonine-protein phosphatase 2A 55 kDa regulatory subunit B alpha isoform [OS=Mus musculus]	0	136.342	42	20	76	14	447	51.7	6.2	177.96			20			0	High	High	1	0		0		0		Carbamidomethyl [C13]; Met-loss+Acetyl [N-Term]; Oxidation [M160; M163]
FALSE	High	Master Protein	Q6P1G0	Heatr6	HEAT repeat-containing protein 6 [OS=Mus musculus]	0	40.578	10	10	14	10	1184	128.8	7.24	23.03			10			0	High	High	1	0		0		0		Carbamidomethyl [C429; C723; C725]
FALSE	High	Master Protein	Q6P1H6	Ankle2	ankyrin repeat and LEM domain-containing protein 2 [OS=Mus musculus]	0	27.542	12	8	10	8	964	106.1	7.37	14.02			8			0	High	High	1	0		0		0		Carbamidomethyl [C428; C462; C516; C911; C915]
FALSE	High	Master Protein	Q6P2B1	Tnpo3	transportin-3 [OS=Mus musculus]	0	122.451	22	16	51	16	923	104.1	5.57	91.05	14.2		16	1		0	High	High	1	0		1	Deamidated [N628]	0		Carbamidomethyl [C60; C312; C380; C511; C527; C530; C634; C912]; Deamidated [N628]
FALSE	High	Master Protein	Q6P2K6	Ppp4r3a	Serine/threonine-protein phosphatase 4 regulatory subunit 3A [OS=Mus musculus]	0	30.056	9	7	13	3	820	93.8	4.89	28.74			7			0	High	High	1	0		0		0		Carbamidomethyl [C90; C339]
FALSE	High	Master Protein	Q6P4S6	Sik3	Serine/threonine-protein kinase SIK3 [OS=Mus musculus]	0	22.027	4	5	7	5	1311	145.7	6.92	9.2			5			0	High	High	1	0		0		0		Carbamidomethyl [C232; C254]
FALSE	High	Master Protein	Q6P4T2	Snrnp200	U5 small nuclear ribonucleoprotein 200 kDa helicase [OS=Mus musculus]	0	62.383	9	20	32	20	2136	244.4	6.06	36.84			20			0	High	High	1	0		0		0		Carbamidomethyl [C516; C1580]
FALSE	High	Master Protein	Q6P542	Abcf1	ATP-binding cassette sub-family F member 1 [OS=Mus musculus]	0	290.715	50	39	102	39	837	94.9	6.51	218.27	18.58	2.83	35	4	1	0	High	High	1	0		1	Deamidated [N330]	2	Phospho [S107; S225]	Phospho [S107; S225]; Carbamidomethyl [C647; C733; C750]; Oxidation [M289]; Deamidated [N330]
FALSE	High	Master Protein	Q6P549	Inppl1	Phosphatidylinositol 3,4,5-trisphosphate 5-phosphatase 2 [OS=Mus musculus]	0	55.472	13	15	32	14	1257	138.9	6.54	36.97			15			0	High	High	1	0		0		0		Carbamidomethyl [C690]
FALSE	High	Master Protein	Q6P5D8	Smchd1	structural maintenance of chromosomes flexible hinge domain-containing protein 1 [OS=Mus musculus]	0	152.846	20	32	64	32	2007	225.5	7.24	113.31			32			0	High	High	1	0		0		0		Carbamidomethyl [C84; C458; C474; C505; C624; C883; C1039; C1236; C1334; C1434]; Met-loss+Acetyl [N-Term]
FALSE	High	Master Protein	Q6P5E4	Uggt1	UDP-glucose:glycoprotein glucosyltransferase 1 [OS=Mus musculus]	0	349.665	41	52	159	52	1551	176.3	5.62	293.02	5.13		51	1		0	High	High	1	0		0		0		Carbamidomethyl [C121; C880; C1024; C1386; C1493]; Oxidation [N1257]
FALSE	High	Master Protein	Q6P5F6	Slc39a10	Zinc transporter ZIP10 [OS=Mus musculus]	0	10.069	2	2	2	2	833	94.3	6.71	5.03			2			0	High	High	1	0		0		0
FALSE	High	Master Protein	Q6P5F7	Ttyh3	Protein tweety homolog 3 [OS=Mus musculus]	0	25.777	14	5	9	5	524	57.7	5.85	9.39			5			0	High	High	1	0		0		0		Carbamidomethyl [C299]
FALSE	High	Master Protein	Q6P5F9	Xpo1	Exportin-1 [OS=Mus musculus]	0	216.945	34	33	91	33	1071	123	6.07	177.67			33			0	High	High	1	0		0		0		Carbamidomethyl [C119; C164; C369; C528; C585; C1070]; Oxidation [M73; M259; M424]; Met-loss [N-Term]
FALSE	High	Master Protein	Q6P5G6	Ubxn7	UBX domain-containing protein 7 [OS=Mus musculus]	0	22.699	11	4	11	4	467	52.1	5.03	23.66			4			0	High	High	1	0		0		0		Met-loss+Acetyl [N-Term]
FALSE	High	Master Protein	Q6P6J9	Txndc15	Thioredoxin domain-containing protein 15 [OS=Mus musculus]	0	16.458	10	2	4	2	344	38.1	4.77	13.53			2			0	High	High	1	0		0		0		Carbamidomethyl [C100; C110]
FALSE	High	Master Protein	Q6P6L0	Filip1l	Filamin A-interacting protein 1-like [OS=Mus musculus]	0	76.535	17	15	26	15	1131	129.7	6.37	57.82		6.2	14		1	0	High	High	1	0		0		0		Carbamidomethyl [C847; C988]
FALSE	High	Master Protein	Q6P8I4	Pcnp	PEST proteolytic signal-containing nuclear protein [OS=Mus musculus]	0	70.781	39	7	35	7	178	19	7.49	82.22			7			0	High	High	1	0		0		0
FALSE	High	Master Protein	Q6P8M1	Tatdn1	Putative deoxyribonuclease TATDN1 [OS=Mus musculus]	0	12.74	7	2	3	2	295	33.3	6.18	8.24			2			0	High	High	1	0		0		0
FALSE	High	Master Protein	Q6P8X1	Snx6	Sorting nexin-6 [OS=Mus musculus]	0	72.857	31	12	26	11	406	46.6	6.16	45.79			12			0	High	High	1	0		0		0		Carbamidomethyl [C149; C264; C347; C348]
FALSE	High	Master Protein	Q6P9J9	Ano6	Anoctamin-6 [OS=Mus musculus]	0	71.627	20	15	37	15	911	106.2	6.76	50.26	4.71		15	1		0	High	High	1	0		1	Deamidated [N104]	0		Carbamidomethyl [C107; C136; C262; C338; C349; C352]; Deamidated [N104]
[truncated: 2,267 more rows]

[truncated: 1 more sheets: Sheet1]
